# Supplementary material
Source: PubMed Central journal article supplement (PMC4733985)
Supplement: JVI.01464-15_zjv999091248so1.pdf [file JVI.01464-15_zjv999091248so1.pdf]

**Table S1.** Complete genome wide data set including gene name, NCBI Accession number, and Z-score.

| Gene | Gene Name       | Z-score of primary screen in HEp2 |
|------|-----------------|-----------------------------------|
| 1    | <i>PTPN9</i>    | -2.738537752                      |
| 2    | <i>TDP1</i>     | -2.624216783                      |
| 3    | <i>GLRA1</i>    | -2.581612532                      |
| 4    | <i>RAB7</i>     | -2.564733405                      |
| 5    | <i>KLF15</i>    | -2.560651623                      |
| 6    | <i>COPA</i>     | -2.548947742                      |
| 7    | <i>C9ORF123</i> | -2.548017895                      |
| 8    | <i>RAN</i>      | -2.519794586                      |
| 9    | <i>SOX2</i>     | -2.507822906                      |
| 10   | <i>ARL2</i>     | -2.503108426                      |
| 11   | <i>SCAMP2</i>   | -2.499929082                      |
| 12   | <i>UBE2I</i>    | -2.483838279                      |
| 13   | <i>RPS13</i>    | -2.474481194                      |
| 14   | <i>ASB14</i>    | -2.465730997                      |
| 15   | <i>DLEC1</i>    | -2.458548561                      |
| 16   | <i>KIF11</i>    | -2.447572549                      |
| 17   | <i>CHRD1</i>    | -2.43765162                       |
| 18   | <i>ARCN1</i>    | -2.432539912                      |
| 19   | <i>RPL27</i>    | -2.431771088                      |
| 20   | <i>CCT8</i>     | -2.429162394                      |
| 21   | <i>FBXO24</i>   | -2.423054563                      |
| 22   | <i>FABP2</i>    | -2.416764193                      |
| 23   | <i>FLNC</i>     | -2.405773404                      |
| 24   | <i>APOC1</i>    | -2.394262974                      |
| 25   | <i>TSTA3</i>    | -2.393911531                      |
| 26   | <i>OR4F15</i>   | -2.39213505                       |
| 27   | <i>LSM11</i>    | -2.390607552                      |
| 28   | <i>CAGLP</i>    | -2.362027922                      |
| 29   | <i>KISS1</i>    | -2.361229438                      |
| 30   | <i>SON</i>      | -2.355232548                      |
| 31   | <i>PHC3</i>     | -2.349961116                      |
| 32   | <i>PSMD1</i>    | -2.345419415                      |
| 33   | <i>STMN1</i>    | -2.343284431                      |
| 34   | <i>FBXO5</i>    | -2.340035562                      |
| 35   | <i>BCL2</i>     | -2.338005303                      |
| 36   | <i>RPL10L</i>   | -2.331091133                      |
| 37   | <i>KRTAP9-4</i> | -2.321598173                      |
| 38   | <i>NHP2L1</i>   | -2.320698132                      |
| 39   | <i>RPL37A</i>   | -2.319993815                      |
| 40   | <i>ARL5</i>     | -2.317519884                      |
| 41   | <i>B3GALT1</i>  | -2.317027764                      |
| 42   | <i>WBSCR20C</i> | -2.314755486                      |
| 43   | <i>RPS9</i>     | -2.304462162                      |

|    |                     |              |
|----|---------------------|--------------|
| 44 | <i>IRF7</i>         | -2.300522947 |
| 45 | <i>CREB3L4</i>      | -2.299566191 |
| 46 | <i>RP6-166C19.2</i> | -2.297791602 |
| 47 | <i>FLJ12969</i>     | -2.296959848 |
| 48 | <i>MGC22960</i>     | -2.293765145 |
| 49 | <i>ALOX5AP</i>      | -2.292005184 |
| 50 | <i>DNCI1</i>        | -2.290280385 |
| 51 | <i>BDH</i>          | -2.28814336  |
| 52 | <i>RPS29</i>        | -2.287441006 |
| 53 | <i>PBX1</i>         | -2.287329158 |
| 54 | <i>RPS3A</i>        | -2.285720154 |
| 55 | <i>TOP1</i>         | -2.2816158   |
| 56 | <i>LRRC29</i>       | -2.280021827 |
| 57 | <i>SYPL2</i>        | -2.279839609 |
| 58 | <i>SMC1L1</i>       | -2.278424502 |
| 59 | <i>LOC283726</i>    | -2.278202285 |
| 60 | <i>RPS12</i>        | -2.27817208  |
| 61 | <i>FLJ44838</i>     | -2.275425699 |
| 62 | <i>ZNF483</i>       | -2.264068152 |
| 63 | <i>NGFR</i>         | -2.257438733 |
| 64 | <i>OR3A4</i>        | -2.255691796 |
| 65 | <i>GRIN2D</i>       | -2.253916303 |
| 66 | <i>SERPINB3</i>     | -2.251964915 |
| 67 | <i>AADAC</i>        | -2.249576675 |
| 68 | <i>CCNDBP1</i>      | -2.249309769 |
| 69 | <i>TAS1R2</i>       | -2.247450141 |
| 70 | <i>HIP-55</i>       | -2.246458716 |
| 71 | <i>RPL19</i>        | -2.242817141 |
| 72 | <i>C10ORF58</i>     | -2.238543703 |
| 73 | <i>GPR108</i>       | -2.236944761 |
| 74 | <i>FURIN</i>        | -2.236379697 |
| 75 | <i>ST6GAL2</i>      | -2.235918025 |
| 76 | <i>ZCCHC5</i>       | -2.23459361  |
| 77 | <i>SS18L2</i>       | -2.234076792 |
| 78 | <i>LOC343066</i>    | -2.233646656 |
| 79 | <i>FBXO17</i>       | -2.23101061  |
| 80 | <i>LOC374768</i>    | -2.23025699  |
| 81 | <i>BCORL1</i>       | -2.229568608 |
| 82 | <i>TMEM39A</i>      | -2.228944851 |
| 83 | <i>FAM3A</i>        | -2.228484978 |
| 84 | <i>JAG2</i>         | -2.228294053 |
| 85 | <i>AGTRAP</i>       | -2.226165379 |
| 86 | <i>CDC14B</i>       | -2.225941922 |
| 87 | <i>PFDN5</i>        | -2.223923075 |
| 88 | <i>FLJ22160</i>     | -2.220342577 |
| 89 | <i>NEUROG3</i>      | -2.21936819  |
| 90 | <i>MANEA</i>        | -2.215007724 |

|     |                    |              |
|-----|--------------------|--------------|
| 91  | <i>GBF1</i>        | -2.214458349 |
| 92  | <i>ITGAX</i>       | -2.213744139 |
| 93  | <i>ARNT</i>        | -2.20970503  |
| 94  | <i>SFXN4</i>       | -2.209370476 |
| 95  | <i>SLC7A5</i>      | -2.208166422 |
| 96  | <i>FBXW9</i>       | -2.208005345 |
| 97  | <i>LOC145741</i>   | -2.204415721 |
| 98  | <i>PPAN-P2RY11</i> | -2.203735076 |
| 99  | <i>SP192</i>       | -2.202115727 |
| 100 | <i>FABP7</i>       | -2.200031342 |
| 101 | <i>EPB41L4A</i>    | -2.198569418 |
| 102 | <i>NARG2</i>       | -2.197719705 |
| 103 | <i>RPL17</i>       | -2.196714365 |
| 104 | <i>CFC1</i>        | -2.195646166 |
| 105 | <i>SGOL1</i>       | -2.195384255 |
| 106 | <i>FAM83G</i>      | -2.188283444 |
| 107 | <i>OR2A14</i>      | -2.187307027 |
| 108 | <i>PSMB1</i>       | -2.18716256  |
| 109 | <i>PGLYRP4</i>     | -2.18711354  |
| 110 | <i>LNK</i>         | -2.185376394 |
| 111 | <i>HLA-E</i>       | -2.182816575 |
| 112 | <i>FLJ38984</i>    | -2.180502587 |
| 113 | <i>PTGIS</i>       | -2.17764803  |
| 114 | <i>RASIP1</i>      | -2.177510215 |
| 115 | <i>LRRC6</i>       | -2.176714526 |
| 116 | <i>DCDC1</i>       | -2.172606411 |
| 117 | <i>GPR3</i>        | -2.171187576 |
| 118 | <i>FLJ21148</i>    | -2.170668387 |
| 119 | <i>TBX3</i>        | -2.169469921 |
| 120 | <i>ZMPSTE24</i>    | -2.169364959 |
| 121 | <i>TNNT1</i>       | -2.168823649 |
| 122 | <i>POF1B</i>       | -2.164764938 |
| 123 | <i>LTB4DH</i>      | -2.164748773 |
| 124 | <i>MGC57858</i>    | -2.164734728 |
| 125 | <i>FLJ31978</i>    | -2.162587876 |
| 126 | <i>P8</i>          | -2.161314981 |
| 127 | <i>KCNN1</i>       | -2.160553793 |
| 128 | <i>DDX20</i>       | -2.160059995 |
| 129 | <i>HSPA12A</i>     | -2.15973918  |
| 130 | <i>ATP1A1</i>      | -2.159289429 |
| 131 | <i>GPS2</i>        | -2.158852902 |
| 132 | <i>KIAA1856</i>    | -2.157968687 |
| 133 | <i>LOC196394</i>   | -2.153418668 |
| 134 | <i>C17ORF32</i>    | -2.152870029 |
| 135 | <i>KRT10</i>       | -2.148711985 |
| 136 | <i>FLJ41287</i>    | -2.148305764 |
| 137 | <i>GASP2</i>       | -2.147297801 |

|     |                  |              |
|-----|------------------|--------------|
| 138 | <i>HIST1H2BB</i> | -2.147107444 |
| 139 | <i>LOC134145</i> | -2.146823432 |
| 140 | <i>MSX2</i>      | -2.145522627 |
| 141 | <i>C21ORF5</i>   | -2.144435486 |
| 142 | <i>FAM47E</i>    | -2.141978303 |
| 143 | <i>FZD8</i>      | -2.141090839 |
| 144 | <i>SOCS1</i>     | -2.140977295 |
| 145 | <i>NOD3</i>      | -2.140950328 |
| 146 | <i>IL17E</i>     | -2.140646819 |
| 147 | <i>MRPL16</i>    | -2.140070357 |
| 148 | <i>TOP1MT</i>    | -2.140058614 |
| 149 | <i>LOC400451</i> | -2.138740519 |
| 150 | <i>OSR2</i>      | -2.135712641 |
| 151 | <i>CSPG6</i>     | -2.13550418  |
| 152 | <i>RPL3</i>      | -2.134548433 |
| 153 | <i>CLIC6</i>     | -2.134276265 |
| 154 | <i>KPNB1</i>     | -2.131225106 |
| 155 | <i>TRPV3</i>     | -2.131184791 |
| 156 | <i>NTN2L</i>     | -2.129275631 |
| 157 | <i>FLJ22679</i>  | -2.128476112 |
| 158 | <i>UBL3</i>      | -2.128159838 |
| 159 | <i>CAST</i>      | -2.127953498 |
| 160 | <i>LOC338761</i> | -2.127138535 |
| 161 | <i>LASS6</i>     | -2.123385179 |
| 162 | <i>SMC4L1</i>    | -2.122682322 |
| 163 | <i>FSTL4</i>     | -2.121723295 |
| 164 | <i>STMN4</i>     | -2.120225575 |
| 165 | <i>MS4A2</i>     | -2.119746338 |
| 166 | <i>ADAM22</i>    | -2.119140114 |
| 167 | <i>ADAM33</i>    | -2.118435928 |
| 168 | <i>FLJ35725</i>  | -2.116826907 |
| 169 | <i>LOC392360</i> | -2.114746692 |
| 170 | <i>GPBAR1</i>    | -2.114035581 |
| 171 | <i>RAD52</i>     | -2.114030295 |
| 172 | <i>PTGFR</i>     | -2.113097576 |
| 173 | <i>ASB4</i>      | -2.112678639 |
| 174 | <i>PCDHB11</i>   | -2.11212725  |
| 175 | <i>LOC153328</i> | -2.11151638  |
| 176 | <i>KIAA1163</i>  | -2.11134711  |
| 177 | <i>YME1L1</i>    | -2.111341566 |
| 178 | <i>NAT9</i>      | -2.110019797 |
| 179 | <i>PFN1</i>      | -2.110017377 |
| 180 | <i>CYP2C19</i>   | -2.108539092 |
| 181 | <i>SHOX2</i>     | -2.107626759 |
| 182 | <i>BCAP31</i>    | -2.105612466 |
| 183 | <i>DARS</i>      | -2.105232423 |
| 184 | <i>CAMK1D</i>    | -2.103709455 |

|     |                   |              |
|-----|-------------------|--------------|
| 185 | <i>DHRS10</i>     | -2.102915965 |
| 186 | <i>MGC11335</i>   | -2.102153991 |
| 187 | <i>SVIL</i>       | -2.101924693 |
| 188 | <i>UGA</i>        | -2.1         |
| 189 | <i>COPB2</i>      | -2.09992745  |
| 190 | <i>FLJ35954</i>   | -2.099587539 |
| 191 | <i>GPR</i>        | -2.099569085 |
| 192 | <i>MS4A5</i>      | -2.099544548 |
| 193 | <i>PSMC6</i>      | -2.097028265 |
| 194 | <i>HMGCS2</i>     | -2.096454528 |
| 195 | <i>FLJ90575</i>   | -2.095769131 |
| 196 | <i>NUDT2</i>      | -2.093612134 |
| 197 | <i>IL1F6</i>      | -2.093605632 |
| 198 | <i>PSMA5</i>      | -2.092271577 |
| 199 | <i>IFNA16</i>     | -2.091965054 |
| 200 | <i>C6ORF168</i>   | -2.091618636 |
| 201 | <i>LOC200373</i>  | -2.09127336  |
| 202 | <i>ARHE</i>       | -2.090739091 |
| 203 | <i>LAX1</i>       | -2.089834151 |
| 204 | <i>MOX2</i>       | -2.089368068 |
| 205 | <i>ZNF445</i>     | -2.089318549 |
| 206 | <i>ZNF70</i>      | -2.089172957 |
| 207 | <i>PPP1R15B</i>   | -2.086976718 |
| 208 | <i>SNX1</i>       | -2.086752572 |
| 209 | <i>CYBA</i>       | -2.083910204 |
| 210 | <i>CCDC7</i>      | -2.082920884 |
| 211 | <i>PSMD11</i>     | -2.082515367 |
| 212 | <i>NUP62</i>      | -2.082327999 |
| 213 | <i>MGC4825</i>    | -2.082282845 |
| 214 | <i>UNC13B</i>     | -2.079964567 |
| 215 | <i>ZNF403</i>     | -2.079598278 |
| 216 | <i>CD1B</i>       | -2.076771296 |
| 217 | <i>KRTAP10-10</i> | -2.076690805 |
| 218 | <i>EIF3K</i>      | -2.076448597 |
| 219 | <i>LIN28</i>      | -2.074973924 |
| 220 | <i>SSTR4</i>      | -2.073157778 |
| 221 | <i>LILRA1</i>     | -2.0719926   |
| 222 | <i>FLJ10379</i>   | -2.07189426  |
| 223 | <i>IGSF3</i>      | -2.071312906 |
| 224 | <i>GRINA</i>      | -2.070901051 |
| 225 | <i>SLC30A1</i>    | -2.070594624 |
| 226 | <i>VDAC2</i>      | -2.070591903 |
| 227 | <i>MARS2</i>      | -2.069905645 |
| 228 | <i>UTP14C</i>     | -2.069376153 |
| 229 | <i>NROB2</i>      | -2.069031915 |
| 230 | <i>FLJ13615</i>   | -2.068266919 |
| 231 | <i>TEX9</i>       | -2.066722417 |

|     |           |              |
|-----|-----------|--------------|
| 232 | TAPBPL    | -2.066215745 |
| 233 | NUP85     | -2.063908112 |
| 234 | LOC138046 | -2.059819369 |
| 235 | GRASP     | -2.057956533 |
| 236 | DAAM2     | -2.057644559 |
| 237 | LR8       | -2.056959228 |
| 238 | TNFRSF14  | -2.056814864 |
| 239 | FBXO33    | -2.056081326 |
| 240 | EPPB9     | -2.055474299 |
| 241 | MUC13     | -2.054576178 |
| 242 | C6ORF80   | -2.054069401 |
| 243 | CNKSR1    | -2.053703932 |
| 244 | GGT1      | -2.053468036 |
| 245 | SLC15A4   | -2.052130344 |
| 246 | C21ORF7   | -2.052035208 |
| 247 | ET        | -2.051877276 |
| 248 | SERPINE1  | -2.049664085 |
| 249 | SPEC1     | -2.049313291 |
| 250 | C7ORF9    | -2.047845423 |
| 251 | FOXE1     | -2.046545662 |
| 252 | FBXO41    | -2.046301669 |
| 253 | SC4MOL    | -2.046121896 |
| 254 | ALDH1A3   | -2.045985854 |
| 255 | RPL30     | -2.045874158 |
| 256 | BPY2      | -2.044446913 |
| 257 | KIAA1441  | -2.043764496 |
| 258 | ZNF384    | -2.043321737 |
| 259 | EPB42     | -2.042979689 |
| 260 | RPL35A    | -2.042801335 |
| 261 | CD37      | -2.041986322 |
| 262 | PIK4CB    | -2.041666281 |
| 263 | RPS28     | -2.039902901 |
| 264 | PIP5K1A   | -2.039825124 |
| 265 | ANXA10    | -2.039414155 |
| 266 | UFC1      | -2.038746172 |
| 267 | AP2S1     | -2.038394631 |
| 268 | OXER1     | -2.038109657 |
| 269 | PDE8B     | -2.038103625 |
| 270 | PSMB3     | -2.03807125  |
| 271 | THY28     | -2.03786968  |
| 272 | LRIG3     | -2.03703198  |
| 273 | CGB       | -2.035851646 |
| 274 | UNC13D    | -2.035744544 |
| 275 | OBFC1     | -2.035450653 |
| 276 | WASPIP    | -2.035210212 |
| 277 | ACP1      | -2.034999289 |
| 278 | ALX4      | -2.034662647 |

|     |           |              |
|-----|-----------|--------------|
| 279 | STRAP     | -2.034262877 |
| 280 | GALNT10   | -2.034013104 |
| 281 | CDY1B     | -2.033680236 |
| 282 | FLJ20422  | -2.033504249 |
| 283 | NOS2A     | -2.032928778 |
| 284 | FAU       | -2.032020817 |
| 285 | FLJ14624  | -2.031852354 |
| 286 | PDCL3     | -2.030973129 |
| 287 | DHX37     | -2.030964644 |
| 288 | RLN3      | -2.029807412 |
| 289 | ECHDC1    | -2.02944487  |
| 290 | COMT      | -2.029150688 |
| 291 | FLJ46481  | -2.028848424 |
| 292 | RINT-1    | -2.028776376 |
| 293 | KRTHA1    | -2.028197484 |
| 294 | TJP2      | -2.027115596 |
| 295 | LOC253982 | -2.026045172 |
| 296 | PPRC1     | -2.025771616 |
| 297 | NDST4     | -2.025206442 |
| 298 | ACTG1     | -2.024934981 |
| 299 | SHD       | -2.024927579 |
| 300 | RPS24     | -2.024808692 |
| 301 | IL28B     | -2.024514689 |
| 302 | PSMD6     | -2.02447849  |
| 303 | LOC51058  | -2.022501099 |
| 304 | LOC154907 | -2.022487662 |
| 305 | KCNA2     | -2.022364911 |
| 306 | LOC92235  | -2.022005995 |
| 307 | VCP       | -2.020807912 |
| 308 | MGC12197  | -2.019396948 |
| 309 | LOC284123 | -2.018604743 |
| 310 | PSMA3     | -2.018151472 |
| 311 | CREBL1    | -2.018136325 |
| 312 | FBXO7     | -2.01796185  |
| 313 | SFI1      | -2.017826297 |
| 314 | NFKBIL2   | -2.017508489 |
| 315 | RASGRP3   | -2.017360336 |
| 316 | COPZ1     | -2.017177504 |
| 317 | MGC42090  | -2.01709049  |
| 318 | DHX8      | -2.016272849 |
| 319 | KATNAL2   | -2.015813734 |
| 320 | SLC5A9    | -2.015494787 |
| 321 | MAP7      | -2.014836771 |
| 322 | MGC10820  | -2.014522678 |
| 323 | SFRS14    | -2.013680042 |
| 324 | KIAA1912  | -2.013648237 |
| 325 | URB1      | -2.013251215 |

|     |                  |              |
|-----|------------------|--------------|
| 326 | <i>SYCN</i>      | -2.01317113  |
| 327 | <i>ABI1</i>      | -2.012975482 |
| 328 | <i>C10ORF119</i> | -2.012736664 |
| 329 | <i>MGC3040</i>   | -2.01269528  |
| 330 | <i>MYO1F</i>     | -2.012015352 |
| 331 | <i>EPM2A</i>     | -2.010802245 |
| 332 | <i>FLJ31052</i>  | -2.010525564 |
| 333 | <i>FLJ32830</i>  | -2.010032759 |
| 334 | <i>ZNF499</i>    | -2.009571027 |
| 335 | <i>SLC2A1</i>    | -2.009060145 |
| 336 | <i>CHRNA2</i>    | -2.008453279 |
| 337 | <i>BCL3</i>      | -2.008090794 |
| 338 | <i>LOC58489</i>  | -2.00806152  |
| 339 | <i>KIAA0431</i>  | -2.005690926 |
| 340 | <i>TIMM13</i>    | -2.005455882 |
| 341 | <i>GMIP</i>      | -2.004326645 |
| 342 | <i>PRKWINK2</i>  | -2.003191922 |
| 343 | <i>RIPK2</i>     | -2.00274791  |
| 344 | <i>SSTR5</i>     | -2.002498636 |
| 345 | <i>OR2AG1</i>    | -2.002257005 |
| 346 | <i>CIAS1</i>     | -2.001496197 |
| 347 | <i>RPS27A</i>    | -2.001435514 |
| 348 | <i>TNFRSF6B</i>  | -2.001341717 |
| 349 | <i>LOC389119</i> | -1.999824427 |
| 350 | <i>PRKCB1</i>    | -1.999460799 |
| 351 | <i>MGC40405</i>  | -1.999243648 |
| 352 | <i>MGC11266</i>  | -1.999074499 |
| 353 | <i>FBXO46</i>    | -1.9989575   |
| 354 | <i>DPCR1</i>     | -1.998752414 |
| 355 | <i>PRKAB2</i>    | -1.998439726 |
| 356 | <i>FLJ20582</i>  | -1.998194844 |
| 357 | <i>HELB</i>      | -1.996754149 |
| 358 | <i>ITGB2</i>     | -1.995540439 |
| 359 | <i>CSPG2</i>     | -1.995298995 |
| 360 | <i>FLJ13639</i>  | -1.995261594 |
| 361 | <i>MGC34648</i>  | -1.994609761 |
| 362 | <i>SLC25A29</i>  | -1.993918039 |
| 363 | <i>EPHA4</i>     | -1.993603167 |
| 364 | <i>BCL2L12</i>   | -1.993495665 |
| 365 | <i>ADMR</i>      | -1.99315671  |
| 366 | <i>SEMA6B</i>    | -1.992447259 |
| 367 | <i>ARID5B</i>    | -1.991576165 |
| 368 | <i>FLJ32859</i>  | -1.991181914 |
| 369 | <i>TLE4</i>      | -1.990470253 |
| 370 | <i>SFRS14</i>    | -1.990440857 |
| 371 | <i>UGT2B28</i>   | -1.989269461 |
| 372 | <i>MGC5391</i>   | -1.988877482 |



|     |           |              |
|-----|-----------|--------------|
| 373 | AGRN      | -1.988639311 |
| 374 | COL4A5    | -1.987836957 |
| 375 | KIAA1285  | -1.987636495 |
| 376 | FLJ33860  | -1.986738605 |
| 377 | FLJ10652  | -1.98669565  |
| 378 | FLJ20530  | -1.986017967 |
| 379 | SLC4A11   | -1.985830447 |
| 380 | ZNF563    | -1.985087222 |
| 381 | WDR21     | -1.98466654  |
| 382 | KIAA1117  | -1.9833563   |
| 383 | MGC15631  | -1.983335772 |
| 384 | SYNGR3    | -1.983115749 |
| 385 | LOC390226 | -1.982973925 |
| 386 | LOC91966  | -1.982844521 |
| 387 | LOC51337  | -1.982409937 |
| 388 | AOX1      | -1.981988054 |
| 389 | FLJ36445  | -1.98157035  |
| 390 | FOXD2     | -1.980818793 |
| 391 | RICS      | -1.980472418 |
| 392 | TSKS      | -1.98015231  |
| 393 | PINK1     | -1.980071482 |
| 394 | DTYMK     | -1.979778274 |
| 395 | PECR      | -1.978777199 |
| 396 | P66ALPHA  | -1.97717896  |
| 397 | POLR3E    | -1.977075083 |
| 398 | RAB11A    | -1.976933444 |
| 399 | NEF3      | -1.976782617 |
| 400 | ACYP1     | -1.975918746 |
| 401 | TBX1      | -1.974679304 |
| 402 | ENDOG     | -1.974398775 |
| 403 | APG4A     | -1.974331699 |
| 404 | HBZ       | -1.973749722 |
| 405 | OR4L1     | -1.972834644 |
| 406 | EIF3S4    | -1.972522682 |
| 407 | ATP2A2    | -1.972236852 |
| 408 | EIF4G2    | -1.97183751  |
| 409 | ITGAD     | -1.971771932 |
| 410 | TSNAX     | -1.97177167  |
| 411 | PAQR4     | -1.971666484 |
| 412 | LUZP1     | -1.96952889  |
| 413 | UBC       | -1.969467286 |
| 414 | FLJ21159  | -1.96925211  |
| 415 | EIF4A1    | -1.9688899   |
| 416 | APLP2     | -1.968844855 |
| 417 | LOH11CR2A | -1.968562704 |
| 418 | SLC22A1LS | -1.968495926 |
| 419 | SPSB1     | -1.968283813 |

|     |           |              |
|-----|-----------|--------------|
| 420 | NEK9      | -1.967914324 |
| 421 | CCT6A     | -1.967224869 |
| 422 | OR10S1    | -1.967190402 |
| 423 | CSNK1E    | -1.967102078 |
| 424 | LOC645037 | -1.96668588  |
| 425 | SPANXB2   | -1.966565121 |
| 426 | RGS19     | -1.965930831 |
| 427 | APBB1     | -1.965666981 |
| 428 | GPR78     | -1.964989385 |
| 429 | SELM      | -1.964713499 |
| 430 | LRAT      | -1.963864501 |
| 431 | SYS1      | -1.963144023 |
| 432 | ITGA4     | -1.962801494 |
| 433 | HTR3A     | -1.962583131 |
| 434 | SLC22A2   | -1.961945723 |
| 435 | DLD       | -1.961866217 |
| 436 | INM01     | -1.960464654 |
| 437 | P38IP     | -1.960151267 |
| 438 | KIAA1171  | -1.958902124 |
| 439 | KRTAP4-12 | -1.958587402 |
| 440 | Tox       | -1.958490985 |
| 441 | SF3B5     | -1.958432105 |
| 442 | ZNF271    | -1.957827965 |
| 443 | SYNGR1    | -1.956474868 |
| 444 | MPP2      | -1.956380428 |
| 445 | SFTPC     | -1.956127995 |
| 446 | UBE2D4    | -1.956112112 |
| 447 | CAPS      | -1.955102016 |
| 448 | LOC51760  | -1.954314866 |
| 449 | FLJ38451  | -1.95421857  |
| 450 | C20ORF55  | -1.95403311  |
| 451 | PIK4CA    | -1.953300455 |
| 452 | RHAG      | -1.952749152 |
| 453 | MALT1     | -1.952726962 |
| 454 | STXBP5    | -1.952716436 |
| 455 | GPR17     | -1.951973358 |
| 456 | AASDH     | -1.951310383 |
| 457 | ABI3      | -1.950976943 |
| 458 | DKK3      | -1.950833989 |
| 459 | EXOSC6    | -1.949597027 |
| 460 | OXTR      | -1.948664918 |
| 461 | CLNS1A    | -1.948478686 |
| 462 | MYH4      | -1.948243791 |
| 463 | EB-1      | -1.947594039 |
| 464 | PSMC1     | -1.947363961 |
| 465 | QTRT1     | -1.945991111 |
| 466 | NUP133    | -1.945182999 |

|     |                  |              |
|-----|------------------|--------------|
| 467 | <i>SLC1A4</i>    | -1.944738679 |
| 468 | <i>GAGE8</i>     | -1.94451382  |
| 469 | <i>LTBP3</i>     | -1.943317965 |
| 470 | <i>ISYNA1</i>    | -1.943181883 |
| 471 | <i>CPSF5</i>     | -1.942970957 |
| 472 | <i>QSCN6</i>     | -1.942731358 |
| 473 | <i>LAPTM5</i>    | -1.94216021  |
| 474 | <i>RCE1</i>      | -1.942012262 |
| 475 | <i>LOC129401</i> | -1.941159434 |
| 476 | <i>CABYR</i>     | -1.940579052 |
| 477 | <i>ENDOGL1</i>   | -1.939153594 |
| 478 | <i>NOR1</i>      | -1.938001553 |
| 479 | <i>CSNK2B</i>    | -1.937379319 |
| 480 | <i>ORMDL2</i>    | -1.936919888 |
| 481 | <i>AVIL</i>      | -1.936822927 |
| 482 | <i>ECRG4</i>     | -1.936629463 |
| 483 | <i>GAL3ST3</i>   | -1.935600836 |
| 484 | <i>ATP6V0A2</i>  | -1.934600253 |
| 485 | <i>GHRHR</i>     | -1.933596985 |
| 486 | <i>PPGB</i>      | -1.933439398 |
| 487 | <i>FLJ12953</i>  | -1.932074313 |
| 488 | <i>ATP6V0D1</i>  | -1.931661067 |
| 489 | <i>C9ORF96</i>   | -1.931338714 |
| 490 | <i>ASNS</i>      | -1.931037012 |
| 491 | <i>PVR</i>       | -1.931018742 |
| 492 | <i>ANKRD2</i>    | -1.930867961 |
| 493 | <i>CSNK2A1</i>   | -1.930440636 |
| 494 | <i>SLC26A10</i>  | -1.930278882 |
| 495 | <i>MMP28</i>     | -1.929991936 |
| 496 | <i>CDC20</i>     | -1.929906215 |
| 497 | <i>ATP6V1B2</i>  | -1.929845171 |
| 498 | <i>TULP2</i>     | -1.929597586 |
| 499 | <i>FLJ11021</i>  | -1.928825177 |
| 500 | <i>CRK7</i>      | -1.928289303 |
| 501 | <i>KCNV2</i>     | -1.928074958 |
| 502 | <i>C20ORF166</i> | -1.927784806 |
| 503 | <i>STK29</i>     | -1.927286271 |
| 504 | <i>TFCP2</i>     | -1.927198679 |
| 505 | <i>MAP3K5</i>    | -1.926976096 |
| 506 | <i>24432</i>     | -1.926618209 |
| 507 | <i>KCNJ3</i>     | -1.926529221 |
| 508 | <i>CGREF1</i>    | -1.926175479 |
| 509 | <i>RBM3</i>      | -1.925850508 |
| 510 | <i>UCP2</i>      | -1.925291655 |
| 511 | <i>OR11H6</i>    | -1.92500835  |
| 512 | <i>OPRS1</i>     | -1.923902363 |
| 513 | <i>TEKT1</i>     | -1.923264381 |

|     |                  |              |
|-----|------------------|--------------|
| 514 | <i>ETEA</i>      | -1.923251467 |
| 515 | <i>FLJ10055</i>  | -1.923251467 |
| 516 | <i>C16ORF35</i>  | -1.92300765  |
| 517 | <i>MUC2</i>      | -1.92290105  |
| 518 | <i>SIP</i>       | -1.922861272 |
| 519 | <i>LOC340156</i> | -1.922772627 |
| 520 | <i>CNGA3</i>     | -1.921892011 |
| 521 | <i>TNK2</i>      | -1.920804043 |
| 522 | <i>THRAP1</i>    | -1.920327185 |
| 523 | <i>AKR7A2</i>    | -1.919412979 |
| 524 | <i>FLJ27505</i>  | -1.919072521 |
| 525 | <i>RNF150</i>    | -1.918047368 |
| 526 | <i>BIN2</i>      | -1.917858997 |
| 527 | <i>RPS2</i>      | -1.916843071 |
| 528 | <i>ZNF14</i>     | -1.916698657 |
| 529 | <i>MIPOL1</i>    | -1.915237386 |
| 530 | <i>GRAMD3</i>    | -1.914877823 |
| 531 | <i>TPRT</i>      | -1.91451797  |
| 532 | <i>WDR7</i>      | -1.914211316 |
| 533 | <i>FBXO36</i>    | -1.913959184 |
| 534 | <i>GIYD1</i>     | -1.913763644 |
| 535 | <i>DNAJC4</i>    | -1.913180342 |
| 536 | <i>LOC196913</i> | -1.913177396 |
| 537 | <i>FUT8</i>      | -1.912397319 |
| 538 | <i>OR52A4</i>    | -1.912210782 |
| 539 | <i>GMPS</i>      | -1.912062592 |
| 540 | <i>SLC36A2</i>   | -1.912059774 |
| 541 | <i>LAMR1</i>     | -1.911776993 |
| 542 | <i>MOBKL1A</i>   | -1.911279684 |
| 543 | <i>ITK</i>       | -1.911011283 |
| 544 | <i>UCHL3</i>     | -1.910819861 |
| 545 | <i>C9ORF156</i>  | -1.90974735  |
| 546 | <i>TSPYL2</i>    | -1.908470745 |
| 547 | <i>TUBB</i>      | -1.908073925 |
| 548 | <i>PIK3R4</i>    | -1.907908993 |
| 549 | <i>TAO1</i>      | -1.90765983  |
| 550 | <i>FLJ35838</i>  | -1.907246351 |
| 551 | <i>PACSIN2</i>   | -1.907207513 |
| 552 | <i>KIAA1970</i>  | -1.906389684 |
| 553 | <i>MTMR7</i>     | -1.905964519 |
| 554 | <i>EPN1</i>      | -1.905849076 |
| 555 | <i>MDFI</i>      | -1.905849076 |
| 556 | <i>LOC170261</i> | -1.905827063 |
| 557 | <i>SLC16A14</i>  | -1.905736233 |
| 558 | <i>LTBP2</i>     | -1.905357413 |
| 559 | <i>FLJ12750</i>  | -1.904974867 |
| 560 | <i>BMP7</i>      | -1.904448337 |

|     |                  |              |
|-----|------------------|--------------|
| 561 | <i>DHX35</i>     | -1.904306127 |
| 562 | <i>Polio #1</i>  | -1.904167417 |
| 563 | <i>PNLIPRP3</i>  | -1.903774999 |
| 564 | <i>AP4M1</i>     | -1.903043001 |
| 565 | <i>FASN</i>      | -1.902589126 |
| 566 | <i>NUPL1</i>     | -1.90254843  |
| 567 | <i>LDHAL6B</i>   | -1.90083114  |
| 568 | <i>CRYGC</i>     | -1.900809689 |
| 569 | <i>FLJ10547</i>  | -1.900745772 |
| 570 | <i>ADRA1B</i>    | -1.899101447 |
| 571 | <i>GHSR</i>      | -1.897971893 |
| 572 | <i>ADAM2</i>     | -1.897706302 |
| 573 | <i>RAI</i>       | -1.897279456 |
| 574 | <i>NDUFB7</i>    | -1.896925198 |
| 575 | <i>BPIL1</i>     | -1.896316531 |
| 576 | <i>GPATC2</i>    | -1.895983377 |
| 577 | <i>HABP4</i>     | -1.895136303 |
| 578 | <i>VIP</i>       | -1.894877415 |
| 579 | <i>BSPH1</i>     | -1.894134935 |
| 580 | <i>USP3</i>      | -1.894060621 |
| 581 | <i>NXF1</i>      | -1.892879764 |
| 582 | <i>HNRPK</i>     | -1.892775539 |
| 583 | <i>FAM12B</i>    | -1.89277203  |
| 584 | <i>C14ORF138</i> | -1.892589035 |
| 585 | <i>FLJ25056</i>  | -1.89227194  |
| 586 | <i>IGSF9</i>     | -1.892197803 |
| 587 | <i>PTCD2</i>     | -1.892095631 |
| 588 | <i>MGC21675</i>  | -1.891873161 |
| 589 | <i>LOC152519</i> | -1.890980801 |
| 590 | <i>DLGAP4</i>    | -1.89076539  |
| 591 | <i>SLC35F2</i>   | -1.890553988 |
| 592 | <i>AOC2</i>      | -1.889622882 |
| 593 | <i>CKLFSF7</i>   | -1.889190929 |
| 594 | <i>CSN1S1</i>    | -1.889124243 |
| 595 | <i>PFC</i>       | -1.888888987 |
| 596 | <i>TAAR9</i>     | -1.888696982 |
| 597 | <i>FLJ14959</i>  | -1.888112953 |
| 598 | <i>LOC728656</i> | -1.887798668 |
| 599 | <i>C14ORF87</i>  | -1.887660193 |
| 600 | <i>LOC391253</i> | -1.887614085 |
| 601 | <i>GPR92</i>     | -1.887583704 |
| 602 | <i>TNFRSF1A</i>  | -1.886994986 |
| 603 | <i>TCP1</i>      | -1.886804424 |
| 604 | <i>UPP2</i>      | -1.886799924 |
| 605 | <i>SKIIP</i>     | -1.886475971 |
| 606 | <i>STARD7</i>    | -1.885913397 |
| 607 | <i>AGPAT2</i>    | -1.885334446 |

|     |                  |              |
|-----|------------------|--------------|
| 608 | <i>FBXO25</i>    | -1.884931403 |
| 609 | <i>KIAA0999</i>  | -1.884577861 |
| 610 | <i>ACBD6</i>     | -1.884197399 |
| 611 | <i>CAMK2D</i>    | -1.884168332 |
| 612 | <i>MRGPRE</i>    | -1.884167563 |
| 613 | <i>CAPN1</i>     | -1.883811806 |
| 614 | <i>LOC91942</i>  | -1.883790818 |
| 615 | <i>FLJ20032</i>  | -1.883790818 |
| 616 | <i>CMTM1</i>     | -1.883412407 |
| 617 | <i>LOC203522</i> | -1.88291574  |
| 618 | <i>PSMC5</i>     | -1.882778074 |
| 619 | <i>RBMY1D</i>    | -1.882474668 |
| 620 | <i>CXCL9</i>     | -1.881456145 |
| 621 | <i>TPM1</i>      | -1.881427619 |
| 622 | <i>RAB25</i>     | -1.881411257 |
| 623 | <i>BAPX1</i>     | -1.881212771 |
| 624 | <i>SOX12</i>     | -1.880674063 |
| 625 | <i>FLJ45459</i>  | -1.880673733 |
| 626 | <i>TM2D2</i>     | -1.880112961 |
| 627 | <i>TNFSF7</i>    | -1.880098426 |
| 628 | <i>NEIL2</i>     | -1.879557797 |
| 629 | <i>TGFBR2</i>    | -1.879202991 |
| 630 | <i>CNOT3</i>     | -1.879166739 |
| 631 | <i>PDGFRB</i>    | -1.878806396 |
| 632 | <i>SDK1</i>      | -1.878658438 |
| 633 | <i>CAPN9</i>     | -1.877671016 |
| 634 | <i>TTPA</i>      | -1.877158877 |
| 635 | <i>LOC285033</i> | -1.876947951 |
| 636 | <i>MRLC2</i>     | -1.876545491 |
| 637 | <i>APBB1IP</i>   | -1.876471749 |
| 638 | <i>C10ORF26</i>  | -1.874283498 |
| 639 | <i>TNT</i>       | -1.874208972 |
| 640 | <i>HAND1</i>     | -1.872119858 |
| 641 | <i>FLJ10884</i>  | -1.871985696 |
| 642 | <i>FLJ10916</i>  | -1.871825629 |
| 643 | <i>KRTAP5-7</i>  | -1.871579807 |
| 644 | <i>RAD21</i>     | -1.871119641 |
| 645 | <i>PITX3</i>     | -1.870929551 |
| 646 | <i>MGST2</i>     | -1.870659869 |
| 647 | <i>MGC26605</i>  | -1.870238313 |
| 648 | <i>DDX48</i>     | -1.870127337 |
| 649 | <i>STK22C</i>    | -1.870119879 |
| 650 | <i>TA-KRP</i>    | -1.869864555 |
| 651 | <i>D1S155E</i>   | -1.869683825 |
| 652 | <i>USP44</i>     | -1.869440413 |
| 653 | <i>DEFA6</i>     | -1.868994305 |
| 654 | <i>C1orf48</i>   | -1.868953654 |

|     |                  |              |
|-----|------------------|--------------|
| 655 | <i>MGC33584</i>  | -1.868714123 |
| 656 | <i>FAM108A2</i>  | -1.868180702 |
| 657 | <i>NCK2</i>      | -1.868037092 |
| 658 | <i>EGLN3</i>     | -1.867851119 |
| 659 | <i>SLC2A8</i>    | -1.86746001  |
| 660 | <i>DOCK10</i>    | -1.867393454 |
| 661 | <i>GPR56</i>     | -1.867370987 |
| 662 | <i>LOC51161</i>  | -1.866104788 |
| 663 | <i>LOC400506</i> | -1.866090988 |
| 664 | <i>ZNF517</i>    | -1.865973134 |
| 665 | <i>FLJ21616</i>  | -1.86586758  |
| 666 | <i>FLJ32880</i>  | -1.865843582 |
| 667 | <i>MRPL4</i>     | -1.865778662 |
| 668 | <i>LOC51123</i>  | -1.865670904 |
| 669 | <i>C12ORF8</i>   | -1.865546776 |
| 670 | <i>HIC</i>       | -1.865454807 |
| 671 | <i>ZFP36L2</i>   | -1.864205615 |
| 672 | <i>CCBL1</i>     | -1.86320298  |
| 673 | <i>FLJ34512</i>  | -1.863188656 |
| 674 | <i>PDCD8</i>     | -1.862720399 |
| 675 | <i>CTRB1</i>     | -1.862509679 |
| 676 | <i>NARF</i>      | -1.862194311 |
| 677 | <i>TCEB3</i>     | -1.861763596 |
| 678 | <i>NAB2</i>      | -1.861730444 |
| 679 | <i>FLJ13576</i>  | -1.861207218 |
| 680 | <i>SLC39A12</i>  | -1.860999779 |
| 681 | <i>NOV</i>       | -1.860330156 |
| 682 | <i>RPL38</i>     | -1.859954533 |
| 683 | <i>ITPKC</i>     | -1.859886469 |
| 684 | <i>FLJ38753</i>  | -1.859764329 |
| 685 | <i>PIK3R3</i>    | -1.859290233 |
| 686 | <i>ORC5L</i>     | -1.859204924 |
| 687 | <i>GTF2E1</i>    | -1.858791431 |
| 688 | <i>PIM1</i>      | -1.858748431 |
| 689 | <i>UBB</i>       | -1.858710731 |
| 690 | <i>SRP72</i>     | -1.858244242 |
| 691 | <i>FKBP4</i>     | -1.858089329 |
| 692 | <i>SLC6A8</i>    | -1.85801584  |
| 693 | <i>P11</i>       | -1.857564542 |
| 694 | <i>ASGR1</i>     | -1.856906728 |
| 695 | <i>PPP4R1</i>    | -1.85676463  |
| 696 | <i>MGC71999</i>  | -1.855967931 |
| 697 | <i>EDG5</i>      | -1.855858694 |
| 698 | <i>SNAPC5</i>    | -1.855850972 |
| 699 | <i>POLD3</i>     | -1.855656211 |
| 700 | <i>NR1H4</i>     | -1.855532414 |
| 701 | <i>SERF2</i>     | -1.855520959 |

|     |           |              |
|-----|-----------|--------------|
| 702 | ERCC3     | -1.854869398 |
| 703 | FLJ46688  | -1.853627361 |
| 704 | OR5V1     | -1.853325957 |
| 705 | PMS1      | -1.852233967 |
| 706 | HIST1H2BK | -1.851712787 |
| 707 | DCP2      | -1.851199153 |
| 708 | INSRR     | -1.8511922   |
| 709 | OSBP      | -1.851125323 |
| 710 | FADS2     | -1.85053124  |
| 711 | FXVD5     | -1.850478965 |
| 712 | SSR3      | -1.850440471 |
| 713 | STX4A     | -1.85027465  |
| 714 | SFRS15    | -1.850121982 |
| 715 | PSMD14    | -1.849996122 |
| 716 | NET-7     | -1.849208057 |
| 717 | LOC147808 | -1.848940666 |
| 718 | FLJ38716  | -1.848479157 |
| 719 | TNFRSF10B | -1.848058041 |
| 720 | ASB5      | -1.847922933 |
| 721 | TAS1R3    | -1.847674011 |
| 722 | FLJ20125  | -1.847231027 |
| 723 | UFM1      | -1.845768503 |
| 724 | PSMC2     | -1.845662072 |
| 725 | RHD       | -1.845451566 |
| 726 | OR56B4    | -1.844880727 |
| 727 | SYK       | -1.844568378 |
| 728 | PC326     | -1.844071735 |
| 729 | ASK       | -1.843867452 |
| 730 | FLJ20699  | -1.842941088 |
| 731 | LOC51333  | -1.842556899 |
| 732 | URKL1     | -1.841930127 |
| 733 | TRIT1     | -1.841899676 |
| 734 | CYCS      | -1.841651071 |
| 735 | PDE2A     | -1.841130568 |
| 736 | LGR5      | -1.84080595  |
| 737 | CLEC2L    | -1.840251696 |
| 738 | SLC39A9   | -1.840115268 |
| 739 | SORBS3    | -1.839870142 |
| 740 | TRDN      | -1.839788581 |
| 741 | CYP24A1   | -1.839461374 |
| 742 | DUSP18    | -1.83941989  |
| 743 | SERPINF1  | -1.838873469 |
| 744 | GOT1      | -1.838363039 |
| 745 | PSMC4     | -1.837798985 |
| 746 | PRKY      | -1.837682088 |
| 747 | KNTC2     | -1.837575592 |
| 748 | CAMK1     | -1.837356952 |



|     |                   |              |
|-----|-------------------|--------------|
| 749 | <i>PPFIBP2</i>    | -1.836900383 |
| 750 | <i>RHBDF1</i>     | -1.836773579 |
| 751 | <i>CARS</i>       | -1.836641307 |
| 752 | <i>SKP2</i>       | -1.836587005 |
| 753 | <i>SLC26A4</i>    | -1.836415002 |
| 754 | <i>LOC56270</i>   | -1.835997866 |
| 755 | <i>CBFA2T2</i>    | -1.835932451 |
| 756 | <i>KRTAP18-11</i> | -1.835888363 |
| 757 | <i>TAF13</i>      | -1.835852493 |
| 758 | <i>PTTG1IP</i>    | -1.835558647 |
| 759 | <i>MS4A6E</i>     | -1.835527472 |
| 760 | <i>DVL3</i>       | -1.835508469 |
| 761 | <i>CPB1</i>       | -1.835311545 |
| 762 | <i>CLSTN2</i>     | -1.835126906 |
| 763 | <i>FLJ43374</i>   | -1.834907561 |
| 764 | <i>FBXL5</i>      | -1.834408517 |
| 765 | <i>MGC13159</i>   | -1.834386512 |
| 766 | <i>MGC35033</i>   | -1.834307684 |
| 767 | <i>DUB3</i>       | -1.833673065 |
| 768 | <i>ADORA2B</i>    | -1.833335329 |
| 769 | <i>LOC340542</i>  | -1.832955114 |
| 770 | <i>EIF3S10</i>    | -1.83291992  |
| 771 | <i>EIF3S7</i>     | -1.832897207 |
| 772 | <i>KIAA1328</i>   | -1.832567351 |
| 773 | <i>C19ORF27</i>   | -1.832553696 |
| 774 | <i>SYNCRIP</i>    | -1.832277504 |
| 775 | <i>SSRP1</i>      | -1.831606965 |
| 776 | <i>CDC20</i>      | -1.831349905 |
| 777 | <i>COL3A1</i>     | -1.83082819  |
| 778 | <i>C5R1</i>       | -1.830573537 |
| 779 | <i>OVCA2</i>      | -1.830567888 |
| 780 | <i>KRTAP4-10</i>  | -1.829534338 |
| 781 | <i>MTRF1</i>      | -1.829174881 |
| 782 | <i>MDS006</i>     | -1.828982686 |
| 783 | <i>PCSK1N</i>     | -1.828837282 |
| 784 | <i>NME3</i>       | -1.828012465 |
| 785 | <i>STCH</i>       | -1.82773402  |
| 786 | <i>JMJD4</i>      | -1.827499343 |
| 787 | <i>HOXD1</i>      | -1.827371434 |
| 788 | <i>SERPINB6</i>   | -1.82736166  |
| 789 | <i>MICAL2</i>     | -1.826634219 |
| 790 | <i>MBNL1</i>      | -1.826633498 |
| 791 | <i>LOC144501</i>  | -1.826110864 |
| 792 | <i>SSX4B</i>      | -1.826097608 |
| 793 | <i>C3ORF10</i>    | -1.825685969 |
| 794 | <i>CRELD1</i>     | -1.825650075 |
| 795 | <i>MAL2</i>       | -1.825483994 |

|     |               |              |
|-----|---------------|--------------|
| 796 | MAPK1         | -1.824315541 |
| 797 | PRKAG3        | -1.823985351 |
| 798 | CTSC          | -1.822689711 |
| 799 | KIAA0998      | -1.822104991 |
| 800 | FGL2          | -1.8219527   |
| 801 | RP6-166C19.9  | -1.821872103 |
| 802 | TKTL1         | -1.821490659 |
| 803 | ADRA1D        | -1.821463418 |
| 804 | IFRG15        | -1.821430563 |
| 805 | BTBD9         | -1.821177948 |
| 806 | MGC3196       | -1.821136925 |
| 807 | PRPF39        | -1.82048004  |
| 808 | LOC90342      | -1.820280212 |
| 809 | RPH3A         | -1.820100869 |
| 810 | GJB5          | -1.819971323 |
| 811 | LOC196541     | -1.819702198 |
| 812 | CPVL          | -1.818699132 |
| 813 | LOC201895     | -1.818555117 |
| 814 | ARAF1         | -1.81845731  |
| 815 | NUP107        | -1.818121078 |
| 816 | F8A3          | -1.818008846 |
| 817 | XPO5          | -1.81790668  |
| 818 | OR11L1        | -1.817804998 |
| 819 | FLJ22054      | -1.817126825 |
| 820 | TRPM3         | -1.8167819   |
| 821 | FRAP1         | -1.816672856 |
| 822 | SSX4          | -1.816556291 |
| 823 | LOC129521     | -1.816443844 |
| 824 | LOC221710     | -1.815700984 |
| 825 | FLJ14566      | -1.815677878 |
| 826 | LOC92691      | -1.815238289 |
| 827 | ZNF616        | -1.815015119 |
| 828 | RPS3          | -1.814794664 |
| 829 | FADS1         | -1.814276641 |
| 830 | TUBG1         | -1.814151893 |
| 831 | FLJ23074      | -1.813943667 |
| 832 | C10ORF83      | -1.813351194 |
| 833 | RP11-159H20.4 | -1.813266771 |
| 834 | KLK12         | -1.812931433 |
| 835 | FLJ10324      | -1.812899402 |
| 836 | VPS39         | -1.812394979 |
| 837 | PROSC         | -1.812280107 |
| 838 | OR1L1         | -1.812217455 |
| 839 | AURKA         | -1.812163317 |
| 840 | MGC52498      | -1.811978372 |
| 841 | DKFZP564C186  | -1.811444616 |
| 842 | NR3C1         | -1.811386158 |

|     |                  |              |
|-----|------------------|--------------|
| 843 | <i>ALS2CR8</i>   | -1.811386158 |
| 844 | <i>K-ALPHA-1</i> | -1.811310037 |
| 845 | <i>WDR67</i>     | -1.811214883 |
| 846 | <i>IRTA2</i>     | -1.810466866 |
| 847 | <i>SYNPR</i>     | -1.810142113 |
| 848 | <i>TAZ</i>       | -1.809490475 |
| 849 | <i>GDF10</i>     | -1.808676817 |
| 850 | <i>FLJ32447</i>  | -1.808651636 |
| 851 | <i>LOC387775</i> | -1.808529403 |
| 852 | <i>FLJ25200</i>  | -1.808201508 |
| 853 | <i>KCNJ15</i>    | -1.807816625 |
| 854 | <i>OLFML3</i>    | -1.807740509 |
| 855 | <i>PSMB4</i>     | -1.807372425 |
| 856 | <i>C6ORF130</i>  | -1.807354213 |
| 857 | <i>DNAJC12</i>   | -1.807332192 |
| 858 | <i>PAGE-5</i>    | -1.806370975 |
| 859 | <i>USP7</i>      | -1.805982673 |
| 860 | <i>SLC35D2</i>   | -1.805821101 |
| 861 | <i>SLC5A2</i>    | -1.805598385 |
| 862 | <i>CPNE6</i>     | -1.805432518 |
| 863 | <i>UMPK</i>      | -1.805192153 |
| 864 | <i>ULK1</i>      | -1.805074213 |
| 865 | <i>RNF149</i>    | -1.804837947 |
| 866 | <i>ATP6V1G1</i>  | -1.804131936 |
| 867 | <i>C20ORF144</i> | -1.803970499 |
| 868 | <i>MGC33367</i>  | -1.803712293 |
| 869 | <i>CTSF</i>      | -1.803548433 |
| 870 | <i>TRIM43</i>    | -1.803300574 |
| 871 | <i>EIF3S9</i>    | -1.802883961 |
| 872 | <i>LOC339456</i> | -1.802459432 |
| 873 | <i>C20ORF65</i>  | -1.802350215 |
| 874 | <i>ASB12</i>     | -1.802245812 |
| 875 | <i>KIAA1604</i>  | -1.802073233 |
| 876 | <i>MOBK1B</i>    | -1.800585272 |
| 877 | <i>FN5</i>       | -1.800165519 |
| 878 | <i>NEDD5</i>     | -1.800124896 |
| 879 | <i>PDE6D</i>     | -1.800026118 |
| 880 | <i>ACYP2</i>     | -1.799973218 |
| 881 | <i>MTAP</i>      | -1.799896678 |
| 882 | <i>ELOVL5</i>    | -1.799816544 |
| 883 | <i>IL1A</i>      | -1.799763068 |
| 884 | <i>HBLD1</i>     | -1.798549981 |
| 885 | <i>ATP11B</i>    | -1.798510222 |
| 886 | <i>GJA10</i>     | -1.798381745 |
| 887 | <i>FLJ12666</i>  | -1.798201043 |
| 888 | <i>KRT24</i>     | -1.798179007 |
| 889 | <i>CCS</i>       | -1.798058884 |

|     |                     |              |
|-----|---------------------|--------------|
| 890 | <i>EDN1</i>         | -1.796594679 |
| 891 | <i>CSK</i>          | -1.796390609 |
| 892 | <i>F12</i>          | -1.796320925 |
| 893 | <i>ALDH3B1</i>      | -1.796304276 |
| 894 | <i>TORC3</i>        | -1.796152017 |
| 895 | <i>NUMA1</i>        | -1.794928781 |
| 896 | <i>CITED2</i>       | -1.794927694 |
| 897 | <i>CKS2</i>         | -1.79490064  |
| 898 | <i>LOC90167</i>     | -1.794869534 |
| 899 | <i>MBC2</i>         | -1.794379589 |
| 900 | <i>ASC</i>          | -1.794251761 |
| 901 | <i>NRIP3</i>        | -1.79414757  |
| 902 | <i>USP36</i>        | -1.793930496 |
| 903 | <i>PRDM10</i>       | -1.793910595 |
| 904 | <i>KIAA1404</i>     | -1.793523482 |
| 905 | <i>CASP1</i>        | -1.793425467 |
| 906 | <i>C1orf151</i>     | -1.793423867 |
| 907 | <i>ERBB2</i>        | -1.793281386 |
| 908 | <i>RGC32</i>        | -1.793214599 |
| 909 | <i>ZNF408</i>       | -1.793182714 |
| 910 | <i>KBTBD1</i>       | -1.793005719 |
| 911 | <i>MMAB</i>         | -1.792312438 |
| 912 | <i>RP6-166C19.1</i> | -1.792098795 |
| 913 | <i>TNP2</i>         | -1.791572178 |
| 914 | <i>BUB1</i>         | -1.791494444 |
| 915 | <i>PLCG1</i>        | -1.791130186 |
| 916 | <i>CGI-127</i>      | -1.790599103 |
| 917 | <i>LOC374569</i>    | -1.790509528 |
| 918 | <i>SEMA4F</i>       | -1.79037216  |
| 919 | <i>HMGN1</i>        | -1.790206225 |
| 920 | <i>MSLN</i>         | -1.790077131 |
| 921 | <i>ZNF311</i>       | -1.789931092 |
| 922 | <i>IDI1</i>         | -1.788349817 |
| 923 | <i>FLJ21816</i>     | -1.788019285 |
| 924 | <i>ZSWIM1</i>       | -1.787757721 |
| 925 | <i>HTF9C</i>        | -1.787702113 |
| 926 | <i>SGKL</i>         | -1.787697665 |
| 927 | <i>FLJ22318</i>     | -1.787138891 |
| 928 | <i>EIF2B2</i>       | -1.785838019 |
| 929 | <i>FLJ10634</i>     | -1.78565666  |
| 930 | <i>MAPK8IP1</i>     | -1.785160805 |
| 931 | <i>RPN1</i>         | -1.785153969 |
| 932 | <i>TIMM8A</i>       | -1.785142281 |
| 933 | <i>TNPO1</i>        | -1.784768207 |
| 934 | <i>RPP38</i>        | -1.784702864 |
| 935 | <i>TIGD1</i>        | -1.784284125 |
| 936 | <i>KIAA1086</i>     | -1.784257889 |

|     |               |              |
|-----|---------------|--------------|
| 937 | NFASC         | -1.784105141 |
| 938 | ZNF226        | -1.782697145 |
| 939 | FLJ30058      | -1.782431645 |
| 940 | DKFZP727A071  | -1.782300569 |
| 941 | CCT4          | -1.782066996 |
| 942 | TTRAP         | -1.781374468 |
| 943 | MAP3K12       | -1.781260142 |
| 944 | TUBGCP6       | -1.780947683 |
| 945 | GK            | -1.780745373 |
| 946 | PIK3R4        | -1.780007754 |
| 947 | BARD1         | -1.779626457 |
| 948 | CARF          | -1.77956453  |
| 949 | PKIA          | -1.77862242  |
| 950 | SNAPC1        | -1.778224891 |
| 951 | RABIF         | -1.778131049 |
| 952 | KIAA1982      | -1.777751842 |
| 953 | MGC4655       | -1.777594521 |
| 954 | LMOD1         | -1.777538148 |
| 955 | MPN           | -1.776634057 |
| 956 | GRK4          | -1.776329971 |
| 957 | STAC          | -1.776029609 |
| 958 | RBM7          | -1.77576057  |
| 959 | DKFZP434K1421 | -1.775702314 |
| 960 | C13ORF12      | -1.775543095 |
| 961 | PLCD3         | -1.775156114 |
| 962 | COPB          | -1.774372499 |
| 963 | C14ORF149     | -1.77412997  |
| 964 | FLJ22344      | -1.774094125 |
| 965 | IL17F         | -1.774022806 |
| 966 | WDR33         | -1.773928382 |
| 967 | POLR3D        | -1.773889621 |
| 968 | KIAA0564      | -1.773874318 |
| 969 | RALB          | -1.773103826 |
| 970 | PCCB          | -1.772964597 |
| 971 | PACSIN1       | -1.772819359 |
| 972 | OR2L2         | -1.772145678 |
| 973 | FBXO16        | -1.771905535 |
| 974 | SNAG1         | -1.771605055 |
| 975 | NDUFA10       | -1.771499396 |
| 976 | TTC5          | -1.770946332 |
| 977 | C7ORF31       | -1.770889167 |
| 978 | TM4SF2        | -1.770883213 |
| 979 | ETV4          | -1.770644044 |
| 980 | NRIP1         | -1.770436319 |
| 981 | CGI-49        | -1.770382411 |
| 982 | ASB6          | -1.770238487 |
| 983 | ZNF36         | -1.770213082 |

|       |                  |              |
|-------|------------------|--------------|
| 984   | <i>BRUNOL5</i>   | -1.769855769 |
| 985   | <i>FAM20B</i>    | -1.769701458 |
| 986   | <i>PSMD9</i>     | -1.769385871 |
| 987   | <i>GPR15</i>     | -1.7690778   |
| 988   | <i>CISH</i>      | -1.768904848 |
| 989   | <i>LOC149297</i> | -1.768542767 |
| 990   | <i>FOXD4L3</i>   | -1.768464799 |
| 991   | <i>NPR3</i>      | -1.76835432  |
| 992   | <i>NIT1</i>      | -1.768004856 |
| 993   | <i>ABCA5</i>     | -1.767567397 |
| 994   | <i>CCT7</i>      | -1.767483995 |
| 995   | <i>MAP3K2</i>    | -1.767451956 |
| 996   | <i>FNBP1</i>     | -1.766528289 |
| 997   | <i>PACAP</i>     | -1.765958065 |
| 998   | <i>RHBG</i>      | -1.765801404 |
| 999   | <i>KRT13</i>     | -1.765024936 |
| 1,000 | <i>S100A8</i>    | -1.763791873 |
| 1,001 | <i>SLC17A7</i>   | -1.763555912 |
| 1,002 | <i>CYFIP1</i>    | -1.763412155 |
| 1,003 | <i>CDT1</i>      | -1.762677366 |
| 1,004 | <i>ADAMTSL3</i>  | -1.76238136  |
| 1,005 | <i>SLAC2-B</i>   | -1.762228551 |
| 1,006 | <i>GC20</i>      | -1.762029972 |
| 1,007 | <i>SLC38A1</i>   | -1.761768208 |
| 1,008 | <i>LOC144097</i> | -1.761551794 |
| 1,009 | <i>PRKAB1</i>    | -1.761033502 |
| 1,010 | <i>TNFRSF10D</i> | -1.760705322 |
| 1,011 | <i>MAD2L1</i>    | -1.760650951 |
| 1,012 | <i>EEF1B2</i>    | -1.760520411 |
| 1,013 | <i>EVER2</i>     | -1.76038611  |
| 1,014 | <i>TMEM7</i>     | -1.759983281 |
| 1,015 | <i>ZBED1</i>     | -1.759930495 |
| 1,016 | <i>FBXL13</i>    | -1.759902788 |
| 1,017 | <i>CGB2</i>      | -1.759878282 |
| 1,018 | <i>FLJ36812</i>  | -1.759848616 |
| 1,019 | <i>TP53I11</i>   | -1.759819188 |
| 1,020 | <i>PCYT1A</i>    | -1.759471248 |
| 1,021 | <i>FLJ36525</i>  | -1.759148965 |
| 1,022 | <i>GPR42</i>     | -1.758759272 |
| 1,023 | <i>CLCN3</i>     | -1.758754773 |
| 1,024 | <i>OR5L1</i>     | -1.75868154  |
| 1,025 | <i>TAAR1</i>     | -1.758211469 |
| 1,026 | <i>RAC3</i>      | -1.758051322 |
| 1,027 | <i>MGC71993</i>  | -1.757774745 |
| 1,028 | <i>FLJ40089</i>  | -1.757531785 |
| 1,029 | <i>C6ORF21</i>   | -1.757456538 |
| 1,030 | <i>KRT8</i>      | -1.757341127 |

|       |                  |              |
|-------|------------------|--------------|
| 1,031 | <i>OAZIN</i>     | -1.756710977 |
| 1,032 | <i>OR10A6</i>    | -1.756279771 |
| 1,033 | <i>IRX3</i>      | -1.756190856 |
| 1,034 | <i>CAPN12</i>    | -1.755767388 |
| 1,035 | <i>C2F</i>       | -1.75538501  |
| 1,036 | <i>HMGA2</i>     | -1.755155254 |
| 1,037 | <i>KIAA1324</i>  | -1.75460448  |
| 1,038 | <i>KMO</i>       | -1.75437274  |
| 1,039 | <i>PCTK1</i>     | -1.754079884 |
| 1,040 | <i>LOC168850</i> | -1.753856129 |
| 1,041 | <i>WSB2</i>      | -1.753568005 |
| 1,042 | <i>FRMD3</i>     | -1.753406708 |
| 1,043 | <i>SAA4</i>      | -1.753370727 |
| 1,044 | <i>SMC2L1</i>    | -1.753357497 |
| 1,045 | <i>ZFP91</i>     | -1.753266617 |
| 1,046 | <i>GREM2</i>     | -1.753131624 |
| 1,047 | <i>PTPRJ</i>     | -1.752925829 |
| 1,048 | <i>AK5</i>       | -1.752545975 |
| 1,049 | <i>RAD51</i>     | -1.752482199 |
| 1,050 | <i>MGC16169</i>  | -1.752424377 |
| 1,051 | <i>WNT9A</i>     | -1.75210285  |
| 1,052 | <i>MAGEC1</i>    | -1.751993702 |
| 1,053 | <i>MIR16</i>     | -1.751981342 |
| 1,054 | <i>PSMA2</i>     | -1.751662361 |
| 1,055 | <i>FGF11</i>     | -1.750900223 |
| 1,056 | <i>IL1F8</i>     | -1.750340214 |
| 1,057 | <i>EIF2B5</i>    | -1.749738225 |
| 1,058 | <i>KIAA0478</i>  | -1.749678377 |
| 1,059 | <i>LOC163223</i> | -1.749488288 |
| 1,060 | <i>FLJ33516</i>  | -1.749366529 |
| 1,061 | <i>ADPRTL3</i>   | -1.749227407 |
| 1,062 | <i>CXCL6</i>     | -1.74884144  |
| 1,063 | <i>FLJ90119</i>  | -1.748785034 |
| 1,064 | <i>PSMA6</i>     | -1.748600241 |
| 1,065 | <i>CUEDC1</i>    | -1.748595509 |
| 1,066 | <i>LOC401494</i> | -1.748502496 |
| 1,067 | <i>RGS5</i>      | -1.748113961 |
| 1,068 | <i>ADAMTS17</i>  | -1.748076341 |
| 1,069 | <i>LYRIC</i>     | -1.748066107 |
| 1,070 | <i>MGC35295</i>  | -1.748065335 |
| 1,071 | <i>YBX2</i>      | -1.747792274 |
| 1,072 | <i>SPG6</i>      | -1.747659642 |
| 1,073 | <i>GPR88</i>     | -1.747518118 |
| 1,074 | <i>LOC388730</i> | -1.747418351 |
| 1,075 | <i>NTRK1</i>     | -1.747365695 |
| 1,076 | <i>WBSCR28</i>   | -1.746586389 |
| 1,077 | <i>MGC16733</i>  | -1.746576418 |

|       |                      |              |
|-------|----------------------|--------------|
| 1,078 | <i>SPATA2</i>        | -1.746521477 |
| 1,079 | <i>NYD-SP25</i>      | -1.745846206 |
| 1,080 | <i>RPL13A</i>        | -1.745795735 |
| 1,081 | <i>OLR1</i>          | -1.745404489 |
| 1,082 | <i>WBSCR24</i>       | -1.745086603 |
| 1,083 | <i>DTX3</i>          | -1.744718239 |
| 1,084 | <i>SFPQ</i>          | -1.744645157 |
| 1,085 | <i>EWSR1</i>         | -1.744556258 |
| 1,086 | <i>ANXA13</i>        | -1.744302258 |
| 1,087 | <i>SPAS1</i>         | -1.744266773 |
| 1,088 | <i>GSR</i>           | -1.743993819 |
| 1,089 | <i>C10ORF38</i>      | -1.743936418 |
| 1,090 | <i>LOC345557</i>     | -1.74387981  |
| 1,091 | <i>SLC28A3</i>       | -1.74362984  |
| 1,092 | <i>BMP2</i>          | -1.74324986  |
| 1,093 | <i>KLF4</i>          | -1.743132596 |
| 1,094 | <i>FLJ21657</i>      | -1.742604085 |
| 1,095 | <i>CAMK2B</i>        | -1.742548158 |
| 1,096 | <i>TGM6</i>          | -1.742496541 |
| 1,097 | <i>DKFZP434H132</i>  | -1.742432545 |
| 1,098 | <i>DKFZP566M1046</i> | -1.742302693 |
| 1,099 | <i>HSF1</i>          | -1.742257311 |
| 1,100 | <i>ZNF30</i>         | -1.741823877 |
| 1,101 | <i>MATN2</i>         | -1.741800986 |
| 1,102 | <i>FGFR1</i>         | -1.741460077 |
| 1,103 | <i>C9ORF100S</i>     | -1.741355185 |
| 1,104 | <i>CHI3L1</i>        | -1.740863797 |
| 1,105 | <i>CAV2</i>          | -1.740597879 |
| 1,106 | <i>MGC14798</i>      | -1.740528278 |
| 1,107 | <i>PTBP1</i>         | -1.740218101 |
| 1,108 | <i>DUSP23</i>        | -1.74009189  |
| 1,109 | <i>SLC2A9</i>        | -1.739995988 |
| 1,110 | <i>ECM1</i>          | -1.739981489 |
| 1,111 | <i>DOCK4</i>         | -1.739976853 |
| 1,112 | <i>PFKFB1</i>        | -1.738926809 |
| 1,113 | <i>STK16</i>         | -1.738744773 |
| 1,114 | <i>WNT4</i>          | -1.738721154 |
| 1,115 | <i>TUBA6</i>         | -1.73865857  |
| 1,116 | <i>DPP4</i>          | -1.738348077 |
| 1,117 | <i>TXNDC11</i>       | -1.738090585 |
| 1,118 | <i>KIAA0961</i>      | -1.738080648 |
| 1,119 | <i>USP39</i>         | -1.737750987 |
| 1,120 | <i>DNAJC1</i>        | -1.737544127 |
| 1,121 | <i>FLJ20291</i>      | -1.737118721 |
| 1,122 | <i>FLJ10154</i>      | -1.737045185 |
| 1,123 | <i>PAPD4</i>         | -1.736746888 |
| 1,124 | <i>ZNF101</i>        | -1.736499688 |



|       |                      |              |
|-------|----------------------|--------------|
| 1,125 | <i>GOLGA8B</i>       | -1.736466175 |
| 1,126 | <i>LOC112703</i>     | -1.735957233 |
| 1,127 | <i>PGAM1</i>         | -1.735299645 |
| 1,128 | <i>WWP1</i>          | -1.735193547 |
| 1,129 | <i>SPEC1</i>         | -1.733686752 |
| 1,130 | <i>YTHDC2</i>        | -1.733660984 |
| 1,131 | <i>DKFZP667G2110</i> | -1.733630423 |
| 1,132 | <i>MGC33947</i>      | -1.733507874 |
| 1,133 | <i>CCRL1</i>         | -1.733139746 |
| 1,134 | <i>CNNM2</i>         | -1.732910204 |
| 1,135 | <i>SORCS3</i>        | -1.732903836 |
| 1,136 | <i>LMAN1</i>         | -1.732866928 |
| 1,137 | <i>PDGFRL</i>        | -1.732416177 |
| 1,138 | <i>GUCY2F</i>        | -1.732396192 |
| 1,139 | <i>FLJ13150</i>      | -1.732291925 |
| 1,140 | <i>FLT4</i>          | -1.732284675 |
| 1,141 | <i>OR51L1</i>        | -1.732230785 |
| 1,142 | <i>ARG2</i>          | -1.732221273 |
| 1,143 | <i>STRN4</i>         | -1.731970259 |
| 1,144 | <i>CALM2</i>         | -1.731962294 |
| 1,145 | <i>RAB13</i>         | -1.73115957  |
| 1,146 | <i>ATP6V0C</i>       | -1.730672933 |
| 1,147 | <i>ZBTB38</i>        | -1.730583461 |
| 1,148 | <i>KCTD13</i>        | -1.730529779 |
| 1,149 | <i>MEP1A</i>         | -1.730340648 |
| 1,150 | <i>C14ORF123</i>     | -1.730168449 |
| 1,151 | <i>CGB5</i>          | -1.729195498 |
| 1,152 | <i>LAP3</i>          | -1.728909783 |
| 1,153 | <i>FLJ36031</i>      | -1.728827814 |
| 1,154 | <i>HCA66</i>         | -1.72849607  |
| 1,155 | <i>SATB2</i>         | -1.728394385 |
| 1,156 | <i>C20ORF40</i>      | -1.727621317 |
| 1,157 | <i>SLITRK4</i>       | -1.727483813 |
| 1,158 | <i>FLJ13868</i>      | -1.727459902 |
| 1,159 | <i>DRCTNNB1A</i>     | -1.727119425 |
| 1,160 | <i>RPL24</i>         | -1.726943302 |
| 1,161 | <i>ASB11</i>         | -1.726895233 |
| 1,162 | <i>SH3GL1</i>        | -1.726769599 |
| 1,163 | <i>TCIRG1</i>        | -1.726246824 |
| 1,164 | <i>ARPM1</i>         | -1.72624024  |
| 1,165 | <i>RHOB</i>          | -1.726033072 |
| 1,166 | <i>U2AF1L3</i>       | -1.725999442 |
| 1,167 | <i>LCN7</i>          | -1.725294435 |
| 1,168 | <i>C6ORF162</i>      | -1.725189061 |
| 1,169 | <i>NLN</i>           | -1.725187035 |
| 1,170 | <i>FLJ33167</i>      | -1.72506296  |
| 1,171 | <i>LOC132430</i>     | -1.725043883 |

|       |                      |              |
|-------|----------------------|--------------|
| 1,172 | <i>TNKS</i>          | -1.725042847 |
| 1,173 | <i>CXORF26</i>       | -1.724640262 |
| 1,174 | <i>BC-2</i>          | -1.724617746 |
| 1,175 | <i>SLC39A10</i>      | -1.723924117 |
| 1,176 | <i>PIP5K3</i>        | -1.723871351 |
| 1,177 | <i>CTSZ</i>          | -1.723665455 |
| 1,178 | <i>GRPR</i>          | -1.723650127 |
| 1,179 | <i>SI</i>            | -1.723386155 |
| 1,180 | <i>STAF65(GAMMA)</i> | -1.723210593 |
| 1,181 | <i>RPS7</i>          | -1.723068639 |
| 1,182 | <i>TNFSF14</i>       | -1.722745802 |
| 1,183 | <i>PCBP4</i>         | -1.722429346 |
| 1,184 | <i>HMG2L1</i>        | -1.722041287 |
| 1,185 | <i>LOC157697</i>     | -1.721934403 |
| 1,186 | <i>SEC63</i>         | -1.721715313 |
| 1,187 | <i>ZMAT4</i>         | -1.721517348 |
| 1,188 | <i>CXCL10</i>        | -1.721123162 |
| 1,189 | <i>GFRA4</i>         | -1.721112155 |
| 1,190 | <i>CAMK2A</i>        | -1.720892421 |
| 1,191 | <i>IL10RA</i>        | -1.720498255 |
| 1,192 | <i>PIM3</i>          | -1.719782215 |
| 1,193 | <i>KIAA1536</i>      | -1.719264419 |
| 1,194 | <i>HERC6</i>         | -1.718955819 |
| 1,195 | <i>LIPC</i>          | -1.718718195 |
| 1,196 | <i>PTPNS1L2</i>      | -1.718562871 |
| 1,197 | <i>MAP1LC3B</i>      | -1.718394844 |
| 1,198 | <i>KAL1</i>          | -1.718027278 |
| 1,199 | <i>C10ORF28</i>      | -1.71785381  |
| 1,200 | <i>GPR84</i>         | -1.717819669 |
| 1,201 | <i>NTNG1</i>         | -1.717654157 |
| 1,202 | <i>MAEA</i>          | -1.717137508 |
| 1,203 | <i>SF3B1</i>         | -1.717097606 |
| 1,204 | <i>AB026190</i>      | -1.716907868 |
| 1,205 | <i>FLJ16478</i>      | -1.716665135 |
| 1,206 | <i>MGST3</i>         | -1.716436046 |
| 1,207 | <i>HHL</i>           | -1.715956342 |
| 1,208 | <i>LOC643226</i>     | -1.715442133 |
| 1,209 | <i>APOL5</i>         | -1.71535222  |
| 1,210 | <i>CCL3L1</i>        | -1.715134509 |
| 1,211 | <i>SIRT3</i>         | -1.714926557 |
| 1,212 | <i>CDC2L5</i>        | -1.714548482 |
| 1,213 | <i>PCDH12</i>        | -1.714541105 |
| 1,214 | <i>ZNF619</i>        | -1.714082469 |
| 1,215 | <i>NHS</i>           | -1.713554003 |
| 1,216 | <i>JMJD5</i>         | -1.713495809 |
| 1,217 | <i>PCDHB5</i>        | -1.713409799 |
| 1,218 | <i>PCDHB5</i>        | -1.713409799 |

|       |                     |              |
|-------|---------------------|--------------|
| 1,219 | <i>H1FOO</i>        | -1.713323237 |
| 1,220 | <i>GOLGA2</i>       | -1.713304306 |
| 1,221 | <i>IL19</i>         | -1.713304306 |
| 1,222 | <i>SSPN</i>         | -1.713293206 |
| 1,223 | <i>GRCC10</i>       | -1.71315497  |
| 1,224 | <i>SEPT1</i>        | -1.712906549 |
| 1,225 | <i>SNRPF</i>        | -1.712595731 |
| 1,226 | <i>GNAI1</i>        | -1.712587904 |
| 1,227 | <i>RNP24</i>        | -1.71255641  |
| 1,228 | <i>MGP</i>          | -1.712479323 |
| 1,229 | <i>FLJ37131</i>     | -1.712433088 |
| 1,230 | <i>IER3IP1</i>      | -1.712211581 |
| 1,231 | <i>PSG11</i>        | -1.712184492 |
| 1,232 | <i>NME5</i>         | -1.711894644 |
| 1,233 | <i>KRT1B</i>        | -1.711784264 |
| 1,234 | <i>CKAP5</i>        | -1.71162691  |
| 1,235 | <i>KCNH6</i>        | -1.711614744 |
| 1,236 | <i>BTBD14A</i>      | -1.711594953 |
| 1,237 | <i>ASB10</i>        | -1.711466576 |
| 1,238 | <i>LOC91272</i>     | -1.711256057 |
| 1,239 | <i>HCFC2</i>        | -1.711168114 |
| 1,240 | <i>LOC285331</i>    | -1.710849695 |
| 1,241 | <i>VWF</i>          | -1.71083447  |
| 1,242 | <i>HNT</i>          | -1.710605879 |
| 1,243 | <i>DAB2</i>         | -1.710551965 |
| 1,244 | <i>CAMKK1</i>       | -1.710385273 |
| 1,245 | <i>STRN3</i>        | -1.710375197 |
| 1,246 | <i>EEF1E1</i>       | -1.71027041  |
| 1,247 | <i>TDE2</i>         | -1.710169048 |
| 1,248 | <i>DKFZP564B167</i> | -1.709758628 |
| 1,249 | <i>PP</i>           | -1.709597411 |
| 1,250 | <i>PIK3R2</i>       | -1.709314009 |
| 1,251 | <i>C9ORF3</i>       | -1.709168575 |
| 1,252 | <i>EMCN</i>         | -1.709159574 |
| 1,253 | <i>SLC26A6</i>      | -1.708986416 |
| 1,254 | <i>FLJ39061</i>     | -1.708958359 |
| 1,255 | <i>CDIPT</i>        | -1.708844037 |
| 1,256 | <i>DPP7</i>         | -1.708449649 |
| 1,257 | <i>ZNF452</i>       | -1.708324522 |
| 1,258 | <i>RPS10</i>        | -1.708275273 |
| 1,259 | <i>ADP-GK</i>       | -1.707750873 |
| 1,260 | <i>KIAA1949</i>     | -1.70753612  |
| 1,261 | <i>MYL9</i>         | -1.707304004 |
| 1,262 | <i>RASAL2</i>       | -1.707297779 |
| 1,263 | <i>LOC124220</i>    | -1.70723625  |
| 1,264 | <i>FAM14A</i>       | -1.70684523  |
| 1,265 | <i>DONSON</i>       | -1.706838216 |

|       |                 |              |
|-------|-----------------|--------------|
| 1,266 | <i>ETV6</i>     | -1.706752317 |
| 1,267 | <i>CHORDC1</i>  | -1.706518442 |
| 1,268 | <i>KCNJ6</i>    | -1.706405323 |
| 1,269 | <i>EOS</i>      | -1.706157204 |
| 1,270 | <i>FLJ13215</i> | -1.705901842 |
| 1,271 | <i>ADH1A</i>    | -1.705457717 |
| 1,272 | <i>MYO9A</i>    | -1.70525864  |
| 1,273 | <i>KLRG1</i>    | -1.704667773 |
| 1,274 | <i>FCRH3</i>    | -1.704531724 |
| 1,275 | <i>BCLAF1</i>   | -1.704453694 |
| 1,276 | <i>MGC26690</i> | -1.704443297 |
| 1,277 | <i>BPI</i>      | -1.704310535 |
| 1,278 | <i>MTNR1B</i>   | -1.703964666 |
| 1,279 | <i>MGC5508</i>  | -1.703747113 |
| 1,280 | <i>RAD17</i>    | -1.703559309 |
| 1,281 | <i>DACT2</i>    | -1.703542612 |
| 1,282 | <i>RORC</i>     | -1.703256002 |
| 1,283 | <i>ADD3</i>     | -1.70317077  |
| 1,284 | <i>MGC4189</i>  | -1.702983891 |
| 1,285 | <i>MT1F</i>     | -1.702801836 |
| 1,286 | <i>RAB9P40</i>  | -1.702571774 |
| 1,287 | <i>SLC11A2</i>  | -1.702459089 |
| 1,288 | <i>FLJ90652</i> | -1.702220619 |
| 1,289 | <i>SH3PX3</i>   | -1.702118161 |
| 1,290 | <i>RPS6KB1</i>  | -1.702052314 |
| 1,291 | <i>ITPA</i>     | -1.702046171 |
| 1,292 | <i>BSG</i>      | -1.701839879 |
| 1,293 | <i>TGOLN2</i>   | -1.701565691 |
| 1,294 | <i>ANXA1</i>    | -1.701563095 |
| 1,295 | <i>AP1M1</i>    | -1.701519949 |
| 1,296 | <i>E2IG4</i>    | -1.701046484 |
| 1,297 | <i>NMES1</i>    | -1.700181715 |
| 1,298 | <i>LOC51315</i> | -1.700146471 |
| 1,299 | <i>PKIB</i>     | -1.700099546 |
| 1,300 | <i>HUMMLC2B</i> | -1.700098087 |
| 1,301 | <i>TREH</i>     | -1.699495376 |
| 1,302 | <i>MGC5395</i>  | -1.699399401 |
| 1,303 | <i>GLG1</i>     | -1.699241943 |
| 1,304 | <i>C14ORF45</i> | -1.69914827  |
| 1,305 | <i>C9ORF26</i>  | -1.698699205 |
| 1,306 | <i>CRIM1</i>    | -1.698697362 |
| 1,307 | <i>USP28</i>    | -1.698178981 |
| 1,308 | <i>WT1</i>      | -1.698157141 |
| 1,309 | <i>E2F3</i>     | -1.69806908  |
| 1,310 | <i>IL28A</i>    | -1.697827438 |
| 1,311 | <i>SMAD9</i>    | -1.697766134 |
| 1,312 | <i>FLJ25369</i> | -1.697726771 |

|       |                  |              |
|-------|------------------|--------------|
| 1,313 | <i>C14ORF130</i> | -1.697638879 |
| 1,314 | <i>KIAA1815</i>  | -1.696970745 |
| 1,315 | <i>C21ORF6</i>   | -1.69679327  |
| 1,316 | <i>TAF4B</i>     | -1.696774735 |
| 1,317 | <i>FLJ37440</i>  | -1.696769457 |
| 1,318 | <i>DERPC</i>     | -1.696565867 |
| 1,319 | <i>PCDH1</i>     | -1.695893385 |
| 1,320 | <i>PCDH11Y</i>   | -1.695859308 |
| 1,321 | <i>CASP2</i>     | -1.695784705 |
| 1,322 | <i>ATF7IP</i>    | -1.695732086 |
| 1,323 | <i>MGC5306</i>   | -1.695699401 |
| 1,324 | <i>CD33L3</i>    | -1.695448855 |
| 1,325 | <i>OSBPL7</i>    | -1.695132164 |
| 1,326 | <i>ZNF568</i>    | -1.694950568 |
| 1,327 | <i>GABRD</i>     | -1.694776756 |
| 1,328 | <i>TROAP</i>     | -1.694519355 |
| 1,329 | <i>ROR1</i>      | -1.694081355 |
| 1,330 | <i>GUCY2C</i>    | -1.693760435 |
| 1,331 | <i>Polio #1</i>  | -1.693637955 |
| 1,332 | <i>KIAA0720</i>  | -1.693510516 |
| 1,333 | <i>OTOP2</i>     | -1.693403386 |
| 1,334 | <i>PSG7</i>      | -1.693314495 |
| 1,335 | <i>SLC17A6</i>   | -1.69326302  |
| 1,336 | <i>CDC5L</i>     | -1.693190292 |
| 1,337 | <i>MACF1</i>     | -1.693094258 |
| 1,338 | <i>MAP4K2</i>    | -1.692741194 |
| 1,339 | <i>P15RS</i>     | -1.692572465 |
| 1,340 | <i>LOC221711</i> | -1.692286807 |
| 1,341 | <i>FLJ37451</i>  | -1.69183898  |
| 1,342 | <i>GALNT9</i>    | -1.691776557 |
| 1,343 | <i>GYPA</i>      | -1.691767813 |
| 1,344 | <i>C1QTNF7</i>   | -1.691571262 |
| 1,345 | <i>C13ORF6</i>   | -1.69135017  |
| 1,346 | <i>TUSC2</i>     | -1.690753414 |
| 1,347 | <i>NFIB</i>      | -1.690549634 |
| 1,348 | <i>ZNFN1A4</i>   | -1.689725183 |
| 1,349 | <i>MGC33951</i>  | -1.689682466 |
| 1,350 | <i>OR1L8</i>     | -1.689631259 |
| 1,351 | <i>GNB4</i>      | -1.68945549  |
| 1,352 | <i>C17ORF39</i>  | -1.689407542 |
| 1,353 | <i>PTK2B</i>     | -1.689233368 |
| 1,354 | <i>SLC6A15</i>   | -1.689110753 |
| 1,355 | <i>UBE2Q1</i>    | -1.689044214 |
| 1,356 | <i>SLC4A4</i>    | -1.688650395 |
| 1,357 | <i>FLJ20257</i>  | -1.688592737 |
| 1,358 | <i>ATP8A1</i>    | -1.688498908 |

|       |               |              |
|-------|---------------|--------------|
| 1,359 | KCNK13        | -1.688485734 |
| 1,360 | ZRANB3        | -1.688281406 |
| 1,361 | ALAS2         | -1.687779526 |
| 1,362 | MGC17330      | -1.68766654  |
| 1,363 | GRP58         | -1.687527917 |
| 1,364 | SLC16A9       | -1.687215373 |
| 1,365 | VAMP3         | -1.687145093 |
| 1,366 | TMEM14B       | -1.687129872 |
| 1,367 | KCNC4         | -1.68663085  |
| 1,368 | C7ORF19       | -1.685627191 |
| 1,369 | SIP1          | -1.685575428 |
| 1,370 | PSMD12        | -1.685371666 |
| 1,371 | MGC42493      | -1.685370691 |
| 1,372 | SRMS          | -1.685207767 |
| 1,373 | ALPP          | -1.684692512 |
| 1,374 | IHPK1         | -1.684615742 |
| 1,375 | RPS6KA3       | -1.683953044 |
| 1,376 | CA12          | -1.683946512 |
| 1,377 | FOXH1         | -1.683822608 |
| 1,378 | CERK          | -1.683716692 |
| 1,379 | PPP1R11       | -1.683472825 |
| 1,380 | LRRC34        | -1.683437587 |
| 1,381 | DOC1          | -1.682767275 |
| 1,382 | FLJ31204      | -1.682711334 |
| 1,383 | DKFZP586J0619 | -1.682607725 |
| 1,384 | NDUFS8        | -1.682480738 |
| 1,385 | S100A5        | -1.682351089 |
| 1,386 | MEGF11        | -1.681933052 |
| 1,387 | STK3          | -1.681749208 |
| 1,388 | MFN1          | -1.68153978  |
| 1,389 | PLAGL1        | -1.681330314 |
| 1,390 | LOC155054     | -1.680846031 |
| 1,391 | PFKP          | -1.6807177   |
| 1,392 | MGC43122      | -1.680627736 |
| 1,393 | NLRC5         | -1.680217884 |
| 1,394 | PRKCL1        | -1.67992841  |
| 1,395 | CCT3          | -1.679624787 |
| 1,396 | DKFZP564I0422 | -1.679621753 |
| 1,397 | SKIV2L2       | -1.679580678 |
| 1,398 | S100A1        | -1.679191482 |
| 1,399 | TMSNB         | -1.67907078  |
| 1,400 | LOC347273     | -1.678546364 |
| 1,401 | CHCHD5        | -1.678147341 |
| 1,402 | UCHL1         | -1.678051078 |
| 1,403 | FLJ32658      | -1.677581712 |
| 1,404 | SPANX-N4      | -1.677540517 |
| 1,405 | ITSN2         | -1.677489898 |

|       |                     |              |
|-------|---------------------|--------------|
| 1,406 | <i>PSMD2</i>        | -1.676806321 |
| 1,407 | <i>TAFA2</i>        | -1.676517645 |
| 1,408 | <i>LOC100131897</i> | -1.676404542 |
| 1,409 | <i>MGC10854</i>     | -1.675958675 |
| 1,410 | <i>EHMT1</i>        | -1.675757686 |
| 1,411 | <i>PARK2</i>        | -1.675735668 |
| 1,412 | <i>C6ORF167</i>     | -1.675285695 |
| 1,413 | <i>GHRL</i>         | -1.674904683 |
| 1,414 | <i>REPIN1</i>       | -1.674768013 |
| 1,415 | <i>IL17RE</i>       | -1.674309167 |
| 1,416 | <i>ZBED2</i>        | -1.674279636 |
| 1,417 | <i>ITGB2</i>        | -1.674094557 |
| 1,418 | <i>NAT6</i>         | -1.673884241 |
| 1,419 | <i>GNE</i>          | -1.673853545 |
| 1,420 | <i>LOC402176</i>    | -1.673805209 |
| 1,421 | <i>S100A3</i>       | -1.673382123 |
| 1,422 | <i>KIAA0286</i>     | -1.67330665  |
| 1,423 | <i>SPANXB2</i>      | -1.673301267 |
| 1,424 | <i>TXNRD1</i>       | -1.673243692 |
| 1,425 | <i>FVT1</i>         | -1.672945673 |
| 1,426 | <i>SPC24</i>        | -1.672877279 |
| 1,427 | <i>LOC388567</i>    | -1.67254709  |
| 1,428 | <i>ZNF215</i>       | -1.67227728  |
| 1,429 | <i>ZNF215</i>       | -1.67227728  |
| 1,430 | <i>KIF13A</i>       | -1.672234515 |
| 1,431 | <i>ZSCAN1</i>       | -1.671991378 |
| 1,432 | <i>PSMA1</i>        | -1.67169374  |
| 1,433 | <i>ZNF512</i>       | -1.671649507 |
| 1,434 | <i>PEPP2</i>        | -1.671502396 |
| 1,435 | <i>CDCA3</i>        | -1.671079481 |
| 1,436 | <i>ADAM28</i>       | -1.671047722 |
| 1,437 | <i>GARS</i>         | -1.670342071 |
| 1,438 | <i>ADAMTS6</i>      | -1.670244512 |
| 1,439 | <i>TRO</i>          | -1.670132416 |
| 1,440 | <i>LOC340168</i>    | -1.670118998 |
| 1,441 | <i>POLE4</i>        | -1.670086313 |
| 1,442 | <i>FLJ13955</i>     | -1.66993914  |
| 1,443 | <i>ZNF32</i>        | -1.669884168 |
| 1,444 | <i>DCXR</i>         | -1.669469875 |
| 1,445 | <i>HOXD4</i>        | -1.6693219   |
| 1,446 | <i>SLC6A11</i>      | -1.669074905 |
| 1,447 | <i>C9ORF84</i>      | -1.669051916 |
| 1,448 | <i>LEAP-2</i>       | -1.668991058 |
| 1,449 | <i>CCNT2</i>        | -1.668753726 |
| 1,450 | <i>KERA</i>         | -1.668563546 |
| 1,451 | <i>BMS1L</i>        | -1.668157111 |
| 1,452 | <i>MGC39520</i>     | -1.668046426 |

|       |                      |              |
|-------|----------------------|--------------|
| 1,453 | <i>BDG29</i>         | -1.667507274 |
| 1,454 | <i>SPDEF</i>         | -1.667119967 |
| 1,455 | <i>ACADL</i>         | -1.667068949 |
| 1,456 | <i>RPL26</i>         | -1.66689701  |
| 1,457 | <i>DUSP9</i>         | -1.666733675 |
| 1,458 | <i>NPHP4</i>         | -1.666494905 |
| 1,459 | <i>FLJ35782</i>      | -1.666095756 |
| 1,460 | <i>FLJ90013</i>      | -1.664877708 |
| 1,461 | <i>MMP13</i>         | -1.664618972 |
| 1,462 | <i>OTUB2</i>         | -1.664588944 |
| 1,463 | <i>DKFZP762C1112</i> | -1.664289724 |
| 1,464 | <i>CUL4A</i>         | -1.664260313 |
| 1,465 | <i>TMEM23</i>        | -1.66418758  |
| 1,466 | <i>IPO13</i>         | -1.66407946  |
| 1,467 | <i>LOC81558</i>      | -1.664024401 |
| 1,468 | <i>AMN</i>           | -1.663948303 |
| 1,469 | <i>C10ORF90</i>      | -1.663475076 |
| 1,470 | <i>Polio #1</i>      | -1.663427598 |
| 1,471 | <i>BIG1</i>          | -1.66341817  |
| 1,472 | <i>GCET2</i>         | -1.663376336 |
| 1,473 | <i>FOXO4B</i>        | -1.66329124  |
| 1,474 | <i>SLIC1</i>         | -1.66314137  |
| 1,475 | <i>ILF2</i>          | -1.662944032 |
| 1,476 | <i>UFD1L</i>         | -1.662681049 |
| 1,477 | <i>POLR2J3</i>       | -1.662610668 |
| 1,478 | <i>DSCR9</i>         | -1.662491543 |
| 1,479 | <i>ADD2</i>          | -1.662419706 |
| 1,480 | <i>CSPG4</i>         | -1.662391347 |
| 1,481 | <i>PRSS16</i>        | -1.662208027 |
| 1,482 | <i>FIGNL1</i>        | -1.661719405 |
| 1,483 | <i>UBE1DC1</i>       | -1.661696461 |
| 1,484 | <i>PLAGL2</i>        | -1.661691396 |
| 1,485 | <i>PERP</i>          | -1.661462956 |
| 1,486 | <i>GTF2H4</i>        | -1.660690191 |
| 1,487 | <i>MGC20410</i>      | -1.660671736 |
| 1,488 | <i>NAV2</i>          | -1.66008956  |
| 1,489 | <i>COMMD5</i>        | -1.659412986 |
| 1,490 | <i>TRIM48</i>        | -1.659181235 |
| 1,491 | <i>FLJ39237</i>      | -1.658940066 |
| 1,492 | <i>CRYGB</i>         | -1.658749063 |
| 1,493 | <i>SIGLEC8</i>       | -1.658606925 |
| 1,494 | <i>MGC30208</i>      | -1.658229642 |
| 1,495 | <i>KRTAP3-1</i>      | -1.658021139 |
| 1,496 | <i>KIAA1683</i>      | -1.657982184 |
| 1,497 | <i>ZNF485</i>        | -1.657926899 |
| 1,498 | <i>MEF2B</i>         | -1.657899254 |
| 1,499 | <i>EIF3S6</i>        | -1.657597513 |



|       |                     |              |
|-------|---------------------|--------------|
| 1,500 | <i>LOC388585</i>    | -1.657431955 |
| 1,501 | <i>FLJ39378</i>     | -1.656934005 |
| 1,502 | <i>STXBP6</i>       | -1.656853557 |
| 1,503 | <i>HIST1H1E</i>     | -1.656439333 |
| 1,504 | <i>RPS11</i>        | -1.655771129 |
| 1,505 | <i>PP3856</i>       | -1.655594865 |
| 1,506 | <i>LONRF1</i>       | -1.655508351 |
| 1,507 | <i>MRP63</i>        | -1.655441384 |
| 1,508 | <i>LCE2B</i>        | -1.655408987 |
| 1,509 | <i>Tox</i>          | -1.655388322 |
| 1,510 | <i>UST</i>          | -1.655231776 |
| 1,511 | <i>F8</i>           | -1.655226703 |
| 1,512 | <i>BCR</i>          | -1.654963111 |
| 1,513 | <i>MGC13186</i>     | -1.654890908 |
| 1,514 | <i>CYP3A7</i>       | -1.654873538 |
| 1,515 | <i>CPA6</i>         | -1.654813935 |
| 1,516 | <i>FLJ45032</i>     | -1.654374554 |
| 1,517 | <i>PNLIPRP1</i>     | -1.654283422 |
| 1,518 | <i>PML</i>          | -1.654138131 |
| 1,519 | <i>CPSF6</i>        | -1.654097638 |
| 1,520 | <i>GLS</i>          | -1.654074694 |
| 1,521 | <i>FDPS</i>         | -1.653973561 |
| 1,522 | <i>ANXA9</i>        | -1.652996898 |
| 1,523 | <i>KCNC3</i>        | -1.65294021  |
| 1,524 | <i>CARD14</i>       | -1.652885705 |
| 1,525 | <i>FLJ20309</i>     | -1.652879811 |
| 1,526 | <i>NSUN2</i>        | -1.652840274 |
| 1,527 | <i>RFPL2</i>        | -1.652737857 |
| 1,528 | <i>MSX1</i>         | -1.652686484 |
| 1,529 | <i>IGF2R</i>        | -1.652497328 |
| 1,530 | <i>ZMYM1</i>        | -1.65247063  |
| 1,531 | <i>CASP10</i>       | -1.652287129 |
| 1,532 | <i>MRPS28</i>       | -1.652202507 |
| 1,533 | <i>ASF1B</i>        | -1.652130538 |
| 1,534 | <i>FAM20A</i>       | -1.652105887 |
| 1,535 | <i>MYST1</i>        | -1.652067399 |
| 1,536 | <i>S100B</i>        | -1.652018152 |
| 1,537 | <i>WNT7A</i>        | -1.651791863 |
| 1,538 | <i>SORL1</i>        | -1.651643956 |
| 1,539 | <i>PP2447</i>       | -1.651419552 |
| 1,540 | <i>LOC91461</i>     | -1.651368649 |
| 1,541 | <i>CDCA7</i>        | -1.651218171 |
| 1,542 | <i>DKFZP434B168</i> | -1.650871173 |
| 1,543 | <i>SMR3B</i>        | -1.650635796 |
| 1,544 | <i>DRD5</i>         | -1.650367248 |
| 1,545 | <i>FBXW7</i>        | -1.65015282  |
| 1,546 | <i>MYT1</i>         | -1.650129102 |

|       |                  |              |
|-------|------------------|--------------|
| 1,547 | <i>FBXL17</i>    | -1.649877606 |
| 1,548 | <i>MAST3</i>     | -1.649513804 |
| 1,549 | <i>ZNF406</i>    | -1.649361781 |
| 1,550 | <i>PSMF1</i>     | -1.649316863 |
| 1,551 | <i>CXCL1</i>     | -1.649226725 |
| 1,552 | <i>LOC442582</i> | -1.648238609 |
| 1,553 | <i>EPHA5</i>     | -1.647567531 |
| 1,554 | <i>FAM24B</i>    | -1.647071992 |
| 1,555 | <i>MCART6</i>    | -1.64682247  |
| 1,556 | <i>FLJ11305</i>  | -1.646530803 |
| 1,557 | <i>KIAA0494</i>  | -1.646167402 |
| 1,558 | <i>SESN1</i>     | -1.646110961 |
| 1,559 | <i>TMF1</i>      | -1.646108527 |
| 1,560 | <i>ZFY</i>       | -1.646068902 |
| 1,561 | <i>FOSB</i>      | -1.645786015 |
| 1,562 | <i>FLJ13391</i>  | -1.645670617 |
| 1,563 | <i>C14ORF159</i> | -1.645669652 |
| 1,564 | <i>SPRR3</i>     | -1.645474924 |
| 1,565 | <i>HHLA3</i>     | -1.645210769 |
| 1,566 | <i>FLJ12973</i>  | -1.644739658 |
| 1,567 | <i>C9ORF42</i>   | -1.644626618 |
| 1,568 | <i>MYL7</i>      | -1.644583173 |
| 1,569 | <i>NY-REN-58</i> | -1.644575303 |
| 1,570 | <i>ZFPM1</i>     | -1.644560302 |
| 1,571 | <i>FLJ14166</i>  | -1.644462108 |
| 1,572 | <i>DMC1</i>      | -1.644374509 |
| 1,573 | <i>GFRA2</i>     | -1.644251267 |
| 1,574 | <i>LOC284194</i> | -1.644221718 |
| 1,575 | <i>LOC203427</i> | -1.644150432 |
| 1,576 | <i>CSF1</i>      | -1.644136548 |
| 1,577 | <i>EIF3S2</i>    | -1.644012613 |
| 1,578 | <i>HIST1H2BD</i> | -1.643950967 |
| 1,579 | <i>C1ORF17</i>   | -1.643940736 |
| 1,580 | <i>HSZFP36</i>   | -1.643870328 |
| 1,581 | <i>FLJ39441</i>  | -1.643775276 |
| 1,582 | <i>ATP6V1C2</i>  | -1.643689391 |
| 1,583 | <i>N4BP2</i>     | -1.643663923 |
| 1,584 | <i>IPO8</i>      | -1.643607128 |
| 1,585 | <i>MRPS5</i>     | -1.643201959 |
| 1,586 | <i>HT014</i>     | -1.643143304 |
| 1,587 | <i>BTBD12</i>    | -1.643055593 |
| 1,588 | <i>GGH</i>       | -1.642920463 |
| 1,589 | <i>STEAP2</i>    | -1.642912947 |
| 1,590 | <i>LOC126295</i> | -1.642730044 |
| 1,591 | <i>LOC441518</i> | -1.642619803 |
| 1,592 | <i>C1orf190</i>  | -1.642545057 |
| 1,593 | <i>LOC388503</i> | -1.642237599 |

|       |                      |              |
|-------|----------------------|--------------|
| 1,594 | <i>C20ORF72</i>      | -1.642001441 |
| 1,595 | <i>FAM43A</i>        | -1.641913807 |
| 1,596 | <i>CART</i>          | -1.641903545 |
| 1,597 | <i>RGL1</i>          | -1.641891303 |
| 1,598 | <i>AQR</i>           | -1.641880584 |
| 1,599 | <i>RKHD2</i>         | -1.640824736 |
| 1,600 | <i>KIAA0648</i>      | -1.640683953 |
| 1,601 | <i>CHMP1.5</i>       | -1.64063721  |
| 1,602 | <i>MGC13183</i>      | -1.640628253 |
| 1,603 | <i>HCP5</i>          | -1.640602905 |
| 1,604 | <i>DKFZP564O0463</i> | -1.640589138 |
| 1,605 | <i>DBR1</i>          | -1.640563717 |
| 1,606 | <i>P518</i>          | -1.640453558 |
| 1,607 | <i>NKAP</i>          | -1.640402724 |
| 1,608 | <i>FLJ90036</i>      | -1.640292265 |
| 1,609 | <i>KIAA0252</i>      | -1.640268555 |
| 1,610 | <i>TARS</i>          | -1.640261547 |
| 1,611 | <i>MAGEC3</i>        | -1.64016275  |
| 1,612 | <i>NODAL</i>         | -1.64012864  |
| 1,613 | <i>SBNO1</i>         | -1.639942776 |
| 1,614 | <i>BENE</i>          | -1.639830738 |
| 1,615 | <i>RANBP3</i>        | -1.639516628 |
| 1,616 | <i>TADA3L</i>        | -1.639465773 |
| 1,617 | <i>GRM6</i>          | -1.639430315 |
| 1,618 | <i>SECP43</i>        | -1.638968803 |
| 1,619 | <i>BAX</i>           | -1.63848053  |
| 1,620 | <i>C11ORF2</i>       | -1.638271388 |
| 1,621 | <i>LOC51321</i>      | -1.637961386 |
| 1,622 | <i>FLJ10665</i>      | -1.637763793 |
| 1,623 | <i>MGC17943</i>      | -1.637763793 |
| 1,624 | <i>KLK7</i>          | -1.637753829 |
| 1,625 | <i>MLSTD2</i>        | -1.63771616  |
| 1,626 | <i>LASS4</i>         | -1.637626546 |
| 1,627 | <i>ODC1</i>          | -1.63762584  |
| 1,628 | <i>STRBP</i>         | -1.637141258 |
| 1,629 | <i>KCNJ4</i>         | -1.637114165 |
| 1,630 | <i>FLJ30681</i>      | -1.637074822 |
| 1,631 | <i>CH25H</i>         | -1.636999562 |
| 1,632 | <i>KHSRP</i>         | -1.636940957 |
| 1,633 | <i>FLJ20477</i>      | -1.636786857 |
| 1,634 | <i>TCP10L</i>        | -1.636560328 |
| 1,635 | <i>OLFM3</i>         | -1.636478082 |
| 1,636 | <i>CLIPR-59</i>      | -1.635595171 |
| 1,637 | <i>PIP5K2B</i>       | -1.635249252 |
| 1,638 | <i>GJA5</i>          | -1.634911665 |
| 1,639 | <i>TCAP</i>          | -1.634896751 |
| 1,640 | <i>CYP4X1</i>        | -1.634836301 |

|       |                  |              |
|-------|------------------|--------------|
| 1,641 | <i>OR13H1</i>    | -1.634778274 |
| 1,642 | <i>NME1-NME2</i> | -1.634495653 |
| 1,643 | <i>ZNF331</i>    | -1.63436804  |
| 1,644 | <i>OBP2A</i>     | -1.633533562 |
| 1,645 | <i>RPL23</i>     | -1.633127779 |
| 1,646 | <i>CD68</i>      | -1.63312554  |
| 1,647 | <i>MYO1G</i>     | -1.63310605  |
| 1,648 | <i>EPB41L5</i>   | -1.632831943 |
| 1,649 | <i>PHTF1</i>     | -1.632693776 |
| 1,650 | <i>SLC13A5</i>   | -1.632173011 |
| 1,651 | <i>TAS2R13</i>   | -1.63192972  |
| 1,652 | <i>C19ORF25</i>  | -1.631398771 |
| 1,653 | <i>EPHB2</i>     | -1.631391862 |
| 1,654 | <i>TPM2</i>      | -1.631373488 |
| 1,655 | <i>KIAA0703</i>  | -1.631327086 |
| 1,656 | <i>PSAT1</i>     | -1.631178926 |
| 1,657 | <i>NICE-4</i>    | -1.630865885 |
| 1,658 | <i>EGFL11</i>    | -1.630471344 |
| 1,659 | <i>FLJ23375</i>  | -1.63046299  |
| 1,660 | <i>DNAJC8</i>    | -1.630391206 |
| 1,661 | <i>C10ORF48</i>  | -1.630072835 |
| 1,662 | <i>RNASEH2A</i>  | -1.62949008  |
| 1,663 | <i>GPRC6A</i>    | -1.62938774  |
| 1,664 | <i>TOR1B</i>     | -1.629067386 |
| 1,665 | <i>PAXIP1L</i>   | -1.628868681 |
| 1,666 | <i>OR5D16</i>    | -1.628641279 |
| 1,667 | <i>C20ORF58</i>  | -1.628623124 |
| 1,668 | <i>MAPKAPK2</i>  | -1.628518517 |
| 1,669 | <i>C14ORF20</i>  | -1.628148378 |
| 1,670 | <i>C6ORF198</i>  | -1.627041288 |
| 1,671 | <i>FLJ12998</i>  | -1.626728335 |
| 1,672 | <i>PSMD3</i>     | -1.62637812  |
| 1,673 | <i>C10orf130</i> | -1.626132373 |
| 1,674 | <i>CBX1</i>      | -1.625888311 |
| 1,675 | <i>ZNF585A</i>   | -1.625618905 |
| 1,676 | <i>PHLDA3</i>    | -1.625558059 |
| 1,677 | <i>SLC19A3</i>   | -1.625129143 |
| 1,678 | <i>HK3</i>       | -1.625039326 |
| 1,679 | <i>GALNT12</i>   | -1.624258927 |
| 1,680 | <i>PLOD</i>      | -1.62422421  |
| 1,681 | <i>KIAA1509</i>  | -1.624039819 |
| 1,682 | <i>TMEM49</i>    | -1.623980881 |
| 1,683 | <i>HSN2</i>      | -1.623063042 |
| 1,684 | <i>TSFM</i>      | -1.622872477 |
| 1,685 | <i>ELMO1</i>     | -1.622835107 |
| 1,686 | <i>FER1L3</i>    | -1.622523624 |
| 1,687 | <i>TRAPPC3</i>   | -1.62208468  |

|       |                  |              |
|-------|------------------|--------------|
| 1,688 | <i>FCHSD2</i>    | -1.621928736 |
| 1,689 | <i>COPA</i>      | -1.621630956 |
| 1,690 | <i>F9</i>        | -1.621474828 |
| 1,691 | <i>ANTXR1</i>    | -1.621208809 |
| 1,692 | <i>FLJ11193</i>  | -1.620714877 |
| 1,693 | <i>LOC55974</i>  | -1.620592211 |
| 1,694 | <i>RAD54B</i>    | -1.620478561 |
| 1,695 | <i>RPS4X</i>     | -1.620261823 |
| 1,696 | <i>KIAA1765</i>  | -1.620233397 |
| 1,697 | <i>UBADC1</i>    | -1.620131556 |
| 1,698 | <i>ITGAL</i>     | -1.619422544 |
| 1,699 | <i>FLJ13941</i>  | -1.619073923 |
| 1,700 | <i>NR3C2</i>     | -1.619010205 |
| 1,701 | <i>GCNT2</i>     | -1.618568418 |
| 1,702 | <i>LOC388701</i> | -1.61844896  |
| 1,703 | <i>PPP1R14C</i>  | -1.618403949 |
| 1,704 | <i>PRPF3</i>     | -1.618247389 |
| 1,705 | <i>PKP3</i>      | -1.618127463 |
| 1,706 | <i>KRTAP15-1</i> | -1.618104755 |
| 1,707 | <i>ABCB7</i>     | -1.617942666 |
| 1,708 | <i>FBLN1</i>     | -1.617725755 |
| 1,709 | <i>HBE1</i>      | -1.617462765 |
| 1,710 | <i>VAV3</i>      | -1.617200358 |
| 1,711 | <i>SLC39A1</i>   | -1.616799801 |
| 1,712 | <i>RPS21</i>     | -1.616673166 |
| 1,713 | <i>MGC15677</i>  | -1.616515567 |
| 1,714 | <i>FLJ45537</i>  | -1.616209169 |
| 1,715 | <i>LOC90806</i>  | -1.615891999 |
| 1,716 | <i>RTDR1</i>     | -1.615836285 |
| 1,717 | <i>OR10J1</i>    | -1.61560283  |
| 1,718 | <i>NFRKB</i>     | -1.615553275 |
| 1,719 | <i>HNRPA2B1</i>  | -1.615269778 |
| 1,720 | <i>ANGPTL6</i>   | -1.615255514 |
| 1,721 | <i>CCM1</i>      | -1.614634108 |
| 1,722 | <i>KIAA1787</i>  | -1.614508689 |
| 1,723 | <i>INA</i>       | -1.614370861 |
| 1,724 | <i>LOC197322</i> | -1.614201714 |
| 1,725 | <i>ZFH4</i>      | -1.614129249 |
| 1,726 | <i>WBSCR17</i>   | -1.613462218 |
| 1,727 | <i>NANOS2</i>    | -1.613423395 |
| 1,728 | <i>DCTD</i>      | -1.613336647 |
| 1,729 | <i>MRCL3</i>     | -1.613196287 |
| 1,730 | <i>XYLB</i>      | -1.613074069 |
| 1,731 | <i>KIAA1754L</i> | -1.612834596 |
| 1,732 | <i>ITGA2B</i>    | -1.612826608 |
| 1,733 | <i>RABGGTA</i>   | -1.612769255 |
| 1,734 | <i>ULBP1</i>     | -1.612646097 |

|       |           |              |
|-------|-----------|--------------|
| 1,735 | PPP2R5A   | -1.61254444  |
| 1,736 | LOC339398 | -1.61240528  |
| 1,737 | MGC33530  | -1.612244626 |
| 1,738 | ALKBH2    | -1.612106303 |
| 1,739 | SNRPB2    | -1.612033942 |
| 1,740 | PHEMX     | -1.611920149 |
| 1,741 | ZNF335    | -1.611860898 |
| 1,742 | PIAS1     | -1.611811609 |
| 1,743 | LOC375035 | -1.611136569 |
| 1,744 | SKIV2L    | -1.6110926   |
| 1,745 | RFX1      | -1.610927048 |
| 1,746 | C2ORF7    | -1.610791733 |
| 1,747 | H2AFJ     | -1.610690646 |
| 1,748 | HSPC051   | -1.61067902  |
| 1,749 | Mock      | -1.610648097 |
| 1,750 | BOMB      | -1.610458146 |
| 1,751 | LOC401940 | -1.610085817 |
| 1,752 | NOV1      | -1.610053366 |
| 1,753 | TNRC5     | -1.60969982  |
| 1,754 | TMPRSS3   | -1.609564396 |
| 1,755 | ZNF556    | -1.609381527 |
| 1,756 | WNK4      | -1.609375523 |
| 1,757 | SEPHS1    | -1.609154296 |
| 1,758 | UBE2M     | -1.609137499 |
| 1,759 | FBXL3A    | -1.608962554 |
| 1,760 | DHX29     | -1.608736146 |
| 1,761 | SLC30A9   | -1.60831529  |
| 1,762 | LY6D      | -1.608253846 |
| 1,763 | DTX1      | -1.608105832 |
| 1,764 | KIAA1193  | -1.608006289 |
| 1,765 | MFAP3     | -1.608005554 |
| 1,766 | LOC148137 | -1.607922464 |
| 1,767 | LSM7      | -1.607710495 |
| 1,768 | FLJ10213  | -1.607623912 |
| 1,769 | GSG1      | -1.607519643 |
| 1,770 | PDK1      | -1.607494521 |
| 1,771 | C22ORF9   | -1.606888508 |
| 1,772 | BLNK      | -1.60679987  |
| 1,773 | CHI3L2    | -1.606725656 |
| 1,774 | LOC133957 | -1.605946659 |
| 1,775 | SMARCA1   | -1.605882839 |
| 1,776 | POLL      | -1.605749993 |
| 1,777 | ALG2      | -1.605749993 |
| 1,778 | CYLC2     | -1.605407272 |
| 1,779 | LOC339229 | -1.605327001 |
| 1,780 | OR2T5     | -1.605157355 |
| 1,781 | ABCC1     | -1.605115492 |

|       |                  |              |
|-------|------------------|--------------|
| 1,782 | <i>OR5T3</i>     | -1.605078581 |
| 1,783 | <i>CYP2E1</i>    | -1.604889617 |
| 1,784 | <i>TTF1</i>      | -1.604636505 |
| 1,785 | <i>FLJ14936</i>  | -1.604427896 |
| 1,786 | <i>ARL6IP</i>    | -1.604154092 |
| 1,787 | <i>FLJ31951</i>  | -1.603768197 |
| 1,788 | <i>ZNF99</i>     | -1.60283748  |
| 1,789 | <i>C22ORF3</i>   | -1.602318022 |
| 1,790 | <i>CXorf64</i>   | -1.602301645 |
| 1,791 | <i>CIB3</i>      | -1.60225494  |
| 1,792 | <i>KCNQ1</i>     | -1.602233614 |
| 1,793 | <i>MAF</i>       | -1.602151686 |
| 1,794 | <i>CGI-94</i>    | -1.601861785 |
| 1,795 | <i>BRD3</i>      | -1.60159917  |
| 1,796 | <i>SNTB2</i>     | -1.601589596 |
| 1,797 | <i>ZFD25</i>     | -1.600809982 |
| 1,798 | <i>PCDHGB6</i>   | -1.600757327 |
| 1,799 | <i>GNB2L1</i>    | -1.600723744 |
| 1,800 | <i>GSG2</i>      | -1.600536786 |
| 1,801 | <i>LOC649055</i> | -1.600375531 |
| 1,802 | <i>OR10P1</i>    | -1.600179123 |
| 1,803 | <i>C19ORF10</i>  | -1.600169387 |
| 1,804 | <i>LOC147965</i> | -1.599928551 |
| 1,805 | <i>FLJ12886</i>  | -1.599863763 |
| 1,806 | <i>OR5AR1</i>    | -1.599673489 |
| 1,807 | <i>TTF2</i>      | -1.599075275 |
| 1,808 | <i>LOC727936</i> | -1.598967179 |
| 1,809 | <i>GSTM5</i>     | -1.598951754 |
| 1,810 | <i>PTRF</i>      | -1.598950657 |
| 1,811 | <i>ARP3BETA</i>  | -1.598601329 |
| 1,812 | <i>SPPL3</i>     | -1.598582482 |
| 1,813 | <i>NMUR1</i>     | -1.598495898 |
| 1,814 | <i>C6ORF117</i>  | -1.598455761 |
| 1,815 | <i>TTBK1</i>     | -1.598019513 |
| 1,816 | <i>CKLFSF7</i>   | -1.597605429 |
| 1,817 | <i>HSH2D</i>     | -1.597143001 |
| 1,818 | <i>FLJ20255</i>  | -1.597077044 |
| 1,819 | <i>LOC283551</i> | -1.597057679 |
| 1,820 | <i>SNX8</i>      | -1.596930876 |
| 1,821 | <i>LRRC33</i>    | -1.596453229 |
| 1,822 | <i>CAPON</i>     | -1.596426046 |
| 1,823 | <i>FLJ23018</i>  | -1.596196513 |
| 1,824 | <i>TAX1BP3</i>   | -1.596011001 |
| 1,825 | <i>LASS2</i>     | -1.595576631 |
| 1,826 | <i>TM4SF20</i>   | -1.59550223  |
| 1,827 | <i>FLJ12892</i>  | -1.595364983 |
| 1,828 | <i>HLA-DQA1</i>  | -1.595254824 |

|       |                  |              |
|-------|------------------|--------------|
| 1,829 | <i>CROT</i>      | -1.59499374  |
| 1,830 | <i>ADAM15</i>    | -1.594711504 |
| 1,831 | <i>D2S448</i>    | -1.594420941 |
| 1,832 | <i>TRPM7</i>     | -1.594416428 |
| 1,833 | <i>EPC1</i>      | -1.594042392 |
| 1,834 | <i>FLJ25348</i>  | -1.593769409 |
| 1,835 | <i>FCGRT</i>     | -1.593687518 |
| 1,836 | <i>MUM1</i>      | -1.593583953 |
| 1,837 | <i>FBXO44</i>    | -1.593555507 |
| 1,838 | <i>LY64</i>      | -1.593277501 |
| 1,839 | <i>RHBDL1</i>    | -1.593063507 |
| 1,840 | <i>MASP1</i>     | -1.593063507 |
| 1,841 | <i>ADCY8</i>     | -1.593014916 |
| 1,842 | <i>HNRPD</i>     | -1.59295635  |
| 1,843 | <i>ARHGEF12</i>  | -1.592844535 |
| 1,844 | <i>MRPL51</i>    | -1.592814543 |
| 1,845 | <i>KRT9</i>      | -1.592700647 |
| 1,846 | <i>CCK</i>       | -1.592546375 |
| 1,847 | <i>FLJ32009</i>  | -1.592145858 |
| 1,848 | <i>CLIC3</i>     | -1.592072236 |
| 1,849 | <i>MGC27016</i>  | -1.592012847 |
| 1,850 | <i>FOXD4L5</i>   | -1.591938792 |
| 1,851 | <i>BRDT</i>      | -1.591717887 |
| 1,852 | <i>LGMN</i>      | -1.591486958 |
| 1,853 | <i>CCDC3</i>     | -1.591260705 |
| 1,854 | <i>OR9I1</i>     | -1.591029049 |
| 1,855 | <i>LOC90525</i>  | -1.590948525 |
| 1,856 | <i>PSEN2</i>     | -1.590865454 |
| 1,857 | <i>ADIPOR1</i>   | -1.590499961 |
| 1,858 | <i>XAB2</i>      | -1.590239486 |
| 1,859 | <i>CKS1B</i>     | -1.589554736 |
| 1,860 | <i>STK32B</i>    | -1.589453946 |
| 1,861 | <i>USH3A</i>     | -1.589421035 |
| 1,862 | <i>CML2</i>      | -1.589386212 |
| 1,863 | <i>BCNP1</i>     | -1.58937965  |
| 1,864 | <i>GRB2</i>      | -1.589287187 |
| 1,865 | <i>C20ORF9</i>   | -1.589226289 |
| 1,866 | <i>THBD</i>      | -1.588937944 |
| 1,867 | <i>AHR</i>       | -1.588850314 |
| 1,868 | <i>TTMA</i>      | -1.588601284 |
| 1,869 | <i>LOC402682</i> | -1.588423067 |
| 1,870 | <i>RPS5</i>      | -1.588340936 |
| 1,871 | <i>FLJ32115</i>  | -1.587703887 |
| 1,872 | <i>CACNB3</i>    | -1.587394539 |
| 1,873 | <i>ZNF195</i>    | -1.586761408 |
| 1,874 | <i>MAGED4</i>    | -1.586555869 |
| 1,875 | <i>FBXO32</i>    | -1.586323629 |



|       |               |              |
|-------|---------------|--------------|
| 1,876 | DKFZP434B227  | -1.586236227 |
| 1,877 | HNRPUL1       | -1.585742563 |
| 1,878 | NUP160        | -1.585572804 |
| 1,879 | PASK          | -1.585304557 |
| 1,880 | SMCR7         | -1.584604561 |
| 1,881 | QKI           | -1.584489293 |
| 1,882 | SARS2         | -1.584354311 |
| 1,883 | SAFB          | -1.583950308 |
| 1,884 | ABO           | -1.583945061 |
| 1,885 | MGC35308      | -1.583906502 |
| 1,886 | FLOT2         | -1.583892689 |
| 1,887 | OR9K2         | -1.583842426 |
| 1,888 | FOS           | -1.583831259 |
| 1,889 | PANK4         | -1.583635063 |
| 1,890 | GNRHR         | -1.583527372 |
| 1,891 | BNC2          | -1.583425643 |
| 1,892 | CHRNA5        | -1.583375623 |
| 1,893 | DEFB121       | -1.583005835 |
| 1,894 | NPD014        | -1.58297706  |
| 1,895 | NDNL2         | -1.582714048 |
| 1,896 | SLC2A12       | -1.582683941 |
| 1,897 | CD163         | -1.582597196 |
| 1,898 | LOC196463     | -1.58246281  |
| 1,899 | MAP2K1IP1     | -1.582072543 |
| 1,900 | TBX6          | -1.582021816 |
| 1,901 | TCL1A         | -1.581863943 |
| 1,902 | CMKOR1        | -1.581841365 |
| 1,903 | DKFZP434H2215 | -1.581665234 |
| 1,904 | DFNB59        | -1.581326298 |
| 1,905 | CAMSAP1       | -1.580941825 |
| 1,906 | RTN4RL1       | -1.580941032 |
| 1,907 | FLJ10199      | -1.580929037 |
| 1,908 | LOC283219     | -1.580911571 |
| 1,909 | MGC29643      | -1.58051514  |
| 1,910 | MGC3265       | -1.580445889 |
| 1,911 | PEPD          | -1.580268606 |
| 1,912 | ADAM18        | -1.580151208 |
| 1,913 | IL31RA        | -1.57988229  |
| 1,914 | MGC45780      | -1.579842227 |
| 1,915 | FLJ12587      | -1.579468295 |
| 1,916 | DEFB124       | -1.579328471 |
| 1,917 | DEFB124       | -1.579328471 |
| 1,918 | INHBE         | -1.579275472 |
| 1,919 | FCGR1A        | -1.579257909 |
| 1,920 | PRKAG2        | -1.579214315 |
| 1,921 | KIAA1582      | -1.57899327  |
| 1,922 | TIZ           | -1.578877604 |

|       |                  |              |
|-------|------------------|--------------|
| 1,923 | <i>C9ORF72</i>   | -1.578825715 |
| 1,924 | <i>KIAA1893</i>  | -1.578823504 |
| 1,925 | <i>RNPEPL1</i>   | -1.578734908 |
| 1,926 | <i>CRLF3</i>     | -1.578304633 |
| 1,927 | <i>GABRA6</i>    | -1.578120118 |
| 1,928 | <i>ACSM3</i>     | -1.577760257 |
| 1,929 | <i>PROK1</i>     | -1.57767652  |
| 1,930 | <i>GPR174</i>    | -1.577615309 |
| 1,931 | <i>MGC33094</i>  | -1.577219105 |
| 1,932 | <i>ZNF7</i>      | -1.577184837 |
| 1,933 | <i>KRT5</i>      | -1.57684612  |
| 1,934 | <i>MGC16028</i>  | -1.576678307 |
| 1,935 | <i>LOC401052</i> | -1.576517951 |
| 1,936 | <i>DEFA4</i>     | -1.576395568 |
| 1,937 | <i>SMOC1</i>     | -1.576195037 |
| 1,938 | <i>OR6F1</i>     | -1.575814796 |
| 1,939 | <i>UGA #1</i>    | -1.575477008 |
| 1,940 | <i>LOC155435</i> | -1.575411013 |
| 1,941 | <i>ASAM</i>      | -1.574697443 |
| 1,942 | <i>PLAT</i>      | -1.574660686 |
| 1,943 | <i>FLJ40311</i>  | -1.574385431 |
| 1,944 | <i>C14ORF112</i> | -1.574380333 |
| 1,945 | <i>SV2C</i>      | -1.574366842 |
| 1,946 | <i>DEFB130</i>   | -1.573932439 |
| 1,947 | <i>ING3</i>      | -1.573812989 |
| 1,948 | <i>SEC14L2</i>   | -1.573665096 |
| 1,949 | <i>HSPC009</i>   | -1.573539394 |
| 1,950 | <i>FLJ36268</i>  | -1.573350339 |
| 1,951 | <i>FLJ22938</i>  | -1.573174763 |
| 1,952 | <i>ACSL1</i>     | -1.573100985 |
| 1,953 | <i>CRH</i>       | -1.573035619 |
| 1,954 | <i>FLJ10719</i>  | -1.572913324 |
| 1,955 | <i>CML66</i>     | -1.572576883 |
| 1,956 | <i>ICAM2</i>     | -1.572467835 |
| 1,957 | <i>DAB2IP</i>    | -1.572001601 |
| 1,958 | <i>SCXA</i>      | -1.571992258 |
| 1,959 | <i>LBP</i>       | -1.571988565 |
| 1,960 | <i>CMYA1</i>     | -1.571844041 |
| 1,961 | <i>BAIAP1</i>    | -1.571413372 |
| 1,962 | <i>LOC116238</i> | -1.571402328 |
| 1,963 | <i>HCMOGT-1</i>  | -1.571220133 |
| 1,964 | <i>FLJ31295</i>  | -1.571196116 |
| 1,965 | <i>FLJ39660</i>  | -1.570943754 |
| 1,966 | <i>NUP205</i>    | -1.570813663 |
| 1,967 | <i>CDH18</i>     | -1.570654769 |
| 1,968 | <i>FLJ31121</i>  | -1.570606147 |
| 1,969 | <i>MUTED</i>     | -1.570355095 |

|       |                  |              |
|-------|------------------|--------------|
| 1,970 | <i>FGF9</i>      | -1.570308466 |
| 1,971 | <i>MULK</i>      | -1.570277173 |
| 1,972 | <i>AFG3L2</i>    | -1.570190273 |
| 1,973 | <i>C3orf31</i>   | -1.569987939 |
| 1,974 | <i>RAB40A</i>    | -1.569859293 |
| 1,975 | <i>TTN</i>       | -1.569803437 |
| 1,976 | <i>CPN2</i>      | -1.569731478 |
| 1,977 | <i>PDZK8</i>     | -1.569635804 |
| 1,978 | <i>MGC33302</i>  | -1.569345653 |
| 1,979 | <i>POU4F1</i>    | -1.569195196 |
| 1,980 | <i>GNA13</i>     | -1.569192066 |
| 1,981 | <i>LAPTM4A</i>   | -1.569131978 |
| 1,982 | <i>POFUT2</i>    | -1.569005607 |
| 1,983 | <i>KCNK5</i>     | -1.568845696 |
| 1,984 | <i>BCKDK</i>     | -1.568614081 |
| 1,985 | <i>RTP2</i>      | -1.568338625 |
| 1,986 | <i>DDX51</i>     | -1.568054368 |
| 1,987 | <i>LOC150383</i> | -1.567990899 |
| 1,988 | <i>MGC2574</i>   | -1.567977514 |
| 1,989 | <i>PSMB5</i>     | -1.567703449 |
| 1,990 | <i>PGRMC1</i>    | -1.567563006 |
| 1,991 | <i>CTNS</i>      | -1.567530089 |
| 1,992 | <i>TWSG1</i>     | -1.567318939 |
| 1,993 | <i>HLXB9</i>     | -1.56720032  |
| 1,994 | <i>ZNF559</i>    | -1.567092395 |
| 1,995 | <i>SHFM1</i>     | -1.567087347 |
| 1,996 | <i>DUB1A</i>     | -1.566925609 |
| 1,997 | <i>DAD1</i>      | -1.566691814 |
| 1,998 | <i>CARD6</i>     | -1.566566137 |
| 1,999 | <i>TNFSF11</i>   | -1.566507945 |
| 2,000 | <i>TNFSF11</i>   | -1.566507945 |
| 2,001 | <i>C9ORF47</i>   | -1.566306743 |
| 2,002 | <i>FLJ21019</i>  | -1.566199042 |
| 2,003 | <i>PELI1</i>     | -1.566054661 |
| 2,004 | <i>MYO5C</i>     | -1.565778971 |
| 2,005 | <i>RET</i>       | -1.565191756 |
| 2,006 | <i>PLEKHG2</i>   | -1.564463395 |
| 2,007 | <i>APC2</i>      | -1.564450555 |
| 2,008 | <i>TJP1</i>      | -1.564369648 |
| 2,009 | <i>GDDR</i>      | -1.564289609 |
| 2,010 | <i>NPHS2</i>     | -1.564140847 |
| 2,011 | <i>TTC11</i>     | -1.563867237 |
| 2,012 | <i>PHF12</i>     | -1.563527969 |
| 2,013 | <i>OR10A2</i>    | -1.563297164 |
| 2,014 | <i>TNFSF4</i>    | -1.563061799 |
| 2,015 | <i>MIDN</i>      | -1.563046732 |
| 2,016 | <i>RHEBL1</i>    | -1.562815179 |

|       |               |              |
|-------|---------------|--------------|
| 2,017 | PYGL          | -1.562785117 |
| 2,018 | THTPA         | -1.562718727 |
| 2,019 | KCTD2         | -1.562353601 |
| 2,020 | CASP5         | -1.561997522 |
| 2,021 | FLJ45212      | -1.561289831 |
| 2,022 | C18ORF22      | -1.560790927 |
| 2,023 | CNP           | -1.560485651 |
| 2,024 | YTHDF2        | -1.560205257 |
| 2,025 | PPP2R2A       | -1.560062888 |
| 2,026 | CLEC4F        | -1.559866939 |
| 2,027 | TR2IT1        | -1.558967234 |
| 2,028 | DKFZP434P0316 | -1.558566666 |
| 2,029 | KLK1          | -1.558537369 |
| 2,030 | UGT2B7        | -1.55853649  |
| 2,031 | SPINK9        | -1.55844818  |
| 2,032 | LOC116236     | -1.558379082 |
| 2,033 | LEPROTL1      | -1.558289421 |
| 2,034 | FLJ20195      | -1.558056428 |
| 2,035 | SORT1         | -1.557975187 |
| 2,036 | GPHB5         | -1.557862785 |
| 2,037 | PAK7          | -1.557703704 |
| 2,038 | LOC343505     | -1.557578648 |
| 2,039 | LCN6          | -1.557494571 |
| 2,040 | C2ORF4        | -1.557383809 |
| 2,041 | FLJ36046      | -1.55724904  |
| 2,042 | LACRT         | -1.55686957  |
| 2,043 | MNS1          | -1.556719044 |
| 2,044 | RAB11-FIP2    | -1.556390295 |
| 2,045 | DKFZP434L142  | -1.556021262 |
| 2,046 | PTPRB         | -1.555774766 |
| 2,047 | LOC345456     | -1.555633865 |
| 2,048 | MPP7          | -1.555318436 |
| 2,049 | ATP13A5       | -1.555299816 |
| 2,050 | NRAP          | -1.555254525 |
| 2,051 | TOMM70A       | -1.555243604 |
| 2,052 | Polio #1      | -1.55503198  |
| 2,053 | PLSCR3        | -1.554732009 |
| 2,054 | TNRC11        | -1.554704326 |
| 2,055 | C18ORF34      | -1.55453499  |
| 2,056 | TEX13A        | -1.554500227 |
| 2,057 | NINJ1         | -1.554085059 |
| 2,058 | Polio #1      | -1.553920971 |
| 2,059 | KSP37         | -1.553872906 |
| 2,060 | PLK4          | -1.55366875  |
| 2,061 | HRH1          | -1.553625674 |
| 2,062 | GGTL4         | -1.553581092 |

|       |           |              |
|-------|-----------|--------------|
| 2,063 | MCSP      | -1.553558644 |
| 2,064 | CKLFSF4   | -1.553432932 |
| 2,065 | PRKCA     | -1.55276216  |
| 2,066 | FBXO6     | -1.552188582 |
| 2,067 | OR3A1     | -1.551990292 |
| 2,068 | PIGH      | -1.551719556 |
| 2,069 | SLC27A2   | -1.551638348 |
| 2,070 | RCHY1     | -1.551614847 |
| 2,071 | MGC34290  | -1.551599456 |
| 2,072 | OR5K2     | -1.551510102 |
| 2,073 | LEPREL1   | -1.551501521 |
| 2,074 | FEM1A     | -1.55146879  |
| 2,075 | FOXR1     | -1.551346729 |
| 2,076 | OR8H1     | -1.550703605 |
| 2,077 | C6ORF151  | -1.550417812 |
| 2,078 | PFDN2     | -1.550339489 |
| 2,079 | GALNTL4   | -1.550190347 |
| 2,080 | TAS2R46   | -1.549985636 |
| 2,081 | LOC440295 | -1.549946528 |
| 2,082 | Polio #1  | -1.549687963 |
| 2,083 | KLK15     | -1.549113374 |
| 2,084 | FLJ00060  | -1.54909382  |
| 2,085 | LOC388962 | -1.548963917 |
| 2,086 | ETAA16    | -1.548963917 |
| 2,087 | FLJ22671  | -1.548497942 |
| 2,088 | SLC18A1   | -1.54843181  |
| 2,089 | PTPRM     | -1.548033447 |
| 2,090 | OMG       | -1.547975615 |
| 2,091 | KRTAP5-11 | -1.547859409 |
| 2,092 | RGS6      | -1.547555444 |
| 2,093 | MGC5242   | -1.547419251 |
| 2,094 | PR1       | -1.547205379 |
| 2,095 | ACVR1B    | -1.54718556  |
| 2,096 | HAS2      | -1.546892422 |
| 2,097 | OR8G1P    | -1.546510359 |
| 2,098 | PDGFRA    | -1.545993903 |
| 2,099 | DDR2      | -1.545966978 |
| 2,100 | SLC7A9    | -1.545582068 |
| 2,101 | NKD1      | -1.545496676 |
| 2,102 | CYBB      | -1.545488437 |
| 2,103 | KCNRG     | -1.544913265 |
| 2,104 | OTOP1     | -1.544800619 |
| 2,105 | GMEB2     | -1.544799568 |
| 2,106 | TSPAN-1   | -1.544558342 |
| 2,107 | CDR1      | -1.544417874 |
| 2,108 | FZD2      | -1.54416304  |

|       |                  |              |
|-------|------------------|--------------|
| 2,109 | <i>PH-4</i>      | -1.543715658 |
| 2,110 | <i>EBP</i>       | -1.54370597  |
| 2,111 | <i>PRG3</i>      | -1.543594442 |
| 2,112 | <i>ZDHHC18</i>   | -1.543544272 |
| 2,113 | <i>DNMT3B</i>    | -1.543211044 |
| 2,114 | <i>CDW52</i>     | -1.543197319 |
| 2,115 | <i>TRIM3</i>     | -1.543193643 |
| 2,116 | <i>RAP1A</i>     | -1.542872326 |
| 2,117 | <i>EXOSC3</i>    | -1.542582431 |
| 2,118 | <i>C19ORF13</i>  | -1.542569821 |
| 2,119 | <i>RP1</i>       | -1.542457919 |
| 2,120 | <i>PP8961</i>    | -1.542382229 |
| 2,121 | <i>SLC4A5</i>    | -1.54201883  |
| 2,122 | <i>G6PD</i>      | -1.541908512 |
| 2,123 | <i>PARVA</i>     | -1.541752883 |
| 2,124 | <i>LOC647060</i> | -1.541690743 |
| 2,125 | <i>AKAP4</i>     | -1.541468438 |
| 2,126 | <i>FLJ20297</i>  | -1.541184183 |
| 2,127 | <i>FLJ11021</i>  | -1.540715671 |
| 2,128 | <i>MGC11256</i>  | -1.540703837 |
| 2,129 | <i>HOXD8</i>     | -1.540681591 |
| 2,130 | <i>PRSS1</i>     | -1.540588541 |
| 2,131 | <i>DEFB129</i>   | -1.540584641 |
| 2,132 | <i>TMPRSS6</i>   | -1.540531819 |
| 2,133 | <i>SPIN2</i>     | -1.540385958 |
| 2,134 | <i>TRA16</i>     | -1.540351257 |
| 2,135 | <i>ASB9</i>      | -1.540185835 |
| 2,136 | <i>FLJ21963</i>  | -1.539634992 |
| 2,137 | <i>CER1</i>      | -1.539501444 |
| 2,138 | <i>C6ORF162</i>  | -1.539435949 |
| 2,139 | <i>TA-LRRP</i>   | -1.539272741 |
| 2,140 | <i>CNTNAP2</i>   | -1.538999146 |
| 2,141 | <i>LOC440456</i> | -1.538844772 |
| 2,142 | <i>TOMM7</i>     | -1.538815737 |
| 2,143 | <i>LOC283985</i> | -1.538800953 |
| 2,144 | <i>LOC497661</i> | -1.538125287 |
| 2,145 | <i>AMFR</i>      | -1.538052552 |
| 2,146 | <i>FLRT1</i>     | -1.537692512 |
| 2,147 | <i>CDC6</i>      | -1.537641255 |
| 2,148 | <i>PSCD3</i>     | -1.537528497 |
| 2,149 | <i>SNAPC3</i>    | -1.537164416 |
| 2,150 | <i>EGFL5</i>     | -1.537022816 |
| 2,151 | <i>D6S2654E</i>  | -1.536781812 |
| 2,152 | <i>DQX1</i>      | -1.536514768 |
| 2,153 | <i>NXP2</i>      | -1.536401556 |
| 2,154 | <i>FLJ32743</i>  | -1.535846209 |
| 2,155 | <i>YIF1</i>      | -1.535846209 |

|       |                      |              |
|-------|----------------------|--------------|
| 2,156 | <i>7H3</i>           | -1.535542367 |
| 2,157 | <i>EIF4G1</i>        | -1.535420535 |
| 2,158 | <i>SCAP</i>          | -1.535406852 |
| 2,159 | <i>TNFRSF17</i>      | -1.535341591 |
| 2,160 | <i>DKFZP586M1120</i> | -1.535175547 |
| 2,161 | <i>WFIKKN</i>        | -1.534616341 |
| 2,162 | <i>TMOD4</i>         | -1.534373386 |
| 2,163 | <i>PLK1</i>          | -1.534033147 |
| 2,164 | <i>RAPSN</i>         | -1.53360664  |
| 2,165 | <i>PLEKHF1</i>       | -1.533582414 |
| 2,166 | <i>LRRC8</i>         | -1.533433333 |
| 2,167 | <i>LOC342096</i>     | -1.533404992 |
| 2,168 | <i>RYK</i>           | -1.533254962 |
| 2,169 | <i>HAP1</i>          | -1.533172895 |
| 2,170 | <i>KLF16</i>         | -1.532991651 |
| 2,171 | <i>C9ORF158</i>      | -1.532879772 |
| 2,172 | <i>FLJ32440</i>      | -1.532868418 |
| 2,173 | <i>MAP1D</i>         | -1.532707662 |
| 2,174 | <i>AMELY</i>         | -1.532684639 |
| 2,175 | <i>OVOL1</i>         | -1.53258596  |
| 2,176 | <i>FOXP2</i>         | -1.532499078 |
| 2,177 | <i>DKFZP761N1114</i> | -1.53224852  |
| 2,178 | <i>IRAK2</i>         | -1.532217577 |
| 2,179 | <i>NPY</i>           | -1.53200523  |
| 2,180 | <i>A2LD1</i>         | -1.531916593 |
| 2,181 | <i>CHRD</i>          | -1.53175821  |
| 2,182 | <i>LW-1</i>          | -1.531747449 |
| 2,183 | <i>PTPN12</i>        | -1.531444905 |
| 2,184 | <i>OR5M1</i>         | -1.531428386 |
| 2,185 | <i>ILF3</i>          | -1.531365188 |
| 2,186 | <i>C4ORF6</i>        | -1.531309037 |
| 2,187 | <i>ZNF358</i>        | -1.531185246 |
| 2,188 | <i>LOC339105</i>     | -1.530993377 |
| 2,189 | <i>ATP6V0D2</i>      | -1.530576028 |
| 2,190 | <i>ARHGDIB</i>       | -1.530063496 |
| 2,191 | <i>C6ORF204</i>      | -1.529894329 |
| 2,192 | <i>C20ORF7</i>       | -1.529439408 |
| 2,193 | <i>RASA3</i>         | -1.529223265 |
| 2,194 | <i>CENPJ</i>         | -1.529220445 |
| 2,195 | <i>FLJ13479</i>      | -1.529216961 |
| 2,196 | <i>MGC3036</i>       | -1.529080315 |
| 2,197 | <i>GEMIN6</i>        | -1.52892419  |
| 2,198 | <i>FLJ40126</i>      | -1.528773369 |
| 2,199 | <i>ICOSL</i>         | -1.528694638 |
| 2,200 | <i>RNF38</i>         | -1.528619752 |
| 2,201 | <i>ROGDI</i>         | -1.528594842 |
| 2,202 | <i>ZC3HDC1</i>       | -1.52847744  |

|       |                 |              |
|-------|-----------------|--------------|
| 2,203 | <i>FLJ36888</i> | -1.528083652 |
| 2,204 | <i>MPDU1</i>    | -1.528062576 |
| 2,205 | <i>GBP1</i>     | -1.52795504  |
| 2,206 | <i>NOL9</i>     | -1.527857083 |
| 2,207 | <i>MAP2K6</i>   | -1.527798795 |
| 2,208 | <i>LOC56920</i> | -1.527764265 |
| 2,209 | <i>MGC11242</i> | -1.52739757  |
| 2,210 | <i>RUTBC1</i>   | -1.527229562 |
| 2,211 | <i>GLUL</i>     | -1.527136422 |
| 2,212 | <i>NIPBL</i>    | -1.527104296 |
| 2,213 | <i>ZDHHC11</i>  | -1.527053597 |
| 2,214 | <i>KIAA1287</i> | -1.526840854 |
| 2,215 | <i>NEF3</i>     | -1.526804632 |
| 2,216 | <i>EIF2S2</i>   | -1.526648218 |
| 2,217 | <i>OR5AP2</i>   | -1.526498422 |
| 2,218 | <i>CDY</i>      | -1.526199041 |
| 2,219 | <i>FLJ23790</i> | -1.526004632 |
| 2,220 | <i>C18ORF24</i> | -1.525927973 |
| 2,221 | <i>ALKBH</i>    | -1.525688219 |
| 2,222 | <i>TLN2</i>     | -1.525507108 |
| 2,223 | <i>KIAA1361</i> | -1.525424945 |
| 2,224 | <i>MBTPS1</i>   | -1.525326977 |
| 2,225 | <i>AP4B1</i>    | -1.525237329 |
| 2,226 | <i>MGC13102</i> | -1.525213727 |
| 2,227 | <i>MGC27169</i> | -1.525127864 |
| 2,228 | <i>ATOX1</i>    | -1.525102355 |
| 2,229 | <i>OR10G4</i>   | -1.524584784 |
| 2,230 | <i>CANX</i>     | -1.524541172 |
| 2,231 | <i>SAS10</i>    | -1.524375058 |
| 2,232 | <i>GRIN3A</i>   | -1.523985655 |
| 2,233 | <i>HMG20B</i>   | -1.523915329 |
| 2,234 | <i>DNAJC13</i>  | -1.523852981 |
| 2,235 | <i>LOC83693</i> | -1.523840277 |
| 2,236 | <i>MYH7B</i>    | -1.523812404 |
| 2,237 | <i>ZNF274</i>   | -1.523612863 |
| 2,238 | <i>LMO7</i>     | -1.523377364 |
| 2,239 | <i>SEC11L1</i>  | -1.522936523 |
| 2,240 | <i>C4BPA</i>    | -1.522906792 |
| 2,241 | <i>ILDR1</i>    | -1.522675634 |
| 2,242 | <i>TSG101</i>   | -1.522393846 |
| 2,243 | <i>OR2Z1</i>    | -1.522176463 |
| 2,244 | <i>C6ORF80</i>  | -1.521454232 |
| 2,245 | <i>COPG</i>     | -1.521230477 |
| 2,246 | <i>RAPH1</i>    | -1.521191621 |
| 2,247 | <i>CRTC2</i>    | -1.521076253 |
| 2,248 | <i>FMNL3</i>    | -1.520903447 |
| 2,249 | <i>TMX2</i>     | -1.520477359 |



|       |              |              |
|-------|--------------|--------------|
| 2,250 | FRMD1        | -1.520468375 |
| 2,251 | C21ORF63     | -1.52002918  |
| 2,252 | C19ORF33     | -1.5197705   |
| 2,253 | CCNK         | -1.519768704 |
| 2,254 | ZNF341       | -1.519756526 |
| 2,255 | TTYH2        | -1.519555734 |
| 2,256 | PDE6H        | -1.519511731 |
| 2,257 | GIMAP5       | -1.519463224 |
| 2,258 | RP6-166C19.4 | -1.519340861 |
| 2,259 | PCDHA9       | -1.519195165 |
| 2,260 | LOC441161    | -1.519096934 |
| 2,261 | MGC40179     | -1.519072593 |
| 2,262 | FAM19A1      | -1.518683673 |
| 2,263 | SPTB         | -1.518431359 |
| 2,264 | NFS1         | -1.518214357 |
| 2,265 | GSDM         | -1.518154555 |
| 2,266 | PIP5KL1      | -1.51814842  |
| 2,267 | FLJ11021     | -1.51808519  |
| 2,268 | FNTB         | -1.517754323 |
| 2,269 | FLJ12572     | -1.517216211 |
| 2,270 | LOC153222    | -1.517192275 |
| 2,271 | SORD         | -1.516757162 |
| 2,272 | LOC90826     | -1.516461223 |
| 2,273 | KIAA1754     | -1.516266765 |
| 2,274 | IRX1         | -1.516219039 |
| 2,275 | OR4S1        | -1.516204936 |
| 2,276 | MGC61571     | -1.516002444 |
| 2,277 | CLN6         | -1.515787647 |
| 2,278 | ELOVL6       | -1.515443751 |
| 2,279 | LOC644150    | -1.515373928 |
| 2,280 | C6ORF57      | -1.515068858 |
| 2,281 | TNK1         | -1.514351899 |
| 2,282 | HNRPDL       | -1.514169325 |
| 2,283 | LOC339184    | -1.513942393 |
| 2,284 | SLC25A10     | -1.513756356 |
| 2,285 | BCL2L1       | -1.512942563 |
| 2,286 | RP6-166C19.5 | -1.512742355 |
| 2,287 | FLJ34588     | -1.512468072 |
| 2,288 | ZDHHC12      | -1.512439933 |
| 2,289 | MGC14156     | -1.512272133 |
| 2,290 | SRPUL        | -1.512076996 |
| 2,291 | TUWD12       | -1.511981262 |
| 2,292 | OR2F2        | -1.511890597 |
| 2,293 | ZBED2        | -1.511857718 |
| 2,294 | ATOH7        | -1.511639253 |
| 2,295 | NCOA7        | -1.511583145 |
| 2,296 | MGC50811     | -1.511553815 |

|       |                      |              |
|-------|----------------------|--------------|
| 2,297 | <i>SEC13L1</i>       | -1.511536918 |
| 2,298 | <i>TXNIP</i>         | -1.51105092  |
| 2,299 | <i>PF6</i>           | -1.510976701 |
| 2,300 | <i>HSPC268</i>       | -1.510555661 |
| 2,301 | <i>PLN</i>           | -1.510422347 |
| 2,302 | <i>ADAMTS15</i>      | -1.510083516 |
| 2,303 | <i>CHP</i>           | -1.510027863 |
| 2,304 | <i>MRPL32</i>        | -1.509888372 |
| 2,305 | <i>CLST11240</i>     | -1.509769965 |
| 2,306 | <i>HOZFP</i>         | -1.50976685  |
| 2,307 | <i>ZNF717</i>        | -1.509698491 |
| 2,308 | <i>EPHB4</i>         | -1.509589246 |
| 2,309 | <i>ABCD1</i>         | -1.509292293 |
| 2,310 | <i>MARK4</i>         | -1.509191673 |
| 2,311 | <i>PLA2G5</i>        | -1.509094837 |
| 2,312 | <i>MGC39325</i>      | -1.50891302  |
| 2,313 | <i>WNT5B</i>         | -1.508859943 |
| 2,314 | <i>FYCO1</i>         | -1.508725507 |
| 2,315 | <i>PCDHB10</i>       | -1.508499543 |
| 2,316 | <i>TPD52L2</i>       | -1.508480069 |
| 2,317 | <i>EBPL</i>          | -1.508323113 |
| 2,318 | <i>RB1CC1</i>        | -1.507976107 |
| 2,319 | <i>RP11-95H8.1</i>   | -1.507951729 |
| 2,320 | <i>COPZ2</i>         | -1.507861686 |
| 2,321 | <i>MRRF</i>          | -1.50748074  |
| 2,322 | <i>LOC115548</i>     | -1.507463691 |
| 2,323 | <i>SYNGAP1</i>       | -1.507332538 |
| 2,324 | <i>CACNA1H</i>       | -1.507236045 |
| 2,325 | <i>ATP6V1C1</i>      | -1.507112003 |
| 2,326 | <i>FGIF</i>          | -1.507041034 |
| 2,327 | <i>CKIP-1</i>        | -1.506508441 |
| 2,328 | <i>TSPYL1</i>        | -1.506498313 |
| 2,329 | <i>NDEL1</i>         | -1.506475334 |
| 2,330 | <i>MGC5178</i>       | -1.506473113 |
| 2,331 | <i>MGC33407</i>      | -1.50617518  |
| 2,332 | <i>C14ORF43</i>      | -1.506051779 |
| 2,333 | <i>EPS8L1</i>        | -1.505936046 |
| 2,334 | <i>GZMK</i>          | -1.505733758 |
| 2,335 | <i>PWWP1</i>         | -1.505409308 |
| 2,336 | <i>DKFZP564I1922</i> | -1.505302673 |
| 2,337 | <i>MCMDC1</i>        | -1.505294474 |
| 2,338 | <i>OR10A4</i>        | -1.505219153 |
| 2,339 | <i>MGC33338</i>      | -1.505150463 |
| 2,340 | <i>VPS11</i>         | -1.504946261 |
| 2,341 | <i>MAZ</i>           | -1.504940715 |
| 2,342 | <i>MATN4</i>         | -1.504674408 |
| 2,343 | <i>ZPBP2</i>         | -1.504674408 |

|       |           |              |
|-------|-----------|--------------|
| 2,344 | SEMA3E    | -1.504434521 |
| 2,345 | MRPL17    | -1.504005352 |
| 2,346 | LOC338773 | -1.503057743 |
| 2,347 | ABTB2     | -1.502946839 |
| 2,348 | HTRA4     | -1.502918013 |
| 2,349 | LOC729515 | -1.502791905 |
| 2,350 | ZFP276    | -1.502337545 |
| 2,351 | FLJ40298  | -1.502282762 |
| 2,352 | CD34      | -1.501973017 |
| 2,353 | NDUFC1    | -1.50189057  |
| 2,354 | RAB32     | -1.501887475 |
| 2,355 | KCTD20    | -1.501866995 |
| 2,356 | MRVI1     | -1.501864376 |
| 2,357 | TTC17     | -1.501841847 |
| 2,358 | HERC1     | -1.501455723 |
| 2,359 | FLJ13841  | -1.501186191 |
| 2,360 | PSAP      | -1.50090906  |
| 2,361 | FBXO43    | -1.500843497 |
| 2,362 | NEURL2    | -1.5007988   |
| 2,363 | KIAA1115  | -1.500727149 |
| 2,364 | DLX6      | -1.500416453 |
| 2,365 | USH1C     | -1.500404958 |
| 2,366 | G1P3      | -1.500194237 |
| 2,367 | RPS25     | -1.5         |
| 2,368 | CBX4      | -1.499912264 |
| 2,369 | LCE2C     | -1.499871936 |
| 2,370 | MGC34725  | -1.499694642 |
| 2,371 | NUDT13    | -1.499675681 |
| 2,372 | C1ORF37   | -1.499339247 |
| 2,373 | CDC42     | -1.498959167 |
| 2,374 | MUCDHL    | -1.498695543 |
| 2,375 | KLRK1     | -1.498693818 |
| 2,376 | DHCR24    | -1.498123285 |
| 2,377 | MOBKL2A   | -1.498071009 |
| 2,378 | ZNF572    | -1.498030511 |
| 2,379 | C6ORF143  | -1.498001963 |
| 2,380 | HSD17B3   | -1.497801494 |
| 2,381 | ARHGEF3   | -1.497770855 |
| 2,382 | SILV      | -1.497656884 |
| 2,383 | OR9Q1     | -1.497454692 |
| 2,384 | C7        | -1.49745422  |
| 2,385 | SULT1C3   | -1.49741529  |
| 2,386 | SLC6A7    | -1.49687485  |
| 2,387 | FSHPRH1   | -1.496384493 |
| 2,388 | NFIC      | -1.496379371 |
| 2,389 | C6ORF110  | -1.496283237 |
| 2,390 | GPR97     | -1.496171557 |

|       |                      |              |
|-------|----------------------|--------------|
| 2,391 | <i>IFNW1</i>         | -1.495996232 |
| 2,392 | <i>NTNG2</i>         | -1.495990219 |
| 2,393 | <i>REC8L1</i>        | -1.495957321 |
| 2,394 | <i>MAP3K3</i>        | -1.495944997 |
| 2,395 | <i>DKFZP43400213</i> | -1.495772314 |
| 2,396 | <i>LITAF</i>         | -1.495625154 |
| 2,397 | <i>CDKN2B</i>        | -1.495487541 |
| 2,398 | <i>LOC51054</i>      | -1.495203638 |
| 2,399 | <i>TOP2A</i>         | -1.493824735 |
| 2,400 | <i>LCE5A</i>         | -1.493781251 |
| 2,401 | <i>BAT1</i>          | -1.493715358 |
| 2,402 | <i>FRG2</i>          | -1.493577811 |
| 2,403 | <i>ABCB10</i>        | -1.492815389 |
| 2,404 | <i>RPL7A</i>         | -1.49273981  |
| 2,405 | <i>GPR144</i>        | -1.49270872  |
| 2,406 | <i>TFR2</i>          | -1.49236198  |
| 2,407 | <i>TIPARP</i>        | -1.49214751  |
| 2,408 | <i>MGC3101</i>       | -1.492051383 |
| 2,409 | <i>BCL7B</i>         | -1.491861789 |
| 2,410 | <i>IMPDH1</i>        | -1.491766809 |
| 2,411 | <i>SLC30A8</i>       | -1.491712418 |
| 2,412 | <i>KCNH8</i>         | -1.49158477  |
| 2,413 | <i>PGM2</i>          | -1.49117132  |
| 2,414 | <i>NR2C2</i>         | -1.491127884 |
| 2,415 | <i>BM039</i>         | -1.491032858 |
| 2,416 | <i>FLJ34969</i>      | -1.490971575 |
| 2,417 | <i>C20ORF46</i>      | -1.490634342 |
| 2,418 | <i>DYRK3</i>         | -1.490633052 |
| 2,419 | <i>FGF20</i>         | -1.490302522 |
| 2,420 | <i>CCKAR</i>         | -1.490295505 |
| 2,421 | <i>USP6</i>          | -1.49014149  |
| 2,422 | <i>ADCK2</i>         | -1.489964364 |
| 2,423 | <i>SLC16A1</i>       | -1.489894755 |
| 2,424 | <i>EEF2</i>          | -1.4897936   |
| 2,425 | <i>IKBKE</i>         | -1.489371103 |
| 2,426 | <i>SEC23IP</i>       | -1.489366529 |
| 2,427 | <i>STARD13</i>       | -1.489351783 |
| 2,428 | <i>STS</i>           | -1.488822138 |
| 2,429 | <i>QRSL1</i>         | -1.488785172 |
| 2,430 | <i>DIAPH1</i>        | -1.488363262 |
| 2,431 | <i>NPTX2</i>         | -1.488118134 |
| 2,432 | <i>LRPPRC</i>        | -1.48811633  |
| 2,433 | <i>RGNEF</i>         | -1.488063124 |
| 2,434 | <i>ICSBP1</i>        | -1.487835803 |
| 2,435 | <i>ANP32A</i>        | -1.48772169  |
| 2,436 | <i>C4ORF7</i>        | -1.487657683 |
| 2,437 | <i>MRPL11</i>        | -1.487485868 |

|       |               |              |
|-------|---------------|--------------|
| 2,438 | RP6-166C19.10 | -1.487448039 |
| 2,439 | RP6-166C19.10 | -1.487448039 |
| 2,440 | PRCP          | -1.487440076 |
| 2,441 | FHOD1         | -1.487439145 |
| 2,442 | CTXN1         | -1.487422417 |
| 2,443 | REP15         | -1.487272135 |
| 2,444 | HPCA          | -1.487199273 |
| 2,445 | PPP2CB        | -1.486840161 |
| 2,446 | DLAT          | -1.486702181 |
| 2,447 | TPSG1         | -1.48666435  |
| 2,448 | LOC283331     | -1.486651366 |
| 2,449 | STK22D        | -1.486620925 |
| 2,450 | ARL10A        | -1.486536911 |
| 2,451 | APPBP1        | -1.486500029 |
| 2,452 | TM4SF11       | -1.486047856 |
| 2,453 | TPX2          | -1.485932159 |
| 2,454 | FSIP2         | -1.485690419 |
| 2,455 | ERH           | -1.485493457 |
| 2,456 | PGBD4         | -1.485191924 |
| 2,457 | FLJ20014      | -1.485150233 |
| 2,458 | FLJ23231      | -1.485078749 |
| 2,459 | TUBA3         | -1.484803942 |
| 2,460 | SLC22A9       | -1.484655417 |
| 2,461 | DCAMKL1       | -1.484640075 |
| 2,462 | USP24         | -1.484629474 |
| 2,463 | FLJ11767      | -1.484443357 |
| 2,464 | FGD3          | -1.484402085 |
| 2,465 | WDTC1         | -1.483836344 |
| 2,466 | DPRX          | -1.483805996 |
| 2,467 | PROCR         | -1.483796532 |
| 2,468 | SLC35A1       | -1.483647091 |
| 2,469 | RPL7          | -1.483118958 |
| 2,470 | SOX8          | -1.482992779 |
| 2,471 | OR2AK2        | -1.482983776 |
| 2,472 | MGC48915      | -1.482574662 |
| 2,473 | SLC35F4       | -1.482495998 |
| 2,474 | TMC1          | -1.481751727 |
| 2,475 | SNAI1         | -1.481475238 |
| 2,476 | C7ORF32       | -1.481347695 |
| 2,477 | HSPC105       | -1.480886973 |
| 2,478 | ZNF443        | -1.480686647 |
| 2,479 | CAPS          | -1.480674533 |
| 2,480 | CALB3         | -1.480637697 |
| 2,481 | AYP1          | -1.480507688 |
| 2,482 | RRAS2         | -1.48042504  |
| 2,483 | MAPK10        | -1.480301089 |
| 2,484 | LOC389289     | -1.480246437 |

|       |           |              |
|-------|-----------|--------------|
| 2,485 | MAPK9     | -1.480241691 |
| 2,486 | CPNE7     | -1.479805794 |
| 2,487 | USP49     | -1.479779816 |
| 2,488 | PANX1     | -1.479736129 |
| 2,489 | FAM14A    | -1.479691099 |
| 2,490 | GBA       | -1.479443895 |
| 2,491 | DAOA      | -1.479342821 |
| 2,492 | FLJ16636  | -1.479182405 |
| 2,493 | FMOD      | -1.479032068 |
| 2,494 | PCOLCE2   | -1.478966991 |
| 2,495 | TBX10     | -1.478654259 |
| 2,496 | ARHGAP20  | -1.478633928 |
| 2,497 | ARHGAP20  | -1.478633928 |
| 2,498 | CD83      | -1.478629602 |
| 2,499 | TIEG      | -1.47858745  |
| 2,500 | FLJ31952  | -1.478434744 |
| 2,501 | MAP2K7    | -1.478421757 |
| 2,502 | MOBKL2B   | -1.478354152 |
| 2,503 | LOC146845 | -1.478200865 |
| 2,504 | FBXO10    | -1.478159875 |
| 2,505 | ELAVL4    | -1.478149718 |
| 2,506 | C11ORF30  | -1.47787106  |
| 2,507 | SLC17A8   | -1.477719495 |
| 2,508 | TOLLIP    | -1.477528816 |
| 2,509 | LOC200008 | -1.477449879 |
| 2,510 | MRPL39    | -1.477425354 |
| 2,511 | LHX5      | -1.477367477 |
| 2,512 | SUCLG2    | -1.477312735 |
| 2,513 | ADAM21    | -1.477282959 |
| 2,514 | DEDD2     | -1.477236146 |
| 2,515 | CARD8     | -1.477059422 |
| 2,516 | TOMM6     | -1.477013249 |
| 2,517 | RUTBC3    | -1.476889355 |
| 2,518 | VAR52     | -1.476820423 |
| 2,519 | STUB1     | -1.476811524 |
| 2,520 | OR5H14    | -1.476715566 |
| 2,521 | CLLU10S   | -1.476440934 |
| 2,522 | PSMB2     | -1.476148207 |
| 2,523 | OR1K1     | -1.476125003 |
| 2,524 | PSMA4     | -1.475952766 |
| 2,525 | BAG3      | -1.47588978  |
| 2,526 | CYP3A43   | -1.475849925 |
| 2,527 | DPYS      | -1.475723529 |
| 2,528 | C14ORF68  | -1.475719042 |
| 2,529 | TGFB3     | -1.475441695 |
| 2,530 | SOCS3     | -1.475170955 |
| 2,531 | PIK3C3    | -1.47480575  |

|       |                  |              |
|-------|------------------|--------------|
| 2,532 | <i>FLJ39647</i>  | -1.474748344 |
| 2,533 | <i>FLJ23506</i>  | -1.474672442 |
| 2,534 | <i>OR56A1</i>    | -1.474544773 |
| 2,535 | <i>FLJ40201</i>  | -1.474526595 |
| 2,536 | <i>MGC26979</i>  | -1.474520032 |
| 2,537 | <i>DOCK6</i>     | -1.474446468 |
| 2,538 | <i>RAD18</i>     | -1.47431808  |
| 2,539 | <i>ANAPC13</i>   | -1.474138066 |
| 2,540 | <i>CNOT2</i>     | -1.474137152 |
| 2,541 | <i>C10ORF67</i>  | -1.474048929 |
| 2,542 | <i>SPC25</i>     | -1.473525367 |
| 2,543 | <i>ZCCHC8</i>    | -1.473459161 |
| 2,544 | <i>FLJ20186</i>  | -1.473160981 |
| 2,545 | <i>PCDHB14</i>   | -1.473079743 |
| 2,546 | <i>C10ORF30</i>  | -1.473046067 |
| 2,547 | <i>SLC25A15</i>  | -1.473018282 |
| 2,548 | <i>C14ORF161</i> | -1.472682799 |
| 2,549 | <i>JOSD1</i>     | -1.472677449 |
| 2,550 | <i>PPEF1</i>     | -1.472647743 |
| 2,551 | <i>CHC1L</i>     | -1.472180345 |
| 2,552 | <i>DNM2</i>      | -1.471879781 |
| 2,553 | <i>TRUB2</i>     | -1.471647897 |
| 2,554 | <i>MGC27016</i>  | -1.47164257  |
| 2,555 | <i>EML5</i>      | -1.471323461 |
| 2,556 | <i>NECAP1</i>    | -1.471248251 |
| 2,557 | <i>SEC22L2</i>   | -1.471049614 |
| 2,558 | <i>GSTA1</i>     | -1.470845934 |
| 2,559 | <i>LOC389813</i> | -1.470823694 |
| 2,560 | <i>RNF165</i>    | -1.470785277 |
| 2,561 | <i>GJC1</i>      | -1.470182805 |
| 2,562 | <i>VAPA</i>      | -1.470035089 |
| 2,563 | <i>SLC39A3</i>   | -1.470012882 |
| 2,564 | <i>ZNF502</i>    | -1.469830506 |
| 2,565 | <i>FLJ42486</i>  | -1.46968653  |
| 2,566 | <i>NEK4</i>      | -1.469582696 |
| 2,567 | <i>SARA2</i>     | -1.469538393 |
| 2,568 | <i>C6ORF4</i>    | -1.46947107  |
| 2,569 | <i>CLEC14A</i>   | -1.469405293 |
| 2,570 | <i>C15</i>       | -1.469367911 |
| 2,571 | <i>NDUFB2</i>    | -1.469303533 |
| 2,572 | <i>STXBP1</i>    | -1.469225752 |
| 2,573 | <i>AMY1A</i>     | -1.469139555 |
| 2,574 | <i>NADSYN1</i>   | -1.46913899  |
| 2,575 | <i>ZNF200</i>    | -1.469120328 |
| 2,576 | <i>KIAA0409</i>  | -1.468914755 |
| 2,577 | <i>CARD4</i>     | -1.468795881 |
| 2,578 | <i>KLHL12</i>    | -1.468707743 |

|       |           |              |
|-------|-----------|--------------|
| 2,579 | KIAA0528  | -1.46865639  |
| 2,580 | FLN29     | -1.468496393 |
| 2,581 | ADAMTS8   | -1.468415006 |
| 2,582 | RXRB      | -1.468382376 |
| 2,583 | GAK       | -1.468334644 |
| 2,584 | CAMKK2    | -1.468201439 |
| 2,585 | CEACAM3   | -1.467975829 |
| 2,586 | FOXA3     | -1.467781404 |
| 2,587 | LOC51233  | -1.467767679 |
| 2,588 | SMARCA5   | -1.467513009 |
| 2,589 | IGFBP5    | -1.467274796 |
| 2,590 | K6IRS3    | -1.467225094 |
| 2,591 | SSR1      | -1.467092153 |
| 2,592 | SOAT2     | -1.467081006 |
| 2,593 | SLC22A13  | -1.467047532 |
| 2,594 | IL6R      | -1.466915345 |
| 2,595 | TBX2      | -1.466869339 |
| 2,596 | C19ORF15  | -1.466801594 |
| 2,597 | PF4       | -1.466665788 |
| 2,598 | SPACA3    | -1.466636063 |
| 2,599 | CNIH2     | -1.466607292 |
| 2,600 | LOC63920  | -1.466593295 |
| 2,601 | FLJ14054  | -1.46655166  |
| 2,602 | STAG1     | -1.466531235 |
| 2,603 | FLJ31121  | -1.466461045 |
| 2,604 | DCK       | -1.466393115 |
| 2,605 | SRD5A2L2  | -1.466380071 |
| 2,606 | KIAA1219  | -1.466365412 |
| 2,607 | C10ORF47  | -1.466186642 |
| 2,608 | C1RL      | -1.466117791 |
| 2,609 | ARG99     | -1.465855495 |
| 2,610 | COMMD9    | -1.465715417 |
| 2,611 | LOC339457 | -1.465665608 |
| 2,612 | C6ORF134  | -1.465610436 |
| 2,613 | MKI67     | -1.465596807 |
| 2,614 | C21ORF5   | -1.465453383 |
| 2,615 | KIF2      | -1.465416051 |
| 2,616 | FLJ20241  | -1.465376051 |
| 2,617 | SLC43A1   | -1.465258577 |
| 2,618 | ITM1      | -1.4652029   |
| 2,619 | GUCA2B    | -1.465159634 |
| 2,620 | NOB1P     | -1.465035425 |
| 2,621 | SYT1      | -1.464958582 |
| 2,622 | ELK3      | -1.464681971 |
| 2,623 | ERCC4     | -1.464623795 |
| 2,624 | GPR148    | -1.464440066 |
| 2,625 | FLJ20010  | -1.464153255 |



|       |           |              |
|-------|-----------|--------------|
| 2,626 | KIAA0685  | -1.464055402 |
| 2,627 | FLJ12118  | -1.464055402 |
| 2,628 | POLD4     | -1.46391747  |
| 2,629 | FLJ20531  | -1.463744118 |
| 2,630 | GUCY2D    | -1.463663023 |
| 2,631 | TULP4     | -1.463501617 |
| 2,632 | KARS      | -1.463496526 |
| 2,633 | CRX       | -1.46341137  |
| 2,634 | EN2       | -1.463101694 |
| 2,635 | ZNF24     | -1.463088745 |
| 2,636 | LOC126208 | -1.462935016 |
| 2,637 | LRRFIP2   | -1.462887506 |
| 2,638 | HOXA2     | -1.462592902 |
| 2,639 | ZNF550    | -1.462466245 |
| 2,640 | TLL1      | -1.462353268 |
| 2,641 | RAC2      | -1.462349949 |
| 2,642 | NDP       | -1.461959017 |
| 2,643 | UBXD2     | -1.461735319 |
| 2,644 | SH3GLB1   | -1.46142713  |
| 2,645 | PRR3      | -1.461115977 |
| 2,646 | SHMT1     | -1.460920686 |
| 2,647 | SFTPA2    | -1.460539967 |
| 2,648 | SLC15A3   | -1.460489289 |
| 2,649 | PLK3      | -1.460341752 |
| 2,650 | CD226     | -1.460274114 |
| 2,651 | TMEM89    | -1.459768451 |
| 2,652 | RIMS4     | -1.459731337 |
| 2,653 | G1P2      | -1.459724886 |
| 2,654 | TOB2      | -1.459528101 |
| 2,655 | LILRB3    | -1.459429208 |
| 2,656 | ZNF615    | -1.459049239 |
| 2,657 | ABCA10    | -1.459043503 |
| 2,658 | LOC751071 | -1.458957493 |
| 2,659 | GREM1     | -1.458873146 |
| 2,660 | PCDHB15   | -1.458749089 |
| 2,661 | LOC645432 | -1.458740923 |
| 2,662 | LOC387778 | -1.45858157  |
| 2,663 | LRFN3     | -1.458575669 |
| 2,664 | FLJ32884  | -1.458319246 |
| 2,665 | LOC344405 | -1.457615032 |
| 2,666 | FLJ11164  | -1.457577887 |
| 2,667 | CREB5     | -1.457547984 |
| 2,668 | PPP1R12B  | -1.457492254 |
| 2,669 | LOC343071 | -1.457430889 |
| 2,670 | LOC284739 | -1.457367461 |
| 2,671 | HLA-G     | -1.457043869 |
| 2,672 | PDK2      | -1.456954061 |

|       |                      |              |
|-------|----------------------|--------------|
| 2,673 | <i>LOC151871</i>     | -1.456823973 |
| 2,674 | <i>DKFZP564B147</i>  | -1.456820188 |
| 2,675 | <i>C20ORF132</i>     | -1.456701667 |
| 2,676 | <i>C17</i>           | -1.456389129 |
| 2,677 | <i>DKFZP564I122</i>  | -1.455994723 |
| 2,678 | <i>SPG20</i>         | -1.455832979 |
| 2,679 | <i>CNIH</i>          | -1.455794644 |
| 2,680 | <i>PRKCI</i>         | -1.455186857 |
| 2,681 | <i>PGLYRP2</i>       | -1.455091525 |
| 2,682 | <i>DKFZP761L1417</i> | -1.454869817 |
| 2,683 | <i>KCNJ1</i>         | -1.454515962 |
| 2,684 | <i>BUCS1</i>         | -1.453948734 |
| 2,685 | <i>CCRL2</i>         | -1.45362084  |
| 2,686 | <i>GRB14</i>         | -1.453617746 |
| 2,687 | <i>ARID1A</i>        | -1.45344034  |
| 2,688 | <i>RPS6KA2</i>       | -1.453433818 |
| 2,689 | <i>S100A2</i>        | -1.453343479 |
| 2,690 | <i>ZFYVE21</i>       | -1.453217553 |
| 2,691 | <i>FRAS1</i>         | -1.453016975 |
| 2,692 | <i>FLJ20244</i>      | -1.452914758 |
| 2,693 | <i>DF</i>            | -1.452896089 |
| 2,694 | <i>MGC14126</i>      | -1.452869489 |
| 2,695 | <i>AQP12</i>         | -1.45284236  |
| 2,696 | <i>LOC123688</i>     | -1.452837907 |
| 2,697 | <i>AD-020</i>        | -1.452630607 |
| 2,698 | <i>182-FIP</i>       | -1.451990154 |
| 2,699 | <i>FLJ42654</i>      | -1.451261554 |
| 2,700 | <i>TNA</i>           | -1.451131154 |
| 2,701 | <i>SFMBT1</i>        | -1.451118287 |
| 2,702 | <i>FLJ45717</i>      | -1.450981733 |
| 2,703 | <i>C21ORF91</i>      | -1.450976845 |
| 2,704 | <i>ANXA7</i>         | -1.450751395 |
| 2,705 | <i>KIAA0280</i>      | -1.450372773 |
| 2,706 | <i>C20ORF165</i>     | -1.450287861 |
| 2,707 | <i>ARMET</i>         | -1.45005484  |
| 2,708 | <i>ARMET</i>         | -1.45005484  |
| 2,709 | <i>MGC18079</i>      | -1.449451215 |
| 2,710 | <i>KRTAP5-6</i>      | -1.449274815 |
| 2,711 | <i>KITLG</i>         | -1.449227877 |
| 2,712 | <i>Polio #1</i>      | -1.449061291 |
| 2,713 | <i>OC90</i>          | -1.448324672 |
| 2,714 | <i>ACLY</i>          | -1.448243859 |
| 2,715 | <i>CBLNL1</i>        | -1.448032322 |
| 2,716 | <i>NIFUN</i>         | -1.447413681 |
| 2,717 | <i>DKFZP564J0863</i> | -1.447227953 |
| 2,718 | <i>MGC15937</i>      | -1.446824802 |

|       |              |              |
|-------|--------------|--------------|
| 2,719 | WBP2         | -1.446794714 |
| 2,720 | MGC23937     | -1.446747291 |
| 2,721 | CSF2RA       | -1.446717623 |
| 2,722 | ZNF598       | -1.446512811 |
| 2,723 | RNH          | -1.446436927 |
| 2,724 | C20ORF79     | -1.446421785 |
| 2,725 | EIF2S3       | -1.446366945 |
| 2,726 | DUX1         | -1.445836561 |
| 2,727 | CNDP2        | -1.445458128 |
| 2,728 | HBD          | -1.445421852 |
| 2,729 | LOC90485     | -1.445397856 |
| 2,730 | RPL23A       | -1.445152522 |
| 2,731 | OMD          | -1.443828622 |
| 2,732 | KIAA0284     | -1.443616219 |
| 2,733 | ADSSL1       | -1.443532783 |
| 2,734 | RP11-564C4.1 | -1.443492361 |
| 2,735 | UNQ739       | -1.443365356 |
| 2,736 | TRPM7        | -1.443331857 |
| 2,737 | ATG16L1      | -1.443268231 |
| 2,738 | KIAA1126     | -1.443253251 |
| 2,739 | GRIPAP1      | -1.443174493 |
| 2,740 | SRRM2        | -1.443036962 |
| 2,741 | HOXC9        | -1.442895425 |
| 2,742 | CSNK2A2      | -1.442821865 |
| 2,743 | CSRP1        | -1.442654169 |
| 2,744 | LOC646424    | -1.442543204 |
| 2,745 | KIAA1002     | -1.44233531  |
| 2,746 | PCSK4        | -1.44233091  |
| 2,747 | KIAA1450     | -1.442268317 |
| 2,748 | TBCE         | -1.44217714  |
| 2,749 | C20ORF14     | -1.441855161 |
| 2,750 | LRP12        | -1.441606512 |
| 2,751 | ADH4         | -1.441572663 |
| 2,752 | PITPNM3      | -1.441127484 |
| 2,753 | OR5H2        | -1.440945903 |
| 2,754 | LOC115861    | -1.440880588 |
| 2,755 | ADAM12       | -1.440651474 |
| 2,756 | PLEKHH1      | -1.44058107  |
| 2,757 | FLJ14681     | -1.440379545 |
| 2,758 | HOXD12       | -1.440326747 |
| 2,759 | CYP2C18      | -1.440200648 |
| 2,760 | SF3A3        | -1.440169803 |
| 2,761 | SCLY         | -1.440163946 |
| 2,762 | ESAM         | -1.440148615 |
| 2,763 | LHCGR        | -1.440116646 |
| 2,764 | EPS15L1      | -1.440016973 |
| 2,765 | NS3TP1       | -1.439509003 |

|       |            |              |
|-------|------------|--------------|
| 2,766 | ARS        | -1.439343786 |
| 2,767 | C6orf58    | -1.439286729 |
| 2,768 | ZNF277     | -1.439249003 |
| 2,769 | SIAHBP1    | -1.439090606 |
| 2,770 | RIT2       | -1.438853173 |
| 2,771 | SC5DL      | -1.438684144 |
| 2,772 | LOC90522   | -1.438437304 |
| 2,773 | GOLGA5     | -1.438405752 |
| 2,774 | E46L       | -1.438260735 |
| 2,775 | LZIC       | -1.438256157 |
| 2,776 | ADAM30     | -1.437827346 |
| 2,777 | FLJ35776   | -1.437411287 |
| 2,778 | ATG4C      | -1.437377172 |
| 2,779 | HUMAUANTIG | -1.436951321 |
| 2,780 | PTPRK      | -1.436705904 |
| 2,781 | FAF1       | -1.436610421 |
| 2,782 | ADHFE1     | -1.436235265 |
| 2,783 | SQRDL      | -1.436199339 |
| 2,784 | C9ORF88    | -1.436053666 |
| 2,785 | DSCR1      | -1.435906421 |
| 2,786 | TJP3       | -1.435803469 |
| 2,787 | RANBP1     | -1.435751384 |
| 2,788 | ZNF254     | -1.435695809 |
| 2,789 | ALDH3A1    | -1.435412671 |
| 2,790 | FAM40B     | -1.435339797 |
| 2,791 | C11ORF23   | -1.435168945 |
| 2,792 | MGC33309   | -1.434879186 |
| 2,793 | KLK5       | -1.434716786 |
| 2,794 | PLA2G4A    | -1.434706242 |
| 2,795 | MPZL1      | -1.434479151 |
| 2,796 | MLC1       | -1.434471348 |
| 2,797 | ZNF268     | -1.4342559   |
| 2,798 | IGJ        | -1.434059352 |
| 2,799 | CKAP4      | -1.433623571 |
| 2,800 | GYS2       | -1.433386955 |
| 2,801 | CSTA       | -1.433145909 |
| 2,802 | NFKBIB     | -1.433142659 |
| 2,803 | CGI-04     | -1.433109205 |
| 2,804 | TEGT       | -1.433049991 |
| 2,805 | LHX2       | -1.433009292 |
| 2,806 | DOC2B      | -1.432875074 |
| 2,807 | ABCG5      | -1.432860444 |
| 2,808 | KIAA0657   | -1.432852175 |
| 2,809 | MGC24039   | -1.432373812 |
| 2,810 | POLR3C     | -1.432351889 |
| 2,811 | JAG1       | -1.432202924 |
| 2,812 | SMARCAL1   | -1.432175412 |

|       |                  |              |
|-------|------------------|--------------|
| 2,813 | <i>LOC154288</i> | -1.432158539 |
| 2,814 | <i>MUTYH</i>     | -1.432121889 |
| 2,815 | <i>FDFT1</i>     | -1.432000717 |
| 2,816 | <i>FLJ10006</i>  | -1.431848959 |
| 2,817 | <i>C22ORF4</i>   | -1.431835466 |
| 2,818 | <i>KIAA0241</i>  | -1.431739092 |
| 2,819 | <i>BAMBI</i>     | -1.431735134 |
| 2,820 | <i>CHD6</i>      | -1.431724386 |
| 2,821 | <i>COPEB</i>     | -1.431718584 |
| 2,822 | <i>TMSB10</i>    | -1.430991169 |
| 2,823 | <i>RDS</i>       | -1.430862188 |
| 2,824 | <i>OR4K14</i>    | -1.430836406 |
| 2,825 | <i>ILT8</i>      | -1.430819381 |
| 2,826 | <i>LOC391123</i> | -1.430635149 |
| 2,827 | <i>WFDC8</i>     | -1.430436364 |
| 2,828 | <i>ZNF233</i>    | -1.430154579 |
| 2,829 | <i>FLJ11220</i>  | -1.430121052 |
| 2,830 | <i>C9ORF12</i>   | -1.42996106  |
| 2,831 | <i>C6ORF48</i>   | -1.429882889 |
| 2,832 | <i>ZNF175</i>    | -1.429757073 |
| 2,833 | <i>SMU1</i>      | -1.429718993 |
| 2,834 | <i>ACVR1C</i>    | -1.429516467 |
| 2,835 | <i>HRK</i>       | -1.42950442  |
| 2,836 | <i>TGM1</i>      | -1.429434863 |
| 2,837 | <i>IFIT4</i>     | -1.429130187 |
| 2,838 | <i>NKIRAS2</i>   | -1.42909189  |
| 2,839 | <i>MBD5</i>      | -1.429012805 |
| 2,840 | <i>ASGR2</i>     | -1.428873331 |
| 2,841 | <i>AP1B1</i>     | -1.428563599 |
| 2,842 | <i>CLDN5</i>     | -1.428379757 |
| 2,843 | <i>FLJ10853</i>  | -1.428192811 |
| 2,844 | <i>RCOR1</i>     | -1.428003243 |
| 2,845 | <i>LOC550631</i> | -1.427923819 |
| 2,846 | <i>AFMID</i>     | -1.427691801 |
| 2,847 | <i>BTAF1</i>     | -1.427670504 |
| 2,848 | <i>UGT2B11</i>   | -1.427431791 |
| 2,849 | <i>CALM3</i>     | -1.427314628 |
| 2,850 | <i>LOC388135</i> | -1.427140334 |
| 2,851 | <i>LONP</i>      | -1.426580387 |
| 2,852 | <i>TRIM60</i>    | -1.426533749 |
| 2,853 | <i>C7ORF35</i>   | -1.426442651 |
| 2,854 | <i>MGC34837</i>  | -1.426335567 |
| 2,855 | <i>ILK</i>       | -1.426280709 |
| 2,856 | <i>ZNF330</i>    | -1.426111495 |
| 2,857 | <i>NCR3</i>      | -1.42572331  |
| 2,858 | <i>LRBA</i>      | -1.425709676 |
| 2,859 | <i>C10ORF24</i>  | -1.425476647 |

|       |                  |              |
|-------|------------------|--------------|
| 2,860 | <i>ATP6V0A4</i>  | -1.425397246 |
| 2,861 | <i>SH3GLB2</i>   | -1.425208605 |
| 2,862 | <i>DLC2</i>      | -1.425101988 |
| 2,863 | <i>TGIF2LY</i>   | -1.424842229 |
| 2,864 | <i>KIAA0863</i>  | -1.424701697 |
| 2,865 | <i>LOC91120</i>  | -1.424581579 |
| 2,866 | <i>NIBP</i>      | -1.424575924 |
| 2,867 | <i>PPT1</i>      | -1.424571181 |
| 2,868 | <i>STX1A</i>     | -1.423838921 |
| 2,869 | <i>SLCO5A1</i>   | -1.423838921 |
| 2,870 | <i>C14ORF142</i> | -1.423804265 |
| 2,871 | <i>HAND2</i>     | -1.423735855 |
| 2,872 | <i>LOC130074</i> | -1.423678634 |
| 2,873 | <i>ADAM19</i>    | -1.42352442  |
| 2,874 | <i>FLJ12700</i>  | -1.423364851 |
| 2,875 | <i>TRAM1</i>     | -1.42324311  |
| 2,876 | <i>SLC4A1AP</i>  | -1.422942405 |
| 2,877 | <i>SDC2</i>      | -1.422538029 |
| 2,878 | <i>KRT15</i>     | -1.422377146 |
| 2,879 | <i>SERPINA1</i>  | -1.422318947 |
| 2,880 | <i>C14ORF58</i>  | -1.421991916 |
| 2,881 | <i>RCOR2</i>     | -1.421937144 |
| 2,882 | <i>FLJ22531</i>  | -1.421744292 |
| 2,883 | <i>PIP3-E</i>    | -1.421683874 |
| 2,884 | <i>PRPF19</i>    | -1.421433863 |
| 2,885 | <i>PPP1R3B</i>   | -1.421408842 |
| 2,886 | <i>DDHD1</i>     | -1.421321284 |
| 2,887 | <i>RBMY1E</i>    | -1.421299254 |
| 2,888 | <i>SYTL3</i>     | -1.421298357 |
| 2,889 | <i>CCL27</i>     | -1.421229798 |
| 2,890 | <i>PTPRN</i>     | -1.421223265 |
| 2,891 | <i>CLCN4</i>     | -1.421184953 |
| 2,892 | <i>ATE1</i>      | -1.421156375 |
| 2,893 | <i>C20ORF96</i>  | -1.421047227 |
| 2,894 | <i>STK29</i>     | -1.42100261  |
| 2,895 | <i>ACTR5</i>     | -1.42097389  |
| 2,896 | <i>IL6ST</i>     | -1.420870909 |
| 2,897 | <i>DGKZ</i>      | -1.420700442 |
| 2,898 | <i>MGC35558</i>  | -1.420612911 |
| 2,899 | <i>CIZ1</i>      | -1.420605794 |
| 2,900 | <i>FCHO1</i>     | -1.420591471 |
| 2,901 | <i>BCL6</i>      | -1.420536561 |
| 2,902 | <i>FIP1L1</i>    | -1.420518083 |
| 2,903 | <i>ZNFN1A5</i>   | -1.420472118 |
| 2,904 | <i>ADAMTS5</i>   | -1.42041159  |
| 2,905 | <i>BLOC1S3</i>   | -1.42014949  |
| 2,906 | <i>SEN5</i>      | -1.420084665 |

|       |                      |              |
|-------|----------------------|--------------|
| 2,907 | <i>FTL</i>           | -1.419941896 |
| 2,908 | <i>NSG-X</i>         | -1.419869346 |
| 2,909 | <i>FLJ30934</i>      | -1.419765805 |
| 2,910 | <i>TEPP</i>          | -1.419765805 |
| 2,911 | <i>DLG5</i>          | -1.419615096 |
| 2,912 | <i>MTMR6</i>         | -1.419551441 |
| 2,913 | <i>SRD5A2</i>        | -1.419504338 |
| 2,914 | <i>FLJ34658</i>      | -1.419504338 |
| 2,915 | <i>EREG</i>          | -1.419280973 |
| 2,916 | <i>UNC45B</i>        | -1.418953283 |
| 2,917 | <i>CSF1R</i>         | -1.418510978 |
| 2,918 | <i>FBXL2</i>         | -1.418491316 |
| 2,919 | <i>MGC35402</i>      | -1.418443602 |
| 2,920 | <i>HSPC132</i>       | -1.418424899 |
| 2,921 | <i>MGC4659</i>       | -1.418177879 |
| 2,922 | <i>SAP18</i>         | -1.418020171 |
| 2,923 | <i>TRAPPC2</i>       | -1.417936558 |
| 2,924 | <i>PAPLN</i>         | -1.417604943 |
| 2,925 | <i>ANKRD16</i>       | -1.417449414 |
| 2,926 | <i>EFNA4</i>         | -1.417211385 |
| 2,927 | <i>PSMD8</i>         | -1.417177598 |
| 2,928 | <i>PRSS22</i>        | -1.417095232 |
| 2,929 | <i>LOC100130958</i>  | -1.416975317 |
| 2,930 | <i>C9ORF41</i>       | -1.416901587 |
| 2,931 | <i>GLRA3</i>         | -1.416652481 |
| 2,932 | <i>C1QBP</i>         | -1.416645823 |
| 2,933 | <i>UBL5</i>          | -1.416611165 |
| 2,934 | <i>PPM1G</i>         | -1.416587315 |
| 2,935 | <i>HARS</i>          | -1.416575409 |
| 2,936 | <i>FKBP10</i>        | -1.416496357 |
| 2,937 | <i>TRIM33</i>        | -1.416414768 |
| 2,938 | <i>MMP26</i>         | -1.416291584 |
| 2,939 | <i>SUMF1</i>         | -1.416241837 |
| 2,940 | <i>FLJ30834</i>      | -1.416197906 |
| 2,941 | <i>STAF65(GAMMA)</i> | -1.416192582 |
| 2,942 | <i>THOC4</i>         | -1.416096874 |
| 2,943 | <i>FRK</i>           | -1.41598688  |
| 2,944 | <i>AMACO</i>         | -1.415822496 |
| 2,945 | <i>BMP6</i>          | -1.41558577  |
| 2,946 | <i>TBC1D5</i>        | -1.415548616 |
| 2,947 | <i>LRRC20</i>        | -1.415357073 |
| 2,948 | <i>FLJ30473</i>      | -1.415210777 |
| 2,949 | <i>OR8G2</i>         | -1.415049717 |
| 2,950 | <i>NDOR1</i>         | -1.414940567 |
| 2,951 | <i>PCSK9</i>         | -1.414763893 |
| 2,952 | <i>CDCA2</i>         | -1.41475201  |
| 2,953 | <i>NBPF8</i>         | -1.414709633 |

|       |                   |              |
|-------|-------------------|--------------|
| 2,954 | <i>FLJ23518</i>   | -1.414546282 |
| 2,955 | <i>RBP5</i>       | -1.414445154 |
| 2,956 | <i>NUDT9</i>      | -1.414272003 |
| 2,957 | <i>FNDC3</i>      | -1.41426376  |
| 2,958 | <i>MGC11102</i>   | -1.414189838 |
| 2,959 | <i>LOC283377</i>  | -1.414143607 |
| 2,960 | <i>EFNA1</i>      | -1.414056639 |
| 2,961 | <i>LOC120224</i>  | -1.413949497 |
| 2,962 | <i>MYH6</i>       | -1.413802317 |
| 2,963 | <i>LRCH4</i>      | -1.413707953 |
| 2,964 | <i>MRPL16</i>     | -1.413672825 |
| 2,965 | <i>C4ORF15</i>    | -1.41355049  |
| 2,966 | <i>HPX</i>        | -1.413496074 |
| 2,967 | <i>CHR415SYT</i>  | -1.413458571 |
| 2,968 | <i>ACTA2</i>      | -1.413166123 |
| 2,969 | <i>LRP10</i>      | -1.412946733 |
| 2,970 | <i>RNF141</i>     | -1.412813126 |
| 2,971 | <i>PYCS</i>       | -1.412675678 |
| 2,972 | <i>RAB18</i>      | -1.412600325 |
| 2,973 | <i>USP42</i>      | -1.412341778 |
| 2,974 | <i>FLJ36766</i>   | -1.412164796 |
| 2,975 | <i>TPARL</i>      | -1.411949386 |
| 2,976 | <i>MGC16372</i>   | -1.411757384 |
| 2,977 | <i>MRPL46</i>     | -1.411752908 |
| 2,978 | <i>MGC26856</i>   | -1.411717898 |
| 2,979 | <i>CRA</i>        | -1.411506657 |
| 2,980 | <i>VPS35</i>      | -1.411442651 |
| 2,981 | <i>FCRH3</i>      | -1.411290564 |
| 2,982 | <i>PROX1</i>      | -1.411122871 |
| 2,983 | <i>ACY1</i>       | -1.411042881 |
| 2,984 | <i>FOXD4L1</i>    | -1.410984798 |
| 2,985 | <i>PLA2G12A</i>   | -1.41082821  |
| 2,986 | <i>RAB11-FIP4</i> | -1.410763631 |
| 2,987 | <i>CDH16</i>      | -1.410467369 |
| 2,988 | <i>HEATR1</i>     | -1.410337739 |
| 2,989 | <i>LOC388649</i>  | -1.409551629 |
| 2,990 | <i>MSRA</i>       | -1.409458983 |
| 2,991 | <i>MEF2A</i>      | -1.409100269 |
| 2,992 | <i>SEMA3A</i>     | -1.408944001 |
| 2,993 | <i>ZNF545</i>     | -1.408873329 |
| 2,994 | <i>KIAA0895</i>   | -1.408799171 |
| 2,995 | <i>PLEKHB1</i>    | -1.408768694 |
| 2,996 | <i>MGC10433</i>   | -1.408744458 |
| 2,997 | <i>ALOX5</i>      | -1.408601647 |
| 2,998 | <i>KIAA2018</i>   | -1.408585198 |
| 2,999 | <i>ACOX3</i>      | -1.408487079 |
| 3,000 | <i>SCD</i>        | -1.408209774 |



|       |                  |              |
|-------|------------------|--------------|
| 3,001 | <i>SERHL2</i>    | -1.408190221 |
| 3,002 | <i>TK1</i>       | -1.408073282 |
| 3,003 | <i>MGC39633</i>  | -1.407892232 |
| 3,004 | <i>FCGR3B</i>    | -1.407880674 |
| 3,005 | <i>ABT1</i>      | -1.407111247 |
| 3,006 | <i>LOC89887</i>  | -1.407070223 |
| 3,007 | <i>ADAT1</i>     | -1.406862543 |
| 3,008 | <i>CDC45L</i>    | -1.406654343 |
| 3,009 | <i>MACROD2</i>   | -1.406526267 |
| 3,010 | <i>FLJ35382</i>  | -1.406355826 |
| 3,011 | <i>ADCK4</i>     | -1.406211201 |
| 3,012 | <i>RABL4</i>     | -1.40596602  |
| 3,013 | <i>KIAA1924</i>  | -1.405764168 |
| 3,014 | <i>FCER1A</i>    | -1.405660415 |
| 3,015 | <i>TFG</i>       | -1.405607362 |
| 3,016 | <i>PDK4</i>      | -1.405476296 |
| 3,017 | <i>FLJ20343</i>  | -1.405473386 |
| 3,018 | <i>HNRPU</i>     | -1.405286047 |
| 3,019 | <i>PIK3C2A</i>   | -1.404918686 |
| 3,020 | <i>BC002942</i>  | -1.404887686 |
| 3,021 | <i>ALDOB</i>     | -1.404260248 |
| 3,022 | <i>TBX21</i>     | -1.404105557 |
| 3,023 | <i>PPP1R16A</i>  | -1.403805389 |
| 3,024 | <i>RIF1</i>      | -1.403775782 |
| 3,025 | <i>SMAD7</i>     | -1.403739112 |
| 3,026 | <i>FLJ10378</i>  | -1.403722915 |
| 3,027 | <i>C14ORF106</i> | -1.403379066 |
| 3,028 | <i>OR5P3</i>     | -1.403316517 |
| 3,029 | <i>C2ORF32</i>   | -1.403292486 |
| 3,030 | <i>OGT</i>       | -1.403262082 |
| 3,031 | <i>PLXNA1</i>    | -1.40304541  |
| 3,032 | <i>RPS18</i>     | -1.402935495 |
| 3,033 | <i>PPT2</i>      | -1.402162168 |
| 3,034 | <i>ZNF404</i>    | -1.401999952 |
| 3,035 | <i>LOC730394</i> | -1.401690721 |
| 3,036 | <i>LOC91937</i>  | -1.401502136 |
| 3,037 | <i>DOC-1R</i>    | -1.401336491 |
| 3,038 | <i>HPGD</i>      | -1.401319931 |
| 3,039 | <i>SULT1C1</i>   | -1.401222104 |
| 3,040 | <i>DUSP7</i>     | -1.400877447 |
| 3,041 | <i>PTHLH</i>     | -1.400839009 |
| 3,042 | <i>SLC12A9</i>   | -1.400812708 |
| 3,043 | <i>SPIN2</i>     | -1.40063599  |
| 3,044 | <i>CD200R</i>    | -1.400444504 |
| 3,045 | <i>TAB3</i>      | -1.400329779 |
| 3,046 | <i>LOC162967</i> | -1.40023014  |
| 3,047 | <i>MGC11349</i>  | -1.400035391 |

|       |                  |              |
|-------|------------------|--------------|
| 3,048 | <i>CCL3L3</i>    | -1.39962034  |
| 3,049 | <i>GCG</i>       | -1.399433373 |
| 3,050 | <i>MGC3121</i>   | -1.399422348 |
| 3,051 | <i>UNQ6122</i>   | -1.399420779 |
| 3,052 | <i>OR8K3</i>     | -1.399402621 |
| 3,053 | <i>RNF167</i>    | -1.399248599 |
| 3,054 | <i>CGN</i>       | -1.398509878 |
| 3,055 | <i>MTHFD2</i>    | -1.398455469 |
| 3,056 | <i>LRRC19</i>    | -1.398197931 |
| 3,057 | <i>ALB</i>       | -1.398169255 |
| 3,058 | <i>GRB7</i>      | -1.398032076 |
| 3,059 | <i>LOC57168</i>  | -1.39777234  |
| 3,060 | <i>ACAS2L</i>    | -1.397621727 |
| 3,061 | <i>MGC35118</i>  | -1.397360224 |
| 3,062 | <i>GA17</i>      | -1.397239473 |
| 3,063 | <i>QARS</i>      | -1.397107389 |
| 3,064 | <i>AKAP2</i>     | -1.396767252 |
| 3,065 | <i>LOC387921</i> | -1.396746292 |
| 3,066 | <i>LOC400673</i> | -1.396581948 |
| 3,067 | <i>KLHDC2</i>    | -1.396494647 |
| 3,068 | <i>ZNF324</i>    | -1.396452694 |
| 3,069 | <i>TECTB</i>     | -1.39640916  |
| 3,070 | <i>ZIC5</i>      | -1.396379655 |
| 3,071 | <i>SORCS2</i>    | -1.396278684 |
| 3,072 | <i>FLJ25952</i>  | -1.396278662 |
| 3,073 | <i>LPA</i>       | -1.396200371 |
| 3,074 | <i>FLJ10774</i>  | -1.396131513 |
| 3,075 | <i>P29</i>       | -1.39603045  |
| 3,076 | <i>TCF4</i>      | -1.395954342 |
| 3,077 | <i>CAMK1G</i>    | -1.395930533 |
| 3,078 | <i>NS</i>        | -1.395898187 |
| 3,079 | <i>PDIR</i>      | -1.39574642  |
| 3,080 | <i>SLC7A1</i>    | -1.395586159 |
| 3,081 | <i>KLK6</i>      | -1.395396722 |
| 3,082 | <i>MGC5178</i>   | -1.39504797  |
| 3,083 | <i>PHF3</i>      | -1.394983372 |
| 3,084 | <i>MTBP</i>      | -1.39492889  |
| 3,085 | <i>ZDHHC5</i>    | -1.394908079 |
| 3,086 | <i>MGC24137</i>  | -1.394861391 |
| 3,087 | <i>FBL</i>       | -1.394713993 |
| 3,088 | <i>RGS2</i>      | -1.394684594 |
| 3,089 | <i>C20ORF30</i>  | -1.394668815 |
| 3,090 | <i>MGC61598</i>  | -1.394259052 |
| 3,091 | <i>TNFSF10</i>   | -1.393999091 |
| 3,092 | <i>SH3D19</i>    | -1.393841042 |
| 3,093 | <i>RWDD3</i>     | -1.393818684 |
| 3,094 | <i>MLPH</i>      | -1.393712725 |

|       |                      |              |
|-------|----------------------|--------------|
| 3,095 | <i>LOC123169</i>     | -1.393423928 |
| 3,096 | <i>WISP3</i>         | -1.393315061 |
| 3,097 | <i>FASTK</i>         | -1.393168896 |
| 3,098 | <i>C14ORF49</i>      | -1.393062933 |
| 3,099 | <i>BLMH</i>          | -1.393037409 |
| 3,100 | <i>KBTBD2</i>        | -1.392895846 |
| 3,101 | <i>FLJ35709</i>      | -1.392843213 |
| 3,102 | <i>LOC388815</i>     | -1.392580228 |
| 3,103 | <i>T</i>             | -1.391834433 |
| 3,104 | <i>NDUFB5</i>        | -1.391373157 |
| 3,105 | <i>C19ORF29</i>      | -1.391358968 |
| 3,106 | <i>FLJ32940</i>      | -1.391046991 |
| 3,107 | <i>FLJ21128</i>      | -1.390919374 |
| 3,108 | <i>GP1BA</i>         | -1.390819091 |
| 3,109 | <i>PPP2CA</i>        | -1.39081094  |
| 3,110 | <i>LOC283849</i>     | -1.390761168 |
| 3,111 | <i>AEGP</i>          | -1.390751813 |
| 3,112 | <i>YES1</i>          | -1.390732158 |
| 3,113 | <i>DKFZP566D1346</i> | -1.390133864 |
| 3,114 | <i>DGKQ</i>          | -1.390082361 |
| 3,115 | <i>HIP14</i>         | -1.390035281 |
| 3,116 | <i>MEF2D</i>         | -1.389917201 |
| 3,117 | <i>LOC90529</i>      | -1.389751912 |
| 3,118 | <i>KIAA1107</i>      | -1.389730689 |
| 3,119 | <i>COX7B</i>         | -1.389336955 |
| 3,120 | <i>SLCO1C1</i>       | -1.389209018 |
| 3,121 | <i>MEF2D</i>         | -1.388933952 |
| 3,122 | <i>PXK</i>           | -1.388748009 |
| 3,123 | <i>ANXA8L1</i>       | -1.388633887 |
| 3,124 | <i>OGN</i>           | -1.388630114 |
| 3,125 | <i>ZNF518</i>        | -1.388375317 |
| 3,126 | <i>OR4F6</i>         | -1.388301583 |
| 3,127 | <i>HH114</i>         | -1.388294085 |
| 3,128 | <i>OR5H1</i>         | -1.388272893 |
| 3,129 | <i>FLJ10871</i>      | -1.388053377 |
| 3,130 | <i>HSPC196</i>       | -1.388045003 |
| 3,131 | <i>ARL6IP5</i>       | -1.3879424   |
| 3,132 | <i>GUP1</i>          | -1.387725437 |
| 3,133 | <i>FLJ22353</i>      | -1.387337548 |
| 3,134 | <i>PIM2</i>          | -1.387267217 |
| 3,135 | <i>RPP25</i>         | -1.387010015 |
| 3,136 | <i>RASL12</i>        | -1.386870256 |
| 3,137 | <i>LYAR</i>          | -1.386658704 |
| 3,138 | <i>FLJ20647</i>      | -1.386625639 |
| 3,139 | <i>GDI1</i>          | -1.386575437 |
| 3,140 | <i>IFNGR1</i>        | -1.386574055 |
| 3,141 | <i>FLJ20847</i>      | -1.38641877  |

|       |               |              |
|-------|---------------|--------------|
| 3,142 | CRABP2        | -1.386348423 |
| 3,143 | FOX11         | -1.386345561 |
| 3,144 | DCTN6         | -1.386142206 |
| 3,145 | WDR13         | -1.38609883  |
| 3,146 | ASB15         | -1.386032027 |
| 3,147 | LOC114926     | -1.385972099 |
| 3,148 | TRIF          | -1.385853205 |
| 3,149 | MGC17624      | -1.385655816 |
| 3,150 | METAP2        | -1.38549965  |
| 3,151 | FBXL18        | -1.385483761 |
| 3,152 | OR6K2         | -1.385371758 |
| 3,153 | MME           | -1.385351079 |
| 3,154 | YAP1          | -1.385217983 |
| 3,155 | DHX9          | -1.385047502 |
| 3,156 | PDE8A         | -1.385020681 |
| 3,157 | MAPK12        | -1.38484339  |
| 3,158 | SLC22A14      | -1.38474023  |
| 3,159 | LOC388818     | -1.384605576 |
| 3,160 | CKN1          | -1.384356573 |
| 3,161 | LCE2A         | -1.384308603 |
| 3,162 | ARF1          | -1.383949067 |
| 3,163 | AFTIPHILIN    | -1.383774164 |
| 3,164 | RIMS4         | -1.383543126 |
| 3,165 | SLC26A11      | -1.383392569 |
| 3,166 | DKFZP434A0131 | -1.383362793 |
| 3,167 | SPANX-N1      | -1.383286339 |
| 3,168 | U5-116KD      | -1.383246357 |
| 3,169 | C6ORF32       | -1.382936193 |
| 3,170 | SLC13A1       | -1.382655008 |
| 3,171 | FLJ38968      | -1.382532154 |
| 3,172 | GJA12         | -1.382386001 |
| 3,173 | NRM           | -1.382314186 |
| 3,174 | POU6F1        | -1.382188816 |
| 3,175 | SPAG4L        | -1.382175842 |
| 3,176 | ZNF45         | -1.382027775 |
| 3,177 | TAS2R1        | -1.381980781 |
| 3,178 | TBX20         | -1.381879351 |
| 3,179 | FLJ11806      | -1.381722461 |
| 3,180 | SH3MD1        | -1.381646099 |
| 3,181 | LOC388595     | -1.381632539 |
| 3,182 | FLJ10292      | -1.38149433  |
| 3,183 | ATP6AP2       | -1.381266516 |
| 3,184 | HIP1          | -1.381248391 |
| 3,185 | BTEB1         | -1.381191259 |
| 3,186 | RTN1          | -1.380562445 |
| 3,187 | HSPC154       | -1.380538246 |
| 3,188 | KCNH2         | -1.380302227 |

|       |                  |              |
|-------|------------------|--------------|
| 3,189 | <i>FLJ22573</i>  | -1.380289947 |
| 3,190 | <i>FLJ22175</i>  | -1.380287186 |
| 3,191 | <i>AURKC</i>     | -1.380195634 |
| 3,192 | <i>CGI-143</i>   | -1.380189997 |
| 3,193 | <i>DDX3Y</i>     | -1.379226678 |
| 3,194 | <i>KNTC1</i>     | -1.379041278 |
| 3,195 | <i>FUT11</i>     | -1.37893977  |
| 3,196 | <i>LOC92689</i>  | -1.378905283 |
| 3,197 | <i>DAPK3</i>     | -1.378460652 |
| 3,198 | <i>ZNRF4</i>     | -1.37840232  |
| 3,199 | <i>C21ORF127</i> | -1.37778871  |
| 3,200 | <i>MSI1</i>      | -1.377740344 |
| 3,201 | <i>FGFR4</i>     | -1.377725002 |
| 3,202 | <i>CRNKL1</i>    | -1.377607905 |
| 3,203 | <i>DNAJB1</i>    | -1.377536693 |
| 3,204 | <i>FLJ20298</i>  | -1.377496767 |
| 3,205 | <i>SCA7</i>      | -1.377174733 |
| 3,206 | <i>CENTG1</i>    | -1.377111565 |
| 3,207 | <i>SLC7A7</i>    | -1.376912905 |
| 3,208 | <i>NAALAD2</i>   | -1.376912807 |
| 3,209 | <i>PDGFD</i>     | -1.376778371 |
| 3,210 | <i>NEK8</i>      | -1.376758032 |
| 3,211 | <i>SNIP</i>      | -1.376719235 |
| 3,212 | <i>FCGBP</i>     | -1.376657716 |
| 3,213 | <i>MGC10993</i>  | -1.376292856 |
| 3,214 | <i>AP2E</i>      | -1.376156324 |
| 3,215 | <i>MGC20262</i>  | -1.375974504 |
| 3,216 | <i>HNRPC</i>     | -1.375921636 |
| 3,217 | <i>USP21</i>     | -1.375763655 |
| 3,218 | <i>OR4B1</i>     | -1.375720071 |
| 3,219 | <i>BG1</i>       | -1.375681658 |
| 3,220 | <i>TES</i>       | -1.375634106 |
| 3,221 | <i>SMARCD2</i>   | -1.375577009 |
| 3,222 | <i>LOC129530</i> | -1.375567911 |
| 3,223 | <i>CST2</i>      | -1.375530775 |
| 3,224 | <i>KCNF1</i>     | -1.375195806 |
| 3,225 | <i>TTC7A</i>     | -1.375049956 |
| 3,226 | <i>PAX2</i>      | -1.374872038 |
| 3,227 | <i>IFNG</i>      | -1.374868308 |
| 3,228 | <i>UNQ564</i>    | -1.374694989 |
| 3,229 | <i>GML</i>       | -1.37468557  |
| 3,230 | <i>OR4A16</i>    | -1.374671725 |
| 3,231 | <i>PL6</i>       | -1.374639207 |
| 3,232 | <i>SGCE</i>      | -1.374440806 |
| 3,233 | <i>SNX3</i>      | -1.374439059 |
| 3,234 | <i>SYT3</i>      | -1.374364094 |
| 3,235 | <i>BMX</i>       | -1.374064291 |

|       |               |              |
|-------|---------------|--------------|
| 3,236 | ZNF345        | -1.373956115 |
| 3,237 | GNA12         | -1.373810247 |
| 3,238 | ALX3          | -1.373550947 |
| 3,239 | MAG           | -1.373219654 |
| 3,240 | RRAGD         | -1.373176731 |
| 3,241 | RPS17         | -1.37301466  |
| 3,242 | FBXL20        | -1.372814195 |
| 3,243 | FLJ31810      | -1.372673612 |
| 3,244 | DKFZP434P162  | -1.372529799 |
| 3,245 | NYREN18       | -1.372082396 |
| 3,246 | ATP6V1A       | -1.371830053 |
| 3,247 | RCN2          | -1.371777193 |
| 3,248 | CDW92         | -1.371760402 |
| 3,249 | MYH8          | -1.37129751  |
| 3,250 | CDC91L1       | -1.371197438 |
| 3,251 | FLJ21106      | -1.371158285 |
| 3,252 | GOLGIN-67     | -1.370952798 |
| 3,253 | NOMO2         | -1.370816016 |
| 3,254 | DEAF1         | -1.370786245 |
| 3,255 | CRBN          | -1.370658769 |
| 3,256 | DLX3          | -1.370622907 |
| 3,257 | MRPL19        | -1.370561972 |
| 3,258 | NEBL          | -1.370459542 |
| 3,259 | MSRB          | -1.370328355 |
| 3,260 | PCDH19        | -1.370216583 |
| 3,261 | SLC30A7       | -1.370141232 |
| 3,262 | AP1GBP1       | -1.369929642 |
| 3,263 | C14ORF133     | -1.369637112 |
| 3,264 | COQ7          | -1.369586967 |
| 3,265 | ARHGEF15      | -1.369576775 |
| 3,266 | FLJ32894      | -1.369510387 |
| 3,267 | SPHK1         | -1.369433365 |
| 3,268 | FLJ33977      | -1.369080712 |
| 3,269 | U2AF1         | -1.369017955 |
| 3,270 | GPR51         | -1.368924652 |
| 3,271 | MGC14161      | -1.368899885 |
| 3,272 | NDUFV1        | -1.368881368 |
| 3,273 | LOC91614      | -1.368523033 |
| 3,274 | ALS2CR2       | -1.368474019 |
| 3,275 | NTSR1         | -1.368238422 |
| 3,276 | STOML3        | -1.368219213 |
| 3,277 | TMEM33        | -1.368129961 |
| 3,278 | NY-REN-7      | -1.368081286 |
| 3,279 | DKFZP761P0423 | -1.368014359 |
| 3,280 | ANGPT2        | -1.368012738 |
| 3,281 | ATF7          | -1.367813842 |
| 3,282 | KCTD14        | -1.367803844 |

|       |                      |              |
|-------|----------------------|--------------|
| 3,283 | <i>FLJ25590</i>      | -1.367689634 |
| 3,284 | <i>HSPC016</i>       | -1.367651148 |
| 3,285 | <i>H2AFY2</i>        | -1.367374277 |
| 3,286 | <i>ALG5</i>          | -1.367002147 |
| 3,287 | <i>CNOT4</i>         | -1.366708544 |
| 3,288 | <i>GMRP-1</i>        | -1.366663306 |
| 3,289 | <i>OR5AN1</i>        | -1.366556708 |
| 3,290 | <i>MKKS</i>          | -1.366520654 |
| 3,291 | <i>MGC2629</i>       | -1.366418357 |
| 3,292 | <i>DKFZP686E2158</i> | -1.366373841 |
| 3,293 | <i>KLRC1</i>         | -1.366296302 |
| 3,294 | <i>C11ORF16</i>      | -1.366262633 |
| 3,295 | <i>APBA2</i>         | -1.366237121 |
| 3,296 | <i>WRN</i>           | -1.365928503 |
| 3,297 | <i>COL4A3</i>        | -1.365813362 |
| 3,298 | <i>TM9SF2</i>        | -1.365774575 |
| 3,299 | <i>TMEM29</i>        | -1.365774575 |
| 3,300 | <i>FLJ41238</i>      | -1.365610936 |
| 3,301 | <i>SAMD9</i>         | -1.365560252 |
| 3,302 | <i>IFIT2</i>         | -1.365498719 |
| 3,303 | <i>ZNF198</i>        | -1.365338519 |
| 3,304 | <i>TOSO</i>          | -1.365226172 |
| 3,305 | <i>TNFRSF25</i>      | -1.365192226 |
| 3,306 | <i>FCGR2B</i>        | -1.364958181 |
| 3,307 | <i>IL8</i>           | -1.364716603 |
| 3,308 | <i>KIAA1201</i>      | -1.364388214 |
| 3,309 | <i>ULK2</i>          | -1.364309412 |
| 3,310 | <i>FLJ10781</i>      | -1.364213278 |
| 3,311 | <i>MGC33365</i>      | -1.363844888 |
| 3,312 | <i>CCL4</i>          | -1.363804607 |
| 3,313 | <i>FLJ20626</i>      | -1.363736115 |
| 3,314 | <i>IMP-2</i>         | -1.363671324 |
| 3,315 | <i>RIF1</i>          | -1.363534655 |
| 3,316 | <i>KIAA1202</i>      | -1.363509432 |
| 3,317 | <i>SIRT5</i>         | -1.363461451 |
| 3,318 | <i>ZNF610</i>        | -1.363386651 |
| 3,319 | <i>MYBPC2</i>        | -1.363184339 |
| 3,320 | <i>STX7</i>          | -1.362280092 |
| 3,321 | <i>AMMECR1</i>       | -1.362280092 |
| 3,322 | <i>CRYGC</i>         | -1.36226271  |
| 3,323 | <i>LOC204474</i>     | -1.362072931 |
| 3,324 | <i>MAX</i>           | -1.361878143 |
| 3,325 | <i>DMXL1</i>         | -1.361707831 |
| 3,326 | <i>ZAK</i>           | -1.361611011 |
| 3,327 | <i>PCDHAC1</i>       | -1.36126767  |
| 3,328 | <i>STX1B2</i>        | -1.361167599 |
| 3,329 | <i>ZNF154</i>        | -1.360978113 |

|       |                      |              |
|-------|----------------------|--------------|
| 3,330 | <i>FLJ14001</i>      | -1.360903928 |
| 3,331 | <i>ASB2</i>          | -1.360877666 |
| 3,332 | <i>MGC4728</i>       | -1.360718508 |
| 3,333 | <i>STC2</i>          | -1.360560772 |
| 3,334 | <i>FANCE</i>         | -1.360530613 |
| 3,335 | <i>SIRT1</i>         | -1.360165595 |
| 3,336 | <i>PRKWNK1</i>       | -1.359894219 |
| 3,337 | <i>LOC399814</i>     | -1.359630835 |
| 3,338 | <i>PSMD7</i>         | -1.359611067 |
| 3,339 | <i>MGC1136</i>       | -1.358961555 |
| 3,340 | <i>HSPC023</i>       | -1.35890189  |
| 3,341 | <i>LOC134492</i>     | -1.358806925 |
| 3,342 | <i>DEFB126</i>       | -1.358629752 |
| 3,343 | <i>TESK2</i>         | -1.358529696 |
| 3,344 | <i>UMPS</i>          | -1.358513973 |
| 3,345 | <i>LOC51244</i>      | -1.358445389 |
| 3,346 | <i>APOL6</i>         | -1.358252644 |
| 3,347 | <i>RNF151</i>        | -1.357357913 |
| 3,348 | <i>SGNE1</i>         | -1.35690298  |
| 3,349 | <i>GCKR</i>          | -1.356902228 |
| 3,350 | <i>MICL</i>          | -1.356741426 |
| 3,351 | <i>POLDIP3</i>       | -1.356395911 |
| 3,352 | <i>ZNF2</i>          | -1.356311967 |
| 3,353 | <i>MDH1</i>          | -1.355950079 |
| 3,354 | <i>HLA-B</i>         | -1.35531167  |
| 3,355 | <i>FLJ32310</i>      | -1.355220842 |
| 3,356 | <i>AP2M1</i>         | -1.355216592 |
| 3,357 | <i>C10ORF35</i>      | -1.354949531 |
| 3,358 | <i>EEF1D</i>         | -1.354718712 |
| 3,359 | <i>BSPRY</i>         | -1.354580458 |
| 3,360 | <i>POLD2</i>         | -1.35443198  |
| 3,361 | <i>C1orf178</i>      | -1.354409297 |
| 3,362 | <i>ARRB1</i>         | -1.354237469 |
| 3,363 | <i>EIF4E2</i>        | -1.354147596 |
| 3,364 | <i>DKFZP667B0210</i> | -1.35403069  |
| 3,365 | <i>FBXW8</i>         | -1.353809846 |
| 3,366 | <i>NQO2</i>          | -1.353808255 |
| 3,367 | <i>RYR2</i>          | -1.353679116 |
| 3,368 | <i>DSG2</i>          | -1.353664123 |
| 3,369 | <i>GNAQ</i>          | -1.353338855 |
| 3,370 | <i>SH3GLB1</i>       | -1.352809291 |
| 3,371 | <i>APEH</i>          | -1.352803351 |
| 3,372 | <i>ABCD3</i>         | -1.352685268 |
| 3,373 | <i>LOC388403</i>     | -1.352684148 |
| 3,374 | <i>LOC55831</i>      | -1.352684148 |
| 3,375 | <i>MGC14386</i>      | -1.35248379  |
| 3,376 | <i>FLNA</i>          | -1.35192934  |



|       |                  |              |
|-------|------------------|--------------|
| 3,377 | <i>BICC1</i>     | -1.351867356 |
| 3,378 | <i>TFIP11</i>    | -1.351865021 |
| 3,379 | <i>SCN4B</i>     | -1.351827699 |
| 3,380 | <i>LOC340351</i> | -1.351749304 |
| 3,381 | <i>C5ORF15</i>   | -1.351702606 |
| 3,382 | <i>AMOT</i>      | -1.351372971 |
| 3,383 | <i>EMP3</i>      | -1.351308031 |
| 3,384 | <i>C19orf71</i>  | -1.350942551 |
| 3,385 | <i>ZNF224</i>    | -1.350852525 |
| 3,386 | <i>RDX</i>       | -1.350709331 |
| 3,387 | <i>LOC219527</i> | -1.350475657 |
| 3,388 | <i>NDUFV3</i>    | -1.350428674 |
| 3,389 | <i>NDUFV3</i>    | -1.350428674 |
| 3,390 | <i>TOE1</i>      | -1.350397824 |
| 3,391 | <i>HSBP1</i>     | -1.350250099 |
| 3,392 | <i>HYAL3</i>     | -1.350242315 |
| 3,393 | <i>SLC6A5</i>    | -1.350075339 |
| 3,394 | <i>PYM</i>       | -1.350006406 |
| 3,395 | <i>BPIL3</i>     | -1.349922164 |
| 3,396 | <i>ZFYVE1</i>    | -1.34989884  |
| 3,397 | <i>MGC5178</i>   | -1.349768815 |
| 3,398 | <i>OR2C3</i>     | -1.349530301 |
| 3,399 | <i>KIAA0478</i>  | -1.349528057 |
| 3,400 | <i>CALB1</i>     | -1.349497293 |
| 3,401 | <i>FLJ32452</i>  | -1.349455529 |
| 3,402 | <i>TRAG3</i>     | -1.349293592 |
| 3,403 | <i>NUP37</i>     | -1.349107724 |
| 3,404 | <i>RFP</i>       | -1.348785906 |
| 3,405 | <i>PFDN4</i>     | -1.348632351 |
| 3,406 | <i>NCB5OR</i>    | -1.348326187 |
| 3,407 | <i>CNDP1</i>     | -1.34829284  |
| 3,408 | <i>LOC389170</i> | -1.347832591 |
| 3,409 | <i>C9ORF78</i>   | -1.347664261 |
| 3,410 | <i>FLJ14800</i>  | -1.347574493 |
| 3,411 | <i>MYST3</i>     | -1.347531276 |
| 3,412 | <i>TPSB1</i>     | -1.347450469 |
| 3,413 | <i>FAM3B</i>     | -1.347390218 |
| 3,414 | <i>D2LIC</i>     | -1.34726154  |
| 3,415 | <i>BRE</i>       | -1.346941541 |
| 3,416 | <i>GALGT2</i>    | -1.346828087 |
| 3,417 | <i>DNAJC14</i>   | -1.34669959  |
| 3,418 | <i>LAT</i>       | -1.346653499 |
| 3,419 | <i>LLGL2</i>     | -1.346563972 |
| 3,420 | <i>IFNAR1</i>    | -1.346394342 |
| 3,421 | <i>DXYS155E</i>  | -1.346315226 |
| 3,422 | <i>KIF1A</i>     | -1.346268607 |
| 3,423 | <i>LYZ</i>       | -1.346072229 |

|       |               |              |
|-------|---------------|--------------|
| 3,424 | MAP3K4        | -1.346060223 |
| 3,425 | IER3          | -1.345817416 |
| 3,426 | EVA1          | -1.344946816 |
| 3,427 | MIPEP         | -1.344766866 |
| 3,428 | DKFZP434G0625 | -1.344616363 |
| 3,429 | SPANXB1       | -1.344522037 |
| 3,430 | PSMC3         | -1.344338554 |
| 3,431 | FLJ22353      | -1.344330337 |
| 3,432 | PCDHA10       | -1.344134542 |
| 3,433 | CSPG6         | -1.344132918 |
| 3,434 | FLJ20531      | -1.343642716 |
| 3,435 | KCTD16        | -1.343605196 |
| 3,436 | CHX10         | -1.343531425 |
| 3,437 | FLJ22635      | -1.343491551 |
| 3,438 | PDE11A        | -1.342803453 |
| 3,439 | HGFAC         | -1.342757745 |
| 3,440 | SEC10L1       | -1.34263465  |
| 3,441 | OR2AT4        | -1.342590458 |
| 3,442 | RPS6KA6       | -1.342351503 |
| 3,443 | OR1S2         | -1.341980917 |
| 3,444 | PRO1855       | -1.341951445 |
| 3,445 | KIF3A         | -1.341849631 |
| 3,446 | PLCZ1         | -1.341766889 |
| 3,447 | FLJ38426      | -1.341540833 |
| 3,448 | LY64          | -1.341467657 |
| 3,449 | RP2           | -1.341366294 |
| 3,450 | LIMK2         | -1.341348472 |
| 3,451 | CD164         | -1.341169274 |
| 3,452 | SLC28A2       | -1.340899005 |
| 3,453 | RPIB9         | -1.340679923 |
| 3,454 | LOC493860     | -1.340555264 |
| 3,455 | CHST1         | -1.340473978 |
| 3,456 | ST7L          | -1.340428626 |
| 3,457 | DNCL2A        | -1.340130064 |
| 3,458 | PHGDHL1       | -1.340063627 |
| 3,459 | NUP155        | -1.340011997 |
| 3,460 | NUP155        | -1.340011997 |
| 3,461 | HSPC242       | -1.339957244 |
| 3,462 | LCK           | -1.339708569 |
| 3,463 | RGPD2         | -1.33953185  |
| 3,464 | C9ORF112      | -1.339516775 |
| 3,465 | LRFN4         | -1.339428697 |
| 3,466 | VEST1         | -1.339417499 |
| 3,467 | LRRC4B        | -1.339412837 |
| 3,468 | FLJ20508      | -1.339395691 |
| 3,469 | ALOX15        | -1.339350747 |
| 3,470 | NBPF10        | -1.339264809 |

|       |                  |              |
|-------|------------------|--------------|
| 3,471 | <i>IL24</i>      | -1.338602295 |
| 3,472 | <i>IPO7</i>      | -1.338523722 |
| 3,473 | <i>DRPLA</i>     | -1.338307517 |
| 3,474 | <i>CCL22</i>     | -1.338124285 |
| 3,475 | <i>MRPL53</i>    | -1.338082302 |
| 3,476 | <i>DHX15</i>     | -1.338071393 |
| 3,477 | <i>ACTR3</i>     | -1.337848129 |
| 3,478 | <i>ZFYVE26</i>   | -1.337707846 |
| 3,479 | <i>ANLN</i>      | -1.337518179 |
| 3,480 | <i>PARN</i>      | -1.337515907 |
| 3,481 | <i>PEX6</i>      | -1.337412743 |
| 3,482 | <i>PTTG1</i>     | -1.337372182 |
| 3,483 | <i>HSPH1</i>     | -1.337296006 |
| 3,484 | <i>SETD5</i>     | -1.337207764 |
| 3,485 | <i>MRPL37</i>    | -1.337207764 |
| 3,486 | <i>FEN1</i>      | -1.336912744 |
| 3,487 | <i>LOC729747</i> | -1.336759321 |
| 3,488 | <i>KIAA0157</i>  | -1.336741696 |
| 3,489 | <i>MGC33867</i>  | -1.336437549 |
| 3,490 | <i>SLC34A1</i>   | -1.336347017 |
| 3,491 | <i>MLN</i>       | -1.336036275 |
| 3,492 | <i>LOC145497</i> | -1.335870205 |
| 3,493 | <i>HSMPP8</i>    | -1.335592543 |
| 3,494 | <i>MAWBP</i>     | -1.335549769 |
| 3,495 | <i>GNRH2</i>     | -1.335205307 |
| 3,496 | <i>HIPK1</i>     | -1.335114436 |
| 3,497 | <i>SLC19A1</i>   | -1.334880707 |
| 3,498 | <i>RC3</i>       | -1.334805518 |
| 3,499 | <i>SPOP</i>      | -1.334758469 |
| 3,500 | <i>FLJ20130</i>  | -1.334311458 |
| 3,501 | <i>Polio #1</i>  | -1.334301254 |
| 3,502 | <i>LOC51668</i>  | -1.334236777 |
| 3,503 | <i>KIAA1414</i>  | -1.334057264 |
| 3,504 | <i>FLJ30834</i>  | -1.33383868  |
| 3,505 | <i>INCENP</i>    | -1.333817934 |
| 3,506 | <i>FLJ12748</i>  | -1.333769901 |
| 3,507 | <i>PLEKHA4</i>   | -1.3335545   |
| 3,508 | <i>HBG2</i>      | -1.333262527 |
| 3,509 | <i>EGLN1</i>     | -1.332853549 |
| 3,510 | <i>TRIM22</i>    | -1.332745866 |
| 3,511 | <i>KHDRBS1</i>   | -1.332672234 |
| 3,512 | <i>C19ORF32</i>  | -1.332628697 |
| 3,513 | <i>MXD4</i>      | -1.332620635 |
| 3,514 | <i>DGCR6</i>     | -1.332610627 |
| 3,515 | <i>CD4</i>       | -1.332579796 |
| 3,516 | <i>PTPN13</i>    | -1.332515724 |

|       |                       |              |
|-------|-----------------------|--------------|
| 3,517 | <i>SCTR</i>           | -1.33250365  |
| 3,518 | <i>DKFZP434C0328</i>  | -1.332368532 |
| 3,519 | <i>ZNF510</i>         | -1.332219452 |
| 3,520 | <i>STX8</i>           | -1.332104525 |
| 3,521 | <i>ROBO3</i>          | -1.332054773 |
| 3,522 | <i>CACNG4</i>         | -1.332051604 |
| 3,523 | <i>SFRS3</i>          | -1.331936516 |
| 3,524 | <i>DKFZP434L1717</i>  | -1.331642678 |
| 3,525 | <i>ZNF273</i>         | -1.331637046 |
| 3,526 | <i>LYSAL1</i>         | -1.331512433 |
| 3,527 | <i>FLJ38725</i>       | -1.331449399 |
| 3,528 | <i>CTAG2</i>          | -1.330947217 |
| 3,529 | <i>KRT25A</i>         | -1.330932206 |
| 3,530 | <i>SALL3</i>          | -1.330851005 |
| 3,531 | <i>NECAP2</i>         | -1.330769253 |
| 3,532 | <i>ZNF515</i>         | -1.330511546 |
| 3,533 | <i>HEPH</i>           | -1.329675113 |
| 3,534 | <i>GFER</i>           | -1.329332643 |
| 3,535 | <i>APXL</i>           | -1.329256472 |
| 3,536 | <i>KIAA0963</i>       | -1.329071295 |
| 3,537 | <i>MGC40214</i>       | -1.328989819 |
| 3,538 | <i>SLC38A4</i>        | -1.328910918 |
| 3,539 | <i>MGC20533</i>       | -1.328839845 |
| 3,540 | <i>AMAC1L2</i>        | -1.32882194  |
| 3,541 | <i>SPINT3</i>         | -1.328737998 |
| 3,542 | <i>PSMB6</i>          | -1.328693896 |
| 3,543 | <i>C16ORF5</i>        | -1.328379384 |
| 3,544 | <i>DKFZP761O17121</i> | -1.328327333 |
| 3,545 | <i>FLJ22761</i>       | -1.328310048 |
| 3,546 | <i>ABCD2</i>          | -1.328230463 |
| 3,547 | <i>MGC35154</i>       | -1.327860465 |
| 3,548 | <i>TNRC15</i>         | -1.327820291 |
| 3,549 | <i>DIRAS1</i>         | -1.327757344 |
| 3,550 | <i>SLC25A5</i>        | -1.327688017 |
| 3,551 | <i>FLJ34154</i>       | -1.327113799 |
| 3,552 | <i>POLE3</i>          | -1.327040521 |
| 3,553 | <i>RELB</i>           | -1.327027262 |
| 3,554 | <i>LOC113174</i>      | -1.326950513 |
| 3,555 | <i>VPS52</i>          | -1.326890188 |
| 3,556 | <i>DUX4</i>           | -1.326654884 |
| 3,557 | <i>SPINT2</i>         | -1.326514427 |
| 3,558 | <i>MGAT2</i>          | -1.326450885 |
| 3,559 | <i>GAJ</i>            | -1.326293706 |
| 3,560 | <i>KIAA0460</i>       | -1.326178158 |
| 3,561 | <i>LOC124446</i>      | -1.326149931 |
| 3,562 | <i>BZRAP1</i>         | -1.32602967  |
| 3,563 | <i>NCF2</i>           | -1.325977893 |

|       |                     |              |
|-------|---------------------|--------------|
| 3,564 | <i>RP11-413M3.2</i> | -1.325890228 |
| 3,565 | <i>PNAS-4</i>       | -1.325883131 |
| 3,566 | <i>KIAA1434</i>     | -1.325593932 |
| 3,567 | <i>PPAT</i>         | -1.325447741 |
| 3,568 | <i>CNTF</i>         | -1.325435624 |
| 3,569 | <i>LOC441108</i>    | -1.325396046 |
| 3,570 | <i>CHEK2</i>        | -1.32518052  |
| 3,571 | <i>APITD1</i>       | -1.325078123 |
| 3,572 | <i>FTCD</i>         | -1.325022598 |
| 3,573 | <i>MGC35169</i>     | -1.32493239  |
| 3,574 | <i>SLC16A11</i>     | -1.32475187  |
| 3,575 | <i>NLGN4X</i>       | -1.324735159 |
| 3,576 | <i>PADI6</i>        | -1.324653963 |
| 3,577 | <i>FLJ10970</i>     | -1.324497493 |
| 3,578 | <i>CRYM</i>         | -1.324346833 |
| 3,579 | <i>COX7A1</i>       | -1.324261023 |
| 3,580 | <i>REG1A</i>        | -1.324044989 |
| 3,581 | <i>FLJ21919</i>     | -1.324006554 |
| 3,582 | <i>PC-3</i>         | -1.323978965 |
| 3,583 | <i>DDA3</i>         | -1.323897664 |
| 3,584 | <i>LOC136242</i>    | -1.323879217 |
| 3,585 | <i>SLC4A2</i>       | -1.323533135 |
| 3,586 | <i>C17orf96</i>     | -1.323120906 |
| 3,587 | <i>NCDN</i>         | -1.322971619 |
| 3,588 | <i>TXNDC10</i>      | -1.322934555 |
| 3,589 | <i>GARP</i>         | -1.322892899 |
| 3,590 | <i>DNAH1</i>        | -1.322878294 |
| 3,591 | <i>RAB3IL1</i>      | -1.32274322  |
| 3,592 | <i>ZNF624</i>       | -1.322739454 |
| 3,593 | <i>KCNS2</i>        | -1.322679227 |
| 3,594 | <i>FLJ32921</i>     | -1.32258662  |
| 3,595 | <i>LOC283385</i>    | -1.322463944 |
| 3,596 | <i>CD48</i>         | -1.322250092 |
| 3,597 | <i>TCHHL1</i>       | -1.321893716 |
| 3,598 | <i>SLC7A8</i>       | -1.321802975 |
| 3,599 | <i>LOR</i>          | -1.321336958 |
| 3,600 | <i>SEPN1</i>        | -1.321022329 |
| 3,601 | <i>SCARB1</i>       | -1.321015762 |
| 3,602 | <i>TRPM6</i>        | -1.320908153 |
| 3,603 | <i>FLJ25179</i>     | -1.320855635 |
| 3,604 | <i>CARD11</i>       | -1.320574336 |
| 3,605 | <i>LOC96610</i>     | -1.320458194 |
| 3,606 | <i>ORC1L</i>        | -1.320334784 |
| 3,607 | <i>SCN11A</i>       | -1.319969918 |
| 3,608 | <i>FLJ21827</i>     | -1.319759938 |
| 3,609 | <i>MATP</i>         | -1.319746261 |
| 3,610 | <i>CEP192</i>       | -1.319726016 |

|       |                  |              |
|-------|------------------|--------------|
| 3,611 | <i>HINT1</i>     | -1.319702924 |
| 3,612 | <i>C1ORF21</i>   | -1.319530447 |
| 3,613 | <i>GGT1</i>      | -1.319484128 |
| 3,614 | <i>YAP</i>       | -1.319296528 |
| 3,615 | <i>POU4F3</i>    | -1.319260902 |
| 3,616 | <i>C22ORF18</i>  | -1.319040767 |
| 3,617 | <i>RNF13</i>     | -1.318925031 |
| 3,618 | <i>FOSL2</i>     | -1.318796942 |
| 3,619 | <i>DHRS4L2</i>   | -1.318685449 |
| 3,620 | <i>LHFPL3</i>    | -1.318351413 |
| 3,621 | <i>APOA1BP</i>   | -1.317506866 |
| 3,622 | <i>NFATC1</i>    | -1.317345773 |
| 3,623 | <i>CSNK1G3</i>   | -1.31724018  |
| 3,624 | <i>ADCY3</i>     | -1.317216344 |
| 3,625 | <i>RNF2</i>      | -1.317175468 |
| 3,626 | <i>KIAA0828</i>  | -1.317172822 |
| 3,627 | <i>RCP9</i>      | -1.317103488 |
| 3,628 | <i>FAM110C</i>   | -1.317094756 |
| 3,629 | <i>PEX13</i>     | -1.31708925  |
| 3,630 | <i>ABCA2</i>     | -1.316880647 |
| 3,631 | <i>GALP</i>      | -1.316880296 |
| 3,632 | <i>MAGEA5</i>    | -1.316773925 |
| 3,633 | <i>LOC285193</i> | -1.316690475 |
| 3,634 | <i>G6PC</i>      | -1.316651192 |
| 3,635 | <i>TSC2</i>      | -1.316479835 |
| 3,636 | <i>PTF1A</i>     | -1.316004706 |
| 3,637 | <i>HDAC11</i>    | -1.315701777 |
| 3,638 | <i>UGT1A4</i>    | -1.315660064 |
| 3,639 | <i>MGC16279</i>  | -1.31530929  |
| 3,640 | <i>UPK1A</i>     | -1.315299801 |
| 3,641 | <i>ZNF228</i>    | -1.315298024 |
| 3,642 | <i>FZD1</i>      | -1.315242162 |
| 3,643 | <i>MGC23280</i>  | -1.315237057 |
| 3,644 | <i>IQGAP2</i>    | -1.315169768 |
| 3,645 | <i>PHOX2B</i>    | -1.315165    |
| 3,646 | <i>MEIS1</i>     | -1.314894527 |
| 3,647 | <i>AACS</i>      | -1.314879408 |
| 3,648 | <i>HE9</i>       | -1.314731614 |
| 3,649 | <i>CDK8</i>      | -1.314705911 |
| 3,650 | <i>ZCCHC7</i>    | -1.314613359 |
| 3,651 | <i>PLEC1</i>     | -1.314516704 |
| 3,652 | <i>CHC1</i>      | -1.314207518 |
| 3,653 | <i>LOC162427</i> | -1.314054855 |
| 3,654 | <i>ARHGAP4</i>   | -1.313691845 |
| 3,655 | <i>PHKG1</i>     | -1.313597922 |
| 3,656 | <i>CX40.1</i>    | -1.31353117  |
| 3,657 | <i>KIAA0404</i>  | -1.313331521 |

|       |                      |              |
|-------|----------------------|--------------|
| 3,658 | <i>CRTAC1</i>        | -1.313285192 |
| 3,659 | <i>CCND2</i>         | -1.313141325 |
| 3,660 | <i>CD74</i>          | -1.312944106 |
| 3,661 | <i>KRTAP1-5</i>      | -1.312585593 |
| 3,662 | <i>DDX5</i>          | -1.312070646 |
| 3,663 | <i>SIAT1</i>         | -1.31205094  |
| 3,664 | <i>RAMP3</i>         | -1.311354808 |
| 3,665 | <i>INHA</i>          | -1.311201426 |
| 3,666 | <i>DKFZP686O1689</i> | -1.311198818 |
| 3,667 | <i>WNT9B</i>         | -1.31109582  |
| 3,668 | <i>CBLB</i>          | -1.310858968 |
| 3,669 | <i>KPNA2</i>         | -1.310718239 |
| 3,670 | <i>FLJ12903</i>      | -1.310646069 |
| 3,671 | <i>OR4E2</i>         | -1.310393486 |
| 3,672 | <i>KRTHA5</i>        | -1.310381785 |
| 3,673 | <i>ZNF262</i>        | -1.310371756 |
| 3,674 | <i>AAT1</i>          | -1.310333117 |
| 3,675 | <i>C9ORF102</i>      | -1.310274559 |
| 3,676 | <i>EPOR</i>          | -1.31022362  |
| 3,677 | <i>MGC4293</i>       | -1.31018165  |
| 3,678 | <i>GNPDA1</i>        | -1.310121197 |
| 3,679 | <i>PARD6B</i>        | -1.310059654 |
| 3,680 | <i>FLJ41993</i>      | -1.309939764 |
| 3,681 | <i>DKFZP434C0631</i> | -1.309818792 |
| 3,682 | <i>METAP1</i>        | -1.309678655 |
| 3,683 | <i>FLJ11749</i>      | -1.30929338  |
| 3,684 | <i>FLJ30678</i>      | -1.30929338  |
| 3,685 | <i>ATP6V1E1</i>      | -1.308906509 |
| 3,686 | <i>FAM57B</i>        | -1.308805492 |
| 3,687 | <i>GRM3</i>          | -1.308789796 |
| 3,688 | <i>BANK1</i>         | -1.308706609 |
| 3,689 | <i>PEX14</i>         | -1.308548037 |
| 3,690 | <i>CDCA1</i>         | -1.308181471 |
| 3,691 | <i>LOC126374</i>     | -1.307930385 |
| 3,692 | <i>MGC4172</i>       | -1.307824213 |
| 3,693 | <i>PCDHGA3</i>       | -1.307483166 |
| 3,694 | <i>PAQR6</i>         | -1.307266844 |
| 3,695 | <i>SALL2</i>         | -1.307209746 |
| 3,696 | <i>FLJ13215</i>      | -1.307181232 |
| 3,697 | <i>KIAA0467</i>      | -1.307136974 |
| 3,698 | <i>MGC26717</i>      | -1.307130099 |
| 3,699 | <i>VDP</i>           | -1.307009904 |
| 3,700 | <i>ARV1</i>          | -1.306831211 |
| 3,701 | <i>NIT2</i>          | -1.306712252 |
| 3,702 | <i>FLJ20674</i>      | -1.306701766 |
| 3,703 | <i>RP3-402H5.2</i>   | -1.306608639 |
| 3,704 | <i>C18ORF43</i>      | -1.306589001 |

|       |                      |              |
|-------|----------------------|--------------|
| 3,705 | <i>ADIPOR2</i>       | -1.30635209  |
| 3,706 | <i>C7ORF25</i>       | -1.30635209  |
| 3,707 | <i>FLJ22729</i>      | -1.305959053 |
| 3,708 | <i>FARS2</i>         | -1.305862611 |
| 3,709 | <i>HDGF2</i>         | -1.305538863 |
| 3,710 | <i>LOC344191</i>     | -1.30532898  |
| 3,711 | <i>DKFZP667B1218</i> | -1.305261157 |
| 3,712 | <i>PDCD1</i>         | -1.305099553 |
| 3,713 | <i>ABC1</i>          | -1.304636924 |
| 3,714 | <i>MYO1B</i>         | -1.304597467 |
| 3,715 | <i>SDCCAG1</i>       | -1.304355875 |
| 3,716 | <i>TESK1</i>         | -1.304174966 |
| 3,717 | <i>KIAA0256</i>      | -1.30383992  |
| 3,718 | <i>B3GALT5</i>       | -1.303792131 |
| 3,719 | <i>STX10</i>         | -1.303785071 |
| 3,720 | <i>TNFRSF12A</i>     | -1.30358491  |
| 3,721 | <i>CP</i>            | -1.303331333 |
| 3,722 | <i>GTDC1</i>         | -1.303316298 |
| 3,723 | <i>ACAD9</i>         | -1.30322424  |
| 3,724 | <i>C10orf62</i>      | -1.30294686  |
| 3,725 | <i>MGC33835</i>      | -1.302908679 |
| 3,726 | <i>WDR37</i>         | -1.302881125 |
| 3,727 | <i>NPM3</i>          | -1.302635404 |
| 3,728 | <i>DKFZP762O076</i>  | -1.30260406  |
| 3,729 | <i>CSRP2BP</i>       | -1.302449801 |
| 3,730 | <i>LOC118430</i>     | -1.302428257 |
| 3,731 | <i>COX4I2</i>        | -1.302292837 |
| 3,732 | <i>C6ORF119</i>      | -1.301984335 |
| 3,733 | <i>GPATC1</i>        | -1.301842821 |
| 3,734 | <i>IGFBP7</i>        | -1.301826918 |
| 3,735 | <i>RNF123</i>        | -1.301267798 |
| 3,736 | <i>S100A14</i>       | -1.301191173 |
| 3,737 | <i>CGI-51</i>        | -1.301183371 |
| 3,738 | <i>C10ORF97</i>      | -1.301117182 |
| 3,739 | <i>UNG</i>           | -1.301057796 |
| 3,740 | <i>C14ORF171</i>     | -1.300799999 |
| 3,741 | <i>DAZAP1</i>        | -1.300752243 |
| 3,742 | <i>AIRE</i>          | -1.300748683 |
| 3,743 | <i>FLJ37659</i>      | -1.300550494 |
| 3,744 | <i>JMJD2C</i>        | -1.300547238 |
| 3,745 | <i>Polio #1</i>      | -1.300396825 |
| 3,746 | <i>NF-E4</i>         | -1.300385857 |
| 3,747 | <i>SOX11</i>         | -1.300373871 |
| 3,748 | <i>HYAL4</i>         | -1.300107505 |
| 3,749 | <i>LOXL2</i>         | -1.299986305 |
| 3,750 | <i>FLJ36874</i>      | -1.299778415 |
| 3,751 | <i>RAB27A</i>        | -1.299672962 |



|       |              |              |
|-------|--------------|--------------|
| 3,752 | XPR1         | -1.299589414 |
| 3,753 | RBM17        | -1.299554054 |
| 3,754 | NME1         | -1.299385579 |
| 3,755 | LSM1         | -1.299168427 |
| 3,756 | VTN          | -1.299101496 |
| 3,757 | DNPEP        | -1.298958901 |
| 3,758 | MGC10854     | -1.298934925 |
| 3,759 | OR9G4        | -1.298809947 |
| 3,760 | MGC14595     | -1.29878516  |
| 3,761 | FLJ13840     | -1.298579737 |
| 3,762 | CD7          | -1.298522123 |
| 3,763 | PRKCQ        | -1.29850906  |
| 3,764 | DDEF2        | -1.298420157 |
| 3,765 | C9orf157     | -1.29839663  |
| 3,766 | PROCA1       | -1.298268588 |
| 3,767 | LOC400509    | -1.298033343 |
| 3,768 | C10ORF86     | -1.298029506 |
| 3,769 | CSAD         | -1.297818722 |
| 3,770 | FBXL12       | -1.297463616 |
| 3,771 | ABHD7        | -1.297221864 |
| 3,772 | BBX          | -1.297193856 |
| 3,773 | PRPF4        | -1.297091179 |
| 3,774 | ZNF297       | -1.296713194 |
| 3,775 | ERAS         | -1.296561059 |
| 3,776 | FNTA         | -1.296437327 |
| 3,777 | DKFZP547I048 | -1.296379566 |
| 3,778 | SUPT16H      | -1.296376727 |
| 3,779 | FLJ22843     | -1.295927538 |
| 3,780 | UBE2V1       | -1.295920268 |
| 3,781 | C1ORF35      | -1.295618061 |
| 3,782 | UBE2E1       | -1.29549296  |
| 3,783 | XG           | -1.295307941 |
| 3,784 | PACRG        | -1.295307941 |
| 3,785 | COX7C        | -1.295216725 |
| 3,786 | STX17        | -1.295109902 |
| 3,787 | GPR45        | -1.295054184 |
| 3,788 | OR10V1       | -1.294989749 |
| 3,789 | TRIM63       | -1.294892941 |
| 3,790 | SLC17A4      | -1.294864597 |
| 3,791 | GYG2         | -1.294852178 |
| 3,792 | KIF3C        | -1.294467085 |
| 3,793 | MCM3AP       | -1.294377116 |
| 3,794 | LY96         | -1.294300697 |
| 3,795 | NR1D2        | -1.294196648 |
| 3,796 | RAC1         | -1.293989969 |
| 3,797 | LOC165186    | -1.293917391 |
| 3,798 | FLJ13236     | -1.29371721  |

|       |           |              |
|-------|-----------|--------------|
| 3,799 | DUPD1     | -1.293419804 |
| 3,800 | VLDLR     | -1.293357018 |
| 3,801 | KLK13     | -1.293351211 |
| 3,802 | SIMP      | -1.293214342 |
| 3,803 | LOC130502 | -1.293178775 |
| 3,804 | UNQ698    | -1.293005593 |
| 3,805 | WDR20     | -1.292725445 |
| 3,806 | LGI3      | -1.292637298 |
| 3,807 | QPRT      | -1.292551449 |
| 3,808 | LOC388381 | -1.292404283 |
| 3,809 | OR2G3     | -1.29207662  |
| 3,810 | PITPNM1   | -1.292070878 |
| 3,811 | EIF4EBP1  | -1.292069083 |
| 3,812 | GDAP1L1   | -1.291965932 |
| 3,813 | HNRPH3    | -1.291877567 |
| 3,814 | OXA1L     | -1.291703643 |
| 3,815 | RBM8A     | -1.291590759 |
| 3,816 | DUOX1     | -1.291379115 |
| 3,817 | CD81      | -1.291113714 |
| 3,818 | C9ORF90   | -1.291098568 |
| 3,819 | HRLP5     | -1.290820551 |
| 3,820 | OR5H6     | -1.290787532 |
| 3,821 | FLI35155  | -1.290688012 |
| 3,822 | LOC284307 | -1.290487951 |
| 3,823 | PVRL3     | -1.290445869 |
| 3,824 | SULT1E1   | -1.290318514 |
| 3,825 | LDB1      | -1.290171542 |
| 3,826 | SERINC4   | -1.289638575 |
| 3,827 | BOLA2B    | -1.289623273 |
| 3,828 | MGC26733  | -1.289521467 |
| 3,829 | SPP1      | -1.289490972 |
| 3,830 | TFEB      | -1.289478285 |
| 3,831 | OPRK1     | -1.289398221 |
| 3,832 | LECT2     | -1.28937304  |
| 3,833 | HPS6      | -1.28880964  |
| 3,834 | LOC284680 | -1.28876821  |
| 3,835 | THBS4     | -1.288732078 |
| 3,836 | GABRQ     | -1.288554906 |
| 3,837 | LOC223075 | -1.288433447 |
| 3,838 | KIAA1553  | -1.28842857  |
| 3,839 | FUT6      | -1.28834331  |
| 3,840 | SLCO3A1   | -1.288336208 |
| 3,841 | 8D6A      | -1.288314577 |
| 3,842 | RPS16     | -1.288279174 |
| 3,843 | MGC10854  | -1.288176807 |
| 3,844 | ITIH3     | -1.287718787 |
| 3,845 | EGFR      | -1.287519093 |

|       |                      |              |
|-------|----------------------|--------------|
| 3,846 | <i>HMBS</i>          | -1.287262133 |
| 3,847 | <i>C14ORF8</i>       | -1.287153673 |
| 3,848 | <i>GPR128</i>        | -1.286765564 |
| 3,849 | <i>COL6A1</i>        | -1.286764883 |
| 3,850 | <i>BTG2</i>          | -1.286526187 |
| 3,851 | <i>SMPD2</i>         | -1.286462748 |
| 3,852 | <i>HCA127</i>        | -1.286456233 |
| 3,853 | <i>RAB40B</i>        | -1.28635787  |
| 3,854 | <i>TOMM7</i>         | -1.286216845 |
| 3,855 | <i>SPTBN5</i>        | -1.286109642 |
| 3,856 | <i>EXOSC1</i>        | -1.285865156 |
| 3,857 | <i>DKFZP761L1518</i> | -1.285820858 |
| 3,858 | <i>CPSF4</i>         | -1.285787264 |
| 3,859 | <i>FLJ40142</i>      | -1.285781641 |
| 3,860 | <i>DYRK1B</i>        | -1.285580403 |
| 3,861 | <i>MRPL34</i>        | -1.285349988 |
| 3,862 | <i>FLJ25333</i>      | -1.285328142 |
| 3,863 | <i>LOC148206</i>     | -1.28527396  |
| 3,864 | <i>LOC132203</i>     | -1.285240397 |
| 3,865 | <i>STX1A</i>         | -1.285040034 |
| 3,866 | <i>RIPK1</i>         | -1.284977699 |
| 3,867 | <i>RLN2</i>          | -1.284947172 |
| 3,868 | <i>HDAC8</i>         | -1.284742594 |
| 3,869 | <i>ATP5O</i>         | -1.284582277 |
| 3,870 | <i>STK39</i>         | -1.28383798  |
| 3,871 | <i>SGKL</i>          | -1.283827364 |
| 3,872 | <i>UGCGL2</i>        | -1.283750533 |
| 3,873 | <i>CRAMP1L</i>       | -1.283522409 |
| 3,874 | <i>RBP3</i>          | -1.283518195 |
| 3,875 | <i>POLE2</i>         | -1.283420045 |
| 3,876 | <i>SH3GL2</i>        | -1.28310705  |
| 3,877 | <i>LOC646603</i>     | -1.28287938  |
| 3,878 | <i>RBM25</i>         | -1.282723948 |
| 3,879 | <i>DIAPH3</i>        | -1.282618822 |
| 3,880 | <i>C6ORF27</i>       | -1.282382273 |
| 3,881 | <i>SPAS1</i>         | -1.282367492 |
| 3,882 | <i>PNMA6A</i>        | -1.282341854 |
| 3,883 | <i>HSFY2</i>         | -1.282080417 |
| 3,884 | <i>C14ORF104</i>     | -1.282025327 |
| 3,885 | <i>WDR71</i>         | -1.281793363 |
| 3,886 | <i>KRTHA6</i>        | -1.281752892 |
| 3,887 | <i>MGC39725</i>      | -1.281541465 |
| 3,888 | <i>LOC285498</i>     | -1.28145966  |
| 3,889 | <i>SFMBT2</i>        | -1.281409767 |
| 3,890 | <i>ZNF524</i>        | -1.281361464 |
| 3,891 | <i>PIGK</i>          | -1.281278634 |
| 3,892 | <i>TFPT</i>          | -1.281217106 |

|       |           |              |
|-------|-----------|--------------|
| 3,893 | PB1       | -1.281200554 |
| 3,894 | PAK2      | -1.281129365 |
| 3,895 | KRT23     | -1.28105087  |
| 3,896 | WINS1     | -1.280915559 |
| 3,897 | C20ORF116 | -1.280861841 |
| 3,898 | MMP2      | -1.28085781  |
| 3,899 | C20ORF42  | -1.280852966 |
| 3,900 | FLJ14888  | -1.280794208 |
| 3,901 | TSN       | -1.280752969 |
| 3,902 | MKI67IP   | -1.280698055 |
| 3,903 | KIAA0759  | -1.28066327  |
| 3,904 | NOTCH3    | -1.280398617 |
| 3,905 | IHPK3     | -1.280385885 |
| 3,906 | LEPRE1    | -1.280282381 |
| 3,907 | PPP6C     | -1.280237518 |
| 3,908 | AICDA     | -1.280216994 |
| 3,909 | TLX2      | -1.280212673 |
| 3,910 | NLGN2     | -1.280139593 |
| 3,911 | SLC41A1   | -1.280138859 |
| 3,912 | HIVEP1    | -1.279932257 |
| 3,913 | ZNF354C   | -1.279748631 |
| 3,914 | MAGEA6    | -1.279704939 |
| 3,915 | PPIF      | -1.27964804  |
| 3,916 | PPP1R10   | -1.279574025 |
| 3,917 | SLC30A2   | -1.279447961 |
| 3,918 | HYAL2     | -1.279349895 |
| 3,919 | LETM2     | -1.279241572 |
| 3,920 | BAT4      | -1.279234637 |
| 3,921 | MARK3     | -1.279095648 |
| 3,922 | UNQ9433   | -1.279076715 |
| 3,923 | POT1      | -1.278877538 |
| 3,924 | ZNF630    | -1.278858462 |
| 3,925 | E2F7      | -1.278841599 |
| 3,926 | DGKK      | -1.278804628 |
| 3,927 | KIAA1026  | -1.278794261 |
| 3,928 | FLJ22301  | -1.278500213 |
| 3,929 | LOC254359 | -1.278433443 |
| 3,930 | NIN       | -1.278089329 |
| 3,931 | NFATC3    | -1.277895842 |
| 3,932 | GABRG3    | -1.277861883 |
| 3,933 | AKAP13    | -1.277381516 |
| 3,934 | BZW1      | -1.277274756 |
| 3,935 | BRP44L    | -1.277268718 |
| 3,936 | HIST1H3B  | -1.277257271 |
| 3,937 | FLJ23861  | -1.27679489  |
| 3,938 | TTC1      | -1.276777828 |
| 3,939 | TRIM      | -1.276698187 |

|       |                      |              |
|-------|----------------------|--------------|
| 3,940 | <i>CSNK1A1</i>       | -1.276668488 |
| 3,941 | <i>BARHL2</i>        | -1.276665283 |
| 3,942 | <i>MKL1</i>          | -1.276657719 |
| 3,943 | <i>CKLFSF5</i>       | -1.276541718 |
| 3,944 | <i>FLJ31340</i>      | -1.276417516 |
| 3,945 | <i>ITIH1</i>         | -1.276010677 |
| 3,946 | <i>MGC62100</i>      | -1.275996084 |
| 3,947 | <i>HUMPPA</i>        | -1.275818545 |
| 3,948 | <i>OR4D9</i>         | -1.27575371  |
| 3,949 | <i>STK23</i>         | -1.275649882 |
| 3,950 | <i>UNQ467</i>        | -1.275640744 |
| 3,951 | <i>TP53I5</i>        | -1.275587912 |
| 3,952 | <i>CEACAM7</i>       | -1.275287069 |
| 3,953 | <i>SFRS10</i>        | -1.275235198 |
| 3,954 | <i>PEX3</i>          | -1.275127706 |
| 3,955 | <i>UBE2E2</i>        | -1.274982145 |
| 3,956 | <i>MGC41945</i>      | -1.274828396 |
| 3,957 | <i>ABL2</i>          | -1.274731755 |
| 3,958 | <i>FAM12A</i>        | -1.27438635  |
| 3,959 | <i>USP40</i>         | -1.274381248 |
| 3,960 | <i>DELGEF</i>        | -1.274178299 |
| 3,961 | <i>LGALS3</i>        | -1.274055809 |
| 3,962 | <i>OR2T33</i>        | -1.273953002 |
| 3,963 | <i>ARHGEF5</i>       | -1.273928769 |
| 3,964 | <i>PLCD1</i>         | -1.273841325 |
| 3,965 | <i>OKL38</i>         | -1.273820227 |
| 3,966 | <i>GPR50</i>         | -1.273622519 |
| 3,967 | <i>HOXB2</i>         | -1.272831857 |
| 3,968 | <i>LOC440087</i>     | -1.272802481 |
| 3,969 | <i>ZNF208</i>        | -1.272763347 |
| 3,970 | <i>MGC5987</i>       | -1.272636342 |
| 3,971 | <i>GADD45B</i>       | -1.272556408 |
| 3,972 | <i>IPO9</i>          | -1.272389944 |
| 3,973 | <i>PGD</i>           | -1.272251753 |
| 3,974 | <i>RHOF</i>          | -1.272229291 |
| 3,975 | <i>DKFZP76100113</i> | -1.272025186 |
| 3,976 | <i>PHC2</i>          | -1.271968368 |
| 3,977 | <i>TRAF2</i>         | -1.271767558 |
| 3,978 | <i>AGL</i>           | -1.271761923 |
| 3,979 | <i>VPREB1</i>        | -1.271567515 |
| 3,980 | <i>MO25</i>          | -1.271219398 |
| 3,981 | <i>LRG1</i>          | -1.271173904 |
| 3,982 | <i>TUBG2</i>         | -1.271102938 |
| 3,983 | <i>CPA5</i>          | -1.270967585 |
| 3,984 | <i>FLJ10178</i>      | -1.270957614 |
| 3,985 | <i>FLJ38991</i>      | -1.270884998 |
| 3,986 | <i>FANCF</i>         | -1.27087475  |

|       |           |              |
|-------|-----------|--------------|
| 3,987 | AXIN2     | -1.270746023 |
| 3,988 | CD36      | -1.270659563 |
| 3,989 | UNQ338    | -1.270369715 |
| 3,990 | IRF2BP2   | -1.270353804 |
| 3,991 | HELZ      | -1.269754068 |
| 3,992 | LISCH7    | -1.269716119 |
| 3,993 | MRPL24    | -1.269667622 |
| 3,994 | RBKS      | -1.269364799 |
| 3,995 | HOXA11    | -1.26935614  |
| 3,996 | ACPT      | -1.269345955 |
| 3,997 | KTN1      | -1.269060533 |
| 3,998 | C9ORF100S | -1.268915368 |
| 3,999 | FLJ21511  | -1.26881692  |
| 4,000 | SYT12     | -1.268391624 |
| 4,001 | FLJ32796  | -1.268303525 |
| 4,002 | IQCB1     | -1.268181571 |
| 4,003 | LOC652759 | -1.268123568 |
| 4,004 | UNQ3045   | -1.268084497 |
| 4,005 | C11ORF4   | -1.268066269 |
| 4,006 | COL5A1    | -1.268055402 |
| 4,007 | TIM14     | -1.268022444 |
| 4,008 | CDKN1B    | -1.267959971 |
| 4,009 | APOA4     | -1.267879655 |
| 4,010 | CPLX1     | -1.267877724 |
| 4,011 | DAPK2     | -1.267792799 |
| 4,012 | SELL      | -1.267477091 |
| 4,013 | ZNF509    | -1.267337796 |
| 4,014 | ETFB      | -1.267267506 |
| 4,015 | FLJ20321  | -1.267220238 |
| 4,016 | SS18L1    | -1.267178983 |
| 4,017 | LOC343263 | -1.26685491  |
| 4,018 | PCDHGB7   | -1.26676817  |
| 4,019 | BCAP29    | -1.266740423 |
| 4,020 | C1QTNF3   | -1.2666037   |
| 4,021 | C9ORF9    | -1.2666037   |
| 4,022 | CPXCR1    | -1.266482161 |
| 4,023 | ARHGDI1A  | -1.266188706 |
| 4,024 | LOC338328 | -1.266123274 |
| 4,025 | GMNN      | -1.26607402  |
| 4,026 | P4HA3     | -1.265595128 |
| 4,027 | LOC650137 | -1.26540985  |
| 4,028 | TDRD9     | -1.26540985  |
| 4,029 | VPS4B     | -1.265301657 |
| 4,030 | STK11IP   | -1.265179171 |
| 4,031 | FLJ10116  | -1.26512317  |
| 4,032 | PTK7      | -1.265118047 |
| 4,033 | ASB1      | -1.264976663 |

|       |           |              |
|-------|-----------|--------------|
| 4,034 | ACAD8     | -1.264971269 |
| 4,035 | HK1       | -1.264887699 |
| 4,036 | FLJ22167  | -1.264818533 |
| 4,037 | PLXDC2    | -1.26456631  |
| 4,038 | FAM64A    | -1.264418098 |
| 4,039 | ACADM     | -1.264393427 |
| 4,040 | FLJ35779  | -1.264373156 |
| 4,041 | DERL2     | -1.264347448 |
| 4,042 | FLJ32675  | -1.264165078 |
| 4,043 | DEFB110   | -1.263984579 |
| 4,044 | CACNG2    | -1.2638787   |
| 4,045 | ZNF76     | -1.263715471 |
| 4,046 | FLJ36561  | -1.263343928 |
| 4,047 | TUBAL3    | -1.26333068  |
| 4,048 | NXT2      | -1.263108052 |
| 4,049 | FLJ25416  | -1.262643737 |
| 4,050 | AKT1S1    | -1.262635406 |
| 4,051 | BANF1     | -1.262515286 |
| 4,052 | KRTAP19-3 | -1.262433799 |
| 4,053 | NUBP2     | -1.262427708 |
| 4,054 | PCDHA1    | -1.262046718 |
| 4,055 | PIK3R1    | -1.261774608 |
| 4,056 | PGBD1     | -1.261753373 |
| 4,057 | PGBD1     | -1.261753373 |
| 4,058 | DHDH      | -1.261687161 |
| 4,059 | C1QTNF8   | -1.261416492 |
| 4,060 | WFDC10B   | -1.261363167 |
| 4,061 | LOC57821  | -1.261334424 |
| 4,062 | COL15A1   | -1.261236026 |
| 4,063 | ROXAN     | -1.261124268 |
| 4,064 | NR5A1     | -1.26102215  |
| 4,065 | CDC42EP5  | -1.260931508 |
| 4,066 | LRRC21    | -1.260912224 |
| 4,067 | GZMH      | -1.260724576 |
| 4,068 | MASP2     | -1.260461519 |
| 4,069 | MYL4      | -1.260398507 |
| 4,070 | ITM2B     | -1.260375396 |
| 4,071 | ARS2      | -1.259975805 |
| 4,072 | OR2T1     | -1.259929081 |
| 4,073 | PRLR      | -1.259903946 |
| 4,074 | TRIB3     | -1.259601372 |
| 4,075 | GABBR1    | -1.259449799 |
| 4,076 | MPL       | -1.259057364 |
| 4,077 | FLJ32549  | -1.259035436 |
| 4,078 | KCNH7     | -1.259012322 |
| 4,079 | LCN1      | -1.258892919 |
| 4,080 | CRAT      | -1.258213586 |

|       |                  |              |
|-------|------------------|--------------|
| 4,081 | <i>KLK9</i>      | -1.257972828 |
| 4,082 | <i>FLJ10052</i>  | -1.257903441 |
| 4,083 | <i>NID</i>       | -1.257713324 |
| 4,084 | <i>FKSG87</i>    | -1.257591368 |
| 4,085 | <i>FLJ10945</i>  | -1.257501182 |
| 4,086 | <i>HUS1</i>      | -1.257494143 |
| 4,087 | <i>FLJ12770</i>  | -1.257144489 |
| 4,088 | <i>TRIM55</i>    | -1.256834346 |
| 4,089 | <i>ZNRF1</i>     | -1.256813576 |
| 4,090 | <i>OR6C76</i>    | -1.256805545 |
| 4,091 | <i>FCN3</i>      | -1.256718479 |
| 4,092 | <i>PLA2G2A</i>   | -1.256648949 |
| 4,093 | <i>FLJ46831</i>  | -1.256518317 |
| 4,094 | <i>GNG4</i>      | -1.256474162 |
| 4,095 | <i>WDR17</i>     | -1.256371095 |
| 4,096 | <i>LRCH1</i>     | -1.25622233  |
| 4,097 | <i>LMAN1L</i>    | -1.255816571 |
| 4,098 | <i>RDH10</i>     | -1.255499201 |
| 4,099 | <i>ARC</i>       | -1.255357404 |
| 4,100 | <i>TIGD4</i>     | -1.255343111 |
| 4,101 | <i>TIGD4</i>     | -1.255343111 |
| 4,102 | <i>FLJ40201</i>  | -1.255220014 |
| 4,103 | <i>TEX27</i>     | -1.255050883 |
| 4,104 | <i>DPYSL5</i>    | -1.254894195 |
| 4,105 | <i>ZNF207</i>    | -1.254576097 |
| 4,106 | <i>IRAK1</i>     | -1.254501244 |
| 4,107 | <i>EIF4ENIF1</i> | -1.254415107 |
| 4,108 | <i>PCK2</i>      | -1.254364106 |
| 4,109 | <i>KLK14</i>     | -1.254253952 |
| 4,110 | <i>CCT2</i>      | -1.254074435 |
| 4,111 | <i>LOC57019</i>  | -1.254048043 |
| 4,112 | <i>FLJ20202</i>  | -1.253616305 |
| 4,113 | <i>RNPC1</i>     | -1.253491185 |
| 4,114 | <i>CAPN3</i>     | -1.253367157 |
| 4,115 | <i>GPR111</i>    | -1.253227228 |
| 4,116 | <i>POSTN</i>     | -1.253132885 |
| 4,117 | <i>EIF5A2</i>    | -1.253060288 |
| 4,118 | <i>C6ORF55</i>   | -1.252894095 |
| 4,119 | <i>PHF8</i>      | -1.252851137 |
| 4,120 | <i>LOC440836</i> | -1.252832955 |
| 4,121 | <i>AGTR2</i>     | -1.252439581 |
| 4,122 | <i>ATP5G3</i>    | -1.252274835 |
| 4,123 | <i>TOMM22</i>    | -1.25224063  |
| 4,124 | <i>C12ORF4</i>   | -1.252237717 |
| 4,125 | <i>PRDX5</i>     | -1.251805976 |
| 4,126 | <i>RFPL4B</i>    | -1.251543909 |
| 4,127 | <i>EHMT1</i>     | -1.251531241 |



|       |           |              |
|-------|-----------|--------------|
| 4,128 | NYD-SP28  | -1.25151985  |
| 4,129 | LAMP1     | -1.251473793 |
| 4,130 | MGC45474  | -1.251382267 |
| 4,131 | NDUFV2    | -1.251236426 |
| 4,132 | KEL       | -1.251127552 |
| 4,133 | GEMIN4    | -1.250939321 |
| 4,134 | KRT12     | -1.25077778  |
| 4,135 | FLJ40504  | -1.250527099 |
| 4,136 | MGC4562   | -1.250465393 |
| 4,137 | ACE2      | -1.250110115 |
| 4,138 | SLC9A6    | -1.249678448 |
| 4,139 | NAGLU     | -1.249659322 |
| 4,140 | LOC390667 | -1.249603252 |
| 4,141 | TAF6L     | -1.249300679 |
| 4,142 | C6ORF197  | -1.249200855 |
| 4,143 | OR6B2     | -1.249016009 |
| 4,144 | KIAA0563  | -1.24899943  |
| 4,145 | MB        | -1.248892841 |
| 4,146 | EXTL3     | -1.248642873 |
| 4,147 | GPR109B   | -1.248633449 |
| 4,148 | BRD8      | -1.248317251 |
| 4,149 | MRPL44    | -1.248268578 |
| 4,150 | PRKAR1B   | -1.248066505 |
| 4,151 | FTH1      | -1.248006103 |
| 4,152 | RAB21     | -1.247954078 |
| 4,153 | CD2AP     | -1.247579815 |
| 4,154 | XPO7      | -1.247473715 |
| 4,155 | MBTD1     | -1.247348908 |
| 4,156 | MLL1      | -1.247253211 |
| 4,157 | MGC23918  | -1.247167741 |
| 4,158 | VDRIP     | -1.247128101 |
| 4,159 | ZNF223    | -1.246995159 |
| 4,160 | RAB2      | -1.246816705 |
| 4,161 | SOX18     | -1.24681455  |
| 4,162 | RPL8      | -1.246455967 |
| 4,163 | AKAP5     | -1.246372255 |
| 4,164 | FLJ23514  | -1.246032773 |
| 4,165 | MYOM2     | -1.245959062 |
| 4,166 | SMS       | -1.245941924 |
| 4,167 | MGC33926  | -1.245410144 |
| 4,168 | GPC5      | -1.245366537 |
| 4,169 | CXCL13    | -1.245050034 |
| 4,170 | AGXT2     | -1.244883514 |
| 4,171 | ZNF43     | -1.244851673 |
| 4,172 | MAP3K9    | -1.244635123 |
| 4,173 | NRF1      | -1.244569201 |
| 4,174 | TCF20     | -1.244546413 |

|       |                  |              |
|-------|------------------|--------------|
| 4,175 | <i>LOC493869</i> | -1.244350617 |
| 4,176 | <i>PHF10</i>     | -1.244322854 |
| 4,177 | <i>HTR1D</i>     | -1.24431184  |
| 4,178 | <i>AHCYL1</i>    | -1.244178233 |
| 4,179 | <i>HHIP</i>      | -1.244019415 |
| 4,180 | <i>MSL3L1</i>    | -1.243936461 |
| 4,181 | <i>RAB39</i>     | -1.243860664 |
| 4,182 | <i>MDH1B</i>     | -1.243808972 |
| 4,183 | <i>RFC4</i>      | -1.243764302 |
| 4,184 | <i>RAB24</i>     | -1.243726848 |
| 4,185 | <i>FLJ39458</i>  | -1.243726537 |
| 4,186 | <i>ARHGAP9</i>   | -1.243712159 |
| 4,187 | <i>FLJ25692</i>  | -1.243233399 |
| 4,188 | <i>LY6H</i>      | -1.243048932 |
| 4,189 | <i>OR5M11</i>    | -1.243009968 |
| 4,190 | <i>SNAPC4</i>    | -1.242966597 |
| 4,191 | <i>MIRAB13</i>   | -1.242891936 |
| 4,192 | <i>LMNB1</i>     | -1.242878612 |
| 4,193 | <i>FLJ39630</i>  | -1.242790036 |
| 4,194 | <i>LOC257177</i> | -1.242733448 |
| 4,195 | <i>RGL3</i>      | -1.242611867 |
| 4,196 | <i>NRL</i>       | -1.242472639 |
| 4,197 | <i>FBXL10</i>    | -1.242451026 |
| 4,198 | <i>LOC138255</i> | -1.242438214 |
| 4,199 | <i>ZFYVE20</i>   | -1.242416349 |
| 4,200 | <i>STIM2</i>     | -1.242134221 |
| 4,201 | <i>KIF22</i>     | -1.241666763 |
| 4,202 | <i>ANAPC1</i>    | -1.241467189 |
| 4,203 | <i>IGFBP5</i>    | -1.241330818 |
| 4,204 | <i>PPAP2A</i>    | -1.241329752 |
| 4,205 | <i>LSM5</i>      | -1.241220739 |
| 4,206 | <i>RGPR</i>      | -1.241192241 |
| 4,207 | <i>UNC5C</i>     | -1.241152392 |
| 4,208 | <i>FLJ22104</i>  | -1.241056341 |
| 4,209 | <i>SPUF</i>      | -1.241046861 |
| 4,210 | <i>MAT2B</i>     | -1.240963162 |
| 4,211 | <i>MGC32124</i>  | -1.240950909 |
| 4,212 | <i>STK38L</i>    | -1.240658797 |
| 4,213 | <i>FLJ12436</i>  | -1.240616535 |
| 4,214 | <i>GPC6</i>      | -1.240559024 |
| 4,215 | <i>NCK1</i>      | -1.240368741 |
| 4,216 | <i>B3GNT5</i>    | -1.240366539 |
| 4,217 | <i>PHF19</i>     | -1.240274395 |
| 4,218 | <i>MGC35555</i>  | -1.240224255 |
| 4,219 | <i>PON1</i>      | -1.240223849 |
| 4,220 | <i>GALK2</i>     | -1.240138197 |
| 4,221 | <i>CORO7</i>     | -1.240065228 |

|       |           |              |
|-------|-----------|--------------|
| 4,222 | MGC45871  | -1.239994356 |
| 4,223 | OR5D13    | -1.239979828 |
| 4,224 | LOC127391 | -1.239808212 |
| 4,225 | KIR3DL3   | -1.239590269 |
| 4,226 | SLC26A9   | -1.239507023 |
| 4,227 | SPANX-N2  | -1.239446538 |
| 4,228 | NR2E1     | -1.239422815 |
| 4,229 | OR2T34    | -1.239315536 |
| 4,230 | LOC144100 | -1.238918456 |
| 4,231 | HTN3      | -1.238849645 |
| 4,232 | FOXA2     | -1.238825302 |
| 4,233 | PRO0149   | -1.238809102 |
| 4,234 | BTBD4     | -1.238771707 |
| 4,235 | C19ORF14  | -1.238666939 |
| 4,236 | LOC126017 | -1.238396578 |
| 4,237 | SLC2A3    | -1.238009871 |
| 4,238 | MAGI-3    | -1.238007559 |
| 4,239 | KCNJ2     | -1.237869372 |
| 4,240 | RPL15     | -1.237649217 |
| 4,241 | TEX11     | -1.237480542 |
| 4,242 | PRES      | -1.236991868 |
| 4,243 | FLJ22329  | -1.23693769  |
| 4,244 | CYP51A1   | -1.236854269 |
| 4,245 | SETDB2    | -1.236839298 |
| 4,246 | MGC21644  | -1.236635746 |
| 4,247 | BEX2      | -1.236493815 |
| 4,248 | ABCB8     | -1.23620217  |
| 4,249 | CDX1      | -1.23613122  |
| 4,250 | LRRN6A    | -1.236119987 |
| 4,251 | C9ORF66   | -1.236100282 |
| 4,252 | DRE1      | -1.236043846 |
| 4,253 | TSPYL4    | -1.235514303 |
| 4,254 | RANGAP1   | -1.235086154 |
| 4,255 | ETV1      | -1.234993171 |
| 4,256 | FLJ10099  | -1.23495503  |
| 4,257 | BA526D8.4 | -1.234598571 |
| 4,258 | MRPS27    | -1.234364135 |
| 4,259 | C1ORF26   | -1.234179706 |
| 4,260 | TBC1D20   | -1.234173306 |
| 4,261 | OR11A1    | -1.234002106 |
| 4,262 | DRG2      | -1.233922583 |
| 4,263 | OSTALPHA  | -1.233852282 |
| 4,264 | PLSCR2    | -1.233822063 |
| 4,265 | BNIP3     | -1.233574672 |
| 4,266 | MTIF3     | -1.233482381 |
| 4,267 | GALT      | -1.233424216 |
| 4,268 | SH3GL3    | -1.23265036  |

|       |              |              |
|-------|--------------|--------------|
| 4,269 | KIAA0368     | -1.232483839 |
| 4,270 | GOLPH4       | -1.232452424 |
| 4,271 | BIRC1        | -1.232417582 |
| 4,272 | ARL6IP2      | -1.232229206 |
| 4,273 | POLD1        | -1.232157562 |
| 4,274 | KLHL22       | -1.232156961 |
| 4,275 | LIF          | -1.232125866 |
| 4,276 | CRHR1        | -1.23195187  |
| 4,277 | APBB1IP      | -1.231841146 |
| 4,278 | SPTLC1       | -1.231797352 |
| 4,279 | MANBAL       | -1.231756716 |
| 4,280 | GCLM         | -1.231433714 |
| 4,281 | FLJ25421     | -1.231430274 |
| 4,282 | PLA2G12B     | -1.231199825 |
| 4,283 | KIAA0329     | -1.230674184 |
| 4,284 | FLJ39743     | -1.230543069 |
| 4,285 | MYC          | -1.230361528 |
| 4,286 | MGC50372     | -1.230073386 |
| 4,287 | BCL6B        | -1.229919508 |
| 4,288 | H2AFZ        | -1.229916683 |
| 4,289 | LOC100127889 | -1.229877142 |
| 4,290 | GLP2R        | -1.229808051 |
| 4,291 | ZSWIM4       | -1.229727102 |
| 4,292 | ENC1         | -1.229555027 |
| 4,293 | TRAF1        | -1.229514717 |
| 4,294 | KIAA1009     | -1.229383587 |
| 4,295 | OTOA         | -1.2290716   |
| 4,296 | MRPL41       | -1.229029391 |
| 4,297 | SE57-1       | -1.228780108 |
| 4,298 | CTSB         | -1.228772358 |
| 4,299 | CD3G         | -1.228727145 |
| 4,300 | RPL6         | -1.22812504  |
| 4,301 | CORIN        | -1.227650094 |
| 4,302 | DPM3         | -1.227594533 |
| 4,303 | DO           | -1.227526075 |
| 4,304 | UNQ3033      | -1.227491753 |
| 4,305 | TENC1        | -1.227415958 |
| 4,306 | KPNA6        | -1.227369254 |
| 4,307 | LOC150159    | -1.227332001 |
| 4,308 | BHLHB4       | -1.227168505 |
| 4,309 | MAP3K11      | -1.227002835 |
| 4,310 | SLC2A13      | -1.226744143 |
| 4,311 | NOTCH2NL     | -1.226586371 |
| 4,312 | BMPER        | -1.226523683 |
| 4,313 | FANK1        | -1.226455094 |
| 4,314 | C6ORF211     | -1.226236857 |
| 4,315 | LIN9         | -1.226207153 |

|       |                      |              |
|-------|----------------------|--------------|
| 4,316 | <i>CCR4</i>          | -1.226127898 |
| 4,317 | <i>PSMB10</i>        | -1.225676288 |
| 4,318 | <i>TCN2</i>          | -1.225574821 |
| 4,319 | <i>DOCK1</i>         | -1.22515719  |
| 4,320 | <i>TXNRD3</i>        | -1.225123411 |
| 4,321 | <i>USP38</i>         | -1.224967433 |
| 4,322 | <i>LOC150223</i>     | -1.224524195 |
| 4,323 | <i>URP2</i>          | -1.224244076 |
| 4,324 | <i>SGNE1</i>         | -1.224110764 |
| 4,325 | <i>MERTK</i>         | -1.22399374  |
| 4,326 | <i>LOC57146</i>      | -1.223731907 |
| 4,327 | <i>SLC25A25</i>      | -1.223461462 |
| 4,328 | <i>MGC2463</i>       | -1.223332255 |
| 4,329 | <i>C6orf26</i>       | -1.223142298 |
| 4,330 | <i>NRIP1</i>         | -1.223126436 |
| 4,331 | <i>CD1E</i>          | -1.222559618 |
| 4,332 | <i>MGC40214</i>      | -1.222545238 |
| 4,333 | <i>CBLC</i>          | -1.222203178 |
| 4,334 | <i>PLVAP</i>         | -1.222034202 |
| 4,335 | <i>TMEM57</i>        | -1.221933957 |
| 4,336 | <i>PRAMEF6</i>       | -1.221648313 |
| 4,337 | <i>DNASE1L3</i>      | -1.221519426 |
| 4,338 | <i>DNCH2</i>         | -1.221428928 |
| 4,339 | <i>FXD3</i>          | -1.221364034 |
| 4,340 | <i>CYP2C9</i>        | -1.221107275 |
| 4,341 | <i>DEFB103A</i>      | -1.221061486 |
| 4,342 | <i>PCTK3</i>         | -1.220956431 |
| 4,343 | <i>ARL10B</i>        | -1.220826817 |
| 4,344 | <i>LSAMP</i>         | -1.220702745 |
| 4,345 | <i>C20ORF3</i>       | -1.220669969 |
| 4,346 | <i>C6ORF68</i>       | -1.220641953 |
| 4,347 | <i>PHLDB1</i>        | -1.220620948 |
| 4,348 | <i>ZNF382</i>        | -1.220512472 |
| 4,349 | <i>TMPO</i>          | -1.220501506 |
| 4,350 | <i>SCDR9</i>         | -1.220460431 |
| 4,351 | <i>P5326</i>         | -1.220446309 |
| 4,352 | <i>DMTF1</i>         | -1.220386524 |
| 4,353 | <i>MGC45731</i>      | -1.220168157 |
| 4,354 | <i>PITPNM2</i>       | -1.220074284 |
| 4,355 | <i>LOC352909</i>     | -1.220035154 |
| 4,356 | <i>MRGPRG</i>        | -1.219833388 |
| 4,357 | <i>DKFZP313G1735</i> | -1.219761302 |
| 4,358 | <i>GALNT7</i>        | -1.219694097 |
| 4,359 | <i>ZNF237</i>        | -1.21962757  |
| 4,360 | <i>PRAM-1</i>        | -1.219239414 |
| 4,361 | <i>CASP3</i>         | -1.218881111 |
| 4,362 | <i>LOC116068</i>     | -1.218780881 |

|       |                  |              |
|-------|------------------|--------------|
| 4,363 | <i>SST</i>       | -1.218574865 |
| 4,364 | <i>ZNF337</i>    | -1.218567223 |
| 4,365 | <i>LRRC27</i>    | -1.218228546 |
| 4,366 | <i>RANBP6</i>    | -1.218224432 |
| 4,367 | <i>GOLPH2</i>    | -1.218192064 |
| 4,368 | <i>CAPON</i>     | -1.218155455 |
| 4,369 | <i>FLJ25076</i>  | -1.218150096 |
| 4,370 | <i>ASCL1</i>     | -1.218105304 |
| 4,371 | <i>NYD-SP29</i>  | -1.21806413  |
| 4,372 | <i>WIT-1</i>     | -1.218012059 |
| 4,373 | <i>RTN4</i>      | -1.217392751 |
| 4,374 | <i>ALDH4A1</i>   | -1.217143281 |
| 4,375 | <i>MGC29814</i>  | -1.21658349  |
| 4,376 | <i>HLA-F</i>     | -1.216566113 |
| 4,377 | <i>PKP4</i>      | -1.216512107 |
| 4,378 | <i>OR4N5</i>     | -1.216364524 |
| 4,379 | <i>SLC24A2</i>   | -1.216233347 |
| 4,380 | <i>NR4A3</i>     | -1.216110675 |
| 4,381 | <i>DNMT2</i>     | -1.215907651 |
| 4,382 | <i>ZNF197</i>    | -1.215870747 |
| 4,383 | <i>RAB33A</i>    | -1.215861673 |
| 4,384 | <i>NKX3-1</i>    | -1.215602336 |
| 4,385 | <i>EYA2</i>      | -1.215553682 |
| 4,386 | <i>SLITRK2</i>   | -1.21550388  |
| 4,387 | <i>SPEC1</i>     | -1.215344753 |
| 4,388 | <i>PLEK</i>      | -1.215248962 |
| 4,389 | <i>FLJ12847</i>  | -1.215209846 |
| 4,390 | <i>KCNH8</i>     | -1.214996232 |
| 4,391 | <i>RG9MTD1</i>   | -1.214774674 |
| 4,392 | <i>TRPM5</i>     | -1.214562792 |
| 4,393 | <i>PISD</i>      | -1.213699402 |
| 4,394 | <i>ALDH1A2</i>   | -1.213608878 |
| 4,395 | <i>TMPRSS11A</i> | -1.213370335 |
| 4,396 | <i>FLJ21439</i>  | -1.213349831 |
| 4,397 | <i>GPR63</i>     | -1.213310604 |
| 4,398 | <i>BCAT2</i>     | -1.213179755 |
| 4,399 | <i>OR2T3</i>     | -1.21316707  |
| 4,400 | <i>CA3</i>       | -1.213161265 |
| 4,401 | <i>CABP4</i>     | -1.213081448 |
| 4,402 | <i>SPOCK</i>     | -1.212813555 |
| 4,403 | <i>HMG20A</i>    | -1.212538203 |
| 4,404 | <i>DHRS6</i>     | -1.212538203 |
| 4,405 | <i>KIAA1530</i>  | -1.212423858 |
| 4,406 | <i>PIK3C2B</i>   | -1.21235752  |
| 4,407 | <i>ITM2B</i>     | -1.212313446 |
| 4,408 | <i>AZ2</i>       | -1.212292443 |
| 4,409 | <i>H41</i>       | -1.212264234 |

|       |                     |              |
|-------|---------------------|--------------|
| 4,410 | <i>FLJ36878</i>     | -1.212147224 |
| 4,411 | <i>C7ORF30</i>      | -1.212125814 |
| 4,412 | <i>FLJ23598</i>     | -1.211809419 |
| 4,413 | <i>CCNG2</i>        | -1.211809419 |
| 4,414 | <i>D21S2056E</i>    | -1.211755589 |
| 4,415 | <i>ZAP70</i>        | -1.211623013 |
| 4,416 | <i>CPSF2</i>        | -1.21156365  |
| 4,417 | <i>RPL36AL</i>      | -1.211371407 |
| 4,418 | <i>GSTA2</i>        | -1.211036868 |
| 4,419 | <i>LOC115098</i>    | -1.210959983 |
| 4,420 | <i>TYRO3</i>        | -1.210900844 |
| 4,421 | <i>KIAA1277</i>     | -1.210775254 |
| 4,422 | <i>ETF1</i>         | -1.21064119  |
| 4,423 | <i>DAP</i>          | -1.210433966 |
| 4,424 | <i>RAF1</i>         | -1.210403626 |
| 4,425 | <i>NPEPL1</i>       | -1.209751627 |
| 4,426 | <i>THRAP5</i>       | -1.209627983 |
| 4,427 | <i>SFRS1</i>        | -1.209623109 |
| 4,428 | <i>CASC1</i>        | -1.209419282 |
| 4,429 | <i>S100A15</i>      | -1.209073541 |
| 4,430 | <i>OR2T12</i>       | -1.208948452 |
| 4,431 | <i>NOL5A</i>        | -1.208944232 |
| 4,432 | <i>KCNA7</i>        | -1.208768507 |
| 4,433 | <i>PTPLA</i>        | -1.208705621 |
| 4,434 | <i>LOC221955</i>    | -1.208411242 |
| 4,435 | <i>PCF11</i>        | -1.208399082 |
| 4,436 | <i>MGC34132</i>     | -1.208275031 |
| 4,437 | <i>LOC163590</i>    | -1.208006012 |
| 4,438 | <i>DKFZP547N043</i> | -1.208003154 |
| 4,439 | <i>VEGFB</i>        | -1.207791273 |
| 4,440 | <i>PPID</i>         | -1.207644648 |
| 4,441 | <i>TFAP2A</i>       | -1.207279109 |
| 4,442 | <i>LOC374395</i>    | -1.207222468 |
| 4,443 | <i>TSPAN3</i>       | -1.207165173 |
| 4,444 | <i>FLJ21062</i>     | -1.207094719 |
| 4,445 | <i>GNB2</i>         | -1.20699862  |
| 4,446 | <i>MRO</i>          | -1.206978878 |
| 4,447 | <i>AP3M2</i>        | -1.206976764 |
| 4,448 | <i>PMP22</i>        | -1.206603536 |
| 4,449 | <i>AMBP</i>         | -1.206566096 |
| 4,450 | <i>PRB4</i>         | -1.206474158 |
| 4,451 | <i>SLC5A12</i>      | -1.206451583 |
| 4,452 | <i>RAPGEF1</i>      | -1.206401255 |
| 4,453 | <i>ZNF339</i>       | -1.206372636 |
| 4,454 | <i>FLJ44216</i>     | -1.206277351 |
| 4,455 | <i>TM6SF1</i>       | -1.206124986 |
| 4,456 | <i>FKBP6</i>        | -1.206105444 |

|       |                     |              |
|-------|---------------------|--------------|
| 4,457 | <i>FLJ10815</i>     | -1.206095636 |
| 4,458 | <i>ROCK1</i>        | -1.206047089 |
| 4,459 | <i>BCL9</i>         | -1.205958006 |
| 4,460 | <i>C3ORF4</i>       | -1.205896495 |
| 4,461 | <i>RHPN1</i>        | -1.205794413 |
| 4,462 | <i>TUBGCP3</i>      | -1.205723324 |
| 4,463 | <i>APRG1</i>        | -1.205654421 |
| 4,464 | <i>C13ORF3</i>      | -1.205575462 |
| 4,465 | <i>FLJ32569</i>     | -1.204834143 |
| 4,466 | <i>SLN</i>          | -1.204629437 |
| 4,467 | <i>TIEG2</i>        | -1.204451357 |
| 4,468 | <i>SPAP1</i>        | -1.20436117  |
| 4,469 | <i>IMPA1</i>        | -1.20428201  |
| 4,470 | <i>STAT3</i>        | -1.204202889 |
| 4,471 | <i>LOC340543</i>    | -1.203972364 |
| 4,472 | <i>NSMCE1</i>       | -1.203425044 |
| 4,473 | <i>SOLH</i>         | -1.203263225 |
| 4,474 | <i>PPFIBP1</i>      | -1.203201128 |
| 4,475 | <i>LOC124491</i>    | -1.203158319 |
| 4,476 | <i>ZNF206</i>       | -1.202725755 |
| 4,477 | <i>LGALS3BP</i>     | -1.202675287 |
| 4,478 | <i>AKR1B10</i>      | -1.202672552 |
| 4,479 | <i>AGPS</i>         | -1.202443054 |
| 4,480 | <i>FAM16AX</i>      | -1.202436048 |
| 4,481 | <i>GLI3</i>         | -1.202173146 |
| 4,482 | <i>EPO</i>          | -1.202021079 |
| 4,483 | <i>CTSK</i>         | -1.20178183  |
| 4,484 | <i>CXORF6</i>       | -1.201694721 |
| 4,485 | <i>HAGH</i>         | -1.201544958 |
| 4,486 | <i>KIAA1407</i>     | -1.201390066 |
| 4,487 | <i>KIAA1407</i>     | -1.201390066 |
| 4,488 | <i>RRM1</i>         | -1.201369401 |
| 4,489 | <i>KEAP1</i>        | -1.201270158 |
| 4,490 | <i>SNX14</i>        | -1.201234551 |
| 4,491 | <i>ITIH4</i>        | -1.201220868 |
| 4,492 | <i>MARCKS</i>       | -1.201028015 |
| 4,493 | <i>OR5M8</i>        | -1.20100472  |
| 4,494 | <i>CCL14</i>        | -1.200872676 |
| 4,495 | <i>FLJ10326</i>     | -1.200834029 |
| 4,496 | <i>DEPDC5</i>       | -1.200765263 |
| 4,497 | <i>XTP3TPA</i>      | -1.200749425 |
| 4,498 | <i>UNQ9356</i>      | -1.20040591  |
| 4,499 | <i>SPO11</i>        | -1.200364448 |
| 4,500 | <i>GPR116</i>       | -1.200293398 |
| 4,501 | <i>FLJ22494</i>     | -1.200288231 |
| 4,502 | <i>COL23A1</i>      | -1.199698891 |
| 4,503 | <i>DKFZP434C171</i> | -1.199543701 |



|       |           |              |
|-------|-----------|--------------|
| 4,504 | ZNF426    | -1.199488498 |
| 4,505 | KIR3DL1   | -1.199311338 |
| 4,506 | B4GALT2   | -1.199166995 |
| 4,507 | SITPEC    | -1.199068254 |
| 4,508 | DDX41     | -1.19901198  |
| 4,509 | GALNTL5   | -1.19896217  |
| 4,510 | LOC113444 | -1.198860993 |
| 4,511 | OR51D1    | -1.198645664 |
| 4,512 | LOC286075 | -1.198434187 |
| 4,513 | HTF9C     | -1.198354233 |
| 4,514 | FRG1      | -1.198319354 |
| 4,515 | NIF3L1BP1 | -1.198277845 |
| 4,516 | FOXQ1     | -1.198203044 |
| 4,517 | TRY1      | -1.198197815 |
| 4,518 | LOC159090 | -1.198058585 |
| 4,519 | LMAN2L    | -1.197938425 |
| 4,520 | GLCE      | -1.19786694  |
| 4,521 | FKBPL     | -1.197610855 |
| 4,522 | C6ORF148  | -1.197483014 |
| 4,523 | TNFSF13   | -1.197474149 |
| 4,524 | RRH       | -1.197441533 |
| 4,525 | LOC284021 | -1.197371849 |
| 4,526 | NEK11     | -1.197277739 |
| 4,527 | RFK       | -1.197142237 |
| 4,528 | P2RY14    | -1.197111307 |
| 4,529 | TMPRSS11F | -1.197041475 |
| 4,530 | CLASP1    | -1.196945797 |
| 4,531 | CLK1      | -1.196883094 |
| 4,532 | RIN3      | -1.196865412 |
| 4,533 | KCNH2     | -1.196681808 |
| 4,534 | SSA2      | -1.196560445 |
| 4,535 | TBX22     | -1.196462234 |
| 4,536 | PPP3R1    | -1.196422923 |
| 4,537 | OR51B5    | -1.196420204 |
| 4,538 | CLEC4E    | -1.196419583 |
| 4,539 | MGC32020  | -1.196197423 |
| 4,540 | BCL10     | -1.196142804 |
| 4,541 | RPUSD4    | -1.196100803 |
| 4,542 | HRMT1L4   | -1.195993004 |
| 4,543 | LOC124512 | -1.195520909 |
| 4,544 | ALG3      | -1.195458846 |
| 4,545 | SMARCD3   | -1.19520662  |
| 4,546 | RNF34     | -1.195111817 |
| 4,547 | RAB11B    | -1.19501581  |
| 4,548 | FLJ20272  | -1.194836402 |
| 4,549 | HSFY1     | -1.194550973 |
| 4,550 | MYADM     | -1.194521307 |

|       |                 |              |
|-------|-----------------|--------------|
| 4,551 | <i>MCM2</i>     | -1.194476364 |
| 4,552 | <i>PRX</i>      | -1.194359693 |
| 4,553 | <i>CUL5</i>     | -1.194159065 |
| 4,554 | <i>FLJ38507</i> | -1.19401956  |
| 4,555 | <i>GBAS</i>     | -1.194010926 |
| 4,556 | <i>MAN1B1</i>   | -1.193882633 |
| 4,557 | <i>REPS2</i>    | -1.193758675 |
| 4,558 | <i>MGC5509</i>  | -1.193669417 |
| 4,559 | <i>C20ORF6</i>  | -1.193623792 |
| 4,560 | <i>JAM3</i>     | -1.192987372 |
| 4,561 | <i>PHF17</i>    | -1.19289522  |
| 4,562 | <i>C5orf18</i>  | -1.192520566 |
| 4,563 | <i>DIO3</i>     | -1.192350363 |
| 4,564 | <i>C7ORF20</i>  | -1.192256954 |
| 4,565 | <i>AHRR</i>     | -1.1919013   |
| 4,566 | <i>FLJ12806</i> | -1.191828456 |
| 4,567 | <i>FHOD3</i>    | -1.191774672 |
| 4,568 | <i>FHOD3</i>    | -1.191774672 |
| 4,569 | <i>GORASP1</i>  | -1.191760206 |
| 4,570 | <i>KIAA0427</i> | -1.191585167 |
| 4,571 | <i>DLG3</i>     | -1.191562375 |
| 4,572 | <i>NEO1</i>     | -1.191457854 |
| 4,573 | <i>PRY2</i>     | -1.191260023 |
| 4,574 | <i>TEK</i>      | -1.191057276 |
| 4,575 | <i>SURF6</i>    | -1.191025221 |
| 4,576 | <i>MGC46496</i> | -1.190801888 |
| 4,577 | <i>HPN</i>      | -1.190731871 |
| 4,578 | <i>MEN1</i>     | -1.190197114 |
| 4,579 | <i>IREM2</i>    | -1.189948124 |
| 4,580 | <i>PPM1D</i>    | -1.189905274 |
| 4,581 | <i>FLJ14299</i> | -1.189884354 |
| 4,582 | <i>NXF5</i>     | -1.189805846 |
| 4,583 | <i>ST8SIA3</i>  | -1.189721901 |
| 4,584 | <i>FSIP1</i>    | -1.189483039 |
| 4,585 | <i>ING4</i>     | -1.189437377 |
| 4,586 | <i>PLXNB3</i>   | -1.189307841 |
| 4,587 | <i>GAL3ST1</i>  | -1.189244541 |
| 4,588 | <i>DNCL12</i>   | -1.189214468 |
| 4,589 | <i>KRT20</i>    | -1.189096896 |
| 4,590 | <i>CCL3</i>     | -1.189015379 |
| 4,591 | <i>OR4N2</i>    | -1.188836635 |
| 4,592 | <i>OR4N2</i>    | -1.188836635 |
| 4,593 | <i>APLP1</i>    | -1.188817552 |
| 4,594 | <i>MGC2803</i>  | -1.188736536 |
| 4,595 | <i>SCAP2</i>    | -1.188722222 |
| 4,596 | <i>SEMA6A</i>   | -1.188637853 |
| 4,597 | <i>RETNLB</i>   | -1.188452193 |

|       |                 |              |
|-------|-----------------|--------------|
| 4,598 | <i>MGC23985</i> | -1.188336574 |
| 4,599 | <i>NRD1</i>     | -1.188055407 |
| 4,600 | <i>PRPF4B</i>   | -1.187853413 |
| 4,601 | <i>DSCR6</i>    | -1.187638441 |
| 4,602 | <i>CXCL11</i>   | -1.187589163 |
| 4,603 | <i>FLJ46061</i> | -1.187533913 |
| 4,604 | <i>TGM4</i>     | -1.187493133 |
| 4,605 | <i>HTR2B</i>    | -1.187462554 |
| 4,606 | <i>LCE3D</i>    | -1.187273827 |
| 4,607 | <i>CDCA7L</i>   | -1.187222827 |
| 4,608 | <i>DDX24</i>    | -1.187147707 |
| 4,609 | <i>EXOC2</i>    | -1.186856826 |
| 4,610 | <i>TRPC6</i>    | -1.186834102 |
| 4,611 | <i>ZMYND12</i>  | -1.186610383 |
| 4,612 | <i>C11ORF8</i>  | -1.186547321 |
| 4,613 | <i>TRRAP</i>    | -1.186541594 |
| 4,614 | <i>KIAA1596</i> | -1.186533369 |
| 4,615 | <i>RALGDS</i>   | -1.186504111 |
| 4,616 | <i>PTD008</i>   | -1.186300072 |
| 4,617 | <i>ANKMY1</i>   | -1.186132854 |
| 4,618 | <i>ECSM2</i>    | -1.186109604 |
| 4,619 | <i>BAK1</i>     | -1.185953593 |
| 4,620 | <i>ATP6V1G2</i> | -1.185730703 |
| 4,621 | <i>NOS3</i>     | -1.185617798 |
| 4,622 | <i>MGC3248</i>  | -1.185523624 |
| 4,623 | <i>HCN4</i>     | -1.185502938 |
| 4,624 | <i>HDAC7A</i>   | -1.185447827 |
| 4,625 | <i>KIAA1411</i> | -1.185417961 |
| 4,626 | <i>NANOS1</i>   | -1.185266241 |
| 4,627 | <i>APAF1</i>    | -1.185226797 |
| 4,628 | <i>IL15RA</i>   | -1.185180681 |
| 4,629 | <i>FUCA2</i>    | -1.185136365 |
| 4,630 | <i>CYLD</i>     | -1.185083922 |
| 4,631 | <i>MAGOH</i>    | -1.184986732 |
| 4,632 | <i>RPGR</i>     | -1.184924446 |
| 4,633 | <i>USP46</i>    | -1.184855486 |
| 4,634 | <i>ZDHHC15</i>  | -1.184674674 |
| 4,635 | <i>CACNA1F</i>  | -1.184575496 |
| 4,636 | <i>RFX2</i>     | -1.184553981 |
| 4,637 | <i>PAX7</i>     | -1.184191164 |
| 4,638 | <i>TLL2</i>     | -1.183976673 |
| 4,639 | <i>CDH2</i>     | -1.183957917 |
| 4,640 | <i>KIAA1977</i> | -1.183912361 |
| 4,641 | <i>HSF2BP</i>   | -1.183694602 |
| 4,642 | <i>ZNF497</i>   | -1.183681836 |
| 4,643 | <i>INSL6</i>    | -1.183604862 |
| 4,644 | <i>BGR</i>      | -1.183604597 |

|       |                      |              |
|-------|----------------------|--------------|
| 4,645 | <i>VEGF</i>          | -1.183584423 |
| 4,646 | <i>C10ORF12</i>      | -1.18358151  |
| 4,647 | <i>KLF13</i>         | -1.183555893 |
| 4,648 | <i>ARHGAP28</i>      | -1.183209013 |
| 4,649 | <i>GLI2</i>          | -1.183143236 |
| 4,650 | <i>DKFZP564F0522</i> | -1.18278015  |
| 4,651 | <i>YIPF6</i>         | -1.182516257 |
| 4,652 | <i>LOC343413</i>     | -1.18227172  |
| 4,653 | <i>SPIN3</i>         | -1.182078465 |
| 4,654 | <i>C11ORF5</i>       | -1.182057065 |
| 4,655 | <i>KIAA0586</i>      | -1.182027978 |
| 4,656 | <i>MR1</i>           | -1.181966275 |
| 4,657 | <i>SMP3</i>          | -1.181877738 |
| 4,658 | <i>KRT14</i>         | -1.181826107 |
| 4,659 | <i>MGC23947</i>      | -1.181627801 |
| 4,660 | <i>LRRC2</i>         | -1.181594361 |
| 4,661 | <i>TSC1</i>          | -1.181589767 |
| 4,662 | <i>FCGR3A</i>        | -1.18152543  |
| 4,663 | <i>USP32</i>         | -1.181433079 |
| 4,664 | <i>DDEFL1</i>        | -1.181048974 |
| 4,665 | <i>LGALS8</i>        | -1.180941454 |
| 4,666 | <i>C14ORF129</i>     | -1.180926746 |
| 4,667 | <i>WRB</i>           | -1.180898785 |
| 4,668 | <i>CDH15</i>         | -1.180859513 |
| 4,669 | <i>IL17R</i>         | -1.180751634 |
| 4,670 | <i>STOML1</i>        | -1.180734271 |
| 4,671 | <i>TLL4</i>          | -1.180711433 |
| 4,672 | <i>FKBP1A</i>        | -1.180711433 |
| 4,673 | <i>RNF31</i>         | -1.180645776 |
| 4,674 | <i>NFIL3</i>         | -1.18061487  |
| 4,675 | <i>MAP1LC3C</i>      | -1.180560823 |
| 4,676 | <i>UBE2F</i>         | -1.180546936 |
| 4,677 | <i>GPR133</i>        | -1.180492607 |
| 4,678 | <i>SLC25A14</i>      | -1.180326657 |
| 4,679 | <i>XPC</i>           | -1.180196671 |
| 4,680 | <i>ASB16</i>         | -1.180103423 |
| 4,681 | <i>C20ORF151</i>     | -1.179807914 |
| 4,682 | <i>PFAS</i>          | -1.17957695  |
| 4,683 | <i>CCL26</i>         | -1.179572104 |
| 4,684 | <i>IL17RB</i>        | -1.179350637 |
| 4,685 | <i>PIGM</i>          | -1.179251776 |
| 4,686 | <i>RPL4</i>          | -1.17910466  |
| 4,687 | <i>PHKA1</i>         | -1.179083327 |
| 4,688 | <i>FLJ16008</i>      | -1.179046483 |
| 4,689 | <i>COMMD4</i>        | -1.178727768 |
| 4,690 | <i>MYO6</i>          | -1.178555713 |
| 4,691 | <i>SMC5L1</i>        | -1.178550344 |

|       |           |              |
|-------|-----------|--------------|
| 4,692 | TTC3      | -1.178432312 |
| 4,693 | NFE2L3    | -1.178100995 |
| 4,694 | CYP3A5    | -1.178010845 |
| 4,695 | ZNF138    | -1.177895927 |
| 4,696 | NPD007    | -1.177876643 |
| 4,697 | HPCAL1    | -1.177786782 |
| 4,698 | LCAT      | -1.177749694 |
| 4,699 | C6ORF97   | -1.177529178 |
| 4,700 | PAEP      | -1.177476073 |
| 4,701 | PLA1A     | -1.177460845 |
| 4,702 | SPINK1    | -1.177459039 |
| 4,703 | LDHAL6A   | -1.177431372 |
| 4,704 | EDN2      | -1.176912969 |
| 4,705 | KYNU      | -1.176402504 |
| 4,706 | PTPRU     | -1.176265807 |
| 4,707 | FLJ20130  | -1.176210777 |
| 4,708 | CHAT      | -1.175989457 |
| 4,709 | SRP68     | -1.175936461 |
| 4,710 | OPA1      | -1.175934797 |
| 4,711 | FLJ46266  | -1.175795693 |
| 4,712 | GABRA2    | -1.175538858 |
| 4,713 | LOC152185 | -1.175001927 |
| 4,714 | FLJ11155  | -1.174805462 |
| 4,715 | PTPRC     | -1.17479127  |
| 4,716 | GPR83     | -1.174562899 |
| 4,717 | PNPO      | -1.174489138 |
| 4,718 | LOC146562 | -1.174453772 |
| 4,719 | SYCP1     | -1.174360867 |
| 4,720 | CDH11     | -1.174262842 |
| 4,721 | SEC61B    | -1.173977569 |
| 4,722 | HARS2     | -1.173951693 |
| 4,723 | C6ORF113  | -1.173879356 |
| 4,724 | C6ORF113  | -1.173879356 |
| 4,725 | AAK1      | -1.173875174 |
| 4,726 | FLJ10307  | -1.173850831 |
| 4,727 | PUNC      | -1.173101413 |
| 4,728 | FLJ43752  | -1.172745955 |
| 4,729 | FLJ16231  | -1.172744617 |
| 4,730 | LOC147111 | -1.172619877 |
| 4,731 | FLJ14627  | -1.172521694 |
| 4,732 | DMAP1     | -1.172324659 |
| 4,733 | FLJ31164  | -1.172312506 |
| 4,734 | LOC143458 | -1.172218877 |
| 4,735 | MGC11271  | -1.171688908 |
| 4,736 | BICD2     | -1.171406718 |
| 4,737 | RNASE13   | -1.17135264  |
| 4,738 | TEX10     | -1.171323728 |

|       |                  |              |
|-------|------------------|--------------|
| 4,739 | <i>FLJ22688</i>  | -1.171097966 |
| 4,740 | <i>FLJ46299</i>  | -1.171084555 |
| 4,741 | <i>SLC5A10</i>   | -1.170765923 |
| 4,742 | <i>GTF3A</i>     | -1.170537266 |
| 4,743 | <i>KIF15</i>     | -1.170112713 |
| 4,744 | <i>CES3</i>      | -1.169953    |
| 4,745 | <i>NISCH</i>     | -1.169916432 |
| 4,746 | <i>CXORF9</i>    | -1.169877355 |
| 4,747 | <i>OR4F5</i>     | -1.16986112  |
| 4,748 | <i>FGF10</i>     | -1.16981456  |
| 4,749 | <i>ARIH1</i>     | -1.16963992  |
| 4,750 | <i>TAIP-2</i>    | -1.16963181  |
| 4,751 | <i>GK2</i>       | -1.16962967  |
| 4,752 | <i>SULT6B1</i>   | -1.169626635 |
| 4,753 | <i>CHRM2</i>     | -1.169544152 |
| 4,754 | <i>ST3GAL2</i>   | -1.169299425 |
| 4,755 | <i>ARL3</i>      | -1.169173781 |
| 4,756 | <i>GSTP1</i>     | -1.169119677 |
| 4,757 | <i>WFDC12</i>    | -1.168935633 |
| 4,758 | <i>FLJ36492</i>  | -1.168870774 |
| 4,759 | <i>DEFB116</i>   | -1.168780727 |
| 4,760 | <i>ZNF148</i>    | -1.16874609  |
| 4,761 | <i>SGOL2</i>     | -1.168737161 |
| 4,762 | <i>FLJ12592</i>  | -1.168674726 |
| 4,763 | <i>PTH</i>       | -1.168373122 |
| 4,764 | <i>LOC388910</i> | -1.16830748  |
| 4,765 | <i>MDAC1</i>     | -1.168168168 |
| 4,766 | <i>CHRNE</i>     | -1.168125096 |
| 4,767 | <i>STAT4</i>     | -1.168059066 |
| 4,768 | <i>ENAH</i>      | -1.168029519 |
| 4,769 | <i>WFIKKNRP</i>  | -1.167546208 |
| 4,770 | <i>FUBP3</i>     | -1.167495102 |
| 4,771 | <i>POGZ</i>      | -1.167405549 |
| 4,772 | <i>RTN4IP1</i>   | -1.167393363 |
| 4,773 | <i>KIAA0350</i>  | -1.167325752 |
| 4,774 | <i>KIAA1280</i>  | -1.167290633 |
| 4,775 | <i>ABCC8</i>     | -1.167026761 |
| 4,776 | <i>SAMD3</i>     | -1.166885039 |
| 4,777 | <i>ABHD4</i>     | -1.166676365 |
| 4,778 | <i>KIAA1305</i>  | -1.166552772 |
| 4,779 | <i>BPIL1</i>     | -1.166525016 |
| 4,780 | <i>PHF14</i>     | -1.166301763 |
| 4,781 | <i>ATCAY</i>     | -1.166247289 |
| 4,782 | <i>TBX4</i>      | -1.166135866 |
| 4,783 | <i>HTR3C</i>     | -1.166012837 |
| 4,784 | <i>DDIT3</i>     | -1.165975701 |
| 4,785 | <i>SCNM1</i>     | -1.165527126 |

|       |                  |              |
|-------|------------------|--------------|
| 4,786 | <i>MTRF1L</i>    | -1.165444527 |
| 4,787 | <i>VN1R5</i>     | -1.165289081 |
| 4,788 | <i>ZMYND11</i>   | -1.16516459  |
| 4,789 | <i>KCNG3</i>     | -1.165104675 |
| 4,790 | <i>LENG9</i>     | -1.165050136 |
| 4,791 | <i>LRRC1</i>     | -1.164852702 |
| 4,792 | <i>CHRAC1</i>    | -1.164387656 |
| 4,793 | <i>TINP1</i>     | -1.164234708 |
| 4,794 | <i>LOC220032</i> | -1.163931325 |
| 4,795 | <i>SNF1LK</i>    | -1.163930248 |
| 4,796 | <i>KL</i>        | -1.163847133 |
| 4,797 | <i>SERPIND1</i>  | -1.163627921 |
| 4,798 | <i>TYK2</i>      | -1.163477482 |
| 4,799 | <i>CECR6</i>     | -1.163224138 |
| 4,800 | <i>PIK3CG</i>    | -1.163140958 |
| 4,801 | <i>HSD3B1</i>    | -1.163113929 |
| 4,802 | <i>ANKHD1</i>    | -1.162996196 |
| 4,803 | <i>LOC374569</i> | -1.162988138 |
| 4,804 | <i>ACCN1</i>     | -1.162980437 |
| 4,805 | <i>SNRPD2</i>    | -1.162758219 |
| 4,806 | <i>ARID2</i>     | -1.162339375 |
| 4,807 | <i>ZNF281</i>    | -1.162206117 |
| 4,808 | <i>CACNA1D</i>   | -1.162080247 |
| 4,809 | <i>GPR77</i>     | -1.161866765 |
| 4,810 | <i>FLJ12604</i>  | -1.161809474 |
| 4,811 | <i>EOMES</i>     | -1.161633972 |
| 4,812 | <i>FLJ46072</i>  | -1.16136367  |
| 4,813 | <i>KIAA0141</i>  | -1.161197048 |
| 4,814 | <i>CRR9</i>      | -1.161146436 |
| 4,815 | <i>PRDM13</i>    | -1.161005755 |
| 4,816 | <i>NALP4</i>     | -1.160916136 |
| 4,817 | <i>NCKIPSD</i>   | -1.160810315 |
| 4,818 | <i>LOC653275</i> | -1.16077184  |
| 4,819 | <i>SEN2</i>      | -1.160764521 |
| 4,820 | <i>C6ORF153</i>  | -1.16041945  |
| 4,821 | <i>FABP6</i>     | -1.160323709 |
| 4,822 | <i>HRMT1L2</i>   | -1.160246353 |
| 4,823 | <i>AEBP2</i>     | -1.160075014 |
| 4,824 | <i>OTOR</i>      | -1.160016319 |
| 4,825 | <i>SMOC2</i>     | -1.159723391 |
| 4,826 | <i>RAD9A</i>     | -1.159589974 |
| 4,827 | <i>ARL11</i>     | -1.159553416 |
| 4,828 | <i>LOC81691</i>  | -1.15946793  |
| 4,829 | <i>TUBA8</i>     | -1.15933623  |
| 4,830 | <i>C9ORF42</i>   | -1.159108742 |
| 4,831 | <i>SCGB1D4</i>   | -1.158900495 |
| 4,832 | <i>LOC147965</i> | -1.158612862 |

|       |                  |              |
|-------|------------------|--------------|
| 4,833 | <i>SAFB2</i>     | -1.158385849 |
| 4,834 | <i>ZNF442</i>    | -1.158362798 |
| 4,835 | <i>LOC286148</i> | -1.158263779 |
| 4,836 | <i>SOCS2</i>     | -1.158098387 |
| 4,837 | <i>TRIM9</i>     | -1.158075045 |
| 4,838 | <i>CLECSF8</i>   | -1.158067885 |
| 4,839 | <i>MGC31967</i>  | -1.158039067 |
| 4,840 | <i>LOC91464</i>  | -1.158027669 |
| 4,841 | <i>DVL1</i>      | -1.157981486 |
| 4,842 | <i>LDB2</i>      | -1.15787986  |
| 4,843 | <i>AKAP12</i>    | -1.157870983 |
| 4,844 | <i>LTBR</i>      | -1.157738871 |
| 4,845 | <i>GPR147</i>    | -1.157525618 |
| 4,846 | <i>CARD15</i>    | -1.15749916  |
| 4,847 | <i>AK3</i>       | -1.157292119 |
| 4,848 | <i>FAM7A2</i>    | -1.15725434  |
| 4,849 | <i>CPM</i>       | -1.15711494  |
| 4,850 | <i>LOC152573</i> | -1.156995396 |
| 4,851 | <i>ANGPT1</i>    | -1.156934032 |
| 4,852 | <i>ATP6AP1</i>   | -1.156792834 |
| 4,853 | <i>PSMB7</i>     | -1.15674936  |
| 4,854 | <i>FAIM</i>      | -1.156646842 |
| 4,855 | <i>GDF7</i>      | -1.156603423 |
| 4,856 | <i>TACR1</i>     | -1.156576315 |
| 4,857 | <i>DDX58</i>     | -1.156480323 |
| 4,858 | <i>NIF3L1</i>    | -1.156382323 |
| 4,859 | <i>CD5L</i>      | -1.156320976 |
| 4,860 | <i>HSPC152</i>   | -1.156242846 |
| 4,861 | <i>CCL25</i>     | -1.156076387 |
| 4,862 | <i>HGF</i>       | -1.155735518 |
| 4,863 | <i>KDR</i>       | -1.155687157 |
| 4,864 | <i>ADORA2A</i>   | -1.155422685 |
| 4,865 | <i>MYOZ1</i>     | -1.155320829 |
| 4,866 | <i>MGC26885</i>  | -1.155297525 |
| 4,867 | <i>TPARL</i>     | -1.155234966 |
| 4,868 | <i>INCA</i>      | -1.155193855 |
| 4,869 | <i>LIN7C</i>     | -1.155109118 |
| 4,870 | <i>PITPNB</i>    | -1.155023642 |
| 4,871 | <i>TAF1B</i>     | -1.154857928 |
| 4,872 | <i>SCN10A</i>    | -1.154755035 |
| 4,873 | <i>RAB6C</i>     | -1.154701753 |
| 4,874 | <i>CFHL5</i>     | -1.154517262 |
| 4,875 | <i>MS4A3</i>     | -1.154389626 |
| 4,876 | <i>YARS</i>      | -1.154321058 |
| 4,877 | <i>VCY</i>       | -1.154306287 |
| 4,878 | <i>FLJ31413</i>  | -1.154291507 |
| 4,879 | <i>HAX1</i>      | -1.154087507 |



|       |                      |              |
|-------|----------------------|--------------|
| 4,880 | <i>LOC390748</i>     | -1.153846542 |
| 4,881 | <i>COPS7A</i>        | -1.153715295 |
| 4,882 | <i>KRTAP4-7</i>      | -1.153674042 |
| 4,883 | <i>C20ORF22</i>      | -1.153669607 |
| 4,884 | <i>MGC29875</i>      | -1.153588928 |
| 4,885 | <i>PDE4A</i>         | -1.153566305 |
| 4,886 | <i>PPIG</i>          | -1.153102338 |
| 4,887 | <i>TBC1D21</i>       | -1.152997051 |
| 4,888 | <i>LOC124402</i>     | -1.152917889 |
| 4,889 | <i>PRKAG1</i>        | -1.152581565 |
| 4,890 | <i>FLJ10661</i>      | -1.152488793 |
| 4,891 | <i>AVPR1A</i>        | -1.152383294 |
| 4,892 | <i>FLG</i>           | -1.152020844 |
| 4,893 | <i>C15ORF20</i>      | -1.15198285  |
| 4,894 | <i>REA</i>           | -1.151941683 |
| 4,895 | <i>TG</i>            | -1.151939322 |
| 4,896 | <i>NOXA1</i>         | -1.151906284 |
| 4,897 | <i>DDX19</i>         | -1.151646439 |
| 4,898 | <i>AIP1</i>          | -1.151281971 |
| 4,899 | <i>TTC10</i>         | -1.151253153 |
| 4,900 | <i>EGLN2</i>         | -1.15122526  |
| 4,901 | <i>AP2B1</i>         | -1.15095768  |
| 4,902 | <i>SLIT3</i>         | -1.15094378  |
| 4,903 | <i>COQ2</i>          | -1.150848462 |
| 4,904 | <i>SLC9A7</i>        | -1.15083826  |
| 4,905 | <i>GAL</i>           | -1.150753908 |
| 4,906 | <i>DRD2</i>          | -1.150710705 |
| 4,907 | <i>MAPK8IP2</i>      | -1.150607084 |
| 4,908 | <i>CHPT1</i>         | -1.150595257 |
| 4,909 | <i>UNK</i>           | -1.150548169 |
| 4,910 | <i>DC12</i>          | -1.15052928  |
| 4,911 | <i>DKFZP434H2010</i> | -1.150414267 |
| 4,912 | <i>USP34</i>         | -1.150401233 |
| 4,913 | <i>COVA1</i>         | -1.150380869 |
| 4,914 | <i>PCDH11X</i>       | -1.150291497 |
| 4,915 | <i>LOC388323</i>     | -1.150237616 |
| 4,916 | <i>GALNT13</i>       | -1.150234437 |
| 4,917 | <i>PXMP2</i>         | -1.150216475 |
| 4,918 | <i>SPRR2G</i>        | -1.150136782 |
| 4,919 | <i>MGC17624</i>      | -1.150136496 |
| 4,920 | <i>ROBO2</i>         | -1.150050787 |
| 4,921 | <i>ZNF85</i>         | -1.149953021 |
| 4,922 | <i>GAGEC1</i>        | -1.149814285 |
| 4,923 | <i>TAC1</i>          | -1.149767484 |
| 4,924 | <i>PNPLA2</i>        | -1.149706582 |
| 4,925 | <i>MGC23908</i>      | -1.149638492 |
| 4,926 | <i>PABPN1</i>        | -1.149440093 |

|       |                  |              |
|-------|------------------|--------------|
| 4,927 | <i>ERV3</i>      | -1.149034141 |
| 4,928 | <i>SEC23A</i>    | -1.149020527 |
| 4,929 | <i>SP8</i>       | -1.14899111  |
| 4,930 | <i>C2ORF24</i>   | -1.14897415  |
| 4,931 | <i>C20ORF85</i>  | -1.148953576 |
| 4,932 | <i>CASP14</i>    | -1.148725317 |
| 4,933 | <i>TMPIT</i>     | -1.148490725 |
| 4,934 | <i>FLJ21125</i>  | -1.148421364 |
| 4,935 | <i>CHRNB1</i>    | -1.148316183 |
| 4,936 | <i>PTMS</i>      | -1.148184159 |
| 4,937 | <i>ZNF14</i>     | -1.148153617 |
| 4,938 | <i>VGLL1</i>     | -1.147993757 |
| 4,939 | <i>FLJ23588</i>  | -1.14780066  |
| 4,940 | <i>RAB14</i>     | -1.147307645 |
| 4,941 | <i>ADAMTS20</i>  | -1.147240243 |
| 4,942 | <i>GNG3</i>      | -1.147169928 |
| 4,943 | <i>GNG3</i>      | -1.147169928 |
| 4,944 | <i>C6ORF29</i>   | -1.147158155 |
| 4,945 | <i>THEG</i>      | -1.147129225 |
| 4,946 | <i>PD2</i>       | -1.146704344 |
| 4,947 | <i>CEACAM1</i>   | -1.146589736 |
| 4,948 | <i>LOC148213</i> | -1.14652842  |
| 4,949 | <i>FKBP7</i>     | -1.146366235 |
| 4,950 | <i>C11ORF1</i>   | -1.146290576 |
| 4,951 | <i>MORC</i>      | -1.145794937 |
| 4,952 | <i>C1ORF19</i>   | -1.145643009 |
| 4,953 | <i>PSCD2</i>     | -1.145550219 |
| 4,954 | <i>POU2AF1</i>   | -1.145397076 |
| 4,955 | <i>IK</i>        | -1.14537864  |
| 4,956 | <i>WHSC1L1</i>   | -1.14518346  |
| 4,957 | <i>MMP9</i>      | -1.145060212 |
| 4,958 | <i>SLC22A7</i>   | -1.145010174 |
| 4,959 | <i>OR2B2</i>     | -1.144954847 |
| 4,960 | <i>ZNF74</i>     | -1.14494239  |
| 4,961 | <i>CHIC2</i>     | -1.144874064 |
| 4,962 | <i>CT47.8</i>    | -1.144836435 |
| 4,963 | <i>NKG7</i>      | -1.144784233 |
| 4,964 | <i>ST14</i>      | -1.144703878 |
| 4,965 | <i>DDX50</i>     | -1.144540219 |
| 4,966 | <i>PCIA1</i>     | -1.144366869 |
| 4,967 | <i>MGC15668</i>  | -1.144362464 |
| 4,968 | <i>FLJ21628</i>  | -1.14430694  |
| 4,969 | <i>MTL5</i>      | -1.143812234 |
| 4,970 | <i>VKORC1</i>    | -1.143627835 |
| 4,971 | <i>IL29</i>      | -1.143434221 |
| 4,972 | <i>KCNJ10</i>    | -1.143400446 |
| 4,973 | <i>CUEDC2</i>    | -1.143107912 |

|       |               |              |
|-------|---------------|--------------|
| 4,974 | DAZL          | -1.143035638 |
| 4,975 | ANK2          | -1.142998904 |
| 4,976 | CYP1A1        | -1.142917257 |
| 4,977 | ANP32C        | -1.142777843 |
| 4,978 | INPP5E        | -1.142763475 |
| 4,979 | SP7           | -1.142723788 |
| 4,980 | CGB8          | -1.142587478 |
| 4,981 | DMRT1         | -1.142535042 |
| 4,982 | NICE-3        | -1.142127951 |
| 4,983 | HOMER1        | -1.14206291  |
| 4,984 | LOC144983     | -1.141964543 |
| 4,985 | STAG3         | -1.141787641 |
| 4,986 | KLC2L         | -1.141154233 |
| 4,987 | C14ORF150     | -1.141145325 |
| 4,988 | ATP6V1D       | -1.140957    |
| 4,989 | DUSP6         | -1.140876919 |
| 4,990 | TF            | -1.140840898 |
| 4,991 | DNAJA5        | -1.140733314 |
| 4,992 | PAWR          | -1.14044067  |
| 4,993 | CPEB2         | -1.140416964 |
| 4,994 | SIPA1L2       | -1.140385112 |
| 4,995 | NICE-3        | -1.140208971 |
| 4,996 | CSTB          | -1.1401269   |
| 4,997 | DJ328E19.C1.1 | -1.139976418 |
| 4,998 | CCL19         | -1.139972312 |
| 4,999 | FAM38A        | -1.139686908 |
| 5,000 | DNASE1L1      | -1.1396699   |
| 5,001 | NDUFA2        | -1.139453703 |
| 5,002 | FLJ10514      | -1.139281504 |
| 5,003 | ADAMTS10      | -1.139015733 |
| 5,004 | LOC387733     | -1.13886676  |
| 5,005 | LOC400120     | -1.138831144 |
| 5,006 | LOC112937     | -1.138701248 |
| 5,007 | NUP93         | -1.138672502 |
| 5,008 | MRPS24        | -1.138636923 |
| 5,009 | GJA7          | -1.13862689  |
| 5,010 | CCR1          | -1.138541219 |
| 5,011 | IL2RA         | -1.138310693 |
| 5,012 | UNQ644        | -1.138170975 |
| 5,013 | FLJ42925      | -1.138016017 |
| 5,014 | CHDH          | -1.13783399  |
| 5,015 | HKR3          | -1.137683075 |
| 5,016 | CLECSF6       | -1.137662027 |
| 5,017 | KIRREL2       | -1.1369611   |
| 5,018 | FLJ39575      | -1.136895108 |
| 5,019 | LOC401190     | -1.136797197 |
| 5,020 | NPFF          | -1.136515094 |

|       |                      |              |
|-------|----------------------|--------------|
| 5,021 | <i>GTF2I</i>         | -1.1362104   |
| 5,022 | <i>LILRA3</i>        | -1.1361487   |
| 5,023 | <i>C10ORF77</i>      | -1.136139357 |
| 5,024 | <i>CHM</i>           | -1.136119238 |
| 5,025 | <i>LOC144245</i>     | -1.135887168 |
| 5,026 | <i>FAM7A2</i>        | -1.135849526 |
| 5,027 | <i>FLT3</i>          | -1.135849293 |
| 5,028 | <i>DKFZP564O0823</i> | -1.135653645 |
| 5,029 | <i>HIPK4</i>         | -1.135593271 |
| 5,030 | <i>KIAA0247</i>      | -1.135538915 |
| 5,031 | <i>IMAGE3451454</i>  | -1.135493531 |
| 5,032 | <i>MEIS3</i>         | -1.135462884 |
| 5,033 | <i>HLA-DOB</i>       | -1.135394839 |
| 5,034 | <i>TRIM61</i>        | -1.135058635 |
| 5,035 | <i>DNCL2B</i>        | -1.134926591 |
| 5,036 | <i>FLJ23233</i>      | -1.134771381 |
| 5,037 | <i>FOLR2</i>         | -1.134740714 |
| 5,038 | <i>IQCJ</i>          | -1.134647206 |
| 5,039 | <i>C9ORF67</i>       | -1.134106106 |
| 5,040 | <i>APEX1</i>         | -1.13407253  |
| 5,041 | <i>RABAC1</i>        | -1.134032518 |
| 5,042 | <i>LOC93380</i>      | -1.133844642 |
| 5,043 | <i>ALS2CR3</i>       | -1.133726216 |
| 5,044 | <i>LOC340529</i>     | -1.133717241 |
| 5,045 | <i>ZNF136</i>        | -1.133682692 |
| 5,046 | <i>OR5M3</i>         | -1.133530825 |
| 5,047 | <i>CGI-63</i>        | -1.133514204 |
| 5,048 | <i>FLJ14768</i>      | -1.133442286 |
| 5,049 | <i>FBLN2</i>         | -1.133090824 |
| 5,050 | <i>NME7</i>          | -1.133086876 |
| 5,051 | <i>PPP1R8</i>        | -1.132920455 |
| 5,052 | <i>OR52E6</i>        | -1.132745449 |
| 5,053 | <i>HERPUD1</i>       | -1.132631799 |
| 5,054 | <i>TRIP10</i>        | -1.132560331 |
| 5,055 | <i>ZNFN1A4</i>       | -1.132279093 |
| 5,056 | <i>PHTF2</i>         | -1.132217136 |
| 5,057 | <i>COG4</i>          | -1.132206056 |
| 5,058 | <i>MGC33894</i>      | -1.132180954 |
| 5,059 | <i>TIMM44</i>        | -1.132111589 |
| 5,060 | <i>SH2D4B</i>        | -1.132105227 |
| 5,061 | <i>OR6S1</i>         | -1.132093651 |
| 5,062 | <i>MGC71745</i>      | -1.132067056 |
| 5,063 | <i>UBA52</i>         | -1.132022533 |
| 5,064 | <i>NMUR2</i>         | -1.13202044  |
| 5,065 | <i>ATP5F1</i>        | -1.131977711 |
| 5,066 | <i>C5ORF14</i>       | -1.131967818 |
| 5,067 | <i>FOXN4</i>         | -1.13195943  |

|       |           |              |
|-------|-----------|--------------|
| 5,068 | ASTN      | -1.131950056 |
| 5,069 | EVX1      | -1.131918742 |
| 5,070 | LY9       | -1.131882544 |
| 5,071 | GTF2H1    | -1.131875874 |
| 5,072 | EIF4E3    | -1.13171278  |
| 5,073 | GPR162    | -1.131653753 |
| 5,074 | SLC7A2    | -1.13163143  |
| 5,075 | YWHAQ     | -1.131565302 |
| 5,076 | TDP1      | -1.131476557 |
| 5,077 | WDSUB1    | -1.131377845 |
| 5,078 | MGC29937  | -1.13125241  |
| 5,079 | KIAA1698  | -1.131220983 |
| 5,080 | SNX27     | -1.130683004 |
| 5,081 | FLJ38663  | -1.130644529 |
| 5,082 | RPLP0     | -1.130635628 |
| 5,083 | VN1R4     | -1.130585464 |
| 5,084 | LOC124751 | -1.130576966 |
| 5,085 | BPGM      | -1.13055516  |
| 5,086 | TNFRSF10C | -1.130460587 |
| 5,087 | MGC13040  | -1.130431614 |
| 5,088 | CTSE      | -1.130316218 |
| 5,089 | PFKL      | -1.130311403 |
| 5,090 | FLJ10300  | -1.130288393 |
| 5,091 | FLJ36119  | -1.13026662  |
| 5,092 | NELL1     | -1.130165533 |
| 5,093 | PARG1     | -1.130072339 |
| 5,094 | XRCC4     | -1.130070344 |
| 5,095 | MGC20235  | -1.129810115 |
| 5,096 | PKNOX1    | -1.129700862 |
| 5,097 | TAS2R38   | -1.12966484  |
| 5,098 | TERT      | -1.129594459 |
| 5,099 | PAPOLG    | -1.129391091 |
| 5,100 | MGC34079  | -1.129357659 |
| 5,101 | LOC157570 | -1.129357659 |
| 5,102 | TBX15     | -1.129006688 |
| 5,103 | PTDSS2    | -1.128920322 |
| 5,104 | CDCP1     | -1.128902743 |
| 5,105 | MGC13034  | -1.128863846 |
| 5,106 | MST1      | -1.128710217 |
| 5,107 | HTATIP    | -1.128325503 |
| 5,108 | WFDC3     | -1.1280652   |
| 5,109 | PDE10A    | -1.127918202 |
| 5,110 | MGC40214  | -1.127817027 |
| 5,111 | SCN5A     | -1.127611208 |
| 5,112 | FLJ10925  | -1.127118442 |
| 5,113 | HNMT      | -1.12709276  |
| 5,114 | EGFL9     | -1.126851787 |

|       |               |              |
|-------|---------------|--------------|
| 5,115 | HCG27         | -1.126808581 |
| 5,116 | DNAH5         | -1.126704426 |
| 5,117 | STK22B        | -1.126492179 |
| 5,118 | PQLC1         | -1.126459373 |
| 5,119 | MGC33962      | -1.126407636 |
| 5,120 | UGT1A5        | -1.126084117 |
| 5,121 | MAP2K1        | -1.125805909 |
| 5,122 | TOE1          | -1.125649761 |
| 5,123 | TGFBRAP1      | -1.125343879 |
| 5,124 | BXMAS2-10     | -1.125228607 |
| 5,125 | KSR           | -1.125057353 |
| 5,126 | KIAA1622      | -1.124817876 |
| 5,127 | RAET1E        | -1.124774742 |
| 5,128 | LOC199920     | -1.124739194 |
| 5,129 | SEMA6C        | -1.124412983 |
| 5,130 | TDRD3         | -1.123953696 |
| 5,131 | ZNF337        | -1.123867771 |
| 5,132 | RNMT          | -1.123777212 |
| 5,133 | LOC727830     | -1.123674427 |
| 5,134 | P2RX1         | -1.123673461 |
| 5,135 | LOC256394     | -1.123650708 |
| 5,136 | PPP4R2        | -1.123622726 |
| 5,137 | TPO           | -1.123450403 |
| 5,138 | BAZ1A         | -1.123177172 |
| 5,139 | COX8A         | -1.122942344 |
| 5,140 | DKFZP434N1817 | -1.122731543 |
| 5,141 | CHST2         | -1.122614721 |
| 5,142 | ZNF324        | -1.122278605 |
| 5,143 | SIRPB2        | -1.12225367  |
| 5,144 | MGC11332      | -1.12196683  |
| 5,145 | FLJ39779      | -1.121757723 |
| 5,146 | PRB2          | -1.121752116 |
| 5,147 | BARX1         | -1.121745072 |
| 5,148 | LOC388931     | -1.121393695 |
| 5,149 | USP18         | -1.121119561 |
| 5,150 | CST7          | -1.12111178  |
| 5,151 | LOC343637     | -1.120797067 |
| 5,152 | PODXL         | -1.120611398 |
| 5,153 | DYNC1H1       | -1.120576399 |
| 5,154 | PRRG2         | -1.120544541 |
| 5,155 | LRSAM1        | -1.120526069 |
| 5,156 | MYO1A         | -1.120419248 |
| 5,157 | NTRK2         | -1.120398999 |
| 5,158 | C20ORF174     | -1.120289893 |
| 5,159 | FMO1          | -1.12001357  |
| 5,160 | LOC139886     | -1.12001316  |
| 5,161 | PLEKHJ1       | -1.119947726 |

|       |                 |              |
|-------|-----------------|--------------|
| 5,162 | <i>TTPA</i>     | -1.119937105 |
| 5,163 | <i>NCAM2</i>    | -1.119925889 |
| 5,164 | <i>NETO1</i>    | -1.119925889 |
| 5,165 | <i>FLJ41131</i> | -1.119735595 |
| 5,166 | <i>ADRA1A</i>   | -1.11968281  |
| 5,167 | <i>HSPC154</i>  | -1.119620496 |
| 5,168 | <i>MN1</i>      | -1.119415708 |
| 5,169 | <i>HELLS</i>    | -1.119176035 |
| 5,170 | <i>LGALS4</i>   | -1.119004216 |
| 5,171 | <i>PHOX2A</i>   | -1.118908218 |
| 5,172 | <i>MYL3</i>     | -1.118779221 |
| 5,173 | <i>SLC6A18</i>  | -1.11877687  |
| 5,174 | <i>CXX1</i>     | -1.11876621  |
| 5,175 | <i>KIAA0753</i> | -1.118701344 |
| 5,176 | <i>OR10K1</i>   | -1.118593866 |
| 5,177 | <i>ELMO3</i>    | -1.118549547 |
| 5,178 | <i>C6ORF118</i> | -1.118471241 |
| 5,179 | <i>SYT8</i>     | -1.118382705 |
| 5,180 | <i>C9ORF93</i>  | -1.118203597 |
| 5,181 | <i>FLJ20811</i> | -1.118165357 |
| 5,182 | <i>MLCK</i>     | -1.118151443 |
| 5,183 | <i>GOLGA6</i>   | -1.118104769 |
| 5,184 | <i>MJD</i>      | -1.118072352 |
| 5,185 | <i>RBMS3</i>    | -1.117920343 |
| 5,186 | <i>ZNF579</i>   | -1.117876893 |
| 5,187 | <i>PPP1R14D</i> | -1.117839027 |
| 5,188 | <i>UCN2</i>     | -1.117816854 |
| 5,189 | <i>PARG</i>     | -1.117692546 |
| 5,190 | <i>IL15</i>     | -1.117685955 |
| 5,191 | <i>BHMT2</i>    | -1.11768015  |
| 5,192 | <i>POLR3K</i>   | -1.117604826 |
| 5,193 | <i>IRTA1</i>    | -1.117411381 |
| 5,194 | <i>FLJ40244</i> | -1.117267969 |
| 5,195 | <i>FUT1</i>     | -1.117214514 |
| 5,196 | <i>RPL34</i>    | -1.117213507 |
| 5,197 | <i>SART1</i>    | -1.117093677 |
| 5,198 | <i>CPNE8</i>    | -1.11691496  |
| 5,199 | <i>RABGGTB</i>  | -1.116384894 |
| 5,200 | <i>ERVWE1</i>   | -1.116311308 |
| 5,201 | <i>U5-200KD</i> | -1.116193707 |
| 5,202 | <i>KCNJ14</i>   | -1.116095646 |
| 5,203 | <i>CLTCL1</i>   | -1.115662533 |
| 5,204 | <i>MGC50844</i> | -1.115527332 |
| 5,205 | <i>ZNF482</i>   | -1.115429374 |
| 5,206 | <i>CLCA2</i>    | -1.115405014 |
| 5,207 | <i>TMEM14A</i>  | -1.115333168 |
| 5,208 | <i>CTSW</i>     | -1.115299637 |

|       |                          |              |
|-------|--------------------------|--------------|
| 5,209 | <i>KIAA0261</i>          | -1.115056562 |
| 5,210 | <i>PBXIP1</i>            | -1.115034104 |
| 5,211 | <i>FMR1</i>              | -1.114947753 |
| 5,212 | <i>FLJ35630</i>          | -1.114737725 |
| 5,213 | <i>OXT</i>               | -1.114702701 |
| 5,214 | <i>OR1E1</i>             | -1.114659295 |
| 5,215 | <i>GNB1L</i>             | -1.114644009 |
| 5,216 | <i>FLJ10260</i>          | -1.114603181 |
| 5,217 | <i>LOC200205</i>         | -1.114497052 |
| 5,218 | <i>ASPA</i>              | -1.114364394 |
| 5,219 | <i>RASL10B</i>           | -1.114334466 |
| 5,220 | <i>ZNF318</i>            | -1.114294658 |
| 5,221 | <i>RPL21</i>             | -1.114268648 |
| 5,222 | <i>CPT1B</i>             | -1.114268596 |
| 5,223 | <i>IFIT5</i>             | -1.113875068 |
| 5,224 | <i>SLC25A28</i>          | -1.113687558 |
| 5,225 | <i>MGC33864</i>          | -1.113657117 |
| 5,226 | <i>ZNF336</i>            | -1.113581005 |
| 5,227 | <i>FLJ20542</i>          | -1.113544757 |
| 5,228 | <i>MAPK3</i>             | -1.113431297 |
| 5,229 | <i>MRPS31</i>            | -1.11340334  |
| 5,230 | <i>HTR4</i>              | -1.113219111 |
| 5,231 | <i>TTLL3</i>             | -1.112829409 |
| 5,232 | <i>HES1</i>              | -1.112782044 |
| 5,233 | <i>KIAA1701</i>          | -1.112665248 |
| 5,234 | <i>HOM-<i>TES-85</i></i> | -1.112312289 |
| 5,235 | <i>C22ORF13</i>          | -1.112235727 |
| 5,236 | <i>IBTK</i>              | -1.112104387 |
| 5,237 | <i>RGMA</i>              | -1.111965487 |
| 5,238 | <i>MFAP4</i>             | -1.111688721 |
| 5,239 | <i>C20orf117</i>         | -1.111305517 |
| 5,240 | <i>CNGA4</i>             | -1.111163862 |
| 5,241 | <i>UBTD1</i>             | -1.11110737  |
| 5,242 | <i>TNRC6</i>             | -1.110900232 |
| 5,243 | <i>FLJ32825</i>          | -1.110692021 |
| 5,244 | <i>KRTAP5-5</i>          | -1.110614877 |
| 5,245 | <i>FLJ32784</i>          | -1.110329467 |
| 5,246 | <i>CGI-96</i>            | -1.109911827 |
| 5,247 | <i>LOC388199</i>         | -1.109870065 |
| 5,248 | <i>RAD9B</i>             | -1.109820823 |
| 5,249 | <i>ACACB</i>             | -1.109685409 |
| 5,250 | <i>OAS3</i>              | -1.109597056 |
| 5,251 | <i>MAGEB2</i>            | -1.109549827 |
| 5,252 | <i>IL7</i>               | -1.108939581 |
| 5,253 | <i>PHF6</i>              | -1.1087471   |
| 5,254 | <i>OIP5</i>              | -1.108647531 |
| 5,255 | <i>TAAR5</i>             | -1.108545633 |



|       |                    |              |
|-------|--------------------|--------------|
| 5,256 | <i>COL18A1</i>     | -1.108442128 |
| 5,257 | <i>RIC-8</i>       | -1.108345855 |
| 5,258 | <i>TLL2</i>        | -1.108174288 |
| 5,259 | <i>SOCS6</i>       | -1.10808694  |
| 5,260 | <i>KIAA0922</i>    | -1.107963136 |
| 5,261 | <i>KLHL8</i>       | -1.107466019 |
| 5,262 | <i>NIPSNAP3B</i>   | -1.107283781 |
| 5,263 | <i>SPANXA2</i>     | -1.107204456 |
| 5,264 | <i>TFAP2BL1</i>    | -1.107190206 |
| 5,265 | <i>GPR155</i>      | -1.107136435 |
| 5,266 | <i>LMTK2</i>       | -1.10680618  |
| 5,267 | <i>GUCA2A</i>      | -1.106776711 |
| 5,268 | <i>NUT</i>         | -1.106541851 |
| 5,269 | <i>OR5BU1</i>      | -1.106434238 |
| 5,270 | <i>CD8B1</i>       | -1.106189882 |
| 5,271 | <i>TAL1</i>        | -1.106135465 |
| 5,272 | <i>KNS2</i>        | -1.106062529 |
| 5,273 | <i>SIGLEC9</i>     | -1.105868303 |
| 5,274 | <i>FLJ35834</i>    | -1.105864923 |
| 5,275 | <i>PALM2-AKAP2</i> | -1.105820106 |
| 5,276 | <i>OTUD5</i>       | -1.105601871 |
| 5,277 | <i>CREBL2</i>      | -1.10552719  |
| 5,278 | <i>SF3B4</i>       | -1.105475001 |
| 5,279 | <i>CRISP3</i>      | -1.105449203 |
| 5,280 | <i>MDS025</i>      | -1.105389642 |
| 5,281 | <i>FGF17</i>       | -1.105253241 |
| 5,282 | <i>IRX1</i>        | -1.105167572 |
| 5,283 | <i>FLJ25351</i>    | -1.105090642 |
| 5,284 | <i>RNASET2</i>     | -1.104937252 |
| 5,285 | <i>GNAI3</i>       | -1.104821249 |
| 5,286 | <i>CLK4</i>        | -1.104738876 |
| 5,287 | <i>GTF3C4</i>      | -1.104505413 |
| 5,288 | <i>BLCAP</i>       | -1.103357613 |
| 5,289 | <i>FLJ32783</i>    | -1.103223509 |
| 5,290 | <i>FLJ39502</i>    | -1.102966312 |
| 5,291 | <i>RFX3</i>        | -1.102818864 |
| 5,292 | <i>PDE4B</i>       | -1.10270107  |
| 5,293 | <i>FLJ23436</i>    | -1.102651473 |
| 5,294 | <i>KIAA1450</i>    | -1.102451108 |
| 5,295 | <i>MGC10765</i>    | -1.102396148 |
| 5,296 | <i>LRP16</i>       | -1.10215084  |
| 5,297 | <i>MYO10</i>       | -1.101806421 |
| 5,298 | <i>KRTHB2</i>      | -1.10143151  |
| 5,299 | <i>MYBBP1A</i>     | -1.10139038  |
| 5,300 | <i>FRAG1</i>       | -1.101256205 |
| 5,301 | <i>ANXA2</i>       | -1.100838956 |
| 5,302 | <i>ZNF639</i>      | -1.100684533 |

|       |                  |              |
|-------|------------------|--------------|
| 5,303 | <i>LOC390874</i> | -1.100341829 |
| 5,304 | <i>RAP2C</i>     | -1.100325712 |
| 5,305 | <i>GC</i>        | -1.100315718 |
| 5,306 | <i>PORCN</i>     | -1.100124137 |
| 5,307 | <i>NETO2</i>     | -1.099799588 |
| 5,308 | <i>OR10AG1</i>   | -1.099766504 |
| 5,309 | <i>APG-1</i>     | -1.099722658 |
| 5,310 | <i>PDZRN3</i>    | -1.099503557 |
| 5,311 | <i>PLRG1</i>     | -1.099146755 |
| 5,312 | <i>LOC653140</i> | -1.099105864 |
| 5,313 | <i>KRTAP5-1</i>  | -1.0989668   |
| 5,314 | <i>TRPV6</i>     | -1.098929988 |
| 5,315 | <i>STMN3</i>     | -1.09868052  |
| 5,316 | <i>GALR2</i>     | -1.098626292 |
| 5,317 | <i>EPHB6</i>     | -1.098590666 |
| 5,318 | <i>HSPCA</i>     | -1.098399636 |
| 5,319 | <i>HBXAP</i>     | -1.098289147 |
| 5,320 | <i>EVI2A</i>     | -1.09798746  |
| 5,321 | <i>SELV</i>      | -1.097727081 |
| 5,322 | <i>MAD</i>       | -1.097670237 |
| 5,323 | <i>FILIP1</i>    | -1.097510895 |
| 5,324 | <i>SSB</i>       | -1.097182237 |
| 5,325 | <i>GLULD1</i>    | -1.097110396 |
| 5,326 | <i>SAMD7</i>     | -1.097049313 |
| 5,327 | <i>LOC146325</i> | -1.096765192 |
| 5,328 | <i>GCN5L2</i>    | -1.096654862 |
| 5,329 | <i>CYP2F1</i>    | -1.096645624 |
| 5,330 | <i>FLJ40172</i>  | -1.096583716 |
| 5,331 | <i>HCBP6</i>     | -1.096537006 |
| 5,332 | <i>C14ORF118</i> | -1.096387581 |
| 5,333 | <i>ZNF140</i>    | -1.096148171 |
| 5,334 | <i>BCOR</i>      | -1.096139694 |
| 5,335 | <i>ASB7</i>      | -1.096128013 |
| 5,336 | <i>FKSG83</i>    | -1.0959922   |
| 5,337 | <i>RNF186</i>    | -1.095686566 |
| 5,338 | <i>TPCN1</i>     | -1.095541048 |
| 5,339 | <i>MGC34732</i>  | -1.095363404 |
| 5,340 | <i>LOC642678</i> | -1.095041156 |
| 5,341 | <i>LIPE</i>      | -1.094817925 |
| 5,342 | <i>ANGPTL3</i>   | -1.094810751 |
| 5,343 | <i>FLJ13096</i>  | -1.094693375 |
| 5,344 | <i>BMP3</i>      | -1.094457836 |
| 5,345 | <i>UBE2N</i>     | -1.094230592 |
| 5,346 | <i>NIPSNAP1</i>  | -1.093592116 |
| 5,347 | <i>FLJ36004</i>  | -1.093478541 |
| 5,348 | <i>MRS2L</i>     | -1.093471579 |
| 5,349 | <i>CACNB4</i>    | -1.0933387   |

|       |                  |              |
|-------|------------------|--------------|
| 5,350 | <i>IL10RB</i>    | -1.093300089 |
| 5,351 | <i>ZNF3</i>      | -1.093221509 |
| 5,352 | <i>INTERSEX</i>  | -1.093149599 |
| 5,353 | <i>SMILE</i>     | -1.092989019 |
| 5,354 | <i>MAGEB1</i>    | -1.092637877 |
| 5,355 | <i>C14ORF154</i> | -1.092590958 |
| 5,356 | <i>ZNF614</i>    | -1.092521352 |
| 5,357 | <i>KPNA3</i>     | -1.092472393 |
| 5,358 | <i>SRD5A2L</i>   | -1.092422487 |
| 5,359 | <i>HYPB</i>      | -1.092062316 |
| 5,360 | <i>PGBD5</i>     | -1.092044795 |
| 5,361 | <i>OR7A5</i>     | -1.091981626 |
| 5,362 | <i>FLJ10997</i>  | -1.091892105 |
| 5,363 | <i>GNS</i>       | -1.091603913 |
| 5,364 | <i>FLJ12442</i>  | -1.091459192 |
| 5,365 | <i>MADP-1</i>    | -1.091411693 |
| 5,366 | <i>SMNDC1</i>    | -1.091292375 |
| 5,367 | <i>RB1</i>       | -1.090911199 |
| 5,368 | <i>FLJ39553</i>  | -1.090875795 |
| 5,369 | <i>RPL26L1</i>   | -1.090422282 |
| 5,370 | <i>FOLR3</i>     | -1.090187026 |
| 5,371 | <i>ITGB1BP2</i>  | -1.090136793 |
| 5,372 | <i>ZNF627</i>    | -1.09001472  |
| 5,373 | <i>PSG8</i>      | -1.089860916 |
| 5,374 | <i>LAMP2</i>     | -1.089722346 |
| 5,375 | <i>KCNK10</i>    | -1.089667248 |
| 5,376 | <i>WFDC10A</i>   | -1.089625948 |
| 5,377 | <i>KIAA1161</i>  | -1.089582249 |
| 5,378 | <i>PLCB4</i>     | -1.089295237 |
| 5,379 | <i>FLJ21820</i>  | -1.089187854 |
| 5,380 | <i>HSPC159</i>   | -1.088901248 |
| 5,381 | <i>MGC10992</i>  | -1.088769945 |
| 5,382 | <i>GPSM2</i>     | -1.088724373 |
| 5,383 | <i>GLRX</i>      | -1.088711    |
| 5,384 | <i>LOC440093</i> | -1.08869691  |
| 5,385 | <i>B4GALT3</i>   | -1.088561855 |
| 5,386 | <i>PDE6C</i>     | -1.088461957 |
| 5,387 | <i>MAP1LC3A</i>  | -1.088272876 |
| 5,388 | <i>PRG1</i>      | -1.088212503 |
| 5,389 | <i>FLJ12760</i>  | -1.088206222 |
| 5,390 | <i>FRS3</i>      | -1.088142092 |
| 5,391 | <i>FRS3</i>      | -1.088142092 |
| 5,392 | <i>PRPSAP2</i>   | -1.088069152 |
| 5,393 | <i>DISC1</i>     | -1.087952185 |
| 5,394 | <i>MOGAT1</i>    | -1.087795348 |
| 5,395 | <i>GNA11</i>     | -1.08761268  |
| 5,396 | <i>ORF1-FL49</i> | -1.087597989 |

|       |                  |              |
|-------|------------------|--------------|
| 5,397 | <i>SLC22A3</i>   | -1.087533515 |
| 5,398 | <i>IAPP</i>      | -1.087416177 |
| 5,399 | <i>DEPC-1</i>    | -1.087355481 |
| 5,400 | <i>GAR17</i>     | -1.087270863 |
| 5,401 | <i>DNAJC6</i>    | -1.08725694  |
| 5,402 | <i>C14orf145</i> | -1.08711111  |
| 5,403 | <i>PLEKHG4</i>   | -1.087099486 |
| 5,404 | <i>ATP13A4</i>   | -1.086996951 |
| 5,405 | <i>ENTPD1</i>    | -1.086918402 |
| 5,406 | <i>MMS19L</i>    | -1.086809982 |
| 5,407 | <i>RIMS2</i>     | -1.08679309  |
| 5,408 | <i>CAMK2G</i>    | -1.086777176 |
| 5,409 | <i>TCEA1</i>     | -1.086752191 |
| 5,410 | <i>ARSA</i>      | -1.086640413 |
| 5,411 | <i>OPCML</i>     | -1.08660127  |
| 5,412 | <i>LOC155100</i> | -1.086445421 |
| 5,413 | <i>RBM5</i>      | -1.086385753 |
| 5,414 | <i>SYNJ2BP</i>   | -1.086305522 |
| 5,415 | <i>TM4SF18</i>   | -1.086041501 |
| 5,416 | <i>BLM</i>       | -1.08595933  |
| 5,417 | <i>CD33</i>      | -1.085851414 |
| 5,418 | <i>BAT2</i>      | -1.085801847 |
| 5,419 | <i>NAP1L5</i>    | -1.085409383 |
| 5,420 | <i>OR6Y1</i>     | -1.085340695 |
| 5,421 | <i>ACR</i>       | -1.085319456 |
| 5,422 | <i>GBP5</i>      | -1.085200894 |
| 5,423 | <i>ZNF557</i>    | -1.085152976 |
| 5,424 | <i>PRKCDBP</i>   | -1.08500659  |
| 5,425 | <i>FOXD1</i>     | -1.084993115 |
| 5,426 | <i>FLJ90586</i>  | -1.084969654 |
| 5,427 | <i>MADCAM1</i>   | -1.084941244 |
| 5,428 | <i>SCG2</i>      | -1.084887995 |
| 5,429 | <i>CLDN1</i>     | -1.084854157 |
| 5,430 | <i>CD274</i>     | -1.084774052 |
| 5,431 | <i>LOC127540</i> | -1.084715547 |
| 5,432 | <i>LOC392509</i> | -1.084709997 |
| 5,433 | <i>FLJ25449</i>  | -1.084593524 |
| 5,434 | <i>MIG-6</i>     | -1.084429714 |
| 5,435 | <i>FAM18B</i>    | -1.084425888 |
| 5,436 | <i>ACTC</i>      | -1.084208121 |
| 5,437 | <i>WDR40B</i>    | -1.084165409 |
| 5,438 | <i>EFS</i>       | -1.08409987  |
| 5,439 | <i>LOC126731</i> | -1.083896014 |
| 5,440 | <i>GPR141</i>    | -1.08377853  |
| 5,441 | <i>C6ORF166</i>  | -1.083738396 |
| 5,442 | <i>ERBP</i>      | -1.083724818 |
| 5,443 | <i>LOC375035</i> | -1.083659245 |

|       |                     |              |
|-------|---------------------|--------------|
| 5,444 | <i>CDH5</i>         | -1.08365314  |
| 5,445 | <i>WBSCR27</i>      | -1.083633522 |
| 5,446 | <i>ICMT</i>         | -1.083439464 |
| 5,447 | <i>AFAR3</i>        | -1.083414705 |
| 5,448 | <i>ACTR1A</i>       | -1.083224891 |
| 5,449 | <i>C1QTNF4</i>      | -1.083154974 |
| 5,450 | <i>AMT</i>          | -1.083106044 |
| 5,451 | <i>PRSS7</i>        | -1.083102468 |
| 5,452 | <i>HM13</i>         | -1.083080048 |
| 5,453 | <i>RTEL1</i>        | -1.082797382 |
| 5,454 | <i>GARNL3</i>       | -1.082738997 |
| 5,455 | <i>WEE1</i>         | -1.082666222 |
| 5,456 | <i>NOL4</i>         | -1.082551991 |
| 5,457 | <i>AKAP1</i>        | -1.082438964 |
| 5,458 | <i>SPFH1</i>        | -1.08236912  |
| 5,459 | <i>HSPC128</i>      | -1.082184624 |
| 5,460 | <i>CASP6</i>        | -1.08157198  |
| 5,461 | <i>FLJ39421</i>     | -1.081453665 |
| 5,462 | <i>ADAMTS9</i>      | -1.081215478 |
| 5,463 | <i>F8A</i>          | -1.081207492 |
| 5,464 | <i>LOC56964</i>     | -1.081188803 |
| 5,465 | <i>TCF23</i>        | -1.081038603 |
| 5,466 | <i>TRIM10</i>       | -1.081025377 |
| 5,467 | <i>PHF11</i>        | -1.08101647  |
| 5,468 | <i>COLM</i>         | -1.080938759 |
| 5,469 | <i>MPHOSPH10</i>    | -1.080857062 |
| 5,470 | <i>ACCN2</i>        | -1.080726417 |
| 5,471 | <i>ARL2BP</i>       | -1.080669797 |
| 5,472 | <i>FLJ20758</i>     | -1.080512736 |
| 5,473 | <i>KIAA0767</i>     | -1.080073138 |
| 5,474 | <i>HADHB</i>        | -1.080004628 |
| 5,475 | <i>HSD17B12</i>     | -1.079821855 |
| 5,476 | <i>SPON2</i>        | -1.079635297 |
| 5,477 | <i>RP6-166C19.6</i> | -1.079486463 |
| 5,478 | <i>CLCA1</i>        | -1.079134393 |
| 5,479 | <i>LOC201164</i>    | -1.079100241 |
| 5,480 | <i>MGC9712</i>      | -1.079089937 |
| 5,481 | <i>FBXO39</i>       | -1.07851996  |
| 5,482 | <i>EFNA3</i>        | -1.078504709 |
| 5,483 | <i>PTX1</i>         | -1.078322623 |
| 5,484 | <i>C19ORF2</i>      | -1.07823366  |
| 5,485 | <i>KCNA1</i>        | -1.078228795 |
| 5,486 | <i>ATP8B4</i>       | -1.077815906 |
| 5,487 | <i>NEU3</i>         | -1.07767468  |
| 5,488 | <i>LAMC3</i>        | -1.077590114 |
| 5,489 | <i>MGC54289</i>     | -1.077536724 |
| 5,490 | <i>SEC31L1</i>      | -1.077515357 |

|       |                  |              |
|-------|------------------|--------------|
| 5,491 | <i>HRASLS3</i>   | -1.077332571 |
| 5,492 | <i>YY1</i>       | -1.077329453 |
| 5,493 | <i>PDLIM3</i>    | -1.077165465 |
| 5,494 | <i>ZNF439</i>    | -1.077140835 |
| 5,495 | <i>DACH1</i>     | -1.077010351 |
| 5,496 | <i>PLXNC1</i>    | -1.077006515 |
| 5,497 | <i>LOC285513</i> | -1.076978149 |
| 5,498 | <i>MATK</i>      | -1.07695378  |
| 5,499 | <i>C10ORF56</i>  | -1.07694135  |
| 5,500 | <i>PRRX2</i>     | -1.076840123 |
| 5,501 | <i>RTN3</i>      | -1.076534543 |
| 5,502 | <i>PTGER2</i>    | -1.076476838 |
| 5,503 | <i>LYPLAL1</i>   | -1.076120024 |
| 5,504 | <i>MGC34799</i>  | -1.075374936 |
| 5,505 | <i>FLJ40432</i>  | -1.075262897 |
| 5,506 | <i>SS18</i>      | -1.075161306 |
| 5,507 | <i>ASPN</i>      | -1.075090492 |
| 5,508 | <i>LHB</i>       | -1.075073996 |
| 5,509 | <i>SAGE1</i>     | -1.074934536 |
| 5,510 | <i>OTX2</i>      | -1.074899755 |
| 5,511 | <i>LOC51252</i>  | -1.07486501  |
| 5,512 | <i>HIST1H3D</i>  | -1.074788179 |
| 5,513 | <i>PNN</i>       | -1.074725719 |
| 5,514 | <i>HMGN4</i>     | -1.074695802 |
| 5,515 | <i>KLHL1</i>     | -1.074252976 |
| 5,516 | <i>SLITRK1</i>   | -1.074250455 |
| 5,517 | <i>MRGPRX3</i>   | -1.074248312 |
| 5,518 | <i>LOC255798</i> | -1.07420479  |
| 5,519 | <i>MCM7</i>      | -1.074154859 |
| 5,520 | <i>MRPL33</i>    | -1.074077852 |
| 5,521 | <i>FLJ22955</i>  | -1.074067818 |
| 5,522 | <i>BIRC2</i>     | -1.074059045 |
| 5,523 | <i>C9ORF83</i>   | -1.074053799 |
| 5,524 | <i>LPL</i>       | -1.074012416 |
| 5,525 | <i>TAS2R41</i>   | -1.073843578 |
| 5,526 | <i>C6ORF72</i>   | -1.073677025 |
| 5,527 | <i>RQCD1</i>     | -1.073667473 |
| 5,528 | <i>THBS3</i>     | -1.072954059 |
| 5,529 | <i>FLJ12455</i>  | -1.072804083 |
| 5,530 | <i>ELL2</i>      | -1.072719073 |
| 5,531 | <i>CYP27A1</i>   | -1.072702758 |
| 5,532 | <i>NPM3</i>      | -1.072570883 |
| 5,533 | <i>CREB3L2</i>   | -1.072383734 |
| 5,534 | <i>PCDHB9</i>    | -1.072271782 |
| 5,535 | <i>ACADVL</i>    | -1.072200304 |
| 5,536 | <i>TAPBP</i>     | -1.072173633 |
| 5,537 | <i>ARGBP2</i>    | -1.07212887  |

|       |                  |              |
|-------|------------------|--------------|
| 5,538 | <i>CT45-1</i>    | -1.071864023 |
| 5,539 | <i>WNT8A</i>     | -1.071851648 |
| 5,540 | <i>PDE6A</i>     | -1.071664328 |
| 5,541 | <i>KIAA1173</i>  | -1.07147016  |
| 5,542 | <i>DNAPTP6</i>   | -1.071331931 |
| 5,543 | <i>FLJ10330</i>  | -1.071295204 |
| 5,544 | <i>OPRD1</i>     | -1.07127226  |
| 5,545 | <i>IMP-3</i>     | -1.07122035  |
| 5,546 | <i>ART3</i>      | -1.071125771 |
| 5,547 | <i>RAP2C</i>     | -1.071116347 |
| 5,548 | <i>KIAA1797</i>  | -1.07104878  |
| 5,549 | <i>RS1</i>       | -1.070835944 |
| 5,550 | <i>UBE3B</i>     | -1.070728617 |
| 5,551 | <i>OCIA</i>      | -1.070611319 |
| 5,552 | <i>D8S2298E</i>  | -1.070457017 |
| 5,553 | <i>SOX17</i>     | -1.070210416 |
| 5,554 | <i>HOOK1</i>     | -1.069882116 |
| 5,555 | <i>ZZEF1</i>     | -1.069789    |
| 5,556 | <i>EIF2B3</i>    | -1.069571573 |
| 5,557 | <i>AFP</i>       | -1.069337282 |
| 5,558 | <i>MGC5356</i>   | -1.069308959 |
| 5,559 | <i>MAGEL2</i>    | -1.069216121 |
| 5,560 | <i>CST3</i>      | -1.069210306 |
| 5,561 | <i>CHAC2</i>     | -1.068852996 |
| 5,562 | <i>PCTP</i>      | -1.068821742 |
| 5,563 | <i>CCND1</i>     | -1.068798767 |
| 5,564 | <i>CALB2</i>     | -1.068767496 |
| 5,565 | <i>IL11</i>      | -1.068668732 |
| 5,566 | <i>KIAA1838</i>  | -1.06846589  |
| 5,567 | <i>PSAPL1</i>    | -1.0681502   |
| 5,568 | <i>LOC153770</i> | -1.068136622 |
| 5,569 | <i>RBBP9</i>     | -1.067904459 |
| 5,570 | <i>TNRC6</i>     | -1.067887932 |
| 5,571 | <i>NCOA2</i>     | -1.067803893 |
| 5,572 | <i>TLP</i>       | -1.067659106 |
| 5,573 | <i>C1QDC1</i>    | -1.067638002 |
| 5,574 | <i>RANBP10</i>   | -1.067579791 |
| 5,575 | <i>P2RXL1</i>    | -1.067565774 |
| 5,576 | <i>OR52J3</i>    | -1.067515707 |
| 5,577 | <i>ABLIM2</i>    | -1.067497335 |
| 5,578 | <i>METTL1</i>    | -1.067322159 |
| 5,579 | <i>UEVLD</i>     | -1.067310148 |
| 5,580 | <i>WNT6</i>      | -1.067260253 |
| 5,581 | <i>LOC255783</i> | -1.067123491 |
| 5,582 | <i>IL1F5</i>     | -1.067022603 |
| 5,583 | <i>LGALS1</i>    | -1.06694057  |
| 5,584 | <i>CLC</i>       | -1.066925688 |

|       |                     |              |
|-------|---------------------|--------------|
| 5,585 | <i>HCN1</i>         | -1.066803687 |
| 5,586 | <i>CD24</i>         | -1.066645527 |
| 5,587 | <i>CABIN1</i>       | -1.066617128 |
| 5,588 | <i>FBLP-1</i>       | -1.066386319 |
| 5,589 | <i>IDH1</i>         | -1.065903439 |
| 5,590 | <i>C21ORF33</i>     | -1.06585137  |
| 5,591 | <i>C9ORF117</i>     | -1.065636121 |
| 5,592 | <i>CPLX4</i>        | -1.065482829 |
| 5,593 | <i>MTCH2</i>        | -1.065418659 |
| 5,594 | <i>MGC9564</i>      | -1.065303774 |
| 5,595 | <i>MCLC</i>         | -1.065234812 |
| 5,596 | <i>LOC390927</i>    | -1.065070142 |
| 5,597 | <i>ADNP</i>         | -1.064961147 |
| 5,598 | <i>CENTB2</i>       | -1.064616202 |
| 5,599 | <i>DKFZP761B107</i> | -1.064384314 |
| 5,600 | <i>IL21</i>         | -1.06432736  |
| 5,601 | <i>ROBO1</i>        | -1.064285903 |
| 5,602 | <i>MGC35138</i>     | -1.064144655 |
| 5,603 | <i>RPL27A</i>       | -1.064135051 |
| 5,604 | <i>OR5AK2</i>       | -1.064085522 |
| 5,605 | <i>FERD3L</i>       | -1.064019499 |
| 5,606 | <i>MGC42174</i>     | -1.063905488 |
| 5,607 | <i>ZNF607</i>       | -1.063867343 |
| 5,608 | <i>SAMD8</i>        | -1.063620789 |
| 5,609 | <i>DPF3</i>         | -1.063588068 |
| 5,610 | <i>FLJ11331</i>     | -1.063528085 |
| 5,611 | <i>RP6-166C19.3</i> | -1.063389033 |
| 5,612 | <i>CUTL1</i>        | -1.063379217 |
| 5,613 | <i>CRYBB1</i>       | -1.063267138 |
| 5,614 | <i>CHCHD1</i>       | -1.063106528 |
| 5,615 | <i>NRBP</i>         | -1.062673658 |
| 5,616 | <i>ZNF174</i>       | -1.062399507 |
| 5,617 | <i>LOC115704</i>    | -1.062161595 |
| 5,618 | <i>MBTPS2</i>       | -1.062058483 |
| 5,619 | <i>BIN3</i>         | -1.061966853 |
| 5,620 | <i>BIN3</i>         | -1.061966853 |
| 5,621 | <i>VRK1</i>         | -1.06180294  |
| 5,622 | <i>CRYAB</i>        | -1.061754611 |
| 5,623 | <i>SUI1</i>         | -1.061695167 |
| 5,624 | <i>KIFC3</i>        | -1.061580536 |
| 5,625 | <i>BCAS1</i>        | -1.061562215 |
| 5,626 | <i>GNPNAT1</i>      | -1.061477308 |
| 5,627 | <i>HUMGT198A</i>    | -1.061327914 |
| 5,628 | <i>PILRA</i>        | -1.061320872 |
| 5,629 | <i>ATP5B</i>        | -1.061285617 |
| 5,630 | <i>FLJ14146</i>     | -1.061223595 |
| 5,631 | <i>FAM29A</i>       | -1.061184436 |



|       |                      |              |
|-------|----------------------|--------------|
| 5,632 | <i>FXC1</i>          | -1.061055257 |
| 5,633 | <i>EFNB1</i>         | -1.061039165 |
| 5,634 | <i>KRTAP4-5</i>      | -1.060549017 |
| 5,635 | <i>FLJ20071</i>      | -1.060512092 |
| 5,636 | <i>KIAA0090</i>      | -1.060336544 |
| 5,637 | <i>DKFZP434G156</i>  | -1.060129491 |
| 5,638 | <i>SUHW4</i>         | -1.059965878 |
| 5,639 | <i>NALP6</i>         | -1.059835556 |
| 5,640 | <i>H326</i>          | -1.059796905 |
| 5,641 | <i>KIAA0663</i>      | -1.059616461 |
| 5,642 | <i>FLJ13072</i>      | -1.059568304 |
| 5,643 | <i>HPRP8BP</i>       | -1.059141707 |
| 5,644 | <i>LTK</i>           | -1.059000205 |
| 5,645 | <i>GANAB</i>         | -1.058951524 |
| 5,646 | <i>TBXA2R</i>        | -1.058709388 |
| 5,647 | <i>FLJ45422</i>      | -1.058663073 |
| 5,648 | <i>CEACAM6</i>       | -1.0583737   |
| 5,649 | <i>FLJ11016</i>      | -1.058362548 |
| 5,650 | <i>GSDM</i>          | -1.058242848 |
| 5,651 | <i>HKR1</i>          | -1.05814604  |
| 5,652 | <i>CD24</i>          | -1.058072004 |
| 5,653 | <i>ZNF225</i>        | -1.058044345 |
| 5,654 | <i>SRPK2</i>         | -1.057904556 |
| 5,655 | <i>FGF16</i>         | -1.057828468 |
| 5,656 | <i>SIGLEC11</i>      | -1.057772569 |
| 5,657 | <i>SNPH</i>          | -1.057412856 |
| 5,658 | <i>MGC26818</i>      | -1.057144911 |
| 5,659 | <i>RAB17</i>         | -1.057065209 |
| 5,660 | <i>LOC388389</i>     | -1.056966543 |
| 5,661 | <i>MYBPC3</i>        | -1.056546217 |
| 5,662 | <i>MDM1</i>          | -1.056505664 |
| 5,663 | <i>MSH3</i>          | -1.056415712 |
| 5,664 | <i>DHRS2</i>         | -1.056231207 |
| 5,665 | <i>XEDAR</i>         | -1.056138241 |
| 5,666 | <i>GAL3ST4</i>       | -1.056125243 |
| 5,667 | <i>RAB4B</i>         | -1.056121685 |
| 5,668 | <i>LATS1</i>         | -1.055994877 |
| 5,669 | <i>GABRA1</i>        | -1.055970183 |
| 5,670 | <i>LRP1B</i>         | -1.055962092 |
| 5,671 | <i>C6ORF114</i>      | -1.055647748 |
| 5,672 | <i>LOC92017</i>      | -1.055561699 |
| 5,673 | <i>RBP2</i>          | -1.055417043 |
| 5,674 | <i>HEBP1</i>         | -1.05525978  |
| 5,675 | <i>DKFZP434G0625</i> | -1.055256075 |
| 5,676 | <i>NR1I3</i>         | -1.055138414 |
| 5,677 | <i>MGC47816</i>      | -1.055094094 |
| 5,678 | <i>COL24A1</i>       | -1.054901046 |

|       |                  |              |
|-------|------------------|--------------|
| 5,679 | <i>MGC29816</i>  | -1.054831747 |
| 5,680 | <i>MYO1E</i>     | -1.05475726  |
| 5,681 | <i>WRNIP1</i>    | -1.054709182 |
| 5,682 | <i>CARM1</i>     | -1.054690843 |
| 5,683 | <i>C20ORF185</i> | -1.054678441 |
| 5,684 | <i>FLJ12443</i>  | -1.054462689 |
| 5,685 | <i>ME1</i>       | -1.054429293 |
| 5,686 | <i>GRIK1</i>     | -1.054425605 |
| 5,687 | <i>BCMP11</i>    | -1.054337776 |
| 5,688 | <i>INSIG2</i>    | -1.054098222 |
| 5,689 | <i>LOC345079</i> | -1.05383698  |
| 5,690 | <i>MELK</i>      | -1.053624666 |
| 5,691 | <i>LOC51066</i>  | -1.053462201 |
| 5,692 | <i>IPF1</i>      | -1.053382368 |
| 5,693 | <i>FLJ20534</i>  | -1.053334473 |
| 5,694 | <i>FOXF2</i>     | -1.053165874 |
| 5,695 | <i>HBLD1</i>     | -1.052808995 |
| 5,696 | <i>RHBDL2</i>    | -1.052727226 |
| 5,697 | <i>C20ORF178</i> | -1.052129763 |
| 5,698 | <i>ZDHH11</i>    | -1.051970462 |
| 5,699 | <i>ASMTL</i>     | -1.051764519 |
| 5,700 | <i>FLJ20013</i>  | -1.051588916 |
| 5,701 | <i>SLC25A20</i>  | -1.05133959  |
| 5,702 | <i>LOC642219</i> | -1.051314265 |
| 5,703 | <i>ACTR2</i>     | -1.051283082 |
| 5,704 | <i>ACTR2</i>     | -1.051283082 |
| 5,705 | <i>SLC9A3R2</i>  | -1.051069802 |
| 5,706 | <i>SCRN3</i>     | -1.050974836 |
| 5,707 | <i>FLJ32926</i>  | -1.050907791 |
| 5,708 | <i>DECR2</i>     | -1.050843486 |
| 5,709 | <i>CD86</i>      | -1.050756039 |
| 5,710 | <i>FOXC1</i>     | -1.050508008 |
| 5,711 | <i>FLJ35867</i>  | -1.050495729 |
| 5,712 | <i>PPIL6</i>     | -1.050384937 |
| 5,713 | <i>GCL</i>       | -1.050298492 |
| 5,714 | <i>CTSD</i>      | -1.050229688 |
| 5,715 | <i>ANKRD28</i>   | -1.050027198 |
| 5,716 | <i>PIR</i>       | -1.049907978 |
| 5,717 | <i>USP37</i>     | -1.049827864 |
| 5,718 | <i>TARSL1</i>    | -1.049822354 |
| 5,719 | <i>MAN2A2</i>    | -1.049607267 |
| 5,720 | <i>CRY1</i>      | -1.049389034 |
| 5,721 | <i>FLJ37562</i>  | -1.049103624 |
| 5,722 | <i>DCC</i>       | -1.049032966 |
| 5,723 | <i>PSMD5</i>     | -1.048801991 |
| 5,724 | <i>ZNF584</i>    | -1.048739059 |
| 5,725 | <i>CAGLP</i>     | -1.048541236 |

|       |                  |              |
|-------|------------------|--------------|
| 5,726 | <i>SUMO1</i>     | -1.048437485 |
| 5,727 | <i>ATBF1</i>     | -1.048410639 |
| 5,728 | <i>LOC81569</i>  | -1.04837435  |
| 5,729 | <i>FLJ23451</i>  | -1.04828394  |
| 5,730 | <i>CSPG3</i>     | -1.048249274 |
| 5,731 | <i>ZBED3</i>     | -1.048139444 |
| 5,732 | <i>HA-1</i>      | -1.048034237 |
| 5,733 | <i>FLJ16139</i>  | -1.047765515 |
| 5,734 | <i>KIAA1789</i>  | -1.047596335 |
| 5,735 | <i>EIF5A</i>     | -1.047356192 |
| 5,736 | <i>C10ORF46</i>  | -1.047237126 |
| 5,737 | <i>FLJ90579</i>  | -1.047139863 |
| 5,738 | <i>LEREPO4</i>   | -1.047026799 |
| 5,739 | <i>DMP1</i>      | -1.046956703 |
| 5,740 | <i>SPINK5L3</i>  | -1.04683453  |
| 5,741 | <i>ZNF366</i>    | -1.046420021 |
| 5,742 | <i>USP47</i>     | -1.046300465 |
| 5,743 | <i>C14ORF111</i> | -1.046237704 |
| 5,744 | <i>C11ORF17</i>  | -1.04568577  |
| 5,745 | <i>SCGB2A1</i>   | -1.045637773 |
| 5,746 | <i>PLXNB1</i>    | -1.045501806 |
| 5,747 | <i>BRUNOL4</i>   | -1.045411924 |
| 5,748 | <i>FLJ20273</i>  | -1.04538593  |
| 5,749 | <i>B4GALT4</i>   | -1.045376817 |
| 5,750 | <i>MSI2</i>      | -1.044931004 |
| 5,751 | <i>IL1R1</i>     | -1.044918885 |
| 5,752 | <i>LOC55971</i>  | -1.044905721 |
| 5,753 | <i>TMIE</i>      | -1.044593124 |
| 5,754 | <i>IL12RB1</i>   | -1.044533327 |
| 5,755 | <i>VMD2L2</i>    | -1.04448205  |
| 5,756 | <i>DCP1B</i>     | -1.044081044 |
| 5,757 | <i>C19ORF18</i>  | -1.043862351 |
| 5,758 | <i>FLJ12770</i>  | -1.043792421 |
| 5,759 | <i>MGC50372</i>  | -1.043781403 |
| 5,760 | <i>OR52E4</i>    | -1.043714535 |
| 5,761 | <i>FLJ23049</i>  | -1.043646746 |
| 5,762 | <i>FREM2</i>     | -1.043628626 |
| 5,763 | <i>LOC80298</i>  | -1.043391073 |
| 5,764 | <i>PGK1</i>      | -1.043365169 |
| 5,765 | <i>HIST1H2AA</i> | -1.04306121  |
| 5,766 | <i>ZNF570</i>    | -1.042997165 |
| 5,767 | <i>FLJ25770</i>  | -1.04282568  |
| 5,768 | <i>DKK1</i>      | -1.042557569 |
| 5,769 | <i>TRIM68</i>    | -1.042121432 |
| 5,770 | <i>LOC90580</i>  | -1.04197943  |
| 5,771 | <i>NFX1</i>      | -1.041751272 |
| 5,772 | <i>LRP2</i>      | -1.041745397 |

|       |                  |              |
|-------|------------------|--------------|
| 5,773 | <i>CALR3</i>     | -1.041642158 |
| 5,774 | <i>MEP1B</i>     | -1.041026694 |
| 5,775 | <i>TSPAN12</i>   | -1.040896084 |
| 5,776 | <i>ZC3HDC6</i>   | -1.040833998 |
| 5,777 | <i>GPR113</i>    | -1.040780192 |
| 5,778 | <i>LOC340267</i> | -1.040752764 |
| 5,779 | <i>KIAA0196</i>  | -1.04072385  |
| 5,780 | <i>ADAR</i>      | -1.040552882 |
| 5,781 | <i>KIAA1919</i>  | -1.040506351 |
| 5,782 | <i>SLC22A1</i>   | -1.040215144 |
| 5,783 | <i>VAV2</i>      | -1.040048591 |
| 5,784 | <i>PLD3</i>      | -1.040017632 |
| 5,785 | <i>LOC284323</i> | -1.039259987 |
| 5,786 | <i>RNASE2</i>    | -1.039170313 |
| 5,787 | <i>APP</i>       | -1.038954212 |
| 5,788 | <i>XRCC5</i>     | -1.038649497 |
| 5,789 | <i>PABPC3</i>    | -1.038468037 |
| 5,790 | <i>ALS2CR4</i>   | -1.038272889 |
| 5,791 | <i>PQBP1</i>     | -1.038270358 |
| 5,792 | <i>NCOR2</i>     | -1.038203721 |
| 5,793 | <i>NDST1</i>     | -1.037873528 |
| 5,794 | <i>UBTF</i>      | -1.037747947 |
| 5,795 | <i>KAT3</i>      | -1.037714248 |
| 5,796 | <i>FLJ40919</i>  | -1.03760895  |
| 5,797 | <i>DIRAS2</i>    | -1.037378813 |
| 5,798 | <i>GJB2</i>      | -1.036796109 |
| 5,799 | <i>ARHI</i>      | -1.036796109 |
| 5,800 | <i>PSG9</i>      | -1.036740496 |
| 5,801 | <i>LOC340120</i> | -1.03668036  |
| 5,802 | <i>NYD-SP14</i>  | -1.036622595 |
| 5,803 | <i>LOC644943</i> | -1.036505887 |
| 5,804 | <i>ADK</i>       | -1.036460847 |
| 5,805 | <i>GCH1</i>      | -1.036353487 |
| 5,806 | <i>TRIM64</i>    | -1.035898359 |
| 5,807 | <i>SLU7</i>      | -1.035720574 |
| 5,808 | <i>AKAP7</i>     | -1.03571578  |
| 5,809 | <i>B4GALT7</i>   | -1.035610341 |
| 5,810 | <i>OR2V2</i>     | -1.035602236 |
| 5,811 | <i>DHRS7</i>     | -1.035458507 |
| 5,812 | <i>FLJ12438</i>  | -1.03541395  |
| 5,813 | <i>SCARF2</i>    | -1.035282511 |
| 5,814 | <i>ZNF217</i>    | -1.035025782 |
| 5,815 | <i>DPPA4</i>     | -1.034929952 |
| 5,816 | <i>SPAG11A</i>   | -1.034776405 |
| 5,817 | <i>C20ORF77</i>  | -1.034732585 |
| 5,818 | <i>DHODH</i>     | -1.034660788 |
| 5,819 | <i>BCL11B</i>    | -1.034494832 |

|       |                      |              |
|-------|----------------------|--------------|
| 5,820 | <i>FLJ11126</i>      | -1.034244851 |
| 5,821 | <i>DKFZP547E1010</i> | -1.03379051  |
| 5,822 | <i>C14ORF31</i>      | -1.03372076  |
| 5,823 | <i>DSPG3</i>         | -1.033290047 |
| 5,824 | <i>ANKS1</i>         | -1.033172045 |
| 5,825 | <i>KIAA0478</i>      | -1.033136962 |
| 5,826 | <i>CCNE1</i>         | -1.033067927 |
| 5,827 | <i>NAALADL2</i>      | -1.032998536 |
| 5,828 | <i>LRRN1</i>         | -1.032881239 |
| 5,829 | <i>KATNB1</i>        | -1.032725818 |
| 5,830 | <i>SMARCE1</i>       | -1.032640235 |
| 5,831 | <i>SNRPD1</i>        | -1.032312943 |
| 5,832 | <i>LOC283989</i>     | -1.03214173  |
| 5,833 | <i>BDKRB2</i>        | -1.031929055 |
| 5,834 | <i>LOC92345</i>      | -1.031837237 |
| 5,835 | <i>C10ORF76</i>      | -1.031623195 |
| 5,836 | <i>LOC162073</i>     | -1.031578979 |
| 5,837 | <i>LOC90637</i>      | -1.031461988 |
| 5,838 | <i>CTSH</i>          | -1.03142758  |
| 5,839 | <i>C17orf41</i>      | -1.031415031 |
| 5,840 | <i>TRNT1</i>         | -1.031382637 |
| 5,841 | <i>ZNF263</i>        | -1.0312014   |
| 5,842 | <i>C22ORF8</i>       | -1.031087173 |
| 5,843 | <i>ISG20L2</i>       | -1.030932982 |
| 5,844 | <i>LNX2</i>          | -1.030594337 |
| 5,845 | <i>TIC</i>           | -1.030345849 |
| 5,846 | <i>CBLN2</i>         | -1.030310132 |
| 5,847 | <i>LTBP4</i>         | -1.030221305 |
| 5,848 | <i>NEK1</i>          | -1.030131261 |
| 5,849 | <i>ATG10</i>         | -1.029929864 |
| 5,850 | <i>TIMM17B</i>       | -1.029671036 |
| 5,851 | <i>TAFA4</i>         | -1.029225694 |
| 5,852 | <i>PTN</i>           | -1.029143306 |
| 5,853 | <i>RNF150</i>        | -1.028822736 |
| 5,854 | <i>ID4</i>           | -1.028770954 |
| 5,855 | <i>FLJ25059</i>      | -1.028749122 |
| 5,856 | <i>FGFR2</i>         | -1.028411892 |
| 5,857 | <i>LOC123872</i>     | -1.028310852 |
| 5,858 | <i>LGI4</i>          | -1.027900023 |
| 5,859 | <i>IL1RAPL2</i>      | -1.02771126  |
| 5,860 | <i>NUP43</i>         | -1.027384083 |
| 5,861 | <i>NFAM1</i>         | -1.027322258 |
| 5,862 | <i>AQP6</i>          | -1.027302273 |
| 5,863 | <i>CNGA1</i>         | -1.027219476 |
| 5,864 | <i>VPS8</i>          | -1.027151936 |
| 5,865 | <i>APOC4</i>         | -1.027080402 |
| 5,866 | <i>TAF15</i>         | -1.026981088 |

|       |                  |              |
|-------|------------------|--------------|
| 5,867 | <i>SLC35E1</i>   | -1.026779279 |
| 5,868 | <i>FLJ39963</i>  | -1.026619101 |
| 5,869 | <i>FLJ12056</i>  | -1.026522036 |
| 5,870 | <i>C12ORF14</i>  | -1.026378141 |
| 5,871 | <i>FLJ14525</i>  | -1.026345192 |
| 5,872 | <i>KIAA1117</i>  | -1.025991953 |
| 5,873 | <i>TBC1D3G</i>   | -1.025974054 |
| 5,874 | <i>BRDG1</i>     | -1.025767153 |
| 5,875 | <i>B3GAT2</i>    | -1.025295148 |
| 5,876 | <i>CHRNA10</i>   | -1.025291126 |
| 5,877 | <i>TP53INP1</i>  | -1.025076489 |
| 5,878 | <i>IKBKAP</i>    | -1.02505908  |
| 5,879 | <i>PSMD13</i>    | -1.025042722 |
| 5,880 | <i>HSPA5BP1</i>  | -1.02503391  |
| 5,881 | <i>SNX15</i>     | -1.024615451 |
| 5,882 | <i>DTNBP1</i>    | -1.024553654 |
| 5,883 | <i>ALK</i>       | -1.024446931 |
| 5,884 | <i>SAT</i>       | -1.024284256 |
| 5,885 | <i>ANKFY1</i>    | -1.024153708 |
| 5,886 | <i>C10ORF111</i> | -1.024037319 |
| 5,887 | <i>DAO</i>       | -1.023804952 |
| 5,888 | <i>FLJ40160</i>  | -1.023803563 |
| 5,889 | <i>MGC2747</i>   | -1.02377058  |
| 5,890 | <i>CGI-90</i>    | -1.023733444 |
| 5,891 | <i>PHYHD1</i>    | -1.023280503 |
| 5,892 | <i>ZNF275</i>    | -1.023263371 |
| 5,893 | <i>LANCL1</i>    | -1.023170675 |
| 5,894 | <i>NYD-SP20</i>  | -1.02306881  |
| 5,895 | <i>ARMC6</i>     | -1.022991988 |
| 5,896 | <i>ZNF90</i>     | -1.022948824 |
| 5,897 | <i>LIPA</i>      | -1.022898646 |
| 5,898 | <i>BCKDHA</i>    | -1.022739413 |
| 5,899 | <i>IGBP1</i>     | -1.022654968 |
| 5,900 | <i>TESSP2</i>    | -1.022625818 |
| 5,901 | <i>DUSP16</i>    | -1.022545326 |
| 5,902 | <i>DMPK</i>      | -1.022365948 |
| 5,903 | <i>TSARG6</i>    | -1.0223654   |
| 5,904 | <i>C14ORF166</i> | -1.02197953  |
| 5,905 | <i>MGC5528</i>   | -1.021908743 |
| 5,906 | <i>GYLTL1B</i>   | -1.021876644 |
| 5,907 | <i>ACBD3</i>     | -1.021843245 |
| 5,908 | <i>GAGED3</i>    | -1.021458063 |
| 5,909 | <i>ARHGAP19</i>  | -1.021425369 |
| 5,910 | <i>RPL3L</i>     | -1.021415128 |
| 5,911 | <i>KIAA1510</i>  | -1.02125177  |
| 5,912 | <i>SEC10L1</i>   | -1.021013517 |
| 5,913 | <i>L3MBTL2</i>   | -1.020801397 |

|       |                  |              |
|-------|------------------|--------------|
| 5,914 | <i>ACSL3</i>     | -1.020551508 |
| 5,915 | <i>FLJ46247</i>  | -1.020437708 |
| 5,916 | <i>HIST1H1A</i>  | -1.020255606 |
| 5,917 | <i>ANAPC4</i>    | -1.020193016 |
| 5,918 | <i>HSPC065</i>   | -1.02014572  |
| 5,919 | <i>PP784</i>     | -1.019943437 |
| 5,920 | <i>SYT9</i>      | -1.019699257 |
| 5,921 | <i>C14ORF21</i>  | -1.019385754 |
| 5,922 | <i>SH2BP1</i>    | -1.019153571 |
| 5,923 | <i>LOC255798</i> | -1.019129128 |
| 5,924 | <i>OR1J4</i>     | -1.019071025 |
| 5,925 | <i>SFRS16</i>    | -1.019014865 |
| 5,926 | <i>SLC6A1</i>    | -1.018954878 |
| 5,927 | <i>PHEX</i>      | -1.018919812 |
| 5,928 | <i>FMR2</i>      | -1.018889366 |
| 5,929 | <i>PIGT</i>      | -1.018720702 |
| 5,930 | <i>RCOR3</i>     | -1.018565358 |
| 5,931 | <i>LIN10</i>     | -1.018401826 |
| 5,932 | <i>ANKMY2</i>    | -1.018078055 |
| 5,933 | <i>DMD</i>       | -1.017809442 |
| 5,934 | <i>SMPDL3A</i>   | -1.017546364 |
| 5,935 | <i>C21ORF66</i>  | -1.017537458 |
| 5,936 | <i>PMAIP1</i>    | -1.017434354 |
| 5,937 | <i>SPRED2</i>    | -1.017373351 |
| 5,938 | <i>N4BP1</i>     | -1.017234742 |
| 5,939 | <i>NOC4</i>      | -1.017225194 |
| 5,940 | <i>KRT19</i>     | -1.017216265 |
| 5,941 | <i>PAQR6</i>     | -1.017117183 |
| 5,942 | <i>FLJ40235</i>  | -1.016742848 |
| 5,943 | <i>C1QTNF5</i>   | -1.016630268 |
| 5,944 | <i>MRPS2</i>     | -1.01660017  |
| 5,945 | <i>KCNK16</i>    | -1.016574429 |
| 5,946 | <i>SDC4</i>      | -1.016471394 |
| 5,947 | <i>PWWP2</i>     | -1.016282957 |
| 5,948 | <i>FLJ34633</i>  | -1.015973866 |
| 5,949 | <i>HB-1</i>      | -1.01594659  |
| 5,950 | <i>AGTPBP1</i>   | -1.015369714 |
| 5,951 | <i>CTRL</i>      | -1.015270978 |
| 5,952 | <i>C10ORF11</i>  | -1.015244572 |
| 5,953 | <i>C9ORF13</i>   | -1.015234902 |
| 5,954 | <i>FLJ13273</i>  | -1.015218684 |
| 5,955 | <i>PTP4A1</i>    | -1.014988323 |
| 5,956 | <i>ZBTB39</i>    | -1.014549046 |
| 5,957 | <i>TXNL5</i>     | -1.014519706 |
| 5,958 | <i>SCRT1</i>     | -1.014372341 |
| 5,959 | <i>C14ORF46</i>  | -1.014293188 |
| 5,960 | <i>LECT1</i>     | -1.013948592 |

|       |                      |              |
|-------|----------------------|--------------|
| 5,961 | <i>ILKAP</i>         | -1.013825267 |
| 5,962 | <i>FLJ22349</i>      | -1.013657532 |
| 5,963 | <i>HCNGP</i>         | -1.013364677 |
| 5,964 | <i>WFDC13</i>        | -1.013363216 |
| 5,965 | <i>SDBCAG84</i>      | -1.013269154 |
| 5,966 | <i>LCE6A</i>         | -1.013219348 |
| 5,967 | <i>KIAA1001</i>      | -1.013174485 |
| 5,968 | <i>LTBP4</i>         | -1.013103826 |
| 5,969 | <i>KIAA0251</i>      | -1.013056071 |
| 5,970 | <i>CYP4A22</i>       | -1.013048867 |
| 5,971 | <i>MAP4K5</i>        | -1.012969349 |
| 5,972 | <i>DKFZP434C131</i>  | -1.012919169 |
| 5,973 | <i>DGKI</i>          | -1.012855525 |
| 5,974 | <i>MLZE</i>          | -1.012700929 |
| 5,975 | <i>MC3R</i>          | -1.012616333 |
| 5,976 | <i>ARMC2</i>         | -1.012414199 |
| 5,977 | <i>SLC27A3</i>       | -1.012401784 |
| 5,978 | <i>GMPPB</i>         | -1.01236037  |
| 5,979 | <i>FIGNL1</i>        | -1.0122573   |
| 5,980 | <i>PD2</i>           | -1.012208134 |
| 5,981 | <i>DKFZP762C2414</i> | -1.012151893 |
| 5,982 | <i>MGC4399</i>       | -1.012041213 |
| 5,983 | <i>NUDT9</i>         | -1.01203925  |
| 5,984 | <i>ITGB3BP</i>       | -1.012031695 |
| 5,985 | <i>MGC20781</i>      | -1.011632423 |
| 5,986 | <i>NALP7</i>         | -1.011604285 |
| 5,987 | <i>RAB5B</i>         | -1.011450042 |
| 5,988 | <i>MGC15407</i>      | -1.011331145 |
| 5,989 | <i>SLC4A10</i>       | -1.011310407 |
| 5,990 | <i>TYR</i>           | -1.011085655 |
| 5,991 | <i>GNRH1</i>         | -1.010834689 |
| 5,992 | <i>GDI2</i>          | -1.010800378 |
| 5,993 | <i>MGC10946</i>      | -1.010658551 |
| 5,994 | <i>LTF</i>           | -1.010530586 |
| 5,995 | <i>NDUFC2</i>        | -1.01033681  |
| 5,996 | <i>ROPN1B</i>        | -1.009989101 |
| 5,997 | <i>GALNT6</i>        | -1.009891224 |
| 5,998 | <i>NDRG2</i>         | -1.00981094  |
| 5,999 | <i>NTHL1</i>         | -1.009536361 |
| 6,000 | <i>C1ORF38</i>       | -1.009107077 |
| 6,001 | <i>MYST2</i>         | -1.008922801 |
| 6,002 | <i>FGFR3</i>         | -1.008834815 |
| 6,003 | <i>MBD6</i>          | -1.008778582 |
| 6,004 | <i>ERN1</i>          | -1.008600354 |
| 6,005 | <i>IL17</i>          | -1.008563962 |
| 6,006 | <i>GPR114</i>        | -1.008256675 |
| 6,007 | <i>RIOK1</i>         | -1.008045526 |



|       |                      |              |
|-------|----------------------|--------------|
| 6,008 | <i>PHF15</i>         | -1.008024351 |
| 6,009 | <i>CDKN2A</i>        | -1.007999143 |
| 6,010 | <i>MGC40178</i>      | -1.007992298 |
| 6,011 | <i>MGC2650</i>       | -1.007854487 |
| 6,012 | <i>PIPPIN</i>        | -1.007777961 |
| 6,013 | <i>HCFC1</i>         | -1.00763806  |
| 6,014 | <i>FLJ10349</i>      | -1.007146217 |
| 6,015 | <i>C6ORF111</i>      | -1.007102775 |
| 6,016 | <i>EFNA5</i>         | -1.0070011   |
| 6,017 | <i>EIF4EBP3</i>      | -1.006891921 |
| 6,018 | <i>OXGR1</i>         | -1.006867375 |
| 6,019 | <i>CPA2</i>          | -1.006832669 |
| 6,020 | <i>FLJ23311</i>      | -1.00675201  |
| 6,021 | <i>BECN1</i>         | -1.006551994 |
| 6,022 | <i>NINJ2</i>         | -1.00643025  |
| 6,023 | <i>MMAA</i>          | -1.006302758 |
| 6,024 | <i>BVES</i>          | -1.006296801 |
| 6,025 | <i>LOC339448</i>     | -1.006005631 |
| 6,026 | <i>FLJ23471</i>      | -1.005983307 |
| 6,027 | <i>MYH11</i>         | -1.00596871  |
| 6,028 | <i>IGF2</i>          | -1.005832942 |
| 6,029 | <i>FLJ37078</i>      | -1.005831261 |
| 6,030 | <i>SNHG3-RCC1</i>    | -1.005823004 |
| 6,031 | <i>SGPL1</i>         | -1.005804636 |
| 6,032 | <i>MEOX1</i>         | -1.005730505 |
| 6,033 | <i>FBXL8</i>         | -1.005730181 |
| 6,034 | <i>KIAA0882</i>      | -1.005690955 |
| 6,035 | <i>SEC3L1</i>        | -1.0056866   |
| 6,036 | <i>C16ORF33</i>      | -1.005663216 |
| 6,037 | <i>PEX19</i>         | -1.005386105 |
| 6,038 | <i>SUV420H1</i>      | -1.005323334 |
| 6,039 | <i>MARCH5</i>        | -1.005319266 |
| 6,040 | <i>S100A7</i>        | -1.005006016 |
| 6,041 | <i>TBP</i>           | -1.004787015 |
| 6,042 | <i>NNAT</i>          | -1.004335525 |
| 6,043 | <i>DKFZP586D0919</i> | -1.003952386 |
| 6,044 | <i>PTCHD1</i>        | -1.003885138 |
| 6,045 | <i>KLHDC5</i>        | -1.003867934 |
| 6,046 | <i>IFI16</i>         | -1.003815126 |
| 6,047 | <i>HMG3</i>          | -1.003616611 |
| 6,048 | <i>FLJ43093</i>      | -1.003520528 |
| 6,049 | <i>CARHSP1</i>       | -1.003487242 |
| 6,050 | <i>TMEM31</i>        | -1.003365591 |
| 6,051 | <i>RIN2</i>          | -1.003240799 |
| 6,052 | <i>HOXC5</i>         | -1.003176667 |
| 6,053 | <i>GDNF</i>          | -1.003089546 |
| 6,054 | <i>JUN</i>           | -1.00308423  |

|       |                      |              |
|-------|----------------------|--------------|
| 6,055 | <i>PRPSAP1</i>       | -1.002992547 |
| 6,056 | <i>FLJ40321</i>      | -1.002945398 |
| 6,057 | <i>Raptor</i>        | -1.002935959 |
| 6,058 | <i>PFN4</i>          | -1.002653015 |
| 6,059 | <i>SLCO1B3</i>       | -1.002301545 |
| 6,060 | <i>MYO1F</i>         | -1.002181205 |
| 6,061 | <i>DKFZP434O0527</i> | -1.002073445 |
| 6,062 | <i>LRRC18</i>        | -1.001905231 |
| 6,063 | <i>CYP27B1</i>       | -1.001796763 |
| 6,064 | <i>C9ORF46</i>       | -1.001771333 |
| 6,065 | <i>RKHD1</i>         | -1.001649493 |
| 6,066 | <i>RECQL4</i>        | -1.001538078 |
| 6,067 | <i>CRKL</i>          | -1.001450154 |
| 6,068 | <i>GALNT4</i>        | -1.001443562 |
| 6,069 | <i>BAT5</i>          | -1.001067798 |
| 6,070 | <i>RBM18</i>         | -1.000925555 |
| 6,071 | <i>LOC126298</i>     | -1.000797318 |
| 6,072 | <i>GPR52</i>         | -1.000539243 |
| 6,073 | <i>TLR6</i>          | -1.000522877 |
| 6,074 | <i>KRT1B</i>         | -1.000508161 |
| 6,075 | <i>FLI1</i>          | -1.000417418 |
| 6,076 | <i>TXNDC2</i>        | -1.000246446 |
| 6,077 | <i>CORO2B</i>        | -1.000163372 |
| 6,078 | <i>TUSC3</i>         | -1.000092816 |
| 6,079 | <i>PCNXL2</i>        | -1.000074233 |
| 6,080 | <i>OSBPL5</i>        | -0.999789753 |
| 6,081 | <i>ADAMTS18</i>      | -0.999488893 |
| 6,082 | <i>STX6</i>          | -0.999341233 |
| 6,083 | <i>CPLX2</i>         | -0.99923929  |
| 6,084 | <i>MRGPRD</i>        | -0.999087843 |
| 6,085 | <i>DDT</i>           | -0.998943222 |
| 6,086 | <i>PMFBP1</i>        | -0.998932603 |
| 6,087 | <i>PMFBP1</i>        | -0.998932603 |
| 6,088 | <i>ACAT2</i>         | -0.998759342 |
| 6,089 | <i>LIN7A</i>         | -0.998751609 |
| 6,090 | <i>BMP15</i>         | -0.998727595 |
| 6,091 | <i>KIAA0701</i>      | -0.998504958 |
| 6,092 | <i>RASSF2</i>        | -0.998377522 |
| 6,093 | <i>DLNB14</i>        | -0.99813085  |
| 6,094 | <i>TPM4</i>          | -0.997917861 |
| 6,095 | <i>SRP54</i>         | -0.997847498 |
| 6,096 | <i>TDRKH</i>         | -0.997335528 |
| 6,097 | <i>NUCB2</i>         | -0.997182734 |
| 6,098 | <i>C10orf130</i>     | -0.997088919 |
| 6,099 | <i>DEFB4</i>         | -0.997011541 |
| 6,100 | <i>OR8B2</i>         | -0.996888625 |
| 6,101 | <i>DHX32</i>         | -0.996861699 |

|       |          |              |
|-------|----------|--------------|
| 6,102 | TEX15    | -0.996232682 |
| 6,103 | VRK3     | -0.996190882 |
| 6,104 | ARHGAP6  | -0.996030954 |
| 6,105 | ABCA9    | -0.99599016  |
| 6,106 | ZNF322B  | -0.995968244 |
| 6,107 | C7orf6   | -0.995889428 |
| 6,108 | FLJ14803 | -0.995872028 |
| 6,109 | SACS     | -0.995761774 |
| 6,110 | CAMK4    | -0.995633273 |
| 6,111 | CAPS2    | -0.995436679 |
| 6,112 | LIG3     | -0.99536085  |
| 6,113 | RPL10    | -0.995232214 |
| 6,114 | UNC13A   | -0.99504676  |
| 6,115 | YY2      | -0.995012101 |
| 6,116 | OPLAH    | -0.9949164   |
| 6,117 | NAGA     | -0.994769656 |
| 6,118 | LOC51136 | -0.994764262 |
| 6,119 | HNRNPA3  | -0.994523782 |
| 6,120 | VMD2L3   | -0.994453612 |
| 6,121 | MGC51025 | -0.994069781 |
| 6,122 | MGC4266  | -0.994065771 |
| 6,123 | STAT6    | -0.993990952 |
| 6,124 | PCDH10   | -0.993965504 |
| 6,125 | CEBPA    | -0.993933172 |
| 6,126 | MAP3K1   | -0.993797919 |
| 6,127 | ANK3     | -0.993700158 |
| 6,128 | CGI-30   | -0.993612034 |
| 6,129 | FLJ38482 | -0.993555944 |
| 6,130 | KIAA1441 | -0.993548132 |
| 6,131 | DEFB105  | -0.993476162 |
| 6,132 | MAB21L2  | -0.993473602 |
| 6,133 | FLJ44815 | -0.993438886 |
| 6,134 | MORF4    | -0.993373137 |
| 6,135 | SIAT7D   | -0.993359454 |
| 6,136 | AK3L2    | -0.993294706 |
| 6,137 | FBXO22   | -0.993060614 |
| 6,138 | ADPRH    | -0.993027114 |
| 6,139 | CSF2RB   | -0.992886913 |
| 6,140 | SKD3     | -0.992815593 |
| 6,141 | SLC24A4  | -0.992421769 |
| 6,142 | RGS10    | -0.992288085 |
| 6,143 | MARCH2   | -0.992252223 |
| 6,144 | PANK1    | -0.992162593 |
| 6,145 | KA36     | -0.992111925 |
| 6,146 | LYK5     | -0.991934246 |
| 6,147 | TXNDC8   | -0.991874519 |
| 6,148 | RBX1     | -0.991768464 |

|       |                    |              |
|-------|--------------------|--------------|
| 6,149 | <i>PDE4C</i>       | -0.991446468 |
| 6,150 | <i>LPGAT1</i>      | -0.991227833 |
| 6,151 | <i>TXN2</i>        | -0.990875561 |
| 6,152 | <i>ZIM2</i>        | -0.990588184 |
| 6,153 | <i>DBH</i>         | -0.990504374 |
| 6,154 | <i>MGC34647</i>    | -0.990326726 |
| 6,155 | <i>IGFBP2</i>      | -0.990171465 |
| 6,156 | <i>HIST2H4</i>     | -0.990033434 |
| 6,157 | <i>PCDHGA7</i>     | -0.989927138 |
| 6,158 | <i>KIAA1024</i>    | -0.989895069 |
| 6,159 | <i>ITPKB</i>       | -0.989778688 |
| 6,160 | <i>C6ORF165</i>    | -0.989679945 |
| 6,161 | <i>ALDH5A1</i>     | -0.989512251 |
| 6,162 | <i>FLJ12953</i>    | -0.989226819 |
| 6,163 | <i>ADAM20</i>      | -0.989122449 |
| 6,164 | <i>TRPM4</i>       | -0.988876096 |
| 6,165 | <i>CYP4F2</i>      | -0.988585162 |
| 6,166 | <i>BTBD5</i>       | -0.988545725 |
| 6,167 | <i>ITGA10</i>      | -0.988408702 |
| 6,168 | <i>CLDN14</i>      | -0.988335616 |
| 6,169 | <i>ZFYVE28</i>     | -0.9882274   |
| 6,170 | <i>LHX3</i>        | -0.988177947 |
| 6,171 | <i>PHLDA1</i>      | -0.988117797 |
| 6,172 | <i>TMPRSS11B</i>   | -0.988040976 |
| 6,173 | <i>MAFB</i>        | -0.98799241  |
| 6,174 | <i>FTO</i>         | -0.987859888 |
| 6,175 | <i>LSM2</i>        | -0.987696625 |
| 6,176 | <i>KIAA1909</i>    | -0.987528266 |
| 6,177 | <i>GCC2</i>        | -0.987510127 |
| 6,178 | <i>MYOZ2</i>       | -0.987242366 |
| 6,179 | <i>RALP</i>        | -0.986888779 |
| 6,180 | <i>CCL2</i>        | -0.986785052 |
| 6,181 | <i>WHSC1</i>       | -0.986434187 |
| 6,182 | <i>KCNAB3</i>      | -0.986134296 |
| 6,183 | <i>KIAA0605</i>    | -0.986115281 |
| 6,184 | <i>RP11-11C5.2</i> | -0.98605953  |
| 6,185 | <i>LOC554251</i>   | -0.986059012 |
| 6,186 | <i>ZNF532</i>      | -0.986044074 |
| 6,187 | <i>CPN1</i>        | -0.986029016 |
| 6,188 | <i>APOBEC3C</i>    | -0.9859716   |
| 6,189 | <i>NEUROD1</i>     | -0.985883118 |
| 6,190 | <i>DMWD</i>        | -0.985844983 |
| 6,191 | <i>DMWD</i>        | -0.985844983 |
| 6,192 | <i>LOC90639</i>    | -0.985693282 |
| 6,193 | <i>FOLR1</i>       | -0.985465892 |
| 6,194 | <i>GAS2L1</i>      | -0.985198917 |
| 6,195 | <i>MVD</i>         | -0.984962589 |

|       |           |              |
|-------|-----------|--------------|
| 6,196 | WWP1      | -0.984774504 |
| 6,197 | CAM-KIIN  | -0.984697109 |
| 6,198 | PITPN     | -0.984536581 |
| 6,199 | LOC161823 | -0.984457796 |
| 6,200 | SF1       | -0.984318436 |
| 6,201 | PAIP1     | -0.983991091 |
| 6,202 | RIMS1     | -0.983911931 |
| 6,203 | GABARAPL1 | -0.983837293 |
| 6,204 | CLN2      | -0.983762847 |
| 6,205 | HRASLS2   | -0.98375252  |
| 6,206 | OR6C3     | -0.983706775 |
| 6,207 | ASB8      | -0.983391735 |
| 6,208 | LOC119710 | -0.983187755 |
| 6,209 | SHKBP1    | -0.9830889   |
| 6,210 | FETUB     | -0.983069137 |
| 6,211 | TYMS      | -0.98301774  |
| 6,212 | C1orf45   | -0.982988619 |
| 6,213 | ACTB      | -0.98295814  |
| 6,214 | FABP1     | -0.98269963  |
| 6,215 | ESPN      | -0.982696244 |
| 6,216 | FSTL1     | -0.982645215 |
| 6,217 | LOC401565 | -0.98263826  |
| 6,218 | PLEK2     | -0.982550469 |
| 6,219 | OR2A7     | -0.982424936 |
| 6,220 | MGC41945  | -0.982133946 |
| 6,221 | ELYS      | -0.981929729 |
| 6,222 | PKN3      | -0.98187108  |
| 6,223 | TSPY1     | -0.981866794 |
| 6,224 | ITGA8     | -0.981796753 |
| 6,225 | LOC150678 | -0.981718089 |
| 6,226 | HSPB8     | -0.98168496  |
| 6,227 | OR2T35    | -0.981643793 |
| 6,228 | HDAC5     | -0.981563714 |
| 6,229 | JAK2      | -0.981514364 |
| 6,230 | GGCX      | -0.981237855 |
| 6,231 | NEUROG2   | -0.98090851  |
| 6,232 | GLUD2     | -0.980190196 |
| 6,233 | FLJ10375  | -0.979510803 |
| 6,234 | FLJ37357  | -0.979220071 |
| 6,235 | SESN2     | -0.978914716 |
| 6,236 | C6ORF31   | -0.978865706 |
| 6,237 | GDF3      | -0.978380394 |
| 6,238 | JMJD3     | -0.978373817 |
| 6,239 | SBLF      | -0.978218084 |
| 6,240 | THADA     | -0.977944456 |
| 6,241 | FOXP1     | -0.977935493 |
| 6,242 | C4ORF9    | -0.977892275 |

|       |                      |              |
|-------|----------------------|--------------|
| 6,243 | <i>FLJ31659</i>      | -0.977865931 |
| 6,244 | <i>KIAA1377</i>      | -0.977771157 |
| 6,245 | <i>BIRC5</i>         | -0.97775222  |
| 6,246 | <i>FFAR1</i>         | -0.977576026 |
| 6,247 | <i>IL22RA1</i>       | -0.977545703 |
| 6,248 | <i>SYT5</i>          | -0.977492665 |
| 6,249 | <i>TPM3</i>          | -0.977490824 |
| 6,250 | <i>SELK</i>          | -0.977351988 |
| 6,251 | <i>LOC255313</i>     | -0.976805299 |
| 6,252 | <i>CILP</i>          | -0.976782939 |
| 6,253 | <i>RNASE9</i>        | -0.976716843 |
| 6,254 | <i>NEURL</i>         | -0.976561079 |
| 6,255 | <i>RUFY1</i>         | -0.97646041  |
| 6,256 | <i>LOC388407</i>     | -0.976446216 |
| 6,257 | <i>MFAP1</i>         | -0.976436158 |
| 6,258 | <i>C12ORF5</i>       | -0.975887122 |
| 6,259 | <i>FLJ11017</i>      | -0.975464627 |
| 6,260 | <i>LOC200933</i>     | -0.975389904 |
| 6,261 | <i>MGAM</i>          | -0.975202713 |
| 6,262 | <i>LOC90624</i>      | -0.975124175 |
| 6,263 | <i>RNPEP</i>         | -0.975047829 |
| 6,264 | <i>KIAA1447</i>      | -0.974993993 |
| 6,265 | <i>KIAA1946</i>      | -0.974977445 |
| 6,266 | <i>FLJ35696</i>      | -0.974799915 |
| 6,267 | <i>HYDIN</i>         | -0.97471214  |
| 6,268 | <i>PINX1</i>         | -0.974643428 |
| 6,269 | <i>DYRK2</i>         | -0.974537193 |
| 6,270 | <i>OGDH</i>          | -0.97448461  |
| 6,271 | <i>NFKBIE</i>        | -0.974426326 |
| 6,272 | <i>ZNF317</i>        | -0.974289263 |
| 6,273 | <i>RABL5</i>         | -0.97405816  |
| 6,274 | <i>SPIN</i>          | -0.974054445 |
| 6,275 | <i>DBT</i>           | -0.973968426 |
| 6,276 | <i>DKFZP762C1112</i> | -0.97393     |
| 6,277 | <i>GTF2IRD2B</i>     | -0.973899822 |
| 6,278 | <i>SCML2</i>         | -0.973645369 |
| 6,279 | <i>CGI-119</i>       | -0.973473341 |
| 6,280 | <i>APOF</i>          | -0.973293497 |
| 6,281 | <i>KIAA0101</i>      | -0.972609876 |
| 6,282 | <i>FBXW12</i>        | -0.972557213 |
| 6,283 | <i>FCHSD1</i>        | -0.971949101 |
| 6,284 | <i>DKFZP761I2123</i> | -0.971888871 |
| 6,285 | <i>DOCK7</i>         | -0.971519174 |
| 6,286 | <i>MRPL30</i>        | -0.971230272 |
| 6,287 | <i>EMR3</i>          | -0.971206531 |
| 6,288 | <i>DJ12208.2</i>     | -0.971055997 |
| 6,289 | <i>POMT1</i>         | -0.971016821 |

|       |                  |              |
|-------|------------------|--------------|
| 6,290 | <i>RAPGEF4</i>   | -0.970628152 |
| 6,291 | <i>ZNFN1A3</i>   | -0.970601768 |
| 6,292 | <i>DSIPI</i>     | -0.970579717 |
| 6,293 | <i>TMEM20</i>    | -0.970515983 |
| 6,294 | <i>MGC10334</i>  | -0.970393061 |
| 6,295 | <i>IL1RL2</i>    | -0.970088041 |
| 6,296 | <i>FLJ38792</i>  | -0.969986205 |
| 6,297 | <i>DEFB103B</i>  | -0.969943114 |
| 6,298 | <i>RNF190</i>    | -0.969895155 |
| 6,299 | <i>OR5J2</i>     | -0.969800742 |
| 6,300 | <i>MGC4251</i>   | -0.969757413 |
| 6,301 | <i>GJA4</i>      | -0.969625027 |
| 6,302 | <i>PHF21B</i>    | -0.969456463 |
| 6,303 | <i>OLIG1</i>     | -0.969368552 |
| 6,304 | <i>BTN2A2</i>    | -0.969363865 |
| 6,305 | <i>NFYA</i>      | -0.969324354 |
| 6,306 | <i>INSL4</i>     | -0.969322914 |
| 6,307 | <i>HSPA5</i>     | -0.969262406 |
| 6,308 | <i>OR4M1</i>     | -0.96916659  |
| 6,309 | <i>KCNIP4</i>    | -0.969137566 |
| 6,310 | <i>OR2J2</i>     | -0.969112134 |
| 6,311 | <i>CHST9</i>     | -0.969033022 |
| 6,312 | <i>C17ORF38</i>  | -0.968964629 |
| 6,313 | <i>FLJ21159</i>  | -0.968957241 |
| 6,314 | <i>SUPV3L1</i>   | -0.968912977 |
| 6,315 | <i>DUSP14</i>    | -0.968875759 |
| 6,316 | <i>LYZL4</i>     | -0.968551458 |
| 6,317 | <i>YWHAE</i>     | -0.968216002 |
| 6,318 | <i>TNNI3K</i>    | -0.968186394 |
| 6,319 | <i>IPO4</i>      | -0.968096375 |
| 6,320 | <i>LOC201175</i> | -0.967945496 |
| 6,321 | <i>HTN1</i>      | -0.967854942 |
| 6,322 | <i>KIF27</i>     | -0.967556582 |
| 6,323 | <i>VIPR2</i>     | -0.967529561 |
| 6,324 | <i>OPRL1</i>     | -0.967529561 |
| 6,325 | <i>SNX5</i>      | -0.967333219 |
| 6,326 | <i>MGC19764</i>  | -0.967316351 |
| 6,327 | <i>NIFIE14</i>   | -0.9673069   |
| 6,328 | <i>COMMD7</i>    | -0.967223666 |
| 6,329 | <i>SENP1</i>     | -0.966932289 |
| 6,330 | <i>F25965</i>    | -0.96690198  |
| 6,331 | <i>EYA1</i>      | -0.966881554 |
| 6,332 | <i>TBCA</i>      | -0.966802537 |
| 6,333 | <i>KCNH3</i>     | -0.966433911 |
| 6,334 | <i>FZD3</i>      | -0.966394023 |
| 6,335 | <i>RNF152</i>    | -0.966269034 |
| 6,336 | <i>EDG3</i>      | -0.966127519 |

|       |                      |              |
|-------|----------------------|--------------|
| 6,337 | <i>PPIL2</i>         | -0.965894981 |
| 6,338 | <i>TREM2</i>         | -0.965859231 |
| 6,339 | <i>FLJ20729</i>      | -0.965694909 |
| 6,340 | <i>SLC38A6</i>       | -0.96564203  |
| 6,341 | <i>MYLK2</i>         | -0.965621203 |
| 6,342 | <i>FLJ39873</i>      | -0.965620455 |
| 6,343 | <i>SEMA4B</i>        | -0.965584699 |
| 6,344 | <i>SMC6L1</i>        | -0.965558115 |
| 6,345 | <i>LOC134548</i>     | -0.965494665 |
| 6,346 | <i>AP3B2</i>         | -0.9654586   |
| 6,347 | <i>FBXL15</i>        | -0.965387614 |
| 6,348 | <i>FBXW5</i>         | -0.965325334 |
| 6,349 | <i>LOC343637</i>     | -0.96531661  |
| 6,350 | <i>C20ORF129</i>     | -0.964887308 |
| 6,351 | <i>MGC17791</i>      | -0.964803773 |
| 6,352 | <i>PSFL</i>          | -0.964777161 |
| 6,353 | <i>AMPD1</i>         | -0.964655224 |
| 6,354 | <i>C19ORF23</i>      | -0.964513158 |
| 6,355 | <i>AKAP9</i>         | -0.964232747 |
| 6,356 | <i>CGI-07</i>        | -0.964035354 |
| 6,357 | <i>RP11-493K23.2</i> | -0.963831363 |
| 6,358 | <i>HIST1H3I</i>      | -0.963765713 |
| 6,359 | <i>SNX25</i>         | -0.963688913 |
| 6,360 | <i>ARFRP2</i>        | -0.963616485 |
| 6,361 | <i>FLJ45645</i>      | -0.963612908 |
| 6,362 | <i>WASF3</i>         | -0.963588689 |
| 6,363 | <i>AASDHPPT</i>      | -0.963453978 |
| 6,364 | <i>SH2D1A</i>        | -0.963412921 |
| 6,365 | <i>PODXL2</i>        | -0.963395013 |
| 6,366 | <i>MAGED1</i>        | -0.963238016 |
| 6,367 | <i>CRLF2</i>         | -0.963080314 |
| 6,368 | <i>FLJ30213</i>      | -0.963046489 |
| 6,369 | <i>FLJ12541</i>      | -0.962690569 |
| 6,370 | <i>PP3111</i>        | -0.961981386 |
| 6,371 | <i>PLEKHB2</i>       | -0.961965222 |
| 6,372 | <i>PSME4</i>         | -0.961710419 |
| 6,373 | <i>ETHE1</i>         | -0.961710419 |
| 6,374 | <i>MAPK8</i>         | -0.961655852 |
| 6,375 | <i>LOC115294</i>     | -0.961493395 |
| 6,376 | <i>SDHD</i>          | -0.961365518 |
| 6,377 | <i>GRB10</i>         | -0.961261007 |
| 6,378 | <i>PDHA1</i>         | -0.961038349 |
| 6,379 | <i>UCP1</i>          | -0.961002267 |
| 6,380 | <i>CHST4</i>         | -0.960899151 |
| 6,381 | <i>CAPZA2</i>        | -0.960456428 |
| 6,382 | <i>PMS2</i>          | -0.960397803 |
| 6,383 | <i>CCNA2</i>         | -0.960308516 |



|       |                  |              |
|-------|------------------|--------------|
| 6,384 | <i>SPATA1</i>    | -0.960265557 |
| 6,385 | <i>ZNF500</i>    | -0.960259174 |
| 6,386 | <i>ADRBK2</i>    | -0.960196351 |
| 6,387 | <i>TDE2L</i>     | -0.960046045 |
| 6,388 | <i>LOC134147</i> | -0.960011964 |
| 6,389 | <i>TCERG1</i>    | -0.95952117  |
| 6,390 | <i>C20ORF38</i>  | -0.959486985 |
| 6,391 | <i>HOXA1</i>     | -0.959479574 |
| 6,392 | <i>KCNC1</i>     | -0.959477129 |
| 6,393 | <i>GOLT1B</i>    | -0.959363251 |
| 6,394 | <i>CNR2</i>      | -0.959316806 |
| 6,395 | <i>KLRC4</i>     | -0.959258953 |
| 6,396 | <i>MAGEH1</i>    | -0.959063032 |
| 6,397 | <i>TST</i>       | -0.958992734 |
| 6,398 | <i>OR2A4</i>     | -0.958696095 |
| 6,399 | <i>EPHA7</i>     | -0.9583955   |
| 6,400 | <i>PDCD7</i>     | -0.958257368 |
| 6,401 | <i>CDKL1</i>     | -0.958232074 |
| 6,402 | <i>FLJ10496</i>  | -0.957765235 |
| 6,403 | <i>HIF3A</i>     | -0.957730578 |
| 6,404 | <i>HPSE</i>      | -0.957667945 |
| 6,405 | <i>MGC44294</i>  | -0.957593987 |
| 6,406 | <i>IFRD2</i>     | -0.957555778 |
| 6,407 | <i>C14ORF32</i>  | -0.957489305 |
| 6,408 | <i>FLJ13154</i>  | -0.957411375 |
| 6,409 | <i>BAG5</i>      | -0.957207593 |
| 6,410 | <i>FLJ25791</i>  | -0.956721837 |
| 6,411 | <i>THSD2</i>     | -0.956557165 |
| 6,412 | <i>INPP4B</i>    | -0.956375478 |
| 6,413 | <i>TMEM50B</i>   | -0.956323341 |
| 6,414 | <i>ZBTB4</i>     | -0.956244041 |
| 6,415 | <i>PRPS2</i>     | -0.956228335 |
| 6,416 | <i>UBE1C</i>     | -0.956209902 |
| 6,417 | <i>DGKA</i>      | -0.955876136 |
| 6,418 | <i>GMFG</i>      | -0.95584056  |
| 6,419 | <i>SPCS1</i>     | -0.955800989 |
| 6,420 | <i>RREB1</i>     | -0.955674469 |
| 6,421 | <i>ZNF383</i>    | -0.955404756 |
| 6,422 | <i>ZNF258</i>    | -0.955307146 |
| 6,423 | <i>RNF138</i>    | -0.955147197 |
| 6,424 | <i>MDM4</i>      | -0.954947776 |
| 6,425 | <i>LRRC5</i>     | -0.954884271 |
| 6,426 | <i>FAM3C</i>     | -0.954862047 |
| 6,427 | <i>FAM3C</i>     | -0.954862047 |
| 6,428 | <i>MESDC2</i>    | -0.954684107 |
| 6,429 | <i>RAB3IP</i>    | -0.954571974 |
| 6,430 | <i>HMGCS1</i>    | -0.954384334 |

|       |                       |              |
|-------|-----------------------|--------------|
| 6,431 | <i>CXORF22</i>        | -0.954375315 |
| 6,432 | <i>SAMHD1</i>         | -0.953822954 |
| 6,433 | <i>PRKAR1A</i>        | -0.953653168 |
| 6,434 | <i>GRIM19</i>         | -0.953482445 |
| 6,435 | <i>FLJ25530</i>       | -0.953366042 |
| 6,436 | <i>VAMP1</i>          | -0.95315224  |
| 6,437 | <i>FLJ36090</i>       | -0.95281538  |
| 6,438 | <i>LRRC24</i>         | -0.952807613 |
| 6,439 | <i>DUSP19</i>         | -0.952794813 |
| 6,440 | <i>DNASE1</i>         | -0.952750561 |
| 6,441 | <i>MARCH8</i>         | -0.95256309  |
| 6,442 | <i>M11S1</i>          | -0.952322482 |
| 6,443 | <i>DOCK2</i>          | -0.952274354 |
| 6,444 | <i>ATF4</i>           | -0.952263876 |
| 6,445 | <i>FLJ23263</i>       | -0.952186831 |
| 6,446 | <i>MYOHD1</i>         | -0.952088535 |
| 6,447 | <i>OR1F1</i>          | -0.951768787 |
| 6,448 | <i>C19ORF6</i>        | -0.951619007 |
| 6,449 | <i>GAB2</i>           | -0.951532683 |
| 6,450 | <i>FLJ14871</i>       | -0.951504433 |
| 6,451 | <i>SOCS4</i>          | -0.951490436 |
| 6,452 | <i>HP</i>             | -0.951306963 |
| 6,453 | <i>FLJ10374</i>       | -0.951303557 |
| 6,454 | <i>ARL4D</i>          | -0.951038533 |
| 6,455 | <i>ADAMTS12</i>       | -0.950983469 |
| 6,456 | <i>CENTB1</i>         | -0.950709814 |
| 6,457 | <i>ZNF530</i>         | -0.950677319 |
| 6,458 | <i>TMOD2</i>          | -0.950267416 |
| 6,459 | <i>TSPAN18</i>        | -0.950245891 |
| 6,460 | <i>SR140</i>          | -0.950178238 |
| 6,461 | <i>SIGLEC7</i>        | -0.950136848 |
| 6,462 | <i>RXFP3</i>          | -0.950116423 |
| 6,463 | <i>DLG1</i>           | -0.950076964 |
| 6,464 | <i>FLJ22746</i>       | -0.950016563 |
| 6,465 | <i>FLJ20457</i>       | -0.949837409 |
| 6,466 | <i>FMO3</i>           | -0.949793251 |
| 6,467 | <i>FARP1</i>          | -0.949740097 |
| 6,468 | <i>DOC-1R</i>         | -0.949513286 |
| 6,469 | <i>DPYD</i>           | -0.949146933 |
| 6,470 | <i>KIF11</i>          | -0.94906445  |
| 6,471 | <i>TRAG3</i>          | -0.949030272 |
| 6,472 | <i>LOC126147</i>      | -0.949004714 |
| 6,473 | <i>ETFA</i>           | -0.948945548 |
| 6,474 | <i>SIX3</i>           | -0.948831489 |
| 6,475 | <i>OR4Q3</i>          | -0.948673645 |
| 6,476 | <i>DKFZP686A01247</i> | -0.948643369 |
| 6,477 | <i>LOC51236</i>       | -0.948470794 |

|       |                     |              |
|-------|---------------------|--------------|
| 6,478 | <i>TLE1</i>         | -0.948269162 |
| 6,479 | <i>GLRA4</i>        | -0.948245684 |
| 6,480 | <i>IGFBP6</i>       | -0.947762724 |
| 6,481 | <i>DNAH9</i>        | -0.947689719 |
| 6,482 | <i>HSPA1A</i>       | -0.947643807 |
| 6,483 | <i>SYNCOILIN</i>    | -0.947481198 |
| 6,484 | <i>FSTL4</i>        | -0.947399934 |
| 6,485 | <i>LOC112476</i>    | -0.947291893 |
| 6,486 | <i>STEAP</i>        | -0.947053776 |
| 6,487 | <i>PLA2G6</i>       | -0.946933249 |
| 6,488 | <i>FLJ36335</i>     | -0.946343495 |
| 6,489 | <i>LOC133619</i>    | -0.94618364  |
| 6,490 | <i>FLJ23467</i>     | -0.945995975 |
| 6,491 | <i>LOC388284</i>    | -0.945981632 |
| 6,492 | <i>UNC93A</i>       | -0.945790632 |
| 6,493 | <i>NUSAP1</i>       | -0.945747113 |
| 6,494 | <i>SLC27A2</i>      | -0.945735762 |
| 6,495 | <i>UNC50</i>        | -0.945674106 |
| 6,496 | <i>OR8D1</i>        | -0.945579257 |
| 6,497 | <i>DKFZP547E052</i> | -0.945447379 |
| 6,498 | <i>ZNF582</i>       | -0.945387774 |
| 6,499 | <i>GGTLA1</i>       | -0.945387562 |
| 6,500 | <i>TMEFF2</i>       | -0.945309172 |
| 6,501 | <i>RAPGEFL1</i>     | -0.945293909 |
| 6,502 | <i>RBM23</i>        | -0.945264737 |
| 6,503 | <i>RAB9B</i>        | -0.945185052 |
| 6,504 | <i>OR2T10</i>       | -0.945070075 |
| 6,505 | <i>FAM48B1</i>      | -0.944889919 |
| 6,506 | <i>MMP24</i>        | -0.94454991  |
| 6,507 | <i>HMGCLL1</i>      | -0.944513618 |
| 6,508 | <i>GJB4</i>         | -0.944513618 |
| 6,509 | <i>ZNF232</i>       | -0.94427601  |
| 6,510 | <i>NEDD4L</i>       | -0.94424526  |
| 6,511 | <i>CABP1</i>        | -0.944162648 |
| 6,512 | <i>LOC340654</i>    | -0.943936547 |
| 6,513 | <i>SUFU</i>         | -0.943914733 |
| 6,514 | <i>FLJ25471</i>     | -0.94377027  |
| 6,515 | <i>IQGAP1</i>       | -0.943682154 |
| 6,516 | <i>FLJ21347</i>     | -0.943302437 |
| 6,517 | <i>MGC50372</i>     | -0.943254375 |
| 6,518 | <i>LOC388125</i>    | -0.943248607 |
| 6,519 | <i>PDE6B</i>        | -0.943198058 |
| 6,520 | <i>C21ORF25</i>     | -0.942998709 |
| 6,521 | <i>PRKACB</i>       | -0.942982923 |
| 6,522 | <i>AKTIP</i>        | -0.942963334 |
| 6,523 | <i>CAST</i>         | -0.942897333 |
| 6,524 | <i>FGFR1OP</i>      | -0.942842804 |

|       |                      |              |
|-------|----------------------|--------------|
| 6,525 | <i>FGFR10P</i>       | -0.942842804 |
| 6,526 | <i>SMAP</i>          | -0.942802891 |
| 6,527 | <i>MRPS33</i>        | -0.942728049 |
| 6,528 | <i>ACOT6</i>         | -0.942547068 |
| 6,529 | <i>HAT1</i>          | -0.942504074 |
| 6,530 | <i>UBQLN2</i>        | -0.942255139 |
| 6,531 | <i>GPR107</i>        | -0.942048395 |
| 6,532 | <i>OR6C75</i>        | -0.942000408 |
| 6,533 | <i>KIAA0082</i>      | -0.941885283 |
| 6,534 | <i>NEK6</i>          | -0.941884895 |
| 6,535 | <i>BCL2L10</i>       | -0.941752357 |
| 6,536 | <i>HTR2C</i>         | -0.941395538 |
| 6,537 | <i>POLE</i>          | -0.941290121 |
| 6,538 | <i>LOC196346</i>     | -0.941266765 |
| 6,539 | <i>C15ORF17</i>      | -0.941247143 |
| 6,540 | <i>LOC144100</i>     | -0.941187043 |
| 6,541 | <i>RIC-8</i>         | -0.941075395 |
| 6,542 | <i>C9ORF64</i>       | -0.940850632 |
| 6,543 | <i>CNAP1</i>         | -0.940679332 |
| 6,544 | <i>LCE1C</i>         | -0.940654639 |
| 6,545 | <i>BTBD7</i>         | -0.940605792 |
| 6,546 | <i>DKFZP434H0115</i> | -0.94042298  |
| 6,547 | <i>GCN1L1</i>        | -0.940421965 |
| 6,548 | <i>CIC</i>           | -0.940388283 |
| 6,549 | <i>ACCN4</i>         | -0.940220572 |
| 6,550 | <i>RABEP2</i>        | -0.94014256  |
| 6,551 | <i>CYP39A1</i>       | -0.939954749 |
| 6,552 | <i>MEFV</i>          | -0.939818463 |
| 6,553 | <i>CYBASC3</i>       | -0.939705842 |
| 6,554 | <i>GDF15</i>         | -0.939637344 |
| 6,555 | <i>S100Z</i>         | -0.939564653 |
| 6,556 | <i>KIAA1387</i>      | -0.939182164 |
| 6,557 | <i>ANGPTL5</i>       | -0.939122999 |
| 6,558 | <i>SYN1</i>          | -0.939042898 |
| 6,559 | <i>HSD17B2</i>       | -0.938784392 |
| 6,560 | <i>CASP4</i>         | -0.938777449 |
| 6,561 | <i>DNER</i>          | -0.938265783 |
| 6,562 | <i>GSDML</i>         | -0.938206563 |
| 6,563 | <i>LOC441061</i>     | -0.938095806 |
| 6,564 | <i>GULP1</i>         | -0.938033005 |
| 6,565 | <i>OR51M1</i>        | -0.9380251   |
| 6,566 | <i>EPHB1</i>         | -0.938013619 |
| 6,567 | <i>PCBP1</i>         | -0.937587344 |
| 6,568 | <i>SUV39H1</i>       | -0.937426034 |
| 6,569 | <i>PTEN</i>          | -0.937390814 |
| 6,570 | <i>CD63</i>          | -0.937370372 |
| 6,571 | <i>TNNI2</i>         | -0.937144436 |

|       |           |              |
|-------|-----------|--------------|
| 6,572 | MAPRE1    | -0.937129422 |
| 6,573 | CIP29     | -0.937110407 |
| 6,574 | FLJ25393  | -0.936992549 |
| 6,575 | ALG10     | -0.936973015 |
| 6,576 | LCA10     | -0.93694759  |
| 6,577 | CRYBA2    | -0.93689031  |
| 6,578 | TRIM15    | -0.936842354 |
| 6,579 | SYCP3     | -0.936771203 |
| 6,580 | KCNK1     | -0.936693702 |
| 6,581 | OR5T2     | -0.936663726 |
| 6,582 | CCNT1     | -0.936588855 |
| 6,583 | MAPK14    | -0.936506655 |
| 6,584 | CEAL1     | -0.93622907  |
| 6,585 | ING5      | -0.936219647 |
| 6,586 | FLJ10094  | -0.936152386 |
| 6,587 | SSA2      | -0.936120509 |
| 6,588 | UBQLN3    | -0.935950007 |
| 6,589 | DPF2      | -0.935856025 |
| 6,590 | MGC16664  | -0.935837833 |
| 6,591 | NMT2      | -0.935746269 |
| 6,592 | ZNF407    | -0.935673463 |
| 6,593 | NDUFB6    | -0.935612287 |
| 6,594 | MRPL12    | -0.935600893 |
| 6,595 | ABCG8     | -0.935560849 |
| 6,596 | LOC340595 | -0.935271164 |
| 6,597 | KRTAP20-1 | -0.93520112  |
| 6,598 | GSTO1     | -0.934973667 |
| 6,599 | SORBS1    | -0.934855542 |
| 6,600 | KIF26A    | -0.934575264 |
| 6,601 | UBE2R2    | -0.934417162 |
| 6,602 | SGPP2     | -0.934324013 |
| 6,603 | ZNF334    | -0.934009561 |
| 6,604 | SLC25A15  | -0.933974398 |
| 6,605 | TTC12     | -0.933892704 |
| 6,606 | SLC38A2   | -0.933845654 |
| 6,607 | C6ORF199  | -0.933522612 |
| 6,608 | TRAM1L1   | -0.933373031 |
| 6,609 | SCO2      | -0.933300481 |
| 6,610 | RNF130    | -0.93329883  |
| 6,611 | UNQ5782   | -0.933266358 |
| 6,612 | C3ORF1    | -0.93318047  |
| 6,613 | OR10G9    | -0.932954874 |
| 6,614 | NAPA      | -0.93285505  |
| 6,615 | ANKRD11   | -0.932619492 |
| 6,616 | ANK1      | -0.932219231 |
| 6,617 | MGC29891  | -0.932177833 |
| 6,618 | PCBD      | -0.932083718 |

|       |                  |              |
|-------|------------------|--------------|
| 6,619 | AMD1             | -0.932038012 |
| 6,620 | DPYSL4           | -0.931933225 |
| 6,621 | LRTM2            | -0.931844873 |
| 6,622 | PCDHA13          | -0.931723654 |
| 6,623 | KIF18A           | -0.931667299 |
| 6,624 | GSTA4            | -0.931665772 |
| 6,625 | OR2T29           | -0.931570691 |
| 6,626 | CDH10            | -0.931222685 |
| 6,627 | RNF148           | -0.931143436 |
| 6,628 | CD164L1          | -0.930936431 |
| 6,629 | TP53INP2         | -0.930912737 |
| 6,630 | TIGD5            | -0.930800999 |
| 6,631 | C7ORF33          | -0.930086011 |
| 6,632 | DJ383J4.3        | -0.930028305 |
| 6,633 | DKFZP586B1621    | -0.929971781 |
| 6,634 | SLC17A5          | -0.929870916 |
| 6,635 | SH3TC2           | -0.929822124 |
| 6,636 | SLC5A5           | -0.929688006 |
| 6,637 | HEAB             | -0.929505759 |
| 6,638 | FLJ13491         | -0.929440116 |
| 6,639 | SDCBP2           | -0.929435314 |
| 6,640 | LOC342897        | -0.929379373 |
| 6,641 | LLOXNC01-237H1.1 | -0.929379373 |
| 6,642 | INPP4A           | -0.929369963 |
| 6,643 | AIF1             | -0.929330067 |
| 6,644 | PCDHA6           | -0.929135524 |
| 6,645 | NT5C1A           | -0.928806687 |
| 6,646 | KIFC2            | -0.928670459 |
| 6,647 | FLJ12476         | -0.928379266 |
| 6,648 | EIF2AK3          | -0.928348386 |
| 6,649 | VPS41            | -0.928253825 |
| 6,650 | C9ORF18          | -0.928227636 |
| 6,651 | ATRX             | -0.928099559 |
| 6,652 | PTPRS            | -0.927990641 |
| 6,653 | SLC25A17         | -0.927873458 |
| 6,654 | PSTPIP1          | -0.927821697 |
| 6,655 | TSHB             | -0.927434381 |
| 6,656 | MGC34680         | -0.927328393 |
| 6,657 | MOSPD2           | -0.927292105 |
| 6,658 | SHCBP1           | -0.927173004 |
| 6,659 | YLPM1            | -0.927128498 |
| 6,660 | C4BPB            | -0.926943278 |
| 6,661 | FLJ13119         | -0.92688752  |
| 6,662 | CAMKK1           | -0.92668116  |
| 6,663 | FBF1             | -0.926573991 |
| 6,664 | SPAG5            | -0.926456057 |
| 6,665 | ZDHHC21          | -0.926377382 |

|       |                    |              |
|-------|--------------------|--------------|
| 6,666 | <i>MRPS25</i>      | -0.926134316 |
| 6,667 | <i>OTP-NT</i>      | -0.926093514 |
| 6,668 | <i>NEUGRIN</i>     | -0.926076345 |
| 6,669 | <i>GABRR1</i>      | -0.925200839 |
| 6,670 | <i>TAS2R3</i>      | -0.925154424 |
| 6,671 | <i>RP4-692D3.1</i> | -0.925147121 |
| 6,672 | <i>MUT</i>         | -0.924904441 |
| 6,673 | <i>E(Y)2</i>       | -0.924784008 |
| 6,674 | <i>OR4F21</i>      | -0.924726461 |
| 6,675 | <i>ZNF257</i>      | -0.924664274 |
| 6,676 | <i>SNAP25</i>      | -0.924582544 |
| 6,677 | <i>MDK</i>         | -0.924482764 |
| 6,678 | <i>RP9</i>         | -0.92440476  |
| 6,679 | <i>CYGB</i>        | -0.92419592  |
| 6,680 | <i>REPS1</i>       | -0.924116176 |
| 6,681 | <i>PLA2G3</i>      | -0.924108051 |
| 6,682 | <i>APCS</i>        | -0.923988379 |
| 6,683 | <i>RANBP9</i>      | -0.923948653 |
| 6,684 | <i>RAB42</i>       | -0.923893016 |
| 6,685 | <i>MAP4K1</i>      | -0.92388751  |
| 6,686 | <i>TP73</i>        | -0.923714947 |
| 6,687 | <i>HDCMA18P</i>    | -0.923704632 |
| 6,688 | <i>MDS010</i>      | -0.923647723 |
| 6,689 | <i>MGC45438</i>    | -0.923551678 |
| 6,690 | <i>FLJ25224</i>    | -0.923199471 |
| 6,691 | <i>GCM2</i>        | -0.923162771 |
| 6,692 | <i>ZNF212</i>      | -0.923059125 |
| 6,693 | <i>AES</i>         | -0.922904997 |
| 6,694 | <i>MTCP1</i>       | -0.922904997 |
| 6,695 | <i>FLJ22419</i>    | -0.922894245 |
| 6,696 | <i>MOCS1</i>       | -0.922721634 |
| 6,697 | <i>XRCC2</i>       | -0.922658264 |
| 6,698 | <i>HS3ST3A1</i>    | -0.92248841  |
| 6,699 | <i>FLJ16139</i>    | -0.922309542 |
| 6,700 | <i>OR1J1</i>       | -0.922215989 |
| 6,701 | <i>GRAMD2</i>      | -0.922175323 |
| 6,702 | <i>DUSP1</i>       | -0.922092493 |
| 6,703 | <i>CTSL</i>        | -0.922047751 |
| 6,704 | <i>MGC70857</i>    | -0.922010989 |
| 6,705 | <i>NDFIP2</i>      | -0.921970919 |
| 6,706 | <i>XYLT2</i>       | -0.921786191 |
| 6,707 | <i>RNF166</i>      | -0.921327591 |
| 6,708 | <i>GP2</i>         | -0.921180328 |
| 6,709 | <i>LYN</i>         | -0.921016914 |
| 6,710 | <i>P14</i>         | -0.921008191 |
| 6,711 | <i>DYRK1A</i>      | -0.920913592 |
| 6,712 | <i>USP15</i>       | -0.920651325 |

|       |                  |              |
|-------|------------------|--------------|
| 6,713 | <i>C7ORF26</i>   | -0.920307698 |
| 6,714 | <i>TIMP4</i>     | -0.920277894 |
| 6,715 | <i>ICAM4</i>     | -0.920126805 |
| 6,716 | <i>C10ORF82</i>  | -0.919890017 |
| 6,717 | <i>FHR-4</i>     | -0.919804968 |
| 6,718 | <i>CAMLG</i>     | -0.919757945 |
| 6,719 | <i>CMRF-35H</i>  | -0.919739461 |
| 6,720 | <i>OR2H1</i>     | -0.91961744  |
| 6,721 | <i>C1orf68</i>   | -0.919308281 |
| 6,722 | <i>CYLC2</i>     | -0.919054648 |
| 6,723 | <i>HPS1</i>      | -0.918814323 |
| 6,724 | <i>FLJ38335</i>  | -0.918743279 |
| 6,725 | <i>SLC26A2</i>   | -0.918609928 |
| 6,726 | <i>PLGL</i>      | -0.918425467 |
| 6,727 | <i>LOC388960</i> | -0.918239609 |
| 6,728 | <i>STX12</i>     | -0.91818413  |
| 6,729 | <i>SP140</i>     | -0.918127201 |
| 6,730 | <i>KIAA0182</i>  | -0.918074311 |
| 6,731 | <i>C8ORF1</i>    | -0.917950073 |
| 6,732 | <i>RNASE7</i>    | -0.917900183 |
| 6,733 | <i>EPHA6</i>     | -0.917567935 |
| 6,734 | <i>GAF1</i>      | -0.917521698 |
| 6,735 | <i>ST3GAL4</i>   | -0.917516451 |
| 6,736 | <i>LGI1</i>      | -0.917458808 |
| 6,737 | <i>CNKSR3</i>    | -0.917262487 |
| 6,738 | <i>LOC643847</i> | -0.917064524 |
| 6,739 | <i>TACR2</i>     | -0.917055993 |
| 6,740 | <i>SPTBN1</i>    | -0.917029067 |
| 6,741 | <i>IDE</i>       | -0.916899311 |
| 6,742 | <i>PCDHB3</i>    | -0.916833258 |
| 6,743 | <i>C9ORF4</i>    | -0.916759187 |
| 6,744 | <i>PHACS</i>     | -0.916727705 |
| 6,745 | <i>FLJ10979</i>  | -0.916595557 |
| 6,746 | <i>C7ORF36</i>   | -0.916564156 |
| 6,747 | <i>LOC129642</i> | -0.916408539 |
| 6,748 | <i>FBXO2</i>     | -0.916042988 |
| 6,749 | <i>TMEM91</i>    | -0.915917644 |
| 6,750 | <i>MCRS1</i>     | -0.915880732 |
| 6,751 | <i>TNIK</i>      | -0.915871157 |
| 6,752 | <i>PEA15</i>     | -0.915757708 |
| 6,753 | <i>MGC5297</i>   | -0.915592709 |
| 6,754 | <i>FLJ16793</i>  | -0.915548777 |
| 6,755 | <i>LOC389458</i> | -0.915528041 |
| 6,756 | <i>ATP2A1</i>    | -0.915189285 |
| 6,757 | <i>HERV-FRD</i>  | -0.915053011 |
| 6,758 | <i>AF1Q</i>      | -0.914982565 |
| 6,759 | <i>TNFAIP8</i>   | -0.914905421 |



|       |                      |              |
|-------|----------------------|--------------|
| 6,760 | <i>ARPC5L</i>        | -0.914731086 |
| 6,761 | <i>FLJ37927</i>      | -0.914505876 |
| 6,762 | <i>FGD2</i>          | -0.914232796 |
| 6,763 | <i>PSMAL/GCP III</i> | -0.914225165 |
| 6,764 | <i>FCGR1B</i>        | -0.914216135 |
| 6,765 | <i>C21ORF51</i>      | -0.914147011 |
| 6,766 | <i>RABL3</i>         | -0.914101528 |
| 6,767 | <i>CAPNS2</i>        | -0.913791912 |
| 6,768 | <i>CLC</i>           | -0.913741543 |
| 6,769 | <i>KIAA0892</i>      | -0.913675151 |
| 6,770 | <i>PAPSS1</i>        | -0.913633871 |
| 6,771 | <i>ZNF35</i>         | -0.913489301 |
| 6,772 | <i>DKFZP564K2062</i> | -0.913411089 |
| 6,773 | <i>ZNF155</i>        | -0.913262642 |
| 6,774 | <i>MAPKAPK3</i>      | -0.913221024 |
| 6,775 | <i>FLJ35630</i>      | -0.912935444 |
| 6,776 | <i>TSPAN14</i>       | -0.912759565 |
| 6,777 | <i>FLJ23235</i>      | -0.912570727 |
| 6,778 | <i>PAX6</i>          | -0.912511327 |
| 6,779 | <i>NEUROD6</i>       | -0.912508854 |
| 6,780 | <i>C1ORF32</i>       | -0.912441529 |
| 6,781 | <i>RSN</i>           | -0.912321765 |
| 6,782 | <i>UBXD3</i>         | -0.912013725 |
| 6,783 | <i>OCM</i>           | -0.911943595 |
| 6,784 | <i>FLJ25801</i>      | -0.911886326 |
| 6,785 | <i>MGC13138</i>      | -0.911784158 |
| 6,786 | <i>NUDT17</i>        | -0.911448293 |
| 6,787 | <i>LAD1</i>          | -0.911367177 |
| 6,788 | <i>SEC14L1</i>       | -0.911366229 |
| 6,789 | <i>DLNB14</i>        | -0.910794532 |
| 6,790 | <i>KIAA1811</i>      | -0.910765566 |
| 6,791 | <i>GALNS</i>         | -0.910087599 |
| 6,792 | <i>YKT6</i>          | -0.909674331 |
| 6,793 | <i>USP33</i>         | -0.909592658 |
| 6,794 | <i>RIOK3</i>         | -0.909507442 |
| 6,795 | <i>RNASE3</i>        | -0.909240173 |
| 6,796 | <i>BAIAP3</i>        | -0.909172245 |
| 6,797 | <i>RNF11</i>         | -0.909168267 |
| 6,798 | <i>FLJ20772</i>      | -0.909103171 |
| 6,799 | <i>FLJ32954</i>      | -0.908889642 |
| 6,800 | <i>CART1</i>         | -0.908812683 |
| 6,801 | <i>LTBR2</i>         | -0.908781315 |
| 6,802 | <i>GL009</i>         | -0.908532859 |
| 6,803 | <i>DKFZP434B1231</i> | -0.90838977  |
| 6,804 | <i>ESPL1</i>         | -0.908251091 |
| 6,805 | <i>IL2</i>           | -0.907303014 |
| 6,806 | <i>PLB1</i>          | -0.906850829 |

|       |                 |              |
|-------|-----------------|--------------|
| 6,807 | <i>MRPL54</i>   | -0.906809167 |
| 6,808 | <i>GFPT1</i>    | -0.906792035 |
| 6,809 | <i>LRRC25</i>   | -0.906785077 |
| 6,810 | <i>LRRC25</i>   | -0.906785077 |
| 6,811 | <i>VPS13C</i>   | -0.906771114 |
| 6,812 | <i>FGF8</i>     | -0.906748242 |
| 6,813 | <i>RNASE1</i>   | -0.906684932 |
| 6,814 | <i>HES4</i>     | -0.906416508 |
| 6,815 | <i>CHGB</i>     | -0.906411869 |
| 6,816 | <i>RCV1</i>     | -0.90631208  |
| 6,817 | <i>SMURF2</i>   | -0.906214792 |
| 6,818 | <i>CTGLF3</i>   | -0.906174432 |
| 6,819 | <i>CTSO</i>     | -0.906136403 |
| 6,820 | <i>OR8K1</i>    | -0.906070853 |
| 6,821 | <i>ADH6</i>     | -0.906003583 |
| 6,822 | <i>RNF146</i>   | -0.905957622 |
| 6,823 | <i>UGT2B4</i>   | -0.905915975 |
| 6,824 | <i>ZNF536</i>   | -0.905609554 |
| 6,825 | <i>DYT1</i>     | -0.905572957 |
| 6,826 | <i>COMTD1</i>   | -0.905523631 |
| 6,827 | <i>GUSBL1</i>   | -0.905417276 |
| 6,828 | <i>METRN</i>    | -0.90484434  |
| 6,829 | <i>NUDT3</i>    | -0.904818561 |
| 6,830 | <i>PWP2H</i>    | -0.904736504 |
| 6,831 | <i>ASAH3</i>    | -0.904196529 |
| 6,832 | <i>HAT</i>      | -0.904128823 |
| 6,833 | <i>SMN1</i>     | -0.904034121 |
| 6,834 | <i>RAI14</i>    | -0.903851662 |
| 6,835 | <i>TARP</i>     | -0.903740799 |
| 6,836 | <i>NGLY1</i>    | -0.903573503 |
| 6,837 | <i>LAIR2</i>    | -0.903532887 |
| 6,838 | <i>DHFR</i>     | -0.903503663 |
| 6,839 | <i>LAMA1</i>    | -0.903318749 |
| 6,840 | <i>RPS14</i>    | -0.903304767 |
| 6,841 | <i>KRTHA2</i>   | -0.903114299 |
| 6,842 | <i>TCTE3</i>    | -0.902972525 |
| 6,843 | <i>ZNF235</i>   | -0.902960714 |
| 6,844 | <i>PORIMIN</i>  | -0.902828277 |
| 6,845 | <i>FLJ20551</i> | -0.902694926 |
| 6,846 | <i>RHBDL4</i>   | -0.902455839 |
| 6,847 | <i>FLJ20641</i> | -0.902364575 |
| 6,848 | <i>MNDA</i>     | -0.902140721 |
| 6,849 | <i>LHFPL1</i>   | -0.902125342 |
| 6,850 | <i>VGf</i>      | -0.901724219 |
| 6,851 | <i>PPIA</i>     | -0.901691178 |
| 6,852 | <i>C14ORF80</i> | -0.901620768 |
| 6,853 | <i>TRPV4</i>    | -0.901229678 |

|       |              |              |
|-------|--------------|--------------|
| 6,854 | NPY2R        | -0.901142079 |
| 6,855 | C1QBP        | -0.90081613  |
| 6,856 | ZNF569       | -0.900776434 |
| 6,857 | FBP1         | -0.900681182 |
| 6,858 | FLJ20516     | -0.900629065 |
| 6,859 | TLK1         | -0.90061252  |
| 6,860 | LOC347487    | -0.900572594 |
| 6,861 | SEC22L3      | -0.900572594 |
| 6,862 | PRL          | -0.900515279 |
| 6,863 | LARS2        | -0.900467277 |
| 6,864 | RYD5         | -0.900350511 |
| 6,865 | FLJ14075     | -0.900181725 |
| 6,866 | NUP188       | -0.900171353 |
| 6,867 | CLK2         | -0.90013111  |
| 6,868 | DAB1         | -0.900052564 |
| 6,869 | ATPAF2       | -0.899812668 |
| 6,870 | DDX46        | -0.899364588 |
| 6,871 | C6ORF157     | -0.899341886 |
| 6,872 | RASGRP1      | -0.899324059 |
| 6,873 | LOC441956    | -0.89930201  |
| 6,874 | NYD-TSP1     | -0.899241921 |
| 6,875 | LCN10        | -0.899237608 |
| 6,876 | OR2A2        | -0.899068248 |
| 6,877 | PX19         | -0.898731073 |
| 6,878 | WARS2        | -0.898722434 |
| 6,879 | SOCS5        | -0.898705686 |
| 6,880 | BHLHB3       | -0.898658398 |
| 6,881 | FANCG        | -0.898631113 |
| 6,882 | CDRT1        | -0.898542934 |
| 6,883 | OR2T11       | -0.898430086 |
| 6,884 | GIYD1        | -0.898339659 |
| 6,885 | SRI          | -0.898193536 |
| 6,886 | C14ORF119    | -0.897913192 |
| 6,887 | DKFZP547C195 | -0.897672522 |
| 6,888 | HECTD2       | -0.897668619 |
| 6,889 | EMX1         | -0.897652322 |
| 6,890 | CPNE3        | -0.897634381 |
| 6,891 | PTD004       | -0.897604572 |
| 6,892 | CCNI         | -0.897293924 |
| 6,893 | ARFGAP1      | -0.897023613 |
| 6,894 | CBWD3        | -0.896921878 |
| 6,895 | EDEM1        | -0.896856298 |
| 6,896 | CENPF        | -0.896536855 |
| 6,897 | DPEP2        | -0.896432067 |
| 6,898 | NDE1         | -0.896254038 |
| 6,899 | TSCOT        | -0.896244309 |
| 6,900 | CA9          | -0.896176204 |

|       |                     |              |
|-------|---------------------|--------------|
| 6,901 | <i>TFE3</i>         | -0.8961394   |
| 6,902 | <i>GPR171</i>       | -0.896125049 |
| 6,903 | <i>HIST1H3A</i>     | -0.896081835 |
| 6,904 | <i>TGM7</i>         | -0.896067691 |
| 6,905 | <i>ZNF288</i>       | -0.896004032 |
| 6,906 | <i>OR56A3</i>       | -0.895970536 |
| 6,907 | <i>OR10Q1</i>       | -0.895849454 |
| 6,908 | <i>ED1</i>          | -0.895823931 |
| 6,909 | <i>DKFZP566O084</i> | -0.895700238 |
| 6,910 | <i>LOC152831</i>    | -0.895516925 |
| 6,911 | <i>TRHR</i>         | -0.89539488  |
| 6,912 | <i>PDXP</i>         | -0.895273238 |
| 6,913 | <i>CYORF15A</i>     | -0.895165642 |
| 6,914 | <i>GPR151</i>       | -0.895114845 |
| 6,915 | <i>B3GNT7</i>       | -0.895074609 |
| 6,916 | <i>MCM8</i>         | -0.895045704 |
| 6,917 | <i>CACNG3</i>       | -0.894909936 |
| 6,918 | <i>SLC13A3</i>      | -0.894195318 |
| 6,919 | <i>FLJ10539</i>     | -0.894076459 |
| 6,920 | <i>ETNK1</i>        | -0.893795837 |
| 6,921 | <i>GRIN2C</i>       | -0.893735614 |
| 6,922 | <i>KIAA0924</i>     | -0.893726705 |
| 6,923 | <i>CMAS</i>         | -0.893534476 |
| 6,924 | <i>COPS7B</i>       | -0.893400322 |
| 6,925 | <i>UBE2J1</i>       | -0.893395532 |
| 6,926 | <i>FLJ33084</i>     | -0.892886372 |
| 6,927 | <i>LOC389792</i>    | -0.892879326 |
| 6,928 | <i>HTR5A</i>        | -0.892761873 |
| 6,929 | <i>NKX2-3</i>       | -0.892718304 |
| 6,930 | <i>DYSF</i>         | -0.892461558 |
| 6,931 | <i>IRLB</i>         | -0.892384201 |
| 6,932 | <i>KIAA0802</i>     | -0.892207001 |
| 6,933 | <i>LOC390535</i>    | -0.891778527 |
| 6,934 | <i>ZNF177</i>       | -0.89175896  |
| 6,935 | <i>FLJ22175</i>     | -0.891628505 |
| 6,936 | <i>GHR</i>          | -0.891518039 |
| 6,937 | <i>MTR</i>          | -0.891449822 |
| 6,938 | <i>DDX42</i>        | -0.891427224 |
| 6,939 | <i>KIAA0319L</i>    | -0.89125108  |
| 6,940 | <i>BCHE</i>         | -0.891067106 |
| 6,941 | <i>SLC35C2</i>      | -0.891013595 |
| 6,942 | <i>NARS</i>         | -0.890950831 |
| 6,943 | <i>HDAC6</i>        | -0.890886495 |
| 6,944 | <i>ATG12</i>        | -0.890790335 |
| 6,945 | <i>TAS1R1</i>       | -0.890716249 |
| 6,946 | <i>C1QB</i>         | -0.890617883 |
| 6,947 | <i>PPP1R3F</i>      | -0.890600968 |

|       |                 |              |
|-------|-----------------|--------------|
| 6,948 | <i>EGR4</i>     | -0.890563916 |
| 6,949 | <i>PNCK</i>     | -0.890245067 |
| 6,950 | <i>CPB2</i>     | -0.8902245   |
| 6,951 | <i>ANKRD7</i>   | -0.889942777 |
| 6,952 | <i>LARS</i>     | -0.88992646  |
| 6,953 | <i>PHIP</i>     | -0.88985807  |
| 6,954 | <i>JARID1A</i>  | -0.889750429 |
| 6,955 | <i>MGC27019</i> | -0.889644611 |
| 6,956 | <i>DDX12</i>    | -0.889411463 |
| 6,957 | <i>SCN1B</i>    | -0.889339742 |
| 6,958 | <i>ZNF495</i>   | -0.889191369 |
| 6,959 | <i>UNQ5783</i>  | -0.889082047 |
| 6,960 | <i>SMARCD1</i>  | -0.889026432 |
| 6,961 | <i>BM88</i>     | -0.888983833 |
| 6,962 | <i>RPL11</i>    | -0.888879157 |
| 6,963 | <i>FLJ23550</i> | -0.888680299 |
| 6,964 | <i>PKM2</i>     | -0.888352545 |
| 6,965 | <i>CD53</i>     | -0.888298786 |
| 6,966 | <i>NEUROD2</i>  | -0.888177751 |
| 6,967 | <i>RASSF6</i>   | -0.888134265 |
| 6,968 | <i>CPSF3</i>    | -0.888126901 |
| 6,969 | <i>TSPAN-2</i>  | -0.888118911 |
| 6,970 | <i>GDF2</i>     | -0.888050398 |
| 6,971 | <i>SERTAD2</i>  | -0.887964387 |
| 6,972 | <i>PAPSS2</i>   | -0.887876164 |
| 6,973 | <i>KIAA1217</i> | -0.887519677 |
| 6,974 | <i>ICT1</i>     | -0.88730426  |
| 6,975 | <i>GRK7</i>     | -0.887202453 |
| 6,976 | <i>ATG5</i>     | -0.887043471 |
| 6,977 | <i>MBD3L2</i>   | -0.886848789 |
| 6,978 | <i>HIAT1</i>    | -0.886679706 |
| 6,979 | <i>SLC15A1</i>  | -0.886620796 |
| 6,980 | <i>FUSIP1</i>   | -0.886430957 |
| 6,981 | <i>MGC12966</i> | -0.886415581 |
| 6,982 | <i>TMEM42</i>   | -0.886279682 |
| 6,983 | <i>MGC48595</i> | -0.886170986 |
| 6,984 | <i>TMPRSS13</i> | -0.886060599 |
| 6,985 | <i>TEAD2</i>    | -0.885896469 |
| 6,986 | <i>SIX5</i>     | -0.885648958 |
| 6,987 | <i>ADCYAP1</i>  | -0.885365692 |
| 6,988 | <i>PNOC</i>     | -0.885292965 |
| 6,989 | <i>NOL8</i>     | -0.885229067 |
| 6,990 | <i>FLJ20265</i> | -0.885194429 |
| 6,991 | <i>KPNA5</i>    | -0.885141438 |
| 6,992 | <i>HBP1</i>     | -0.885112805 |
| 6,993 | <i>GAMT</i>     | -0.885066427 |
| 6,994 | <i>P2RY13</i>   | -0.88506222  |

|       |           |              |
|-------|-----------|--------------|
| 6,995 | WIG1      | -0.884888235 |
| 6,996 | CIR       | -0.884644337 |
| 6,997 | COL9A3    | -0.88443924  |
| 6,998 | GRM2      | -0.884407352 |
| 6,999 | PA2G4     | -0.884387615 |
| 7,000 | ELF4      | -0.884204169 |
| 7,001 | TLR1      | -0.883871277 |
| 7,002 | TUBB4     | -0.883642155 |
| 7,003 | ACTR1B    | -0.883587401 |
| 7,004 | FLJ21919  | -0.883329899 |
| 7,005 | ATP9B     | -0.883050095 |
| 7,006 | UAP1      | -0.882985072 |
| 7,007 | PABPC5    | -0.882896149 |
| 7,008 | GJA3      | -0.882803172 |
| 7,009 | TMEM16B   | -0.882724978 |
| 7,010 | CST9L     | -0.882673032 |
| 7,011 | PTPRE     | -0.882464311 |
| 7,012 | C10ORF92  | -0.882335686 |
| 7,013 | PWWP1     | -0.882321861 |
| 7,014 | ENSA      | -0.882279983 |
| 7,015 | SLC6A2    | -0.882202015 |
| 7,016 | ALF       | -0.882032617 |
| 7,017 | NR1H3     | -0.881861047 |
| 7,018 | PACE-1    | -0.881708316 |
| 7,019 | QSCN6     | -0.881603039 |
| 7,020 | CCT5      | -0.881439737 |
| 7,021 | LOC644006 | -0.881233856 |
| 7,022 | CTSL2     | -0.881090231 |
| 7,023 | RTN4R     | -0.880973799 |
| 7,024 | ZDHHC14   | -0.880931857 |
| 7,025 | LOC654346 | -0.880877439 |
| 7,026 | SET       | -0.880830435 |
| 7,027 | LOC552891 | -0.880826944 |
| 7,028 | ACSL4     | -0.880784174 |
| 7,029 | PME-1     | -0.880724047 |
| 7,030 | TARBP2    | -0.880698777 |
| 7,031 | LOC389123 | -0.880518565 |
| 7,032 | GBP2      | -0.880493476 |
| 7,033 | RAB40C    | -0.880368156 |
| 7,034 | MXD3      | -0.880097559 |
| 7,035 | MPHOSPH1  | -0.880052638 |
| 7,036 | PTDSS1    | -0.87999152  |
| 7,037 | C16ORF3   | -0.879956719 |
| 7,038 | CX36      | -0.879900249 |
| 7,039 | NBL1      | -0.879875997 |
| 7,040 | CACNA1E   | -0.879671151 |
| 7,041 | SH2D3C    | -0.879348654 |

|       |                    |              |
|-------|--------------------|--------------|
| 7,042 | <i>HIAN7</i>       | -0.879343534 |
| 7,043 | <i>RNF39</i>       | -0.879252228 |
| 7,044 | <i>FLJ10581</i>    | -0.879185866 |
| 7,045 | <i>USP45</i>       | -0.879139559 |
| 7,046 | <i>APLN</i>        | -0.878817101 |
| 7,047 | <i>MTRR</i>        | -0.878796395 |
| 7,048 | <i>PPP4C</i>       | -0.878354604 |
| 7,049 | <i>NLGN1</i>       | -0.878301306 |
| 7,050 | <i>MGC45416</i>    | -0.878128447 |
| 7,051 | <i>LOC92906</i>    | -0.877944368 |
| 7,052 | <i>HRBL</i>        | -0.877664848 |
| 7,053 | <i>ZNF307</i>      | -0.877459285 |
| 7,054 | <i>POP1</i>        | -0.877416638 |
| 7,055 | <i>PIAS4</i>       | -0.877259815 |
| 7,056 | <i>UGT2B15</i>     | -0.877222664 |
| 7,057 | <i>TBX19</i>       | -0.87722125  |
| 7,058 | <i>MGC42367</i>    | -0.87709999  |
| 7,059 | <i>GCS1</i>        | -0.877066626 |
| 7,060 | <i>OACT1</i>       | -0.876932914 |
| 7,061 | <i>FLJ10116</i>    | -0.876932237 |
| 7,062 | <i>LOC284274</i>   | -0.876769739 |
| 7,063 | <i>BRD7</i>        | -0.876717643 |
| 7,064 | <i>GAPDS</i>       | -0.876623139 |
| 7,065 | <i>SP3</i>         | -0.876600492 |
| 7,066 | <i>USP6NL</i>      | -0.876553749 |
| 7,067 | <i>UBE3C</i>       | -0.876303187 |
| 7,068 | <i>RP13-36C9.6</i> | -0.875950046 |
| 7,069 | <i>TMEM14C</i>     | -0.875944025 |
| 7,070 | <i>TRIM31</i>      | -0.875674021 |
| 7,071 | <i>GPR103</i>      | -0.875580905 |
| 7,072 | <i>SMAP1</i>       | -0.875493074 |
| 7,073 | <i>RGPD5</i>       | -0.87509983  |
| 7,074 | <i>OXCT2</i>       | -0.875046267 |
| 7,075 | <i>MGC33607</i>    | -0.87493848  |
| 7,076 | <i>TRERF1</i>      | -0.874844879 |
| 7,077 | <i>RAB11-FIP2</i>  | -0.874510697 |
| 7,078 | <i>NKIR</i>        | -0.874136634 |
| 7,079 | <i>ADA</i>         | -0.874127443 |
| 7,080 | <i>FLJ37099</i>    | -0.873904175 |
| 7,081 | <i>HOXD13</i>      | -0.873865088 |
| 7,082 | <i>ZNF302</i>      | -0.87386249  |
| 7,083 | <i>RBAK</i>        | -0.873833516 |
| 7,084 | <i>RDH5</i>        | -0.873753101 |
| 7,085 | <i>ABCC4</i>       | -0.873626945 |
| 7,086 | <i>FLJ31795</i>    | -0.873465911 |
| 7,087 | <i>HLA-DQB1</i>    | -0.873441053 |
| 7,088 | <i>PM5</i>         | -0.873286403 |

|       |              |              |
|-------|--------------|--------------|
| 7,089 | UBE1         | -0.872884718 |
| 7,090 | NFATC2       | -0.872843199 |
| 7,091 | AKR1B1       | -0.872777893 |
| 7,092 | CLDN9        | -0.872679889 |
| 7,093 | LDB3         | -0.872567794 |
| 7,094 | SSX2IP       | -0.872383389 |
| 7,095 | MARCO        | -0.872228267 |
| 7,096 | LOC155006    | -0.872213118 |
| 7,097 | ATPIF1       | -0.872006859 |
| 7,098 | ZNF696       | -0.871475469 |
| 7,099 | SREBF2       | -0.871334575 |
| 7,100 | CCNA1        | -0.871294328 |
| 7,101 | CT45-6       | -0.871258542 |
| 7,102 | PTPRZ1       | -0.871220967 |
| 7,103 | CBX7         | -0.871217183 |
| 7,104 | LDHC         | -0.870926814 |
| 7,105 | SCGB2A2      | -0.87076859  |
| 7,106 | DKFZP761H039 | -0.870749589 |
| 7,107 | PPP3R2       | -0.87074351  |
| 7,108 | FLJ33790     | -0.870582369 |
| 7,109 | FLJ25477     | -0.870423093 |
| 7,110 | LOC51204     | -0.870389086 |
| 7,111 | PCDHB7       | -0.870219138 |
| 7,112 | FLJ26175     | -0.870206548 |
| 7,113 | PRRX1        | -0.870114716 |
| 7,114 | CENPH        | -0.870097883 |
| 7,115 | P2RY8        | -0.870082462 |
| 7,116 | TRIM38       | -0.86993545  |
| 7,117 | SHOX         | -0.869840101 |
| 7,118 | DAPP1        | -0.869823734 |
| 7,119 | GALR1        | -0.869662913 |
| 7,120 | LOC284434    | -0.869529921 |
| 7,121 | NLGN3        | -0.869433516 |
| 7,122 | CXORF17      | -0.869200346 |
| 7,123 | FAH          | -0.869041853 |
| 7,124 | GABPA        | -0.868895159 |
| 7,125 | C17ORF27     | -0.868494563 |
| 7,126 | RFC4         | -0.868480155 |
| 7,127 | RPP30        | -0.868392706 |
| 7,128 | COX5B        | -0.868196947 |
| 7,129 | TNPO2        | -0.867971343 |
| 7,130 | C20ORF24     | -0.867794634 |
| 7,131 | SIRT7        | -0.867702168 |
| 7,132 | TNFRSF13B    | -0.867596434 |
| 7,133 | OR10K2       | -0.867574095 |
| 7,134 | SHAX3        | -0.86754228  |
| 7,135 | KIAA1143     | -0.86754218  |



|       |                    |              |
|-------|--------------------|--------------|
| 7,136 | <i>RIPK3</i>       | -0.867434455 |
| 7,137 | <i>NALP5</i>       | -0.867417368 |
| 7,138 | <i>CD72</i>        | -0.867177923 |
| 7,139 | <i>CYSLTR1</i>     | -0.867171436 |
| 7,140 | <i>IFRD1</i>       | -0.867147892 |
| 7,141 | <i>ETV3</i>        | -0.867095325 |
| 7,142 | <i>FLJ23033</i>    | -0.866921173 |
| 7,143 | <i>LARP5</i>       | -0.86675658  |
| 7,144 | <i>TCTEL1</i>      | -0.866573085 |
| 7,145 | <i>F8A3</i>        | -0.866455102 |
| 7,146 | <i>RP11-19J3.3</i> | -0.866382054 |
| 7,147 | <i>NP220</i>       | -0.866239041 |
| 7,148 | <i>FLJ90575</i>    | -0.866186168 |
| 7,149 | <i>FLJ38348</i>    | -0.865947742 |
| 7,150 | <i>C22orf36</i>    | -0.86590588  |
| 7,151 | <i>PI3</i>         | -0.865888906 |
| 7,152 | <i>TOM1L2</i>      | -0.865887724 |
| 7,153 | <i>LHX4</i>        | -0.865880658 |
| 7,154 | <i>KIAA0853</i>    | -0.865834694 |
| 7,155 | <i>ARPC3</i>       | -0.865753648 |
| 7,156 | <i>DEFB136</i>     | -0.865629016 |
| 7,157 | <i>JARID1D</i>     | -0.865502743 |
| 7,158 | <i>SBZF3</i>       | -0.86507338  |
| 7,159 | <i>KIAA0372</i>    | -0.865067255 |
| 7,160 | <i>DOLPP1</i>      | -0.864874569 |
| 7,161 | <i>RAP140</i>      | -0.864820939 |
| 7,162 | <i>LOC348262</i>   | -0.864747163 |
| 7,163 | <i>IGHMBP2</i>     | -0.86422022  |
| 7,164 | <i>ATP4A</i>       | -0.864099961 |
| 7,165 | <i>HIS1</i>        | -0.863956188 |
| 7,166 | <i>DNAJB5</i>      | -0.863865366 |
| 7,167 | <i>KIAA1212</i>    | -0.863597872 |
| 7,168 | <i>TMEM26</i>      | -0.863530929 |
| 7,169 | <i>AP3M1</i>       | -0.863438217 |
| 7,170 | <i>OR13G1</i>      | -0.863276676 |
| 7,171 | <i>SLC10A3</i>     | -0.863139774 |
| 7,172 | <i>OR8B12</i>      | -0.862853196 |
| 7,173 | <i>ACTN3</i>       | -0.862495912 |
| 7,174 | <i>FLJ13984</i>    | -0.862361009 |
| 7,175 | <i>CHRNA3</i>      | -0.862204907 |
| 7,176 | <i>HLA-C</i>       | -0.862052404 |
| 7,177 | <i>SLC9A3</i>      | -0.861930727 |
| 7,178 | <i>TRIP12</i>      | -0.861774693 |
| 7,179 | <i>ABCC9</i>       | -0.861728711 |
| 7,180 | <i>C1orf162</i>    | -0.861649907 |
| 7,181 | <i>GTPBP3</i>      | -0.861646176 |
| 7,182 | <i>PSG5</i>        | -0.861633978 |

|       |                     |              |
|-------|---------------------|--------------|
| 7,183 | <i>UGT1A8</i>       | -0.861554017 |
| 7,184 | <i>CYBRD1</i>       | -0.861424992 |
| 7,185 | <i>HSCARG</i>       | -0.861250148 |
| 7,186 | <i>WNT10A</i>       | -0.86089647  |
| 7,187 | <i>RPL14</i>        | -0.86081074  |
| 7,188 | <i>INPP5B</i>       | -0.860714891 |
| 7,189 | <i>SET7</i>         | -0.860653126 |
| 7,190 | <i>TP73L</i>        | -0.86043938  |
| 7,191 | <i>HIRIP3</i>       | -0.860359738 |
| 7,192 | <i>CEACAM4</i>      | -0.86023487  |
| 7,193 | <i>ALG12</i>        | -0.860217938 |
| 7,194 | <i>MGC2654</i>      | -0.859995375 |
| 7,195 | <i>DCBLD1</i>       | -0.859937241 |
| 7,196 | <i>MTAC2D1</i>      | -0.859906133 |
| 7,197 | <i>LAMB3</i>        | -0.85979448  |
| 7,198 | <i>GJA1</i>         | -0.859585746 |
| 7,199 | <i>C9ORF20</i>      | -0.85933513  |
| 7,200 | <i>RPE</i>          | -0.859268286 |
| 7,201 | <i>ARRDC3</i>       | -0.859244441 |
| 7,202 | <i>CENTA2</i>       | -0.859101141 |
| 7,203 | <i>CSNK1D</i>       | -0.859057301 |
| 7,204 | <i>KIAA1194</i>     | -0.858879977 |
| 7,205 | <i>SOX3</i>         | -0.858814471 |
| 7,206 | <i>PPFIA3</i>       | -0.858738799 |
| 7,207 | <i>KCNS3</i>        | -0.858669194 |
| 7,208 | <i>NOVA1</i>        | -0.858381097 |
| 7,209 | <i>RECK</i>         | -0.858270955 |
| 7,210 | <i>BEX1</i>         | -0.8582628   |
| 7,211 | <i>COL14A1</i>      | -0.858155578 |
| 7,212 | <i>DKFZP434C245</i> | -0.858107967 |
| 7,213 | <i>FES</i>          | -0.858090454 |
| 7,214 | <i>GATM</i>         | -0.85796789  |
| 7,215 | <i>C20ORF103</i>    | -0.857859946 |
| 7,216 | <i>PHOSPHO1</i>     | -0.857432346 |
| 7,217 | <i>UQCRC2</i>       | -0.857379213 |
| 7,218 | <i>FLJ20481</i>     | -0.857343225 |
| 7,219 | <i>SLC13A2</i>      | -0.857311997 |
| 7,220 | <i>C20ORF129</i>    | -0.857291287 |
| 7,221 | <i>MGC8902</i>      | -0.857177551 |
| 7,222 | <i>FHL2</i>         | -0.85706922  |
| 7,223 | <i>FRZB</i>         | -0.85703499  |
| 7,224 | <i>OR52W1</i>       | -0.856570619 |
| 7,225 | <i>ZDHHC19</i>      | -0.856533417 |
| 7,226 | <i>TMPRSS5</i>      | -0.856148574 |
| 7,227 | <i>UNQ9391</i>      | -0.856070637 |
| 7,228 | <i>ZBTB11</i>       | -0.855971147 |
| 7,229 | <i>MLLT7</i>        | -0.855926475 |

|       |              |              |
|-------|--------------|--------------|
| 7,230 | FABP3        | -0.85588289  |
| 7,231 | BID          | -0.855731453 |
| 7,232 | PRKCABP      | -0.855275237 |
| 7,233 | MGC14156     | -0.855152596 |
| 7,234 | HT017        | -0.855040771 |
| 7,235 | DKFZP727G131 | -0.855001966 |
| 7,236 | SLC37A1      | -0.854868294 |
| 7,237 | TSPAN11      | -0.854826468 |
| 7,238 | FLJ12681     | -0.85473425  |
| 7,239 | NAP5         | -0.854551557 |
| 7,240 | STX3A        | -0.854551335 |
| 7,241 | SWS1         | -0.854327339 |
| 7,242 | MOSPD1       | -0.85382624  |
| 7,243 | C10ORF93     | -0.853709457 |
| 7,244 | ATF3         | -0.853486171 |
| 7,245 | LOC129881    | -0.853287946 |
| 7,246 | PCDHA11      | -0.853159951 |
| 7,247 | LASP1        | -0.853159951 |
| 7,248 | PP784        | -0.853151688 |
| 7,249 | KRTAP3-2     | -0.853064894 |
| 7,250 | INSIG1       | -0.85294684  |
| 7,251 | RDH8         | -0.852921624 |
| 7,252 | KIAA1764     | -0.852752291 |
| 7,253 | EIF2AK4      | -0.852699357 |
| 7,254 | SARM1        | -0.8526883   |
| 7,255 | CFHL1        | -0.851728982 |
| 7,256 | SLC39A2      | -0.85165156  |
| 7,257 | ARSB         | -0.851608685 |
| 7,258 | ESRRA        | -0.851542569 |
| 7,259 | COLQ         | -0.851539287 |
| 7,260 | PRKRA        | -0.851528426 |
| 7,261 | HES3         | -0.851376315 |
| 7,262 | COBRA1       | -0.851328607 |
| 7,263 | YIPF2        | -0.851167331 |
| 7,264 | MRGPRX1      | -0.851097949 |
| 7,265 | ACIN1        | -0.851021656 |
| 7,266 | FLJ90166     | -0.850866787 |
| 7,267 | CLPX         | -0.850765868 |
| 7,268 | AP2A2        | -0.850521769 |
| 7,269 | PDC          | -0.850465609 |
| 7,270 | C9ORF150     | -0.850465582 |
| 7,271 | NEFH         | -0.850411087 |
| 7,272 | MMRP19       | -0.85033793  |
| 7,273 | LOC388394    | -0.85022264  |
| 7,274 | NOTCH4       | -0.85015095  |
| 7,275 | KIAA0514     | -0.850042131 |
| 7,276 | FLJ23356     | -0.849914673 |

|       |           |              |
|-------|-----------|--------------|
| 7,277 | FLJ31547  | -0.849696814 |
| 7,278 | HLA-DMA   | -0.849621529 |
| 7,279 | ZNF41     | -0.849575389 |
| 7,280 | GABRR3    | -0.849459729 |
| 7,281 | MGC24975  | -0.849376068 |
| 7,282 | LOC387758 | -0.849293708 |
| 7,283 | PPM1H     | -0.849233745 |
| 7,284 | LOC388960 | -0.849188264 |
| 7,285 | CPAMD8    | -0.849125303 |
| 7,286 | GTF2F2    | -0.848973693 |
| 7,287 | FLJ21687  | -0.848565856 |
| 7,288 | MARCH7    | -0.848441379 |
| 7,289 | PON2      | -0.848364358 |
| 7,290 | TP53TG3   | -0.848307861 |
| 7,291 | ABLIM2    | -0.847912978 |
| 7,292 | HOXB13    | -0.847845393 |
| 7,293 | THPO      | -0.847838853 |
| 7,294 | CHAD      | -0.847692128 |
| 7,295 | SUCLA2    | -0.847462291 |
| 7,296 | STN2      | -0.847345654 |
| 7,297 | BUB1B     | -0.847320832 |
| 7,298 | GPR154    | -0.847203713 |
| 7,299 | BATF      | -0.847076374 |
| 7,300 | PERQ1     | -0.846907191 |
| 7,301 | PGBD3     | -0.846823285 |
| 7,302 | EXOSC2    | -0.846491734 |
| 7,303 | OR5K3     | -0.846430167 |
| 7,304 | NRXN3     | -0.84599285  |
| 7,305 | C7ORF28B  | -0.845947016 |
| 7,306 | CSMD3     | -0.84592596  |
| 7,307 | PAH       | -0.845902891 |
| 7,308 | EPRS      | -0.84584137  |
| 7,309 | STIM1     | -0.845668629 |
| 7,310 | SIT       | -0.845505697 |
| 7,311 | GALNT14   | -0.845477205 |
| 7,312 | PCDHA2    | -0.845454593 |
| 7,313 | PMM1      | -0.845182891 |
| 7,314 | P2RX3     | -0.845015205 |
| 7,315 | PRKX      | -0.845014855 |
| 7,316 | KIAA1012  | -0.844860288 |
| 7,317 | CHD4      | -0.844842209 |
| 7,318 | MGC3200   | -0.844619052 |
| 7,319 | STX11     | -0.844513174 |
| 7,320 | SLC33A1   | -0.844098668 |
| 7,321 | TEC       | -0.844033885 |
| 7,322 | TCF3      | -0.843908827 |
| 7,323 | PTGES     | -0.843795651 |

|       |           |              |
|-------|-----------|--------------|
| 7,324 | CDK4      | -0.843765551 |
| 7,325 | ALOX5AP   | -0.843655994 |
| 7,326 | HT021     | -0.843550476 |
| 7,327 | FLJ22353  | -0.843243126 |
| 7,328 | NT5C3     | -0.843203778 |
| 7,329 | TNPO3     | -0.843099973 |
| 7,330 | SGK2      | -0.843083972 |
| 7,331 | C19ORF22  | -0.842861888 |
| 7,332 | CAP350    | -0.842808368 |
| 7,333 | MMP3      | -0.842626368 |
| 7,334 | FLJ20898  | -0.842616428 |
| 7,335 | LOC389852 | -0.842616428 |
| 7,336 | LOC646498 | -0.842492867 |
| 7,337 | CLTA      | -0.841733746 |
| 7,338 | C6ORF11   | -0.841461646 |
| 7,339 | GREB1     | -0.841444731 |
| 7,340 | GPNMB     | -0.841352479 |
| 7,341 | CDV-1     | -0.84110315  |
| 7,342 | UNC13C    | -0.840933364 |
| 7,343 | TTK       | -0.840922092 |
| 7,344 | HIST1H4H  | -0.840810716 |
| 7,345 | RGS7      | -0.840681007 |
| 7,346 | HOOK2     | -0.840673628 |
| 7,347 | WHSC2     | -0.840425266 |
| 7,348 | BTBD1     | -0.840290858 |
| 7,349 | IFI44     | -0.840251105 |
| 7,350 | FLJ33674  | -0.839964206 |
| 7,351 | ADPN      | -0.839712857 |
| 7,352 | MT1X      | -0.839711124 |
| 7,353 | LOC163782 | -0.839431642 |
| 7,354 | DEC1      | -0.838780591 |
| 7,355 | BMP4      | -0.838673464 |
| 7,356 | TM7SF2    | -0.838628719 |
| 7,357 | RRM2B     | -0.83850529  |
| 7,358 | SSNA1     | -0.838366241 |
| 7,359 | LOC440348 | -0.838295672 |
| 7,360 | RANBP17   | -0.838258755 |
| 7,361 | CSE1L     | -0.838026764 |
| 7,362 | CLN5      | -0.837437986 |
| 7,363 | TRIP      | -0.83738164  |
| 7,364 | ARSD      | -0.837281078 |
| 7,365 | SYP       | -0.83716741  |
| 7,366 | LOC338661 | -0.836999092 |
| 7,367 | ZFX       | -0.836976798 |
| 7,368 | TRIM28    | -0.836874353 |
| 7,369 | BMI1      | -0.836859426 |
| 7,370 | SPINK5L2  | -0.836664035 |

|       |              |              |
|-------|--------------|--------------|
| 7,371 | MAPK6        | -0.836583473 |
| 7,372 | CPXM         | -0.836399055 |
| 7,373 | GYPC         | -0.836314049 |
| 7,374 | C2           | -0.836203605 |
| 7,375 | PSPC1        | -0.836154268 |
| 7,376 | GRLF1        | -0.835817045 |
| 7,377 | DKFZP434C212 | -0.835797467 |
| 7,378 | ARHGEF9      | -0.835722584 |
| 7,379 | ITGB6        | -0.835667429 |
| 7,380 | MGC11386     | -0.835613119 |
| 7,381 | EDN3         | -0.835563652 |
| 7,382 | SFTPA1       | -0.835444457 |
| 7,383 | DHX36        | -0.835419592 |
| 7,384 | FOSL1        | -0.835355165 |
| 7,385 | MY048        | -0.835331608 |
| 7,386 | LOC128344    | -0.834522567 |
| 7,387 | MGC2963      | -0.834401058 |
| 7,388 | FLJ46838     | -0.83434328  |
| 7,389 | BDP1         | -0.834304166 |
| 7,390 | ELSPBP1      | -0.834296771 |
| 7,391 | KIAA1465     | -0.834263053 |
| 7,392 | GPR123       | -0.834040253 |
| 7,393 | POU1F1       | -0.833906803 |
| 7,394 | DIO1         | -0.833883024 |
| 7,395 | MAMDC1       | -0.833782309 |
| 7,396 | OR8A1        | -0.833743853 |
| 7,397 | MGC29729     | -0.83372282  |
| 7,398 | TRIM71       | -0.833722538 |
| 7,399 | FKBP4        | -0.83366993  |
| 7,400 | K6IRS2       | -0.833534576 |
| 7,401 | XAB1         | -0.83350937  |
| 7,402 | ZNF333       | -0.833395904 |
| 7,403 | KRT25D       | -0.833188208 |
| 7,404 | HTRA3        | -0.833160444 |
| 7,405 | CPA1         | -0.8331563   |
| 7,406 | FLJ25773     | -0.832914369 |
| 7,407 | ATAD3B       | -0.832821087 |
| 7,408 | PICALM       | -0.832808082 |
| 7,409 | ANKRD15      | -0.832791413 |
| 7,410 | SLC3A2       | -0.832668924 |
| 7,411 | VCL          | -0.832520648 |
| 7,412 | CD109        | -0.832442257 |
| 7,413 | MAC30        | -0.832409823 |
| 7,414 | FLJ20433     | -0.832400933 |
| 7,415 | MGC57211     | -0.832374812 |
| 7,416 | POPDC3       | -0.832272973 |
| 7,417 | MAD2L1BP     | -0.832196989 |

|       |                      |              |
|-------|----------------------|--------------|
| 7,418 | <i>U1SNRNPBP</i>     | -0.832086535 |
| 7,419 | <i>ASL</i>           | -0.831980837 |
| 7,420 | <i>RAX</i>           | -0.831937565 |
| 7,421 | <i>DCTN4</i>         | -0.83191864  |
| 7,422 | <i>C7ORF27</i>       | -0.831733184 |
| 7,423 | <i>MIST</i>          | -0.831641828 |
| 7,424 | <i>STARD4</i>        | -0.831430512 |
| 7,425 | <i>LOC389874</i>     | -0.831367948 |
| 7,426 | <i>CAB39L</i>        | -0.830977646 |
| 7,427 | <i>ZNF629</i>        | -0.830626609 |
| 7,428 | <i>PIN1</i>          | -0.830451861 |
| 7,429 | <i>ZNF585B</i>       | -0.830419486 |
| 7,430 | <i>SLB</i>           | -0.830279852 |
| 7,431 | <i>SDPR</i>          | -0.830242952 |
| 7,432 | <i>ASMT</i>          | -0.829940814 |
| 7,433 | <i>XKRX</i>          | -0.829824846 |
| 7,434 | <i>LOC391059</i>     | -0.829783734 |
| 7,435 | <i>CGI-128</i>       | -0.829625195 |
| 7,436 | <i>PROSAPIP1</i>     | -0.829524619 |
| 7,437 | <i>CACNA2D4</i>      | -0.829498642 |
| 7,438 | <i>PRDX1</i>         | -0.829434448 |
| 7,439 | <i>SPIN-2</i>        | -0.829251289 |
| 7,440 | <i>TMEM16E</i>       | -0.82924618  |
| 7,441 | <i>PREP</i>          | -0.829179153 |
| 7,442 | <i>MFAP3L</i>        | -0.829148002 |
| 7,443 | <i>DEFB106B</i>      | -0.82914734  |
| 7,444 | <i>WDR11</i>         | -0.829110703 |
| 7,445 | <i>CLEC6A</i>        | -0.829106148 |
| 7,446 | <i>ZNF134</i>        | -0.829072649 |
| 7,447 | <i>SLC16A6</i>       | -0.829043343 |
| 7,448 | <i>HBLD2</i>         | -0.829003834 |
| 7,449 | <i>PCSK5</i>         | -0.828987044 |
| 7,450 | <i>LDHA</i>          | -0.828666234 |
| 7,451 | <i>HSU24186</i>      | -0.828579297 |
| 7,452 | <i>HS6ST2</i>        | -0.82847258  |
| 7,453 | <i>SGEF</i>          | -0.828282469 |
| 7,454 | <i>FLJ32001</i>      | -0.828263769 |
| 7,455 | <i>VPS29</i>         | -0.828219259 |
| 7,456 | <i>FLJ35728</i>      | -0.827878962 |
| 7,457 | <i>LPIN3</i>         | -0.827878703 |
| 7,458 | <i>DKFZP434K1172</i> | -0.827709214 |
| 7,459 | <i>MGC26963</i>      | -0.827397159 |
| 7,460 | <i>NAPG</i>          | -0.827287094 |
| 7,461 | <i>SDC3</i>          | -0.827119224 |
| 7,462 | <i>BAT3</i>          | -0.827093651 |
| 7,463 | <i>PYGB</i>          | -0.82708024  |
| 7,464 | <i>FLJ20203</i>      | -0.82706387  |

|       |          |              |
|-------|----------|--------------|
| 7,465 | HIAN6    | -0.826865888 |
| 7,466 | C2ORF21  | -0.826708217 |
| 7,467 | SSTK-IP  | -0.826218307 |
| 7,468 | OR52B2   | -0.826113804 |
| 7,469 | GPX1     | -0.826090769 |
| 7,470 | KIAA0553 | -0.825721076 |
| 7,471 | LILRB2   | -0.82564711  |
| 7,472 | FLJ35681 | -0.825569759 |
| 7,473 | FLJ32130 | -0.825293206 |
| 7,474 | MGC13114 | -0.82522884  |
| 7,475 | OTP      | -0.825165118 |
| 7,476 | PPIC     | -0.825034153 |
| 7,477 | MPHOSPH9 | -0.824844738 |
| 7,478 | MGC17301 | -0.824831595 |
| 7,479 | PAPPA    | -0.824806282 |
| 7,480 | SFRS9    | -0.824771857 |
| 7,481 | OR5R1    | -0.824408774 |
| 7,482 | FLJ25955 | -0.824405851 |
| 7,483 | RFXAP    | -0.824360674 |
| 7,484 | LMCD1    | -0.82407222  |
| 7,485 | IL12RB2  | -0.823828828 |
| 7,486 | ZNF248   | -0.823568698 |
| 7,487 | SLC1A7   | -0.823451694 |
| 7,488 | OR2A5    | -0.822912411 |
| 7,489 | FLJ10490 | -0.822897011 |
| 7,490 | UBE1L    | -0.822889607 |
| 7,491 | SLC22A8  | -0.822769348 |
| 7,492 | OR1G1    | -0.822198519 |
| 7,493 | LHX8     | -0.822166171 |
| 7,494 | TAGAP    | -0.821976123 |
| 7,495 | C22ORF16 | -0.821958671 |
| 7,496 | DIXDC1   | -0.821761989 |
| 7,497 | GPR4     | -0.821464656 |
| 7,498 | ZIC2     | -0.821365026 |
| 7,499 | OR1D5    | -0.821315345 |
| 7,500 | PDCD6    | -0.821231399 |
| 7,501 | SETD1A   | -0.821077897 |
| 7,502 | UTY      | -0.821047813 |
| 7,503 | UTY      | -0.821047813 |
| 7,504 | NOSIP    | -0.820931528 |
| 7,505 | NPTXR    | -0.820812694 |
| 7,506 | NFKB1    | -0.820808688 |
| 7,507 | C6orf190 | -0.820488828 |
| 7,508 | COL12A1  | -0.820321245 |
| 7,509 | NALP13   | -0.820200244 |
| 7,510 | KIAA1228 | -0.82016105  |
| 7,511 | OR6K6    | -0.820046922 |



|       |                      |              |
|-------|----------------------|--------------|
| 7,512 | <i>HSPC163</i>       | -0.819789715 |
| 7,513 | <i>RHEB</i>          | -0.819706523 |
| 7,514 | <i>FLJ30668</i>      | -0.819678214 |
| 7,515 | <i>IPLA2(GAMMA)</i>  | -0.819509376 |
| 7,516 | <i>CLIC2</i>         | -0.819494091 |
| 7,517 | <i>MRPS34</i>        | -0.819389691 |
| 7,518 | <i>SLC10A6</i>       | -0.819163407 |
| 7,519 | <i>IRF2BP1</i>       | -0.819096383 |
| 7,520 | <i>SH3BGRL3</i>      | -0.819049987 |
| 7,521 | <i>SLC23A3</i>       | -0.818936745 |
| 7,522 | <i>RARG</i>          | -0.818932308 |
| 7,523 | <i>INPPL1</i>        | -0.818874903 |
| 7,524 | <i>ZNF565</i>        | -0.818738844 |
| 7,525 | <i>FLJ10504</i>      | -0.818585661 |
| 7,526 | <i>RNF144</i>        | -0.818542285 |
| 7,527 | <i>FLJ30596</i>      | -0.818349054 |
| 7,528 | <i>MGC39724</i>      | -0.818261415 |
| 7,529 | <i>RDH14</i>         | -0.818089249 |
| 7,530 | <i>SLC23A2</i>       | -0.817877904 |
| 7,531 | <i>DKFZP686G0786</i> | -0.817846819 |
| 7,532 | <i>C21ORF2</i>       | -0.817803921 |
| 7,533 | <i>PREB</i>          | -0.817424186 |
| 7,534 | <i>PNLDC1</i>        | -0.817226739 |
| 7,535 | <i>FLJ45235</i>      | -0.817137694 |
| 7,536 | <i>CTNNA3</i>        | -0.817029601 |
| 7,537 | <i>IBRDC1</i>        | -0.816921233 |
| 7,538 | <i>TXK</i>           | -0.816789354 |
| 7,539 | <i>DKFZP434I092</i>  | -0.816725626 |
| 7,540 | <i>PCDHGB2</i>       | -0.816682862 |
| 7,541 | <i>SARG</i>          | -0.816532087 |
| 7,542 | <i>EP400</i>         | -0.816448025 |
| 7,543 | <i>GPD1L</i>         | -0.816409735 |
| 7,544 | <i>FLJ30707</i>      | -0.816311145 |
| 7,545 | <i>FJX1</i>          | -0.816049428 |
| 7,546 | <i>TREML2</i>        | -0.816020031 |
| 7,547 | <i>FLJ10980</i>      | -0.815982938 |
| 7,548 | <i>PEPP3</i>         | -0.815877605 |
| 7,549 | <i>TUFM</i>          | -0.815702111 |
| 7,550 | <i>GALC</i>          | -0.815565477 |
| 7,551 | <i>SLC39A8</i>       | -0.815159525 |
| 7,552 | <i>DNASE2</i>        | -0.815149172 |
| 7,553 | <i>OR5AT1</i>        | -0.815128174 |
| 7,554 | <i>SLC4A9</i>        | -0.81506418  |
| 7,555 | <i>ADH5</i>          | -0.814917314 |
| 7,556 | <i>FKBP5</i>         | -0.814436659 |
| 7,557 | <i>PFKFB1</i>        | -0.814429871 |
| 7,558 | <i>KIAA1409</i>      | -0.814370456 |

|       |           |              |
|-------|-----------|--------------|
| 7,559 | KIAA1409  | -0.814370456 |
| 7,560 | FLJ40137  | -0.814109296 |
| 7,561 | TTC14     | -0.81401343  |
| 7,562 | RAB12     | -0.813950968 |
| 7,563 | IDH2      | -0.813895849 |
| 7,564 | ABCG4     | -0.813847544 |
| 7,565 | MGC39325  | -0.813734576 |
| 7,566 | IL5       | -0.813504801 |
| 7,567 | SPRY3     | -0.813462613 |
| 7,568 | HIST2H2AB | -0.813369682 |
| 7,569 | LOC51244  | -0.813121098 |
| 7,570 | KLF7      | -0.812874158 |
| 7,571 | SCYL1     | -0.812717986 |
| 7,572 | KCND2     | -0.81257134  |
| 7,573 | FDXR      | -0.812546291 |
| 7,574 | LIPI      | -0.812259289 |
| 7,575 | ZNF436    | -0.812170946 |
| 7,576 | UGCGL1    | -0.812043763 |
| 7,577 | CMRF35    | -0.811981723 |
| 7,578 | RAB5C     | -0.811950633 |
| 7,579 | MST1R     | -0.81188025  |
| 7,580 | MGC4796   | -0.811821807 |
| 7,581 | MGC16309  | -0.811569213 |
| 7,582 | C20ORF26  | -0.811432419 |
| 7,583 | C20ORF26  | -0.811432419 |
| 7,584 | ITGB1     | -0.811319629 |
| 7,585 | STX16     | -0.811307052 |
| 7,586 | NET-7     | -0.811283567 |
| 7,587 | SLC27A4   | -0.811246979 |
| 7,588 | CCNE2     | -0.811175222 |
| 7,589 | ALMS1     | -0.811127402 |
| 7,590 | C2ORF18   | -0.811083164 |
| 7,591 | GUCY1B3   | -0.810924237 |
| 7,592 | MTX2      | -0.810845686 |
| 7,593 | MRPS18C   | -0.810774183 |
| 7,594 | SHC2      | -0.810749026 |
| 7,595 | ATG4B     | -0.810742433 |
| 7,596 | BPY2C     | -0.810603515 |
| 7,597 | SERPINA13 | -0.810179896 |
| 7,598 | GALNT8    | -0.810098089 |
| 7,599 | SERPINB9  | -0.809941163 |
| 7,600 | MGC26647  | -0.809755047 |
| 7,601 | SLC25A16  | -0.809697297 |
| 7,602 | FLNB      | -0.809644098 |
| 7,603 | MFGE8     | -0.809448174 |
| 7,604 | KLHDC1    | -0.809300329 |
| 7,605 | APOBEC3A  | -0.809209557 |

|       |                     |              |
|-------|---------------------|--------------|
| 7,606 | <i>OLFML2B</i>      | -0.808953946 |
| 7,607 | <i>FLJ13725</i>     | -0.808883169 |
| 7,608 | <i>MAT2A</i>        | -0.808605708 |
| 7,609 | <i>FLJ23469</i>     | -0.808097641 |
| 7,610 | <i>OR5AU1</i>       | -0.808064001 |
| 7,611 | <i>CSEN</i>         | -0.807854748 |
| 7,612 | <i>C3F</i>          | -0.80781046  |
| 7,613 | <i>DKFZP7790175</i> | -0.807660948 |
| 7,614 | <i>LOC146853</i>    | -0.807611625 |
| 7,615 | <i>MGC44903</i>     | -0.807607342 |
| 7,616 | <i>CGI-41</i>       | -0.807517495 |
| 7,617 | <i>RASA2</i>        | -0.807416851 |
| 7,618 | <i>FHOD1</i>        | -0.8072863   |
| 7,619 | <i>C1ORF25</i>      | -0.806587965 |
| 7,620 | <i>LOC130576</i>    | -0.806574544 |
| 7,621 | <i>LPP</i>          | -0.806557593 |
| 7,622 | <i>C9</i>           | -0.806489442 |
| 7,623 | <i>NAP1L3</i>       | -0.806382452 |
| 7,624 | <i>SOD1</i>         | -0.806182843 |
| 7,625 | <i>SH2D4B</i>       | -0.806022117 |
| 7,626 | <i>KIAA1971</i>     | -0.806004559 |
| 7,627 | <i>ENPP2</i>        | -0.805849889 |
| 7,628 | <i>FLJ35630</i>     | -0.80584683  |
| 7,629 | <i>RAB41</i>        | -0.805709231 |
| 7,630 | <i>CSRP2</i>        | -0.80569869  |
| 7,631 | <i>TAF7</i>         | -0.805655098 |
| 7,632 | <i>SERAC1</i>       | -0.805481797 |
| 7,633 | <i>TMEM5</i>        | -0.805452774 |
| 7,634 | <i>RAB39B</i>       | -0.805393543 |
| 7,635 | <i>PCGF3</i>        | -0.804966867 |
| 7,636 | <i>PEX16</i>        | -0.804683664 |
| 7,637 | <i>BNIP1</i>        | -0.804596204 |
| 7,638 | <i>EGFL8</i>        | -0.804508846 |
| 7,639 | <i>SLC37A4</i>      | -0.804457069 |
| 7,640 | <i>BITE</i>         | -0.804243593 |
| 7,641 | <i>CTDSPL</i>       | -0.804225026 |
| 7,642 | <i>FLJ11127</i>     | -0.804224194 |
| 7,643 | <i>PARD3</i>        | -0.804183553 |
| 7,644 | <i>SULT2B1</i>      | -0.804155563 |
| 7,645 | <i>FLJ33814</i>     | -0.803733966 |
| 7,646 | <i>DT1P1A10</i>     | -0.803565534 |
| 7,647 | <i>SLC25A37</i>     | -0.80349003  |
| 7,648 | <i>UBA2</i>         | -0.80348564  |
| 7,649 | <i>LOC90321</i>     | -0.803418214 |
| 7,650 | <i>SHPRH</i>        | -0.803396165 |
| 7,651 | <i>MGC40107</i>     | -0.8033237   |
| 7,652 | <i>DEFB123</i>      | -0.803249308 |

|       |           |              |
|-------|-----------|--------------|
| 7,653 | TRIM50A   | -0.80293421  |
| 7,654 | C10ORF104 | -0.802685988 |
| 7,655 | HSPC117   | -0.802607286 |
| 7,656 | FLJ21908  | -0.802369021 |
| 7,657 | KIAA1238  | -0.801861893 |
| 7,658 | MRPL23    | -0.80170609  |
| 7,659 | CYP26A1   | -0.80164047  |
| 7,660 | RNF13     | -0.801594923 |
| 7,661 | ZNF549    | -0.801399568 |
| 7,662 | SMAD4     | -0.801392076 |
| 7,663 | SLITRK6   | -0.801377824 |
| 7,664 | RNUT1     | -0.80086059  |
| 7,665 | DDX23     | -0.800741658 |
| 7,666 | DC-UBP    | -0.800603792 |
| 7,667 | HCLS1     | -0.800457896 |
| 7,668 | FLJ90650  | -0.800402709 |
| 7,669 | CTAG3     | -0.800096205 |
| 7,670 | CDH3      | -0.800039067 |
| 7,671 | TOP2B     | -0.799984289 |
| 7,672 | LOC340061 | -0.799613572 |
| 7,673 | LYZL6     | -0.799508131 |
| 7,674 | ZAN       | -0.799493078 |
| 7,675 | LOC201158 | -0.799303537 |
| 7,676 | CPT1A     | -0.799264361 |
| 7,677 | MGC10198  | -0.799062857 |
| 7,678 | BTNL2     | -0.798995359 |
| 7,679 | HIST1H4F  | -0.798465643 |
| 7,680 | BSN       | -0.79840149  |
| 7,681 | LUZP1     | -0.798352164 |
| 7,682 | FUS       | -0.797986034 |
| 7,683 | HSPE1     | -0.797965447 |
| 7,684 | ELF3      | -0.797930252 |
| 7,685 | USP2      | -0.797783696 |
| 7,686 | IRAK4     | -0.797699812 |
| 7,687 | C10RF37   | -0.797663741 |
| 7,688 | CD6       | -0.797548149 |
| 7,689 | CXXC1     | -0.797546463 |
| 7,690 | RALA      | -0.797370589 |
| 7,691 | SLC22A18  | -0.797240912 |
| 7,692 | OR51S1    | -0.796831521 |
| 7,693 | DNAJA1    | -0.79683021  |
| 7,694 | DCUN1D2   | -0.79682378  |
| 7,695 | DRF1      | -0.796685214 |
| 7,696 | LOC392395 | -0.796520864 |
| 7,697 | ZNF367    | -0.796474692 |
| 7,698 | FLJ20514  | -0.796453797 |
| 7,699 | UBE2L6    | -0.796396472 |

|       |           |              |
|-------|-----------|--------------|
| 7,700 | FLJ22875  | -0.796187254 |
| 7,701 | IL8RB     | -0.795998186 |
| 7,702 | SAS       | -0.795978906 |
| 7,703 | CXCR6     | -0.795833086 |
| 7,704 | ATP5E     | -0.795636121 |
| 7,705 | FGF2      | -0.795406978 |
| 7,706 | HIP1R     | -0.795102372 |
| 7,707 | MGC14560  | -0.794891931 |
| 7,708 | ADD1      | -0.794878391 |
| 7,709 | LOC153364 | -0.794821426 |
| 7,710 | C20ORF155 | -0.794764483 |
| 7,711 | OR5A1     | -0.794761761 |
| 7,712 | C6ORF108  | -0.794750626 |
| 7,713 | BAGE2     | -0.794297026 |
| 7,714 | SULT2B1   | -0.794209284 |
| 7,715 | NFYC      | -0.794110338 |
| 7,716 | THAP11    | -0.793984282 |
| 7,717 | ZDHHC7    | -0.793951195 |
| 7,718 | TPP2      | -0.793865814 |
| 7,719 | SCFD1     | -0.793838247 |
| 7,720 | IFNA2     | -0.793783505 |
| 7,721 | CXORF12   | -0.793590848 |
| 7,722 | LOC139135 | -0.79358357  |
| 7,723 | CDC37     | -0.793520263 |
| 7,724 | PIK3C2G   | -0.793406285 |
| 7,725 | KIAA0317  | -0.793405311 |
| 7,726 | FLJ38596  | -0.79309315  |
| 7,727 | RPL9      | -0.792899139 |
| 7,728 | NHLH2     | -0.792860197 |
| 7,729 | BCL2L13   | -0.792844287 |
| 7,730 | BUB3      | -0.792778587 |
| 7,731 | BAGE5     | -0.792737512 |
| 7,732 | PTPRH     | -0.792655023 |
| 7,733 | PDLIM4    | -0.792605121 |
| 7,734 | B3GNT3    | -0.792556827 |
| 7,735 | RARB      | -0.7924288   |
| 7,736 | ARF5      | -0.792019863 |
| 7,737 | C20ORF121 | -0.791998736 |
| 7,738 | C20ORF4   | -0.791966498 |
| 7,739 | KCTD7     | -0.79194534  |
| 7,740 | LRRC17    | -0.791854273 |
| 7,741 | RIN3      | -0.791748502 |
| 7,742 | CTCFL     | -0.791712822 |
| 7,743 | RDH11     | -0.791502095 |
| 7,744 | C19ORF7   | -0.79119726  |
| 7,745 | TMEM8     | -0.791002946 |
| 7,746 | LY6G5C    | -0.790916987 |

|       |           |              |
|-------|-----------|--------------|
| 7,747 | COMMD8    | -0.790845168 |
| 7,748 | STAP2     | -0.790821194 |
| 7,749 | HEMK1     | -0.790808992 |
| 7,750 | KIAA1018  | -0.79059017  |
| 7,751 | CACNA2D3  | -0.790567003 |
| 7,752 | C10ORF9   | -0.790534119 |
| 7,753 | WASL      | -0.790297641 |
| 7,754 | RPS4Y1    | -0.790278523 |
| 7,755 | TRPV5     | -0.790264838 |
| 7,756 | TAC4      | -0.789949331 |
| 7,757 | CPNE4     | -0.789518174 |
| 7,758 | VPS18     | -0.789243858 |
| 7,759 | MED25     | -0.789190714 |
| 7,760 | NUMBL     | -0.788647766 |
| 7,761 | AQP10     | -0.788532846 |
| 7,762 | TXNDC3    | -0.788488474 |
| 7,763 | SLC6A19   | -0.788484174 |
| 7,764 | JPH4      | -0.788438691 |
| 7,765 | FLJ10726  | -0.788434883 |
| 7,766 | BTRC      | -0.788013686 |
| 7,767 | LOC401546 | -0.787981578 |
| 7,768 | SDC1      | -0.787698862 |
| 7,769 | C1R       | -0.787513028 |
| 7,770 | MTHFS     | -0.787461273 |
| 7,771 | SMARCC2   | -0.787325706 |
| 7,772 | EPB41L2   | -0.787273244 |
| 7,773 | PDYN      | -0.787037307 |
| 7,774 | LOC89894  | -0.787023332 |
| 7,775 | SERPINF2  | -0.786884342 |
| 7,776 | DENR      | -0.786852579 |
| 7,777 | IL5RA     | -0.78684426  |
| 7,778 | PLOD2     | -0.78681988  |
| 7,779 | KIAA1052  | -0.786763185 |
| 7,780 | APOC3     | -0.786649569 |
| 7,781 | SETDB1    | -0.786624472 |
| 7,782 | CSMD2     | -0.786623772 |
| 7,783 | B3GALT7   | -0.78653004  |
| 7,784 | RPL22     | -0.786505331 |
| 7,785 | SLC12A4   | -0.786419714 |
| 7,786 | SEMA3F    | -0.786140802 |
| 7,787 | LOC441376 | -0.786008324 |
| 7,788 | LEP17     | -0.785982915 |
| 7,789 | FLJ36674  | -0.785760099 |
| 7,790 | IGF2AS    | -0.785732559 |
| 7,791 | GBP2      | -0.785510894 |
| 7,792 | CA5B      | -0.785443373 |
| 7,793 | C10ORF70  | -0.785352024 |

|       |               |              |
|-------|---------------|--------------|
| 7,794 | GNLY          | -0.785187251 |
| 7,795 | GPM6A         | -0.785160309 |
| 7,796 | CRYGD         | -0.78511025  |
| 7,797 | DKFZP547B1713 | -0.78493597  |
| 7,798 | FOXJ1         | -0.784711988 |
| 7,799 | OR6B3         | -0.784444009 |
| 7,800 | NUDT1         | -0.784411688 |
| 7,801 | HOXB5         | -0.784154056 |
| 7,802 | C14ORF114     | -0.784123661 |
| 7,803 | TRIM44        | -0.784100167 |
| 7,804 | PCDHA3        | -0.783877478 |
| 7,805 | LOC339168     | -0.783751802 |
| 7,806 | ZC3HDC7       | -0.783708243 |
| 7,807 | OIP106        | -0.783522468 |
| 7,808 | GABRE         | -0.783433243 |
| 7,809 | C20ORF136     | -0.783342065 |
| 7,810 | C10ORF55      | -0.782753344 |
| 7,811 | LOC374920     | -0.782545111 |
| 7,812 | THSD1         | -0.782219166 |
| 7,813 | RGS14         | -0.782022047 |
| 7,814 | FLJ25467      | -0.782008269 |
| 7,815 | DIP13B        | -0.781960525 |
| 7,816 | PLEKHF2       | -0.78190886  |
| 7,817 | DIBD1         | -0.781906137 |
| 7,818 | VASP          | -0.781823233 |
| 7,819 | FLJ20364      | -0.781749306 |
| 7,820 | DBC1          | -0.781565528 |
| 7,821 | FBXL16        | -0.781012083 |
| 7,822 | MDN1          | -0.780985867 |
| 7,823 | HSPB6         | -0.780942863 |
| 7,824 | RRAD          | -0.780761547 |
| 7,825 | FLJ23191      | -0.780722104 |
| 7,826 | UCHL5         | -0.780562676 |
| 7,827 | DBCCR1L       | -0.780467781 |
| 7,828 | MMP10         | -0.78032803  |
| 7,829 | DR1           | -0.780112543 |
| 7,830 | HS3ST3B1      | -0.780043527 |
| 7,831 | SDCCAG3       | -0.780024444 |
| 7,832 | STK32A        | -0.780024245 |
| 7,833 | FLT3LG        | -0.779900054 |
| 7,834 | BSCL2         | -0.779890723 |
| 7,835 | FLJ25323      | -0.779888839 |
| 7,836 | MGC5576       | -0.779646898 |
| 7,837 | KIF21A        | -0.77961353  |
| 7,838 | RFX4          | -0.779376718 |
| 7,839 | SURF1         | -0.779247853 |
| 7,840 | UNC119        | -0.77913319  |

|       |              |              |
|-------|--------------|--------------|
| 7,841 | ACTL7B       | -0.779110424 |
| 7,842 | DKFZP564J157 | -0.778836688 |
| 7,843 | NT5M         | -0.778812441 |
| 7,844 | SLC2A14      | -0.778754831 |
| 7,845 | FBXL3P       | -0.778678216 |
| 7,846 | SPFH2        | -0.778642556 |
| 7,847 | EYA3         | -0.778602687 |
| 7,848 | FAM9B        | -0.778541709 |
| 7,849 | CUL4B        | -0.778449509 |
| 7,850 | C14ORF29     | -0.778224882 |
| 7,851 | DHRX         | -0.778147085 |
| 7,852 | NOP5/NOP58   | -0.778082906 |
| 7,853 | COBLL1       | -0.777663242 |
| 7,854 | HAO2         | -0.777616286 |
| 7,855 | KLK2         | -0.777566222 |
| 7,856 | FLJ22965     | -0.777380577 |
| 7,857 | DNAJC3       | -0.777367378 |
| 7,858 | MDS009       | -0.777275684 |
| 7,859 | RUNX1        | -0.776976269 |
| 7,860 | MET          | -0.776864457 |
| 7,861 | TRPA1        | -0.77668646  |
| 7,862 | C6ORF10      | -0.776667464 |
| 7,863 | MGC4170      | -0.77636173  |
| 7,864 | TK2          | -0.77624034  |
| 7,865 | ITGA3        | -0.776219382 |
| 7,866 | LOC90799     | -0.775992197 |
| 7,867 | RASA3        | -0.77597267  |
| 7,868 | C9ORF52      | -0.7759437   |
| 7,869 | PPARGC1A     | -0.775887176 |
| 7,870 | SC65         | -0.775758038 |
| 7,871 | C22ORF11     | -0.775609914 |
| 7,872 | DPF1         | -0.775599637 |
| 7,873 | NNT          | -0.775383623 |
| 7,874 | PKHD1L1      | -0.775294446 |
| 7,875 | KIAA1318     | -0.775292878 |
| 7,876 | KRTAP13-3    | -0.774977915 |
| 7,877 | GRK6         | -0.774922169 |
| 7,878 | TRAF3        | -0.774838831 |
| 7,879 | MMP12        | -0.774786718 |
| 7,880 | PANK2        | -0.774569743 |
| 7,881 | FEZL         | -0.774531303 |
| 7,882 | PKD1L1       | -0.774410126 |
| 7,883 | OR2A1        | -0.774331885 |
| 7,884 | GPR112       | -0.774227735 |
| 7,885 | HS6ST3       | -0.774204619 |
| 7,886 | ATP5G2       | -0.773875766 |
| 7,887 | TRPM6        | -0.773823798 |



|       |            |              |
|-------|------------|--------------|
| 7,888 | BEAN       | -0.773818959 |
| 7,889 | F3         | -0.773639898 |
| 7,890 | CASP9      | -0.773610924 |
| 7,891 | PDZK11     | -0.773596491 |
| 7,892 | CABC1      | -0.773543818 |
| 7,893 | WRAP53     | -0.773472146 |
| 7,894 | GRPEL1     | -0.773462284 |
| 7,895 | SCML4      | -0.773350922 |
| 7,896 | OR5K1      | -0.773184525 |
| 7,897 | RAI16      | -0.77314938  |
| 7,898 | LOC120237  | -0.773083428 |
| 7,899 | SPRYD5     | -0.773069792 |
| 7,900 | MAPRE3     | -0.773032594 |
| 7,901 | FLJ38615   | -0.772989017 |
| 7,902 | C20ORF31   | -0.772793204 |
| 7,903 | FLJ35775   | -0.772686394 |
| 7,904 | ST6GALNAC5 | -0.772626847 |
| 7,905 | PNUTL2     | -0.771802436 |
| 7,906 | FN3KRP     | -0.771800536 |
| 7,907 | TMC7       | -0.771638043 |
| 7,908 | LACTB      | -0.771557084 |
| 7,909 | C10ORF89   | -0.771310729 |
| 7,910 | TRAF7      | -0.771234699 |
| 7,911 | DHPS       | -0.771120521 |
| 7,912 | EGR1       | -0.770953431 |
| 7,913 | KLHL7      | -0.770949864 |
| 7,914 | TBC1D8     | -0.770772738 |
| 7,915 | DSCR1L2    | -0.770742239 |
| 7,916 | PRV1       | -0.770686137 |
| 7,917 | CASK       | -0.770625407 |
| 7,918 | NUFIP1     | -0.770421153 |
| 7,919 | TPTE2      | -0.770407844 |
| 7,920 | CYB561D1   | -0.770329634 |
| 7,921 | TP53       | -0.770123237 |
| 7,922 | PSMD4      | -0.770048625 |
| 7,923 | MIB1       | -0.770037155 |
| 7,924 | CYC1       | -0.769830514 |
| 7,925 | KCNJ12     | -0.769704055 |
| 7,926 | HRH4       | -0.76956239  |
| 7,927 | C20ORF17   | -0.769552831 |
| 7,928 | HTR3B      | -0.769518844 |
| 7,929 | SPON1      | -0.769466618 |
| 7,930 | ERBB2IP    | -0.769250062 |
| 7,931 | PTPRA      | -0.769169294 |
| 7,932 | JRK        | -0.768954957 |
| 7,933 | RPIA       | -0.768709697 |
| 7,934 | PIWIL4     | -0.768666125 |

|       |           |              |
|-------|-----------|--------------|
| 7,935 | POMT2     | -0.768549306 |
| 7,936 | F11R      | -0.768514797 |
| 7,937 | HEBP2     | -0.76830499  |
| 7,938 | TOM1L1    | -0.768292773 |
| 7,939 | MYST4     | -0.767858211 |
| 7,940 | APOBEC1   | -0.766952987 |
| 7,941 | NKX6-1    | -0.766869897 |
| 7,942 | RECQL5    | -0.766833075 |
| 7,943 | DSC3      | -0.766825937 |
| 7,944 | RTCD1     | -0.766798641 |
| 7,945 | CRADD     | -0.766744124 |
| 7,946 | C19ORF26  | -0.766604942 |
| 7,947 | EPB41L3   | -0.766540451 |
| 7,948 | GPR41     | -0.766528081 |
| 7,949 | ARPC1A    | -0.766415018 |
| 7,950 | SDCCAG10  | -0.766365422 |
| 7,951 | MGC14288  | -0.766315857 |
| 7,952 | CDC25B    | -0.765813449 |
| 7,953 | CBR3      | -0.765660629 |
| 7,954 | TAF5L     | -0.765396801 |
| 7,955 | TBC1D16   | -0.765229031 |
| 7,956 | FLJ20581  | -0.765124522 |
| 7,957 | PHGDH     | -0.765098956 |
| 7,958 | FAM57A    | -0.765070135 |
| 7,959 | PLCL4     | -0.764981772 |
| 7,960 | CDADC1    | -0.764977667 |
| 7,961 | HEY1      | -0.764839321 |
| 7,962 | FLJ22938  | -0.764767315 |
| 7,963 | GALK1     | -0.7645853   |
| 7,964 | LOC114659 | -0.76453615  |
| 7,965 | C9ORF95   | -0.764420215 |
| 7,966 | OR5M10    | -0.764355    |
| 7,967 | EED       | -0.764114953 |
| 7,968 | LOC441476 | -0.764013672 |
| 7,969 | FLJ45850  | -0.764008422 |
| 7,970 | PHKG2     | -0.76395947  |
| 7,971 | ADORA3    | -0.763893989 |
| 7,972 | CIB1      | -0.76381612  |
| 7,973 | CUL1      | -0.763493707 |
| 7,974 | SLC37A3   | -0.763444755 |
| 7,975 | NES       | -0.763305783 |
| 7,976 | RARA      | -0.763212317 |
| 7,977 | RPS6KA5   | -0.763155967 |
| 7,978 | ACPP      | -0.763145735 |
| 7,979 | ATP13A    | -0.763096249 |
| 7,980 | TPR       | -0.763066677 |
| 7,981 | RPUSD2    | -0.762848978 |

|       |           |              |
|-------|-----------|--------------|
| 7,982 | CDA       | -0.762839682 |
| 7,983 | KIAA1128  | -0.762782628 |
| 7,984 | NSFL1C    | -0.762685929 |
| 7,985 | FLJ10201  | -0.762670032 |
| 7,986 | DAXX      | -0.762553534 |
| 7,987 | FLJ12949  | -0.76238037  |
| 7,988 | OR52N5    | -0.76235238  |
| 7,989 | LOC399947 | -0.761982471 |
| 7,990 | DUSP13    | -0.761960085 |
| 7,991 | GP9       | -0.76190877  |
| 7,992 | ENG       | -0.761707929 |
| 7,993 | NYD-SP12  | -0.761667159 |
| 7,994 | C15ORF15  | -0.761559578 |
| 7,995 | RBMY1A1   | -0.76150341  |
| 7,996 | TSLP      | -0.760993453 |
| 7,997 | PFKFB4    | -0.760975238 |
| 7,998 | ADAMTS2   | -0.760885368 |
| 7,999 | HDGFRP3   | -0.760836792 |
| 8,000 | ZNF501    | -0.760805634 |
| 8,001 | RPS4Y2    | -0.760797835 |
| 8,002 | MINA      | -0.760650536 |
| 8,003 | CDKN1C    | -0.760578742 |
| 8,004 | MGC8721   | -0.760492748 |
| 8,005 | ILVBL     | -0.760447895 |
| 8,006 | DHX33     | -0.760343748 |
| 8,007 | RGS21     | -0.760288185 |
| 8,008 | TNFRSF21  | -0.760253599 |
| 8,009 | CRYL1     | -0.760181186 |
| 8,010 | SCN3B     | -0.759935743 |
| 8,011 | DIA1      | -0.759902654 |
| 8,012 | LOC148898 | -0.759843794 |
| 8,013 | MGC46719  | -0.759716224 |
| 8,014 | PPIL5     | -0.759625216 |
| 8,015 | USP48     | -0.759583032 |
| 8,016 | CD97      | -0.75953483  |
| 8,017 | ALDRL6    | -0.759520234 |
| 8,018 | ARX       | -0.75950317  |
| 8,019 | PON3      | -0.759455072 |
| 8,020 | CDK10     | -0.759449788 |
| 8,021 | RAB2B     | -0.759447548 |
| 8,022 | FRMD4     | -0.759380939 |
| 8,023 | FLJ33620  | -0.759187133 |
| 8,024 | LOC442726 | -0.759124096 |
| 8,025 | FLJ35119  | -0.759082464 |
| 8,026 | MYNN      | -0.758708913 |
| 8,027 | OBP2B     | -0.758503161 |
| 8,028 | LOC51693  | -0.758407992 |

|       |                     |              |
|-------|---------------------|--------------|
| 8,029 | <i>PRKCN</i>        | -0.758366256 |
| 8,030 | <i>HSPBP1</i>       | -0.758025587 |
| 8,031 | <i>BRI3BP</i>       | -0.757991734 |
| 8,032 | <i>JM11</i>         | -0.75781515  |
| 8,033 | <i>GPR146</i>       | -0.757788759 |
| 8,034 | <i>FPR1</i>         | -0.757665773 |
| 8,035 | <i>THOC2</i>        | -0.757644944 |
| 8,036 | <i>ANAPC2</i>       | -0.757563687 |
| 8,037 | <i>MGC49942</i>     | -0.757557472 |
| 8,038 | <i>FLJ20489</i>     | -0.757468735 |
| 8,039 | <i>RYR1</i>         | -0.757269298 |
| 8,040 | <i>RNF149</i>       | -0.757205211 |
| 8,041 | <i>GCAT</i>         | -0.757186668 |
| 8,042 | <i>RNF17</i>        | -0.757186052 |
| 8,043 | <i>MGC7036</i>      | -0.757001659 |
| 8,044 | <i>KIRREL</i>       | -0.756969728 |
| 8,045 | <i>MRPL22</i>       | -0.756964421 |
| 8,046 | <i>RAB38</i>        | -0.756852111 |
| 8,047 | <i>FGF21</i>        | -0.756779975 |
| 8,048 | <i>HIPK2</i>        | -0.756748048 |
| 8,049 | <i>KIAA0774</i>     | -0.756725166 |
| 8,050 | <i>KCNK12</i>       | -0.756715514 |
| 8,051 | <i>DKFZP434J154</i> | -0.756664971 |
| 8,052 | <i>MAGMAS</i>       | -0.756548877 |
| 8,053 | <i>VPS13A</i>       | -0.756245507 |
| 8,054 | <i>CCNB2</i>        | -0.756157902 |
| 8,055 | <i>SCAND1</i>       | -0.756147141 |
| 8,056 | <i>GART</i>         | -0.756075177 |
| 8,057 | <i>C14ORF35</i>     | -0.755870775 |
| 8,058 | <i>C6ORF194</i>     | -0.755650517 |
| 8,059 | <i>FY</i>           | -0.755634492 |
| 8,060 | <i>LLGL1</i>        | -0.755384281 |
| 8,061 | <i>TRIP6</i>        | -0.75537776  |
| 8,062 | <i>PLEKHA1</i>      | -0.755221653 |
| 8,063 | <i>LOC643904</i>    | -0.755097985 |
| 8,064 | <i>LOC286257</i>    | -0.755072608 |
| 8,065 | <i>ENPP6</i>        | -0.754758039 |
| 8,066 | <i>CENPC1</i>       | -0.754687579 |
| 8,067 | <i>RNF175</i>       | -0.7546645   |
| 8,068 | <i>SLC25A4</i>      | -0.75466176  |
| 8,069 | <i>THSD6</i>        | -0.754495343 |
| 8,070 | <i>CDK5R1</i>       | -0.754409803 |
| 8,071 | <i>CDAN1</i>        | -0.75440492  |
| 8,072 | <i>MGC15396</i>     | -0.754272536 |
| 8,073 | <i>CAND2</i>        | -0.754092917 |
| 8,074 | <i>VNN3</i>         | -0.754030488 |
| 8,075 | <i>SCRN1</i>        | -0.753657861 |

|       |                      |              |
|-------|----------------------|--------------|
| 8,076 | <i>FLJ22938</i>      | -0.753563838 |
| 8,077 | <i>TRG20</i>         | -0.753257735 |
| 8,078 | <i>FLJ35695</i>      | -0.753090522 |
| 8,079 | <i>CLLU1</i>         | -0.75307216  |
| 8,080 | <i>POLR1A</i>        | -0.752988249 |
| 8,081 | <i>FAM149B1</i>      | -0.752883254 |
| 8,082 | <i>CPA4</i>          | -0.75287974  |
| 8,083 | <i>HCN2</i>          | -0.752845135 |
| 8,084 | <i>LY6G5B</i>        | -0.752765148 |
| 8,085 | <i>BDKRB1</i>        | -0.752746322 |
| 8,086 | <i>LOC91526</i>      | -0.752662704 |
| 8,087 | <i>IFITM3</i>        | -0.752510778 |
| 8,088 | <i>SLCO4C1</i>       | -0.752499861 |
| 8,089 | <i>RNF128</i>        | -0.752327838 |
| 8,090 | <i>ARSF</i>          | -0.752320709 |
| 8,091 | <i>IL13RA2</i>       | -0.752304361 |
| 8,092 | <i>OR2H3</i>         | -0.752215577 |
| 8,093 | <i>AUTS2</i>         | -0.752067514 |
| 8,094 | <i>C6ORF79</i>       | -0.751993605 |
| 8,095 | <i>HEYL</i>          | -0.75175579  |
| 8,096 | <i>FLJ44299</i>      | -0.751725876 |
| 8,097 | <i>FLJ39501</i>      | -0.751659432 |
| 8,098 | <i>SLC25A1</i>       | -0.751489467 |
| 8,099 | <i>SULF1</i>         | -0.751317301 |
| 8,100 | <i>KCNMB3</i>        | -0.751161981 |
| 8,101 | <i>FLJ11323</i>      | -0.751152271 |
| 8,102 | <i>PPP2R2C</i>       | -0.751046202 |
| 8,103 | <i>C20ORF13</i>      | -0.750995095 |
| 8,104 | <i>DKFZP586P0123</i> | -0.75094569  |
| 8,105 | <i>WDRX1</i>         | -0.750759992 |
| 8,106 | <i>LOC220416</i>     | -0.750758441 |
| 8,107 | <i>HLA-DQA2</i>      | -0.750730314 |
| 8,108 | <i>ZNF398</i>        | -0.750662542 |
| 8,109 | <i>FLJ46082</i>      | -0.750619093 |
| 8,110 | <i>DKFZP564J102</i>  | -0.750393983 |
| 8,111 | <i>NR1D1</i>         | -0.750235963 |
| 8,112 | <i>CAPN6</i>         | -0.750234305 |
| 8,113 | <i>NPHP1</i>         | -0.750221782 |
| 8,114 | <i>TAS2R45</i>       | -0.750117006 |
| 8,115 | <i>MASA</i>          | -0.749774754 |
| 8,116 | <i>PLSCR1</i>        | -0.749627585 |
| 8,117 | <i>MGC15397</i>      | -0.749608243 |
| 8,118 | <i>PDZK1P1</i>       | -0.749402181 |
| 8,119 | <i>ADRA2C</i>        | -0.749056733 |
| 8,120 | <i>HYDIN</i>         | -0.748678841 |
| 8,121 | <i>CD58</i>          | -0.748424926 |
| 8,122 | <i>SERHL</i>         | -0.748290999 |

|       |               |              |
|-------|---------------|--------------|
| 8,123 | AS3MT         | -0.74826685  |
| 8,124 | ATOH8         | -0.748100323 |
| 8,125 | SPG3A         | -0.747709713 |
| 8,126 | SLC43A3       | -0.747702698 |
| 8,127 | DKFZP686L1814 | -0.747555118 |
| 8,128 | MAGED2        | -0.747494791 |
| 8,129 | FBXO18        | -0.747337709 |
| 8,130 | ADCY2         | -0.747334414 |
| 8,131 | SUGT1         | -0.74716203  |
| 8,132 | LOC388799     | -0.747136659 |
| 8,133 | KIAA0514      | -0.74706847  |
| 8,134 | LOC391723     | -0.746815559 |
| 8,135 | PRSS3         | -0.746617802 |
| 8,136 | AHSG          | -0.74660939  |
| 8,137 | CBS           | -0.746442147 |
| 8,138 | INPP5D        | -0.746438274 |
| 8,139 | C10ORF32      | -0.746429525 |
| 8,140 | ATP7A         | -0.74631514  |
| 8,141 | CDK2AP1       | -0.746313561 |
| 8,142 | APOBEC2       | -0.746242365 |
| 8,143 | LOC283537     | -0.746217758 |
| 8,144 | TRIM39        | -0.746017705 |
| 8,145 | UBE2U         | -0.745974053 |
| 8,146 | FLJ14442      | -0.745855311 |
| 8,147 | ELN           | -0.74575968  |
| 8,148 | TCF15         | -0.745659676 |
| 8,149 | FLJ13946      | -0.745356571 |
| 8,150 | STIP1         | -0.74533447  |
| 8,151 | FLJ46266      | -0.745319202 |
| 8,152 | SH3BP5        | -0.745264512 |
| 8,153 | GSH1          | -0.745043721 |
| 8,154 | SRCAP         | -0.744999755 |
| 8,155 | KRT7          | -0.744907878 |
| 8,156 | JIK           | -0.744894843 |
| 8,157 | LOC345651     | -0.744858266 |
| 8,158 | SPY1          | -0.744624471 |
| 8,159 | CTNND2        | -0.744581027 |
| 8,160 | KIF2C         | -0.74443049  |
| 8,161 | SCUBE2        | -0.744414956 |
| 8,162 | ADAM17        | -0.744212175 |
| 8,163 | ACF           | -0.74416911  |
| 8,164 | LOC124411     | -0.74383436  |
| 8,165 | UNKL          | -0.743674345 |
| 8,166 | SUPT4H1       | -0.743654976 |
| 8,167 | PROC          | -0.743637783 |
| 8,168 | CYP2D6        | -0.743440362 |
| 8,169 | MAGEA2B       | -0.743435637 |

|       |                  |              |
|-------|------------------|--------------|
| 8,170 | <i>DLEU7</i>     | -0.743207817 |
| 8,171 | <i>MGC39662</i>  | -0.743118924 |
| 8,172 | <i>HPS3</i>      | -0.743063126 |
| 8,173 | <i>ICAM3</i>     | -0.742927548 |
| 8,174 | <i>NPM2</i>      | -0.742914243 |
| 8,175 | <i>ADAM8</i>     | -0.742834134 |
| 8,176 | <i>TBC1D1</i>    | -0.74278233  |
| 8,177 | <i>BPY2IP1</i>   | -0.742751819 |
| 8,178 | <i>PCDHGA12</i>  | -0.742742056 |
| 8,179 | <i>ADH1C</i>     | -0.742689641 |
| 8,180 | <i>STARD5</i>    | -0.742580856 |
| 8,181 | <i>FLJ12644</i>  | -0.742517292 |
| 8,182 | <i>FOXL2</i>     | -0.742451702 |
| 8,183 | <i>FLJ38973</i>  | -0.742080324 |
| 8,184 | <i>MIA2</i>      | -0.741851152 |
| 8,185 | <i>APTX</i>      | -0.741758357 |
| 8,186 | <i>BTBD11</i>    | -0.741596963 |
| 8,187 | <i>KIAA0746</i>  | -0.741567823 |
| 8,188 | <i>ZFP90</i>     | -0.741555526 |
| 8,189 | <i>MUC17</i>     | -0.741382591 |
| 8,190 | <i>FLJ22405</i>  | -0.741328595 |
| 8,191 | <i>MXRA8</i>     | -0.741278094 |
| 8,192 | <i>PSMA7</i>     | -0.741226837 |
| 8,193 | <i>C6orf174</i>  | -0.741100863 |
| 8,194 | <i>LOC119710</i> | -0.740694509 |
| 8,195 | <i>CRR9</i>      | -0.740694509 |
| 8,196 | <i>ZNF511</i>    | -0.74065982  |
| 8,197 | <i>HINT2</i>     | -0.74058304  |
| 8,198 | <i>RPL39L</i>    | -0.740503878 |
| 8,199 | <i>FLJ16139</i>  | -0.740194082 |
| 8,200 | <i>IGSF4C</i>    | -0.74008499  |
| 8,201 | <i>UBP1</i>      | -0.739997917 |
| 8,202 | <i>CYP1B1</i>    | -0.73999217  |
| 8,203 | <i>FLJ20628</i>  | -0.739713245 |
| 8,204 | <i>MAOB</i>      | -0.739695169 |
| 8,205 | <i>PDCD2</i>     | -0.739475605 |
| 8,206 | <i>ZNF92</i>     | -0.739370888 |
| 8,207 | <i>PDGFB</i>     | -0.739135189 |
| 8,208 | <i>KCNE3</i>     | -0.739098058 |
| 8,209 | <i>SLC26A7</i>   | -0.739094113 |
| 8,210 | <i>LOC51334</i>  | -0.739019887 |
| 8,211 | <i>CPXM2</i>     | -0.738838034 |
| 8,212 | <i>ANP32B</i>    | -0.738827547 |
| 8,213 | <i>DC2</i>       | -0.738632085 |
| 8,214 | <i>CDC14A</i>    | -0.738015106 |
| 8,215 | <i>CRSP9</i>     | -0.737913944 |
| 8,216 | <i>SEC24D</i>    | -0.737842176 |

|       |               |              |
|-------|---------------|--------------|
| 8,217 | FLJ21742      | -0.73769681  |
| 8,218 | DKFZP564G2022 | -0.73769132  |
| 8,219 | PRPF8         | -0.737293926 |
| 8,220 | ZAP128        | -0.737117293 |
| 8,221 | RP13-15M17.2  | -0.736985586 |
| 8,222 | WDHD1         | -0.736975292 |
| 8,223 | TACC3         | -0.736965413 |
| 8,224 | FADD          | -0.736566491 |
| 8,225 | LOC164045     | -0.736549274 |
| 8,226 | KIAA1627      | -0.73651446  |
| 8,227 | PPP1R14A      | -0.736468249 |
| 8,228 | DATF1         | -0.736396153 |
| 8,229 | DUSP21        | -0.736381889 |
| 8,230 | ELA1          | -0.736304142 |
| 8,231 | MGC26988      | -0.736079512 |
| 8,232 | HNRPR         | -0.735949047 |
| 8,233 | MBD4          | -0.735936879 |
| 8,234 | C20ORF112     | -0.735739761 |
| 8,235 | STMN2         | -0.735669781 |
| 8,236 | LOC339344     | -0.735551569 |
| 8,237 | FAP           | -0.735398894 |
| 8,238 | COL6A2        | -0.735320242 |
| 8,239 | ACO1          | -0.735193834 |
| 8,240 | MAGEC2        | -0.734878243 |
| 8,241 | FLJ46675      | -0.73436135  |
| 8,242 | OR52A1        | -0.734273491 |
| 8,243 | GTF2E2        | -0.734271939 |
| 8,244 | NTRK3         | -0.734249863 |
| 8,245 | CLCA4         | -0.734165334 |
| 8,246 | EN1           | -0.734049593 |
| 8,247 | GPR161        | -0.734027489 |
| 8,248 | LARP          | -0.733885642 |
| 8,249 | EAF1          | -0.733680001 |
| 8,250 | KCNMB1        | -0.73367376  |
| 8,251 | MGC11257      | -0.733667495 |
| 8,252 | LOC90379      | -0.733542692 |
| 8,253 | MGC15875      | -0.733473724 |
| 8,254 | ZNF322A       | -0.733190926 |
| 8,255 | CDON          | -0.73316702  |
| 8,256 | GPT2          | -0.733130951 |
| 8,257 | ZFP36         | -0.733026526 |
| 8,258 | RAP1GA1       | -0.732960329 |
| 8,259 | LOC400746     | -0.73293124  |
| 8,260 | LOH12CR1      | -0.732894958 |
| 8,261 | ODZ2          | -0.732651575 |
| 8,262 | C10ORF88      | -0.732630964 |
| 8,263 | ATP6V1G3      | -0.732191844 |



|       |           |              |
|-------|-----------|--------------|
| 8,264 | SPAG7     | -0.731863537 |
| 8,265 | IGFL4     | -0.73164183  |
| 8,266 | C2ORF29   | -0.731446502 |
| 8,267 | PCP4      | -0.731446049 |
| 8,268 | PNRC2     | -0.731417441 |
| 8,269 | LOC283152 | -0.731392134 |
| 8,270 | LTB       | -0.731332992 |
| 8,271 | NRN1      | -0.730966602 |
| 8,272 | FLJ32965  | -0.730654588 |
| 8,273 | SGCA      | -0.730365498 |
| 8,274 | RWDD1     | -0.73023313  |
| 8,275 | SLC25A35  | -0.730039999 |
| 8,276 | LOC151963 | -0.729975454 |
| 8,277 | GAS6      | -0.729939668 |
| 8,278 | TRIM37    | -0.729886495 |
| 8,279 | OR2AE1    | -0.729798353 |
| 8,280 | OR6C6     | -0.729783536 |
| 8,281 | F25965    | -0.729770381 |
| 8,282 | LOC375133 | -0.729680103 |
| 8,283 | ARHGAP1   | -0.729379913 |
| 8,284 | NOXO1     | -0.729367638 |
| 8,285 | ELTD1     | -0.729307243 |
| 8,286 | PDLIM1    | -0.729160079 |
| 8,287 | UQCR      | -0.72912959  |
| 8,288 | C6ORF97   | -0.72907813  |
| 8,289 | FLJ13909  | -0.72903436  |
| 8,290 | ZC3HDC8   | -0.728994553 |
| 8,291 | LOC345222 | -0.728992113 |
| 8,292 | JMJD1A    | -0.728712653 |
| 8,293 | C6ORF75   | -0.72870015  |
| 8,294 | CA8       | -0.728636803 |
| 8,295 | HPCL2     | -0.728589275 |
| 8,296 | ZNF214    | -0.728339063 |
| 8,297 | OCA2      | -0.72831947  |
| 8,298 | KIAA1751  | -0.728033738 |
| 8,299 | CST4      | -0.72802085  |
| 8,300 | FLJ40235  | -0.727901661 |
| 8,301 | FAM9C     | -0.72771594  |
| 8,302 | GABRA5    | -0.727655659 |
| 8,303 | SLC6A6    | -0.727353511 |
| 8,304 | PNMT      | -0.727338063 |
| 8,305 | AKAP6     | -0.727055517 |
| 8,306 | HSA275986 | -0.726938608 |
| 8,307 | STK38     | -0.726876569 |
| 8,308 | OAS2      | -0.726863704 |
| 8,309 | THNSL1    | -0.72682053  |
| 8,310 | FLJ20249  | -0.726676259 |

|       |                  |              |
|-------|------------------|--------------|
| 8,311 | <i>FLJ14981</i>  | -0.726573128 |
| 8,312 | <i>FAM38B</i>    | -0.726381397 |
| 8,313 | <i>KIAA1853</i>  | -0.726373438 |
| 8,314 | <i>CRYGN</i>     | -0.726322677 |
| 8,315 | <i>VPS54</i>     | -0.726073687 |
| 8,316 | <i>CHODL</i>     | -0.72578908  |
| 8,317 | <i>COP</i>       | -0.725773719 |
| 8,318 | <i>SBK1</i>      | -0.725703801 |
| 8,319 | <i>LOC128153</i> | -0.725698903 |
| 8,320 | <i>USP19</i>     | -0.725477464 |
| 8,321 | <i>PP784</i>     | -0.725387376 |
| 8,322 | <i>TRAF2</i>     | -0.725325091 |
| 8,323 | <i>C8orf22</i>   | -0.724916596 |
| 8,324 | <i>ARID3B</i>    | -0.724723655 |
| 8,325 | <i>HKE2</i>      | -0.724701679 |
| 8,326 | <i>ADSS</i>      | -0.724407982 |
| 8,327 | <i>MRTF-B</i>    | -0.724270045 |
| 8,328 | <i>PAPPA2</i>    | -0.724094891 |
| 8,329 | <i>MRPS18A</i>   | -0.724060641 |
| 8,330 | <i>WASF1</i>     | -0.724040535 |
| 8,331 | <i>FATE1</i>     | -0.723825496 |
| 8,332 | <i>FATE1</i>     | -0.723825496 |
| 8,333 | <i>GRM5</i>      | -0.723774742 |
| 8,334 | <i>LOC90333</i>  | -0.723756413 |
| 8,335 | <i>MGC70924</i>  | -0.723653265 |
| 8,336 | <i>PIWIL1</i>    | -0.72345365  |
| 8,337 | <i>FLJ14451</i>  | -0.723424225 |
| 8,338 | <i>EEF1A2</i>    | -0.723280816 |
| 8,339 | <i>KIAA1579</i>  | -0.723177904 |
| 8,340 | <i>CD22</i>      | -0.722750389 |
| 8,341 | <i>UBE2B</i>     | -0.722472078 |
| 8,342 | <i>FKBP9</i>     | -0.722197509 |
| 8,343 | <i>GOR</i>       | -0.721997895 |
| 8,344 | <i>SGCD</i>      | -0.721921214 |
| 8,345 | <i>LOC653499</i> | -0.721828035 |
| 8,346 | <i>FLJ16353</i>  | -0.721793356 |
| 8,347 | <i>LOC139425</i> | -0.721704067 |
| 8,348 | <i>GLRA2</i>     | -0.721472712 |
| 8,349 | <i>TMEM41B</i>   | -0.721315519 |
| 8,350 | <i>DYX1C1</i>    | -0.721307198 |
| 8,351 | <i>TCF8</i>      | -0.720874158 |
| 8,352 | <i>DNM1L</i>     | -0.720751164 |
| 8,353 | <i>FLJ23554</i>  | -0.720744172 |
| 8,354 | <i>EVI2B</i>     | -0.720708379 |
| 8,355 | <i>OMA1</i>      | -0.720435214 |
| 8,356 | <i>OR2C1</i>     | -0.720346798 |
| 8,357 | <i>RNF135</i>    | -0.720199532 |

|       |                 |              |
|-------|-----------------|--------------|
| 8,358 | <i>SIPA1L1</i>  | -0.720197763 |
| 8,359 | <i>LPXN</i>     | -0.720047387 |
| 8,360 | <i>EPS8L2</i>   | -0.719932925 |
| 8,361 | <i>FALZ</i>     | -0.719845506 |
| 8,362 | <i>MGC10485</i> | -0.719685791 |
| 8,363 | <i>WBSCR20B</i> | -0.71962408  |
| 8,364 | <i>POLA</i>     | -0.719477986 |
| 8,365 | <i>NID67</i>    | -0.719418122 |
| 8,366 | <i>ITGBL1</i>   | -0.719380558 |
| 8,367 | <i>TTYH1</i>    | -0.719256108 |
| 8,368 | <i>SLC24A3</i>  | -0.719214106 |
| 8,369 | <i>THAP7</i>    | -0.71886704  |
| 8,370 | <i>ZMYND15</i>  | -0.718809732 |
| 8,371 | <i>AGXT2L1</i>  | -0.718538519 |
| 8,372 | <i>DDX6</i>     | -0.718529904 |
| 8,373 | <i>BRDG1</i>    | -0.718372084 |
| 8,374 | <i>PSME3</i>    | -0.718135919 |
| 8,375 | <i>SLC7A11</i>  | -0.718073622 |
| 8,376 | <i>ACTR10</i>   | -0.718069838 |
| 8,377 | <i>MPRG</i>     | -0.718051932 |
| 8,378 | <i>C5ORF5</i>   | -0.717990514 |
| 8,379 | <i>AKAP8</i>    | -0.717986159 |
| 8,380 | <i>FLJ33810</i> | -0.717287677 |
| 8,381 | <i>MYOM1</i>    | -0.717268418 |
| 8,382 | <i>GNB5</i>     | -0.717152606 |
| 8,383 | <i>RPAP1</i>    | -0.71689069  |
| 8,384 | <i>ABCA8</i>    | -0.716829313 |
| 8,385 | <i>TSNAXIP1</i> | -0.716501918 |
| 8,386 | <i>CSNK1A1L</i> | -0.716062091 |
| 8,387 | <i>RASL11B</i>  | -0.715995778 |
| 8,388 | <i>TSPYL5</i>   | -0.715963083 |
| 8,389 | <i>CTTNBP2</i>  | -0.715933189 |
| 8,390 | <i>DEFB137</i>  | -0.715872473 |
| 8,391 | <i>FCGR2C</i>   | -0.715843718 |
| 8,392 | <i>MGC20481</i> | -0.715745442 |
| 8,393 | <i>FLJ20619</i> | -0.715714935 |
| 8,394 | <i>C19ORF28</i> | -0.715606536 |
| 8,395 | <i>EDG1</i>     | -0.715604465 |
| 8,396 | <i>THRAP4</i>   | -0.715326983 |
| 8,397 | <i>MGC22960</i> | -0.715204016 |
| 8,398 | <i>FLJ35976</i> | -0.715167602 |
| 8,399 | <i>JMJD7</i>    | -0.714805849 |
| 8,400 | <i>PKD1L3</i>   | -0.714748172 |
| 8,401 | <i>OR2M2</i>    | -0.714549961 |
| 8,402 | <i>CHS1</i>     | -0.714543499 |
| 8,403 | <i>TCFL1</i>    | -0.714411883 |
| 8,404 | <i>MGC10744</i> | -0.714364718 |

|       |                  |              |
|-------|------------------|--------------|
| 8,405 | <i>LOC402055</i> | -0.714349173 |
| 8,406 | <i>ITGB1BP3</i>  | -0.714128025 |
| 8,407 | <i>MKRN3</i>     | -0.714094682 |
| 8,408 | <i>PROS1</i>     | -0.7138282   |
| 8,409 | <i>ARH</i>       | -0.713781203 |
| 8,410 | <i>KIR3DL2</i>   | -0.71369772  |
| 8,411 | <i>CFDP1</i>     | -0.713675913 |
| 8,412 | <i>CFDP1</i>     | -0.713675913 |
| 8,413 | <i>ALS2</i>      | -0.713427996 |
| 8,414 | <i>FLJ21308</i>  | -0.713387273 |
| 8,415 | <i>CFHL2</i>     | -0.713107469 |
| 8,416 | <i>TRIAD3</i>    | -0.713107171 |
| 8,417 | <i>RNASE9</i>    | -0.713104654 |
| 8,418 | <i>LPHN3</i>     | -0.713035752 |
| 8,419 | <i>MGC47869</i>  | -0.71283322  |
| 8,420 | <i>HLCS</i>      | -0.712682053 |
| 8,421 | <i>RNF185</i>    | -0.712549703 |
| 8,422 | <i>CR2</i>       | -0.712404892 |
| 8,423 | <i>ELMO2</i>     | -0.712290264 |
| 8,424 | <i>UCN</i>       | -0.712247793 |
| 8,425 | <i>PNPLA1</i>    | -0.712152573 |
| 8,426 | <i>GLA</i>       | -0.71176989  |
| 8,427 | <i>AQP11</i>     | -0.71165214  |
| 8,428 | <i>FZD7</i>      | -0.711617395 |
| 8,429 | <i>CX62</i>      | -0.711592243 |
| 8,430 | <i>ZNF91</i>     | -0.711387585 |
| 8,431 | <i>ALLC</i>      | -0.711123169 |
| 8,432 | <i>EFHD1</i>     | -0.711044228 |
| 8,433 | <i>TAS2R5</i>    | -0.710946552 |
| 8,434 | <i>PTPRG</i>     | -0.710828911 |
| 8,435 | <i>MMRN2</i>     | -0.710689836 |
| 8,436 | <i>KIAA0195</i>  | -0.710592272 |
| 8,437 | <i>DCUN1D1</i>   | -0.710507436 |
| 8,438 | <i>PDLIM2</i>    | -0.710464361 |
| 8,439 | <i>SLC38A3</i>   | -0.710264578 |
| 8,440 | <i>LOC54499</i>  | -0.710253993 |
| 8,441 | <i>CYORF15B</i>  | -0.710106075 |
| 8,442 | <i>UBE2D3</i>    | -0.710080127 |
| 8,443 | <i>TXN</i>       | -0.710071609 |
| 8,444 | <i>CDH26</i>     | -0.709989459 |
| 8,445 | <i>SUMO2</i>     | -0.709666861 |
| 8,446 | <i>PPP2R1A</i>   | -0.709643261 |
| 8,447 | <i>MKNK1</i>     | -0.709582475 |
| 8,448 | <i>SAMD4</i>     | -0.709511534 |
| 8,449 | <i>EXTL2</i>     | -0.709435828 |
| 8,450 | <i>PCDHB2</i>    | -0.709387094 |
| 8,451 | <i>OLFM1</i>     | -0.709351151 |

|       |                  |              |
|-------|------------------|--------------|
| 8,452 | <i>OPN1MW</i>    | -0.70934949  |
| 8,453 | <i>DFNB31</i>    | -0.709332137 |
| 8,454 | <i>MGC24132</i>  | -0.70921005  |
| 8,455 | <i>TJP4</i>      | -0.709103173 |
| 8,456 | <i>LILRB1</i>    | -0.709042403 |
| 8,457 | <i>TAT</i>       | -0.709008251 |
| 8,458 | <i>LOC283232</i> | -0.708978848 |
| 8,459 | <i>CDH23</i>     | -0.708795873 |
| 8,460 | <i>YWHAZ</i>     | -0.708732452 |
| 8,461 | <i>LOC284207</i> | -0.708438569 |
| 8,462 | <i>FLJ32421</i>  | -0.708405258 |
| 8,463 | <i>CLDN19</i>    | -0.708292337 |
| 8,464 | <i>PES1</i>      | -0.708228754 |
| 8,465 | <i>TAS2R60</i>   | -0.708104562 |
| 8,466 | <i>ZNF31</i>     | -0.708098953 |
| 8,467 | <i>TUBA1</i>     | -0.7080955   |
| 8,468 | <i>PRKCSH</i>    | -0.708043002 |
| 8,469 | <i>STXBP4</i>    | -0.707960993 |
| 8,470 | <i>LOC146822</i> | -0.707946833 |
| 8,471 | <i>TFF2</i>      | -0.707773362 |
| 8,472 | <i>PCK1</i>      | -0.707646506 |
| 8,473 | <i>HDC</i>       | -0.707646367 |
| 8,474 | <i>IMP-1</i>     | -0.707277824 |
| 8,475 | <i>ZNF708</i>    | -0.707237757 |
| 8,476 | <i>SLC25A24</i>  | -0.707167255 |
| 8,477 | <i>LOC65122</i>  | -0.707091243 |
| 8,478 | <i>NAB1</i>      | -0.707014237 |
| 8,479 | <i>GNL1</i>      | -0.7069409   |
| 8,480 | <i>F13B</i>      | -0.706346284 |
| 8,481 | <i>FLJ35880</i>  | -0.70620336  |
| 8,482 | <i>OR51E2</i>    | -0.706148473 |
| 8,483 | <i>ERN2</i>      | -0.705982121 |
| 8,484 | <i>SH3BGR</i>    | -0.705973834 |
| 8,485 | <i>LOC150763</i> | -0.70580507  |
| 8,486 | <i>CHD7</i>      | -0.705767593 |
| 8,487 | <i>SCAMP4</i>    | -0.705723772 |
| 8,488 | <i>C21ORF55</i>  | -0.705262349 |
| 8,489 | <i>KCNAB1</i>    | -0.705162485 |
| 8,490 | <i>TRPC4AP</i>   | -0.705076463 |
| 8,491 | <i>LOC144363</i> | -0.704959749 |
| 8,492 | <i>MGC3329</i>   | -0.704900136 |
| 8,493 | <i>ABCC5</i>     | -0.70461279  |
| 8,494 | <i>OMP</i>       | -0.704598233 |
| 8,495 | <i>TOP3B</i>     | -0.704573876 |
| 8,496 | <i>SCOTIN</i>    | -0.704462564 |
| 8,497 | <i>C8ORFK23</i>  | -0.704446773 |
| 8,498 | <i>C10ORF117</i> | -0.704223099 |

|       |                  |              |
|-------|------------------|--------------|
| 8,499 | <i>FLJ11342</i>  | -0.704130963 |
| 8,500 | <i>STOML2</i>    | -0.704048145 |
| 8,501 | <i>SN</i>        | -0.703992826 |
| 8,502 | <i>PRKD2</i>     | -0.703879793 |
| 8,503 | <i>KCNQ2</i>     | -0.703803951 |
| 8,504 | <i>MUF1</i>      | -0.703328082 |
| 8,505 | <i>EFNB2</i>     | -0.703237954 |
| 8,506 | <i>EIF2B1</i>    | -0.703094363 |
| 8,507 | <i>PLAU</i>      | -0.703036183 |
| 8,508 | <i>ZNF6</i>      | -0.702886403 |
| 8,509 | <i>PP591</i>     | -0.702789431 |
| 8,510 | <i>ATP5I</i>     | -0.702757222 |
| 8,511 | <i>CLU</i>       | -0.702720452 |
| 8,512 | <i>SCN1A</i>     | -0.70263211  |
| 8,513 | <i>LOC338773</i> | -0.70248639  |
| 8,514 | <i>KIAA1160</i>  | -0.702415998 |
| 8,515 | <i>DEGS2</i>     | -0.702261141 |
| 8,516 | <i>FLJ12584</i>  | -0.702212253 |
| 8,517 | <i>SFRS8</i>     | -0.701941811 |
| 8,518 | <i>KIAA1468</i>  | -0.701941811 |
| 8,519 | <i>DEFA5</i>     | -0.701374298 |
| 8,520 | <i>HSA277841</i> | -0.701326636 |
| 8,521 | <i>LOC653566</i> | -0.701306699 |
| 8,522 | <i>SYT15</i>     | -0.70117904  |
| 8,523 | <i>THEM2</i>     | -0.701155677 |
| 8,524 | <i>MFAP3</i>     | -0.701094914 |
| 8,525 | <i>MGC2655</i>   | -0.701014135 |
| 8,526 | <i>CLEC1</i>     | -0.700875184 |
| 8,527 | <i>WBSCR16</i>   | -0.700809288 |
| 8,528 | <i>WSB1</i>      | -0.70066036  |
| 8,529 | <i>SCFD2</i>     | -0.700450976 |
| 8,530 | <i>MTHFD1</i>    | -0.700403518 |
| 8,531 | <i>TAAR6</i>     | -0.700270537 |
| 8,532 | <i>SLC4A8</i>    | -0.700058988 |
| 8,533 | <i>LCMT2</i>     | -0.70001595  |
| 8,534 | <i>OR2T4</i>     | -0.699697541 |
| 8,535 | <i>ATP11C</i>    | -0.6996717   |
| 8,536 | <i>PI4K2B</i>    | -0.69957523  |
| 8,537 | <i>GPR24</i>     | -0.699441386 |
| 8,538 | <i>TOX</i>       | -0.698985728 |
| 8,539 | <i>PCDHB6</i>    | -0.698787775 |
| 8,540 | <i>FLI33215</i>  | -0.698703064 |
| 8,541 | <i>PWP1</i>      | -0.698678479 |
| 8,542 | <i>PTCRA</i>     | -0.698490396 |
| 8,543 | <i>CCNL1</i>     | -0.698244581 |
| 8,544 | <i>KIAA1984</i>  | -0.697675959 |
| 8,545 | <i>RARRES2</i>   | -0.697531456 |

|       |                 |              |
|-------|-----------------|--------------|
| 8,546 | <i>OR8K3</i>    | -0.697435993 |
| 8,547 | <i>OR1A1</i>    | -0.697318221 |
| 8,548 | <i>C6ORF85</i>  | -0.697128718 |
| 8,549 | <i>VIT</i>      | -0.697070174 |
| 8,550 | <i>SAC</i>      | -0.697013446 |
| 8,551 | <i>SLC11A1</i>  | -0.696908547 |
| 8,552 | <i>DPH2L1</i>   | -0.696705735 |
| 8,553 | <i>DNAJA4</i>   | -0.696484029 |
| 8,554 | <i>ETS2</i>     | -0.69645592  |
| 8,555 | <i>ITLN1</i>    | -0.696452003 |
| 8,556 | <i>MGC16186</i> | -0.696234477 |
| 8,557 | <i>APOBEC3G</i> | -0.695908201 |
| 8,558 | <i>ZNF83</i>    | -0.695610669 |
| 8,559 | <i>AASS</i>     | -0.695586996 |
| 8,560 | <i>ZNF291</i>   | -0.695579601 |
| 8,561 | <i>KIAA1272</i> | -0.69475508  |
| 8,562 | <i>BMP1</i>     | -0.694615224 |
| 8,563 | <i>OR13A1</i>   | -0.694330911 |
| 8,564 | <i>CRABP1</i>   | -0.694263419 |
| 8,565 | <i>C1QTNF6</i>  | -0.693951297 |
| 8,566 | <i>PGLS</i>     | -0.693843106 |
| 8,567 | <i>RPS6KB2</i>  | -0.69371089  |
| 8,568 | <i>FLJ11336</i> | -0.693504121 |
| 8,569 | <i>C6ORF125</i> | -0.693473574 |
| 8,570 | <i>PMF1</i>     | -0.693449932 |
| 8,571 | <i>RBBP4</i>    | -0.693335965 |
| 8,572 | <i>CLEC5A</i>   | -0.693252208 |
| 8,573 | <i>RAI1</i>     | -0.693245194 |
| 8,574 | <i>MGC8407</i>  | -0.692973149 |
| 8,575 | <i>CD1C</i>     | -0.692956918 |
| 8,576 | <i>STARS</i>    | -0.692879899 |
| 8,577 | <i>CEBPB</i>    | -0.692679795 |
| 8,578 | <i>NFATC4</i>   | -0.692643963 |
| 8,579 | <i>ENPEP</i>    | -0.692414244 |
| 8,580 | <i>NYD-SP21</i> | -0.692226606 |
| 8,581 | <i>RTP1</i>     | -0.692210653 |
| 8,582 | <i>ATG9A</i>    | -0.692168716 |
| 8,583 | <i>TFEC</i>     | -0.691788717 |
| 8,584 | <i>DHTKD1</i>   | -0.691432794 |
| 8,585 | <i>SIPA1</i>    | -0.691358394 |
| 8,586 | <i>HTR1B</i>    | -0.691238388 |
| 8,587 | <i>PAQR7</i>    | -0.690986119 |
| 8,588 | <i>CDH8</i>     | -0.690788472 |
| 8,589 | <i>MGC8974</i>  | -0.690680763 |
| 8,590 | <i>WNT5A</i>    | -0.690381117 |
| 8,591 | <i>PDHX</i>     | -0.690259936 |
| 8,592 | <i>OR52D1</i>   | -0.690177633 |

|       |                      |              |
|-------|----------------------|--------------|
| 8,593 | <i>PRDM8</i>         | -0.690065834 |
| 8,594 | <i>GBP4</i>          | -0.690055149 |
| 8,595 | <i>SH3YL1</i>        | -0.689866168 |
| 8,596 | <i>VPRBP</i>         | -0.689866045 |
| 8,597 | <i>RAP1B</i>         | -0.689830333 |
| 8,598 | <i>KIAA1191</i>      | -0.689776707 |
| 8,599 | <i>PNMA3</i>         | -0.689756705 |
| 8,600 | <i>DNAJB6</i>        | -0.689564712 |
| 8,601 | <i>BACE1</i>         | -0.689548598 |
| 8,602 | <i>LOC51255</i>      | -0.689419547 |
| 8,603 | <i>ITGB8</i>         | -0.689335873 |
| 8,604 | <i>KPNA4</i>         | -0.689223826 |
| 8,605 | <i>SEPP1</i>         | -0.689199153 |
| 8,606 | <i>LOC90410</i>      | -0.688798416 |
| 8,607 | <i>ZNF595</i>        | -0.688747531 |
| 8,608 | <i>LOC790955</i>     | -0.688700665 |
| 8,609 | <i>TCERG1L</i>       | -0.688617202 |
| 8,610 | <i>APBA3</i>         | -0.68819286  |
| 8,611 | <i>ADD1</i>          | -0.688095305 |
| 8,612 | <i>HCRTR2</i>        | -0.68802683  |
| 8,613 | <i>KIAA1804</i>      | -0.687988539 |
| 8,614 | <i>FLJ45744</i>      | -0.687876128 |
| 8,615 | <i>CYP4B1</i>        | -0.687247181 |
| 8,616 | <i>SEZ6L</i>         | -0.687108784 |
| 8,617 | <i>TCF21</i>         | -0.68703745  |
| 8,618 | <i>C19ORF4</i>       | -0.686941949 |
| 8,619 | <i>LOC405753</i>     | -0.686881707 |
| 8,620 | <i>TAF3</i>          | -0.686832928 |
| 8,621 | <i>B1</i>            | -0.686760655 |
| 8,622 | <i>XRN2</i>          | -0.686551661 |
| 8,623 | <i>FKSG44</i>        | -0.686489002 |
| 8,624 | <i>SFRP1</i>         | -0.686364412 |
| 8,625 | <i>OR51G2</i>        | -0.68632297  |
| 8,626 | <i>DKFZP313G1735</i> | -0.686320004 |
| 8,627 | <i>VBP1</i>          | -0.686086586 |
| 8,628 | <i>ODC-P</i>         | -0.686080134 |
| 8,629 | <i>IL31</i>          | -0.685968172 |
| 8,630 | <i>CNGB3</i>         | -0.685956007 |
| 8,631 | <i>LOC150368</i>     | -0.685764752 |
| 8,632 | <i>LRIG1</i>         | -0.6854929   |
| 8,633 | <i>MYOD1</i>         | -0.684810298 |
| 8,634 | <i>FLJ22662</i>      | -0.684789434 |
| 8,635 | <i>SERPINA12</i>     | -0.684679945 |
| 8,636 | <i>C20ORF12</i>      | -0.68461665  |
| 8,637 | <i>WNT3A</i>         | -0.68458268  |
| 8,638 | <i>SELO</i>          | -0.684493829 |
| 8,639 | <i>DNB5</i>          | -0.684373097 |



|       |           |              |
|-------|-----------|--------------|
| 8,640 | PANK3     | -0.684288272 |
| 8,641 | LOC389834 | -0.684211025 |
| 8,642 | C20ORF22  | -0.68391345  |
| 8,643 | C6ORF82   | -0.683410892 |
| 8,644 | SPSB4     | -0.683282058 |
| 8,645 | RBBP7     | -0.683137531 |
| 8,646 | FLJ42177  | -0.683114233 |
| 8,647 | C2ORF23   | -0.682979054 |
| 8,648 | FLJ38736  | -0.682877399 |
| 8,649 | KIAA0648  | -0.682850697 |
| 8,650 | AARSL     | -0.682847457 |
| 8,651 | MRPL3     | -0.682732771 |
| 8,652 | FLJ10637  | -0.682367361 |
| 8,653 | RASGEF1C  | -0.682203542 |
| 8,654 | CDC42BPA  | -0.682006508 |
| 8,655 | GSDMDC1   | -0.681852732 |
| 8,656 | LOC220869 | -0.681594033 |
| 8,657 | KIAA0669  | -0.681594033 |
| 8,658 | EBF2      | -0.681392579 |
| 8,659 | MCM6      | -0.681265618 |
| 8,660 | ZNF222    | -0.681250122 |
| 8,661 | TA-PP2C   | -0.681190012 |
| 8,662 | NCKAP1    | -0.681180413 |
| 8,663 | EXOSC10   | -0.681059814 |
| 8,664 | SNX2      | -0.681007112 |
| 8,665 | MGAT3     | -0.680772851 |
| 8,666 | FLJ12606  | -0.680597142 |
| 8,667 | LOC401152 | -0.6805958   |
| 8,668 | PIGN      | -0.680549433 |
| 8,669 | C20orf118 | -0.680505223 |
| 8,670 | KPNB3     | -0.68047752  |
| 8,671 | LOC340554 | -0.680331554 |
| 8,672 | CHIT1     | -0.680293415 |
| 8,673 | LASS3     | -0.680286751 |
| 8,674 | HSPB2     | -0.679454849 |
| 8,675 | CST1      | -0.679389065 |
| 8,676 | PYGO1     | -0.67926668  |
| 8,677 | C20ORF10  | -0.679264319 |
| 8,678 | UQCRC1    | -0.679100414 |
| 8,679 | IDS       | -0.678871396 |
| 8,680 | ITIH2     | -0.678845018 |
| 8,681 | PACS1     | -0.678686192 |
| 8,682 | LOC645922 | -0.6783406   |
| 8,683 | CENTA1    | -0.678339617 |
| 8,684 | PDZRN4    | -0.678299877 |
| 8,685 | ESX1L     | -0.678240476 |
| 8,686 | GPR142    | -0.67806819  |

|       |           |              |
|-------|-----------|--------------|
| 8,687 | TACC1     | -0.678041337 |
| 8,688 | P4HB      | -0.67798225  |
| 8,689 | C14ORF153 | -0.677869898 |
| 8,690 | PYCR2     | -0.677858443 |
| 8,691 | IFNA7     | -0.677594228 |
| 8,692 | KIAA1055  | -0.677528512 |
| 8,693 | NEIL3     | -0.677522356 |
| 8,694 | FLJ25339  | -0.677446518 |
| 8,695 | KRTHA7    | -0.677442982 |
| 8,696 | FLJ25439  | -0.677295512 |
| 8,697 | FUT10     | -0.677222463 |
| 8,698 | TUBB      | -0.677037871 |
| 8,699 | HLA-DOA   | -0.676970963 |
| 8,700 | CA2       | -0.676814904 |
| 8,701 | MGC4171   | -0.676423713 |
| 8,702 | PTGER4    | -0.676361087 |
| 8,703 | CUTC      | -0.676140281 |
| 8,704 | ZNF576    | -0.676068983 |
| 8,705 | CHST12    | -0.675919203 |
| 8,706 | SND1      | -0.675886567 |
| 8,707 | RP4-622L5 | -0.675726851 |
| 8,708 | C6        | -0.675614559 |
| 8,709 | CACNG5    | -0.675488283 |
| 8,710 | RGS9      | -0.675291472 |
| 8,711 | C10ORF45  | -0.675281561 |
| 8,712 | ZNF626    | -0.675224966 |
| 8,713 | LOC342132 | -0.675158687 |
| 8,714 | PAMCI     | -0.674797419 |
| 8,715 | CTCF      | -0.674773898 |
| 8,716 | BLZF1     | -0.674674016 |
| 8,717 | MGC10871  | -0.674663431 |
| 8,718 | GPR158    | -0.674640395 |
| 8,719 | GOLGA4    | -0.674441276 |
| 8,720 | RBM22     | -0.674342244 |
| 8,721 | UBE4B     | -0.674199577 |
| 8,722 | SERPINB11 | -0.674088653 |
| 8,723 | ZNF10     | -0.673863282 |
| 8,724 | FBXL6     | -0.673849173 |
| 8,725 | CNTN1     | -0.673823083 |
| 8,726 | A2BP1     | -0.673810723 |
| 8,727 | ATF2      | -0.673208138 |
| 8,728 | RBPM2     | -0.673179271 |
| 8,729 | IMMT      | -0.673153041 |
| 8,730 | FZR1      | -0.673124942 |
| 8,731 | OR2J3     | -0.672973194 |
| 8,732 | KIAA0789  | -0.672908924 |
| 8,733 | TLK2      | -0.672893523 |

|       |                 |              |
|-------|-----------------|--------------|
| 8,734 | HIC2            | -0.67254748  |
| 8,735 | ENO1            | -0.672498723 |
| 8,736 | ZNF429          | -0.672046792 |
| 8,737 | MLLT2           | -0.672040086 |
| 8,738 | LOC389293       | -0.671877866 |
| 8,739 | PBP             | -0.671493908 |
| 8,740 | FGF5            | -0.67144412  |
| 8,741 | PAK6            | -0.671244453 |
| 8,742 | LOC339896       | -0.671221145 |
| 8,743 | CCDC6           | -0.671182283 |
| 8,744 | FLJ11000        | -0.671111783 |
| 8,745 | RBBP5           | -0.671001556 |
| 8,746 | FSD1L           | -0.67059835  |
| 8,747 | LNPEP           | -0.670505768 |
| 8,748 | DHX30           | -0.670309953 |
| 8,749 | GALNT11         | -0.670240866 |
| 8,750 | TNFSF12-TNFSF13 | -0.67023626  |
| 8,751 | TNKS2           | -0.670190399 |
| 8,752 | BOMB            | -0.670105451 |
| 8,753 | PPARD           | -0.67007139  |
| 8,754 | RAB9A           | -0.669631362 |
| 8,755 | TIAM2           | -0.669268756 |
| 8,756 | IL10RB          | -0.669232739 |
| 8,757 | C10ORF4         | -0.669067102 |
| 8,758 | DDX17           | -0.668972917 |
| 8,759 | AEBP1           | -0.668449351 |
| 8,760 | CCNB3           | -0.668282674 |
| 8,761 | EIF4G2          | -0.668123176 |
| 8,762 | FLJ33718        | -0.66801304  |
| 8,763 | LSM10           | -0.667923066 |
| 8,764 | FPGS            | -0.667855683 |
| 8,765 | TMCC3           | -0.667483763 |
| 8,766 | PS1D            | -0.667477253 |
| 8,767 | PABPC1          | -0.66742542  |
| 8,768 | UROD            | -0.667277328 |
| 8,769 | HBS1L           | -0.667232081 |
| 8,770 | PDE9A           | -0.667231233 |
| 8,771 | WDR59           | -0.666927487 |
| 8,772 | AVPR1B          | -0.666837831 |
| 8,773 | ABCG2           | -0.666786784 |
| 8,774 | TRIM67          | -0.666650729 |
| 8,775 | MGC16385        | -0.666325776 |
| 8,776 | ADAM11          | -0.666085702 |
| 8,777 | RAPGEF3         | -0.665907601 |
| 8,778 | MGC2744         | -0.665668812 |
| 8,779 | FLJ40873        | -0.665606795 |
| 8,780 | LRFN5           | -0.665521755 |

|       |                      |              |
|-------|----------------------|--------------|
| 8,781 | <i>SASH1</i>         | -0.665463881 |
| 8,782 | <i>C8A</i>           | -0.665430699 |
| 8,783 | <i>TH</i>            | -0.665392949 |
| 8,784 | <i>BNIP1L</i>        | -0.665197219 |
| 8,785 | <i>ACADSB</i>        | -0.665092781 |
| 8,786 | <i>BTBD14B</i>       | -0.664876375 |
| 8,787 | <i>UBE2G2</i>        | -0.664785412 |
| 8,788 | <i>ARPP-19</i>       | -0.664781534 |
| 8,789 | <i>SESTD1</i>        | -0.664592645 |
| 8,790 | <i>DGKH</i>          | -0.664428425 |
| 8,791 | <i>MGC3794</i>       | -0.664337142 |
| 8,792 | <i>SLC17A1</i>       | -0.664251741 |
| 8,793 | <i>KIAA1524</i>      | -0.664241864 |
| 8,794 | <i>KIAA0073</i>      | -0.664145456 |
| 8,795 | <i>UNQ2541</i>       | -0.663944479 |
| 8,796 | <i>OR10A6</i>        | -0.663380116 |
| 8,797 | <i>RPGRIP1</i>       | -0.663286742 |
| 8,798 | <i>SEC61A2</i>       | -0.663010411 |
| 8,799 | <i>GPD2</i>          | -0.66293782  |
| 8,800 | <i>SEMA6D</i>        | -0.662780814 |
| 8,801 | <i>PRPS1</i>         | -0.662630222 |
| 8,802 | <i>ELLS1</i>         | -0.662587245 |
| 8,803 | <i>IFNK</i>          | -0.662228854 |
| 8,804 | <i>CRB1</i>          | -0.662141178 |
| 8,805 | <i>INSR</i>          | -0.661625149 |
| 8,806 | <i>NOSTRIN</i>       | -0.661572931 |
| 8,807 | <i>PTPN11</i>        | -0.66153933  |
| 8,808 | <i>GPR73</i>         | -0.66149735  |
| 8,809 | <i>FLJ11259</i>      | -0.6613856   |
| 8,810 | <i>CDCA5</i>         | -0.660858826 |
| 8,811 | <i>IGSF9</i>         | -0.66085175  |
| 8,812 | <i>LOC388960</i>     | -0.660753273 |
| 8,813 | <i>ACOXL</i>         | -0.660725489 |
| 8,814 | <i>DKFZP761B0514</i> | -0.660705458 |
| 8,815 | <i>NME6</i>          | -0.6606958   |
| 8,816 | <i>BTG3</i>          | -0.660610992 |
| 8,817 | <i>UBE3A</i>         | -0.660085017 |
| 8,818 | <i>AVP</i>           | -0.660070806 |
| 8,819 | <i>P2RY10</i>        | -0.659550232 |
| 8,820 | <i>CX3CR1</i>        | -0.659549996 |
| 8,821 | <i>PTPLB</i>         | -0.659401325 |
| 8,822 | <i>LRRC15</i>        | -0.65932087  |
| 8,823 | <i>RERG</i>          | -0.659209912 |
| 8,824 | <i>ZHX1</i>          | -0.659066603 |
| 8,825 | <i>UBD</i>           | -0.658831236 |
| 8,826 | <i>KIAA1881</i>      | -0.658809527 |
| 8,827 | <i>RBBP7</i>         | -0.65880285  |

|       |                  |              |
|-------|------------------|--------------|
| 8,828 | <i>TGDS</i>      | -0.65873722  |
| 8,829 | <i>ING1</i>      | -0.658312526 |
| 8,830 | <i>MGC14289</i>  | -0.65817543  |
| 8,831 | <i>STK36</i>     | -0.657998457 |
| 8,832 | <i>PLAA</i>      | -0.657934375 |
| 8,833 | <i>C12ORF2</i>   | -0.65755666  |
| 8,834 | <i>TSC22D1</i>   | -0.657462842 |
| 8,835 | <i>UHRF1</i>     | -0.657404636 |
| 8,836 | <i>TCF19</i>     | -0.657391851 |
| 8,837 | <i>PCYT2</i>     | -0.65723697  |
| 8,838 | <i>WFS1</i>      | -0.657042401 |
| 8,839 | <i>CYP21A2</i>   | -0.65684445  |
| 8,840 | <i>ZNF38</i>     | -0.656664371 |
| 8,841 | <i>CRSP7</i>     | -0.656656476 |
| 8,842 | <i>DAP3</i>      | -0.656474238 |
| 8,843 | <i>KIAA1529</i>  | -0.656190544 |
| 8,844 | <i>HIST1H1C</i>  | -0.655845555 |
| 8,845 | <i>EDG7</i>      | -0.655562639 |
| 8,846 | <i>LOC390231</i> | -0.655555097 |
| 8,847 | <i>CGI-48</i>    | -0.655464478 |
| 8,848 | <i>SF3A2</i>     | -0.65543209  |
| 8,849 | <i>C9ORF58</i>   | -0.655431574 |
| 8,850 | <i>EGFL11</i>    | -0.655373623 |
| 8,851 | <i>SELB</i>      | -0.655328353 |
| 8,852 | <i>PAFAH1B1</i>  | -0.655176486 |
| 8,853 | <i>IFNA13</i>    | -0.655081611 |
| 8,854 | <i>OSBPL9</i>    | -0.654990588 |
| 8,855 | <i>BMP2K</i>     | -0.654838371 |
| 8,856 | <i>ALS2CR7</i>   | -0.654838371 |
| 8,857 | <i>ANKRD50</i>   | -0.654528442 |
| 8,858 | <i>HPR</i>       | -0.654400417 |
| 8,859 | <i>TGFBI</i>     | -0.654361649 |
| 8,860 | <i>P2RY2</i>     | -0.654195658 |
| 8,861 | <i>CD47</i>      | -0.65331853  |
| 8,862 | <i>CYR61</i>     | -0.653171603 |
| 8,863 | <i>KRT6B</i>     | -0.652887003 |
| 8,864 | <i>PSG4</i>      | -0.652571014 |
| 8,865 | <i>FEM1A</i>     | -0.652460602 |
| 8,866 | <i>GPR132</i>    | -0.652459899 |
| 8,867 | <i>SEC22L2</i>   | -0.652441645 |
| 8,868 | <i>FLJ22028</i>  | -0.652382574 |
| 8,869 | <i>C18ORF8</i>   | -0.652213165 |
| 8,870 | <i>IGSF8</i>     | -0.652190591 |
| 8,871 | <i>BCDO2</i>     | -0.651918475 |
| 8,872 | <i>PRKCM</i>     | -0.651912993 |
| 8,873 | <i>CGI-69</i>    | -0.651787122 |
| 8,874 | <i>MICA</i>      | -0.651508382 |

|       |                      |              |
|-------|----------------------|--------------|
| 8,875 | <i>ORC4L</i>         | -0.651335221 |
| 8,876 | <i>GEFT</i>          | -0.651188625 |
| 8,877 | <i>DTNB</i>          | -0.651073912 |
| 8,878 | <i>SPTBN4</i>        | -0.650838385 |
| 8,879 | <i>MORF4L1</i>       | -0.650755107 |
| 8,880 | <i>KCNN4</i>         | -0.650534701 |
| 8,881 | <i>SLC39A6</i>       | -0.650447489 |
| 8,882 | <i>E4F1</i>          | -0.65040057  |
| 8,883 | <i>CYP2F1</i>        | -0.650148261 |
| 8,884 | <i>HIVEP3</i>        | -0.650043229 |
| 8,885 | <i>MYBPC1</i>        | -0.649778743 |
| 8,886 | <i>KIAA1543</i>      | -0.649534988 |
| 8,887 | <i>C6ORF60</i>       | -0.649503023 |
| 8,888 | <i>KNDC1</i>         | -0.649468408 |
| 8,889 | <i>SHH</i>           | -0.649459588 |
| 8,890 | <i>FLJ21657</i>      | -0.649310927 |
| 8,891 | <i>MCART1</i>        | -0.64921751  |
| 8,892 | <i>C6ORF96</i>       | -0.649162458 |
| 8,893 | <i>DAG1</i>          | -0.648652732 |
| 8,894 | <i>AOAH</i>          | -0.648612476 |
| 8,895 | <i>TOM1</i>          | -0.64860267  |
| 8,896 | <i>CHD1L</i>         | -0.64852027  |
| 8,897 | <i>ARF3</i>          | -0.648473144 |
| 8,898 | <i>ARMCX3</i>        | -0.64846912  |
| 8,899 | <i>LSM3</i>          | -0.64841473  |
| 8,900 | <i>DDX3X</i>         | -0.648374425 |
| 8,901 | <i>ANKRD32</i>       | -0.648197047 |
| 8,902 | <i>TIAL1</i>         | -0.648127837 |
| 8,903 | <i>CLCNKB</i>        | -0.648063447 |
| 8,904 | <i>RHOQ</i>          | -0.647862216 |
| 8,905 | <i>CCNC</i>          | -0.647719405 |
| 8,906 | <i>ANKRD10</i>       | -0.647616092 |
| 8,907 | <i>MC1R</i>          | -0.64754024  |
| 8,908 | <i>ARK5</i>          | -0.647474468 |
| 8,909 | <i>TNFSF9</i>        | -0.647445039 |
| 8,910 | <i>NEUROD4</i>       | -0.647351464 |
| 8,911 | <i>WDR23</i>         | -0.647350722 |
| 8,912 | <i>FLJ10579</i>      | -0.647244524 |
| 8,913 | <i>CATSPER1</i>      | -0.646973557 |
| 8,914 | <i>KRT6IRS</i>       | -0.646628514 |
| 8,915 | <i>SCGB1A1</i>       | -0.646493827 |
| 8,916 | <i>ATP6V1B1</i>      | -0.646468971 |
| 8,917 | <i>TIE</i>           | -0.646373542 |
| 8,918 | <i>DKFZP586C1924</i> | -0.646335    |
| 8,919 | <i>MGC4562</i>       | -0.646085563 |
| 8,920 | <i>PRG4</i>          | -0.646065724 |
| 8,921 | <i>GRK1</i>          | -0.646054523 |

|       |                      |              |
|-------|----------------------|--------------|
| 8,922 | <i>CHTF18</i>        | -0.645972371 |
| 8,923 | <i>TMEM7</i>         | -0.645867137 |
| 8,924 | <i>CTPS</i>          | -0.645818919 |
| 8,925 | <i>POLG</i>          | -0.645689807 |
| 8,926 | <i>DPP6</i>          | -0.645539786 |
| 8,927 | <i>CECR1</i>         | -0.645267952 |
| 8,928 | <i>ARIH2</i>         | -0.644940866 |
| 8,929 | <i>SERPINI1</i>      | -0.644923717 |
| 8,930 | <i>CYP26B1</i>       | -0.64490611  |
| 8,931 | <i>PURG</i>          | -0.64483196  |
| 8,932 | <i>AGER</i>          | -0.644817644 |
| 8,933 | <i>RABEP1</i>        | -0.644812337 |
| 8,934 | <i>CA1</i>           | -0.643859667 |
| 8,935 | <i>SERTAD1</i>       | -0.643770387 |
| 8,936 | <i>FLJ90834</i>      | -0.643721785 |
| 8,937 | <i>MPHOSPH6</i>      | -0.6434961   |
| 8,938 | <i>OSTBETA</i>       | -0.643394301 |
| 8,939 | <i>ABCD4</i>         | -0.643085587 |
| 8,940 | <i>FLJ10986</i>      | -0.643051577 |
| 8,941 | <i>SLC4A1</i>        | -0.643006445 |
| 8,942 | <i>LOC389833</i>     | -0.64276411  |
| 8,943 | <i>C10ORF107</i>     | -0.642461751 |
| 8,944 | <i>FLJ20313</i>      | -0.642250575 |
| 8,945 | <i>ZWILCH</i>        | -0.642245964 |
| 8,946 | <i>OR10G8</i>        | -0.641987432 |
| 8,947 | <i>SYT14</i>         | -0.641809295 |
| 8,948 | <i>RASD1</i>         | -0.641774761 |
| 8,949 | <i>KCNK17</i>        | -0.641712686 |
| 8,950 | <i>KLF14</i>         | -0.641646171 |
| 8,951 | <i>DKFZP566C0424</i> | -0.641627195 |
| 8,952 | <i>PAX3</i>          | -0.641489439 |
| 8,953 | <i>ABCB5</i>         | -0.641440602 |
| 8,954 | <i>NONO</i>          | -0.64136343  |
| 8,955 | <i>ALPHA4GNT</i>     | -0.641156439 |
| 8,956 | <i>PIPOX</i>         | -0.641130056 |
| 8,957 | <i>RKHD3</i>         | -0.641102433 |
| 8,958 | <i>STAM2</i>         | -0.64110163  |
| 8,959 | <i>MGC23244</i>      | -0.641003662 |
| 8,960 | <i>KIAA0934</i>      | -0.640876446 |
| 8,961 | <i>MGC33214</i>      | -0.640724857 |
| 8,962 | <i>TSRC1</i>         | -0.640600629 |
| 8,963 | <i>GLYCTK</i>        | -0.640582933 |
| 8,964 | <i>TEX12</i>         | -0.640543455 |
| 8,965 | <i>EFEMP1</i>        | -0.640516015 |
| 8,966 | <i>TNFRSF19L</i>     | -0.640267088 |
| 8,967 | <i>KIAA0582</i>      | -0.640231844 |
| 8,968 | <i>MRPL45</i>        | -0.640165653 |

|       |                    |              |
|-------|--------------------|--------------|
| 8,969 | <i>ISL1</i>        | -0.640139191 |
| 8,970 | <i>DNAJB4</i>      | -0.640086669 |
| 8,971 | <i>LGALS2</i>      | -0.640085064 |
| 8,972 | <i>CRTAM</i>       | -0.639988448 |
| 8,973 | <i>MGC62094</i>    | -0.639937943 |
| 8,974 | <i>GPR119</i>      | -0.639844916 |
| 8,975 | <i>POLS</i>        | -0.639798769 |
| 8,976 | <i>FLJ13220</i>    | -0.639585423 |
| 8,977 | <i>TMEM16G</i>     | -0.639423704 |
| 8,978 | <i>TMEM16G</i>     | -0.639423704 |
| 8,979 | <i>DIAPH2</i>      | -0.639081162 |
| 8,980 | <i>ARRDC1</i>      | -0.639081162 |
| 8,981 | <i>IGSF2</i>       | -0.639038032 |
| 8,982 | <i>ADRM1</i>       | -0.638799298 |
| 8,983 | <i>TRIML1</i>      | -0.638737261 |
| 8,984 | <i>AGR2</i>        | -0.638731482 |
| 8,985 | <i>LIG1</i>        | -0.638705202 |
| 8,986 | <i>GSS</i>         | -0.638666605 |
| 8,987 | <i>CIRH1A</i>      | -0.638651163 |
| 8,988 | <i>NDUFB1</i>      | -0.638558844 |
| 8,989 | <i>TEAD1</i>       | -0.638553829 |
| 8,990 | <i>GIPC2</i>       | -0.638264769 |
| 8,991 | <i>SAMSN1</i>      | -0.637784348 |
| 8,992 | <i>TAS2R50</i>     | -0.637369764 |
| 8,993 | <i>C14ORF124</i>   | -0.637273122 |
| 8,994 | <i>VAC14</i>       | -0.637010865 |
| 8,995 | <i>OR1E2</i>       | -0.636959787 |
| 8,996 | <i>C1QA</i>        | -0.636952875 |
| 8,997 | <i>FA2H</i>        | -0.636827216 |
| 8,998 | <i>SLC24A1</i>     | -0.636700993 |
| 8,999 | <i>NS5ATP13TP2</i> | -0.636696813 |
| 9,000 | <i>ZNF592</i>      | -0.636688898 |
| 9,001 | <i>KIAA1036</i>    | -0.636424032 |
| 9,002 | <i>CEBPG</i>       | -0.636413705 |
| 9,003 | <i>NGFB</i>        | -0.636369127 |
| 9,004 | <i>HRH2</i>        | -0.636184818 |
| 9,005 | <i>LOC401647</i>   | -0.63617756  |
| 9,006 | <i>PER2</i>        | -0.636073958 |
| 9,007 | <i>ZNF431</i>      | -0.63598196  |
| 9,008 | <i>PEX11G</i>      | -0.635845269 |
| 9,009 | <i>CKLFSF7</i>     | -0.635784741 |
| 9,010 | <i>CKLFSF6</i>     | -0.635759372 |
| 9,011 | <i>UNC5B</i>       | -0.635706614 |
| 9,012 | <i>TFDP2</i>       | -0.635569138 |
| 9,013 | <i>OPHN1</i>       | -0.635496606 |
| 9,014 | <i>EPB41</i>       | -0.63545064  |
| 9,015 | <i>ATP8B3</i>      | -0.63507104  |



|       |                   |              |
|-------|-------------------|--------------|
| 9,016 | <i>NSDHL</i>      | -0.634812577 |
| 9,017 | <i>SNX26</i>      | -0.634665732 |
| 9,018 | <i>CYP2R1</i>     | -0.634650664 |
| 9,019 | <i>AVEN</i>       | -0.634361274 |
| 9,020 | <i>POMC</i>       | -0.634348912 |
| 9,021 | <i>POMC</i>       | -0.634348912 |
| 9,022 | <i>PIGS</i>       | -0.634327    |
| 9,023 | <i>FLJ14957</i>   | -0.634247582 |
| 9,024 | <i>TMSB4X</i>     | -0.634242287 |
| 9,025 | <i>LOC653192</i>  | -0.634162217 |
| 9,026 | <i>FOXD4</i>      | -0.633949849 |
| 9,027 | <i>POPDC2</i>     | -0.633497907 |
| 9,028 | <i>ELA2B</i>      | -0.633452998 |
| 9,029 | <i>MASK-BP3</i>   | -0.633303882 |
| 9,030 | <i>HBP17</i>      | -0.632853295 |
| 9,031 | <i>MRPS26</i>     | -0.632814696 |
| 9,032 | <i>ATP2B4</i>     | -0.632642802 |
| 9,033 | <i>CLDN23</i>     | -0.632461596 |
| 9,034 | <i>NRBF2</i>      | -0.63238689  |
| 9,035 | <i>RAB11-FIP3</i> | -0.632278258 |
| 9,036 | <i>RC3H2</i>      | -0.632088077 |
| 9,037 | <i>CMKLR1</i>     | -0.631924733 |
| 9,038 | <i>PCDHGA6</i>    | -0.631842037 |
| 9,039 | <i>MGC22679</i>   | -0.631799548 |
| 9,040 | <i>C18ORF26</i>   | -0.631750199 |
| 9,041 | <i>DMRT3</i>      | -0.631592282 |
| 9,042 | <i>C20ORF71</i>   | -0.631479944 |
| 9,043 | <i>ALS2CR13</i>   | -0.631407206 |
| 9,044 | <i>WDR26</i>      | -0.631403923 |
| 9,045 | <i>SURF4</i>      | -0.63118646  |
| 9,046 | <i>TAZ</i>        | -0.631094238 |
| 9,047 | <i>NDUFA6</i>     | -0.630947189 |
| 9,048 | <i>PEPP-2</i>     | -0.630668462 |
| 9,049 | <i>ZNF137</i>     | -0.630481386 |
| 9,050 | <i>LOC284018</i>  | -0.630461001 |
| 9,051 | <i>FLJ14639</i>   | -0.630333026 |
| 9,052 | <i>TINF2</i>      | -0.629974068 |
| 9,053 | <i>THRAP6</i>     | -0.629820955 |
| 9,054 | <i>ZNF319</i>     | -0.629808283 |
| 9,055 | <i>GNA15</i>      | -0.62973764  |
| 9,056 | <i>TAAR8</i>      | -0.629637054 |
| 9,057 | <i>FLJ41603</i>   | -0.629181986 |
| 9,058 | <i>NDRG3</i>      | -0.628928351 |
| 9,059 | <i>EIF3S5</i>     | -0.62889285  |
| 9,060 | <i>DNAJC9</i>     | -0.628803387 |
| 9,061 | <i>TCEAL1</i>     | -0.628719635 |
| 9,062 | <i>C14ORF143</i>  | -0.628690546 |

|       |                  |              |
|-------|------------------|--------------|
| 9,063 | <i>FBXO3</i>     | -0.628643877 |
| 9,064 | <i>KIF21B</i>    | -0.62862851  |
| 9,065 | <i>MAP3K14</i>   | -0.628603695 |
| 9,066 | <i>KCTD17</i>    | -0.628531421 |
| 9,067 | <i>MGC33510</i>  | -0.628297119 |
| 9,068 | <i>ACN9</i>      | -0.628282371 |
| 9,069 | <i>C2ORF27</i>   | -0.628270408 |
| 9,070 | <i>SP6</i>       | -0.628238013 |
| 9,071 | <i>KCTD1</i>     | -0.628075237 |
| 9,072 | <i>WBSCR18</i>   | -0.627871967 |
| 9,073 | <i>RRN3</i>      | -0.627212941 |
| 9,074 | <i>GHITM</i>     | -0.62720249  |
| 9,075 | <i>H2-ALPHA</i>  | -0.627173965 |
| 9,076 | <i>FBXL22</i>    | -0.626999175 |
| 9,077 | <i>CALML5</i>    | -0.626989029 |
| 9,078 | <i>SLAMF9</i>    | -0.626667393 |
| 9,079 | <i>FLJ35220</i>  | -0.6266097   |
| 9,080 | <i>SNRPE</i>     | -0.626498744 |
| 9,081 | <i>RPA1</i>      | -0.626435739 |
| 9,082 | <i>THUMPD1</i>   | -0.626396962 |
| 9,083 | <i>OSRF</i>      | -0.626285686 |
| 9,084 | <i>GAGE8</i>     | -0.626252849 |
| 9,085 | <i>SP1</i>       | -0.625965147 |
| 9,086 | <i>LBR</i>       | -0.625893631 |
| 9,087 | <i>WBSCR14</i>   | -0.625624584 |
| 9,088 | <i>DZIP3</i>     | -0.625481444 |
| 9,089 | <i>SLC16A3</i>   | -0.625361529 |
| 9,090 | <i>NKX2-5</i>    | -0.625141923 |
| 9,091 | <i>EGF</i>       | -0.624994175 |
| 9,092 | <i>PKP2</i>      | -0.624799192 |
| 9,093 | <i>FLJ21934</i>  | -0.624796864 |
| 9,094 | <i>SLC6A12</i>   | -0.624447499 |
| 9,095 | <i>LAMC1</i>     | -0.624424816 |
| 9,096 | <i>GALE</i>      | -0.624382101 |
| 9,097 | <i>RBM15</i>     | -0.624152847 |
| 9,098 | <i>THY1</i>      | -0.624130643 |
| 9,099 | <i>C14ORF73</i>  | -0.623932266 |
| 9,100 | <i>INHBC</i>     | -0.62387452  |
| 9,101 | <i>ZNF558</i>    | -0.623866065 |
| 9,102 | <i>UPF3B</i>     | -0.623621981 |
| 9,103 | <i>FLJ12519</i>  | -0.623592072 |
| 9,104 | <i>TSP-NY</i>    | -0.623588049 |
| 9,105 | <i>LOC253012</i> | -0.623524537 |
| 9,106 | <i>MAN2B1</i>    | -0.623480534 |
| 9,107 | <i>HSA9761</i>   | -0.62323338  |
| 9,108 | <i>KCTD8</i>     | -0.62314882  |
| 9,109 | <i>ATPAF1</i>    | -0.623146125 |

|       |                  |              |
|-------|------------------|--------------|
| 9,110 | <i>CTH</i>       | -0.623074931 |
| 9,111 | <i>C7ORF10</i>   | -0.622901634 |
| 9,112 | <i>FLJ32312</i>  | -0.622863858 |
| 9,113 | <i>FLJ32312</i>  | -0.622863858 |
| 9,114 | <i>VDAC1</i>     | -0.622297351 |
| 9,115 | <i>BAZ2B</i>     | -0.622196087 |
| 9,116 | <i>SIRT6</i>     | -0.621978844 |
| 9,117 | <i>PRSS8</i>     | -0.621968935 |
| 9,118 | <i>FLJ20345</i>  | -0.621961976 |
| 9,119 | <i>CDH13</i>     | -0.621870393 |
| 9,120 | <i>CTBP1</i>     | -0.621822237 |
| 9,121 | <i>DNAI2</i>     | -0.621814679 |
| 9,122 | <i>FLJ13621</i>  | -0.621745537 |
| 9,123 | <i>AKR1C2</i>    | -0.621624579 |
| 9,124 | <i>BCAR3</i>     | -0.621406423 |
| 9,125 | <i>AMBN</i>      | -0.621130197 |
| 9,126 | <i>AXL</i>       | -0.621047636 |
| 9,127 | <i>FBN3</i>      | -0.620905885 |
| 9,128 | <i>GPR73L1</i>   | -0.620851265 |
| 9,129 | <i>C6ORF203</i>  | -0.620808363 |
| 9,130 | <i>ERCC6</i>     | -0.620805142 |
| 9,131 | <i>CD151</i>     | -0.620798111 |
| 9,132 | <i>DEFA1</i>     | -0.620679795 |
| 9,133 | <i>TRPV2</i>     | -0.620330487 |
| 9,134 | <i>KIF23</i>     | -0.620325394 |
| 9,135 | <i>NOLA3</i>     | -0.62016907  |
| 9,136 | <i>C2ORF13</i>   | -0.620039484 |
| 9,137 | <i>PRO1853</i>   | -0.619989658 |
| 9,138 | <i>FLJ14050</i>  | -0.619880396 |
| 9,139 | <i>MFN2</i>      | -0.619798446 |
| 9,140 | <i>USP22</i>     | -0.619676627 |
| 9,141 | <i>HAK</i>       | -0.619663158 |
| 9,142 | <i>CSMD1</i>     | -0.61953438  |
| 9,143 | <i>MCOLN3</i>    | -0.619506736 |
| 9,144 | <i>STAU2</i>     | -0.619329336 |
| 9,145 | <i>LOC388272</i> | -0.619171197 |
| 9,146 | <i>TAF5</i>      | -0.61876597  |
| 9,147 | <i>C10ORF95</i>  | -0.618760893 |
| 9,148 | <i>PLEKHE1</i>   | -0.618713943 |
| 9,149 | <i>SCPEP1</i>    | -0.618617588 |
| 9,150 | <i>KIAA0298</i>  | -0.618578048 |
| 9,151 | <i>CSS3</i>      | -0.618547743 |
| 9,152 | <i>AKR1C3</i>    | -0.618111068 |
| 9,153 | <i>REN</i>       | -0.618048612 |
| 9,154 | <i>LRRC16</i>    | -0.617766952 |
| 9,155 | <i>LOC253827</i> | -0.617729748 |
| 9,156 | <i>GPSM1</i>     | -0.61745948  |

|       |                  |              |
|-------|------------------|--------------|
| 9,157 | <i>NUP50</i>     | -0.617455453 |
| 9,158 | <i>ABCF1</i>     | -0.617403232 |
| 9,159 | <i>NKTR</i>      | -0.617315157 |
| 9,160 | <i>UACA</i>      | -0.617254878 |
| 9,161 | <i>UACA</i>      | -0.617254878 |
| 9,162 | <i>FLJ45831</i>  | -0.617096264 |
| 9,163 | <i>COLEC12</i>   | -0.616987784 |
| 9,164 | <i>COLEC12</i>   | -0.616987784 |
| 9,165 | <i>NAGPA</i>     | -0.616963821 |
| 9,166 | <i>ARID5B</i>    | -0.61686138  |
| 9,167 | <i>GLRX2</i>     | -0.616114293 |
| 9,168 | <i>ZP1</i>       | -0.616058468 |
| 9,169 | <i>LOC120526</i> | -0.616027207 |
| 9,170 | <i>MGC39558</i>  | -0.615847602 |
| 9,171 | <i>MGC14839</i>  | -0.615756255 |
| 9,172 | <i>DEFB106</i>   | -0.61554936  |
| 9,173 | <i>DGAT1</i>     | -0.615412472 |
| 9,174 | <i>NSE2</i>      | -0.615304475 |
| 9,175 | <i>RNASE6</i>    | -0.615288362 |
| 9,176 | <i>LOC338949</i> | -0.615266785 |
| 9,177 | <i>PKD2L2</i>    | -0.615168669 |
| 9,178 | <i>DESR1</i>     | -0.615108654 |
| 9,179 | <i>LOC124446</i> | -0.615020407 |
| 9,180 | <i>HECW2</i>     | -0.614790301 |
| 9,181 | <i>KRTAP13-2</i> | -0.614741951 |
| 9,182 | <i>DUSP5</i>     | -0.614723407 |
| 9,183 | <i>HDAC10</i>    | -0.61469236  |
| 9,184 | <i>CNOT7</i>     | -0.614656897 |
| 9,185 | <i>STC1</i>      | -0.614262245 |
| 9,186 | <i>NEF3</i>      | -0.613933813 |
| 9,187 | <i>IL13</i>      | -0.613863973 |
| 9,188 | <i>RBBP6</i>     | -0.613817808 |
| 9,189 | <i>TPSD1</i>     | -0.613698854 |
| 9,190 | <i>AMY2A</i>     | -0.613686374 |
| 9,191 | <i>GSTT1</i>     | -0.613675711 |
| 9,192 | <i>NR2F2</i>     | -0.613550853 |
| 9,193 | <i>ATP1A3</i>    | -0.613241014 |
| 9,194 | <i>BIRC7</i>     | -0.612694623 |
| 9,195 | <i>EPHX2</i>     | -0.61257961  |
| 9,196 | <i>UNC93B1</i>   | -0.612546423 |
| 9,197 | <i>MGC11308</i>  | -0.612537168 |
| 9,198 | <i>HPSE2</i>     | -0.612523271 |
| 9,199 | <i>LOC51249</i>  | -0.612175461 |
| 9,200 | <i>PARC</i>      | -0.612140524 |
| 9,201 | <i>C14ORF168</i> | -0.61198768  |
| 9,202 | <i>TACSTD1</i>   | -0.611787523 |
| 9,203 | <i>ZNF432</i>    | -0.611731667 |

|       |                      |              |
|-------|----------------------|--------------|
| 9,204 | <i>KRTAP8-1</i>      | -0.611705705 |
| 9,205 | <i>DKFZP761E198</i>  | -0.6117042   |
| 9,206 | <i>ZFPM2</i>         | -0.611699249 |
| 9,207 | <i>COL6A3</i>        | -0.611642898 |
| 9,208 | <i>UBE2G1</i>        | -0.61153058  |
| 9,209 | <i>MYCL1</i>         | -0.61139572  |
| 9,210 | <i>ZNF471</i>        | -0.611277505 |
| 9,211 | <i>PLAC4</i>         | -0.611277505 |
| 9,212 | <i>LOC339324</i>     | -0.611171258 |
| 9,213 | <i>XRCC1</i>         | -0.610753701 |
| 9,214 | <i>DPYSL3</i>        | -0.61052416  |
| 9,215 | <i>GPR26</i>         | -0.610508788 |
| 9,216 | <i>CDK5R2</i>        | -0.610426947 |
| 9,217 | <i>FLJ38819</i>      | -0.610399418 |
| 9,218 | <i>EBI3</i>          | -0.610362989 |
| 9,219 | <i>LOC340359</i>     | -0.610359835 |
| 9,220 | <i>CDK2</i>          | -0.610117388 |
| 9,221 | <i>PTCH2</i>         | -0.609998952 |
| 9,222 | <i>AGPAT1</i>        | -0.609960613 |
| 9,223 | <i>OR2T6</i>         | -0.609959414 |
| 9,224 | <i>VAX1</i>          | -0.609818532 |
| 9,225 | <i>GPKOW</i>         | -0.609736186 |
| 9,226 | <i>CELSR1</i>        | -0.609629926 |
| 9,227 | <i>RNASEH1</i>       | -0.609579059 |
| 9,228 | <i>FKBP11</i>        | -0.609566471 |
| 9,229 | <i>KCNJ13</i>        | -0.609551399 |
| 9,230 | <i>LOC440957</i>     | -0.609488405 |
| 9,231 | <i>FLJ46321</i>      | -0.60944246  |
| 9,232 | <i>RPF1</i>          | -0.609086987 |
| 9,233 | <i>LOC401387</i>     | -0.608984896 |
| 9,234 | <i>DKFZP564O123</i>  | -0.608969261 |
| 9,235 | <i>GDF11</i>         | -0.608878905 |
| 9,236 | <i>PJA2</i>          | -0.608774704 |
| 9,237 | <i>CRIP1</i>         | -0.60863821  |
| 9,238 | <i>RAB33B</i>        | -0.608592803 |
| 9,239 | <i>KIAA0143</i>      | -0.608559251 |
| 9,240 | <i>FOXD3</i>         | -0.608471535 |
| 9,241 | <i>CNNM2</i>         | -0.608416627 |
| 9,242 | <i>BLOC1S2</i>       | -0.608365911 |
| 9,243 | <i>DKFZP434O0213</i> | -0.60829852  |
| 9,244 | <i>KENAE</i>         | -0.608160427 |
| 9,245 | <i>FLJ40342</i>      | -0.608018679 |
| 9,246 | <i>C20ORF43</i>      | -0.60791973  |
| 9,247 | <i>MS4A6A</i>        | -0.607907609 |
| 9,248 | <i>ACP2</i>          | -0.607879883 |
| 9,249 | <i>CD44</i>          | -0.60778258  |
| 9,250 | <i>DUSP21</i>        | -0.607724348 |

|       |                     |              |
|-------|---------------------|--------------|
| 9,251 | <i>H3F3B</i>        | -0.607650513 |
| 9,252 | <i>C6ORF152</i>     | -0.60759257  |
| 9,253 | <i>BRMS1</i>        | -0.607249671 |
| 9,254 | <i>SHC3</i>         | -0.606940257 |
| 9,255 | <i>OR6C70</i>       | -0.606876095 |
| 9,256 | <i>TEP1</i>         | -0.606786357 |
| 9,257 | <i>DAZ4</i>         | -0.606716762 |
| 9,258 | <i>FPGT</i>         | -0.606130399 |
| 9,259 | <i>PAM</i>          | -0.605915295 |
| 9,260 | <i>POTE2</i>        | -0.605715272 |
| 9,261 | <i>MAGEA9</i>       | -0.605665147 |
| 9,262 | <i>NAALADL1</i>     | -0.605563414 |
| 9,263 | <i>GAS2L1</i>       | -0.605497027 |
| 9,264 | <i>SCNN1G</i>       | -0.605339976 |
| 9,265 | <i>UXS1</i>         | -0.605071378 |
| 9,266 | <i>TBC1D17</i>      | -0.605042573 |
| 9,267 | <i>ZNF543</i>       | -0.604906502 |
| 9,268 | <i>FLJ44112</i>     | -0.604676603 |
| 9,269 | <i>TOP3A</i>        | -0.604658687 |
| 9,270 | <i>CRTC1</i>        | -0.60456555  |
| 9,271 | <i>CUL7</i>         | -0.604534894 |
| 9,272 | <i>TOR3A</i>        | -0.604526331 |
| 9,273 | <i>LOC144347</i>    | -0.604487691 |
| 9,274 | <i>DEPDC4</i>       | -0.604479047 |
| 9,275 | <i>RNU3IP2</i>      | -0.60441798  |
| 9,276 | <i>COL8A1</i>       | -0.604409933 |
| 9,277 | <i>OR4C15</i>       | -0.604113363 |
| 9,278 | <i>FLJ25070</i>     | -0.603887182 |
| 9,279 | <i>KLHDC3</i>       | -0.603792605 |
| 9,280 | <i>LOC146713</i>    | -0.603662141 |
| 9,281 | <i>FBXO9</i>        | -0.603638154 |
| 9,282 | <i>MGC15416</i>     | -0.603562427 |
| 9,283 | <i>KILLIN</i>       | -0.603402908 |
| 9,284 | <i>SSX1</i>         | -0.603288406 |
| 9,285 | <i>MLL2</i>         | -0.603274945 |
| 9,286 | <i>LEMD2</i>        | -0.603233821 |
| 9,287 | <i>CBFA2T1</i>      | -0.602886433 |
| 9,288 | <i>OR51B4</i>       | -0.602867573 |
| 9,289 | <i>FLJ20277</i>     | -0.602686741 |
| 9,290 | <i>ABCB11</i>       | -0.602422282 |
| 9,291 | <i>DEFB127</i>      | -0.602390504 |
| 9,292 | <i>MLH1</i>         | -0.602346316 |
| 9,293 | <i>MGC19780</i>     | -0.60234482  |
| 9,294 | <i>RP11-56A21.1</i> | -0.602325389 |
| 9,295 | <i>FLJ12787</i>     | -0.602265866 |
| 9,296 | <i>VMD2L1</i>       | -0.602265866 |
| 9,297 | <i>ZNF264</i>       | -0.602173726 |

|       |                  |              |
|-------|------------------|--------------|
| 9,298 | <i>LOC283871</i> | -0.602076131 |
| 9,299 | <i>NCR2</i>      | -0.602017539 |
| 9,300 | <i>KRTHA3B</i>   | -0.601910357 |
| 9,301 | <i>KIAA1443</i>  | -0.601884945 |
| 9,302 | <i>COPS4</i>     | -0.601826637 |
| 9,303 | <i>PIK3CB</i>    | -0.601782034 |
| 9,304 | <i>ZFYVE16</i>   | -0.601693868 |
| 9,305 | <i>KIAA0893</i>  | -0.601234259 |
| 9,306 | <i>PIP5K2A</i>   | -0.600741481 |
| 9,307 | <i>SKIP</i>      | -0.600442201 |
| 9,308 | <i>DBP</i>       | -0.600148345 |
| 9,309 | <i>C8B</i>       | -0.600107842 |
| 9,310 | <i>PAPD5</i>     | -0.600044163 |
| 9,311 | <i>ZNF606</i>    | -0.599960085 |
| 9,312 | <i>SLC1A6</i>    | -0.59995504  |
| 9,313 | <i>MPST</i>      | -0.599873058 |
| 9,314 | <i>NMU</i>       | -0.59978093  |
| 9,315 | <i>P4HA3</i>     | -0.599774114 |
| 9,316 | <i>HPCAL4</i>    | -0.59968268  |
| 9,317 | <i>PEX26</i>     | -0.599679325 |
| 9,318 | <i>C6ORF107</i>  | -0.599669337 |
| 9,319 | <i>PLA2G4B</i>   | -0.599588633 |
| 9,320 | <i>NPC2</i>      | -0.599351272 |
| 9,321 | <i>RHOJ</i>      | -0.599340658 |
| 9,322 | <i>SYMPK</i>     | -0.598943023 |
| 9,323 | <i>ADCY7</i>     | -0.598865879 |
| 9,324 | <i>TNNI3</i>     | -0.598816079 |
| 9,325 | <i>SNX13</i>     | -0.598740286 |
| 9,326 | <i>FLJ10613</i>  | -0.598737517 |
| 9,327 | <i>KBTBD10</i>   | -0.598454933 |
| 9,328 | <i>HRB</i>       | -0.598436166 |
| 9,329 | <i>CSF3R</i>     | -0.598335016 |
| 9,330 | <i>FBXO4</i>     | -0.59797019  |
| 9,331 | <i>IL23R</i>     | -0.59787499  |
| 9,332 | <i>FLJ38281</i>  | -0.597722233 |
| 9,333 | <i>FLJ21159</i>  | -0.597618557 |
| 9,334 | <i>NMNAT1</i>    | -0.597580518 |
| 9,335 | <i>KIAA2010</i>  | -0.597576613 |
| 9,336 | <i>PCNA</i>      | -0.597542798 |
| 9,337 | <i>FLJ34922</i>  | -0.597534367 |
| 9,338 | <i>SEC14L4</i>   | -0.597459591 |
| 9,339 | <i>MRPS10</i>    | -0.597295745 |
| 9,340 | <i>FLJ32786</i>  | -0.596829988 |
| 9,341 | <i>RNF4</i>      | -0.596569381 |
| 9,342 | <i>ELOVL4</i>    | -0.59625776  |
| 9,343 | <i>BAG2</i>      | -0.596245438 |
| 9,344 | <i>DEFB104B</i>  | -0.596217379 |

|       |               |              |
|-------|---------------|--------------|
| 9,345 | IDH3A         | -0.595949557 |
| 9,346 | SMARCC1       | -0.595819696 |
| 9,347 | LOC338645     | -0.595817471 |
| 9,348 | SLC34A2       | -0.595610319 |
| 9,349 | OR7G3         | -0.594978051 |
| 9,350 | SLC29A2       | -0.594848619 |
| 9,351 | MMP17         | -0.594582214 |
| 9,352 | C22ORF5       | -0.594480695 |
| 9,353 | ZIM2          | -0.594475316 |
| 9,354 | BDNF          | -0.594419488 |
| 9,355 | ZFP95         | -0.594206775 |
| 9,356 | SLC6A20       | -0.594094524 |
| 9,357 | CNTNAP1       | -0.59405473  |
| 9,358 | BRCA2         | -0.593980125 |
| 9,359 | TP53I3        | -0.593946755 |
| 9,360 | GPR39         | -0.593835005 |
| 9,361 | GTF3C5        | -0.593824752 |
| 9,362 | C10ORF81      | -0.593646747 |
| 9,363 | JUP           | -0.59361988  |
| 9,364 | LRRC3         | -0.593608134 |
| 9,365 | MRPL38        | -0.593575874 |
| 9,366 | MSR1          | -0.593436431 |
| 9,367 | C1QTNF4       | -0.593424234 |
| 9,368 | DKFZP434L0117 | -0.593379947 |
| 9,369 | PLP1          | -0.593261243 |
| 9,370 | HSPC049       | -0.593197188 |
| 9,371 | SLC30A6       | -0.593105591 |
| 9,372 | BAT2D1        | -0.592982115 |
| 9,373 | LASS1         | -0.592919379 |
| 9,374 | LMO4          | -0.592736618 |
| 9,375 | FLJ22313      | -0.592733347 |
| 9,376 | CTAG1B        | -0.592540833 |
| 9,377 | GSTT2         | -0.592340386 |
| 9,378 | PTPN18        | -0.59232642  |
| 9,379 | ATP5C1        | -0.592307361 |
| 9,380 | KCTD6         | -0.592137544 |
| 9,381 | SLC20A1       | -0.592079476 |
| 9,382 | RP6-213H19.1  | -0.591893645 |
| 9,383 | OR52H1        | -0.591880922 |
| 9,384 | OR52H1        | -0.591880922 |
| 9,385 | DNAJC10       | -0.591550565 |
| 9,386 | NDUFB9        | -0.591546333 |
| 9,387 | RNF182        | -0.591484062 |
| 9,388 | FLJ38822      | -0.590998156 |
| 9,389 | GAGE6         | -0.590923629 |
| 9,390 | NCOA6         | -0.590872225 |
| 9,391 | DLGAP2        | -0.590748482 |



|       |          |              |
|-------|----------|--------------|
| 9,392 | ALG1     | -0.590636707 |
| 9,393 | PREX1    | -0.590555243 |
| 9,394 | SOX5     | -0.590245766 |
| 9,395 | GATAD1   | -0.590016021 |
| 9,396 | TIGD6    | -0.589899356 |
| 9,397 | OR7E24   | -0.58985756  |
| 9,398 | ZNF46    | -0.589843568 |
| 9,399 | CSHL1    | -0.589726781 |
| 9,400 | FLJ11752 | -0.589715357 |
| 9,401 | OR5B21   | -0.589669448 |
| 9,402 | CABLES2  | -0.589663678 |
| 9,403 | FLJ23878 | -0.589584866 |
| 9,404 | VPS24    | -0.589351369 |
| 9,405 | PTGER3   | -0.589233429 |
| 9,406 | FBXL7    | -0.58896813  |
| 9,407 | SCA1     | -0.588911129 |
| 9,408 | KIAA1914 | -0.588742808 |
| 9,409 | ABHD2    | -0.58873867  |
| 9,410 | IRS2     | -0.588599735 |
| 9,411 | TRFP     | -0.588415847 |
| 9,412 | GPR18    | -0.588070244 |
| 9,413 | ZNF354A  | -0.588068873 |
| 9,414 | HNRPM    | -0.58789093  |
| 9,415 | TRA2A    | -0.587846088 |
| 9,416 | BAD      | -0.58771501  |
| 9,417 | TIMP2    | -0.587356999 |
| 9,418 | TIAF1    | -0.587287272 |
| 9,419 | MMP15    | -0.587044792 |
| 9,420 | HMX1     | -0.586973637 |
| 9,421 | IGF1R    | -0.586933295 |
| 9,422 | IL4      | -0.586867644 |
| 9,423 | PYGO2    | -0.586682934 |
| 9,424 | LAPTM4B  | -0.586643248 |
| 9,425 | LCE1B    | -0.586515407 |
| 9,426 | FOXO3A   | -0.586462261 |
| 9,427 | FOXJ3    | -0.586275626 |
| 9,428 | PZP      | -0.586235242 |
| 9,429 | MRPL1    | -0.586148696 |
| 9,430 | DOCK11   | -0.586116289 |
| 9,431 | LIMK1    | -0.585871542 |
| 9,432 | MTF      | -0.58567218  |
| 9,433 | ATP6V0A1 | -0.585671708 |
| 9,434 | SPIN1    | -0.585566941 |
| 9,435 | FMN2     | -0.585467185 |
| 9,436 | C9ORF19  | -0.58543766  |
| 9,437 | KLHL15   | -0.585400602 |
| 9,438 | GADD45A  | -0.585381766 |

|       |                     |              |
|-------|---------------------|--------------|
| 9,439 | <i>NUDT10</i>       | -0.585208929 |
| 9,440 | <i>FLJ42117</i>     | -0.585013578 |
| 9,441 | <i>KIAA0582</i>     | -0.584420905 |
| 9,442 | <i>LOC126075</i>    | -0.584162197 |
| 9,443 | <i>PHF13</i>        | -0.58415854  |
| 9,444 | <i>VMD2</i>         | -0.584122067 |
| 9,445 | <i>CDC10</i>        | -0.584024836 |
| 9,446 | <i>HEXO</i>         | -0.583574936 |
| 9,447 | <i>LOC374946</i>    | -0.583524009 |
| 9,448 | <i>SLC2A11</i>      | -0.58343297  |
| 9,449 | <i>PARP1</i>        | -0.583316269 |
| 9,450 | <i>MRPL28</i>       | -0.583274732 |
| 9,451 | <i>MYO9B</i>        | -0.583106043 |
| 9,452 | <i>PGAM2</i>        | -0.582994342 |
| 9,453 | <i>PKD2</i>         | -0.582987095 |
| 9,454 | <i>ZF</i>           | -0.582869071 |
| 9,455 | <i>DKFZP572C163</i> | -0.582639432 |
| 9,456 | <i>KLHL3</i>        | -0.582584939 |
| 9,457 | <i>SIGIRR</i>       | -0.582569849 |
| 9,458 | <i>TNFRSF7</i>      | -0.582523866 |
| 9,459 | <i>HIG2</i>         | -0.582518754 |
| 9,460 | <i>TRIM52</i>       | -0.582496244 |
| 9,461 | <i>DDX26</i>        | -0.582434775 |
| 9,462 | <i>SIDT2</i>        | -0.582299691 |
| 9,463 | <i>CTGLF4</i>       | -0.582259219 |
| 9,464 | <i>RG9MTD2</i>      | -0.58215445  |
| 9,465 | <i>TMEM2</i>        | -0.582079132 |
| 9,466 | <i>SPESP1</i>       | -0.58200482  |
| 9,467 | <i>PCQAP</i>        | -0.581845585 |
| 9,468 | <i>C6ORF139</i>     | -0.581710923 |
| 9,469 | <i>MTMR8</i>        | -0.581658765 |
| 9,470 | <i>RBM35B</i>       | -0.581399228 |
| 9,471 | <i>FH</i>           | -0.581222371 |
| 9,472 | <i>ERG</i>          | -0.581180835 |
| 9,473 | <i>HIBCH</i>        | -0.581169672 |
| 9,474 | <i>WARP</i>         | -0.581038419 |
| 9,475 | <i>FLJ33318</i>     | -0.580609031 |
| 9,476 | <i>OGFRL1</i>       | -0.58031741  |
| 9,477 | <i>FLJ10159</i>     | -0.58014713  |
| 9,478 | <i>AP1S1</i>        | -0.580068827 |
| 9,479 | <i>MGC10772</i>     | -0.579782993 |
| 9,480 | <i>COL17A1</i>      | -0.579776258 |
| 9,481 | <i>NACSIN</i>       | -0.579761607 |
| 9,482 | <i>RRAGA</i>        | -0.579679874 |
| 9,483 | <i>ARMCX1</i>       | -0.579606403 |
| 9,484 | <i>POU3F2</i>       | -0.579582916 |
| 9,485 | <i>NDUFA4</i>       | -0.57948572  |

|       |                  |              |
|-------|------------------|--------------|
| 9,486 | <i>CUGBP1</i>    | -0.579093848 |
| 9,487 | <i>HABP2</i>     | -0.578831692 |
| 9,488 | <i>C1ORF22</i>   | -0.578704113 |
| 9,489 | <i>LOC340602</i> | -0.578675224 |
| 9,490 | <i>PBX4</i>      | -0.578472928 |
| 9,491 | <i>APOL3</i>     | -0.578299499 |
| 9,492 | <i>ASH1L</i>     | -0.578243918 |
| 9,493 | <i>NYD-SP26</i>  | -0.578234942 |
| 9,494 | <i>MGC26718</i>  | -0.578197806 |
| 9,495 | <i>HT008</i>     | -0.578032985 |
| 9,496 | <i>TMED9</i>     | -0.577931374 |
| 9,497 | <i>OVTN</i>      | -0.577894558 |
| 9,498 | <i>PSG6</i>      | -0.57789305  |
| 9,499 | <i>C10ORF129</i> | -0.577814865 |
| 9,500 | <i>PGR</i>       | -0.577734802 |
| 9,501 | <i>MAGEA8</i>    | -0.577713762 |
| 9,502 | <i>ALOX15B</i>   | -0.577682491 |
| 9,503 | <i>TERF1</i>     | -0.577603988 |
| 9,504 | <i>DCNP1</i>     | -0.577163296 |
| 9,505 | <i>FLJ11273</i>  | -0.577124276 |
| 9,506 | <i>PLCB1</i>     | -0.577008434 |
| 9,507 | <i>FLJ11151</i>  | -0.576683491 |
| 9,508 | <i>DCLRE1C</i>   | -0.576573842 |
| 9,509 | <i>MAP3K8</i>    | -0.576536543 |
| 9,510 | <i>SCNN1B</i>    | -0.57650928  |
| 9,511 | <i>ROBO4</i>     | -0.576381645 |
| 9,512 | <i>MAL</i>       | -0.576337955 |
| 9,513 | <i>FLJ39370</i>  | -0.576191213 |
| 9,514 | <i>BACH</i>      | -0.576118418 |
| 9,515 | <i>KLHL14</i>    | -0.576101143 |
| 9,516 | <i>TM4SF4</i>    | -0.575960729 |
| 9,517 | <i>HLA-DPB1</i>  | -0.57573012  |
| 9,518 | <i>LOC161931</i> | -0.575617932 |
| 9,519 | <i>CCHCR1</i>    | -0.57561228  |
| 9,520 | <i>CNNM3</i>     | -0.575592049 |
| 9,521 | <i>JUNB</i>      | -0.575511169 |
| 9,522 | <i>CD209</i>     | -0.575506593 |
| 9,523 | <i>CBFB</i>      | -0.575499334 |
| 9,524 | <i>VCX2</i>      | -0.575195852 |
| 9,525 | <i>FLJ39827</i>  | -0.575090019 |
| 9,526 | <i>HERC2</i>     | -0.575050598 |
| 9,527 | <i>SCARB2</i>    | -0.574742206 |
| 9,528 | <i>CHRD12</i>    | -0.574669575 |
| 9,529 | <i>ELAVL3</i>    | -0.574638604 |
| 9,530 | <i>CLCN1</i>     | -0.574627703 |
| 9,531 | <i>ABCA1</i>     | -0.574528425 |
| 9,532 | <i>ELA2</i>      | -0.574525389 |

|       |               |              |
|-------|---------------|--------------|
| 9,533 | ZNF19         | -0.574274452 |
| 9,534 | DKFZP434K046  | -0.574168201 |
| 9,535 | SOC           | -0.574168201 |
| 9,536 | SENP6         | -0.574081991 |
| 9,537 | MAGEA2        | -0.573995718 |
| 9,538 | SULT1B1       | -0.573950911 |
| 9,539 | IL28RA        | -0.573883576 |
| 9,540 | BCMO1         | -0.573595403 |
| 9,541 | PRDX3         | -0.573402928 |
| 9,542 | OR12D3        | -0.573240895 |
| 9,543 | OATL1         | -0.573197626 |
| 9,544 | C21ORF18      | -0.573009963 |
| 9,545 | C20ORF32      | -0.572947882 |
| 9,546 | IGFL2         | -0.572928011 |
| 9,547 | ZNF423        | -0.572735672 |
| 9,548 | C6ORF105      | -0.572705339 |
| 9,549 | ABLIM1        | -0.572652965 |
| 9,550 | FDX1          | -0.572569913 |
| 9,551 | LOC284001     | -0.572390559 |
| 9,552 | ACATE2        | -0.57230217  |
| 9,553 | C6ORF83       | -0.571983681 |
| 9,554 | LOC150786     | -0.57193525  |
| 9,555 | GIPC1         | -0.571848851 |
| 9,556 | GIPC1         | -0.571848851 |
| 9,557 | MATN1         | -0.571308637 |
| 9,558 | AVPI1         | -0.571193975 |
| 9,559 | LOC129138     | -0.571138748 |
| 9,560 | RPE65         | -0.570935429 |
| 9,561 | ZNFN1A2       | -0.570815448 |
| 9,562 | LOC284058     | -0.570741578 |
| 9,563 | FLJ22624      | -0.570729903 |
| 9,564 | RPL13         | -0.570457589 |
| 9,565 | BMF           | -0.570443713 |
| 9,566 | LOC255189     | -0.570354179 |
| 9,567 | RPP21         | -0.570202394 |
| 9,568 | LOC100132247  | -0.57017992  |
| 9,569 | LMNA          | -0.570152407 |
| 9,570 | KIN           | -0.570041    |
| 9,571 | RSC1A1        | -0.570018991 |
| 9,572 | DKFZP586M1819 | -0.56998199  |
| 9,573 | PPIL4         | -0.569899409 |
| 9,574 | C13ORF24      | -0.569720298 |
| 9,575 | ADFP          | -0.56961091  |
| 9,576 | SLC9A9        | -0.569439627 |
| 9,577 | RPS6KA1       | -0.569433703 |
| 9,578 | CLCA3         | -0.569372198 |
| 9,579 | TOCA1         | -0.569160233 |

|       |                     |              |
|-------|---------------------|--------------|
| 9,580 | <i>SMO</i>          | -0.569079043 |
| 9,581 | <i>HOMER2</i>       | -0.569062121 |
| 9,582 | <i>TSPAN5</i>       | -0.56904093  |
| 9,583 | <i>SEMA3C</i>       | -0.568524135 |
| 9,584 | <i>LOC113655</i>    | -0.568519285 |
| 9,585 | <i>EIF3S8</i>       | -0.568440248 |
| 9,586 | <i>BAZ1B</i>        | -0.568429872 |
| 9,587 | <i>FLJ20294</i>     | -0.568340577 |
| 9,588 | <i>CA8</i>          | -0.568262534 |
| 9,589 | <i>FKBP1B</i>       | -0.568261514 |
| 9,590 | <i>APOA1</i>        | -0.56819023  |
| 9,591 | <i>SURB7</i>        | -0.568076134 |
| 9,592 | <i>C6ORF64</i>      | -0.567822077 |
| 9,593 | <i>DKFZP547A023</i> | -0.567648214 |
| 9,594 | <i>FYN</i>          | -0.567575004 |
| 9,595 | <i>KCNIP2</i>       | -0.567521847 |
| 9,596 | <i>MLH3</i>         | -0.567379054 |
| 9,597 | <i>HESX1</i>        | -0.567100307 |
| 9,598 | <i>FLJ10211</i>     | -0.566900446 |
| 9,599 | <i>MCF2</i>         | -0.566776847 |
| 9,600 | <i>EI24</i>         | -0.566755644 |
| 9,601 | <i>DSCAML1</i>      | -0.565983435 |
| 9,602 | <i>ADM2</i>         | -0.565975564 |
| 9,603 | <i>SLC16A7</i>      | -0.565783978 |
| 9,604 | <i>DMRTA1</i>       | -0.565682778 |
| 9,605 | <i>MDS018</i>       | -0.565619751 |
| 9,606 | <i>ABCB1</i>        | -0.565250298 |
| 9,607 | <i>FLJ23825</i>     | -0.565219217 |
| 9,608 | <i>PPYR1</i>        | -0.565063603 |
| 9,609 | <i>SMARCB1</i>      | -0.565002466 |
| 9,610 | <i>FLJ90396</i>     | -0.564824106 |
| 9,611 | <i>C20ORF45</i>     | -0.564688257 |
| 9,612 | <i>CABP2</i>        | -0.564665025 |
| 9,613 | <i>GOLGB1</i>       | -0.564565473 |
| 9,614 | <i>SLC25A11</i>     | -0.564550841 |
| 9,615 | <i>OR2D3</i>        | -0.564425572 |
| 9,616 | <i>LLT1</i>         | -0.56440783  |
| 9,617 | <i>GMPR2</i>        | -0.564319984 |
| 9,618 | <i>UNQ5792</i>      | -0.564209678 |
| 9,619 | <i>FLJ42461</i>     | -0.564142161 |
| 9,620 | <i>DKFZP434I116</i> | -0.56409497  |
| 9,621 | <i>AD031</i>        | -0.564089578 |
| 9,622 | <i>PP35</i>         | -0.564089578 |
| 9,623 | <i>MLLT3</i>        | -0.564043796 |
| 9,624 | <i>OR52K1</i>       | -0.563929554 |
| 9,625 | <i>NPPA</i>         | -0.563743703 |
| 9,626 | <i>KIF25</i>        | -0.563278167 |

|       |                  |              |
|-------|------------------|--------------|
| 9,627 | <i>PTPRR</i>     | -0.56306723  |
| 9,628 | <i>FGA</i>       | -0.563001785 |
| 9,629 | <i>GMFB</i>      | -0.56270135  |
| 9,630 | <i>CDC7</i>      | -0.562688794 |
| 9,631 | <i>PSMB8</i>     | -0.562319108 |
| 9,632 | <i>MGC48628</i>  | -0.562302757 |
| 9,633 | <i>CREG</i>      | -0.562253944 |
| 9,634 | <i>CBWD6</i>     | -0.562253563 |
| 9,635 | <i>RG9MTD1</i>   | -0.56222301  |
| 9,636 | <i>SLC35A5</i>   | -0.562114796 |
| 9,637 | <i>MBNL3</i>     | -0.562037075 |
| 9,638 | <i>LOC285382</i> | -0.561913989 |
| 9,639 | <i>OPN1SW</i>    | -0.561718737 |
| 9,640 | <i>ZNF350</i>    | -0.561466637 |
| 9,641 | <i>OR2AG2</i>    | -0.561273178 |
| 9,642 | <i>C6ORF102</i>  | -0.561267239 |
| 9,643 | <i>MDS031</i>    | -0.56108543  |
| 9,644 | <i>MAN1C1</i>    | -0.560883111 |
| 9,645 | <i>BCL7A</i>     | -0.560832658 |
| 9,646 | <i>SEPT10</i>    | -0.560800951 |
| 9,647 | <i>LOC143678</i> | -0.560605595 |
| 9,648 | <i>ATP8A2</i>    | -0.560495045 |
| 9,649 | <i>SOX21</i>     | -0.560461694 |
| 9,650 | <i>BCAS4</i>     | -0.560376799 |
| 9,651 | <i>SIX2</i>      | -0.560053615 |
| 9,652 | <i>FLJ40869</i>  | -0.560008062 |
| 9,653 | <i>GALNT5</i>    | -0.559864545 |
| 9,654 | <i>IFNGR2</i>    | -0.559818463 |
| 9,655 | <i>SNTA1</i>     | -0.559290396 |
| 9,656 | <i>GPR135</i>    | -0.559273664 |
| 9,657 | <i>TSGA10</i>    | -0.559165417 |
| 9,658 | <i>ABCC11</i>    | -0.559102793 |
| 9,659 | <i>TOMM40</i>    | -0.558919307 |
| 9,660 | <i>CDC26</i>     | -0.558908504 |
| 9,661 | <i>ZNF219</i>    | -0.558679561 |
| 9,662 | <i>VG5Q</i>      | -0.558620638 |
| 9,663 | <i>OS-9</i>      | -0.558411664 |
| 9,664 | <i>CLDN2</i>     | -0.558318448 |
| 9,665 | <i>NAP1L4</i>    | -0.558203953 |
| 9,666 | <i>MGC34646</i>  | -0.558201491 |
| 9,667 | <i>BOP1</i>      | -0.558195936 |
| 9,668 | <i>FLJ40296</i>  | -0.55813453  |
| 9,669 | <i>BBS5</i>      | -0.557987178 |
| 9,670 | <i>FLJ11838</i>  | -0.557898244 |
| 9,671 | <i>MCM10</i>     | -0.557897284 |
| 9,672 | <i>CDY2</i>      | -0.557535273 |
| 9,673 | <i>UBE2A</i>     | -0.557530944 |

|       |           |              |
|-------|-----------|--------------|
| 9,674 | LOC390243 | -0.557221106 |
| 9,675 | EDNRB     | -0.557189318 |
| 9,676 | SLC35B1   | -0.556969702 |
| 9,677 | CUGBP2    | -0.55686265  |
| 9,678 | EFG1      | -0.556528185 |
| 9,679 | CHIC1     | -0.556504346 |
| 9,680 | PRDM1     | -0.556244019 |
| 9,681 | ELOVL1    | -0.556240068 |
| 9,682 | MAD2L2    | -0.556197083 |
| 9,683 | APCDD1    | -0.555767703 |
| 9,684 | KLRF1     | -0.555628029 |
| 9,685 | CDKN2C    | -0.555593742 |
| 9,686 | ZNF513    | -0.55557544  |
| 9,687 | PEX5L     | -0.555167735 |
| 9,688 | TD1       | -0.554786971 |
| 9,689 | MGC2477   | -0.554718073 |
| 9,690 | KREMEN2   | -0.554635657 |
| 9,691 | ASB18     | -0.554626937 |
| 9,692 | ARHGEF4   | -0.554595996 |
| 9,693 | COX11     | -0.554367961 |
| 9,694 | C2ORF3    | -0.554308395 |
| 9,695 | NARFL     | -0.554304195 |
| 9,696 | CACNA2D1  | -0.554249356 |
| 9,697 | C14ORF156 | -0.553985123 |
| 9,698 | CDH20     | -0.553932458 |
| 9,699 | TUBGCP2   | -0.553330783 |
| 9,700 | RCN3      | -0.552916222 |
| 9,701 | C11ORF15  | -0.552681666 |
| 9,702 | OSGEPL1   | -0.552656661 |
| 9,703 | CRI1      | -0.552455643 |
| 9,704 | ATP2B3    | -0.552122826 |
| 9,705 | SLC12A2   | -0.551933238 |
| 9,706 | KLHL9     | -0.551823495 |
| 9,707 | SSTK      | -0.551590197 |
| 9,708 | PCDHGA1   | -0.551462626 |
| 9,709 | KIF14     | -0.551372118 |
| 9,710 | PALM2     | -0.551141735 |
| 9,711 | FLJ23751  | -0.551109743 |
| 9,712 | LOC389432 | -0.550806061 |
| 9,713 | ADAMDEC1  | -0.550573402 |
| 9,714 | FLJ20130  | -0.55053504  |
| 9,715 | MRPS35    | -0.550501934 |
| 9,716 | ARL6IP4   | -0.550236555 |
| 9,717 | C10ORF137 | -0.550108092 |
| 9,718 | ATXN2L    | -0.549704734 |
| 9,719 | EDG2      | -0.549687468 |
| 9,720 | FLJ32356  | -0.549527162 |

|       |           |              |
|-------|-----------|--------------|
| 9,721 | SLC29A4   | -0.549404911 |
| 9,722 | LIME1     | -0.549311292 |
| 9,723 | SULT1A4   | -0.549172121 |
| 9,724 | DHX57     | -0.548979731 |
| 9,725 | A2M       | -0.548961056 |
| 9,726 | RBM11     | -0.548884105 |
| 9,727 | MGC3234   | -0.548591931 |
| 9,728 | CA10      | -0.548489525 |
| 9,729 | LOC113828 | -0.548452393 |
| 9,730 | FKSG14    | -0.548293198 |
| 9,731 | MGC17839  | -0.548124779 |
| 9,732 | HRPT2     | -0.548099755 |
| 9,733 | RASGEF1B  | -0.547816775 |
| 9,734 | DDIT4L    | -0.547810366 |
| 9,735 | DDIT4L    | -0.547810366 |
| 9,736 | PNKP      | -0.547620578 |
| 9,737 | SEPX1     | -0.547327996 |
| 9,738 | FLJ21945  | -0.547311421 |
| 9,739 | TBL3      | -0.547282075 |
| 9,740 | YWHAB     | -0.547187213 |
| 9,741 | IQSEC1    | -0.547168913 |
| 9,742 | SYNPO2    | -0.547155098 |
| 9,743 | SLC1A5    | -0.546968943 |
| 9,744 | FLJ20625  | -0.546936715 |
| 9,745 | CRYBB3    | -0.546528066 |
| 9,746 | C2ORF11   | -0.546448112 |
| 9,747 | HIST1H2BA | -0.546326501 |
| 9,748 | NOX5      | -0.545918287 |
| 9,749 | LOC283951 | -0.545854258 |
| 9,750 | CDYL2     | -0.545830802 |
| 9,751 | CENTD2    | -0.545748097 |
| 9,752 | INS       | -0.545688809 |
| 9,753 | PLEKHK1   | -0.545683709 |
| 9,754 | ALDH1B1   | -0.545601753 |
| 9,755 | HERC5     | -0.545566302 |
| 9,756 | TEKT3     | -0.545563919 |
| 9,757 | CDH7      | -0.545510715 |
| 9,758 | C13ORF10  | -0.545308141 |
| 9,759 | NOTCH2    | -0.545066891 |
| 9,760 | SFRP5     | -0.544987896 |
| 9,761 | DDX47     | -0.544641184 |
| 9,762 | SDHB      | -0.544605413 |
| 9,763 | CEMP1     | -0.544539265 |
| 9,764 | KIF17     | -0.544260324 |
| 9,765 | WBP1      | -0.544155106 |
| 9,766 | GRWD1     | -0.544010822 |
| 9,767 | FGF14     | -0.543902539 |



|       |                  |              |
|-------|------------------|--------------|
| 9,768 | <i>NCOA4</i>     | -0.543679584 |
| 9,769 | <i>ELKS</i>      | -0.543598907 |
| 9,770 | <i>MTIF2</i>     | -0.543473165 |
| 9,771 | <i>SLC8A2</i>    | -0.543429864 |
| 9,772 | <i>NR1H2</i>     | -0.543265181 |
| 9,773 | <i>COG3</i>      | -0.543206796 |
| 9,774 | <i>CLIC5</i>     | -0.543094026 |
| 9,775 | <i>TBC1D15</i>   | -0.542953117 |
| 9,776 | <i>TNNI1</i>     | -0.5427683   |
| 9,777 | <i>SEH1L</i>     | -0.542709251 |
| 9,778 | <i>CHD1</i>      | -0.542223009 |
| 9,779 | <i>ZFPL1</i>     | -0.542219785 |
| 9,780 | <i>TMEM30A</i>   | -0.542146002 |
| 9,781 | <i>CPO</i>       | -0.541922007 |
| 9,782 | <i>DFNA5</i>     | -0.54185043  |
| 9,783 | <i>CTHRC1</i>    | -0.541701879 |
| 9,784 | <i>PIWIL3</i>    | -0.541578342 |
| 9,785 | <i>HSD17B4</i>   | -0.541404598 |
| 9,786 | <i>MRPL35</i>    | -0.541385701 |
| 9,787 | <i>C21ORF29</i>  | -0.541299118 |
| 9,788 | <i>MGC35097</i>  | -0.541250568 |
| 9,789 | <i>GSPT1</i>     | -0.540893933 |
| 9,790 | <i>DPP8</i>      | -0.54044741  |
| 9,791 | <i>TGM3</i>      | -0.540273369 |
| 9,792 | <i>CHST13</i>    | -0.540251645 |
| 9,793 | <i>SCML1</i>     | -0.540204569 |
| 9,794 | <i>FGF13</i>     | -0.540163404 |
| 9,795 | <i>VANGL2</i>    | -0.540096762 |
| 9,796 | <i>KCNK18</i>    | -0.540003196 |
| 9,797 | <i>NJMU-R1</i>   | -0.539974184 |
| 9,798 | <i>PARD6A</i>    | -0.539924641 |
| 9,799 | <i>DNAH10</i>    | -0.539844201 |
| 9,800 | <i>LOC441282</i> | -0.539735794 |
| 9,801 | <i>OR52N1</i>    | -0.539665558 |
| 9,802 | <i>LOC400793</i> | -0.539620136 |
| 9,803 | <i>LRRC31</i>    | -0.539582429 |
| 9,804 | <i>D4ST1</i>     | -0.539571201 |
| 9,805 | <i>ERK8</i>      | -0.539404747 |
| 9,806 | <i>CCL13</i>     | -0.53908915  |
| 9,807 | <i>HRH3</i>      | -0.53901835  |
| 9,808 | <i>C10ORF42</i>  | -0.539017457 |
| 9,809 | <i>NPS</i>       | -0.53889501  |
| 9,810 | <i>RASGRP4</i>   | -0.538865539 |
| 9,811 | <i>H17</i>       | -0.538811979 |
| 9,812 | <i>AQP2</i>      | -0.538803678 |
| 9,813 | <i>LPO</i>       | -0.538745469 |
| 9,814 | <i>ZNF133</i>    | -0.538632325 |

|       |                  |              |
|-------|------------------|--------------|
| 9,815 | <i>ARTS-1</i>    | -0.538414588 |
| 9,816 | <i>MGC34821</i>  | -0.538222575 |
| 9,817 | <i>ZNF185</i>    | -0.538040401 |
| 9,818 | <i>MGC26989</i>  | -0.538033301 |
| 9,819 | <i>SGK</i>       | -0.538021698 |
| 9,820 | <i>GUCA1A</i>    | -0.537963685 |
| 9,821 | <i>APOL2</i>     | -0.537933959 |
| 9,822 | <i>LOC90693</i>  | -0.537901591 |
| 9,823 | <i>KIAA0140</i>  | -0.537620257 |
| 9,824 | <i>MRPL15</i>    | -0.53739409  |
| 9,825 | <i>C1ORF16</i>   | -0.53723122  |
| 9,826 | <i>CDX2</i>      | -0.537127074 |
| 9,827 | <i>PGPL</i>      | -0.536953713 |
| 9,828 | <i>C1ORF40</i>   | -0.536932587 |
| 9,829 | <i>ZNF259</i>    | -0.53683787  |
| 9,830 | <i>HCCR1</i>     | -0.536490807 |
| 9,831 | <i>OLFM2</i>     | -0.53623801  |
| 9,832 | <i>SLC5A6</i>    | -0.535949586 |
| 9,833 | <i>COL4A4</i>    | -0.535942981 |
| 9,834 | <i>ITGA11</i>    | -0.535923428 |
| 9,835 | <i>MGC45428</i>  | -0.535920722 |
| 9,836 | <i>LIMS3</i>     | -0.535555319 |
| 9,837 | <i>KIAA0376</i>  | -0.535447372 |
| 9,838 | <i>PSG1</i>      | -0.535377159 |
| 9,839 | <i>RAB26</i>     | -0.535376719 |
| 9,840 | <i>C10orf96</i>  | -0.535300554 |
| 9,841 | <i>SLC41A3</i>   | -0.535298211 |
| 9,842 | <i>C14ORF155</i> | -0.534979661 |
| 9,843 | <i>FLJ20605</i>  | -0.534975967 |
| 9,844 | <i>MRPL42</i>    | -0.534648001 |
| 9,845 | <i>INS-IGF2</i>  | -0.534443286 |
| 9,846 | <i>LOC401067</i> | -0.534229764 |
| 9,847 | <i>FLJ14466</i>  | -0.533849048 |
| 9,848 | <i>KCTD9</i>     | -0.53374424  |
| 9,849 | <i>SLC25A31</i>  | -0.533592872 |
| 9,850 | <i>SNX11</i>     | -0.533535044 |
| 9,851 | <i>MGC12981</i>  | -0.533237527 |
| 9,852 | <i>DEFA3</i>     | -0.533151623 |
| 9,853 | <i>FLJ22056</i>  | -0.533095714 |
| 9,854 | <i>OSGEP</i>     | -0.532680049 |
| 9,855 | <i>MGC16943</i>  | -0.532033653 |
| 9,856 | <i>ASRGL1</i>    | -0.532017309 |
| 9,857 | <i>NAV1</i>      | -0.53180947  |
| 9,858 | <i>LOC646754</i> | -0.531794034 |
| 9,859 | <i>MLLT10</i>    | -0.531687256 |
| 9,860 | <i>FOXP4</i>     | -0.531655034 |
| 9,861 | <i>SIX1</i>      | -0.531266748 |

|       |                      |              |
|-------|----------------------|--------------|
| 9,862 | <i>ALDH1L1</i>       | -0.530838041 |
| 9,863 | <i>SCN7A</i>         | -0.530653818 |
| 9,864 | <i>SPG7</i>          | -0.530049669 |
| 9,865 | <i>C16ORF7</i>       | -0.529864109 |
| 9,866 | <i>ADCY5</i>         | -0.529815599 |
| 9,867 | <i>GPC1</i>          | -0.529571348 |
| 9,868 | <i>TH1L</i>          | -0.529519087 |
| 9,869 | <i>FLJ32949</i>      | -0.529200021 |
| 9,870 | <i>PRSS2</i>         | -0.529166003 |
| 9,871 | <i>AK1</i>           | -0.529143981 |
| 9,872 | <i>EPS15</i>         | -0.529115127 |
| 9,873 | <i>SNRPA</i>         | -0.529094413 |
| 9,874 | <i>ANXA3</i>         | -0.528742489 |
| 9,875 | <i>USP5</i>          | -0.528711283 |
| 9,876 | <i>DEFB104</i>       | -0.528595738 |
| 9,877 | <i>KIAA0100</i>      | -0.528578627 |
| 9,878 | <i>BRIP1</i>         | -0.528412402 |
| 9,879 | <i>EID3</i>          | -0.528390139 |
| 9,880 | <i>BF</i>            | -0.527707492 |
| 9,881 | <i>ATP5L</i>         | -0.527500208 |
| 9,882 | <i>ECEL1</i>         | -0.527372896 |
| 9,883 | <i>PRAF2</i>         | -0.527223075 |
| 9,884 | <i>HECTD3</i>        | -0.526337413 |
| 9,885 | <i>MYO48</i>         | -0.526060375 |
| 9,886 | <i>CD9</i>           | -0.526005387 |
| 9,887 | <i>DKFZP434A1319</i> | -0.52600136  |
| 9,888 | <i>INSL5</i>         | -0.525872621 |
| 9,889 | <i>DLGAP3</i>        | -0.525598734 |
| 9,890 | <i>PCGF1</i>         | -0.525447634 |
| 9,891 | <i>SLC35B3</i>       | -0.525405214 |
| 9,892 | <i>SV2B</i>          | -0.525312761 |
| 9,893 | <i>KIAA1958</i>      | -0.525191941 |
| 9,894 | <i>CARD10</i>        | -0.5251466   |
| 9,895 | <i>PAQR9</i>         | -0.525132627 |
| 9,896 | <i>LOC442578</i>     | -0.525124841 |
| 9,897 | <i>ODZ3</i>          | -0.52511995  |
| 9,898 | <i>MMD</i>           | -0.524995418 |
| 9,899 | <i>RNF5</i>          | -0.524810148 |
| 9,900 | <i>DDX43</i>         | -0.524774503 |
| 9,901 | <i>DCAL1</i>         | -0.524685835 |
| 9,902 | <i>ECG2</i>          | -0.524677645 |
| 9,903 | <i>SLITRK3</i>       | -0.524593414 |
| 9,904 | <i>DKFZP434H2226</i> | -0.52450879  |
| 9,905 | <i>GIP</i>           | -0.524336135 |
| 9,906 | <i>NCSTN</i>         | -0.524231538 |
| 9,907 | <i>KREMEN1</i>       | -0.524092926 |
| 9,908 | <i>MPEG1</i>         | -0.524038975 |

|       |                      |              |
|-------|----------------------|--------------|
| 9,909 | <i>MPEG1</i>         | -0.524038975 |
| 9,910 | <i>AQP9</i>          | -0.523995586 |
| 9,911 | <i>TSPAN6</i>        | -0.522979772 |
| 9,912 | <i>CLEC10A</i>       | -0.522913399 |
| 9,913 | <i>SERTAD3</i>       | -0.522520803 |
| 9,914 | <i>FLJ32642</i>      | -0.522171655 |
| 9,915 | <i>TMEM18</i>        | -0.52211809  |
| 9,916 | <i>SNURF</i>         | -0.522067345 |
| 9,917 | <i>DDX10</i>         | -0.521959354 |
| 9,918 | <i>HSPC182</i>       | -0.521954455 |
| 9,919 | <i>KIAA1729</i>      | -0.52178557  |
| 9,920 | <i>RAB8B</i>         | -0.521665057 |
| 9,921 | <i>LOC146909</i>     | -0.521572511 |
| 9,922 | <i>POP7</i>          | -0.521460392 |
| 9,923 | <i>ARHGEF16</i>      | -0.521063665 |
| 9,924 | <i>CPR8</i>          | -0.520950059 |
| 9,925 | <i>CYP4V2</i>        | -0.520878077 |
| 9,926 | <i>AP1G2</i>         | -0.52087622  |
| 9,927 | <i>LKAP</i>          | -0.520808203 |
| 9,928 | <i>CCNH</i>          | -0.520741395 |
| 9,929 | <i>DKFZP566K0524</i> | -0.520469421 |
| 9,930 | <i>SIN3A</i>         | -0.520455642 |
| 9,931 | <i>PGF</i>           | -0.520424651 |
| 9,932 | <i>FARP2</i>         | -0.520141973 |
| 9,933 | <i>CHN2</i>          | -0.519664918 |
| 9,934 | <i>FLJ10581</i>      | -0.519663688 |
| 9,935 | <i>RNF41</i>         | -0.519648657 |
| 9,936 | <i>ZNF192</i>        | -0.51962617  |
| 9,937 | <i>LOC116238</i>     | -0.5196135   |
| 9,938 | <i>ADD3</i>          | -0.519538009 |
| 9,939 | <i>LOC131368</i>     | -0.5195142   |
| 9,940 | <i>SNX4</i>          | -0.519491823 |
| 9,941 | <i>IFT122</i>        | -0.519289627 |
| 9,942 | <i>BOK</i>           | -0.518992072 |
| 9,943 | <i>HNRPH2</i>        | -0.518959771 |
| 9,944 | <i>MGAT5</i>         | -0.518928484 |
| 9,945 | <i>C9orf106</i>      | -0.51823037  |
| 9,946 | <i>FMNL2</i>         | -0.518174018 |
| 9,947 | <i>C18ORF25</i>      | -0.517855645 |
| 9,948 | <i>EIF1AX</i>        | -0.51784152  |
| 9,949 | <i>FLJ10706</i>      | -0.51762383  |
| 9,950 | <i>FREM1</i>         | -0.517602577 |
| 9,951 | <i>TRPC5</i>         | -0.517435437 |
| 9,952 | <i>CD300LD</i>       | -0.517406615 |
| 9,953 | <i>FLJ10847</i>      | -0.517262751 |
| 9,954 | <i>OR2G2</i>         | -0.517218412 |
| 9,955 | <i>OR6C65</i>        | -0.517086597 |

|        |                  |              |
|--------|------------------|--------------|
| 9,956  | <i>KRTAP4-14</i> | -0.516712531 |
| 9,957  | <i>PLAC8</i>     | -0.516688213 |
| 9,958  | <i>DNMBP</i>     | -0.516667069 |
| 9,959  | <i>ADAMTS4</i>   | -0.516537627 |
| 9,960  | <i>GBE1</i>      | -0.516318806 |
| 9,961  | <i>YTHDF1</i>    | -0.516165612 |
| 9,962  | <i>HAMP</i>      | -0.516112958 |
| 9,963  | <i>TGM5</i>      | -0.515942804 |
| 9,964  | <i>NDUFAB1</i>   | -0.51578925  |
| 9,965  | <i>TEF</i>       | -0.515618304 |
| 9,966  | <i>QTRTD1</i>    | -0.515349846 |
| 9,967  | <i>MGC4809</i>   | -0.515254069 |
| 9,968  | <i>USP9Y</i>     | -0.514999782 |
| 9,969  | <i>COL21A1</i>   | -0.514822475 |
| 9,970  | <i>TPK1</i>      | -0.513858617 |
| 9,971  | <i>PAI-RBP1</i>  | -0.513395643 |
| 9,972  | <i>COMMD2</i>    | -0.513261795 |
| 9,973  | <i>TMEFF1</i>    | -0.513226942 |
| 9,974  | <i>PPP1R3D</i>   | -0.513092794 |
| 9,975  | <i>ZNF521</i>    | -0.512983498 |
| 9,976  | <i>DOK4</i>      | -0.512925602 |
| 9,977  | <i>PRO0971</i>   | -0.512767023 |
| 9,978  | <i>C9orf128</i>  | -0.512457918 |
| 9,979  | <i>TEAD3</i>     | -0.5123809   |
| 9,980  | <i>MRPL27</i>    | -0.512311279 |
| 9,981  | <i>ZNF609</i>    | -0.512240094 |
| 9,982  | <i>FGF7</i>      | -0.511846153 |
| 9,983  | <i>GPR12</i>     | -0.510818538 |
| 9,984  | <i>FBLN5</i>     | -0.510752504 |
| 9,985  | <i>FLJ21174</i>  | -0.510483448 |
| 9,986  | <i>CYP2S1</i>    | -0.510139565 |
| 9,987  | <i>KLK11</i>     | -0.509924283 |
| 9,988  | <i>PDZK6</i>     | -0.509812816 |
| 9,989  | <i>SLC12A8</i>   | -0.509646811 |
| 9,990  | <i>RHOC</i>      | -0.509595552 |
| 9,991  | <i>SPANX-N5</i>  | -0.509349234 |
| 9,992  | <i>KIAA1033</i>  | -0.509296686 |
| 9,993  | <i>KRTAP9-2</i>  | -0.509284905 |
| 9,994  | <i>QIL1</i>      | -0.509235614 |
| 9,995  | <i>KIAA0738</i>  | -0.509059312 |
| 9,996  | <i>FBP2</i>      | -0.50897193  |
| 9,997  | <i>SMYD2</i>     | -0.508970207 |
| 9,998  | <i>FAM13C1</i>   | -0.508954475 |
| 9,999  | <i>TEAD4</i>     | -0.508947769 |
| 10,000 | <i>NALP9</i>     | -0.508765077 |
| 10,001 | <i>COMMD10</i>   | -0.508664987 |
| 10,002 | <i>ELK4</i>      | -0.508606411 |

|        |                  |              |
|--------|------------------|--------------|
| 10,003 | <i>MLL3</i>      | -0.50852407  |
| 10,004 | <i>STATH</i>     | -0.508421263 |
| 10,005 | <i>ZNF42</i>     | -0.508335038 |
| 10,006 | <i>SYNPO</i>     | -0.508311284 |
| 10,007 | <i>CD79B</i>     | -0.507862281 |
| 10,008 | <i>TPCN2</i>     | -0.507795641 |
| 10,009 | <i>EPC2</i>      | -0.507597306 |
| 10,010 | <i>FLJ20097</i>  | -0.507501226 |
| 10,011 | <i>IFITM2</i>    | -0.507443182 |
| 10,012 | <i>MYEF2</i>     | -0.507211228 |
| 10,013 | <i>SCAP1</i>     | -0.507133045 |
| 10,014 | <i>IL6</i>       | -0.506811947 |
| 10,015 | <i>KIAA0672</i>  | -0.50663533  |
| 10,016 | <i>MMP14</i>     | -0.50656459  |
| 10,017 | <i>FGR</i>       | -0.50649159  |
| 10,018 | <i>METTL5</i>    | -0.506329387 |
| 10,019 | <i>C6ORF47</i>   | -0.506234773 |
| 10,020 | <i>GPX5</i>      | -0.506020605 |
| 10,021 | <i>TMC4</i>      | -0.505864434 |
| 10,022 | <i>HOXC13</i>    | -0.505628056 |
| 10,023 | <i>MTHFD2L</i>   | -0.505454858 |
| 10,024 | <i>SIPA1L3</i>   | -0.505322946 |
| 10,025 | <i>LOC129607</i> | -0.505040083 |
| 10,026 | <i>CITED1</i>    | -0.504896149 |
| 10,027 | <i>NFKB2</i>     | -0.504439547 |
| 10,028 | <i>RET</i>       | -0.504382718 |
| 10,029 | <i>MGC33948</i>  | -0.504361628 |
| 10,030 | <i>RAD52B</i>    | -0.504356838 |
| 10,031 | <i>MGC45873</i>  | -0.503985096 |
| 10,032 | <i>GDAP1</i>     | -0.503966817 |
| 10,033 | <i>ZNF216</i>    | -0.503743995 |
| 10,034 | <i>NCR1</i>      | -0.503671503 |
| 10,035 | <i>FKRP</i>      | -0.503479086 |
| 10,036 | <i>ENTPD7</i>    | -0.503455109 |
| 10,037 | <i>C20ORF142</i> | -0.50344343  |
| 10,038 | <i>SDK2</i>      | -0.50344343  |
| 10,039 | <i>NDUFB11</i>   | -0.503276793 |
| 10,040 | <i>PDIK1L</i>    | -0.503271934 |
| 10,041 | <i>KA35</i>      | -0.503188928 |
| 10,042 | <i>ZD52F10</i>   | -0.503131919 |
| 10,043 | <i>LUC7A</i>     | -0.502946639 |
| 10,044 | <i>CX3CL1</i>    | -0.502406184 |
| 10,045 | <i>PLUNC</i>     | -0.502367631 |
| 10,046 | <i>GBX2</i>      | -0.502341773 |
| 10,047 | <i>CHFR</i>      | -0.502008941 |
| 10,048 | <i>PRSS2</i>     | -0.501565376 |
| 10,049 | <i>PCDHGA4</i>   | -0.501329397 |

|        |                 |              |
|--------|-----------------|--------------|
| 10,050 | <i>PMS2L5</i>   | -0.501266816 |
| 10,051 | <i>GKAP1</i>    | -0.501133605 |
| 10,052 | <i>SLC40A1</i>  | -0.501013764 |
| 10,053 | <i>HTR1E</i>    | -0.500890037 |
| 10,054 | <i>ENTPD2</i>   | -0.500741114 |
| 10,055 | <i>ITGA2</i>    | -0.500710278 |
| 10,056 | <i>MS4A13</i>   | -0.50062061  |
| 10,057 | <i>ZNF167</i>   | -0.500403431 |
| 10,058 | <i>FLJ12448</i> | -0.500367184 |
| 10,059 | <i>COL16A1</i>  | -0.500338385 |
| 10,060 | <i>UCN3</i>     | -0.500303969 |
| 10,061 | <i>COX7A2L</i>  | -0.500144183 |
| 10,062 | <i>ELF5</i>     | -0.49990235  |
| 10,063 | <i>EPHA1</i>    | -0.499684275 |
| 10,064 | <i>ATG4D</i>    | -0.49959119  |
| 10,065 | <i>ITGB7</i>    | -0.499515539 |
| 10,066 | <i>IRF5</i>     | -0.499186752 |
| 10,067 | <i>CD200R2</i>  | -0.499169706 |
| 10,068 | <i>ADAMTS3</i>  | -0.499147792 |
| 10,069 | <i>C9ORF43</i>  | -0.499046413 |
| 10,070 | <i>MOG</i>      | -0.498996409 |
| 10,071 | <i>SRPK1</i>    | -0.498467335 |
| 10,072 | <i>SLC10A1</i>  | -0.498437409 |
| 10,073 | <i>M-RIP</i>    | -0.498365563 |
| 10,074 | <i>ADAM23</i>   | -0.498260997 |
| 10,075 | <i>RING1</i>    | -0.498249658 |
| 10,076 | <i>CYP4F3</i>   | -0.497675422 |
| 10,077 | <i>SNX7</i>     | -0.497148168 |
| 10,078 | <i>FBXO21</i>   | -0.496947069 |
| 10,079 | <i>AARS</i>     | -0.496832571 |
| 10,080 | <i>PLS1</i>     | -0.496726386 |
| 10,081 | <i>BRRN1</i>    | -0.496516772 |
| 10,082 | <i>CCBP2</i>    | -0.496477769 |
| 10,083 | <i>MGC5139</i>  | -0.496344424 |
| 10,084 | <i>ARNTL2</i>   | -0.49626804  |
| 10,085 | <i>CCL3</i>     | -0.496152381 |
| 10,086 | <i>SIM2</i>     | -0.49611175  |
| 10,087 | <i>OR13D1</i>   | -0.49593173  |
| 10,088 | <i>SQLE</i>     | -0.495818414 |
| 10,089 | <i>ADAMTS19</i> | -0.495712218 |
| 10,090 | <i>XPA</i>      | -0.495627308 |
| 10,091 | <i>CGI-62</i>   | -0.495588578 |
| 10,092 | <i>TRIM42</i>   | -0.495485803 |
| 10,093 | <i>TBPL2</i>    | -0.495128356 |
| 10,094 | <i>RPL10A</i>   | -0.495057865 |
| 10,095 | <i>TMPRSS12</i> | -0.494864523 |
| 10,096 | <i>RAB23</i>    | -0.494598902 |

|        |                  |              |
|--------|------------------|--------------|
| 10,097 | <i>INTERSEX</i>  | -0.494480612 |
| 10,098 | <i>PRPS1L1</i>   | -0.494156413 |
| 10,099 | <i>OR7G1</i>     | -0.493970557 |
| 10,100 | <i>P2RX5</i>     | -0.493940236 |
| 10,101 | <i>GPR10</i>     | -0.493918996 |
| 10,102 | <i>AZGP1</i>     | -0.493723011 |
| 10,103 | <i>CYB561</i>    | -0.493381174 |
| 10,104 | <i>DISP1</i>     | -0.493323133 |
| 10,105 | <i>DISP1</i>     | -0.493323133 |
| 10,106 | <i>FPRL2</i>     | -0.493190384 |
| 10,107 | <i>DNAJB7</i>    | -0.493168245 |
| 10,108 | <i>DGAT2L4</i>   | -0.492601529 |
| 10,109 | <i>HSYN</i>      | -0.492569625 |
| 10,110 | <i>UPF3A</i>     | -0.49240964  |
| 10,111 | <i>POLR3B</i>    | -0.492175209 |
| 10,112 | <i>F10</i>       | -0.492119125 |
| 10,113 | <i>SLC45A3</i>   | -0.49197693  |
| 10,114 | <i>SLIT2</i>     | -0.491948701 |
| 10,115 | <i>SEMA4G</i>    | -0.491937574 |
| 10,116 | <i>13CDNA73</i>  | -0.491918939 |
| 10,117 | <i>D15WSU75E</i> | -0.491907387 |
| 10,118 | <i>KIAA0092</i>  | -0.49180217  |
| 10,119 | <i>PDXK</i>      | -0.491720468 |
| 10,120 | <i>LOC114926</i> | -0.491671997 |
| 10,121 | <i>CCRK</i>      | -0.491575588 |
| 10,122 | <i>CAPN7</i>     | -0.491185218 |
| 10,123 | <i>ADAMTS16</i>  | -0.490592969 |
| 10,124 | <i>GRIK2</i>     | -0.490452367 |
| 10,125 | <i>JARID1C</i>   | -0.490261759 |
| 10,126 | <i>MLL5</i>      | -0.490244467 |
| 10,127 | <i>MGC16824</i>  | -0.49003714  |
| 10,128 | <i>OR9G1</i>     | -0.489760018 |
| 10,129 | <i>PTP4A2</i>    | -0.489131568 |
| 10,130 | <i>GLTP</i>      | -0.489067802 |
| 10,131 | <i>XCL2</i>      | -0.489030628 |
| 10,132 | <i>CTNNA2</i>    | -0.488596688 |
| 10,133 | <i>CTGLF1</i>    | -0.488362752 |
| 10,134 | <i>PSK-1</i>     | -0.486803116 |
| 10,135 | <i>MSH5</i>      | -0.486756967 |
| 10,136 | <i>RAD51L3</i>   | -0.486525235 |
| 10,137 | <i>ESR1</i>      | -0.486441333 |
| 10,138 | <i>TNNT2</i>     | -0.486427613 |
| 10,139 | <i>TSC</i>       | -0.48616019  |
| 10,140 | <i>PADI1</i>     | -0.485734714 |
| 10,141 | <i>DSG4</i>      | -0.485577399 |
| 10,142 | <i>DSG4</i>      | -0.485577399 |
| 10,143 | <i>SP4</i>       | -0.485362449 |



|        |                  |              |
|--------|------------------|--------------|
| 10,144 | <i>KIAA1199</i>  | -0.485137228 |
| 10,145 | <i>LOC339451</i> | -0.484690123 |
| 10,146 | <i>KCNJ9</i>     | -0.484658959 |
| 10,147 | <i>MTP</i>       | -0.484628282 |
| 10,148 | <i>TBC1D3</i>    | -0.484562644 |
| 10,149 | <i>UHRF2</i>     | -0.484211089 |
| 10,150 | <i>HORMAD1</i>   | -0.484189374 |
| 10,151 | <i>LYPLA3</i>    | -0.484143115 |
| 10,152 | <i>PRRG3</i>     | -0.483914908 |
| 10,153 | <i>ZDHHC1</i>    | -0.483809727 |
| 10,154 | <i>SLC2A10</i>   | -0.483615418 |
| 10,155 | <i>FLJ45557</i>  | -0.483483921 |
| 10,156 | <i>FLJ22555</i>  | -0.48331775  |
| 10,157 | <i>SOX10</i>     | -0.483067776 |
| 10,158 | <i>RNF111</i>    | -0.483057324 |
| 10,159 | <i>FLJ20245</i>  | -0.482893381 |
| 10,160 | <i>FBXO30</i>    | -0.482610455 |
| 10,161 | <i>BAGE3</i>     | -0.482584131 |
| 10,162 | <i>LRP6</i>      | -0.482410223 |
| 10,163 | <i>SRY</i>       | -0.482279869 |
| 10,164 | <i>RPESP</i>     | -0.482230113 |
| 10,165 | <i>FLJ21075</i>  | -0.48210054  |
| 10,166 | <i>SNCA</i>      | -0.481741207 |
| 10,167 | <i>IL1RAP</i>    | -0.481536757 |
| 10,168 | <i>DSCAM</i>     | -0.481489558 |
| 10,169 | <i>RNF14</i>     | -0.48147747  |
| 10,170 | <i>HOXC8</i>     | -0.481317795 |
| 10,171 | <i>OR5AC2</i>    | -0.481096907 |
| 10,172 | <i>FLJ13910</i>  | -0.480992005 |
| 10,173 | <i>LGALS12</i>   | -0.48081505  |
| 10,174 | <i>LRRC43</i>    | -0.480790065 |
| 10,175 | <i>STMN4</i>     | -0.480705649 |
| 10,176 | <i>ARHN</i>      | -0.480647569 |
| 10,177 | <i>LOC164153</i> | -0.480623151 |
| 10,178 | <i>ADAMTSL1</i>  | -0.480622553 |
| 10,179 | <i>PLA2G2F</i>   | -0.48059768  |
| 10,180 | <i>LOXL3</i>     | -0.480578971 |
| 10,181 | <i>FLJ12800</i>  | -0.480329155 |
| 10,182 | <i>KIAA0323</i>  | -0.480230671 |
| 10,183 | <i>AF15Q14</i>   | -0.479905916 |
| 10,184 | <i>LOC441150</i> | -0.479736673 |
| 10,185 | <i>AK7</i>       | -0.47961605  |
| 10,186 | <i>MAK</i>       | -0.479286825 |
| 10,187 | <i>DERL3</i>     | -0.479251205 |
| 10,188 | <i>IL1B</i>      | -0.479244915 |
| 10,189 | <i>C21ORF59</i>  | -0.479193743 |
| 10,190 | <i>SP2</i>       | -0.479097606 |

|        |                  |              |
|--------|------------------|--------------|
| 10,191 | <i>SPTA1</i>     | -0.479008217 |
| 10,192 | <i>MGC2749</i>   | -0.478905211 |
| 10,193 | <i>BACE2</i>     | -0.47876955  |
| 10,194 | <i>PCGF2</i>     | -0.478585713 |
| 10,195 | <i>DRIM</i>      | -0.478016638 |
| 10,196 | <i>TRIM32</i>    | -0.478007362 |
| 10,197 | <i>BRODL</i>     | -0.477915779 |
| 10,198 | <i>MGC10084</i>  | -0.47771469  |
| 10,199 | <i>DDX18</i>     | -0.477714407 |
| 10,200 | <i>LOC374969</i> | -0.477603838 |
| 10,201 | <i>PFN2</i>      | -0.477466193 |
| 10,202 | <i>SLC35E4</i>   | -0.477448947 |
| 10,203 | <i>NPHP3</i>     | -0.477368094 |
| 10,204 | <i>ACTA1</i>     | -0.477341886 |
| 10,205 | <i>C6ORF211</i>  | -0.477339681 |
| 10,206 | <i>COL10A1</i>   | -0.477260975 |
| 10,207 | <i>ENO2</i>      | -0.477235571 |
| 10,208 | <i>EFHC1</i>     | -0.477021708 |
| 10,209 | <i>DEFB105B</i>  | -0.476965582 |
| 10,210 | <i>MGC1203</i>   | -0.476627808 |
| 10,211 | <i>KLF2</i>      | -0.476563333 |
| 10,212 | <i>DHX40</i>     | -0.476250044 |
| 10,213 | <i>NDUFB4</i>    | -0.475955152 |
| 10,214 | <i>KRTHB5</i>    | -0.475841943 |
| 10,215 | <i>TLL1</i>      | -0.475840124 |
| 10,216 | <i>FLJ40411</i>  | -0.4757246   |
| 10,217 | <i>PRCC</i>      | -0.475707652 |
| 10,218 | <i>EPHA3</i>     | -0.475676716 |
| 10,219 | <i>IGSF11</i>    | -0.475027693 |
| 10,220 | <i>BVES</i>      | -0.475016825 |
| 10,221 | <i>MGC40047</i>  | -0.474735799 |
| 10,222 | <i>SMAD6</i>     | -0.474605092 |
| 10,223 | <i>IL11RA</i>    | -0.474532316 |
| 10,224 | <i>SPTAN1</i>    | -0.474263613 |
| 10,225 | <i>NAPE-PLD</i>  | -0.474243761 |
| 10,226 | <i>SYT14L</i>    | -0.474208693 |
| 10,227 | <i>APOC2</i>     | -0.473867323 |
| 10,228 | <i>GPR35</i>     | -0.473813436 |
| 10,229 | <i>OR8J3</i>     | -0.473627011 |
| 10,230 | <i>GRIP1</i>     | -0.473372817 |
| 10,231 | <i>PPP3CB</i>    | -0.472911661 |
| 10,232 | <i>SLC12A6</i>   | -0.472793289 |
| 10,233 | <i>GGN</i>       | -0.472755081 |
| 10,234 | <i>BCKDHA</i>    | -0.472703396 |
| 10,235 | <i>AK3L1</i>     | -0.472571522 |
| 10,236 | <i>C10ORF79</i>  | -0.472553066 |
| 10,237 | <i>PEX10</i>     | -0.472250673 |

|        |                  |              |
|--------|------------------|--------------|
| 10,238 | <i>PRKAR2B</i>   | -0.471920674 |
| 10,239 | <i>ADPRHL2</i>   | -0.471904712 |
| 10,240 | <i>ADAMTS7</i>   | -0.471829837 |
| 10,241 | <i>SPCS2</i>     | -0.471620366 |
| 10,242 | <i>CXorf40B</i>  | -0.471391766 |
| 10,243 | <i>TBC1D7</i>    | -0.471030978 |
| 10,244 | <i>ICA1</i>      | -0.471013578 |
| 10,245 | <i>SPPL2A</i>    | -0.47039729  |
| 10,246 | <i>FLJ11267</i>  | -0.470296382 |
| 10,247 | <i>GOLGA1</i>    | -0.470282083 |
| 10,248 | <i>ZBTB3</i>     | -0.470001478 |
| 10,249 | <i>HTR2A</i>     | -0.470000862 |
| 10,250 | <i>ZNHIT1</i>    | -0.469756991 |
| 10,251 | <i>WNT9A</i>     | -0.469737265 |
| 10,252 | <i>GPR23</i>     | -0.469709036 |
| 10,253 | <i>HOXD10</i>    | -0.469625953 |
| 10,254 | <i>LOC143941</i> | -0.469425391 |
| 10,255 | <i>COL4A6</i>    | -0.469413888 |
| 10,256 | <i>RPP14</i>     | -0.469048848 |
| 10,257 | <i>FLJ20449</i>  | -0.468969536 |
| 10,258 | <i>FLJ37118</i>  | -0.468803202 |
| 10,259 | <i>DAZ3</i>      | -0.468786149 |
| 10,260 | <i>FGG</i>       | -0.468694342 |
| 10,261 | <i>PTK2</i>      | -0.46863778  |
| 10,262 | <i>TNFRSF1B</i>  | -0.468540806 |
| 10,263 | <i>FLJ00012</i>  | -0.468179018 |
| 10,264 | <i>FLJ40125</i>  | -0.467751763 |
| 10,265 | <i>STAF42</i>    | -0.46764419  |
| 10,266 | <i>WDR36</i>     | -0.467554354 |
| 10,267 | <i>PRKACA</i>    | -0.467540518 |
| 10,268 | <i>VDAC3</i>     | -0.46724081  |
| 10,269 | <i>GLE1L</i>     | -0.467216591 |
| 10,270 | <i>MGC13204</i>  | -0.467184643 |
| 10,271 | <i>POU6F2</i>    | -0.467100394 |
| 10,272 | <i>SH3BP2</i>    | -0.467040732 |
| 10,273 | <i>JARID1B</i>   | -0.466480202 |
| 10,274 | <i>KIFC1</i>     | -0.466278973 |
| 10,275 | <i>SFTPB</i>     | -0.466029684 |
| 10,276 | <i>AKR1D1</i>    | -0.465990108 |
| 10,277 | <i>C19ORF12</i>  | -0.46583579  |
| 10,278 | <i>TSGA2</i>     | -0.465812422 |
| 10,279 | <i>TSGA2</i>     | -0.465812422 |
| 10,280 | <i>F7</i>        | -0.465698744 |
| 10,281 | <i>SCAMP5</i>    | -0.465689572 |
| 10,282 | <i>PRIM2A</i>    | -0.465452837 |
| 10,283 | <i>FLJ32978</i>  | -0.465424419 |
| 10,284 | <i>SLC25A3</i>   | -0.465340226 |

|        |                      |              |
|--------|----------------------|--------------|
| 10,285 | <i>GPR175</i>        | -0.465325228 |
| 10,286 | <i>FLJ42925</i>      | -0.465132401 |
| 10,287 | <i>FLJ35784</i>      | -0.465070737 |
| 10,288 | <i>MRPS30</i>        | -0.464977778 |
| 10,289 | <i>C6ORF65</i>       | -0.464963    |
| 10,290 | <i>COL11A1</i>       | -0.464910106 |
| 10,291 | <i>TREM1</i>         | -0.464657302 |
| 10,292 | <i>ZNF304</i>        | -0.464657054 |
| 10,293 | <i>LOC400720</i>     | -0.464571428 |
| 10,294 | <i>LRRTM2</i>        | -0.464561209 |
| 10,295 | <i>ADORA1</i>        | -0.464499985 |
| 10,296 | <i>DKFZP564K142</i>  | -0.46444178  |
| 10,297 | <i>FCN2</i>          | -0.464155339 |
| 10,298 | <i>RBP4</i>          | -0.464152658 |
| 10,299 | <i>KCNU1</i>         | -0.464045581 |
| 10,300 | <i>CHST3</i>         | -0.463777805 |
| 10,301 | <i>ZNF287</i>        | -0.463639176 |
| 10,302 | <i>PPFIA1</i>        | -0.463543746 |
| 10,303 | <i>TAGLN2</i>        | -0.463542121 |
| 10,304 | <i>LMO1</i>          | -0.463437408 |
| 10,305 | <i>OR9A2</i>         | -0.463321914 |
| 10,306 | <i>CT45-4</i>        | -0.463065596 |
| 10,307 | <i>CLCN7</i>         | -0.462998734 |
| 10,308 | <i>LOC653404</i>     | -0.46240715  |
| 10,309 | <i>PMP2</i>          | -0.462233473 |
| 10,310 | <i>IL1RL1</i>        | -0.462216821 |
| 10,311 | <i>FBXO23</i>        | -0.4621386   |
| 10,312 | <i>KIAA0676</i>      | -0.461970661 |
| 10,313 | <i>MGC35366</i>      | -0.461918242 |
| 10,314 | <i>TBRG4</i>         | -0.461841123 |
| 10,315 | <i>SV2A</i>          | -0.461470788 |
| 10,316 | <i>PDCD4</i>         | -0.461267261 |
| 10,317 | <i>CDKAL1</i>        | -0.461263188 |
| 10,318 | <i>IFNE1</i>         | -0.460695633 |
| 10,319 | <i>DKFZP566J2046</i> | -0.460682877 |
| 10,320 | <i>LPIN2</i>         | -0.460682791 |
| 10,321 | <i>LRP2BP</i>        | -0.460392321 |
| 10,322 | <i>PTPN22</i>        | -0.460063851 |
| 10,323 | <i>NSE1</i>          | -0.460035304 |
| 10,324 | <i>NUP98</i>         | -0.45999534  |
| 10,325 | <i>ZNF625</i>        | -0.45998306  |
| 10,326 | <i>C2ORF15</i>       | -0.459764585 |
| 10,327 | <i>OSTM1</i>         | -0.459651923 |
| 10,328 | <i>KIAA1904</i>      | -0.459577378 |
| 10,329 | <i>LOC55565</i>      | -0.459504596 |
| 10,330 | <i>BAGE4</i>         | -0.459465056 |
| 10,331 | <i>SEPT3</i>         | -0.459089752 |

|        |              |              |
|--------|--------------|--------------|
| 10,332 | KIAA0625     | -0.459059274 |
| 10,333 | FLJ10287     | -0.459040647 |
| 10,334 | SLC35E3      | -0.458974589 |
| 10,335 | THAP4        | -0.458705067 |
| 10,336 | DET1         | -0.458499056 |
| 10,337 | KIAA0406     | -0.458174653 |
| 10,338 | CPT2         | -0.458124273 |
| 10,339 | SPIC         | -0.458121535 |
| 10,340 | OTUD4        | -0.458090375 |
| 10,341 | CHRNA1       | -0.458063493 |
| 10,342 | CAD          | -0.458058516 |
| 10,343 | GPR143       | -0.457966732 |
| 10,344 | LHFP         | -0.457963186 |
| 10,345 | ARNT2        | -0.457945187 |
| 10,346 | TRIM6-TRIM34 | -0.457874144 |
| 10,347 | STAT1        | -0.457807063 |
| 10,348 | PLG          | -0.457776774 |
| 10,349 | EMILIN3      | -0.457681527 |
| 10,350 | LOC130355    | -0.457541054 |
| 10,351 | L3MBTL4      | -0.457383213 |
| 10,352 | LHFPL2       | -0.457340307 |
| 10,353 | IFNA1        | -0.457306799 |
| 10,354 | SLC24A6      | -0.45694022  |
| 10,355 | STRC         | -0.456236516 |
| 10,356 | LRRC14       | -0.456231116 |
| 10,357 | ARMC4        | -0.456005434 |
| 10,358 | ZDHHC9       | -0.455929934 |
| 10,359 | ZDHHC9       | -0.455929934 |
| 10,360 | MGC4618      | -0.45579236  |
| 10,361 | RAB11FIP1    | -0.455719694 |
| 10,362 | EPHA2        | -0.455671307 |
| 10,363 | OR52M1       | -0.455645549 |
| 10,364 | TRIM43       | -0.455607645 |
| 10,365 | LOC148823    | -0.455503315 |
| 10,366 | FLJ40243     | -0.455366582 |
| 10,367 | OR8D4        | -0.455337963 |
| 10,368 | PENK         | -0.455333539 |
| 10,369 | SNCB         | -0.455312866 |
| 10,370 | NOX3         | -0.455243058 |
| 10,371 | IGFBPL1      | -0.4552072   |
| 10,372 | F13A1        | -0.455162827 |
| 10,373 | POGK         | -0.45497171  |
| 10,374 | MRPS5        | -0.4543685   |
| 10,375 | CDK7         | -0.453982868 |
| 10,376 | MCOLN1       | -0.453950792 |
| 10,377 | PBX3         | -0.453471002 |
| 10,378 | FLJ37464     | -0.453093662 |

|        |                      |              |
|--------|----------------------|--------------|
| 10,379 | <i>PDCD10</i>        | -0.453039907 |
| 10,380 | <i>PHACTR4</i>       | -0.45302807  |
| 10,381 | <i>LEPREL2</i>       | -0.452638385 |
| 10,382 | <i>MBD3</i>          | -0.452480266 |
| 10,383 | <i>CSF3</i>          | -0.452037229 |
| 10,384 | <i>SRISNF2L</i>      | -0.451851911 |
| 10,385 | <i>GPX7</i>          | -0.451504083 |
| 10,386 | <i>ITIH5L</i>        | -0.451490208 |
| 10,387 | <i>MGC46534</i>      | -0.451251037 |
| 10,388 | <i>KCNG2</i>         | -0.451186888 |
| 10,389 | <i>TMEM47</i>        | -0.451060641 |
| 10,390 | <i>SPRY2</i>         | -0.450780098 |
| 10,391 | <i>APBA2BP</i>       | -0.450771295 |
| 10,392 | <i>PHYH</i>          | -0.450505817 |
| 10,393 | <i>FGF6</i>          | -0.450426167 |
| 10,394 | <i>MYO1D</i>         | -0.450028814 |
| 10,395 | <i>RLBP1</i>         | -0.449905875 |
| 10,396 | <i>BRI3</i>          | -0.449786766 |
| 10,397 | <i>BRI3</i>          | -0.449786766 |
| 10,398 | <i>CST11</i>         | -0.449771203 |
| 10,399 | <i>LRCH3</i>         | -0.449270529 |
| 10,400 | <i>MGC11256</i>      | -0.448972094 |
| 10,401 | <i>ACBD7</i>         | -0.448883218 |
| 10,402 | <i>UBIAD1</i>        | -0.448776501 |
| 10,403 | <i>LOC399940</i>     | -0.448476039 |
| 10,404 | <i>MRPS7</i>         | -0.448051439 |
| 10,405 | <i>FBXO27</i>        | -0.447935852 |
| 10,406 | <i>TNR</i>           | -0.447521915 |
| 10,407 | <i>TRAF3IP3</i>      | -0.447388496 |
| 10,408 | <i>LOC390598</i>     | -0.447346919 |
| 10,409 | <i>ARMETL1</i>       | -0.447178327 |
| 10,410 | <i>LOC147991</i>     | -0.447157613 |
| 10,411 | <i>DKFZP434J0113</i> | -0.44707711  |
| 10,412 | <i>HCCA2</i>         | -0.447068247 |
| 10,413 | <i>KIF1B</i>         | -0.446835916 |
| 10,414 | <i>OR5B3</i>         | -0.446652775 |
| 10,415 | <i>BHD</i>           | -0.446425013 |
| 10,416 | <i>KRTAP5-3</i>      | -0.446374905 |
| 10,417 | <i>NPR1</i>          | -0.446181973 |
| 10,418 | <i>PRTN3</i>         | -0.445940077 |
| 10,419 | <i>PHB</i>           | -0.445728248 |
| 10,420 | <i>DKFZP762C1112</i> | -0.44571162  |
| 10,421 | <i>GTF2F1</i>        | -0.445695525 |
| 10,422 | <i>C9ORF126</i>      | -0.445306583 |
| 10,423 | <i>DCLRE1B</i>       | -0.445256374 |
| 10,424 | <i>MGC26694</i>      | -0.445183788 |
| 10,425 | <i>C9ORF77</i>       | -0.445112111 |

|        |               |              |
|--------|---------------|--------------|
| 10,426 | LARGE         | -0.445080225 |
| 10,427 | RFWD3         | -0.445039524 |
| 10,428 | LSM6          | -0.444979069 |
| 10,429 | LSM6          | -0.444979069 |
| 10,430 | STK11         | -0.444297156 |
| 10,431 | FLJ22222      | -0.444280621 |
| 10,432 | AMID          | -0.44425926  |
| 10,433 | MARVELD3      | -0.44415659  |
| 10,434 | FLJ12363      | -0.443878859 |
| 10,435 | LOC90806      | -0.443632222 |
| 10,436 | LOC93081      | -0.443345587 |
| 10,437 | DKFZP761P1121 | -0.443053571 |
| 10,438 | SLC35B4       | -0.442572464 |
| 10,439 | ZNF605        | -0.442504485 |
| 10,440 | PIGR          | -0.442426613 |
| 10,441 | C21ORF107     | -0.442087876 |
| 10,442 | LOC642446     | -0.441754167 |
| 10,443 | SLC5A1        | -0.440495191 |
| 10,444 | GTF2H5        | -0.44047343  |
| 10,445 | SERPINI2      | -0.440224686 |
| 10,446 | TRIM49        | -0.440125351 |
| 10,447 | DKFZP547C176  | -0.440029783 |
| 10,448 | SNAG1         | -0.440020258 |
| 10,449 | FLJ10116      | -0.439960114 |
| 10,450 | LMX1A         | -0.439856222 |
| 10,451 | LOXL1         | -0.439798409 |
| 10,452 | PBOV1         | -0.439589104 |
| 10,453 | OR4F17        | -0.439347427 |
| 10,454 | ASF1A         | -0.439013521 |
| 10,455 | PIWIL2        | -0.439013143 |
| 10,456 | EHD3          | -0.438907972 |
| 10,457 | SLC6A13       | -0.438791487 |
| 10,458 | PX19          | -0.43853334  |
| 10,459 | KIAA1183      | -0.438444618 |
| 10,460 | GRTP1         | -0.43813812  |
| 10,461 | OSBP2         | -0.43808357  |
| 10,462 | RAB36         | -0.438052992 |
| 10,463 | PGAP1         | -0.437889889 |
| 10,464 | ZFP36L1       | -0.437369979 |
| 10,465 | SELT          | -0.43735272  |
| 10,466 | LOC285193     | -0.437259598 |
| 10,467 | MGC33887      | -0.437240787 |
| 10,468 | RPIP8         | -0.437207546 |
| 10,469 | FLJ22471      | -0.43707365  |
| 10,470 | NUP214        | -0.43702976  |
| 10,471 | COL4A1        | -0.436977036 |
| 10,472 | ZP3           | -0.436948425 |

|        |                       |              |
|--------|-----------------------|--------------|
| 10,473 | <i>LSP1</i>           | -0.436924039 |
| 10,474 | <i>AKT1</i>           | -0.43659976  |
| 10,475 | <i>ANKRD17</i>        | -0.436440284 |
| 10,476 | <i>GPR173</i>         | -0.43642899  |
| 10,477 | <i>MGC4766</i>        | -0.43628525  |
| 10,478 | <i>LOC441425</i>      | -0.436011651 |
| 10,479 | <i>TFAM</i>           | -0.435945395 |
| 10,480 | <i>TOR1B</i>          | -0.435549242 |
| 10,481 | <i>SLCO2B1</i>        | -0.435525263 |
| 10,482 | <i>TARBP1</i>         | -0.435492765 |
| 10,483 | <i>PPIB</i>           | -0.435347449 |
| 10,484 | <i>PPP2R5C</i>        | -0.435298534 |
| 10,485 | <i>LOC389151</i>      | -0.4350162   |
| 10,486 | <i>BETA4GALNAC-T4</i> | -0.434901605 |
| 10,487 | <i>EDIL3</i>          | -0.434901437 |
| 10,488 | <i>ANUBL1</i>         | -0.434901437 |
| 10,489 | <i>MYLK</i>           | -0.434822342 |
| 10,490 | <i>GUCY1A3</i>        | -0.434780156 |
| 10,491 | <i>MYT1L</i>          | -0.434606152 |
| 10,492 | <i>PSKH1</i>          | -0.434231891 |
| 10,493 | <i>TNNT3</i>          | -0.434211676 |
| 10,494 | <i>GCHFR</i>          | -0.434124527 |
| 10,495 | <i>DCUN1D4</i>        | -0.434038748 |
| 10,496 | <i>XPO6</i>           | -0.434032176 |
| 10,497 | <i>PX19</i>           | -0.433917524 |
| 10,498 | <i>MGC72001</i>       | -0.433574178 |
| 10,499 | <i>FLJ21839</i>       | -0.433493252 |
| 10,500 | <i>EPB41L4B</i>       | -0.433305819 |
| 10,501 | <i>ZNF84</i>          | -0.43329394  |
| 10,502 | <i>ANTXR2</i>         | -0.433252399 |
| 10,503 | <i>CTPS2</i>          | -0.433003299 |
| 10,504 | <i>FLJ31031</i>       | -0.432989105 |
| 10,505 | <i>MDS032</i>         | -0.432878953 |
| 10,506 | <i>TIMELESS</i>       | -0.432864606 |
| 10,507 | <i>PVRL4</i>          | -0.432860252 |
| 10,508 | <i>RASA1</i>          | -0.432812853 |
| 10,509 | <i>DKFZP434N062</i>   | -0.432778042 |
| 10,510 | <i>WNT8B</i>          | -0.43260094  |
| 10,511 | <i>OR5A2</i>          | -0.432416673 |
| 10,512 | <i>CD80</i>           | -0.432324458 |
| 10,513 | <i>LOC399726</i>      | -0.432265647 |
| 10,514 | <i>HYPK</i>           | -0.431978267 |
| 10,515 | <i>FREQ</i>           | -0.431808863 |
| 10,516 | <i>FLJ23441</i>       | -0.431656217 |
| 10,517 | <i>LOC317671</i>      | -0.431642661 |
| 10,518 | <i>OR7G2</i>          | -0.431537335 |
| 10,519 | <i>LOC157567</i>      | -0.431465147 |



|        |               |              |
|--------|---------------|--------------|
| 10,520 | VPS16         | -0.430866789 |
| 10,521 | RDBP          | -0.430861452 |
| 10,522 | FLJ34283      | -0.430329394 |
| 10,523 | FLJ38144      | -0.430293225 |
| 10,524 | UBN1          | -0.430136121 |
| 10,525 | UPK2          | -0.429976391 |
| 10,526 | MLYCD         | -0.429676545 |
| 10,527 | TLR4          | -0.429623686 |
| 10,528 | NUCB1         | -0.429387956 |
| 10,529 | BAHD1         | -0.429187285 |
| 10,530 | KIAA1008      | -0.429187068 |
| 10,531 | CHST5         | -0.428838444 |
| 10,532 | SCGB3A1       | -0.42878751  |
| 10,533 | KIAA0433      | -0.428304888 |
| 10,534 | LOC553158     | -0.427783191 |
| 10,535 | KIR2DL5B      | -0.427601786 |
| 10,536 | SLC2A5        | -0.427039771 |
| 10,537 | PCNX          | -0.427014062 |
| 10,538 | TSPAN16       | -0.42681967  |
| 10,539 | HSPA8         | -0.426291943 |
| 10,540 | PER3          | -0.426088964 |
| 10,541 | SLC36A3       | -0.425946707 |
| 10,542 | FLJ14397      | -0.425919207 |
| 10,543 | CALR          | -0.425648534 |
| 10,544 | DKFZP434M0331 | -0.425647116 |
| 10,545 | MGC14289      | -0.425494755 |
| 10,546 | ZBTB42        | -0.425487258 |
| 10,547 | GADD45G       | -0.425415506 |
| 10,548 | C6ORF149      | -0.425111664 |
| 10,549 | OR7C2         | -0.425075953 |
| 10,550 | ZNF278        | -0.424821942 |
| 10,551 | FAT4          | -0.424701889 |
| 10,552 | TRIM73        | -0.424569222 |
| 10,553 | LOC338692     | -0.424361187 |
| 10,554 | PARK2         | -0.424316503 |
| 10,555 | CLPTM1        | -0.424166896 |
| 10,556 | KIAA1811      | -0.42395351  |
| 10,557 | SNRPC         | -0.423924309 |
| 10,558 | UBXD4         | -0.423858607 |
| 10,559 | ADCY1         | -0.423412475 |
| 10,560 | UNC5A         | -0.422803883 |
| 10,561 | ZNF574        | -0.422389506 |
| 10,562 | FLJ45778      | -0.422280087 |
| 10,563 | FLJ90165      | -0.422051543 |
| 10,564 | LOC441294     | -0.422018777 |
| 10,565 | PTPNS1        | -0.421980846 |
| 10,566 | KIAA1956      | -0.421929215 |

|        |                      |              |
|--------|----------------------|--------------|
| 10,567 | <i>FLJ31166</i>      | -0.421879276 |
| 10,568 | <i>ITLN2</i>         | -0.421639229 |
| 10,569 | <i>KRT25C</i>        | -0.421006811 |
| 10,570 | <i>ACSL6</i>         | -0.420727721 |
| 10,571 | <i>FLJ12484</i>      | -0.420668775 |
| 10,572 | <i>KIAA2028</i>      | -0.420666836 |
| 10,573 | <i>PKNOX2</i>        | -0.420351709 |
| 10,574 | <i>GOSR1</i>         | -0.420002606 |
| 10,575 | <i>FLJ20280</i>      | -0.419795965 |
| 10,576 | <i>CASP7</i>         | -0.419779617 |
| 10,577 | <i>DKFZP547D2210</i> | -0.419760605 |
| 10,578 | <i>STARD6</i>        | -0.419737879 |
| 10,579 | <i>REPRIMO</i>       | -0.41956492  |
| 10,580 | <i>FLJ20643</i>      | -0.41945172  |
| 10,581 | <i>IL4I1</i>         | -0.419013201 |
| 10,582 | <i>FLJ40722</i>      | -0.418950491 |
| 10,583 | <i>DDIT4</i>         | -0.418919085 |
| 10,584 | <i>KIAA2001</i>      | -0.418879142 |
| 10,585 | <i>GPR87</i>         | -0.418776096 |
| 10,586 | <i>PNRC1</i>         | -0.418628685 |
| 10,587 | <i>GTPBP5</i>        | -0.418449654 |
| 10,588 | <i>S100A6</i>        | -0.418442224 |
| 10,589 | <i>NUPL1</i>         | -0.418374538 |
| 10,590 | <i>HSPD1</i>         | -0.418329304 |
| 10,591 | <i>SPIRE2</i>        | -0.418306768 |
| 10,592 | <i>POLN</i>          | -0.418249075 |
| 10,593 | <i>C20ORF59</i>      | -0.418131941 |
| 10,594 | <i>LRMP</i>          | -0.418102441 |
| 10,595 | <i>ERO1L</i>         | -0.417874047 |
| 10,596 | <i>KIF26B</i>        | -0.417829833 |
| 10,597 | <i>MTX1</i>          | -0.417704006 |
| 10,598 | <i>KUB3</i>          | -0.417683346 |
| 10,599 | <i>PLA2G7</i>        | -0.417613979 |
| 10,600 | <i>GIPC3</i>         | -0.417151437 |
| 10,601 | <i>FLRT3</i>         | -0.417148995 |
| 10,602 | <i>KIF2B</i>         | -0.417051001 |
| 10,603 | <i>MDH2</i>          | -0.41678413  |
| 10,604 | <i>CANP</i>          | -0.416764657 |
| 10,605 | <i>MYL2</i>          | -0.416745521 |
| 10,606 | <i>LDLR</i>          | -0.416130719 |
| 10,607 | <i>LOC343521</i>     | -0.415938733 |
| 10,608 | <i>BIRC6</i>         | -0.415664476 |
| 10,609 | <i>PAN3</i>          | -0.415521152 |
| 10,610 | <i>FCER1G</i>        | -0.415443845 |
| 10,611 | <i>ZBTB9</i>         | -0.415403939 |
| 10,612 | <i>IGSF10</i>        | -0.415334617 |
| 10,613 | <i>ITGAM</i>         | -0.4152215   |

|        |                  |              |
|--------|------------------|--------------|
| 10,614 | <i>PARD6G</i>    | -0.415212452 |
| 10,615 | <i>PELO</i>      | -0.415079708 |
| 10,616 | <i>FOXE3</i>     | -0.414422251 |
| 10,617 | <i>PAX9</i>      | -0.4141438   |
| 10,618 | <i>MED8</i>      | -0.414079142 |
| 10,619 | <i>MYO5B</i>     | -0.41397135  |
| 10,620 | <i>CXORF2</i>    | -0.413741643 |
| 10,621 | <i>TMEM30B</i>   | -0.413490602 |
| 10,622 | <i>SMN2</i>      | -0.412961205 |
| 10,623 | <i>HSPA1L</i>    | -0.412882994 |
| 10,624 | <i>TITF1</i>     | -0.412874599 |
| 10,625 | <i>GBL</i>       | -0.412845561 |
| 10,626 | <i>PAP</i>       | -0.4128083   |
| 10,627 | <i>ZNF323</i>    | -0.412792964 |
| 10,628 | <i>B3GNT4</i>    | -0.412788289 |
| 10,629 | <i>SGCZ</i>      | -0.412749118 |
| 10,630 | <i>CNTN6</i>     | -0.412407706 |
| 10,631 | <i>MS4A10</i>    | -0.412398924 |
| 10,632 | <i>KIAA0090</i>  | -0.412301234 |
| 10,633 | <i>FER</i>       | -0.411587    |
| 10,634 | <i>PPARGC1B</i>  | -0.411432471 |
| 10,635 | <i>ADAMTS13</i>  | -0.411355062 |
| 10,636 | <i>ASB17</i>     | -0.411300527 |
| 10,637 | <i>PCYOX1</i>    | -0.411002669 |
| 10,638 | <i>SPATS2</i>    | -0.410951609 |
| 10,639 | <i>RAP2B</i>     | -0.410885833 |
| 10,640 | <i>TSP50</i>     | -0.410598634 |
| 10,641 | <i>LOC339745</i> | -0.410509027 |
| 10,642 | <i>MTMR2</i>     | -0.410428156 |
| 10,643 | <i>KIAA0795</i>  | -0.410077159 |
| 10,644 | <i>LOC199964</i> | -0.410067933 |
| 10,645 | <i>ATP10B</i>    | -0.41004792  |
| 10,646 | <i>MAP3K6</i>    | -0.40995737  |
| 10,647 | <i>GOLGA3</i>    | -0.409886869 |
| 10,648 | <i>PF4V1</i>     | -0.409766978 |
| 10,649 | <i>RASGEF1A</i>  | -0.409705589 |
| 10,650 | <i>TNFRSF11B</i> | -0.409664603 |
| 10,651 | <i>PER1</i>      | -0.409480505 |
| 10,652 | <i>DDX4</i>      | -0.409090231 |
| 10,653 | <i>ASPH</i>      | -0.408932509 |
| 10,654 | <i>ABT1</i>      | -0.408929331 |
| 10,655 | <i>LMOD3</i>     | -0.408857528 |
| 10,656 | <i>MGC20419</i>  | -0.40873193  |
| 10,657 | <i>C14ORF108</i> | -0.408710854 |
| 10,658 | <i>CRISPLD2</i>  | -0.408686422 |
| 10,659 | <i>SCN9A</i>     | -0.40830641  |
| 10,660 | <i>ATP5A1</i>    | -0.407936951 |

|        |                     |              |
|--------|---------------------|--------------|
| 10,661 | <i>LOC167127</i>    | -0.407826692 |
| 10,662 | <i>FLJ34283</i>     | -0.407619492 |
| 10,663 | <i>FLJ39822</i>     | -0.407421721 |
| 10,664 | <i>EPS8</i>         | -0.407159987 |
| 10,665 | <i>PLSCR4</i>       | -0.407151617 |
| 10,666 | <i>AOC3</i>         | -0.406983242 |
| 10,667 | <i>BBS7</i>         | -0.406977147 |
| 10,668 | <i>DSG1</i>         | -0.406966024 |
| 10,669 | <i>PTPRT</i>        | -0.406929141 |
| 10,670 | <i>C14ORF105</i>    | -0.406779735 |
| 10,671 | <i>LOC646174</i>    | -0.406750934 |
| 10,672 | <i>SCRIB</i>        | -0.406388936 |
| 10,673 | <i>DKFZP564M082</i> | -0.405997775 |
| 10,674 | <i>STK4</i>         | -0.405912935 |
| 10,675 | <i>KIAA0543</i>     | -0.405812673 |
| 10,676 | <i>GGA2</i>         | -0.405573043 |
| 10,677 | <i>NGL-1</i>        | -0.405537231 |
| 10,678 | <i>CTNNBIP1</i>     | -0.405304753 |
| 10,679 | <i>CSTF2T</i>       | -0.405187129 |
| 10,680 | <i>SHMT2</i>        | -0.405186818 |
| 10,681 | <i>ABL1</i>         | -0.40515259  |
| 10,682 | <i>ULBP3</i>        | -0.405038957 |
| 10,683 | <i>FLJ10560</i>     | -0.404704928 |
| 10,684 | <i>KCTD11</i>       | -0.404464707 |
| 10,685 | <i>SPRY4</i>        | -0.40420797  |
| 10,686 | <i>C1orf165</i>     | -0.403768581 |
| 10,687 | <i>FRMPD1</i>       | -0.403704666 |
| 10,688 | <i>SPSB2</i>        | -0.40359237  |
| 10,689 | <i>ACHE</i>         | -0.403587814 |
| 10,690 | <i>C9ORF100S</i>    | -0.403549559 |
| 10,691 | <i>RCN1</i>         | -0.403136104 |
| 10,692 | <i>LPGAT1</i>       | -0.402447167 |
| 10,693 | <i>HNF4A</i>        | -0.402319011 |
| 10,694 | <i>MGC29671</i>     | -0.40226568  |
| 10,695 | <i>ANKRD1</i>       | -0.402136652 |
| 10,696 | <i>FLJ32855</i>     | -0.402112097 |
| 10,697 | <i>OR8U9</i>        | -0.402013292 |
| 10,698 | <i>ARHGEF10</i>     | -0.401887595 |
| 10,699 | <i>KIAA0318</i>     | -0.401691678 |
| 10,700 | <i>DKFZP566M114</i> | -0.401590468 |
| 10,701 | <i>TRAPPC6B</i>     | -0.401480318 |
| 10,702 | <i>DSCR5</i>        | -0.401383813 |
| 10,703 | <i>KRT16</i>        | -0.401148408 |
| 10,704 | <i>PKD1L2</i>       | -0.401124146 |
| 10,705 | <i>STK17B</i>       | -0.401081722 |
| 10,706 | <i>ZNF295</i>       | -0.401013934 |
| 10,707 | <i>FLJ43080</i>     | -0.400986657 |

|        |                  |              |
|--------|------------------|--------------|
| 10,708 | <i>SEP1</i>      | -0.400851072 |
| 10,709 | <i>OR2T8</i>     | -0.400835575 |
| 10,710 | <i>FLJ20084</i>  | -0.400555499 |
| 10,711 | <i>PTK9</i>      | -0.400489755 |
| 10,712 | <i>PTPN6</i>     | -0.400396686 |
| 10,713 | <i>AKR1C4</i>    | -0.400346706 |
| 10,714 | <i>CDKL2</i>     | -0.400327401 |
| 10,715 | <i>CYP4F11</i>   | -0.400242996 |
| 10,716 | <i>MDGA1</i>     | -0.400164939 |
| 10,717 | <i>OR6N1</i>     | -0.399963012 |
| 10,718 | <i>PGR1</i>      | -0.399898852 |
| 10,719 | <i>MRPS16</i>    | -0.399805767 |
| 10,720 | <i>ZNF300</i>    | -0.399679574 |
| 10,721 | <i>MIB2</i>      | -0.399544197 |
| 10,722 | <i>SFXN5</i>     | -0.399450922 |
| 10,723 | <i>HSD17B8</i>   | -0.399280104 |
| 10,724 | <i>RBM12</i>     | -0.399152685 |
| 10,725 | <i>LIMS2</i>     | -0.399038853 |
| 10,726 | <i>LIMS2</i>     | -0.399038853 |
| 10,727 | <i>FRAT1</i>     | -0.398798657 |
| 10,728 | <i>MGC14141</i>  | -0.398701789 |
| 10,729 | <i>SLCO1B3</i>   | -0.398499442 |
| 10,730 | <i>LILRB5</i>    | -0.398151771 |
| 10,731 | <i>NEU2</i>      | -0.398109576 |
| 10,732 | <i>GCA</i>       | -0.397473752 |
| 10,733 | <i>SLC39A13</i>  | -0.397446582 |
| 10,734 | <i>ILT7</i>      | -0.397330924 |
| 10,735 | <i>PAPD1</i>     | -0.39727168  |
| 10,736 | <i>CTAG1A</i>    | -0.397155629 |
| 10,737 | <i>RRAGB</i>     | -0.397078324 |
| 10,738 | <i>CENTD2</i>    | -0.397058863 |
| 10,739 | <i>MGC4796</i>   | -0.396991771 |
| 10,740 | <i>MTFMT</i>     | -0.396775681 |
| 10,741 | <i>KIAA1522</i>  | -0.396710033 |
| 10,742 | <i>PIK3AP1</i>   | -0.396709157 |
| 10,743 | <i>RRAS</i>      | -0.396609143 |
| 10,744 | <i>ASH2L</i>     | -0.396435947 |
| 10,745 | <i>GTPBP1</i>    | -0.396312648 |
| 10,746 | <i>TU12B1-TY</i> | -0.396093086 |
| 10,747 | <i>HIST1H3H</i>  | -0.396057929 |
| 10,748 | <i>OFD1</i>      | -0.395716782 |
| 10,749 | <i>ZFP37</i>     | -0.395359238 |
| 10,750 | <i>MGC2198</i>   | -0.395292005 |
| 10,751 | <i>CACNA1A</i>   | -0.394979475 |
| 10,752 | <i>HSMDPKIN</i>  | -0.394918288 |
| 10,753 | <i>PHF5A</i>     | -0.394763054 |
| 10,754 | <i>CHRNB4</i>    | -0.394428941 |

|        |                  |              |
|--------|------------------|--------------|
| 10,755 | <i>RAD51C</i>    | -0.3943124   |
| 10,756 | <i>GPR8</i>      | -0.394310624 |
| 10,757 | <i>LOC338759</i> | -0.394154133 |
| 10,758 | <i>STAB2</i>     | -0.393938983 |
| 10,759 | <i>TNFSF5IP1</i> | -0.393719299 |
| 10,760 | <i>PC4</i>       | -0.39354533  |
| 10,761 | <i>CAPSL</i>     | -0.393538406 |
| 10,762 | <i>B3GALT6</i>   | -0.393157832 |
| 10,763 | <i>FLJ33069</i>  | -0.393137167 |
| 10,764 | <i>WTAP</i>      | -0.393041776 |
| 10,765 | <i>ALDH8A1</i>   | -0.392740145 |
| 10,766 | <i>RBPM5</i>     | -0.392715666 |
| 10,767 | <i>FLJ23322</i>  | -0.392641198 |
| 10,768 | <i>MAPK4</i>     | -0.392570073 |
| 10,769 | <i>VPS28</i>     | -0.3925613   |
| 10,770 | <i>AFM</i>       | -0.392534326 |
| 10,771 | <i>IL18RAP</i>   | -0.392513317 |
| 10,772 | <i>GPR85</i>     | -0.39244145  |
| 10,773 | <i>TPD52L2</i>   | -0.392326298 |
| 10,774 | <i>NANS</i>      | -0.392280056 |
| 10,775 | <i>GRM7</i>      | -0.392230746 |
| 10,776 | <i>NR2E3</i>     | -0.392160664 |
| 10,777 | <i>HSPC138</i>   | -0.392095947 |
| 10,778 | <i>OLFM2</i>     | -0.391922709 |
| 10,779 | <i>TMCC1</i>     | -0.391865191 |
| 10,780 | <i>RFP2</i>      | -0.39154384  |
| 10,781 | <i>LGP2</i>      | -0.391363828 |
| 10,782 | <i>ZNF206</i>    | -0.391339758 |
| 10,783 | <i>SIM1</i>      | -0.391238227 |
| 10,784 | <i>SSFA2</i>     | -0.390804887 |
| 10,785 | <i>CETN3</i>     | -0.39075976  |
| 10,786 | <i>PAFAH1B2</i>  | -0.390715187 |
| 10,787 | <i>PAPOLA</i>    | -0.390672639 |
| 10,788 | <i>LOC375323</i> | -0.390589075 |
| 10,789 | <i>LZTR1</i>     | -0.390404629 |
| 10,790 | <i>KIAA0056</i>  | -0.390328064 |
| 10,791 | <i>LONRF2</i>    | -0.390199333 |
| 10,792 | <i>MTO1</i>      | -0.390165794 |
| 10,793 | <i>COL19A1</i>   | -0.389636098 |
| 10,794 | <i>SLC30A4</i>   | -0.389538584 |
| 10,795 | <i>DEFB118</i>   | -0.38903505  |
| 10,796 | <i>ITPR2</i>     | -0.388989975 |
| 10,797 | <i>TATDN3</i>    | -0.388798442 |
| 10,798 | <i>ZNF560</i>    | -0.388687824 |
| 10,799 | <i>HIST1H3D</i>  | -0.388657532 |
| 10,800 | <i>FLJ37562</i>  | -0.388638302 |
| 10,801 | <i>FLJ20533</i>  | -0.3884107   |

|        |                  |              |
|--------|------------------|--------------|
| 10,802 | <i>TMED6</i>     | -0.387918751 |
| 10,803 | <i>MGC35043</i>  | -0.387832688 |
| 10,804 | <i>MAP3K7</i>    | -0.387648044 |
| 10,805 | <i>UBE2E3</i>    | -0.387462106 |
| 10,806 | <i>ANKRD36</i>   | -0.387411585 |
| 10,807 | <i>WBP5</i>      | -0.386878242 |
| 10,808 | <i>DDX27</i>     | -0.386713062 |
| 10,809 | <i>KIAA1244</i>  | -0.386589722 |
| 10,810 | <i>MGC33648</i>  | -0.386304466 |
| 10,811 | <i>CHRM4</i>     | -0.386001232 |
| 10,812 | <i>KCNN3</i>     | -0.385954136 |
| 10,813 | <i>GIPR</i>      | -0.385878245 |
| 10,814 | <i>TRIP4</i>     | -0.385837855 |
| 10,815 | <i>SR-A1</i>     | -0.38572895  |
| 10,816 | <i>S100A11</i>   | -0.385593854 |
| 10,817 | <i>SFRS4</i>     | -0.385466009 |
| 10,818 | <i>PCDHB16</i>   | -0.385457104 |
| 10,819 | <i>RAVER1</i>    | -0.385416021 |
| 10,820 | <i>TP53RK</i>    | -0.38528818  |
| 10,821 | <i>LOC150356</i> | -0.385239268 |
| 10,822 | <i>FLJ90661</i>  | -0.385192918 |
| 10,823 | <i>HAPLN4</i>    | -0.384926878 |
| 10,824 | <i>ZFR</i>       | -0.384835399 |
| 10,825 | <i>TM7SF3</i>    | -0.383954134 |
| 10,826 | <i>HRG</i>       | -0.383701845 |
| 10,827 | <i>SSR4</i>      | -0.383645441 |
| 10,828 | <i>DEFB115</i>   | -0.383623585 |
| 10,829 | <i>MT1A</i>      | -0.38356171  |
| 10,830 | <i>HBB</i>       | -0.383481008 |
| 10,831 | <i>TNNC2</i>     | -0.383281289 |
| 10,832 | <i>BARX2</i>     | -0.383205302 |
| 10,833 | <i>NEDD1</i>     | -0.382404249 |
| 10,834 | <i>IFNA21</i>    | -0.382104896 |
| 10,835 | <i>TEX13B</i>    | -0.382059764 |
| 10,836 | <i>DSCR4</i>     | -0.382059764 |
| 10,837 | <i>TIMM50</i>    | -0.381859002 |
| 10,838 | <i>SLC22A17</i>  | -0.381826906 |
| 10,839 | <i>LPPR4</i>     | -0.381810924 |
| 10,840 | <i>C6ORF170</i>  | -0.381571068 |
| 10,841 | <i>PAK4</i>      | -0.381461267 |
| 10,842 | <i>TM7SF1</i>    | -0.381299579 |
| 10,843 | <i>GFRA3</i>     | -0.381293759 |
| 10,844 | <i>TCL1B</i>     | -0.381168355 |
| 10,845 | <i>LOC339210</i> | -0.38080419  |
| 10,846 | <i>MGC29463</i>  | -0.380636171 |
| 10,847 | <i>C10ORF94</i>  | -0.380562181 |
| 10,848 | <i>FLJ10945</i>  | -0.380382245 |

|        |                  |              |
|--------|------------------|--------------|
| 10,849 | <i>C6ORF106</i>  | -0.380284399 |
| 10,850 | <i>CIDEB</i>     | -0.38025449  |
| 10,851 | <i>C6ORF80</i>   | -0.380069173 |
| 10,852 | <i>TMEM1</i>     | -0.379823455 |
| 10,853 | <i>HSPB1</i>     | -0.379620799 |
| 10,854 | <i>FLJ43692</i>  | -0.379549325 |
| 10,855 | <i>BRPF3</i>     | -0.379419076 |
| 10,856 | <i>WDFY1</i>     | -0.379321029 |
| 10,857 | <i>COL7A1</i>    | -0.379142884 |
| 10,858 | <i>BAL</i>       | -0.379097788 |
| 10,859 | <i>CHCHD2</i>    | -0.379067853 |
| 10,860 | <i>KIAA1279</i>  | -0.378711124 |
| 10,861 | <i>TCOF1</i>     | -0.378588086 |
| 10,862 | <i>RHPN2</i>     | -0.37821991  |
| 10,863 | <i>FLJ25102</i>  | -0.378093849 |
| 10,864 | <i>SYTL4</i>     | -0.377952584 |
| 10,865 | <i>ITGA7</i>     | -0.377946867 |
| 10,866 | <i>MRPL50</i>    | -0.377826025 |
| 10,867 | <i>C8ORF21</i>   | -0.377682019 |
| 10,868 | <i>LHX5</i>      | -0.377639663 |
| 10,869 | <i>LOC164153</i> | -0.377540713 |
| 10,870 | <i>C6ORF213</i>  | -0.377421471 |
| 10,871 | <i>FANCC</i>     | -0.377349961 |
| 10,872 | <i>KIAA0907</i>  | -0.377281305 |
| 10,873 | <i>MGC20533</i>  | -0.377251527 |
| 10,874 | <i>JMJD2D</i>    | -0.377202938 |
| 10,875 | <i>LOC401272</i> | -0.377180959 |
| 10,876 | <i>C6ORF78</i>   | -0.377129428 |
| 10,877 | <i>LACE1</i>     | -0.377118788 |
| 10,878 | <i>FLJ31528</i>  | -0.377085538 |
| 10,879 | <i>HLX1</i>      | -0.376780868 |
| 10,880 | <i>C3orf74</i>   | -0.376623396 |
| 10,881 | <i>ARPC5</i>     | -0.376357159 |
| 10,882 | <i>SENP7</i>     | -0.376305887 |
| 10,883 | <i>PGM3</i>      | -0.375585918 |
| 10,884 | <i>OR51A2</i>    | -0.375551726 |
| 10,885 | <i>OR51V1</i>    | -0.375491879 |
| 10,886 | <i>GBA3</i>      | -0.375216791 |
| 10,887 | <i>NEK7</i>      | -0.374944331 |
| 10,888 | <i>TAGLN</i>     | -0.374765535 |
| 10,889 | <i>C14ORF93</i>  | -0.37433904  |
| 10,890 | <i>TUSC5</i>     | -0.374180444 |
| 10,891 | <i>BST1</i>      | -0.374159067 |
| 10,892 | <i>PCDHB13</i>   | -0.374138743 |
| 10,893 | <i>NRP2</i>      | -0.374114243 |
| 10,894 | <i>SAG</i>       | -0.374068837 |
| 10,895 | <i>WNT10B</i>    | -0.373893572 |



|        |                      |              |
|--------|----------------------|--------------|
| 10,896 | <i>DKFZP434G1415</i> | -0.373802553 |
| 10,897 | <i>CEP72</i>         | -0.37360666  |
| 10,898 | <i>PRMT7</i>         | -0.373200944 |
| 10,899 | <i>FLJ22557</i>      | -0.37304118  |
| 10,900 | <i>IKBKB</i>         | -0.373003754 |
| 10,901 | <i>KLPH</i>          | -0.372800565 |
| 10,902 | <i>NALP10</i>        | -0.372361876 |
| 10,903 | <i>VAMP2</i>         | -0.37227852  |
| 10,904 | <i>LOC133308</i>     | -0.372179503 |
| 10,905 | <i>DGKG</i>          | -0.371363147 |
| 10,906 | <i>FKSG2</i>         | -0.370977031 |
| 10,907 | <i>LTA4H</i>         | -0.370831967 |
| 10,908 | <i>C10ORF125</i>     | -0.370581429 |
| 10,909 | <i>PYC1</i>          | -0.37043082  |
| 10,910 | <i>TTC13</i>         | -0.370392896 |
| 10,911 | <i>KCNN2</i>         | -0.370325873 |
| 10,912 | <i>LMAN2</i>         | -0.370294289 |
| 10,913 | <i>CCR2</i>          | -0.370159844 |
| 10,914 | <i>WARS</i>          | -0.370089571 |
| 10,915 | <i>LPIN1</i>         | -0.369674279 |
| 10,916 | <i>EMID1</i>         | -0.369542721 |
| 10,917 | <i>EVI5</i>          | -0.369542721 |
| 10,918 | <i>PANX2</i>         | -0.369489662 |
| 10,919 | <i>SUSD2</i>         | -0.369418669 |
| 10,920 | <i>RPS19</i>         | -0.369333872 |
| 10,921 | <i>MGC10067</i>      | -0.369325438 |
| 10,922 | <i>FLJ38377</i>      | -0.369253905 |
| 10,923 | <i>CYP7B1</i>        | -0.369114715 |
| 10,924 | <i>ABHD8</i>         | -0.368918698 |
| 10,925 | <i>MGC2731</i>       | -0.368613861 |
| 10,926 | <i>ITM2A</i>         | -0.368606326 |
| 10,927 | <i>POLR2C</i>        | -0.368548062 |
| 10,928 | <i>PSEN1</i>         | -0.368539698 |
| 10,929 | <i>ZNF537</i>        | -0.368497888 |
| 10,930 | <i>NKIRAS1</i>       | -0.368258729 |
| 10,931 | <i>LNX1</i>          | -0.368146596 |
| 10,932 | <i>RHCE</i>          | -0.367634943 |
| 10,933 | <i>FLJ34283</i>      | -0.367632151 |
| 10,934 | <i>COG2</i>          | -0.367585017 |
| 10,935 | <i>FGF3</i>          | -0.367504644 |
| 10,936 | <i>DEFB134</i>       | -0.367437126 |
| 10,937 | <i>CNKSR2</i>        | -0.367431388 |
| 10,938 | <i>ZNF674</i>        | -0.367350586 |
| 10,939 | <i>SLD5</i>          | -0.367045784 |
| 10,940 | <i>FLJ10996</i>      | -0.366575879 |
| 10,941 | <i>STAR</i>          | -0.366496961 |
| 10,942 | <i>SPRR4</i>         | -0.366188465 |

|        |                      |              |
|--------|----------------------|--------------|
| 10,943 | <i>TLOC1</i>         | -0.366163452 |
| 10,944 | <i>C9ORF127</i>      | -0.36613119  |
| 10,945 | <i>INOC1</i>         | -0.366058566 |
| 10,946 | <i>MRPL9</i>         | -0.365828048 |
| 10,947 | <i>KIAA1632</i>      | -0.365695759 |
| 10,948 | <i>ALCAM</i>         | -0.36561558  |
| 10,949 | <i>MOGAT2</i>        | -0.365573099 |
| 10,950 | <i>GGA1</i>          | -0.365231901 |
| 10,951 | <i>ZNF407</i>        | -0.365175894 |
| 10,952 | <i>KIAA1573</i>      | -0.365113961 |
| 10,953 | <i>CHKA</i>          | -0.364976866 |
| 10,954 | <i>OR1D2</i>         | -0.364795564 |
| 10,955 | <i>TUBGCP5</i>       | -0.364608326 |
| 10,956 | <i>RP11-186O14.2</i> | -0.364568461 |
| 10,957 | <i>C10ORF10</i>      | -0.364497578 |
| 10,958 | <i>CCL17</i>         | -0.364356327 |
| 10,959 | <i>LOC201725</i>     | -0.364211294 |
| 10,960 | <i>SSA1</i>          | -0.364184157 |
| 10,961 | <i>MINK</i>          | -0.363261632 |
| 10,962 | <i>ASB3</i>          | -0.362878381 |
| 10,963 | <i>SLC34A3</i>       | -0.362846079 |
| 10,964 | <i>FBXL14</i>        | -0.362582984 |
| 10,965 | <i>ST8SIA2</i>       | -0.362424104 |
| 10,966 | <i>LOC51270</i>      | -0.362390803 |
| 10,967 | <i>ARHGAP8</i>       | -0.36220875  |
| 10,968 | <i>PAX5</i>          | -0.362054025 |
| 10,969 | <i>KIAA1333</i>      | -0.361662605 |
| 10,970 | <i>PNPT1</i>         | -0.361659299 |
| 10,971 | <i>FLJ32363</i>      | -0.361033433 |
| 10,972 | <i>OSBPL8</i>        | -0.360937171 |
| 10,973 | <i>FAAH</i>          | -0.360703445 |
| 10,974 | <i>CENTB5</i>        | -0.360440143 |
| 10,975 | <i>ZXDB</i>          | -0.359932635 |
| 10,976 | <i>SLBP</i>          | -0.359860564 |
| 10,977 | <i>DKFZP434K1815</i> | -0.359824538 |
| 10,978 | <i>HOXB1</i>         | -0.359818703 |
| 10,979 | <i>TXNDC</i>         | -0.359750104 |
| 10,980 | <i>SLC7A6</i>        | -0.359729231 |
| 10,981 | <i>CCL8</i>          | -0.359508899 |
| 10,982 | <i>CCL8</i>          | -0.359508899 |
| 10,983 | <i>KBTBD11</i>       | -0.359191181 |
| 10,984 | <i>APBB2</i>         | -0.359139884 |
| 10,985 | <i>LOC135935</i>     | -0.359093362 |
| 10,986 | <i>TCEB2</i>         | -0.358600952 |
| 10,987 | <i>TBC1D10B</i>      | -0.358582964 |
| 10,988 | <i>YOD1</i>          | -0.358278298 |
| 10,989 | <i>IL20</i>          | -0.358087926 |

|        |                  |              |
|--------|------------------|--------------|
| 10,990 | <i>MID1</i>      | -0.358086276 |
| 10,991 | <i>ENPP7</i>     | -0.358082093 |
| 10,992 | <i>TMEM7</i>     | -0.357563959 |
| 10,993 | <i>EIF2C4</i>    | -0.357466175 |
| 10,994 | <i>ZDHHC3</i>    | -0.357460721 |
| 10,995 | <i>C10ORF78</i>  | -0.357225221 |
| 10,996 | <i>LRRK2</i>     | -0.357220961 |
| 10,997 | <i>DDX1</i>      | -0.357055793 |
| 10,998 | <i>GPR139</i>    | -0.35684627  |
| 10,999 | <i>KLK10</i>     | -0.35652534  |
| 11,000 | <i>USP50</i>     | -0.356455875 |
| 11,001 | <i>HIST2H2BE</i> | -0.356195145 |
| 11,002 | <i>RHCG</i>      | -0.356078338 |
| 11,003 | <i>STX5A</i>     | -0.355827264 |
| 11,004 | <i>SRA1</i>      | -0.355728581 |
| 11,005 | <i>BICD1</i>     | -0.355726034 |
| 11,006 | <i>GPR37</i>     | -0.35562362  |
| 11,007 | <i>FLJ38944</i>  | -0.355453253 |
| 11,008 | <i>TCN1</i>      | -0.355405569 |
| 11,009 | <i>NFKBIZ</i>    | -0.35539447  |
| 11,010 | <i>EPB49</i>     | -0.355316276 |
| 11,011 | <i>RTTN</i>      | -0.355101258 |
| 11,012 | <i>SNAP91</i>    | -0.354874912 |
| 11,013 | <i>USMG5</i>     | -0.354644315 |
| 11,014 | <i>UBE2S</i>     | -0.354559341 |
| 11,015 | <i>SDAD1</i>     | -0.354533354 |
| 11,016 | <i>NRGN</i>      | -0.354396257 |
| 11,017 | <i>USP16</i>     | -0.354242969 |
| 11,018 | <i>GPR2</i>      | -0.354147785 |
| 11,019 | <i>HPS4</i>      | -0.353717178 |
| 11,020 | <i>TMED3</i>     | -0.353384137 |
| 11,021 | <i>FLJ22624</i>  | -0.353363822 |
| 11,022 | <i>PPAPDC2</i>   | -0.353105531 |
| 11,023 | <i>SLC25A22</i>  | -0.352992512 |
| 11,024 | <i>FLJ23356</i>  | -0.352843934 |
| 11,025 | <i>ARID5A</i>    | -0.352643497 |
| 11,026 | <i>GOSR2</i>     | -0.352221692 |
| 11,027 | <i>BMPR1A</i>    | -0.352151846 |
| 11,028 | <i>LOC401429</i> | -0.351972398 |
| 11,029 | <i>PLXDC1</i>    | -0.351943512 |
| 11,030 | <i>OR6C2</i>     | -0.351698303 |
| 11,031 | <i>NR5A2</i>     | -0.35157541  |
| 11,032 | <i>FLJ31300</i>  | -0.351285965 |
| 11,033 | <i>RAB43</i>     | -0.35123148  |
| 11,034 | <i>CDC2L1</i>    | -0.351080708 |
| 11,035 | <i>TUBD1</i>     | -0.350354489 |
| 11,036 | <i>GAGE2</i>     | -0.350009089 |

|        |           |              |
|--------|-----------|--------------|
| 11,037 | KIAA1847  | -0.3499932   |
| 11,038 | SOST      | -0.349990568 |
| 11,039 | KRTAP25-1 | -0.349546861 |
| 11,040 | PROK2     | -0.349469422 |
| 11,041 | ATP5S     | -0.349393328 |
| 11,042 | FLJ12525  | -0.349002277 |
| 11,043 | FLJ20522  | -0.348837263 |
| 11,044 | ELA3A     | -0.348835996 |
| 11,045 | DIABLO    | -0.348270119 |
| 11,046 | GAD2      | -0.348123273 |
| 11,047 | PIP5K1B   | -0.347924052 |
| 11,048 | SLC38A5   | -0.347903772 |
| 11,049 | NME4      | -0.347391768 |
| 11,050 | LEMD3     | -0.347337876 |
| 11,051 | PGM1      | -0.347283131 |
| 11,052 | HSPA9B    | -0.346885156 |
| 11,053 | IGF1      | -0.346828514 |
| 11,054 | NHLH1     | -0.346740634 |
| 11,055 | NMNAT2    | -0.346717603 |
| 11,056 | INADL     | -0.346551848 |
| 11,057 | IRX6      | -0.346489526 |
| 11,058 | KRTAP5-2  | -0.346403878 |
| 11,059 | ASCL3     | -0.346391099 |
| 11,060 | PRM1      | -0.34637827  |
| 11,061 | HOXB4     | -0.346124319 |
| 11,062 | KIAA1724  | -0.346054654 |
| 11,063 | TTL       | -0.346027228 |
| 11,064 | BRF2      | -0.346022274 |
| 11,065 | ZNF313    | -0.345995394 |
| 11,066 | ABR       | -0.345845551 |
| 11,067 | AIPL1     | -0.345742504 |
| 11,068 | RTBDN     | -0.345656175 |
| 11,069 | EAT2      | -0.345633198 |
| 11,070 | AKR1C1    | -0.345599095 |
| 11,071 | DDX28     | -0.345586718 |
| 11,072 | SETDB1    | -0.345238523 |
| 11,073 | POLR2D    | -0.345238365 |
| 11,074 | GPR37L1   | -0.3450468   |
| 11,075 | CTL2      | -0.344685631 |
| 11,076 | CLDN15    | -0.344559556 |
| 11,077 | GLB1L     | -0.344532534 |
| 11,078 | SULT4A1   | -0.34452304  |
| 11,079 | CADPS2    | -0.344296682 |
| 11,080 | LRAP      | -0.344224474 |
| 11,081 | GNPTAG    | -0.343705319 |
| 11,082 | TGFBR3    | -0.343601833 |
| 11,083 | CNGB1     | -0.343550053 |

|        |                  |              |
|--------|------------------|--------------|
| 11,084 | <i>RNF122</i>    | -0.343126708 |
| 11,085 | <i>TRIM40</i>    | -0.343125612 |
| 11,086 | <i>PHF20L1</i>   | -0.342807965 |
| 11,087 | <i>FLJ11036</i>  | -0.342781938 |
| 11,088 | <i>LAMA4</i>     | -0.342712492 |
| 11,089 | <i>ZNF583</i>    | -0.342571949 |
| 11,090 | <i>T2BP</i>      | -0.342242016 |
| 11,091 | <i>SYTL2</i>     | -0.342090093 |
| 11,092 | <i>HSD3B2</i>    | -0.341946256 |
| 11,093 | <i>GPC4</i>      | -0.341735245 |
| 11,094 | <i>FLJ11730</i>  | -0.34158366  |
| 11,095 | <i>ATG9B</i>     | -0.341556257 |
| 11,096 | <i>NPC1</i>      | -0.341195488 |
| 11,097 | <i>LOC400757</i> | -0.341156989 |
| 11,098 | <i>PPBP</i>      | -0.34109411  |
| 11,099 | <i>HERC4</i>     | -0.340458156 |
| 11,100 | <i>MGC50853</i>  | -0.340077335 |
| 11,101 | <i>LOC113730</i> | -0.339961407 |
| 11,102 | <i>SENP8</i>     | -0.339524646 |
| 11,103 | <i>FLJ13305</i>  | -0.33947888  |
| 11,104 | <i>AMHR2</i>     | -0.339364643 |
| 11,105 | <i>USP14</i>     | -0.339329529 |
| 11,106 | <i>CGI-121</i>   | -0.338792997 |
| 11,107 | <i>MUS81</i>     | -0.338614396 |
| 11,108 | <i>PPIL3</i>     | -0.338282337 |
| 11,109 | <i>MGC61716</i>  | -0.338240693 |
| 11,110 | <i>FLJ16237</i>  | -0.338202434 |
| 11,111 | <i>SAP30L</i>    | -0.338181884 |
| 11,112 | <i>CRISP1</i>    | -0.338130686 |
| 11,113 | <i>SFRS12</i>    | -0.337955538 |
| 11,114 | <i>GRIK3</i>     | -0.337698445 |
| 11,115 | <i>CMT4B2</i>    | -0.3374715   |
| 11,116 | <i>ZIC1</i>      | -0.337400954 |
| 11,117 | <i>KIR2DL4</i>   | -0.337393187 |
| 11,118 | <i>C14ORF140</i> | -0.337387232 |
| 11,119 | <i>GK001</i>     | -0.33732371  |
| 11,120 | <i>IL3</i>       | -0.33719996  |
| 11,121 | <i>DCT</i>       | -0.337151589 |
| 11,122 | <i>BNIP2</i>     | -0.336790134 |
| 11,123 | <i>OR8K5</i>     | -0.336764173 |
| 11,124 | <i>PPM1E</i>     | -0.336608002 |
| 11,125 | <i>PSORS1C1</i>  | -0.336496681 |
| 11,126 | <i>BUCS1</i>     | -0.336363931 |
| 11,127 | <i>RPL41</i>     | -0.336331032 |
| 11,128 | <i>BTLA</i>      | -0.336331032 |
| 11,129 | <i>PRB3</i>      | -0.336214905 |
| 11,130 | <i>SLC25A29</i>  | -0.336142018 |

|        |                  |              |
|--------|------------------|--------------|
| 11,131 | <i>FLJ46079</i>  | -0.335912473 |
| 11,132 | <i>C1ORF16</i>   | -0.335805667 |
| 11,133 | <i>UNQ429</i>    | -0.335599244 |
| 11,134 | <i>JAK3</i>      | -0.335461864 |
| 11,135 | <i>C10ORF49</i>  | -0.334911611 |
| 11,136 | <i>SH2D2A</i>    | -0.334642875 |
| 11,137 | <i>CSRP3</i>     | -0.33446509  |
| 11,138 | <i>OSBPL3</i>    | -0.334372091 |
| 11,139 | <i>SIAH1</i>     | -0.334220489 |
| 11,140 | <i>FN3K</i>      | -0.333729463 |
| 11,141 | <i>DDC</i>       | -0.333678535 |
| 11,142 | <i>DNAJC5</i>    | -0.333416691 |
| 11,143 | <i>ZDHHC13</i>   | -0.333208998 |
| 11,144 | <i>UBE2V2</i>    | -0.33319391  |
| 11,145 | <i>HTPAP</i>     | -0.332961947 |
| 11,146 | <i>OR52B6</i>    | -0.332881126 |
| 11,147 | <i>KIAA0446</i>  | -0.3328462   |
| 11,148 | <i>PCDHAC2</i>   | -0.33284531  |
| 11,149 | <i>RAP1GDS1</i>  | -0.332253582 |
| 11,150 | <i>FLJ22794</i>  | -0.331940056 |
| 11,151 | <i>RHO</i>       | -0.331460877 |
| 11,152 | <i>SLC35D1</i>   | -0.331376243 |
| 11,153 | <i>ZCWPW1</i>    | -0.331220961 |
| 11,154 | <i>FPRL1</i>     | -0.331217488 |
| 11,155 | <i>FLJ44968</i>  | -0.331024165 |
| 11,156 | <i>LOC374654</i> | -0.331013478 |
| 11,157 | <i>ABCC10</i>    | -0.330990863 |
| 11,158 | <i>CYP11B1</i>   | -0.330914749 |
| 11,159 | <i>UNQ9217</i>   | -0.33085677  |
| 11,160 | <i>SHCBP1</i>    | -0.330825369 |
| 11,161 | <i>DMGDH</i>     | -0.330734236 |
| 11,162 | <i>ACOX1</i>     | -0.33063792  |
| 11,163 | <i>PDGFC</i>     | -0.330536591 |
| 11,164 | <i>POLM</i>      | -0.330003359 |
| 11,165 | <i>PRDM9</i>     | -0.329977295 |
| 11,166 | <i>LOC57228</i>  | -0.329845345 |
| 11,167 | <i>RAB15</i>     | -0.329806606 |
| 11,168 | <i>DSPP</i>      | -0.329690001 |
| 11,169 | <i>ARSE</i>      | -0.329585246 |
| 11,170 | <i>MAGEE1</i>    | -0.329272248 |
| 11,171 | <i>LOC374768</i> | -0.328925002 |
| 11,172 | <i>LILRB4</i>    | -0.328824611 |
| 11,173 | <i>KIF5B</i>     | -0.328816763 |
| 11,174 | <i>RGS12</i>     | -0.328779971 |
| 11,175 | <i>KIAA1196</i>  | -0.328095836 |
| 11,176 | <i>COX6C</i>     | -0.32795881  |
| 11,177 | <i>SOCS7</i>     | -0.327908382 |

|        |                  |              |
|--------|------------------|--------------|
| 11,178 | <i>CCNB1</i>     | -0.327838072 |
| 11,179 | <i>C6orf173</i>  | -0.327789212 |
| 11,180 | <i>DMRT2</i>     | -0.327776881 |
| 11,181 | <i>FCRH1</i>     | -0.327747616 |
| 11,182 | <i>MAGEL2</i>    | -0.327022259 |
| 11,183 | <i>MLL</i>       | -0.326822457 |
| 11,184 | <i>SLC1A1</i>    | -0.326775462 |
| 11,185 | <i>C14ORF127</i> | -0.326766425 |
| 11,186 | <i>NUDT15</i>    | -0.326206668 |
| 11,187 | <i>DTR</i>       | -0.325607563 |
| 11,188 | <i>DPH2L2</i>    | -0.32538679  |
| 11,189 | <i>ETV7</i>      | -0.325312431 |
| 11,190 | <i>C13ORF7</i>   | -0.325250351 |
| 11,191 | <i>UTF1</i>      | -0.325051002 |
| 11,192 | <i>IL26</i>      | -0.324901677 |
| 11,193 | <i>XPO4</i>      | -0.324661161 |
| 11,194 | <i>NEU1</i>      | -0.324433509 |
| 11,195 | <i>RDH13</i>     | -0.324354174 |
| 11,196 | <i>CNIH3</i>     | -0.324315585 |
| 11,197 | <i>PCOLCE</i>    | -0.324065842 |
| 11,198 | <i>TGFB1</i>     | -0.323863953 |
| 11,199 | <i>GALNTL1</i>   | -0.323815409 |
| 11,200 | <i>ZNF23</i>     | -0.32368458  |
| 11,201 | <i>FGFR1OP2</i>  | -0.323673431 |
| 11,202 | <i>HIST1H1D</i>  | -0.32355219  |
| 11,203 | <i>FLJ35848</i>  | -0.323520059 |
| 11,204 | <i>CGI-09</i>    | -0.323336772 |
| 11,205 | <i>KIAA1040</i>  | -0.323205857 |
| 11,206 | <i>NR2F1</i>     | -0.323007739 |
| 11,207 | <i>ELOVL7</i>    | -0.32299984  |
| 11,208 | <i>ZNF257</i>    | -0.322869836 |
| 11,209 | <i>76P</i>       | -0.322832796 |
| 11,210 | <i>CLDN8</i>     | -0.322737544 |
| 11,211 | <i>TNFRSF19</i>  | -0.322726218 |
| 11,212 | <i>ATF5</i>      | -0.322672902 |
| 11,213 | <i>KCNK2</i>     | -0.322513718 |
| 11,214 | <i>FLJ25476</i>  | -0.322414604 |
| 11,215 | <i>FLJ37396</i>  | -0.322250719 |
| 11,216 | <i>CACNG1</i>    | -0.322226566 |
| 11,217 | <i>FLJ11004</i>  | -0.321915114 |
| 11,218 | <i>PTX3</i>      | -0.321859789 |
| 11,219 | <i>C22ORF23</i>  | -0.321859789 |
| 11,220 | <i>ABP1</i>      | -0.321734992 |
| 11,221 | <i>NFIX</i>      | -0.321591745 |
| 11,222 | <i>ZDHHC19</i>   | -0.321325675 |
| 11,223 | <i>FLJ22457</i>  | -0.321151018 |
| 11,224 | <i>SIX4</i>      | -0.321045103 |

|        |                  |              |
|--------|------------------|--------------|
| 11,225 | <i>UNC84A</i>    | -0.320885763 |
| 11,226 | <i>CRSP3</i>     | -0.32056808  |
| 11,227 | <i>GCNT3</i>     | -0.320427206 |
| 11,228 | <i>PSPH</i>      | -0.320296352 |
| 11,229 | <i>CDCA4</i>     | -0.320259769 |
| 11,230 | <i>SARA1</i>     | -0.320113054 |
| 11,231 | <i>FLJ22578</i>  | -0.320055328 |
| 11,232 | <i>KIAA1393</i>  | -0.320050128 |
| 11,233 | <i>SLC5A7</i>    | -0.319954932 |
| 11,234 | <i>UBE2Z</i>     | -0.319947342 |
| 11,235 | <i>CPD</i>       | -0.319922918 |
| 11,236 | <i>PTPMT1</i>    | -0.319744131 |
| 11,237 | <i>ARHGEF1</i>   | -0.31960466  |
| 11,238 | <i>LRRTM3</i>    | -0.31946262  |
| 11,239 | <i>JJAZ1</i>     | -0.319395172 |
| 11,240 | <i>CLCNKA</i>    | -0.319112098 |
| 11,241 | <i>SWAP70</i>    | -0.318969311 |
| 11,242 | <i>HRSP12</i>    | -0.318652888 |
| 11,243 | <i>KIAA1344</i>  | -0.318630198 |
| 11,244 | <i>C20ORF99</i>  | -0.318521786 |
| 11,245 | <i>FLJ21657</i>  | -0.318485684 |
| 11,246 | <i>ZNF593</i>    | -0.318099924 |
| 11,247 | <i>HBA1</i>      | -0.318021509 |
| 11,248 | <i>PLA2G4B</i>   | -0.317997309 |
| 11,249 | <i>ZNF169</i>    | -0.31783596  |
| 11,250 | <i>PCNT</i>      | -0.317784528 |
| 11,251 | <i>SLC2A4RG</i>  | -0.317771623 |
| 11,252 | <i>LOC646627</i> | -0.317668066 |
| 11,253 | <i>ZW10</i>      | -0.317475272 |
| 11,254 | <i>FKBP3</i>     | -0.317439438 |
| 11,255 | <i>C10ORF80</i>  | -0.31736144  |
| 11,256 | <i>LOC120824</i> | -0.317225696 |
| 11,257 | <i>FXD1</i>      | -0.316915428 |
| 11,258 | <i>SDHC</i>      | -0.316727862 |
| 11,259 | <i>BTN3A2</i>    | -0.316528394 |
| 11,260 | <i>PSTPIP2</i>   | -0.316330329 |
| 11,261 | <i>CXCR3</i>     | -0.315463256 |
| 11,262 | <i>CDKL5</i>     | -0.315383722 |
| 11,263 | <i>VARS2L</i>    | -0.315310433 |
| 11,264 | <i>HT011</i>     | -0.315257574 |
| 11,265 | <i>FLJ44186</i>  | -0.315091817 |
| 11,266 | <i>OTC</i>       | -0.314910175 |
| 11,267 | <i>LOC404636</i> | -0.314677799 |
| 11,268 | <i>ETFDH</i>     | -0.314453805 |
| 11,269 | <i>MITF</i>      | -0.314441845 |
| 11,270 | <i>NEDD4</i>     | -0.31439233  |
| 11,271 | <i>PDE4D</i>     | -0.313739384 |



|        |                  |              |
|--------|------------------|--------------|
| 11,272 | <i>LOC339123</i> | -0.313398215 |
| 11,273 | <i>MCM5</i>      | -0.3133511   |
| 11,274 | <i>RGS16</i>     | -0.313292925 |
| 11,275 | <i>CBX6</i>      | -0.313224765 |
| 11,276 | <i>EBAG9</i>     | -0.313043352 |
| 11,277 | <i>G3BP</i>      | -0.312636413 |
| 11,278 | <i>KCNV1</i>     | -0.312522087 |
| 11,279 | <i>ATP5J</i>     | -0.312371074 |
| 11,280 | <i>AKAP11</i>    | -0.31227952  |
| 11,281 | <i>GATA1</i>     | -0.312086594 |
| 11,282 | <i>LOC348158</i> | -0.311784067 |
| 11,283 | <i>ABI2</i>      | -0.311673201 |
| 11,284 | <i>SRPRB</i>     | -0.31140595  |
| 11,285 | <i>MBD3L1</i>    | -0.311142465 |
| 11,286 | <i>LMNB2</i>     | -0.311091135 |
| 11,287 | <i>HIST1H2BI</i> | -0.310989564 |
| 11,288 | <i>FLJ25006</i>  | -0.310891118 |
| 11,289 | <i>NMNAT3</i>    | -0.31071268  |
| 11,290 | <i>MC2R</i>      | -0.310627548 |
| 11,291 | <i>FLJ39155</i>  | -0.310600025 |
| 11,292 | <i>CDH6</i>      | -0.310488661 |
| 11,293 | <i>HCCS</i>      | -0.31044826  |
| 11,294 | <i>SLC35F5</i>   | -0.310290774 |
| 11,295 | <i>FABP5</i>     | -0.309898013 |
| 11,296 | <i>HIPK3</i>     | -0.309632434 |
| 11,297 | <i>SNRPG</i>     | -0.308952999 |
| 11,298 | <i>LOC348174</i> | -0.308780415 |
| 11,299 | <i>F8A2</i>      | -0.308587414 |
| 11,300 | <i>PDK3</i>      | -0.308399727 |
| 11,301 | <i>MRO</i>       | -0.308359579 |
| 11,302 | <i>UGT2B17</i>   | -0.30829234  |
| 11,303 | <i>TRIB1</i>     | -0.308224408 |
| 11,304 | <i>CLIC1</i>     | -0.308216715 |
| 11,305 | <i>AKT3</i>      | -0.308103331 |
| 11,306 | <i>LOC651503</i> | -0.308080247 |
| 11,307 | <i>MAK3</i>      | -0.307939023 |
| 11,308 | <i>C14ORF6</i>   | -0.307653292 |
| 11,309 | <i>PPAP2C</i>    | -0.307559567 |
| 11,310 | <i>KIAA0980</i>  | -0.307458184 |
| 11,311 | <i>VCPIP1</i>    | -0.307435623 |
| 11,312 | <i>FOXK2</i>     | -0.307385414 |
| 11,313 | <i>MMP7</i>      | -0.307208242 |
| 11,314 | <i>NY-SAR-41</i> | -0.306935688 |
| 11,315 | <i>MGAT4B</i>    | -0.306852844 |
| 11,316 | <i>HSD3B7</i>    | -0.306675909 |
| 11,317 | <i>LRRIQ1</i>    | -0.306520958 |
| 11,318 | <i>TRH</i>       | -0.306453516 |

|        |                  |              |
|--------|------------------|--------------|
| 11,319 | <i>OR4C45</i>    | -0.306042005 |
| 11,320 | <i>EPX</i>       | -0.305999841 |
| 11,321 | <i>MGC10911</i>  | -0.305991988 |
| 11,322 | <i>PEX12</i>     | -0.305825322 |
| 11,323 | <i>EPST11</i>    | -0.305796918 |
| 11,324 | <i>PAF53</i>     | -0.305659388 |
| 11,325 | <i>LRRK1</i>     | -0.305632003 |
| 11,326 | <i>MAP2K3</i>    | -0.305583968 |
| 11,327 | <i>KRTAP6-3</i>  | -0.30553695  |
| 11,328 | <i>FLJ13063</i>  | -0.30539866  |
| 11,329 | <i>CLN3</i>      | -0.30530711  |
| 11,330 | <i>PILRA</i>     | -0.305121062 |
| 11,331 | <i>NDUFA7</i>    | -0.305039418 |
| 11,332 | <i>GNMT</i>      | -0.304852507 |
| 11,333 | <i>SNAI3</i>     | -0.304559336 |
| 11,334 | <i>PIP5K1C</i>   | -0.30440992  |
| 11,335 | <i>ACTR6</i>     | -0.304293945 |
| 11,336 | <i>WBP4</i>      | -0.303729473 |
| 11,337 | <i>GRIN3B</i>    | -0.303460823 |
| 11,338 | <i>FNDC1</i>     | -0.303436061 |
| 11,339 | <i>AIM1L</i>     | -0.3029666   |
| 11,340 | <i>PMPCA</i>     | -0.302829513 |
| 11,341 | <i>TATDN1</i>    | -0.302679762 |
| 11,342 | <i>HMOX1</i>     | -0.302574332 |
| 11,343 | <i>EXOSC5</i>    | -0.302411684 |
| 11,344 | <i>IGFBP3</i>    | -0.302330936 |
| 11,345 | <i>NCLN</i>      | -0.302218405 |
| 11,346 | <i>ASAH1</i>     | -0.301233983 |
| 11,347 | <i>CYS1</i>      | -0.30088971  |
| 11,348 | <i>BCAS2</i>     | -0.300836966 |
| 11,349 | <i>RBM24</i>     | -0.300759336 |
| 11,350 | <i>LOC388722</i> | -0.300588908 |
| 11,351 | <i>ZP2</i>       | -0.300418206 |
| 11,352 | <i>ZNF645</i>    | -0.300415162 |
| 11,353 | <i>ID1</i>       | -0.299929991 |
| 11,354 | <i>MGC12466</i>  | -0.299843297 |
| 11,355 | <i>CLK3</i>      | -0.299736548 |
| 11,356 | <i>PLAC9</i>     | -0.299730323 |
| 11,357 | <i>LOC257106</i> | -0.29960799  |
| 11,358 | <i>HBXIP</i>     | -0.299590891 |
| 11,359 | <i>C21ORF56</i>  | -0.299536219 |
| 11,360 | <i>PCDH20</i>    | -0.299257475 |
| 11,361 | <i>TUB</i>       | -0.299240117 |
| 11,362 | <i>CCM2</i>      | -0.299208849 |
| 11,363 | <i>CBR1</i>      | -0.29895184  |
| 11,364 | <i>ZIC4</i>      | -0.298951221 |
| 11,365 | <i>COPS6</i>     | -0.29880026  |

|        |                      |              |
|--------|----------------------|--------------|
| 11,366 | <i>KRT7</i>          | -0.298584421 |
| 11,367 | <i>LRP8</i>          | -0.298416456 |
| 11,368 | <i>FLJ38190</i>      | -0.29824396  |
| 11,369 | <i>AMACR</i>         | -0.298122044 |
| 11,370 | <i>GPR32</i>         | -0.297943054 |
| 11,371 | <i>SMOX</i>          | -0.297694965 |
| 11,372 | <i>AXUD1</i>         | -0.297635826 |
| 11,373 | <i>TCFL4</i>         | -0.297385862 |
| 11,374 | <i>WISP1</i>         | -0.297105941 |
| 11,375 | <i>RAB7L1</i>        | -0.296945088 |
| 11,376 | <i>COX15</i>         | -0.296888971 |
| 11,377 | <i>IFITM1</i>        | -0.296538939 |
| 11,378 | <i>MRPL47</i>        | -0.296425158 |
| 11,379 | <i>MTF1</i>          | -0.296415985 |
| 11,380 | <i>KIAA0258</i>      | -0.296179114 |
| 11,381 | <i>COH1</i>          | -0.295829396 |
| 11,382 | <i>PDF</i>           | -0.295718783 |
| 11,383 | <i>FXD2</i>          | -0.295497894 |
| 11,384 | <i>RAB6A</i>         | -0.295346276 |
| 11,385 | <i>PLTP</i>          | -0.295278727 |
| 11,386 | <i>GNAS</i>          | -0.295040596 |
| 11,387 | <i>MGC13024</i>      | -0.295034818 |
| 11,388 | <i>TLX3</i>          | -0.295009543 |
| 11,389 | <i>RAET1G</i>        | -0.294895435 |
| 11,390 | <i>CRYZ</i>          | -0.29488171  |
| 11,391 | <i>MGC14327</i>      | -0.29457886  |
| 11,392 | <i>LOC388650</i>     | -0.294461168 |
| 11,393 | <i>PRKCL2</i>        | -0.294362205 |
| 11,394 | <i>SPACA5B</i>       | -0.294356872 |
| 11,395 | <i>GPR7</i>          | -0.294215129 |
| 11,396 | <i>FLJ20716</i>      | -0.294193663 |
| 11,397 | <i>BOLA2</i>         | -0.29381146  |
| 11,398 | <i>KIAA1755</i>      | -0.293480173 |
| 11,399 | <i>DKFZP434G0625</i> | -0.293348283 |
| 11,400 | <i>HIST1H4K</i>      | -0.293001025 |
| 11,401 | <i>CALCR</i>         | -0.29278448  |
| 11,402 | <i>C7ORF34</i>       | -0.29243195  |
| 11,403 | <i>PRM2</i>          | -0.292380792 |
| 11,404 | <i>HOXC12</i>        | -0.292363633 |
| 11,405 | <i>ZNRF4</i>         | -0.292148532 |
| 11,406 | <i>PLEKHC1</i>       | -0.292051193 |
| 11,407 | <i>IL3RA</i>         | -0.291932374 |
| 11,408 | <i>BMP8A</i>         | -0.291907984 |
| 11,409 | <i>ZNF410</i>        | -0.29165567  |
| 11,410 | <i>MCL1</i>          | -0.291567206 |
| 11,411 | <i>SPATS1</i>        | -0.29153219  |
| 11,412 | <i>DKFZP564D172</i>  | -0.291397092 |

|        |                  |              |
|--------|------------------|--------------|
| 11,413 | <i>MGC24047</i>  | -0.291127841 |
| 11,414 | <i>AQP4</i>      | -0.291090121 |
| 11,415 | <i>KLRA1</i>     | -0.29100174  |
| 11,416 | <i>MRPS18C</i>   | -0.290180168 |
| 11,417 | <i>SUV420H2</i>  | -0.29003655  |
| 11,418 | <i>C17ORF35</i>  | -0.289707394 |
| 11,419 | <i>SPINK4</i>    | -0.289559769 |
| 11,420 | <i>ZNF26</i>     | -0.289504375 |
| 11,421 | <i>OSBPL2</i>    | -0.289472498 |
| 11,422 | <i>ZNF621</i>    | -0.28901411  |
| 11,423 | <i>TLR8</i>      | -0.288228466 |
| 11,424 | <i>SFRS6</i>     | -0.288166078 |
| 11,425 | <i>PTPN1</i>     | -0.288144542 |
| 11,426 | <i>RAP80</i>     | -0.288034286 |
| 11,427 | <i>FLJ22624</i>  | -0.288008763 |
| 11,428 | <i>NDUFS5</i>    | -0.287803097 |
| 11,429 | <i>FHL3</i>      | -0.287540628 |
| 11,430 | <i>OR1L8</i>     | -0.287496322 |
| 11,431 | <i>MGC4368</i>   | -0.287313166 |
| 11,432 | <i>RSHL2</i>     | -0.287290559 |
| 11,433 | <i>NOLC1</i>     | -0.287170409 |
| 11,434 | <i>FHIT</i>      | -0.286921678 |
| 11,435 | <i>RFC5</i>      | -0.286766725 |
| 11,436 | <i>ANAPC10</i>   | -0.286700887 |
| 11,437 | <i>NUDT12</i>    | -0.286662479 |
| 11,438 | <i>MGC12458</i>  | -0.286562232 |
| 11,439 | <i>AMPH</i>      | -0.286550911 |
| 11,440 | <i>PRKG2</i>     | -0.286077294 |
| 11,441 | <i>RNF139</i>    | -0.286053447 |
| 11,442 | <i>ZCCHC6</i>    | -0.285296859 |
| 11,443 | <i>FLJ35821</i>  | -0.284775219 |
| 11,444 | <i>SLCO4A1</i>   | -0.284754475 |
| 11,445 | <i>UBE1L2</i>    | -0.28475067  |
| 11,446 | <i>ZNF187</i>    | -0.284453628 |
| 11,447 | <i>MGC5601</i>   | -0.284349791 |
| 11,448 | <i>DDAH1</i>     | -0.284267175 |
| 11,449 | <i>UBE4A</i>     | -0.284114102 |
| 11,450 | <i>OR10H5</i>    | -0.283939258 |
| 11,451 | <i>RHOBTB1</i>   | -0.283783012 |
| 11,452 | <i>HTR3E</i>     | -0.283684973 |
| 11,453 | <i>MGC15606</i>  | -0.283581461 |
| 11,454 | <i>MECP2</i>     | -0.283566112 |
| 11,455 | <i>LOC283385</i> | -0.283336235 |
| 11,456 | <i>FLJ40773</i>  | -0.283111114 |
| 11,457 | <i>FLJ13231</i>  | -0.283044702 |
| 11,458 | <i>SPACA4</i>    | -0.282827017 |
| 11,459 | <i>MGC2603</i>   | -0.282807857 |

|        |                      |              |
|--------|----------------------|--------------|
| 11,460 | <i>MGC34728</i>      | -0.282807857 |
| 11,461 | <i>RNF6</i>          | -0.282728855 |
| 11,462 | <i>LOC151194</i>     | -0.282493213 |
| 11,463 | <i>TBC1D10</i>       | -0.282322474 |
| 11,464 | <i>MYBL1</i>         | -0.282129334 |
| 11,465 | <i>STK24</i>         | -0.28170165  |
| 11,466 | <i>IPMK</i>          | -0.281413143 |
| 11,467 | <i>KIAA0423</i>      | -0.281346196 |
| 11,468 | <i>DKKL1-PENDING</i> | -0.281096537 |
| 11,469 | <i>CRTAP</i>         | -0.28091237  |
| 11,470 | <i>KLC2</i>          | -0.280748894 |
| 11,471 | <i>TNFSF5</i>        | -0.280727221 |
| 11,472 | <i>DPP10</i>         | -0.280498271 |
| 11,473 | <i>DPCD</i>          | -0.280495537 |
| 11,474 | <i>OSBPL6</i>        | -0.280251691 |
| 11,475 | <i>STAC2</i>         | -0.280246822 |
| 11,476 | <i>TM7SF4</i>        | -0.280246822 |
| 11,477 | <i>CCL28</i>         | -0.280218381 |
| 11,478 | <i>GNPAT</i>         | -0.279942164 |
| 11,479 | <i>ZRF1</i>          | -0.279815992 |
| 11,480 | <i>CHSY1</i>         | -0.279776281 |
| 11,481 | <i>MED6</i>          | -0.279639615 |
| 11,482 | <i>BNC1</i>          | -0.279480126 |
| 11,483 | <i>TMSL3</i>         | -0.279378172 |
| 11,484 | <i>FAM40A</i>        | -0.279320004 |
| 11,485 | <i>MGC33371</i>      | -0.279308511 |
| 11,486 | <i>JTV1</i>          | -0.279224673 |
| 11,487 | <i>PRO2730</i>       | -0.279205832 |
| 11,488 | <i>TFF1</i>          | -0.279140625 |
| 11,489 | <i>MKNK2</i>         | -0.279136458 |
| 11,490 | <i>FANCB</i>         | -0.278781732 |
| 11,491 | <i>ST7</i>           | -0.278677473 |
| 11,492 | <i>KIAA0232</i>      | -0.27861226  |
| 11,493 | <i>GR6</i>           | -0.278540484 |
| 11,494 | <i>PIGW</i>          | -0.278379487 |
| 11,495 | <i>PPP1R16B</i>      | -0.278066514 |
| 11,496 | <i>MMP1</i>          | -0.277783547 |
| 11,497 | <i>GPR20</i>         | -0.277214602 |
| 11,498 | <i>GRHPR</i>         | -0.276393273 |
| 11,499 | <i>HSD17B7</i>       | -0.276298879 |
| 11,500 | <i>DDHD2</i>         | -0.27617029  |
| 11,501 | <i>PRKCBP1</i>       | -0.27589985  |
| 11,502 | <i>PDPK1</i>         | -0.275581545 |
| 11,503 | <i>SLC35A3</i>       | -0.27538829  |
| 11,504 | <i>C10ORF53</i>      | -0.274697407 |
| 11,505 | <i>NSBP1</i>         | -0.274534341 |
| 11,506 | <i>HSA9947</i>       | -0.274417879 |

|        |              |              |
|--------|--------------|--------------|
| 11,507 | ZCCHC10      | -0.274286463 |
| 11,508 | IGFBP2       | -0.274286463 |
| 11,509 | GARNL4       | -0.274206604 |
| 11,510 | CRYBA1       | -0.274148443 |
| 11,511 | FLJ33817     | -0.273831063 |
| 11,512 | PAQR3        | -0.273551536 |
| 11,513 | MUC4         | -0.273299995 |
| 11,514 | YIPF5        | -0.273142297 |
| 11,515 | RBM4         | -0.272813734 |
| 11,516 | HAVCR2       | -0.272804373 |
| 11,517 | THAP6        | -0.272801526 |
| 11,518 | LOC129531    | -0.272634164 |
| 11,519 | SCGB1D1      | -0.27253759  |
| 11,520 | NYD-SP18     | -0.272520186 |
| 11,521 | GNB3         | -0.272306244 |
| 11,522 | VCY1B        | -0.272244447 |
| 11,523 | MFI2         | -0.272212911 |
| 11,524 | STRN         | -0.271999643 |
| 11,525 | HIP2         | -0.271661466 |
| 11,526 | DDX52        | -0.271623354 |
| 11,527 | ARFIP2       | -0.271511899 |
| 11,528 | LOC390110    | -0.271493826 |
| 11,529 | ATP1B1       | -0.271400841 |
| 11,530 | FLJ12650     | -0.271150929 |
| 11,531 | CXORF53      | -0.271117399 |
| 11,532 | PELP1        | -0.270999239 |
| 11,533 | C14orf174    | -0.270627936 |
| 11,534 | FBXO31       | -0.270561923 |
| 11,535 | SEC8L1       | -0.270194808 |
| 11,536 | FLJ37538     | -0.270109341 |
| 11,537 | LOC347527    | -0.270082114 |
| 11,538 | SLC10A2      | -0.269075604 |
| 11,539 | DDO          | -0.268796881 |
| 11,540 | LOC283337    | -0.268794065 |
| 11,541 | C14ORF169    | -0.268700702 |
| 11,542 | ZNF493       | -0.268504191 |
| 11,543 | RAD23A       | -0.268448435 |
| 11,544 | DKFZP761A078 | -0.268275973 |
| 11,545 | DPT          | -0.268021741 |
| 11,546 | XKRY         | -0.267892907 |
| 11,547 | C2ORF22      | -0.267724706 |
| 11,548 | CD300LG      | -0.267588247 |
| 11,549 | KCNAB2       | -0.267508349 |
| 11,550 | OR6Q1        | -0.267149753 |
| 11,551 | C21ORF57     | -0.266964733 |
| 11,552 | LOC441027    | -0.26652472  |
| 11,553 | TRPC7        | -0.266392015 |

|        |                  |              |
|--------|------------------|--------------|
| 11,554 | <i>FLJ20035</i>  | -0.266074305 |
| 11,555 | <i>ZNF294</i>    | -0.266041605 |
| 11,556 | <i>OR2B6</i>     | -0.265992376 |
| 11,557 | <i>TAS2R39</i>   | -0.265625244 |
| 11,558 | <i>NUTF2</i>     | -0.265117796 |
| 11,559 | <i>FLJ14668</i>  | -0.264868039 |
| 11,560 | <i>ACVRL1</i>    | -0.264821069 |
| 11,561 | <i>FLJ20399</i>  | -0.264694149 |
| 11,562 | <i>TXNL4</i>     | -0.264558536 |
| 11,563 | <i>LOC283431</i> | -0.26442237  |
| 11,564 | <i>FLJ30655</i>  | -0.264254926 |
| 11,565 | <i>OR4D2</i>     | -0.264050278 |
| 11,566 | <i>B3GALT2</i>   | -0.263899214 |
| 11,567 | <i>WFDC11</i>    | -0.263840592 |
| 11,568 | <i>DNAJB1</i>    | -0.263552604 |
| 11,569 | <i>CCL21</i>     | -0.263547618 |
| 11,570 | <i>OR10Z1</i>    | -0.263523442 |
| 11,571 | <i>NNMT</i>      | -0.262965742 |
| 11,572 | <i>KIAA1712</i>  | -0.262891076 |
| 11,573 | <i>COMMD1</i>    | -0.26269778  |
| 11,574 | <i>OR13C4</i>    | -0.262676859 |
| 11,575 | <i>USH2A</i>     | -0.262336065 |
| 11,576 | <i>LOC90736</i>  | -0.262228851 |
| 11,577 | <i>NOTCH1</i>    | -0.262032981 |
| 11,578 | <i>ODF1</i>      | -0.262027288 |
| 11,579 | <i>ABCB4</i>     | -0.261902766 |
| 11,580 | <i>MGC50722</i>  | -0.261883893 |
| 11,581 | <i>GALNTL2</i>   | -0.261827226 |
| 11,582 | <i>MTB</i>       | -0.261724433 |
| 11,583 | <i>ACSL5</i>     | -0.261347007 |
| 11,584 | <i>MGA</i>       | -0.261268183 |
| 11,585 | <i>FLJ13710</i>  | -0.261065796 |
| 11,586 | <i>DSCR10</i>    | -0.260823381 |
| 11,587 | <i>CRSP6</i>     | -0.260469842 |
| 11,588 | <i>BPY2B</i>     | -0.259955683 |
| 11,589 | <i>LSM4</i>      | -0.259906241 |
| 11,590 | <i>AGTR1</i>     | -0.259904297 |
| 11,591 | <i>CHRNA3</i>    | -0.259008767 |
| 11,592 | <i>ABCC2</i>     | -0.258989257 |
| 11,593 | <i>SLCO1A2</i>   | -0.258952556 |
| 11,594 | <i>GPR48</i>     | -0.258930738 |
| 11,595 | <i>MGC33329</i>  | -0.258498962 |
| 11,596 | <i>IFNB1</i>     | -0.258475934 |
| 11,597 | <i>CRIP2</i>     | -0.258433007 |
| 11,598 | <i>ADAM29</i>    | -0.258383395 |
| 11,599 | <i>ARID3A</i>    | -0.2582914   |
| 11,600 | <i>PCSK7</i>     | -0.258262239 |

|        |              |              |
|--------|--------------|--------------|
| 11,601 | SCGN         | -0.258038117 |
| 11,602 | HFE2         | -0.257934052 |
| 11,603 | ZNF547       | -0.257521451 |
| 11,604 | CDC42BPB     | -0.256998879 |
| 11,605 | ATG7         | -0.256650788 |
| 11,606 | OR7D2        | -0.256567886 |
| 11,607 | ZFH4         | -0.256092738 |
| 11,608 | TSPAN9       | -0.256065243 |
| 11,609 | FLJ38508     | -0.255908347 |
| 11,610 | GA17         | -0.255906365 |
| 11,611 | MYOM3        | -0.255889781 |
| 11,612 | LCMT1        | -0.255670707 |
| 11,613 | TLR2         | -0.255599966 |
| 11,614 | FLJ10081     | -0.255529809 |
| 11,615 | MAMDC2       | -0.255387528 |
| 11,616 | LRP4         | -0.255282458 |
| 11,617 | RAB3-GAP150  | -0.255104948 |
| 11,618 | SPI1         | -0.254990531 |
| 11,619 | BRAF         | -0.25497136  |
| 11,620 | LOC339768    | -0.254835765 |
| 11,621 | RBMS2        | -0.254695927 |
| 11,622 | FAM32A       | -0.253964899 |
| 11,623 | KIAA0664     | -0.253825045 |
| 11,624 | MOV10L1      | -0.253658943 |
| 11,625 | LIN7B        | -0.253276283 |
| 11,626 | POTE2        | -0.253061386 |
| 11,627 | OAZ3         | -0.25240089  |
| 11,628 | CGB1         | -0.252387106 |
| 11,629 | KIAA0931     | -0.25235803  |
| 11,630 | NHLRC1       | -0.252155203 |
| 11,631 | ACRBP        | -0.252133004 |
| 11,632 | MPP3         | -0.251934069 |
| 11,633 | EHHADH       | -0.251868596 |
| 11,634 | CDC23        | -0.251854251 |
| 11,635 | CAMKIINALPHA | -0.25170864  |
| 11,636 | C9ORF116     | -0.251602307 |
| 11,637 | KCND1        | -0.251564492 |
| 11,638 | RBL1         | -0.251542123 |
| 11,639 | DKK4         | -0.251285897 |
| 11,640 | DPM1         | -0.251281206 |
| 11,641 | KIAA0555     | -0.251270281 |
| 11,642 | MGC21394     | -0.250931422 |
| 11,643 | LOC387856    | -0.250768943 |
| 11,644 | FLJ31438     | -0.250584578 |
| 11,645 | GMDS         | -0.250532941 |
| 11,646 | MYF5         | -0.25049885  |
| 11,647 | COL22A1      | -0.250451725 |



|        |                     |              |
|--------|---------------------|--------------|
| 11,648 | <i>CLDN16</i>       | -0.250212123 |
| 11,649 | <i>KCNC2</i>        | -0.250211018 |
| 11,650 | <i>BTK</i>          | -0.250176011 |
| 11,651 | <i>PCBP3</i>        | -0.250162836 |
| 11,652 | <i>SURF2</i>        | -0.250018985 |
| 11,653 | <i>SNRK</i>         | -0.249735416 |
| 11,654 | <i>IFNA6</i>        | -0.249541294 |
| 11,655 | <i>LIM2</i>         | -0.249309504 |
| 11,656 | <i>GPR61</i>        | -0.249117501 |
| 11,657 | <i>SPINLW1</i>      | -0.249054979 |
| 11,658 | <i>SNRPB</i>        | -0.249031001 |
| 11,659 | <i>FLJ10204</i>     | -0.248898492 |
| 11,660 | <i>MRPL40</i>       | -0.248875883 |
| 11,661 | <i>EYA4</i>         | -0.248750422 |
| 11,662 | <i>C6ORF205</i>     | -0.2485679   |
| 11,663 | <i>C14ORF101</i>    | -0.248539008 |
| 11,664 | <i>GUCA1B</i>       | -0.248296438 |
| 11,665 | <i>RNASEN</i>       | -0.248197809 |
| 11,666 | <i>BMPR1B</i>       | -0.248041428 |
| 11,667 | <i>M17S2</i>        | -0.247985593 |
| 11,668 | <i>PLA2G1B</i>      | -0.247883462 |
| 11,669 | <i>CEP250</i>       | -0.247860984 |
| 11,670 | <i>UTS2</i>         | -0.247448224 |
| 11,671 | <i>ROR2</i>         | -0.247342213 |
| 11,672 | <i>LOC285527</i>    | -0.247273393 |
| 11,673 | <i>PRKCZ</i>        | -0.247194015 |
| 11,674 | <i>SPAG9</i>        | -0.247181425 |
| 11,675 | <i>TIMM22</i>       | -0.246981313 |
| 11,676 | <i>GOLPH3</i>       | -0.246941363 |
| 11,677 | <i>LOC349136</i>    | -0.246519154 |
| 11,678 | <i>LOC135935</i>    | -0.24595501  |
| 11,679 | <i>BEXL1</i>        | -0.245905391 |
| 11,680 | <i>FGB</i>          | -0.245868059 |
| 11,681 | <i>ATP2B1</i>       | -0.245730278 |
| 11,682 | <i>UBE2L3</i>       | -0.245595639 |
| 11,683 | <i>DKFZP566E144</i> | -0.24516087  |
| 11,684 | <i>LOC90268</i>     | -0.245126191 |
| 11,685 | <i>CD1A</i>         | -0.245082284 |
| 11,686 | <i>KBTBD6</i>       | -0.244747042 |
| 11,687 | <i>GPS2</i>         | -0.244714052 |
| 11,688 | <i>C20ORF20</i>     | -0.244101529 |
| 11,689 | <i>OTP-NT</i>       | -0.244026409 |
| 11,690 | <i>BRAP</i>         | -0.243874583 |
| 11,691 | <i>SLC35A4</i>      | -0.24352324  |
| 11,692 | <i>CST8</i>         | -0.243503324 |
| 11,693 | <i>C10ORF57</i>     | -0.243473783 |
| 11,694 | <i>LIPT1</i>        | -0.243390191 |

|        |                     |              |
|--------|---------------------|--------------|
| 11,695 | <i>OR8S1</i>        | -0.243327227 |
| 11,696 | <i>FLJ10439</i>     | -0.243130591 |
| 11,697 | <i>UNQ1849</i>      | -0.242475464 |
| 11,698 | <i>KRTAP5-9</i>     | -0.242040025 |
| 11,699 | <i>LATS2</i>        | -0.241891099 |
| 11,700 | <i>STAB1</i>        | -0.241803662 |
| 11,701 | <i>CCDC5</i>        | -0.241646201 |
| 11,702 | <i>MEGF10</i>       | -0.241596835 |
| 11,703 | <i>WDR35</i>        | -0.241326925 |
| 11,704 | <i>VAX2</i>         | -0.241284413 |
| 11,705 | <i>C3ORF57</i>      | -0.240943058 |
| 11,706 | <i>LOC387911</i>    | -0.240585186 |
| 11,707 | <i>MGC26816</i>     | -0.240542588 |
| 11,708 | <i>ZFP106</i>       | -0.240255616 |
| 11,709 | <i>LOC92558</i>     | -0.240076773 |
| 11,710 | <i>POU5F1</i>       | -0.239944167 |
| 11,711 | <i>CORO2A</i>       | -0.239784429 |
| 11,712 | <i>NR1I2</i>        | -0.239642232 |
| 11,713 | <i>PURA</i>         | -0.239564287 |
| 11,714 | <i>NID67</i>        | -0.239396396 |
| 11,715 | <i>IER2</i>         | -0.239289775 |
| 11,716 | <i>SEMG2</i>        | -0.23922748  |
| 11,717 | <i>UPK3B</i>        | -0.238933852 |
| 11,718 | <i>DKFZP5640243</i> | -0.23871781  |
| 11,719 | <i>ODF3</i>         | -0.238620166 |
| 11,720 | <i>RRAGC</i>        | -0.238563724 |
| 11,721 | <i>SDFR1</i>        | -0.238470163 |
| 11,722 | <i>TOPORS</i>       | -0.238123911 |
| 11,723 | <i>INTS12</i>       | -0.237941558 |
| 11,724 | <i>MRPS18B</i>      | -0.237930719 |
| 11,725 | <i>PRKAR2A</i>      | -0.23785755  |
| 11,726 | <i>PIAS3</i>        | -0.237773187 |
| 11,727 | <i>LOC115811</i>    | -0.237696329 |
| 11,728 | <i>HT007</i>        | -0.237682194 |
| 11,729 | <i>OR4C16</i>       | -0.237620267 |
| 11,730 | <i>TMCO4</i>        | -0.237323607 |
| 11,731 | <i>SERPINA5</i>     | -0.237251174 |
| 11,732 | <i>C1ORF16</i>      | -0.237235475 |
| 11,733 | <i>SPG21</i>        | -0.237177228 |
| 11,734 | <i>BHLHB5</i>       | -0.237014608 |
| 11,735 | <i>SOD2</i>         | -0.236916442 |
| 11,736 | <i>H1FO</i>         | -0.236551303 |
| 11,737 | <i>WBSCR1</i>       | -0.236386974 |
| 11,738 | <i>RPL37</i>        | -0.236111342 |
| 11,739 | <i>RPL37</i>        | -0.236111342 |
| 11,740 | <i>GPR65</i>        | -0.236025233 |
| 11,741 | <i>TINP1</i>        | -0.235883811 |

|        |           |              |
|--------|-----------|--------------|
| 11,742 | ZNF396    | -0.235853139 |
| 11,743 | OR5C1     | -0.235616276 |
| 11,744 | FLJ22390  | -0.235581342 |
| 11,745 | FLJ31153  | -0.235526516 |
| 11,746 | ZNF239    | -0.235156355 |
| 11,747 | KCTD3     | -0.234332561 |
| 11,748 | ARNT      | -0.234284163 |
| 11,749 | OR6K3     | -0.23427258  |
| 11,750 | USP52     | -0.234173205 |
| 11,751 | AGPAT3    | -0.233947956 |
| 11,752 | LOC644006 | -0.233797901 |
| 11,753 | PAFAH1B3  | -0.23367739  |
| 11,754 | RAB8A     | -0.233557813 |
| 11,755 | FLJ20718  | -0.233356305 |
| 11,756 | C9ORF54   | -0.233152591 |
| 11,757 | OR51F2    | -0.232840893 |
| 11,758 | NR4A2     | -0.232708482 |
| 11,759 | TNFSF15   | -0.232529765 |
| 11,760 | THEDC1    | -0.232450943 |
| 11,761 | IL8RA     | -0.232407836 |
| 11,762 | LEMD1     | -0.232081818 |
| 11,763 | ARRB2     | -0.231982125 |
| 11,764 | HS3ST2    | -0.23162325  |
| 11,765 | PMM2      | -0.231490342 |
| 11,766 | UGT8      | -0.231426779 |
| 11,767 | RPL36     | -0.23137228  |
| 11,768 | PPP1R14B  | -0.231330544 |
| 11,769 | TSPY2     | -0.23107792  |
| 11,770 | RUSC1     | -0.230569136 |
| 11,771 | WDR5B     | -0.23055905  |
| 11,772 | LOC92154  | -0.230531096 |
| 11,773 | KIAA2026  | -0.230338075 |
| 11,774 | SYT10     | -0.230269322 |
| 11,775 | TMEM46    | -0.230133759 |
| 11,776 | MAST2     | -0.230032227 |
| 11,777 | TRIO      | -0.230003173 |
| 11,778 | STAT5A    | -0.229998173 |
| 11,779 | ORM2      | -0.22993329  |
| 11,780 | SLC29A3   | -0.229824279 |
| 11,781 | C6ORF70   | -0.229790715 |
| 11,782 | C6ORF129  | -0.229783782 |
| 11,783 | PADI3     | -0.229783298 |
| 11,784 | DRP2      | -0.229515812 |
| 11,785 | THOC1     | -0.22917271  |
| 11,786 | NRXN2     | -0.229134387 |
| 11,787 | MCCC1     | -0.229093405 |
| 11,788 | CGI-105   | -0.229054064 |

|        |                      |              |
|--------|----------------------|--------------|
| 11,789 | <i>DC13</i>          | -0.228793473 |
| 11,790 | <i>HCAP-G</i>        | -0.228390936 |
| 11,791 | <i>LIG4</i>          | -0.228195682 |
| 11,792 | <i>LOC136306</i>     | -0.228022127 |
| 11,793 | <i>DCL-1</i>         | -0.228018895 |
| 11,794 | <i>PPP3CC</i>        | -0.227954203 |
| 11,795 | <i>DKFZP564O1664</i> | -0.227948973 |
| 11,796 | <i>TGFBR1</i>        | -0.227928294 |
| 11,797 | <i>OPA1</i>          | -0.227848699 |
| 11,798 | <i>PERLD1</i>        | -0.227845067 |
| 11,799 | <i>BAI1</i>          | -0.227815625 |
| 11,800 | <i>MAS1</i>          | -0.227343482 |
| 11,801 | <i>USP8</i>          | -0.227224446 |
| 11,802 | <i>UMP-CMPK</i>      | -0.227061436 |
| 11,803 | <i>C9ORF111</i>      | -0.227024465 |
| 11,804 | <i>NRG4</i>          | -0.226929414 |
| 11,805 | <i>CPNE2</i>         | -0.226790665 |
| 11,806 | <i>ST8SIA1</i>       | -0.2267846   |
| 11,807 | <i>CD1D</i>          | -0.226693012 |
| 11,808 | <i>CABP7</i>         | -0.226614812 |
| 11,809 | <i>ARPM2</i>         | -0.226297097 |
| 11,810 | <i>TBC1D13</i>       | -0.226221197 |
| 11,811 | <i>RALY</i>          | -0.226077341 |
| 11,812 | <i>AMY1B</i>         | -0.225621554 |
| 11,813 | <i>ZNF12</i>         | -0.225592559 |
| 11,814 | <i>HOMER3</i>        | -0.225572924 |
| 11,815 | <i>PCDHGC4</i>       | -0.225507084 |
| 11,816 | <i>HNRPA0</i>        | -0.225487817 |
| 11,817 | <i>LOC100134257</i>  | -0.22508226  |
| 11,818 | <i>ZNF157</i>        | -0.224935213 |
| 11,819 | <i>POTE8</i>         | -0.224824921 |
| 11,820 | <i>PXN</i>           | -0.224705656 |
| 11,821 | <i>RHCG</i>          | -0.224580307 |
| 11,822 | <i>HRB2</i>          | -0.224512019 |
| 11,823 | <i>FZD9</i>          | -0.224126007 |
| 11,824 | <i>COCH</i>          | -0.224013316 |
| 11,825 | <i>FLJ32934</i>      | -0.223995112 |
| 11,826 | <i>CORT</i>          | -0.223798408 |
| 11,827 | <i>NF1</i>           | -0.223703199 |
| 11,828 | <i>OR4S2</i>         | -0.223671868 |
| 11,829 | <i>LASS5</i>         | -0.223594235 |
| 11,830 | <i>EFA6R</i>         | -0.223575    |
| 11,831 | <i>NACA</i>          | -0.223555276 |
| 11,832 | <i>DDX53</i>         | -0.223549976 |
| 11,833 | <i>KIAA1229</i>      | -0.2234672   |
| 11,834 | <i>MAGEA12</i>       | -0.223304652 |
| 11,835 | <i>GSTZ1</i>         | -0.223126493 |

|        |                  |              |
|--------|------------------|--------------|
| 11,836 | <i>SPAM1</i>     | -0.222792694 |
| 11,837 | <i>SH3BGRL</i>   | -0.222073601 |
| 11,838 | <i>GABRB3</i>    | -0.221994458 |
| 11,839 | <i>ITGA6</i>     | -0.2219482   |
| 11,840 | <i>KCNK9</i>     | -0.221945529 |
| 11,841 | <i>MKRN1</i>     | -0.221896579 |
| 11,842 | <i>NK4</i>       | -0.22185076  |
| 11,843 | <i>ZFHX2</i>     | -0.221734557 |
| 11,844 | <i>DOCK9</i>     | -0.221263346 |
| 11,845 | <i>LIME1</i>     | -0.221070609 |
| 11,846 | <i>FLJ46481</i>  | -0.220994916 |
| 11,847 | <i>NR6A1</i>     | -0.220916475 |
| 11,848 | <i>ARTN</i>      | -0.22089829  |
| 11,849 | <i>HMGA1</i>     | -0.220817145 |
| 11,850 | <i>OR13C8</i>    | -0.220570111 |
| 11,851 | <i>TNFSF10</i>   | -0.220450078 |
| 11,852 | <i>HUWE1</i>     | -0.220384429 |
| 11,853 | <i>FXYD6</i>     | -0.220225021 |
| 11,854 | <i>SLAMF7</i>    | -0.219980667 |
| 11,855 | <i>SPAG6</i>     | -0.21982086  |
| 11,856 | <i>CALCRL</i>    | -0.219501602 |
| 11,857 | <i>MSC</i>       | -0.219474668 |
| 11,858 | <i>ZNF211</i>    | -0.219337655 |
| 11,859 | <i>EGR2</i>      | -0.219288745 |
| 11,860 | <i>FBXW2</i>     | -0.219216839 |
| 11,861 | <i>ZNF462</i>    | -0.218858077 |
| 11,862 | <i>LOC653111</i> | -0.218816986 |
| 11,863 | <i>SLC1A4</i>    | -0.21830646  |
| 11,864 | <i>ZDHHC2</i>    | -0.218289219 |
| 11,865 | <i>GPR149</i>    | -0.218227643 |
| 11,866 | <i>NUP54</i>     | -0.218226187 |
| 11,867 | <i>C20ORF135</i> | -0.218169313 |
| 11,868 | <i>MGC15887</i>  | -0.217505563 |
| 11,869 | <i>HPRT1</i>     | -0.217469571 |
| 11,870 | <i>HAL</i>       | -0.216923137 |
| 11,871 | <i>FBXO11</i>    | -0.216882971 |
| 11,872 | <i>OR10A3</i>    | -0.21667676  |
| 11,873 | <i>MGC20255</i>  | -0.216409493 |
| 11,874 | <i>LOC51035</i>  | -0.216358227 |
| 11,875 | <i>FLJ11301</i>  | -0.216342373 |
| 11,876 | <i>BOC</i>       | -0.216339879 |
| 11,877 | <i>LOC128977</i> | -0.216283865 |
| 11,878 | <i>NCAM1</i>     | -0.216276721 |
| 11,879 | <i>FLJ39502</i>  | -0.216072048 |
| 11,880 | <i>ZNF20</i>     | -0.215926094 |
| 11,881 | <i>AQP7</i>      | -0.215800858 |
| 11,882 | <i>SMPDL3B</i>   | -0.215696857 |

|        |                     |              |
|--------|---------------------|--------------|
| 11,883 | <i>DNAH6</i>        | -0.215666318 |
| 11,884 | <i>APOD</i>         | -0.215653305 |
| 11,885 | <i>CRK</i>          | -0.215534348 |
| 11,886 | <i>CXorf34</i>      | -0.215476367 |
| 11,887 | <i>ZNF434</i>       | -0.215365761 |
| 11,888 | <i>ICAM5</i>        | -0.215248173 |
| 11,889 | <i>LOC144404</i>    | -0.215217634 |
| 11,890 | <i>MGC20806</i>     | -0.215051864 |
| 11,891 | <i>TNFAIP3</i>      | -0.214190349 |
| 11,892 | <i>OR8H2</i>        | -0.214136631 |
| 11,893 | <i>PC</i>           | -0.21391552  |
| 11,894 | <i>GPR31</i>        | -0.213820438 |
| 11,895 | <i>SP5</i>          | -0.213736487 |
| 11,896 | <i>C14ORF148</i>    | -0.213608088 |
| 11,897 | <i>EXT1</i>         | -0.213507329 |
| 11,898 | <i>SEL1L</i>        | -0.213398206 |
| 11,899 | <i>GPR75</i>        | -0.213205507 |
| 11,900 | <i>SH3MD4</i>       | -0.213042771 |
| 11,901 | <i>DMBT1</i>        | -0.21275668  |
| 11,902 | <i>C9ORF114</i>     | -0.212574491 |
| 11,903 | <i>MGAT5B</i>       | -0.212392689 |
| 11,904 | <i>OR4C11</i>       | -0.212209217 |
| 11,905 | <i>FRDA</i>         | -0.212063585 |
| 11,906 | <i>PRDM15</i>       | -0.211873007 |
| 11,907 | <i>NDUFA6</i>       | -0.211870996 |
| 11,908 | <i>TNFRSF10A</i>    | -0.211828975 |
| 11,909 | <i>SPCS3</i>        | -0.211815075 |
| 11,910 | <i>LOC144233</i>    | -0.211457943 |
| 11,911 | <i>ST6GALNAC2</i>   | -0.21144584  |
| 11,912 | <i>LOC442117</i>    | -0.210995533 |
| 11,913 | <i>LOC653509</i>    | -0.210991268 |
| 11,914 | <i>LOC200030</i>    | -0.210894503 |
| 11,915 | <i>GNG12</i>        | -0.210870878 |
| 11,916 | <i>RNF157</i>       | -0.210768293 |
| 11,917 | <i>APPBP2</i>       | -0.210303229 |
| 11,918 | <i>DKFZP434C184</i> | -0.210201104 |
| 11,919 | <i>MAPKAP1</i>      | -0.209853195 |
| 11,920 | <i>IMP5</i>         | -0.209609141 |
| 11,921 | <i>ZIM3</i>         | -0.209426839 |
| 11,922 | <i>POU2F2</i>       | -0.209276339 |
| 11,923 | <i>AKAP28</i>       | -0.209220045 |
| 11,924 | <i>WBSCR22</i>      | -0.209095356 |
| 11,925 | <i>LOC286187</i>    | -0.208689738 |
| 11,926 | <i>ARHGEF11</i>     | -0.208534869 |
| 11,927 | <i>PPP1CA</i>       | -0.208416588 |
| 11,928 | <i>RNF125</i>       | -0.208298471 |
| 11,929 | <i>IFNA5</i>        | -0.208159349 |

|        |                  |              |
|--------|------------------|--------------|
| 11,930 | <i>MGC72075</i>  | -0.20811781  |
| 11,931 | <i>MAP3K7IP1</i> | -0.207664859 |
| 11,932 | <i>C10ORF22</i>  | -0.207451065 |
| 11,933 | <i>KIAA0174</i>  | -0.207441142 |
| 11,934 | <i>MATR3</i>     | -0.207267624 |
| 11,935 | <i>MRPL36</i>    | -0.206981196 |
| 11,936 | <i>THAP5</i>     | -0.20686158  |
| 11,937 | <i>MYO18A</i>    | -0.206125992 |
| 11,938 | <i>RAB30</i>     | -0.206033594 |
| 11,939 | <i>MGC34713</i>  | -0.205609949 |
| 11,940 | <i>FLJ33387</i>  | -0.205535596 |
| 11,941 | <i>SFXN4</i>     | -0.205435533 |
| 11,942 | <i>BIVM</i>      | -0.204910206 |
| 11,943 | <i>PCP2</i>      | -0.204779829 |
| 11,944 | <i>STX18</i>     | -0.204761875 |
| 11,945 | <i>GFOD1</i>     | -0.204509001 |
| 11,946 | <i>TMEM15</i>    | -0.204338329 |
| 11,947 | <i>RAB35</i>     | -0.204200592 |
| 11,948 | <i>OR9Q2</i>     | -0.203725363 |
| 11,949 | <i>C20ORF18</i>  | -0.203517327 |
| 11,950 | <i>ZNF142</i>    | -0.203315659 |
| 11,951 | <i>ORC3L</i>     | -0.203277499 |
| 11,952 | <i>BBP</i>       | -0.203196694 |
| 11,953 | <i>USP27X</i>    | -0.20317794  |
| 11,954 | <i>MPDZ</i>      | -0.203082554 |
| 11,955 | <i>RLN1</i>      | -0.203081021 |
| 11,956 | <i>CAMP</i>      | -0.202609276 |
| 11,957 | <i>CRYGS</i>     | -0.202532505 |
| 11,958 | <i>SPRED3</i>    | -0.202377324 |
| 11,959 | <i>RAD1</i>      | -0.201931357 |
| 11,960 | <i>STH</i>       | -0.201903111 |
| 11,961 | <i>LOC149643</i> | -0.201648293 |
| 11,962 | <i>CTSS</i>      | -0.201576864 |
| 11,963 | <i>SKB1</i>      | -0.201351628 |
| 11,964 | <i>COTL1</i>     | -0.20120099  |
| 11,965 | <i>IL17RC</i>    | -0.200871423 |
| 11,966 | <i>GPR22</i>     | -0.200783892 |
| 11,967 | <i>R30953_1</i>  | -0.200432953 |
| 11,968 | <i>DUOX2</i>     | -0.20025955  |
| 11,969 | <i>RTKN</i>      | -0.200008942 |
| 11,970 | <i>CGI-150</i>   | -0.199672444 |
| 11,971 | <i>SYCP2</i>     | -0.199367549 |
| 11,972 | <i>KCNT1</i>     | -0.199237513 |
| 11,973 | <i>FHL5</i>      | -0.198926064 |
| 11,974 | <i>PPA2</i>      | -0.198878841 |
| 11,975 | <i>KRT6L</i>     | -0.198795179 |
| 11,976 | <i>GNG8</i>      | -0.198595451 |

|        |                   |              |
|--------|-------------------|--------------|
| 11,977 | <i>CUTL2</i>      | -0.198251642 |
| 11,978 | <i>POLH</i>       | -0.198223832 |
| 11,979 | <i>UPK1B</i>      | -0.1982031   |
| 11,980 | <i>CACNA1I</i>    | -0.198104205 |
| 11,981 | <i>MYOD1</i>      | -0.197890506 |
| 11,982 | <i>RBL2</i>       | -0.197649838 |
| 11,983 | <i>TSHR</i>       | -0.197596526 |
| 11,984 | <i>FLJ12604</i>   | -0.197408662 |
| 11,985 | <i>NALP1</i>      | -0.197064684 |
| 11,986 | <i>HECW1</i>      | -0.196882454 |
| 11,987 | <i>STATIP1</i>    | -0.196862143 |
| 11,988 | <i>CDYL</i>       | -0.196718581 |
| 11,989 | <i>PHF1</i>       | -0.196639447 |
| 11,990 | <i>C6ORF51</i>    | -0.196569391 |
| 11,991 | <i>USP31</i>      | -0.195998593 |
| 11,992 | <i>TYROBP</i>     | -0.195780946 |
| 11,993 | <i>FLJ45224</i>   | -0.195740508 |
| 11,994 | <i>SYCP2</i>      | -0.195597452 |
| 11,995 | <i>PCSK1</i>      | -0.195536073 |
| 11,996 | <i>TPPP</i>       | -0.195457129 |
| 11,997 | <i>MAFG</i>       | -0.195369181 |
| 11,998 | <i>SIDT1</i>      | -0.194943274 |
| 11,999 | <i>SEC15L1</i>    | -0.194903593 |
| 12,000 | <i>NOLA2</i>      | -0.194474779 |
| 12,001 | <i>OR1Q1</i>      | -0.194472314 |
| 12,002 | <i>IDUA</i>       | -0.194413416 |
| 12,003 | <i>CDS2</i>       | -0.194184041 |
| 12,004 | <i>COL27A1</i>    | -0.194034256 |
| 12,005 | <i>MGC42105</i>   | -0.193842789 |
| 12,006 | <i>KIFAP3</i>     | -0.193649349 |
| 12,007 | <i>PWDMP</i>      | -0.193568111 |
| 12,008 | <i>SNAPAP</i>     | -0.193376258 |
| 12,009 | <i>SNAPAP</i>     | -0.193376258 |
| 12,010 | <i>OR5T1</i>      | -0.193305308 |
| 12,011 | <i>C2ORF21</i>    | -0.193164696 |
| 12,012 | <i>HRIHFB2122</i> | -0.192860533 |
| 12,013 | <i>CDKL3</i>      | -0.192780475 |
| 12,014 | <i>OR4A47</i>     | -0.192742617 |
| 12,015 | <i>MGC39350</i>   | -0.192271604 |
| 12,016 | <i>CHKB</i>       | -0.192056059 |
| 12,017 | <i>SLCO2A1</i>    | -0.192051171 |
| 12,018 | <i>METTL2</i>     | -0.191691501 |
| 12,019 | <i>NRG2</i>       | -0.191405117 |
| 12,020 | <i>FTHL17</i>     | -0.191360669 |
| 12,021 | <i>GCM1</i>       | -0.19123313  |
| 12,022 | <i>EIF3S1</i>     | -0.191161876 |
| 12,023 | <i>NEB</i>        | -0.191148807 |



|        |                  |              |
|--------|------------------|--------------|
| 12,024 | <i>LOC389421</i> | -0.190864832 |
| 12,025 | <i>SNTG1</i>     | -0.190708021 |
| 12,026 | <i>LOC203413</i> | -0.190686438 |
| 12,027 | <i>FLJ20259</i>  | -0.190453195 |
| 12,028 | <i>ZIC3</i>      | -0.190090601 |
| 12,029 | <i>C8ORF13</i>   | -0.189993348 |
| 12,030 | <i>C18orf56</i>  | -0.189567778 |
| 12,031 | <i>PLAG1</i>     | -0.18890027  |
| 12,032 | <i>MGC39497</i>  | -0.188628494 |
| 12,033 | <i>HS2ST1</i>    | -0.188174071 |
| 12,034 | <i>MGC4645</i>   | -0.187951067 |
| 12,035 | <i>EGFL6</i>     | -0.187885598 |
| 12,036 | <i>FLJ22570</i>  | -0.187801722 |
| 12,037 | <i>OR4C3</i>     | -0.187569694 |
| 12,038 | <i>OR4D5</i>     | -0.187453569 |
| 12,039 | <i>NKX2-8</i>    | -0.187288452 |
| 12,040 | <i>ATOH1</i>     | -0.187114524 |
| 12,041 | <i>POLK</i>      | -0.186847963 |
| 12,042 | <i>LIPF</i>      | -0.186663607 |
| 12,043 | <i>FBXO28</i>    | -0.186542694 |
| 12,044 | <i>TAL2</i>      | -0.186473413 |
| 12,045 | <i>AP1M2</i>     | -0.18645071  |
| 12,046 | <i>SLC39A5</i>   | -0.186338775 |
| 12,047 | <i>HNLF</i>      | -0.186211604 |
| 12,048 | <i>CDK5</i>      | -0.186190071 |
| 12,049 | <i>FSHB</i>      | -0.186139241 |
| 12,050 | <i>ECE1</i>      | -0.185905718 |
| 12,051 | <i>LOC388335</i> | -0.18589733  |
| 12,052 | <i>DHX34</i>     | -0.185781707 |
| 12,053 | <i>TMEM38B</i>   | -0.185630524 |
| 12,054 | <i>TMEM38B</i>   | -0.185630524 |
| 12,055 | <i>TACR3</i>     | -0.185406868 |
| 12,056 | <i>THBS1</i>     | -0.185333104 |
| 12,057 | <i>NMI</i>       | -0.184801596 |
| 12,058 | <i>OSMR</i>      | -0.184314395 |
| 12,059 | <i>LOC283514</i> | -0.184254523 |
| 12,060 | <i>SRRP35</i>    | -0.184160838 |
| 12,061 | <i>COX4I1</i>    | -0.184150768 |
| 12,062 | <i>DIRC1</i>     | -0.184075309 |
| 12,063 | <i>HCST</i>      | -0.183852565 |
| 12,064 | <i>ZNF552</i>    | -0.183838726 |
| 12,065 | <i>FLJ23342</i>  | -0.183810604 |
| 12,066 | <i>FLJ22609</i>  | -0.183748888 |
| 12,067 | <i>SLC19A2</i>   | -0.183663919 |
| 12,068 | <i>GRIA2</i>     | -0.183609249 |
| 12,069 | <i>MGC23909</i>  | -0.183470679 |
| 12,070 | <i>ADCY9</i>     | -0.183315775 |

|        |                      |              |
|--------|----------------------|--------------|
| 12,071 | <i>PDE1C</i>         | -0.183264357 |
| 12,072 | <i>FLJ14753</i>      | -0.182688155 |
| 12,073 | <i>C18ORF4</i>       | -0.182445886 |
| 12,074 | <i>SNRPN</i>         | -0.182426043 |
| 12,075 | <i>P2RY5</i>         | -0.182238346 |
| 12,076 | <i>HMGB3</i>         | -0.182175329 |
| 12,077 | <i>PRG2</i>          | -0.18213753  |
| 12,078 | <i>KIAA1164</i>      | -0.18213531  |
| 12,079 | <i>FLJ10647</i>      | -0.181535562 |
| 12,080 | <i>LOC55954</i>      | -0.181202319 |
| 12,081 | <i>MMP11</i>         | -0.181083827 |
| 12,082 | <i>HSD17B6</i>       | -0.181021566 |
| 12,083 | <i>MAP4K3</i>        | -0.180774694 |
| 12,084 | <i>SUMO3</i>         | -0.180668442 |
| 12,085 | <i>BARHL1</i>        | -0.180617018 |
| 12,086 | <i>C20ORF19</i>      | -0.180172267 |
| 12,087 | <i>LOC653314</i>     | -0.180118863 |
| 12,088 | <i>SLC27A1</i>       | -0.1793      |
| 12,089 | <i>DNAJB11</i>       | -0.179292019 |
| 12,090 | <i>EPHA8</i>         | -0.179133033 |
| 12,091 | <i>FLJ32000</i>      | -0.179130899 |
| 12,092 | <i>DDOST</i>         | -0.178998962 |
| 12,093 | <i>CHRM3</i>         | -0.178892334 |
| 12,094 | <i>XPO1</i>          | -0.178872151 |
| 12,095 | <i>H2AFB2</i>        | -0.178851619 |
| 12,096 | <i>MRC2</i>          | -0.17859901  |
| 12,097 | <i>MGAM</i>          | -0.178362203 |
| 12,098 | <i>Polio #1</i>      | -0.177384879 |
| 12,099 | <i>ALDH9A1</i>       | -0.177015036 |
| 12,100 | <i>CHCHD6</i>        | -0.17700808  |
| 12,101 | <i>KLF12</i>         | -0.176601751 |
| 12,102 | <i>MCEE</i>          | -0.176312439 |
| 12,103 | <i>DKFZP434F2021</i> | -0.176191623 |
| 12,104 | <i>FLJ13848</i>      | -0.176057588 |
| 12,105 | <i>ZNF505</i>        | -0.175986199 |
| 12,106 | <i>CXCL3</i>         | -0.17598241  |
| 12,107 | <i>DUX5</i>          | -0.175979599 |
| 12,108 | <i>LOC202134</i>     | -0.17533908  |
| 12,109 | <i>XTP7</i>          | -0.175309354 |
| 12,110 | <i>LOC84518</i>      | -0.175284562 |
| 12,111 | <i>S100A13</i>       | -0.175276167 |
| 12,112 | <i>MGAT1</i>         | -0.175230414 |
| 12,113 | <i>ST3GAL6</i>       | -0.17472679  |
| 12,114 | <i>BBC3</i>          | -0.174573464 |
| 12,115 | <i>MAN1A2</i>        | -0.174553813 |
| 12,116 | <i>INSM2</i>         | -0.173480127 |

|        |                  |              |
|--------|------------------|--------------|
| 12,117 | <i>DAP13</i>     | -0.173472297 |
| 12,118 | <i>H2AFX</i>     | -0.172898879 |
| 12,119 | <i>KIAA1836</i>  | -0.172764434 |
| 12,120 | <i>FLJ21901</i>  | -0.172740282 |
| 12,121 | <i>FLJ10945</i>  | -0.172631651 |
| 12,122 | <i>PMM2</i>      | -0.172592477 |
| 12,123 | <i>BFSP2</i>     | -0.172553501 |
| 12,124 | <i>PHACTR1</i>   | -0.172392144 |
| 12,125 | <i>ABCA4</i>     | -0.172331214 |
| 12,126 | <i>DDB1</i>      | -0.172280015 |
| 12,127 | <i>BTNL3</i>     | -0.172175906 |
| 12,128 | <i>ZNF179</i>    | -0.171909118 |
| 12,129 | <i>EDNRA</i>     | -0.171636144 |
| 12,130 | <i>MAFK</i>      | -0.171609468 |
| 12,131 | <i>PDGFB</i>     | -0.17160527  |
| 12,132 | <i>KIAA1268</i>  | -0.171581116 |
| 12,133 | <i>LHX9</i>      | -0.1715012   |
| 12,134 | <i>C11ORF9</i>   | -0.171345769 |
| 12,135 | <i>TRIM62</i>    | -0.171324297 |
| 12,136 | <i>KIAA1432</i>  | -0.171191445 |
| 12,137 | <i>ZNF141</i>    | -0.171159689 |
| 12,138 | <i>LOC441282</i> | -0.170253596 |
| 12,139 | <i>C9ORF19</i>   | -0.170137984 |
| 12,140 | <i>MYCBP2</i>    | -0.170049325 |
| 12,141 | <i>HECA</i>      | -0.170003009 |
| 12,142 | <i>DEF6</i>      | -0.16954567  |
| 12,143 | <i>NDUFS7</i>    | -0.169391493 |
| 12,144 | <i>CD14</i>      | -0.169389564 |
| 12,145 | <i>ZDHHC22</i>   | -0.169199001 |
| 12,146 | <i>MIP</i>       | -0.169136273 |
| 12,147 | <i>B3GNT1</i>    | -0.169129676 |
| 12,148 | <i>SGCB</i>      | -0.169014397 |
| 12,149 | <i>SYN3</i>      | -0.169013289 |
| 12,150 | <i>MAP3K13</i>   | -0.169006484 |
| 12,151 | <i>SLC6A3</i>    | -0.168594505 |
| 12,152 | <i>KLHL5</i>     | -0.168449155 |
| 12,153 | <i>LST-3</i>     | -0.167905387 |
| 12,154 | <i>TSPAN8</i>    | -0.16766312  |
| 12,155 | <i>LOC340843</i> | -0.167517709 |
| 12,156 | <i>HIST1H2AG</i> | -0.167505101 |
| 12,157 | <i>ART1</i>      | -0.167398468 |
| 12,158 | <i>GPR160</i>    | -0.167373469 |
| 12,159 | <i>MGC52010</i>  | -0.166976878 |
| 12,160 | <i>CRYAA</i>     | -0.166839842 |
| 12,161 | <i>FLJ31052</i>  | -0.166668208 |
| 12,162 | <i>SPINT1</i>    | -0.166313406 |
| 12,163 | <i>BLOC1S1</i>   | -0.165875469 |

|        |           |              |
|--------|-----------|--------------|
| 12,164 | UNQ755    | -0.165834237 |
| 12,165 | SLC5A4    | -0.165454163 |
| 12,166 | OR5P2     | -0.16538567  |
| 12,167 | GPR62     | -0.165240857 |
| 12,168 | SYCP1     | -0.16523884  |
| 12,169 | FLJ32115  | -0.165197602 |
| 12,170 | RNF183    | -0.1651193   |
| 12,171 | C20ORF141 | -0.164969108 |
| 12,172 | FLJ22170  | -0.164949009 |
| 12,173 | CYP11A1   | -0.164598683 |
| 12,174 | SPAST     | -0.164384027 |
| 12,175 | TOB1      | -0.164187294 |
| 12,176 | DDX56     | -0.164163695 |
| 12,177 | RAI2      | -0.16403834  |
| 12,178 | FLJ10900  | -0.163762271 |
| 12,179 | LIMS1     | -0.163652171 |
| 12,180 | FANCD2    | -0.163574007 |
| 12,181 | RP1L1     | -0.163519912 |
| 12,182 | ADCY6     | -0.163403831 |
| 12,183 | LOC126017 | -0.163166104 |
| 12,184 | MGC35521  | -0.163132428 |
| 12,185 | ERP70     | -0.163065236 |
| 12,186 | GGTLA4    | -0.162953109 |
| 12,187 | TMEM22    | -0.162872759 |
| 12,188 | GGT2      | -0.162692995 |
| 12,189 | FLJ10761  | -0.162615868 |
| 12,190 | NEXN      | -0.162336679 |
| 12,191 | IL9       | -0.162226761 |
| 12,192 | OXCT1     | -0.162027873 |
| 12,193 | MGC40222  | -0.161991009 |
| 12,194 | TIRAP     | -0.16197283  |
| 12,195 | INSL3     | -0.161909958 |
| 12,196 | VCX3      | -0.161866209 |
| 12,197 | HEXB      | -0.161581228 |
| 12,198 | MGC2474   | -0.16138339  |
| 12,199 | RNF24     | -0.161019108 |
| 12,200 | PGM2L1    | -0.160976449 |
| 12,201 | CGI-111   | -0.160789828 |
| 12,202 | NDUFS2    | -0.160324304 |
| 12,203 | OSAP      | -0.160282843 |
| 12,204 | CAPN5     | -0.160241451 |
| 12,205 | C6ORF62   | -0.159988295 |
| 12,206 | KIAA0912  | -0.159699148 |
| 12,207 | LOC283755 | -0.15960621  |
| 12,208 | NDFIP1    | -0.159593431 |
| 12,209 | KRTAP5-8  | -0.15950729  |
| 12,210 | PGGT1B    | -0.15893722  |

|        |                      |              |
|--------|----------------------|--------------|
| 12,211 | <i>SLC10A4</i>       | -0.158876338 |
| 12,212 | <i>OR1I1</i>         | -0.158535511 |
| 12,213 | <i>CENPE</i>         | -0.158472893 |
| 12,214 | <i>TRAPPC4</i>       | -0.158091258 |
| 12,215 | <i>JMJD1B</i>        | -0.1577344   |
| 12,216 | <i>KIBRA</i>         | -0.157419805 |
| 12,217 | <i>DKFZP434B0335</i> | -0.157112834 |
| 12,218 | <i>DAZAP2</i>        | -0.156981202 |
| 12,219 | <i>C14ORF4</i>       | -0.156941922 |
| 12,220 | <i>NVL</i>           | -0.156879383 |
| 12,221 | <i>SERPINA6</i>      | -0.156545273 |
| 12,222 | <i>ZDHH6</i>         | -0.156510722 |
| 12,223 | <i>UNQ2446</i>       | -0.156433039 |
| 12,224 | <i>BTG4</i>          | -0.156404108 |
| 12,225 | <i>UQCRB</i>         | -0.156322772 |
| 12,226 | <i>OR4K13</i>        | -0.156309925 |
| 12,227 | <i>EDG6</i>          | -0.156139872 |
| 12,228 | <i>OR2F1</i>         | -0.155995911 |
| 12,229 | <i>C9ORF100</i>      | -0.15577009  |
| 12,230 | <i>KCNMB2</i>        | -0.155460174 |
| 12,231 | <i>HDHD4</i>         | -0.155433085 |
| 12,232 | <i>C9ORF82</i>       | -0.155430213 |
| 12,233 | <i>PTMA</i>          | -0.155284629 |
| 12,234 | <i>LOC65121</i>      | -0.155223963 |
| 12,235 | <i>ZNF620</i>        | -0.15513804  |
| 12,236 | <i>POLR1D</i>        | -0.154747731 |
| 12,237 | <i>OR5D18</i>        | -0.154722222 |
| 12,238 | <i>C19ORF19</i>      | -0.154610001 |
| 12,239 | <i>TENR</i>          | -0.154072786 |
| 12,240 | <i>OR2T27</i>        | -0.153900335 |
| 12,241 | <i>CECR5</i>         | -0.153791878 |
| 12,242 | <i>SCDR10</i>        | -0.153744044 |
| 12,243 | <i>FXD7</i>          | -0.153616784 |
| 12,244 | <i>FLJ32112</i>      | -0.153346842 |
| 12,245 | <i>ACOX2</i>         | -0.153177901 |
| 12,246 | <i>PVRL1</i>         | -0.153148515 |
| 12,247 | <i>ATP1A2</i>        | -0.153146636 |
| 12,248 | <i>FLJ21168</i>      | -0.15312271  |
| 12,249 | <i>APOBEC3B</i>      | -0.153120344 |
| 12,250 | <i>RGL2</i>          | -0.152022111 |
| 12,251 | <i>CIG5</i>          | -0.151535711 |
| 12,252 | <i>TRIM59</i>        | -0.151528045 |
| 12,253 | <i>ACDC</i>          | -0.151491863 |
| 12,254 | <i>NOPE</i>          | -0.151303264 |
| 12,255 | <i>PYGM</i>          | -0.151213101 |
| 12,256 | <i>PDZK2</i>         | -0.151192808 |
| 12,257 | <i>E2F2</i>          | -0.151080977 |

|        |                  |              |
|--------|------------------|--------------|
| 12,258 | <i>PFTK1</i>     | -0.151074199 |
| 12,259 | <i>SPATA6</i>    | -0.151041063 |
| 12,260 | <i>FLJ14249</i>  | -0.150931437 |
| 12,261 | <i>BAG1</i>      | -0.150487914 |
| 12,262 | <i>HDAC4</i>     | -0.150363054 |
| 12,263 | <i>CIAO1</i>     | -0.150228323 |
| 12,264 | <i>PLGLB1</i>    | -0.149896856 |
| 12,265 | <i>ENAM</i>      | -0.149416149 |
| 12,266 | <i>RAD50</i>     | -0.149314755 |
| 12,267 | <i>NOL6</i>      | -0.148778276 |
| 12,268 | <i>EPAS1</i>     | -0.148512855 |
| 12,269 | <i>FLJ90024</i>  | -0.148016415 |
| 12,270 | <i>TXNL2</i>     | -0.147972943 |
| 12,271 | <i>PP9099</i>    | -0.147705819 |
| 12,272 | <i>NRP1</i>      | -0.147580787 |
| 12,273 | <i>RAB7B</i>     | -0.147310846 |
| 12,274 | <i>ANAPC5</i>    | -0.14694735  |
| 12,275 | <i>MGC20533</i>  | -0.14686939  |
| 12,276 | <i>CKLFSF8</i>   | -0.146859182 |
| 12,277 | <i>LOC92162</i>  | -0.146789973 |
| 12,278 | <i>LU</i>        | -0.146752912 |
| 12,279 | <i>SPHK2</i>     | -0.146604452 |
| 12,280 | <i>FLJ32915</i>  | -0.146573525 |
| 12,281 | <i>CYP4Z1</i>    | -0.146506257 |
| 12,282 | <i>OR13J1</i>    | -0.146165738 |
| 12,283 | <i>MYB</i>       | -0.145983716 |
| 12,284 | <i>IFRG28</i>    | -0.145893251 |
| 12,285 | <i>KIAA1906</i>  | -0.145883659 |
| 12,286 | <i>ING1L</i>     | -0.145198295 |
| 12,287 | <i>RARRES1</i>   | -0.145196992 |
| 12,288 | <i>CNNM4</i>     | -0.144933068 |
| 12,289 | <i>ST5</i>       | -0.14425963  |
| 12,290 | <i>VCAM1</i>     | -0.144176057 |
| 12,291 | <i>CYB5</i>      | -0.144015373 |
| 12,292 | <i>CRY2</i>      | -0.143938101 |
| 12,293 | <i>CADPS</i>     | -0.143878672 |
| 12,294 | <i>LOC729440</i> | -0.143858167 |
| 12,295 | <i>NUP210</i>    | -0.143821478 |
| 12,296 | <i>GFAP</i>      | -0.143652935 |
| 12,297 | <i>PEX7</i>      | -0.143569695 |
| 12,298 | <i>B3GNT6</i>    | -0.143546302 |
| 12,299 | <i>MARK1</i>     | -0.143455519 |
| 12,300 | <i>RNF113A</i>   | -0.143368244 |
| 12,301 | <i>MYH13</i>     | -0.143274817 |
| 12,302 | <i>SSTR3</i>     | -0.143226313 |
| 12,303 | <i>STK31</i>     | -0.14271453  |
| 12,304 | <i>ATP10A</i>    | -0.142428579 |

|        |              |              |
|--------|--------------|--------------|
| 12,305 | ASP          | -0.14227267  |
| 12,306 | FLJ34960     | -0.142216637 |
| 12,307 | GALNT2       | -0.142155137 |
| 12,308 | PR48         | -0.141742597 |
| 12,309 | FLJ25323     | -0.141508457 |
| 12,310 | MGC15429     | -0.141354684 |
| 12,311 | ZNF180       | -0.141127148 |
| 12,312 | C20ORF128    | -0.140984296 |
| 12,313 | C14ORF94     | -0.140902339 |
| 12,314 | PIP3AP       | -0.140882144 |
| 12,315 | ERCC2        | -0.140694736 |
| 12,316 | CDK11        | -0.14065701  |
| 12,317 | ROCK2        | -0.140631955 |
| 12,318 | MGC4707      | -0.140408231 |
| 12,319 | EMX2         | -0.140395624 |
| 12,320 | NOX4         | -0.140034264 |
| 12,321 | SCN2A2       | -0.139966479 |
| 12,322 | CACNA2D2     | -0.13985272  |
| 12,323 | EHD1         | -0.139493787 |
| 12,324 | GAS          | -0.139359078 |
| 12,325 | SCGB3A2      | -0.139270676 |
| 12,326 | TWIST2       | -0.139064985 |
| 12,327 | CPSF1        | -0.138850417 |
| 12,328 | CS           | -0.138578218 |
| 12,329 | C6ORF74      | -0.13821     |
| 12,330 | ZNF533       | -0.138200852 |
| 12,331 | FNDC5        | -0.138183807 |
| 12,332 | ROM1         | -0.138064232 |
| 12,333 | TIGD2        | -0.138033104 |
| 12,334 | RARSL        | -0.13789913  |
| 12,335 | KIF4A        | -0.137268394 |
| 12,336 | HOXA13       | -0.13720948  |
| 12,337 | LRPAP1       | -0.137187315 |
| 12,338 | ZNF230       | -0.137043428 |
| 12,339 | LOC339977    | -0.136720763 |
| 12,340 | WNT7B        | -0.136314547 |
| 12,341 | SUPT6H       | -0.136241652 |
| 12,342 | DLG7         | -0.136164275 |
| 12,343 | KIAA1363     | -0.136142602 |
| 12,344 | CD69         | -0.135961159 |
| 12,345 | C1QTNF1      | -0.135798194 |
| 12,346 | CYYR1        | -0.135712921 |
| 12,347 | C20ORF152    | -0.135643966 |
| 12,348 | DKFZP564M182 | -0.135630026 |
| 12,349 | ZG16         | -0.135600005 |
| 12,350 | CHML         | -0.135492519 |
| 12,351 | NT5C2        | -0.135427007 |

|        |                  |              |
|--------|------------------|--------------|
| 12,352 | <i>EFHD2</i>     | -0.13536967  |
| 12,353 | <i>SECTM1</i>    | -0.135336203 |
| 12,354 | <i>SLC30A3</i>   | -0.135005227 |
| 12,355 | <i>PDE3B</i>     | -0.134955342 |
| 12,356 | <i>NGFRAP1</i>   | -0.134924908 |
| 12,357 | <i>PRG2</i>      | -0.134767758 |
| 12,358 | <i>C6ORF89</i>   | -0.13455036  |
| 12,359 | <i>APBA1</i>     | -0.13440886  |
| 12,360 | <i>WHSC2</i>     | -0.134279925 |
| 12,361 | <i>MEPE</i>      | -0.134228276 |
| 12,362 | <i>PGA5</i>      | -0.133981101 |
| 12,363 | <i>MGC13057</i>  | -0.133967367 |
| 12,364 | <i>LY6E</i>      | -0.133730054 |
| 12,365 | <i>SFXN2</i>     | -0.133692802 |
| 12,366 | <i>NAP1L2</i>    | -0.133687305 |
| 12,367 | <i>FOXF1</i>     | -0.133667813 |
| 12,368 | <i>SULT2A1</i>   | -0.133423252 |
| 12,369 | <i>IVD</i>       | -0.133370323 |
| 12,370 | <i>FLJ13213</i>  | -0.133331482 |
| 12,371 | <i>ALOXE3</i>    | -0.132956557 |
| 12,372 | <i>MEOX2</i>     | -0.132795682 |
| 12,373 | <i>SORCS1</i>    | -0.132725029 |
| 12,374 | <i>C9ORF40</i>   | -0.132609402 |
| 12,375 | <i>OR11G2</i>    | -0.132521513 |
| 12,376 | <i>AKT2</i>      | -0.132400309 |
| 12,377 | <i>C17ORF31</i>  | -0.132366872 |
| 12,378 | <i>GCK</i>       | -0.132300343 |
| 12,379 | <i>FLJ37183</i>  | -0.132200738 |
| 12,380 | <i>CEECAM1</i>   | -0.132122249 |
| 12,381 | <i>PAG</i>       | -0.132031703 |
| 12,382 | <i>NDUFS1</i>    | -0.131668381 |
| 12,383 | <i>RC3H1</i>     | -0.131574924 |
| 12,384 | <i>PDHA2</i>     | -0.131470626 |
| 12,385 | <i>IBRDC2</i>    | -0.131414283 |
| 12,386 | <i>ETV2</i>      | -0.131335493 |
| 12,387 | <i>STK22D</i>    | -0.131263164 |
| 12,388 | <i>LOC389541</i> | -0.131192297 |
| 12,389 | <i>ZFP161</i>    | -0.131167508 |
| 12,390 | <i>KCNQ5</i>     | -0.131022219 |
| 12,391 | <i>CATSPER3</i>  | -0.130692057 |
| 12,392 | <i>SPINK2</i>    | -0.1306409   |
| 12,393 | <i>CYP4F12</i>   | -0.130351288 |
| 12,394 | <i>PCDHGB1</i>   | -0.130161209 |
| 12,395 | <i>ZNF81</i>     | -0.130008035 |
| 12,396 | <i>UBE2W</i>     | -0.129794998 |
| 12,397 | <i>MGC33600</i>  | -0.129675765 |
| 12,398 | <i>RPL30</i>     | -0.129642637 |



|        |                  |              |
|--------|------------------|--------------|
| 12,399 | <i>ESSPL</i>     | -0.129478558 |
| 12,400 | <i>SGNE1</i>     | -0.12928024  |
| 12,401 | <i>C14ORF1</i>   | -0.129153933 |
| 12,402 | <i>FZD4</i>      | -0.129077825 |
| 12,403 | <i>MORF4L2</i>   | -0.128941505 |
| 12,404 | <i>ZNF31</i>     | -0.12892267  |
| 12,405 | <i>FOXL1</i>     | -0.128666642 |
| 12,406 | <i>STMN3</i>     | -0.128633255 |
| 12,407 | <i>ESM1</i>      | -0.128592625 |
| 12,408 | <i>CABLES1</i>   | -0.127892091 |
| 12,409 | <i>TEX14</i>     | -0.127698617 |
| 12,410 | <i>SPRR2B</i>    | -0.127641229 |
| 12,411 | <i>C20ORF111</i> | -0.127281795 |
| 12,412 | <i>PKP1</i>      | -0.127268554 |
| 12,413 | <i>USP25</i>     | -0.127239377 |
| 12,414 | <i>PCDHGA9</i>   | -0.12709374  |
| 12,415 | <i>CD99</i>      | -0.126906365 |
| 12,416 | <i>POU3F4</i>    | -0.126234313 |
| 12,417 | <i>EDARADD</i>   | -0.126032951 |
| 12,418 | <i>MAP3K15</i>   | -0.12573989  |
| 12,419 | <i>TM9SF4</i>    | -0.125419221 |
| 12,420 | <i>RHOT2</i>     | -0.125282655 |
| 12,421 | <i>MART2</i>     | -0.125181454 |
| 12,422 | <i>PALD</i>      | -0.125105248 |
| 12,423 | <i>TRAF3IP1</i>  | -0.124887856 |
| 12,424 | <i>METTL3</i>    | -0.124643279 |
| 12,425 | <i>TNRC9</i>     | -0.124639    |
| 12,426 | <i>FLJ14640</i>  | -0.123968256 |
| 12,427 | <i>TNFRSF9</i>   | -0.123944684 |
| 12,428 | <i>BC008967</i>  | -0.123780213 |
| 12,429 | <i>FLJ20436</i>  | -0.123780213 |
| 12,430 | <i>ZNF567</i>    | -0.123362858 |
| 12,431 | <i>IL1RAPL1</i>  | -0.122648122 |
| 12,432 | <i>KLF1</i>      | -0.12256724  |
| 12,433 | <i>MGC14817</i>  | -0.122560404 |
| 12,434 | <i>KIAA1944</i>  | -0.122456492 |
| 12,435 | <i>THAP1</i>     | -0.122304375 |
| 12,436 | <i>PEG10</i>     | -0.122302588 |
| 12,437 | <i>PRDM2</i>     | -0.122277692 |
| 12,438 | <i>SPTLC2</i>    | -0.122190086 |
| 12,439 | <i>NME2</i>      | -0.1218591   |
| 12,440 | <i>AP1G1</i>     | -0.121624826 |
| 12,441 | <i>PRSS12</i>    | -0.121373013 |
| 12,442 | <i>SERPINB5</i>  | -0.121286025 |
| 12,443 | <i>CD3D</i>      | -0.121043938 |
| 12,444 | <i>PIGF</i>      | -0.121015775 |
| 12,445 | <i>GYG</i>       | -0.120680254 |

|        |                     |              |
|--------|---------------------|--------------|
| 12,446 | <i>TNFSF12</i>      | -0.120624144 |
| 12,447 | <i>MGC20398</i>     | -0.120616076 |
| 12,448 | <i>EVC2</i>         | -0.120356933 |
| 12,449 | <i>KIRREL3</i>      | -0.120071496 |
| 12,450 | <i>LBX2</i>         | -0.119995457 |
| 12,451 | <i>C9ORF91</i>      | -0.11987908  |
| 12,452 | <i>GNGT1</i>        | -0.119534739 |
| 12,453 | <i>ALS2CR12</i>     | -0.119399087 |
| 12,454 | <i>NPR2</i>         | -0.119305288 |
| 12,455 | <i>DKFZP7620076</i> | -0.119292827 |
| 12,456 | <i>CWF19L1</i>      | -0.119002276 |
| 12,457 | <i>FLJ25660</i>     | -0.118842119 |
| 12,458 | <i>RBM29</i>        | -0.118828981 |
| 12,459 | <i>DENND3</i>       | -0.118783698 |
| 12,460 | <i>CSF2</i>         | -0.118686427 |
| 12,461 | <i>SMAD1</i>        | -0.118626649 |
| 12,462 | <i>NTE</i>          | -0.118615538 |
| 12,463 | <i>FLJ13611</i>     | -0.118600776 |
| 12,464 | <i>NRK</i>          | -0.117769963 |
| 12,465 | <i>RNGTT</i>        | -0.117732563 |
| 12,466 | <i>HCK</i>          | -0.117529386 |
| 12,467 | <i>CRHBP</i>        | -0.117386642 |
| 12,468 | <i>TM4SF7</i>       | -0.117004069 |
| 12,469 | <i>NPPB</i>         | -0.116891588 |
| 12,470 | <i>EFCBP1</i>       | -0.116797712 |
| 12,471 | <i>P66ALPHA</i>     | -0.116795974 |
| 12,472 | <i>OAT</i>          | -0.116675231 |
| 12,473 | <i>C14ORF54</i>     | -0.116451844 |
| 12,474 | <i>ADRA2B</i>       | -0.116415304 |
| 12,475 | <i>RNF40</i>        | -0.116251097 |
| 12,476 | <i>NID2</i>         | -0.116232788 |
| 12,477 | <i>VGLL4</i>        | -0.11622407  |
| 12,478 | <i>CYP17A1</i>      | -0.116202799 |
| 12,479 | <i>TTC6</i>         | -0.115720911 |
| 12,480 | <i>SDCCAG8</i>      | -0.115707881 |
| 12,481 | <i>ZBED4</i>        | -0.115617926 |
| 12,482 | <i>LRRIQ2</i>       | -0.115377426 |
| 12,483 | <i>PIK3CA</i>       | -0.115358839 |
| 12,484 | <i>C9ORF97</i>      | -0.115174358 |
| 12,485 | <i>POLB</i>         | -0.115062407 |
| 12,486 | <i>TMED7</i>        | -0.115002428 |
| 12,487 | <i>FOLH1</i>        | -0.114974429 |
| 12,488 | <i>ABCA12</i>       | -0.114805077 |
| 12,489 | <i>MASTL</i>        | -0.11469921  |
| 12,490 | <i>ESRRBL1</i>      | -0.114545078 |
| 12,491 | <i>STK33</i>        | -0.114475482 |
| 12,492 | <i>ZNF554</i>       | -0.114283516 |

|        |                  |              |
|--------|------------------|--------------|
| 12,493 | <i>EZI</i>       | -0.114159634 |
| 12,494 | <i>PARVG</i>     | -0.113927    |
| 12,495 | <i>C10ORF72</i>  | -0.113599841 |
| 12,496 | <i>NFE2L2</i>    | -0.113588694 |
| 12,497 | <i>FUNDC1</i>    | -0.113435348 |
| 12,498 | <i>EXTL1</i>     | -0.113355364 |
| 12,499 | <i>HRASLS</i>    | -0.113349648 |
| 12,500 | <i>ABCA6</i>     | -0.113293045 |
| 12,501 | <i>RNF128</i>    | -0.113067682 |
| 12,502 | <i>RNASE4</i>    | -0.113052639 |
| 12,503 | <i>TRIM16</i>    | -0.11275645  |
| 12,504 | <i>OR13C3</i>    | -0.112699007 |
| 12,505 | <i>CA7</i>       | -0.112465023 |
| 12,506 | <i>C16ORF34</i>  | -0.112450117 |
| 12,507 | <i>PRKWNK3</i>   | -0.112185773 |
| 12,508 | <i>LOC338879</i> | -0.111963125 |
| 12,509 | <i>SPSB3</i>     | -0.111525525 |
| 12,510 | <i>SCNN1D</i>    | -0.111524919 |
| 12,511 | <i>PBEF1</i>     | -0.111482226 |
| 12,512 | <i>HRMT1L1</i>   | -0.111437632 |
| 12,513 | <i>BRPF1</i>     | -0.111308511 |
| 12,514 | <i>PPP2R3A</i>   | -0.111102275 |
| 12,515 | <i>SLC20A2</i>   | -0.110852067 |
| 12,516 | <i>MGC13272</i>  | -0.110666786 |
| 12,517 | <i>ENPP5</i>     | -0.110665815 |
| 12,518 | <i>SLC22A4</i>   | -0.110455939 |
| 12,519 | <i>ZFH4</i>      | -0.110375494 |
| 12,520 | <i>ZNF253</i>    | -0.110318542 |
| 12,521 | <i>DCX</i>       | -0.110312896 |
| 12,522 | <i>SLC22A12</i>  | -0.110306009 |
| 12,523 | <i>PSENN</i>     | -0.109835658 |
| 12,524 | <i>RBBP8</i>     | -0.109705396 |
| 12,525 | <i>POTE15</i>    | -0.109439828 |
| 12,526 | <i>ARRDC2</i>    | -0.109357506 |
| 12,527 | <i>IARS</i>      | -0.109238072 |
| 12,528 | <i>WDR40A</i>    | -0.109144997 |
| 12,529 | <i>PRAME</i>     | -0.108957581 |
| 12,530 | <i>C5ORF13</i>   | -0.10872992  |
| 12,531 | <i>FLJ21986</i>  | -0.108566688 |
| 12,532 | <i>SIX6</i>      | -0.108520976 |
| 12,533 | <i>MYH6</i>      | -0.108459753 |
| 12,534 | <i>NPY5R</i>     | -0.10840349  |
| 12,535 | <i>LOC146206</i> | -0.108094996 |
| 12,536 | <i>IRF2</i>      | -0.10728301  |
| 12,537 | <i>IRX5</i>      | -0.106998721 |
| 12,538 | <i>CCL4L2</i>    | -0.106854995 |
| 12,539 | <i>LOC401335</i> | -0.106763093 |

|        |                  |              |
|--------|------------------|--------------|
| 12,540 | <i>DCST1</i>     | -0.106570617 |
| 12,541 | <i>DCST1</i>     | -0.106570617 |
| 12,542 | <i>EXOSC7</i>    | -0.106162006 |
| 12,543 | <i>LOC162993</i> | -0.106127204 |
| 12,544 | <i>OR8U8</i>     | -0.105633448 |
| 12,545 | <i>GPR34</i>     | -0.105573619 |
| 12,546 | <i>SLA</i>       | -0.105283746 |
| 12,547 | <i>ZNF21</i>     | -0.105049398 |
| 12,548 | <i>CDS1</i>      | -0.104930196 |
| 12,549 | <i>GNG13</i>     | -0.104918375 |
| 12,550 | <i>OR56B1</i>    | -0.104489255 |
| 12,551 | <i>IPO11</i>     | -0.104460147 |
| 12,552 | <i>FLJ32734</i>  | -0.104293321 |
| 12,553 | <i>SLAMF8</i>    | -0.104162045 |
| 12,554 | <i>UBE2J2</i>    | -0.10415648  |
| 12,555 | <i>C9ORF74</i>   | -0.104147766 |
| 12,556 | <i>PDGFA</i>     | -0.104077204 |
| 12,557 | <i>PDE5A</i>     | -0.104074122 |
| 12,558 | <i>C9ORF39</i>   | -0.103997768 |
| 12,559 | <i>DLG4</i>      | -0.103971691 |
| 12,560 | <i>SLC17A2</i>   | -0.103790021 |
| 12,561 | <i>TNRC6</i>     | -0.10366806  |
| 12,562 | <i>NDUFAF1</i>   | -0.103592802 |
| 12,563 | <i>FLJ12975</i>  | -0.103545666 |
| 12,564 | <i>C20ORF35</i>  | -0.103271238 |
| 12,565 | <i>OR4P4</i>     | -0.102974191 |
| 12,566 | <i>MRAP</i>      | -0.102927494 |
| 12,567 | <i>DACH2</i>     | -0.102342431 |
| 12,568 | <i>OR4N4</i>     | -0.102184955 |
| 12,569 | <i>ST8SIA4</i>   | -0.102046919 |
| 12,570 | <i>NAT2</i>      | -0.10194403  |
| 12,571 | <i>FLJ32752</i>  | -0.101685988 |
| 12,572 | <i>OAZ1</i>      | -0.101684451 |
| 12,573 | <i>GM117</i>     | -0.10138462  |
| 12,574 | <i>KIAA1841</i>  | -0.101212644 |
| 12,575 | <i>POFUT1</i>    | -0.101137407 |
| 12,576 | <i>ARHGAP17</i>  | -0.100659384 |
| 12,577 | <i>NCOR1</i>     | -0.100415601 |
| 12,578 | <i>C7ORF23</i>   | -0.100180137 |
| 12,579 | <i>NMT1</i>      | -0.100036432 |
| 12,580 | <i>HSPA4</i>     | -0.099738368 |
| 12,581 | <i>ELAC1</i>     | -0.099423192 |
| 12,582 | <i>TSGA13</i>    | -0.099391121 |
| 12,583 | <i>GMPPA</i>     | -0.099278094 |
| 12,584 | <i>CNOT8</i>     | -0.099105178 |
| 12,585 | <i>LOC284009</i> | -0.098863152 |
| 12,586 | <i>FLJ12586</i>  | -0.098777676 |

|        |                  |              |
|--------|------------------|--------------|
| 12,587 | <i>SDPR</i>      | -0.098749969 |
| 12,588 | <i>FLJ35808</i>  | -0.098602197 |
| 12,589 | <i>KIAA1715</i>  | -0.09835246  |
| 12,590 | <i>LOC387601</i> | -0.098350848 |
| 12,591 | <i>HNRPL</i>     | -0.098041049 |
| 12,592 | <i>ZMYND19</i>   | -0.097875321 |
| 12,593 | <i>H2AFY</i>     | -0.097766529 |
| 12,594 | <i>FLJ14011</i>  | -0.097602964 |
| 12,595 | <i>ABCC3</i>     | -0.097596884 |
| 12,596 | <i>PHOSPHO2</i>  | -0.097534363 |
| 12,597 | <i>DNM3</i>      | -0.097377937 |
| 12,598 | <i>VEZATIN</i>   | -0.096914829 |
| 12,599 | <i>MX2</i>       | -0.096713744 |
| 12,600 | <i>NRF</i>       | -0.096444533 |
| 12,601 | <i>DNAH8</i>     | -0.096384583 |
| 12,602 | <i>PTGS1</i>     | -0.096129781 |
| 12,603 | <i>C15ORF2</i>   | -0.095722395 |
| 12,604 | <i>LMO6</i>      | -0.095720548 |
| 12,605 | <i>PAIP2</i>     | -0.095557023 |
| 12,606 | <i>LOC90288</i>  | -0.095167431 |
| 12,607 | <i>IBRDC3</i>    | -0.094849616 |
| 12,608 | <i>OSBPL1A</i>   | -0.094574111 |
| 12,609 | <i>OR52A1</i>    | -0.094422482 |
| 12,610 | <i>COLEC11</i>   | -0.094422482 |
| 12,611 | <i>PUS3</i>      | -0.094174214 |
| 12,612 | <i>CALML3</i>    | -0.094067865 |
| 12,613 | <i>SEPT9</i>     | -0.093969728 |
| 12,614 | <i>RPS23</i>     | -0.093928077 |
| 12,615 | <i>FADS3</i>     | -0.093515473 |
| 12,616 | <i>ART5</i>      | -0.093496713 |
| 12,617 | <i>NTRK3</i>     | -0.093242448 |
| 12,618 | <i>HCG9</i>      | -0.093228182 |
| 12,619 | <i>MOGAT3</i>    | -0.093190598 |
| 12,620 | <i>GOLPH4</i>    | -0.092812114 |
| 12,621 | <i>FLJ12571</i>  | -0.092405417 |
| 12,622 | <i>FLJ14825</i>  | -0.092361551 |
| 12,623 | <i>DLX2</i>      | -0.091643177 |
| 12,624 | <i>HGNT-IV-H</i> | -0.091611711 |
| 12,625 | <i>WFDC5</i>     | -0.091542805 |
| 12,626 | <i>IL1F10</i>    | -0.091379167 |
| 12,627 | <i>GABRR2</i>    | -0.091186923 |
| 12,628 | <i>HCG3</i>      | -0.09090857  |
| 12,629 | <i>LDB3</i>      | -0.090700731 |
| 12,630 | <i>STYK1</i>     | -0.090665684 |
| 12,631 | <i>JDP2</i>      | -0.090217129 |
| 12,632 | <i>SBF1</i>      | -0.090140925 |
| 12,633 | <i>FLJ21749</i>  | -0.090094625 |

|        |                     |              |
|--------|---------------------|--------------|
| 12,634 | <i>ITCH</i>         | -0.090055295 |
| 12,635 | <i>FLJ30469</i>     | -0.090019153 |
| 12,636 | <i>COPS5</i>        | -0.089797146 |
| 12,637 | <i>MAT1A</i>        | -0.089720883 |
| 12,638 | <i>GEMIN6</i>       | -0.089318122 |
| 12,639 | <i>APOM</i>         | -0.089294925 |
| 12,640 | <i>ALG6</i>         | -0.089222091 |
| 12,641 | <i>KIAA1449</i>     | -0.089162301 |
| 12,642 | <i>ARL1</i>         | -0.088963906 |
| 12,643 | <i>RARS</i>         | -0.088939544 |
| 12,644 | <i>DGCR2</i>        | -0.088641558 |
| 12,645 | <i>ITGA9</i>        | -0.088351663 |
| 12,646 | <i>C6ORF154</i>     | -0.088267937 |
| 12,647 | <i>NDST3</i>        | -0.087833383 |
| 12,648 | <i>LOC283130</i>    | -0.087782584 |
| 12,649 | <i>FLJ45455</i>     | -0.087760486 |
| 12,650 | <i>TIMM8B</i>       | -0.087552974 |
| 12,651 | <i>DEK</i>          | -0.087339944 |
| 12,652 | <i>C9ORF11</i>      | -0.087283054 |
| 12,653 | <i>ASS</i>          | -0.087253558 |
| 12,654 | <i>IL7R</i>         | -0.086615217 |
| 12,655 | <i>LYPD2</i>        | -0.086538546 |
| 12,656 | <i>LYPD2</i>        | -0.086538546 |
| 12,657 | <i>M6PRBP1</i>      | -0.086470462 |
| 12,658 | <i>RHOU</i>         | -0.086391577 |
| 12,659 | <i>PCDHA12</i>      | -0.085914464 |
| 12,660 | <i>SH3MD2</i>       | -0.08588517  |
| 12,661 | <i>FIGLA</i>        | -0.085869564 |
| 12,662 | <i>MGC13096</i>     | -0.085239922 |
| 12,663 | <i>ZNF131</i>       | -0.085232612 |
| 12,664 | <i>KRTAP3-3</i>     | -0.085132965 |
| 12,665 | <i>KIF5A</i>        | -0.085056729 |
| 12,666 | <i>TFDP1</i>        | -0.084759371 |
| 12,667 | <i>SYNCOILIN</i>    | -0.084336883 |
| 12,668 | <i>GBA2</i>         | -0.084328057 |
| 12,669 | <i>WISP2</i>        | -0.084265058 |
| 12,670 | <i>MGC33637</i>     | -0.084114022 |
| 12,671 | <i>DLST</i>         | -0.084071171 |
| 12,672 | <i>PRDM14</i>       | -0.083919826 |
| 12,673 | <i>ARID3C</i>       | -0.083917762 |
| 12,674 | <i>LRRC39</i>       | -0.083890615 |
| 12,675 | <i>LTA</i>          | -0.083509203 |
| 12,676 | <i>GALNAC4S-6ST</i> | -0.083493964 |
| 12,677 | <i>MRPS23</i>       | -0.083395628 |
| 12,678 | <i>TLE2</i>         | -0.082610461 |
| 12,679 | <i>EPS8L3</i>       | -0.082366949 |
| 12,680 | <i>PTDSR</i>        | -0.082199038 |

|        |                  |              |
|--------|------------------|--------------|
| 12,681 | <i>MUC16</i>     | -0.081963421 |
| 12,682 | <i>OR2B3</i>     | -0.081952203 |
| 12,683 | <i>NR2F6</i>     | -0.081922756 |
| 12,684 | <i>GLO1</i>      | -0.081643832 |
| 12,685 | <i>LMTK3</i>     | -0.081525342 |
| 12,686 | <i>ITGB4BP</i>   | -0.081334471 |
| 12,687 | <i>IFNA8</i>     | -0.081151441 |
| 12,688 | <i>PCBP2</i>     | -0.080949671 |
| 12,689 | <i>MRPL48</i>    | -0.080754551 |
| 12,690 | <i>RP26</i>      | -0.080712347 |
| 12,691 | <i>BIRC4</i>     | -0.080689665 |
| 12,692 | <i>ZNF342</i>    | -0.080681439 |
| 12,693 | <i>MYO7B</i>     | -0.080565005 |
| 12,694 | <i>CCL20</i>     | -0.080482834 |
| 12,695 | <i>IRS1</i>      | -0.080294459 |
| 12,696 | <i>MR-1</i>      | -0.07990621  |
| 12,697 | <i>SULT1A3</i>   | -0.079900491 |
| 12,698 | <i>MAP1B</i>     | -0.079797773 |
| 12,699 | <i>FLJ31846</i>  | -0.079657112 |
| 12,700 | <i>C20ORF161</i> | -0.079490928 |
| 12,701 | <i>PLCL1</i>     | -0.079301471 |
| 12,702 | <i>LOC112869</i> | -0.079058401 |
| 12,703 | <i>MYLIP</i>     | -0.078888556 |
| 12,704 | <i>PTPRO</i>     | -0.078751072 |
| 12,705 | <i>FLJ43505</i>  | -0.078602883 |
| 12,706 | <i>KIF13B</i>    | -0.078465472 |
| 12,707 | <i>RANBP2</i>    | -0.078368282 |
| 12,708 | <i>CDGAP</i>     | -0.078280945 |
| 12,709 | <i>GPRC5C</i>    | -0.078162057 |
| 12,710 | <i>ZNF435</i>    | -0.078089926 |
| 12,711 | <i>IL1R2</i>     | -0.077973474 |
| 12,712 | <i>GZMB</i>      | -0.077594484 |
| 12,713 | <i>LOC130951</i> | -0.077388619 |
| 12,714 | <i>LAMA5</i>     | -0.077300949 |
| 12,715 | <i>CNTNAP3</i>   | -0.077188852 |
| 12,716 | <i>NAPSA</i>     | -0.077131234 |
| 12,717 | <i>CTNND1</i>    | -0.076923599 |
| 12,718 | <i>LOC340204</i> | -0.076864049 |
| 12,719 | <i>SLC14A1</i>   | -0.076816234 |
| 12,720 | <i>GJB6</i>      | -0.076783989 |
| 12,721 | <i>SPACA1</i>    | -0.076515616 |
| 12,722 | <i>NOPD1</i>     | -0.076437432 |
| 12,723 | <i>LXN</i>       | -0.075604119 |
| 12,724 | <i>CSGLCA-T</i>  | -0.075497647 |
| 12,725 | <i>KRTAP5-4</i>  | -0.075432171 |
| 12,726 | <i>LGR8</i>      | -0.075414882 |
| 12,727 | <i>PLP2</i>      | -0.075028251 |

|        |                  |              |
|--------|------------------|--------------|
| 12,728 | <i>FLJ11046</i>  | -0.074984609 |
| 12,729 | <i>C10ORF27</i>  | -0.07494164  |
| 12,730 | <i>EIF2B4</i>    | -0.074818303 |
| 12,731 | <i>C6ORF195</i>  | -0.074355574 |
| 12,732 | <i>MGC15730</i>  | -0.074343506 |
| 12,733 | <i>CHST6</i>     | -0.074266646 |
| 12,734 | <i>SHANK2</i>    | -0.074182182 |
| 12,735 | <i>HLA-DMB</i>   | -0.07337102  |
| 12,736 | <i>C4A</i>       | -0.073127996 |
| 12,737 | <i>MGC4308</i>   | -0.07311129  |
| 12,738 | <i>MAP4K4</i>    | -0.0730857   |
| 12,739 | <i>THRAP3</i>    | -0.072629022 |
| 12,740 | <i>JUB</i>       | -0.072394588 |
| 12,741 | <i>TRIM8</i>     | -0.072195262 |
| 12,742 | <i>SLC30A10</i>  | -0.072183399 |
| 12,743 | <i>BIRC8</i>     | -0.071684122 |
| 12,744 | <i>SYNGR4</i>    | -0.071381283 |
| 12,745 | <i>EAF2</i>      | -0.070759689 |
| 12,746 | <i>FBN1</i>      | -0.070630928 |
| 12,747 | <i>OR10R2</i>    | -0.070610427 |
| 12,748 | <i>RGPD7</i>     | -0.070146411 |
| 12,749 | <i>RPL7L1</i>    | -0.069863771 |
| 12,750 | <i>GFI1B</i>     | -0.069770191 |
| 12,751 | <i>FKSG24</i>    | -0.069682272 |
| 12,752 | <i>TNFSF18</i>   | -0.06916341  |
| 12,753 | <i>ECH1</i>      | -0.068791391 |
| 12,754 | <i>B3GTL</i>     | -0.068768408 |
| 12,755 | <i>LOC283116</i> | -0.068739779 |
| 12,756 | <i>CYP2U1</i>    | -0.068668955 |
| 12,757 | <i>ZNF561</i>    | -0.068264941 |
| 12,758 | <i>IL17C</i>     | -0.068260563 |
| 12,759 | <i>ATP5G1</i>    | -0.068200929 |
| 12,760 | <i>CINP</i>      | -0.068174491 |
| 12,761 | <i>SLC8A1</i>    | -0.068133334 |
| 12,762 | <i>PHKB</i>      | -0.068001455 |
| 12,763 | <i>ADAMTS1</i>   | -0.067425038 |
| 12,764 | <i>IDH3B</i>     | -0.067306669 |
| 12,765 | <i>CMYA3</i>     | -0.066764574 |
| 12,766 | <i>MGC40397</i>  | -0.066361831 |
| 12,767 | <i>SLITRK5</i>   | -0.06631671  |
| 12,768 | <i>ROPN1</i>     | -0.065952875 |
| 12,769 | <i>CDC25C</i>    | -0.065841697 |
| 12,770 | <i>CKB</i>       | -0.065478929 |
| 12,771 | <i>CCL23</i>     | -0.065464831 |
| 12,772 | <i>KIAA1305</i>  | -0.065210782 |
| 12,773 | <i>VNN2</i>      | -0.065192433 |
| 12,774 | <i>WWP2</i>      | -0.065047699 |



|        |                      |              |
|--------|----------------------|--------------|
| 12,775 | <i>C9ORF24</i>       | -0.064820444 |
| 12,776 | <i>ZNF503</i>        | -0.064748955 |
| 12,777 | <i>EHF</i>           | -0.064743498 |
| 12,778 | <i>NCOA5</i>         | -0.064450587 |
| 12,779 | <i>FLJ37970</i>      | -0.064431648 |
| 12,780 | <i>KCNA10</i>        | -0.064340922 |
| 12,781 | <i>CGA</i>           | -0.063759644 |
| 12,782 | <i>COL5A2</i>        | -0.063609367 |
| 12,783 | <i>FANCL</i>         | -0.063265346 |
| 12,784 | <i>CLDN18</i>        | -0.06287519  |
| 12,785 | <i>TAC3</i>          | -0.062858726 |
| 12,786 | <i>RHOA</i>          | -0.062750158 |
| 12,787 | <i>FLJ37874</i>      | -0.062465897 |
| 12,788 | <i>MPP5</i>          | -0.062419292 |
| 12,789 | <i>ZNF346</i>        | -0.062209624 |
| 12,790 | <i>CTEN</i>          | -0.062001976 |
| 12,791 | <i>LGTN</i>          | -0.061926022 |
| 12,792 | <i>TRMT1</i>         | -0.061892223 |
| 12,793 | <i>DNAH7</i>         | -0.061832722 |
| 12,794 | <i>SNX22</i>         | -0.061555124 |
| 12,795 | <i>OR5W2</i>         | -0.061177039 |
| 12,796 | <i>ZBTB26</i>        | -0.061146788 |
| 12,797 | <i>DGUOK</i>         | -0.061083163 |
| 12,798 | <i>NDUFS6</i>        | -0.060810649 |
| 12,799 | <i>CTTN</i>          | -0.060705712 |
| 12,800 | <i>GP5</i>           | -0.059970434 |
| 12,801 | <i>HADHA</i>         | -0.05973653  |
| 12,802 | <i>MARCH9</i>        | -0.05928101  |
| 12,803 | <i>FAM36A</i>        | -0.059229827 |
| 12,804 | <i>GPR55</i>         | -0.059094764 |
| 12,805 | <i>ENPP4</i>         | -0.058835268 |
| 12,806 | <i>NRAS</i>          | -0.058730528 |
| 12,807 | <i>XK</i>            | -0.058215862 |
| 12,808 | <i>B3GALT3</i>       | -0.058167612 |
| 12,809 | <i>SSBP3</i>         | -0.058139367 |
| 12,810 | <i>SF3A1</i>         | -0.058099113 |
| 12,811 | <i>NDP52</i>         | -0.058041837 |
| 12,812 | <i>HMGB1</i>         | -0.057652365 |
| 12,813 | <i>CST6</i>          | -0.057581174 |
| 12,814 | <i>HTR3B</i>         | -0.05748642  |
| 12,815 | <i>DKFZP564O0523</i> | -0.057101286 |
| 12,816 | <i>SCAMP1</i>        | -0.056907538 |
| 12,817 | <i>POP5</i>          | -0.056784181 |
| 12,818 | <i>GBGT1</i>         | -0.056771367 |
| 12,819 | <i>ATIC</i>          | -0.056053239 |
| 12,820 | <i>ARL11</i>         | -0.056040944 |
| 12,821 | <i>TDRD7</i>         | -0.055561448 |

|        |                  |              |
|--------|------------------|--------------|
| 12,822 | <i>NUPL2</i>     | -0.054912758 |
| 12,823 | <i>C15ORF21</i>  | -0.054628115 |
| 12,824 | <i>NDUFB11</i>   | -0.054160739 |
| 12,825 | <i>DHFRL1</i>    | -0.054155015 |
| 12,826 | <i>LOC414059</i> | -0.053886506 |
| 12,827 | <i>LOC92346</i>  | -0.053803814 |
| 12,828 | <i>C14ORF135</i> | -0.053347629 |
| 12,829 | <i>FLJ36779</i>  | -0.053343093 |
| 12,830 | <i>TIP120A</i>   | -0.053306752 |
| 12,831 | <i>HOXA5</i>     | -0.053111709 |
| 12,832 | <i>HIST1H4D</i>  | -0.052965424 |
| 12,833 | <i>LOC199675</i> | -0.052554643 |
| 12,834 | <i>SKIP</i>      | -0.052115667 |
| 12,835 | <i>LOC84661</i>  | -0.051958616 |
| 12,836 | <i>SCEL</i>      | -0.051807554 |
| 12,837 | <i>VAPB</i>      | -0.051682913 |
| 12,838 | <i>FMO2</i>      | -0.0515028   |
| 12,839 | <i>KLK4</i>      | -0.051068047 |
| 12,840 | <i>OR4D11</i>    | -0.050932246 |
| 12,841 | <i>ZNF571</i>    | -0.050860404 |
| 12,842 | <i>GPHA2</i>     | -0.050854344 |
| 12,843 | <i>CDY1</i>      | -0.050853401 |
| 12,844 | <i>PPP2R5E</i>   | -0.05064113  |
| 12,845 | <i>AMY1C</i>     | -0.05026499  |
| 12,846 | <i>TMEM35</i>    | -0.050122406 |
| 12,847 | <i>LOC389158</i> | -0.050102855 |
| 12,848 | <i>MGC26999</i>  | -0.050016826 |
| 12,849 | <i>RAMP</i>      | -0.050005985 |
| 12,850 | <i>CNNM1</i>     | -0.049670911 |
| 12,851 | <i>HDAC2</i>     | -0.049360054 |
| 12,852 | <i>OR1C1</i>     | -0.04855408  |
| 12,853 | <i>KIAA0992</i>  | -0.048194722 |
| 12,854 | <i>ITGB4</i>     | -0.047737745 |
| 12,855 | <i>OR1D4</i>     | -0.047527636 |
| 12,856 | <i>LOC389549</i> | -0.047374275 |
| 12,857 | <i>PRND</i>      | -0.047327244 |
| 12,858 | <i>CABP5</i>     | -0.047317184 |
| 12,859 | <i>PRKCE</i>     | -0.0472826   |
| 12,860 | <i>SLC39A7</i>   | -0.047184021 |
| 12,861 | <i>OR10AD1</i>   | -0.046902784 |
| 12,862 | <i>DEFB130</i>   | -0.046880126 |
| 12,863 | <i>NOMO3</i>     | -0.046846338 |
| 12,864 | <i>TMEM16D</i>   | -0.04649745  |
| 12,865 | <i>CA4</i>       | -0.046392369 |
| 12,866 | <i>CHL1</i>      | -0.046332722 |
| 12,867 | <i>PIB5PA</i>    | -0.04577773  |
| 12,868 | <i>HYAL1</i>     | -0.045676431 |

|        |                      |              |
|--------|----------------------|--------------|
| 12,869 | <i>TIRP</i>          | -0.045628328 |
| 12,870 | <i>HTR1F</i>         | -0.045597371 |
| 12,871 | <i>MGC15523</i>      | -0.045374725 |
| 12,872 | <i>CLDN11</i>        | -0.044906284 |
| 12,873 | <i>AMOTL2</i>        | -0.044448567 |
| 12,874 | <i>EGFL7</i>         | -0.044355031 |
| 12,875 | <i>SLC16A8</i>       | -0.044298589 |
| 12,876 | <i>FSCN2</i>         | -0.044038792 |
| 12,877 | <i>UNQ2754</i>       | -0.043802668 |
| 12,878 | <i>AREG</i>          | -0.043477224 |
| 12,879 | <i>LOC222171</i>     | -0.043152145 |
| 12,880 | <i>BGLAP</i>         | -0.042908177 |
| 12,881 | <i>KIAA1623</i>      | -0.042277465 |
| 12,882 | <i>C6ORF49</i>       | -0.042233431 |
| 12,883 | <i>ADARB1</i>        | -0.04207861  |
| 12,884 | <i>ZNF564</i>        | -0.041666707 |
| 12,885 | <i>ZNF564</i>        | -0.041666707 |
| 12,886 | <i>DKFZP434B0335</i> | -0.041302904 |
| 12,887 | <i>RFT1</i>          | -0.041182253 |
| 12,888 | <i>RBPSUHL</i>       | -0.041003483 |
| 12,889 | <i>BTN3A1</i>        | -0.04086022  |
| 12,890 | <i>ATP6V1F</i>       | -0.040792684 |
| 12,891 | <i>KIAA1900</i>      | -0.040244598 |
| 12,892 | <i>RAB5A</i>         | -0.040219862 |
| 12,893 | <i>SEC22L2</i>       | -0.040106912 |
| 12,894 | <i>RGS11</i>         | -0.039900315 |
| 12,895 | <i>RPP40</i>         | -0.039778891 |
| 12,896 | <i>LOC120379</i>     | -0.039646556 |
| 12,897 | <i>KIAA0690</i>      | -0.039442124 |
| 12,898 | <i>IL20RA</i>        | -0.038999376 |
| 12,899 | <i>COX5A</i>         | -0.038904036 |
| 12,900 | <i>LOC127253</i>     | -0.038837183 |
| 12,901 | <i>ZNF575</i>        | -0.038816507 |
| 12,902 | <i>KIAA0522</i>      | -0.038740821 |
| 12,903 | <i>SUSD3</i>         | -0.038677825 |
| 12,904 | <i>SLRN</i>          | -0.038661241 |
| 12,905 | <i>FZD10</i>         | -0.038176254 |
| 12,906 | <i>C9ORF85</i>       | -0.037924214 |
| 12,907 | <i>PSORS1C2</i>      | -0.037764797 |
| 12,908 | <i>CHST8</i>         | -0.037085324 |
| 12,909 | <i>HRAS</i>          | -0.037067393 |
| 12,910 | <i>MARCH6</i>        | -0.036709038 |
| 12,911 | <i>C10ORF91</i>      | -0.03665188  |
| 12,912 | <i>PHYHIP</i>        | -0.03638139  |
| 12,913 | <i>HDLBP</i>         | -0.036288774 |
| 12,914 | <i>ABHD5</i>         | -0.036184884 |
| 12,915 | <i>FRMD4</i>         | -0.035784329 |

|        |                  |              |
|--------|------------------|--------------|
| 12,916 | <i>S100A12</i>   | -0.035241314 |
| 12,917 | <i>RNASEL</i>    | -0.034828117 |
| 12,918 | <i>LOC51249</i>  | -0.034399819 |
| 12,919 | <i>TRIM25</i>    | -0.03411717  |
| 12,920 | <i>DOCK5</i>     | -0.033837991 |
| 12,921 | <i>SEC11L3</i>   | -0.033580283 |
| 12,922 | <i>KRTAP11-1</i> | -0.033210309 |
| 12,923 | <i>C6ORF128</i>  | -0.032971731 |
| 12,924 | <i>FLJ31882</i>  | -0.032810357 |
| 12,925 | <i>FKBP2</i>     | -0.032718437 |
| 12,926 | <i>CHD8</i>      | -0.032644045 |
| 12,927 | <i>HIST1H4L</i>  | -0.032244721 |
| 12,928 | <i>PPP2R5D</i>   | -0.032192261 |
| 12,929 | <i>PHGDH</i>     | -0.031761919 |
| 12,930 | <i>GRIA4</i>     | -0.031713494 |
| 12,931 | <i>SQSTM1</i>    | -0.031657243 |
| 12,932 | <i>TNIP1</i>     | -0.031589723 |
| 12,933 | <i>PXT1</i>      | -0.03151622  |
| 12,934 | <i>CNO</i>       | -0.031450169 |
| 12,935 | <i>TGM2</i>      | -0.030891314 |
| 12,936 | <i>MUSK</i>      | -0.030825153 |
| 12,937 | <i>OR5U1</i>     | -0.030590645 |
| 12,938 | <i>ELF2</i>      | -0.030371918 |
| 12,939 | <i>MGC14376</i>  | -0.030191519 |
| 12,940 | <i>DGKE</i>      | -0.029892476 |
| 12,941 | <i>ARHGAP12</i>  | -0.029788373 |
| 12,942 | <i>SNFT</i>      | -0.029526141 |
| 12,943 | <i>ZNF490</i>    | -0.029479423 |
| 12,944 | <i>C6ORF15</i>   | -0.029452928 |
| 12,945 | <i>DSCR3</i>     | -0.02936576  |
| 12,946 | <i>TMEM4</i>     | -0.029199081 |
| 12,947 | <i>ARL2BP</i>    | -0.028751567 |
| 12,948 | <i>C1ORF8</i>    | -0.028714104 |
| 12,949 | <i>COL13A1</i>   | -0.028633142 |
| 12,950 | <i>CLCN2</i>     | -0.028149153 |
| 12,951 | <i>MGC119295</i> | -0.028112103 |
| 12,952 | <i>ASCC1</i>     | -0.027979515 |
| 12,953 | <i>OIT3</i>      | -0.027890002 |
| 12,954 | <i>PRTFDC1</i>   | -0.027734987 |
| 12,955 | <i>FLJ25415</i>  | -0.027646401 |
| 12,956 | <i>LOC641522</i> | -0.027515361 |
| 12,957 | <i>GABRG2</i>    | -0.02750414  |
| 12,958 | <i>SLC25A21</i>  | -0.027476835 |
| 12,959 | <i>HSPA1B</i>    | -0.027404116 |
| 12,960 | <i>C7ORF7</i>    | -0.026913936 |
| 12,961 | <i>AD-003</i>    | -0.026725619 |
| 12,962 | <i>ANG</i>       | -0.026599265 |

|        |                     |              |
|--------|---------------------|--------------|
| 12,963 | <i>PCK2</i>         | -0.026306782 |
| 12,964 | <i>HSU79274</i>     | -0.025975077 |
| 12,965 | <i>NUDC</i>         | -0.025737532 |
| 12,966 | <i>HCRT</i>         | -0.025729617 |
| 12,967 | <i>GAL3ST2</i>      | -0.025672915 |
| 12,968 | <i>FLJ20296</i>     | -0.025618542 |
| 12,969 | <i>CFHL3</i>        | -0.025341494 |
| 12,970 | <i>SLC25A18</i>     | -0.02488571  |
| 12,971 | <i>NUDT6</i>        | -0.024100739 |
| 12,972 | <i>KIAA1727</i>     | -0.023961455 |
| 12,973 | <i>GTPBP2</i>       | -0.02342104  |
| 12,974 | <i>HES7</i>         | -0.023237464 |
| 12,975 | <i>KRTAP1-3</i>     | -0.022924993 |
| 12,976 | <i>C1ORF34</i>      | -0.022914104 |
| 12,977 | <i>MDA5</i>         | -0.022856015 |
| 12,978 | <i>MPZ</i>          | -0.022798641 |
| 12,979 | <i>GTSE1</i>        | -0.022626625 |
| 12,980 | <i>PSCD4</i>        | -0.022568178 |
| 12,981 | <i>ECHDC3</i>       | -0.022502217 |
| 12,982 | <i>BLR1</i>         | -0.022453785 |
| 12,983 | <i>NALP8</i>        | -0.022225348 |
| 12,984 | <i>LANCL2</i>       | -0.022062579 |
| 12,985 | <i>DKFZP434M202</i> | -0.02201534  |
| 12,986 | <i>KIAA0831</i>     | -0.021892408 |
| 12,987 | <i>KBTBD3</i>       | -0.02165607  |
| 12,988 | <i>ASTN2</i>        | -0.021293332 |
| 12,989 | <i>ACVR1</i>        | -0.021192293 |
| 12,990 | <i>DOCK3</i>        | -0.020760148 |
| 12,991 | <i>KRTAP18-8</i>    | -0.02071646  |
| 12,992 | <i>RIT1</i>         | -0.020673027 |
| 12,993 | <i>LOC652591</i>    | -0.020470302 |
| 12,994 | <i>FLJ10415</i>     | -0.020325    |
| 12,995 | <i>RABGEF1</i>      | -0.019932461 |
| 12,996 | <i>MK2S4</i>        | -0.019329922 |
| 12,997 | <i>GABARAP</i>      | -0.019237206 |
| 12,998 | <i>TTID</i>         | -0.01923241  |
| 12,999 | <i>BHMT</i>         | -0.019219031 |
| 13,000 | <i>GPR110</i>       | -0.01864121  |
| 13,001 | <i>HSPA6</i>        | -0.018606079 |
| 13,002 | <i>IRF3</i>         | -0.018589439 |
| 13,003 | <i>MPP6</i>         | -0.018576414 |
| 13,004 | <i>CHAF1A</i>       | -0.018553177 |
| 13,005 | <i>DGCR8</i>        | -0.01837166  |
| 13,006 | <i>GTF3C3</i>       | -0.018237688 |
| 13,007 | <i>PDAP1</i>        | -0.018023986 |
| 13,008 | <i>FLJ10891</i>     | -0.017833473 |
| 13,009 | <i>IPP</i>          | -0.017812301 |

|        |                  |              |
|--------|------------------|--------------|
| 13,010 | <i>MAGEA1</i>    | -0.017732204 |
| 13,011 | <i>ADCK5</i>     | -0.017695465 |
| 13,012 | <i>MIDORI</i>    | -0.017601019 |
| 13,013 | <i>GRIA1</i>     | -0.017456131 |
| 13,014 | <i>GRID2</i>     | -0.017327263 |
| 13,015 | <i>PTPN3</i>     | -0.017260555 |
| 13,016 | <i>CA5A</i>      | -0.017160892 |
| 13,017 | <i>PGM5</i>      | -0.01699842  |
| 13,018 | <i>IL18BP</i>    | -0.016710989 |
| 13,019 | <i>MGC15737</i>  | -0.016643396 |
| 13,020 | <i>GJB3</i>      | -0.016608316 |
| 13,021 | <i>FLJ32370</i>  | -0.016429063 |
| 13,022 | <i>PHF20</i>     | -0.016415258 |
| 13,023 | <i>EDAR</i>      | -0.016342292 |
| 13,024 | <i>PLA2G2D</i>   | -0.016304746 |
| 13,025 | <i>FLJ32384</i>  | -0.015181504 |
| 13,026 | <i>OR12D2</i>    | -0.014972584 |
| 13,027 | <i>DNAJB2</i>    | -0.014959444 |
| 13,028 | <i>SYNJ2</i>     | -0.014699291 |
| 13,029 | <i>EFG2</i>      | -0.014666091 |
| 13,030 | <i>GNB1</i>      | -0.014526372 |
| 13,031 | <i>ARPC4</i>     | -0.014320387 |
| 13,032 | <i>TAP2</i>      | -0.014089615 |
| 13,033 | <i>EMILIN2</i>   | -0.013428162 |
| 13,034 | <i>CNN2</i>      | -0.013309554 |
| 13,035 | <i>SFRP2</i>     | -0.013014074 |
| 13,036 | <i>ACY-3</i>     | -0.012631849 |
| 13,037 | <i>COL4A3BP</i>  | -0.012588753 |
| 13,038 | <i>SYNPO2L</i>   | -0.012496029 |
| 13,039 | <i>GSK3A</i>     | -0.012025418 |
| 13,040 | <i>YAF2</i>      | -0.01202213  |
| 13,041 | <i>UNQ9341</i>   | -0.011732999 |
| 13,042 | <i>KBTBD5</i>    | -0.011612717 |
| 13,043 | <i>ZNF430</i>    | -0.01140658  |
| 13,044 | <i>GPA33</i>     | -0.011319333 |
| 13,045 | <i>C21ORF5</i>   | -0.011270585 |
| 13,046 | <i>CNTFR</i>     | -0.011194235 |
| 13,047 | <i>CENTA1</i>    | -0.010687856 |
| 13,048 | <i>TRPC1</i>     | -0.010075308 |
| 13,049 | <i>KIF5C</i>     | -0.009828556 |
| 13,050 | <i>FLJ32440</i>  | -0.009705226 |
| 13,051 | <i>CDH19</i>     | -0.009332617 |
| 13,052 | <i>NY-REN-41</i> | -0.008796088 |
| 13,053 | <i>RBM16</i>     | -0.008606558 |
| 13,054 | <i>ZPBP</i>      | -0.008362411 |
| 13,055 | <i>MCM4</i>      | -0.008308203 |
| 13,056 | <i>DIPA</i>      | -0.008191596 |

|        |                 |              |
|--------|-----------------|--------------|
| 13,057 | <i>MGC45562</i> | -0.008151626 |
| 13,058 | <i>PTGS2</i>    | -0.007904079 |
| 13,059 | <i>DMBX1</i>    | -0.006723379 |
| 13,060 | <i>MGC26594</i> | -0.006511269 |
| 13,061 | <i>SYNJ1</i>    | -0.00640502  |
| 13,062 | <i>CASP8</i>    | -0.006253884 |
| 13,063 | <i>C5ORF19</i>  | -0.006020685 |
| 13,064 | <i>DNAJC16</i>  | -0.005876074 |
| 13,065 | <i>DNAJC16</i>  | -0.005876074 |
| 13,066 | <i>GRPEL2</i>   | -0.005656367 |
| 13,067 | <i>AATK</i>     | -0.00565007  |
| 13,068 | <i>OR4D1</i>    | -0.0049698   |
| 13,069 | <i>MASS1</i>    | -0.004945955 |
| 13,070 | <i>F2RL3</i>    | -0.004600191 |
| 13,071 | <i>FLJ20366</i> | -0.004127263 |
| 13,072 | <i>MAS1L</i>    | -0.004101692 |
| 13,073 | <i>ZMYND17</i>  | -0.003823902 |
| 13,074 | <i>GABPB2</i>   | -0.003764251 |
| 13,075 | <i>KLRC2</i>    | -0.003556499 |
| 13,076 | <i>ISGF3G</i>   | -0.003425636 |
| 13,077 | <i>NTS</i>      | -0.003317716 |
| 13,078 | <i>FLJ13111</i> | -0.003215872 |
| 13,079 | <i>GSTA3</i>    | -0.00318561  |
| 13,080 | <i>AKAP3</i>    | -0.003059931 |
| 13,081 | <i>P2RX7</i>    | -0.002703655 |
| 13,082 | <i>TRIM14</i>   | -0.002631969 |
| 13,083 | <i>ACVR2</i>    | -0.001926572 |
| 13,084 | <i>NDUFA9</i>   | -0.00154425  |
| 13,085 | <i>PHF2</i>     | -0.001440887 |
| 13,086 | <i>SLC6A14</i>  | -0.001326374 |
| 13,087 | <i>ADAM9</i>    | -0.001205498 |
| 13,088 | <i>C6ORF158</i> | -0.001205498 |
| 13,089 | <i>SEC24C</i>   | -0.000764374 |
| 13,090 | <i>UBE2H</i>    | -0.000513805 |
| 13,091 | <i>CHD3</i>     | -0.000215661 |
| 13,092 | <i>TNFRSF8</i>  | -0.000215455 |
| 13,093 | <i>MAN2B2</i>   | -1.26813E-05 |
| 13,094 | <i>OTP-NT</i>   | 0            |
| 13,095 | <i>OTP-NT</i>   | 0            |
| 13,096 | <i>OTP-NT</i>   | 0            |
| 13,097 | <i>OTP-NT</i>   | 0            |
| 13,098 | <i>OTP-NT</i>   | 0            |
| 13,099 | <i>OTP-NT</i>   | 0            |
| 13,100 | <i>OTP-NT</i>   | 0            |
| 13,101 | <i>OTP-NT</i>   | 0            |
| 13,102 | <i>OTP-NT</i>   | 0            |
| 13,103 | <i>OTP-NT</i>   | 0            |

|        |        |   |
|--------|--------|---|
| 13,104 | OTP-NT | 0 |
| 13,105 | OTP-NT | 0 |
| 13,106 | OTP-NT | 0 |
| 13,107 | OTP-NT | 0 |
| 13,108 | OTP-NT | 0 |
| 13,109 | OTP-NT | 0 |
| 13,110 | OTP-NT | 0 |
| 13,111 | OTP-NT | 0 |
| 13,112 | OTP-NT | 0 |
| 13,113 | OTP-NT | 0 |
| 13,114 | OTP-NT | 0 |
| 13,115 | OTP-NT | 0 |
| 13,116 | OTP-NT | 0 |
| 13,117 | OTP-NT | 0 |
| 13,118 | OTP-NT | 0 |
| 13,119 | OTP-NT | 0 |
| 13,120 | OTP-NT | 0 |
| 13,121 | OTP-NT | 0 |
| 13,122 | OTP-NT | 0 |
| 13,123 | OTP-NT | 0 |
| 13,124 | OTP-NT | 0 |
| 13,125 | OTP-NT | 0 |
| 13,126 | OTP-NT | 0 |
| 13,127 | OTP-NT | 0 |
| 13,128 | OTP-NT | 0 |
| 13,129 | OTP-NT | 0 |
| 13,130 | OTP-NT | 0 |
| 13,131 | OTP-NT | 0 |
| 13,132 | OTP-NT | 0 |
| 13,133 | OTP-NT | 0 |
| 13,134 | OTP-NT | 0 |
| 13,135 | OTP-NT | 0 |
| 13,136 | OTP-NT | 0 |
| 13,137 | OTP-NT | 0 |
| 13,138 | OTP-NT | 0 |
| 13,139 | OTP-NT | 0 |
| 13,140 | OTP-NT | 0 |
| 13,141 | OTP-NT | 0 |
| 13,142 | OTP-NT | 0 |
| 13,143 | OTP-NT | 0 |
| 13,144 | OTP-NT | 0 |
| 13,145 | OTP-NT | 0 |
| 13,146 | OTP-NT | 0 |
| 13,147 | OTP-NT | 0 |
| 13,148 | OTP-NT | 0 |
| 13,149 | OTP-NT | 0 |
| 13,150 | OTP-NT | 0 |



|        |        |   |
|--------|--------|---|
| 13,151 | OTP-NT | 0 |
| 13,152 | OTP-NT | 0 |
| 13,153 | OTP-NT | 0 |
| 13,154 | OTP-NT | 0 |
| 13,155 | OTP-NT | 0 |
| 13,156 | OTP-NT | 0 |
| 13,157 | OTP-NT | 0 |
| 13,158 | OTP-NT | 0 |
| 13,159 | OTP-NT | 0 |
| 13,160 | OTP-NT | 0 |
| 13,161 | OTP-NT | 0 |
| 13,162 | OTP-NT | 0 |
| 13,163 | OTP-NT | 0 |
| 13,164 | OTP-NT | 0 |
| 13,165 | OTP-NT | 0 |
| 13,166 | OTP-NT | 0 |
| 13,167 | OTP-NT | 0 |
| 13,168 | OTP-NT | 0 |
| 13,169 | OTP-NT | 0 |
| 13,170 | OTP-NT | 0 |
| 13,171 | OTP-NT | 0 |
| 13,172 | OTP-NT | 0 |
| 13,173 | OTP-NT | 0 |
| 13,174 | OTP-NT | 0 |
| 13,175 | OTP-NT | 0 |
| 13,176 | OTP-NT | 0 |
| 13,177 | OTP-NT | 0 |
| 13,178 | OTP-NT | 0 |
| 13,179 | OTP-NT | 0 |
| 13,180 | OTP-NT | 0 |
| 13,181 | OTP-NT | 0 |
| 13,182 | OTP-NT | 0 |
| 13,183 | OTP-NT | 0 |
| 13,184 | OTP-NT | 0 |
| 13,185 | OTP-NT | 0 |
| 13,186 | OTP-NT | 0 |
| 13,187 | OTP-NT | 0 |
| 13,188 | OTP-NT | 0 |
| 13,189 | OTP-NT | 0 |
| 13,190 | OTP-NT | 0 |
| 13,191 | OTP-NT | 0 |
| 13,192 | OTP-NT | 0 |
| 13,193 | OTP-NT | 0 |
| 13,194 | OTP-NT | 0 |
| 13,195 | OTP-NT | 0 |
| 13,196 | OTP-NT | 0 |
| 13,197 | OTP-NT | 0 |

|        |        |   |
|--------|--------|---|
| 13,198 | OTP-NT | 0 |
| 13,199 | OTP-NT | 0 |
| 13,200 | OTP-NT | 0 |
| 13,201 | OTP-NT | 0 |
| 13,202 | OTP-NT | 0 |
| 13,203 | OTP-NT | 0 |
| 13,204 | OTP-NT | 0 |
| 13,205 | OTP-NT | 0 |
| 13,206 | OTP-NT | 0 |
| 13,207 | OTP-NT | 0 |
| 13,208 | OTP-NT | 0 |
| 13,209 | OTP-NT | 0 |
| 13,210 | OTP-NT | 0 |
| 13,211 | OTP-NT | 0 |
| 13,212 | OTP-NT | 0 |
| 13,213 | OTP-NT | 0 |
| 13,214 | OTP-NT | 0 |
| 13,215 | OTP-NT | 0 |
| 13,216 | OTP-NT | 0 |
| 13,217 | OTP-NT | 0 |
| 13,218 | OTP-NT | 0 |
| 13,219 | OTP-NT | 0 |
| 13,220 | OTP-NT | 0 |
| 13,221 | OTP-NT | 0 |
| 13,222 | OTP-NT | 0 |
| 13,223 | OTP-NT | 0 |
| 13,224 | OTP-NT | 0 |
| 13,225 | OTP-NT | 0 |
| 13,226 | OTP-NT | 0 |
| 13,227 | OTP-NT | 0 |
| 13,228 | OTP-NT | 0 |
| 13,229 | OTP-NT | 0 |
| 13,230 | OTP-NT | 0 |
| 13,231 | OTP-NT | 0 |
| 13,232 | OTP-NT | 0 |
| 13,233 | OTP-NT | 0 |
| 13,234 | OTP-NT | 0 |
| 13,235 | OTP-NT | 0 |
| 13,236 | OTP-NT | 0 |
| 13,237 | OTP-NT | 0 |
| 13,238 | OTP-NT | 0 |
| 13,239 | OTP-NT | 0 |
| 13,240 | OTP-NT | 0 |
| 13,241 | OTP-NT | 0 |
| 13,242 | OTP-NT | 0 |
| 13,243 | OTP-NT | 0 |
| 13,244 | OTP-NT | 0 |

|        |                      |             |
|--------|----------------------|-------------|
| 13,245 | <i>OTP-NT</i>        | 0           |
| 13,246 | <i>OTP-NT</i>        | 0           |
| 13,247 | <i>OTP-NT</i>        | 0           |
| 13,248 | <i>OTP-NT</i>        | 0           |
| 13,249 | <i>OTP-NT</i>        | 0           |
| 13,250 | <i>MYH2</i>          | 0.00035871  |
| 13,251 | <i>HADH2</i>         | 0.000417273 |
| 13,252 | <i>TPI1</i>          | 0.000423694 |
| 13,253 | <i>TXNDC5</i>        | 0.000459433 |
| 13,254 | <i>KIAA1889</i>      | 0.000782036 |
| 13,255 | <i>PROZ</i>          | 0.000955354 |
| 13,256 | <i>PROM2</i>         | 0.000984181 |
| 13,257 | <i>SLC16A4</i>       | 0.001358875 |
| 13,258 | <i>C9ORF37</i>       | 0.001615091 |
| 13,259 | <i>C18ORF8</i>       | 0.001668329 |
| 13,260 | <i>C9ORF76</i>       | 0.002044169 |
| 13,261 | <i>FLJ20200</i>      | 0.002321273 |
| 13,262 | <i>RGMB</i>          | 0.002762113 |
| 13,263 | <i>ALS2CR19</i>      | 0.00344248  |
| 13,264 | <i>GNG7</i>          | 0.003501772 |
| 13,265 | <i>LOC124976</i>     | 0.003515718 |
| 13,266 | <i>H6PD</i>          | 0.00354533  |
| 13,267 | <i>RGS20</i>         | 0.003690153 |
| 13,268 | <i>OXR1</i>          | 0.003782888 |
| 13,269 | <i>MLF2</i>          | 0.003867861 |
| 13,270 | <i>CLASP2</i>        | 0.003902008 |
| 13,271 | <i>CUBN</i>          | 0.004090622 |
| 13,272 | <i>CELSR2</i>        | 0.004459276 |
| 13,273 | <i>ECM2</i>          | 0.004758074 |
| 13,274 | <i>SALL1</i>         | 0.004856817 |
| 13,275 | <i>ZNF33A</i>        | 0.004866137 |
| 13,276 | <i>RILP</i>          | 0.005495946 |
| 13,277 | <i>SARDH</i>         | 0.005565432 |
| 13,278 | <i>HMGCR</i>         | 0.005825959 |
| 13,279 | <i>UBAP1</i>         | 0.005842097 |
| 13,280 | <i>ZA20D1</i>        | 0.006072689 |
| 13,281 | <i>ZNF473</i>        | 0.006100837 |
| 13,282 | <i>INHBB</i>         | 0.006305401 |
| 13,283 | <i>DKFZP434F0318</i> | 0.006387857 |
| 13,284 | <i>FUT5</i>          | 0.006627916 |
| 13,285 | <i>CSPG5</i>         | 0.006661361 |
| 13,286 | <i>DDX54</i>         | 0.006853787 |
| 13,287 | <i>C13ORF22</i>      | 0.0070366   |
| 13,288 | <i>FLJ10404</i>      | 0.007096473 |
| 13,289 | <i>LOC150084</i>     | 0.007324781 |
| 13,290 | <i>USHBP1</i>        | 0.007735706 |
| 13,291 | <i>GDPD2</i>         | 0.007777661 |

|        |                      |             |
|--------|----------------------|-------------|
| 13,292 | <i>IL1RL1LG</i>      | 0.007883231 |
| 13,293 | <i>CYB5R2</i>        | 0.007884968 |
| 13,294 | <i>PIGL</i>          | 0.007940054 |
| 13,295 | <i>USP29</i>         | 0.008106886 |
| 13,296 | <i>TLP</i>           | 0.008150779 |
| 13,297 | <i>FLJ20344</i>      | 0.008322116 |
| 13,298 | <i>SEZ6</i>          | 0.008799664 |
| 13,299 | <i>FLJ25811</i>      | 0.009066243 |
| 13,300 | <i>SLC25A26</i>      | 0.009506418 |
| 13,301 | <i>MOXD1</i>         | 0.009666808 |
| 13,302 | <i>RNF7</i>          | 0.009721658 |
| 13,303 | <i>DUSP22</i>        | 0.009750122 |
| 13,304 | <i>NYD-SP17</i>      | 0.010060858 |
| 13,305 | <i>TNFSF13B</i>      | 0.01007142  |
| 13,306 | <i>GOPC</i>          | 0.010175985 |
| 13,307 | <i>SH120</i>         | 0.010416328 |
| 13,308 | <i>MOSPD2</i>        | 0.010429511 |
| 13,309 | <i>RP11-444E17.5</i> | 0.010432808 |
| 13,310 | <i>ZBTB24</i>        | 0.010603115 |
| 13,311 | <i>LOC131076</i>     | 0.0106432   |
| 13,312 | <i>TMPRSS4</i>       | 0.010658659 |
| 13,313 | <i>CFL1</i>          | 0.010888196 |
| 13,314 | <i>USP12</i>         | 0.011003753 |
| 13,315 | <i>VMP</i>           | 0.011173001 |
| 13,316 | <i>LOC402573</i>     | 0.011521894 |
| 13,317 | <i>SPRY1</i>         | 0.011706025 |
| 13,318 | <i>TRIM47</i>        | 0.011887317 |
| 13,319 | <i>HLA-DRB5</i>      | 0.012609782 |
| 13,320 | <i>C5ORF11</i>       | 0.012866256 |
| 13,321 | <i>GABRB1</i>        | 0.013026703 |
| 13,322 | <i>S100A10</i>       | 0.013247641 |
| 13,323 | <i>CCR8</i>          | 0.013568387 |
| 13,324 | <i>LOC200159</i>     | 0.014072742 |
| 13,325 | <i>ZNF519</i>        | 0.014399223 |
| 13,326 | <i>FLJ31818</i>      | 0.014620786 |
| 13,327 | <i>CLSTN3</i>        | 0.014630756 |
| 13,328 | <i>DNAJC7</i>        | 0.014804928 |
| 13,329 | <i>NIPSNAP3A</i>     | 0.014896359 |
| 13,330 | <i>HMMR</i>          | 0.014918315 |
| 13,331 | <i>RNF43</i>         | 0.015037134 |
| 13,332 | <i>EPN3</i>          | 0.015475749 |
| 13,333 | <i>VSIG4</i>         | 0.015622691 |
| 13,334 | <i>KCNK7</i>         | 0.015993837 |
| 13,335 | <i>MYO15A</i>        | 0.016088908 |
| 13,336 | <i>C15ORF24</i>      | 0.01615091  |
| 13,337 | <i>NTN4</i>          | 0.016384725 |
| 13,338 | <i>MGC7036</i>       | 0.016406617 |

|        |                  |             |
|--------|------------------|-------------|
| 13,339 | <i>HCN3</i>      | 0.016515195 |
| 13,340 | <i>LYZL1</i>     | 0.016607327 |
| 13,341 | <i>MGC14151</i>  | 0.016954516 |
| 13,342 | <i>PADI2</i>     | 0.01712679  |
| 13,343 | <i>SCARB2</i>    | 0.017142744 |
| 13,344 | <i>GATA3</i>     | 0.01727142  |
| 13,345 | <i>FLJ20323</i>  | 0.017312664 |
| 13,346 | <i>RPS6KL1</i>   | 0.017425404 |
| 13,347 | <i>ESD</i>       | 0.017618417 |
| 13,348 | <i>MS4A7</i>     | 0.017972308 |
| 13,349 | <i>SLC31A2</i>   | 0.018165924 |
| 13,350 | <i>RAB3A</i>     | 0.018313345 |
| 13,351 | <i>HIST1H2BO</i> | 0.018946902 |
| 13,352 | <i>AMIGO2</i>    | 0.018963694 |
| 13,353 | <i>AMIGO2</i>    | 0.018963694 |
| 13,354 | <i>C6ORF25</i>   | 0.018970458 |
| 13,355 | <i>ALDH6A1</i>   | 0.019022635 |
| 13,356 | <i>MTMR9</i>     | 0.019030743 |
| 13,357 | <i>USP43</i>     | 0.019305053 |
| 13,358 | <i>SLCO5A1</i>   | 0.019583782 |
| 13,359 | <i>SNCG</i>      | 0.019657137 |
| 13,360 | <i>ZFP67</i>     | 0.020039695 |
| 13,361 | <i>CUZD1</i>     | 0.020570696 |
| 13,362 | <i>UTS2D</i>     | 0.020635588 |
| 13,363 | <i>EPS15</i>     | 0.020930422 |
| 13,364 | <i>ITPKA</i>     | 0.021114228 |
| 13,365 | <i>CETN2</i>     | 0.021214799 |
| 13,366 | <i>C20ORF70</i>  | 0.021473789 |
| 13,367 | <i>PYY</i>       | 0.021485557 |
| 13,368 | <i>ARHGAP24</i>  | 0.021571872 |
| 13,369 | <i>OR51G1</i>    | 0.021780926 |
| 13,370 | <i>SNCAIP</i>    | 0.021867784 |
| 13,371 | <i>C1orf204</i>  | 0.022304279 |
| 13,372 | <i>MYH3</i>      | 0.02235465  |
| 13,373 | <i>FLJ45880</i>  | 0.022794503 |
| 13,374 | <i>UIP1</i>      | 0.022835826 |
| 13,375 | <i>CASR</i>      | 0.02288902  |
| 13,376 | <i>C12ORF10</i>  | 0.02289555  |
| 13,377 | <i>AATF</i>      | 0.023585647 |
| 13,378 | <i>FLJ44952</i>  | 0.023784408 |
| 13,379 | <i>ARHGEF19</i>  | 0.023868175 |
| 13,380 | <i>LOC152519</i> | 0.02402029  |
| 13,381 | <i>MGC26710</i>  | 0.02409241  |
| 13,382 | <i>SYNCOILIN</i> | 0.024419601 |
| 13,383 | <i>CBX8</i>      | 0.024518201 |
| 13,384 | <i>LOC375748</i> | 0.024558863 |
| 13,385 | <i>DAF</i>       | 0.025376771 |

|        |                   |             |
|--------|-------------------|-------------|
| 13,386 | <i>MRC1</i>       | 0.025479995 |
| 13,387 | <i>FLJ25680</i>   | 0.026307027 |
| 13,388 | <i>KIAA0391</i>   | 0.026502952 |
| 13,389 | <i>RAB10</i>      | 0.026522205 |
| 13,390 | <i>LOC388815</i>  | 0.026985238 |
| 13,391 | <i>FARSLA</i>     | 0.027230868 |
| 13,392 | <i>SCARA3</i>     | 0.027269508 |
| 13,393 | <i>REST</i>       | 0.027344876 |
| 13,394 | <i>EHD4</i>       | 0.027502582 |
| 13,395 | <i>MGC27121</i>   | 0.027691259 |
| 13,396 | <i>PRNPIP</i>     | 0.027716477 |
| 13,397 | <i>SCIN</i>       | 0.027779697 |
| 13,398 | <i>GEMIN7</i>     | 0.02789452  |
| 13,399 | <i>IFRG15</i>     | 0.027917378 |
| 13,400 | <i>LOC132671</i>  | 0.028010023 |
| 13,401 | <i>CGRRF1</i>     | 0.028050039 |
| 13,402 | <i>C14ORF9</i>    | 0.028551537 |
| 13,403 | <i>MRPS14</i>     | 0.028964421 |
| 13,404 | <i>RERE</i>       | 0.029018035 |
| 13,405 | <i>PTK6</i>       | 0.029194977 |
| 13,406 | <i>SPATA11</i>    | 0.029349964 |
| 13,407 | <i>SET8</i>       | 0.029445179 |
| 13,408 | <i>HMX2</i>       | 0.029511    |
| 13,409 | <i>MGC13045</i>   | 0.029608518 |
| 13,410 | <i>PPP2R5B</i>    | 0.029721136 |
| 13,411 | <i>ELA2A</i>      | 0.029730674 |
| 13,412 | <i>C1QR1</i>      | 0.029879895 |
| 13,413 | <i>THRAP2</i>     | 0.029937523 |
| 13,414 | <i>PCOTH</i>      | 0.031569037 |
| 13,415 | <i>C18ORF37</i>   | 0.031613749 |
| 13,416 | <i>GGPS1</i>      | 0.03161906  |
| 13,417 | <i>ADCYAP1R1</i>  | 0.031660179 |
| 13,418 | <i>CHGN</i>       | 0.031830994 |
| 13,419 | <i>VN1R2</i>      | 0.032096184 |
| 13,420 | <i>RAMP1</i>      | 0.03242913  |
| 13,421 | <i>EFEMP2</i>     | 0.032604508 |
| 13,422 | <i>LOC158830</i>  | 0.032743982 |
| 13,423 | <i>IMPDH2</i>     | 0.032912149 |
| 13,424 | <i>CHST10</i>     | 0.033334357 |
| 13,425 | <i>AGTRL1</i>     | 0.033380326 |
| 13,426 | <i>SLC8A3</i>     | 0.033485855 |
| 13,427 | <i>GKN1</i>       | 0.033617011 |
| 13,428 | <i>CHPPR</i>      | 0.033620483 |
| 13,429 | <i>GADD45GIP1</i> | 0.033757333 |
| 13,430 | <i>HIF1A</i>      | 0.034017937 |
| 13,431 | <i>HRMT1L3</i>    | 0.034416541 |
| 13,432 | <i>FUBP1</i>      | 0.03471742  |

|        |                  |             |
|--------|------------------|-------------|
| 13,433 | <i>RLF</i>       | 0.034724987 |
| 13,434 | <i>TP53BP1</i>   | 0.034941778 |
| 13,435 | <i>OR10X1</i>    | 0.035015227 |
| 13,436 | <i>B3GAT3</i>    | 0.035533702 |
| 13,437 | <i>KIAA1747</i>  | 0.03570269  |
| 13,438 | <i>PHKA2</i>     | 0.035870106 |
| 13,439 | <i>LGR7</i>      | 0.036262102 |
| 13,440 | <i>PPP1R3A</i>   | 0.036344555 |
| 13,441 | <i>CUL3</i>      | 0.036428061 |
| 13,442 | <i>SFN</i>       | 0.036648467 |
| 13,443 | <i>CKLFSF2</i>   | 0.036918599 |
| 13,444 | <i>HOXA10</i>    | 0.037106885 |
| 13,445 | <i>BIG1</i>      | 0.037255545 |
| 13,446 | <i>MGC11134</i>  | 0.037635779 |
| 13,447 | <i>DNAJB12</i>   | 0.037737826 |
| 13,448 | <i>HSPBAP1</i>   | 0.037768468 |
| 13,449 | <i>HOXD9</i>     | 0.038382325 |
| 13,450 | <i>C2ORF26</i>   | 0.038458162 |
| 13,451 | <i>OR10H4</i>    | 0.03861427  |
| 13,452 | <i>AQP8</i>      | 0.038620467 |
| 13,453 | <i>FBXO47</i>    | 0.039591399 |
| 13,454 | <i>IFNA13</i>    | 0.039716421 |
| 13,455 | <i>TFCP2L1</i>   | 0.039920546 |
| 13,456 | <i>GLS2</i>      | 0.040197033 |
| 13,457 | <i>SCRN2</i>     | 0.040772366 |
| 13,458 | <i>TFRC</i>      | 0.041018161 |
| 13,459 | <i>ANKRD30A</i>  | 0.041120953 |
| 13,460 | <i>CSTF2</i>     | 0.041143423 |
| 13,461 | <i>TAS2R7</i>    | 0.041194885 |
| 13,462 | <i>ZC3H3</i>     | 0.041292685 |
| 13,463 | <i>OR8B3</i>     | 0.041582537 |
| 13,464 | <i>CXCL16</i>    | 0.041874339 |
| 13,465 | <i>EZH2</i>      | 0.042151944 |
| 13,466 | <i>LOC643812</i> | 0.04229962  |
| 13,467 | <i>HTLF</i>      | 0.042445584 |
| 13,468 | <i>MT4</i>       | 0.042586679 |
| 13,469 | <i>HIST1H2AB</i> | 0.04261491  |
| 13,470 | <i>CHRFAM7A</i>  | 0.042789811 |
| 13,471 | <i>LOC402644</i> | 0.043021109 |
| 13,472 | <i>MAPKAPK5</i>  | 0.043193328 |
| 13,473 | <i>GTF2H2</i>    | 0.043503532 |
| 13,474 | <i>C17ORF28</i>  | 0.043694418 |
| 13,475 | <i>CBARA1</i>    | 0.04386179  |
| 13,476 | <i>KIAA1967</i>  | 0.043975664 |
| 13,477 | <i>E2IG2</i>     | 0.044020918 |
| 13,478 | <i>RHOV</i>      | 0.044046345 |
| 13,479 | <i>C9ORF48</i>   | 0.044064398 |

|        |                  |             |
|--------|------------------|-------------|
| 13,480 | <i>CPS1</i>      | 0.044131807 |
| 13,481 | <i>RECQL</i>     | 0.044243425 |
| 13,482 | <i>ADCY4</i>     | 0.04431917  |
| 13,483 | <i>TUFT1</i>     | 0.044741793 |
| 13,484 | <i>TETRA</i>     | 0.044756349 |
| 13,485 | <i>NUDT11</i>    | 0.044992995 |
| 13,486 | <i>PSIP1</i>     | 0.045300896 |
| 13,487 | <i>CHP</i>       | 0.045357511 |
| 13,488 | <i>LCE1E</i>     | 0.045521777 |
| 13,489 | <i>EHD2</i>      | 0.045847811 |
| 13,490 | <i>GENX-3414</i> | 0.046096618 |
| 13,491 | <i>FLJ14103</i>  | 0.047502782 |
| 13,492 | <i>FLJ13448</i>  | 0.047735594 |
| 13,493 | <i>WDR31</i>     | 0.048027091 |
| 13,494 | <i>KCTD15</i>    | 0.048072904 |
| 13,495 | <i>HSD11B1</i>   | 0.048565036 |
| 13,496 | <i>tcag7.926</i> | 0.048605484 |
| 13,497 | <i>BIN1</i>      | 0.049015408 |
| 13,498 | <i>DUSP11</i>    | 0.049098394 |
| 13,499 | <i>CAPN2</i>     | 0.049799445 |
| 13,500 | <i>RBM21</i>     | 0.049843996 |
| 13,501 | <i>LOC388419</i> | 0.050168791 |
| 13,502 | <i>INDO</i>      | 0.05018388  |
| 13,503 | <i>FLJ22184</i>  | 0.050402711 |
| 13,504 | <i>TUSC4</i>     | 0.050487494 |
| 13,505 | <i>KIAA1441</i>  | 0.050717633 |
| 13,506 | <i>LOC728137</i> | 0.050922818 |
| 13,507 | <i>NEFL</i>      | 0.050927311 |
| 13,508 | <i>ZBTB39</i>    | 0.051077203 |
| 13,509 | <i>SNRPG</i>     | 0.05112587  |
| 13,510 | <i>HSRTSBETA</i> | 0.05122546  |
| 13,511 | <i>ZNF124</i>    | 0.051249273 |
| 13,512 | <i>LAP1B</i>     | 0.051514223 |
| 13,513 | <i>LOC164395</i> | 0.051532253 |
| 13,514 | <i>MGC32871</i>  | 0.0515833   |
| 13,515 | <i>PCGF5</i>     | 0.051871927 |
| 13,516 | <i>CILP2</i>     | 0.051919433 |
| 13,517 | <i>GFPT2</i>     | 0.052019059 |
| 13,518 | <i>CDC42EP3</i>  | 0.052242251 |
| 13,519 | <i>KIAA1456</i>  | 0.052591396 |
| 13,520 | <i>PTP4A3</i>    | 0.052729949 |
| 13,521 | <i>ALG8</i>      | 0.052835117 |
| 13,522 | <i>CTBP2</i>     | 0.052908814 |
| 13,523 | <i>UNC84B</i>    | 0.052942993 |
| 13,524 | <i>CCL18</i>     | 0.052942993 |
| 13,525 | <i>CUL2</i>      | 0.053093098 |
| 13,526 | <i>GDF6</i>      | 0.053526052 |



|        |                      |             |
|--------|----------------------|-------------|
| 13,527 | <i>MOCS3</i>         | 0.053549217 |
| 13,528 | <i>CBLL1</i>         | 0.053673036 |
| 13,529 | <i>MGC4093</i>       | 0.053711735 |
| 13,530 | <i>SEC24B</i>        | 0.053776447 |
| 13,531 | <i>PAOX</i>          | 0.053839624 |
| 13,532 | <i>DSG3</i>          | 0.054102706 |
| 13,533 | <i>CLECSF1</i>       | 0.054213798 |
| 13,534 | <i>WDFY2</i>         | 0.054314508 |
| 13,535 | <i>KCNK4</i>         | 0.054321821 |
| 13,536 | <i>SYCP3</i>         | 0.05448235  |
| 13,537 | <i>GIMAP1</i>        | 0.054565855 |
| 13,538 | <i>C9ORF25</i>       | 0.054827079 |
| 13,539 | <i>FLJ44060</i>      | 0.054983003 |
| 13,540 | <i>SAE1</i>          | 0.055157736 |
| 13,541 | <i>P4HA1</i>         | 0.055160754 |
| 13,542 | <i>HAO1</i>          | 0.055278316 |
| 13,543 | <i>SEC6L1</i>        | 0.055596089 |
| 13,544 | <i>KIF9</i>          | 0.055686308 |
| 13,545 | <i>C14ORF79</i>      | 0.055916614 |
| 13,546 | <i>RFC1</i>          | 0.056081332 |
| 13,547 | <i>ZCCHC6</i>        | 0.056366049 |
| 13,548 | <i>DKFZP434C0631</i> | 0.056376224 |
| 13,549 | <i>TUBB2</i>         | 0.056553154 |
| 13,550 | <i>IVL</i>           | 0.056790348 |
| 13,551 | <i>LRP1</i>          | 0.056875366 |
| 13,552 | <i>HAAO</i>          | 0.05689013  |
| 13,553 | <i>CGB5</i>          | 0.057097562 |
| 13,554 | <i>SDOS</i>          | 0.057303444 |
| 13,555 | <i>LOC374955</i>     | 0.057380272 |
| 13,556 | <i>C3ORF4</i>        | 0.057627055 |
| 13,557 | <i>ARFGF2</i>        | 0.05770108  |
| 13,558 | <i>LOC126248</i>     | 0.057802813 |
| 13,559 | <i>DEFB128</i>       | 0.058304728 |
| 13,560 | <i>ZNF618</i>        | 0.058394871 |
| 13,561 | <i>R-SPONDIN</i>     | 0.059207702 |
| 13,562 | <i>TAS2R43</i>       | 0.059398171 |
| 13,563 | <i>UBPH</i>          | 0.059805021 |
| 13,564 | <i>RUTBC2</i>        | 0.060477864 |
| 13,565 | <i>SIAH2</i>         | 0.060726888 |
| 13,566 | <i>NPL4</i>          | 0.060779664 |
| 13,567 | <i>HMP19</i>         | 0.061165064 |
| 13,568 | <i>TMOD1</i>         | 0.061728099 |
| 13,569 | <i>SLC22A15</i>      | 0.061741429 |
| 13,570 | <i>MAST4</i>         | 0.062835889 |
| 13,571 | <i>LAK</i>           | 0.063820815 |
| 13,572 | <i>ARHGAP21</i>      | 0.064102627 |
| 13,573 | <i>ARHGAP21</i>      | 0.064102627 |

|        |           |             |
|--------|-----------|-------------|
| 13,574 | AKAP8L    | 0.064118606 |
| 13,575 | ACBD5     | 0.064146481 |
| 13,576 | RTN2      | 0.064313829 |
| 13,577 | DUT       | 0.064452035 |
| 13,578 | CDC42EP2  | 0.064458331 |
| 13,579 | ADSL      | 0.064471617 |
| 13,580 | LOC157657 | 0.064522704 |
| 13,581 | B7        | 0.064525762 |
| 13,582 | EIF4EBP2  | 0.06486757  |
| 13,583 | RAE1      | 0.065516578 |
| 13,584 | ZNF704    | 0.065618732 |
| 13,585 | VHLL      | 0.065898908 |
| 13,586 | HSU79303  | 0.066044672 |
| 13,587 | KRTHB3    | 0.066187397 |
| 13,588 | PCDHGB4   | 0.066194776 |
| 13,589 | CLYBL     | 0.066372607 |
| 13,590 | SATB1     | 0.066582548 |
| 13,591 | PTPN2     | 0.066829342 |
| 13,592 | KCNJ11    | 0.067227258 |
| 13,593 | GAGEB1    | 0.067261801 |
| 13,594 | PIN4      | 0.067275536 |
| 13,595 | MYRIP     | 0.067448033 |
| 13,596 | C21ORF123 | 0.06758281  |
| 13,597 | PCMT1     | 0.067722668 |
| 13,598 | DTX2      | 0.0677289   |
| 13,599 | NUDT14    | 0.06776255  |
| 13,600 | LST1      | 0.067780111 |
| 13,601 | USP35     | 0.067831972 |
| 13,602 | CALN1     | 0.067865606 |
| 13,603 | LOC92196  | 0.068026454 |
| 13,604 | SLC5A8    | 0.06867526  |
| 13,605 | SERPINE2  | 0.069786793 |
| 13,606 | OR10C1    | 0.069795433 |
| 13,607 | ARID1B    | 0.070129309 |
| 13,608 | POLG2     | 0.070178243 |
| 13,609 | MTHFR     | 0.070446186 |
| 13,610 | OPN1LW    | 0.07070792  |
| 13,611 | CTNNB1    | 0.070740686 |
| 13,612 | LOC285148 | 0.070813203 |
| 13,613 | LOC284207 | 0.071079663 |
| 13,614 | FABP4     | 0.071347957 |
| 13,615 | ERAF      | 0.071569888 |
| 13,616 | PCDHGA8   | 0.072232748 |
| 13,617 | IBSP      | 0.072250544 |
| 13,618 | KRTAP6-2  | 0.072276879 |
| 13,619 | ATRNL1    | 0.072276879 |
| 13,620 | FLJ30525  | 0.072384755 |

|        |                      |             |
|--------|----------------------|-------------|
| 13,621 | <i>CCR9</i>          | 0.072466327 |
| 13,622 | <i>ARG1</i>          | 0.072559989 |
| 13,623 | <i>ATM</i>           | 0.072785317 |
| 13,624 | <i>AP3S1</i>         | 0.073274971 |
| 13,625 | <i>CDCA8</i>         | 0.073360679 |
| 13,626 | <i>NRG1</i>          | 0.073571635 |
| 13,627 | <i>SEMA7A</i>        | 0.073589218 |
| 13,628 | <i>FLJ45187</i>      | 0.073614528 |
| 13,629 | <i>PDZK3</i>         | 0.07401756  |
| 13,630 | <i>RUNX3</i>         | 0.074064932 |
| 13,631 | <i>ANKRD13</i>       | 0.074192326 |
| 13,632 | <i>NAGK</i>          | 0.074465342 |
| 13,633 | <i>RAD51L1</i>       | 0.074944808 |
| 13,634 | <i>FRAT2</i>         | 0.075390955 |
| 13,635 | <i>TMLHE</i>         | 0.075631893 |
| 13,636 | <i>LRP3</i>          | 0.075822676 |
| 13,637 | <i>GFI1</i>          | 0.075980962 |
| 13,638 | <i>YT521</i>         | 0.076040821 |
| 13,639 | <i>PCDH17</i>        | 0.076166356 |
| 13,640 | <i>SERP1</i>         | 0.076728312 |
| 13,641 | <i>KIAA1598</i>      | 0.076845893 |
| 13,642 | <i>SCN2B</i>         | 0.077386858 |
| 13,643 | <i>PHPT1</i>         | 0.077561232 |
| 13,644 | <i>MGC48625</i>      | 0.077613174 |
| 13,645 | <i>GCSH</i>          | 0.077833038 |
| 13,646 | <i>UCK1</i>          | 0.078010618 |
| 13,647 | <i>ZNF267</i>        | 0.079090241 |
| 13,648 | <i>HSPCB</i>         | 0.079286683 |
| 13,649 | <i>EPHB2</i>         | 0.07937903  |
| 13,650 | <i>KHDRBS2</i>       | 0.079394871 |
| 13,651 | <i>NAV3</i>          | 0.079562369 |
| 13,652 | <i>GPR1</i>          | 0.079624375 |
| 13,653 | <i>DUSP3</i>         | 0.08020532  |
| 13,654 | <i>LPHN2</i>         | 0.080231176 |
| 13,655 | <i>SLC16A2</i>       | 0.080518761 |
| 13,656 | <i>TFPI</i>          | 0.080589457 |
| 13,657 | <i>FLT1</i>          | 0.081371627 |
| 13,658 | <i>KHK</i>           | 0.081733977 |
| 13,659 | <i>KRTCAP2</i>       | 0.081878003 |
| 13,660 | <i>SPAG1</i>         | 0.082096861 |
| 13,661 | <i>SCA2</i>          | 0.082376519 |
| 13,662 | <i>CDK5RAP3</i>      | 0.082533883 |
| 13,663 | <i>DKFZP43400213</i> | 0.082612905 |
| 13,664 | <i>C1orf166</i>      | 0.082704238 |
| 13,665 | <i>KIR3DP1</i>       | 0.082784365 |
| 13,666 | <i>LOC338773</i>     | 0.084594618 |
| 13,667 | <i>ZNF462</i>        | 0.084613309 |

|        |           |             |
|--------|-----------|-------------|
| 13,668 | KAB       | 0.08477258  |
| 13,669 | ARHGEF17  | 0.084813964 |
| 13,670 | OPN4      | 0.084913238 |
| 13,671 | SH3RF2    | 0.085192673 |
| 13,672 | PPP2R4    | 0.085337963 |
| 13,673 | KIAA0683  | 0.085565265 |
| 13,674 | ANGPTL2   | 0.085901873 |
| 13,675 | TAF12     | 0.085942202 |
| 13,676 | FLJ32942  | 0.085958067 |
| 13,677 | TXNDC12   | 0.085959144 |
| 13,678 | DOM3Z     | 0.086136067 |
| 13,679 | SLC1A3    | 0.086406251 |
| 13,680 | TMEM28    | 0.086949457 |
| 13,681 | ADRBK1    | 0.087048572 |
| 13,682 | ZC3HAV1   | 0.087099875 |
| 13,683 | LHX1      | 0.087374405 |
| 13,684 | FLJ20527  | 0.088138997 |
| 13,685 | LOC131149 | 0.088990161 |
| 13,686 | DCBLD2    | 0.089070537 |
| 13,687 | MGC29898  | 0.089245761 |
| 13,688 | DOK5      | 0.089343722 |
| 13,689 | EDG4      | 0.089551809 |
| 13,690 | GAA       | 0.089736852 |
| 13,691 | PKLR      | 0.090032531 |
| 13,692 | PGRMC2    | 0.09063404  |
| 13,693 | SFRP4     | 0.090701762 |
| 13,694 | C1D       | 0.090835329 |
| 13,695 | HNRPA1    | 0.090932621 |
| 13,696 | MYR8      | 0.090974772 |
| 13,697 | RUVBL2    | 0.091095833 |
| 13,698 | OR5I1     | 0.091251506 |
| 13,699 | FCN1      | 0.091771934 |
| 13,700 | KLF3      | 0.091808722 |
| 13,701 | EIF1AY    | 0.091892255 |
| 13,702 | LENG5     | 0.092281787 |
| 13,703 | BRD1      | 0.092315687 |
| 13,704 | C19ORF20  | 0.092557326 |
| 13,705 | ELP3      | 0.092605173 |
| 13,706 | LOC388753 | 0.092881514 |
| 13,707 | SECISBP2  | 0.093003914 |
| 13,708 | CYP2A6    | 0.093020621 |
| 13,709 | IGSF4     | 0.093174987 |
| 13,710 | ARHGEF7   | 0.093811977 |
| 13,711 | WNT2      | 0.094168585 |
| 13,712 | SSH1      | 0.094203437 |
| 13,713 | PTK9L     | 0.094493407 |
| 13,714 | RABIF     | 0.09459022  |

|        |                  |             |
|--------|------------------|-------------|
| 13,715 | <i>PRDX4</i>     | 0.094658913 |
| 13,716 | <i>OTOF</i>      | 0.094809004 |
| 13,717 | <i>SUMF2</i>     | 0.094885854 |
| 13,718 | <i>TIF1</i>      | 0.095022635 |
| 13,719 | <i>PTCD1</i>     | 0.095062895 |
| 13,720 | <i>FLJ90805</i>  | 0.0951685   |
| 13,721 | <i>GRAP2</i>     | 0.095241749 |
| 13,722 | <i>ESRRB</i>     | 0.095497256 |
| 13,723 | <i>AE2</i>       | 0.095599111 |
| 13,724 | <i>POU4F2</i>    | 0.096142191 |
| 13,725 | <i>EPIM</i>      | 0.096346595 |
| 13,726 | <i>TDO2</i>      | 0.096448335 |
| 13,727 | <i>GABRA3</i>    | 0.096607721 |
| 13,728 | <i>TLR3</i>      | 0.096679307 |
| 13,729 | <i>BET1</i>      | 0.097255463 |
| 13,730 | <i>CDH1</i>      | 0.097393344 |
| 13,731 | <i>CEP1</i>      | 0.097668801 |
| 13,732 | <i>TXNDC9</i>    | 0.098375612 |
| 13,733 | <i>HTR6</i>      | 0.098608774 |
| 13,734 | <i>HT036</i>     | 0.098659885 |
| 13,735 | <i>STK17A</i>    | 0.09931984  |
| 13,736 | <i>CHRNA9</i>    | 0.099344576 |
| 13,737 | <i>VANGL1</i>    | 0.099367884 |
| 13,738 | <i>ZNFN1A1</i>   | 0.099476907 |
| 13,739 | <i>FCER2</i>     | 0.099498115 |
| 13,740 | <i>OR2B11</i>    | 0.099522875 |
| 13,741 | <i>ENPP3</i>     | 0.099689762 |
| 13,742 | <i>PUM2</i>      | 0.099810025 |
| 13,743 | <i>HBQ1</i>      | 0.100001142 |
| 13,744 | <i>FOXK1</i>     | 0.100097746 |
| 13,745 | <i>KIF20A</i>    | 0.100332263 |
| 13,746 | <i>PCNP</i>      | 0.100525938 |
| 13,747 | <i>CSTF3</i>     | 0.100618637 |
| 13,748 | <i>CLSPN</i>     | 0.101177384 |
| 13,749 | <i>AMICA</i>     | 0.101231816 |
| 13,750 | <i>FLJ12604</i>  | 0.101637344 |
| 13,751 | <i>SOX15</i>     | 0.101729863 |
| 13,752 | <i>LOC493856</i> | 0.10182294  |
| 13,753 | <i>FGFRL1</i>    | 0.102168527 |
| 13,754 | <i>EFO1</i>      | 0.102609014 |
| 13,755 | <i>CRYBA4</i>    | 0.102745214 |
| 13,756 | <i>R29124_1</i>  | 0.102948691 |
| 13,757 | <i>PQLC1</i>     | 0.103185547 |
| 13,758 | <i>FLJ36070</i>  | 0.103529791 |
| 13,759 | <i>PRKG1</i>     | 0.104261029 |
| 13,760 | <i>KUA</i>       | 0.104524183 |
| 13,761 | <i>RFPL1</i>     | 0.104681588 |

|        |           |             |
|--------|-----------|-------------|
| 13,762 | TRAM2     | 0.104739359 |
| 13,763 | C13ORF23  | 0.104968052 |
| 13,764 | C13ORF23  | 0.104968052 |
| 13,765 | ST18      | 0.105354101 |
| 13,766 | GPR81     | 0.105356361 |
| 13,767 | ZNF77     | 0.105524256 |
| 13,768 | LOC146712 | 0.105575377 |
| 13,769 | ZNF33B    | 0.105646861 |
| 13,770 | TCF7L2    | 0.105667778 |
| 13,771 | SLC2A7    | 0.105890025 |
| 13,772 | TRPC4     | 0.105943569 |
| 13,773 | POP4      | 0.106149229 |
| 13,774 | PLEKHG1   | 0.106751199 |
| 13,775 | LIAS      | 0.10680805  |
| 13,776 | FLJ20485  | 0.108038126 |
| 13,777 | KHDRBS3   | 0.108328936 |
| 13,778 | AANAT     | 0.108374025 |
| 13,779 | OVCH1     | 0.10867776  |
| 13,780 | RXFP4     | 0.109018549 |
| 13,781 | G22P1     | 0.109222094 |
| 13,782 | SYAP1     | 0.109428217 |
| 13,783 | DBI       | 0.109462595 |
| 13,784 | FSHR      | 0.109484552 |
| 13,785 | MRPL15    | 0.109560919 |
| 13,786 | WDR18     | 0.109715462 |
| 13,787 | GLRB      | 0.10988412  |
| 13,788 | CXXC5     | 0.110045684 |
| 13,789 | LOC220929 | 0.110271484 |
| 13,790 | GLDC      | 0.110311535 |
| 13,791 | FLJ13089  | 0.110460845 |
| 13,792 | DNTTIP1   | 0.110724435 |
| 13,793 | SMYD5     | 0.110747866 |
| 13,794 | CNTN3     | 0.11095729  |
| 13,795 | PCDH16    | 0.111313586 |
| 13,796 | LOC440905 | 0.111336097 |
| 13,797 | COX8C     | 0.112416061 |
| 13,798 | TRIM45    | 0.112489331 |
| 13,799 | B3GAT1    | 0.112750437 |
| 13,800 | G0S2      | 0.112858084 |
| 13,801 | C6ORF37   | 0.113466759 |
| 13,802 | OTP-NT    | 0.113568636 |
| 13,803 | NF2       | 0.113588528 |
| 13,804 | ARHGAP18  | 0.113769451 |
| 13,805 | ZNF600    | 0.113980048 |
| 13,806 | ROS1      | 0.114719498 |
| 13,807 | ZNF100    | 0.114740671 |

|        |                  |             |
|--------|------------------|-------------|
| 13,808 | <i>DERA</i>      | 0.11494868  |
| 13,809 | <i>EIF4G3</i>    | 0.115069815 |
| 13,810 | <i>ZNF227</i>    | 0.115130002 |
| 13,811 | <i>FAM20C</i>    | 0.115626268 |
| 13,812 | <i>RASA4</i>     | 0.115646116 |
| 13,813 | <i>KCNA4</i>     | 0.115828584 |
| 13,814 | <i>TLR9</i>      | 0.116308064 |
| 13,815 | <i>OR6M1</i>     | 0.116448759 |
| 13,816 | <i>BYSL</i>      | 0.116595258 |
| 13,817 | <i>MVK</i>       | 0.117728594 |
| 13,818 | <i>AMOTL1</i>    | 0.117788577 |
| 13,819 | <i>AMOTL1</i>    | 0.117788577 |
| 13,820 | <i>DEPDC6</i>    | 0.11781561  |
| 13,821 | <i>NKX2-2</i>    | 0.118256229 |
| 13,822 | <i>MAD1L1</i>    | 0.118447068 |
| 13,823 | <i>FBXL11</i>    | 0.118527127 |
| 13,824 | <i>TRIM54</i>    | 0.11856202  |
| 13,825 | <i>KCNJ8</i>     | 0.118715051 |
| 13,826 | <i>SELS</i>      | 0.11890029  |
| 13,827 | <i>ANKRD6</i>    | 0.119074294 |
| 13,828 | <i>VGCNL1</i>    | 0.119206624 |
| 13,829 | <i>SYTL1</i>     | 0.11935603  |
| 13,830 | <i>SPTBN2</i>    | 0.119594354 |
| 13,831 | <i>LRRFIP1</i>   | 0.119718622 |
| 13,832 | <i>SDCCAG3</i>   | 0.119994052 |
| 13,833 | <i>FGF7</i>      | 0.120110162 |
| 13,834 | <i>POU3F3</i>    | 0.120707316 |
| 13,835 | <i>MRPS15</i>    | 0.120896572 |
| 13,836 | <i>CHIA</i>      | 0.120941125 |
| 13,837 | <i>LOC64744</i>  | 0.121398995 |
| 13,838 | <i>SFXN3</i>     | 0.121403115 |
| 13,839 | <i>STARD3</i>    | 0.121962688 |
| 13,840 | <i>BCAT1</i>     | 0.121969648 |
| 13,841 | <i>TPARL</i>     | 0.122247153 |
| 13,842 | <i>DFNA5</i>     | 0.122562018 |
| 13,843 | <i>MGC33212</i>  | 0.122634393 |
| 13,844 | <i>ZNF80</i>     | 0.122718359 |
| 13,845 | <i>MGC40042</i>  | 0.122979735 |
| 13,846 | <i>EXOSC4</i>    | 0.123289268 |
| 13,847 | <i>FLJ10786</i>  | 0.123382343 |
| 13,848 | <i>FLJ22655</i>  | 0.123402597 |
| 13,849 | <i>MGC26598</i>  | 0.123799476 |
| 13,850 | <i>LOC284402</i> | 0.123887614 |
| 13,851 | <i>SAT2</i>      | 0.123961468 |
| 13,852 | <i>ADARB2</i>    | 0.124051895 |
| 13,853 | <i>CDK6</i>      | 0.124738895 |

|        |                  |             |
|--------|------------------|-------------|
| 13,854 | <i>LOC400689</i> | 0.125299999 |
| 13,855 | <i>PDHB</i>      | 0.125516704 |
| 13,856 | <i>KRTAP25-1</i> | 0.126312968 |
| 13,857 | <i>CD160</i>     | 0.126580811 |
| 13,858 | <i>UQCRFS1</i>   | 0.126728929 |
| 13,859 | <i>TRPS1</i>     | 0.126861305 |
| 13,860 | <i>TFB1M</i>     | 0.127142863 |
| 13,861 | <i>ANGPTL4</i>   | 0.127681438 |
| 13,862 | <i>WNT3</i>      | 0.127827567 |
| 13,863 | <i>SIGLEC6</i>   | 0.128190771 |
| 13,864 | <i>RORB</i>      | 0.128636795 |
| 13,865 | <i>ATP9A</i>     | 0.128654592 |
| 13,866 | <i>HGD</i>       | 0.12893251  |
| 13,867 | <i>FAM9A</i>     | 0.129066426 |
| 13,868 | <i>COL5A3</i>    | 0.129323468 |
| 13,869 | <i>GRIN2A</i>    | 0.129504383 |
| 13,870 | <i>ARL6</i>      | 0.129707025 |
| 13,871 | <i>KIAA1295</i>  | 0.12972274  |
| 13,872 | <i>AP4E1</i>     | 0.129975762 |
| 13,873 | <i>IL2RG</i>     | 0.130095899 |
| 13,874 | <i>AHSA2</i>     | 0.130281745 |
| 13,875 | <i>FLJ36208</i>  | 0.1308464   |
| 13,876 | <i>E2F1</i>      | 0.131098143 |
| 13,877 | <i>ASXL2</i>     | 0.131684644 |
| 13,878 | <i>FLJ22595</i>  | 0.131693741 |
| 13,879 | <i>SLC3A1</i>    | 0.132228055 |
| 13,880 | <i>ZCCHC2</i>    | 0.132380789 |
| 13,881 | <i>SLC36A1</i>   | 0.132604708 |
| 13,882 | <i>NELF</i>      | 0.132727693 |
| 13,883 | <i>RORA</i>      | 0.132773336 |
| 13,884 | <i>MRPL2</i>     | 0.1330396   |
| 13,885 | <i>PRICKLE1</i>  | 0.133393894 |
| 13,886 | <i>CASC3</i>     | 0.133504461 |
| 13,887 | <i>HS3ST6</i>    | 0.133574593 |
| 13,888 | <i>LOC91752</i>  | 0.133658925 |
| 13,889 | <i>LOC653978</i> | 0.133688761 |
| 13,890 | <i>FAM24A</i>    | 0.133890425 |
| 13,891 | <i>ATF7IP2</i>   | 0.134606538 |
| 13,892 | <i>RALGPS2</i>   | 0.134848762 |
| 13,893 | <i>CHPF</i>      | 0.134870236 |
| 13,894 | <i>PRCD</i>      | 0.134931081 |
| 13,895 | <i>DOK2</i>      | 0.135107294 |
| 13,896 | <i>HAPLN3</i>    | 0.135464789 |
| 13,897 | <i>KCNIP1</i>    | 0.135674344 |
| 13,898 | <i>USP26</i>     | 0.135797611 |
| 13,899 | <i>CLEC4C</i>    | 0.136628054 |
| 13,900 | <i>KCTD18</i>    | 0.136777923 |



|        |                  |             |
|--------|------------------|-------------|
| 13,901 | <i>C7ORF11</i>   | 0.136870955 |
| 13,902 | <i>DCTN1</i>     | 0.136870955 |
| 13,903 | <i>NS</i>        | 0.13770451  |
| 13,904 | <i>LOC124245</i> | 0.137884017 |
| 13,905 | <i>SRCRB4D</i>   | 0.138462214 |
| 13,906 | <i>SUV39H2</i>   | 0.138495253 |
| 13,907 | <i>TFEB</i>      | 0.138525799 |
| 13,908 | <i>LOC729767</i> | 0.138951694 |
| 13,909 | <i>PABPC4</i>    | 0.139620388 |
| 13,910 | <i>KIR2DL5</i>   | 0.139817735 |
| 13,911 | <i>SREBF1</i>    | 0.1398258   |
| 13,912 | <i>DHRS4</i>     | 0.139831023 |
| 13,913 | <i>ZADH1</i>     | 0.140119435 |
| 13,914 | <i>NFIA</i>      | 0.140122758 |
| 13,915 | <i>AURKB</i>     | 0.141132671 |
| 13,916 | <i>RAB28</i>     | 0.141161732 |
| 13,917 | <i>TMEM27</i>    | 0.141210992 |
| 13,918 | <i>TM4SF1</i>    | 0.141877109 |
| 13,919 | <i>DGAT2</i>     | 0.142072971 |
| 13,920 | <i>TIMP1</i>     | 0.142212911 |
| 13,921 | <i>PARP4</i>     | 0.143106478 |
| 13,922 | <i>FEM1C</i>     | 0.143193283 |
| 13,923 | <i>P2RY11</i>    | 0.143331722 |
| 13,924 | <i>EDF1</i>      | 0.143334552 |
| 13,925 | <i>TPTE</i>      | 0.143836128 |
| 13,926 | <i>ZNF587</i>    | 0.1443982   |
| 13,927 | <i>PTER</i>      | 0.14500766  |
| 13,928 | <i>OLIG2</i>     | 0.145269443 |
| 13,929 | <i>ARP10</i>     | 0.145789006 |
| 13,930 | <i>FBXL19</i>    | 0.146533537 |
| 13,931 | <i>LOC284013</i> | 0.146976895 |
| 13,932 | <i>NUDT5</i>     | 0.147137363 |
| 13,933 | <i>OBSCN</i>     | 0.147228091 |
| 13,934 | <i>OR10J3</i>    | 0.147541324 |
| 13,935 | <i>PCDHB12</i>   | 0.148647974 |
| 13,936 | <i>MAPRE2</i>    | 0.148709717 |
| 13,937 | <i>SLC25A30</i>  | 0.148804034 |
| 13,938 | <i>ASPSCR1</i>   | 0.149017966 |
| 13,939 | <i>APH-1A</i>    | 0.14913309  |
| 13,940 | <i>SH3BP4</i>    | 0.149283324 |
| 13,941 | <i>UGT1A10</i>   | 0.149553356 |
| 13,942 | <i>ARNTL</i>     | 0.149618983 |
| 13,943 | <i>HEL308</i>    | 0.14964237  |
| 13,944 | <i>ATP13A3</i>   | 0.150023282 |
| 13,945 | <i>MAGEB6</i>    | 0.150346898 |
| 13,946 | <i>PANX3</i>     | 0.150473664 |
| 13,947 | <i>SLC7A13</i>   | 0.150722427 |

|        |                 |             |
|--------|-----------------|-------------|
| 13,948 | <i>U2AF2</i>    | 0.1507777   |
| 13,949 | <i>BAALC</i>    | 0.150896965 |
| 13,950 | <i>GLI4</i>     | 0.15121893  |
| 13,951 | <i>FAS</i>      | 0.151515977 |
| 13,952 | <i>ARL9</i>     | 0.151812306 |
| 13,953 | <i>BRD9</i>     | 0.152041866 |
| 13,954 | <i>USP9X</i>    | 0.152527676 |
| 13,955 | <i>MGC45386</i> | 0.152878731 |
| 13,956 | <i>C10ORF65</i> | 0.153006969 |
| 13,957 | <i>BLK</i>      | 0.153185464 |
| 13,958 | <i>FLJ14721</i> | 0.153558696 |
| 13,959 | <i>NRCAM</i>    | 0.154099464 |
| 13,960 | <i>LOC55924</i> | 0.154719462 |
| 13,961 | <i>PLA2G1B</i>  | 0.154728518 |
| 13,962 | <i>SLC25A12</i> | 0.155552737 |
| 13,963 | <i>CNN3</i>     | 0.155779976 |
| 13,964 | <i>NDUFS3</i>   | 0.156126264 |
| 13,965 | <i>FLJ20160</i> | 0.156167123 |
| 13,966 | <i>C6ORF210</i> | 0.156605761 |
| 13,967 | <i>FGD1</i>     | 0.156983413 |
| 13,968 | <i>PRRG4</i>    | 0.157203409 |
| 13,969 | <i>MATN3</i>    | 0.157680706 |
| 13,970 | <i>FLJ35827</i> | 0.157863268 |
| 13,971 | <i>WFDC6</i>    | 0.158427423 |
| 13,972 | <i>MGC33370</i> | 0.158865116 |
| 13,973 | <i>MGC57359</i> | 0.159239303 |
| 13,974 | <i>ANXA11</i>   | 0.159428247 |
| 13,975 | <i>OR4D10</i>   | 0.159511827 |
| 13,976 | <i>OR51F1</i>   | 0.159526516 |
| 13,977 | <i>KCNB2</i>    | 0.159597338 |
| 13,978 | <i>DCUN1D5</i>  | 0.159920257 |
| 13,979 | <i>ZNF266</i>   | 0.160250302 |
| 13,980 | <i>MGC24665</i> | 0.160493792 |
| 13,981 | <i>KIAA1822</i> | 0.160903443 |
| 13,982 | <i>COL1A1</i>   | 0.161000593 |
| 13,983 | <i>TACSTD2</i>  | 0.161275072 |
| 13,984 | <i>CASQ1</i>    | 0.161383584 |
| 13,985 | <i>KIAA1576</i> | 0.161444084 |
| 13,986 | <i>MLR1</i>     | 0.161483422 |
| 13,987 | <i>ST8SIA5</i>  | 0.161567766 |
| 13,988 | <i>ANPEP</i>    | 0.161584514 |
| 13,989 | <i>FLJ35767</i> | 0.161745257 |
| 13,990 | <i>DHDDS</i>    | 0.161989018 |
| 13,991 | <i>LUC7A</i>    | 0.161996739 |
| 13,992 | <i>GDAP2</i>    | 0.162073139 |
| 13,993 | <i>C6ORF145</i> | 0.162118446 |
| 13,994 | <i>RAB3GAP1</i> | 0.162298899 |

|        |           |             |
|--------|-----------|-------------|
| 13,995 | CCR7      | 0.162517582 |
| 13,996 | SEC23B    | 0.162683728 |
| 13,997 | ZNF213    | 0.162803105 |
| 13,998 | CRSP6     | 0.163282756 |
| 13,999 | CASKIN2   | 0.164330086 |
| 14,000 | THUMPD2   | 0.164638092 |
| 14,001 | TRIM11    | 0.164981547 |
| 14,002 | KAAG1     | 0.165025046 |
| 14,003 | RAB3D     | 0.165028574 |
| 14,004 | RIN1      | 0.165092465 |
| 14,005 | TAX1BP1   | 0.165189481 |
| 14,006 | MRPS22    | 0.165448466 |
| 14,007 | FLJ25124  | 0.167832744 |
| 14,008 | TMEPAI    | 0.167835524 |
| 14,009 | XBP1      | 0.16783673  |
| 14,010 | UBE2O     | 0.168039121 |
| 14,011 | MSL2L1    | 0.168589408 |
| 14,012 | VPS33A    | 0.168613765 |
| 14,013 | CYP8B1    | 0.169082406 |
| 14,014 | DPEP1     | 0.169781365 |
| 14,015 | MT1H      | 0.169932046 |
| 14,016 | SHARPIN   | 0.169945395 |
| 14,017 | SP100     | 0.170539962 |
| 14,018 | LOC136263 | 0.1706341   |
| 14,019 | C20ORF81  | 0.170809108 |
| 14,020 | PTGDR     | 0.170880649 |
| 14,021 | SIVA      | 0.171115597 |
| 14,022 | PLDN      | 0.172287071 |
| 14,023 | EHMT2     | 0.172437208 |
| 14,024 | ZNF589    | 0.172615896 |
| 14,025 | ZFP1      | 0.172720522 |
| 14,026 | PDZK4     | 0.173451539 |
| 14,027 | RELN      | 0.173486409 |
| 14,028 | PARP11    | 0.17348737  |
| 14,029 | SDS       | 0.173837775 |
| 14,030 | M96       | 0.174123925 |
| 14,031 | CCDC8     | 0.17420219  |
| 14,032 | USP51     | 0.174267603 |
| 14,033 | GALGT     | 0.174275819 |
| 14,034 | RFC2      | 0.17430814  |
| 14,035 | LAMA2     | 0.174729945 |
| 14,036 | C6ORF159  | 0.17478885  |
| 14,037 | PCDHA8    | 0.174833603 |
| 14,038 | GH2       | 0.174967171 |
| 14,039 | KIAA1706  | 0.174998473 |
| 14,040 | FLJ36748  | 0.175033333 |
| 14,041 | MOV10     | 0.17507822  |

|        |                 |             |
|--------|-----------------|-------------|
| 14,042 | <i>FUT2</i>     | 0.175381937 |
| 14,043 | <i>KCNG2</i>    | 0.175432607 |
| 14,044 | <i>SMAD2</i>    | 0.175468379 |
| 14,045 | <i>MI-ER1</i>   | 0.176040127 |
| 14,046 | <i>AR</i>       | 0.177010946 |
| 14,047 | <i>P66BETA</i>  | 0.177183493 |
| 14,048 | <i>HMGCL</i>    | 0.177226501 |
| 14,049 | <i>HLA-A</i>    | 0.177239955 |
| 14,050 | <i>A1BG</i>     | 0.177415033 |
| 14,051 | <i>ZAR1</i>     | 0.177565357 |
| 14,052 | <i>NVL</i>      | 0.177766242 |
| 14,053 | <i>CNTNAP5</i>  | 0.177804612 |
| 14,054 | <i>FLJ40452</i> | 0.177964935 |
| 14,055 | <i>ICK</i>      | 0.178077679 |
| 14,056 | <i>GPX4</i>     | 0.178232291 |
| 14,057 | <i>GPR82</i>    | 0.178528387 |
| 14,058 | <i>KIAA0152</i> | 0.17876021  |
| 14,059 | <i>ICA1</i>     | 0.179148073 |
| 14,060 | <i>OR5M9</i>    | 0.179325907 |
| 14,061 | <i>CLECSF2</i>  | 0.179329795 |
| 14,062 | <i>KIAA0103</i> | 0.179581858 |
| 14,063 | <i>TBRG1</i>    | 0.179647994 |
| 14,064 | <i>KDELR2</i>   | 0.179656313 |
| 14,065 | <i>NAPB</i>     | 0.179788449 |
| 14,066 | <i>MEF2C</i>    | 0.17981701  |
| 14,067 | <i>ETV5</i>     | 0.179842353 |
| 14,068 | <i>NDUFB10</i>  | 0.179899623 |
| 14,069 | <i>CREB3L3</i>  | 0.180028085 |
| 14,070 | <i>IL17B</i>    | 0.180107322 |
| 14,071 | <i>SMBP</i>     | 0.180351413 |
| 14,072 | <i>SSTR2</i>    | 0.180409433 |
| 14,073 | <i>FLJ31606</i> | 0.180602143 |
| 14,074 | <i>NYX</i>      | 0.180748281 |
| 14,075 | <i>SPEG</i>     | 0.180901369 |
| 14,076 | <i>HIST1H4J</i> | 0.18095144  |
| 14,077 | <i>KIAA1950</i> | 0.181445729 |
| 14,078 | <i>DNAJB8</i>   | 0.181609352 |
| 14,079 | <i>CYP2C8</i>   | 0.181621772 |
| 14,080 | <i>ECE2</i>     | 0.182641383 |
| 14,081 | <i>PHF21A</i>   | 0.18279904  |
| 14,082 | <i>FOXJ2</i>    | 0.184064475 |
| 14,083 | <i>ORM1</i>     | 0.184079098 |
| 14,084 | <i>TOPK</i>     | 0.184082676 |
| 14,085 | <i>PDCD11</i>   | 0.184365292 |
| 14,086 | <i>RASD2</i>    | 0.184681929 |
| 14,087 | <i>MTUS1</i>    | 0.184691494 |
| 14,088 | <i>GNG10</i>    | 0.185066336 |

|        |                      |             |
|--------|----------------------|-------------|
| 14,089 | <i>PPFIA4</i>        | 0.185226382 |
| 14,090 | <i>LOC124842</i>     | 0.18531898  |
| 14,091 | <i>RAB6IP1</i>       | 0.185741886 |
| 14,092 | <i>TTYH3</i>         | 0.186122028 |
| 14,093 | <i>ABHD6</i>         | 0.186190585 |
| 14,094 | <i>CPEB4</i>         | 0.186500036 |
| 14,095 | <i>LOC387755</i>     | 0.186776493 |
| 14,096 | <i>KIAA0513</i>      | 0.186996241 |
| 14,097 | <i>C6ORF188</i>      | 0.187214913 |
| 14,098 | <i>MNAT1</i>         | 0.188253353 |
| 14,099 | <i>CYP20A1</i>       | 0.188370774 |
| 14,100 | <i>DCUN1D3</i>       | 0.188549936 |
| 14,101 | <i>PLCG2</i>         | 0.18886895  |
| 14,102 | <i>UNQ470</i>        | 0.189035499 |
| 14,103 | <i>OR9G9</i>         | 0.189247208 |
| 14,104 | <i>DKFZP761B1514</i> | 0.18968383  |
| 14,105 | <i>DNMT3L</i>        | 0.18979251  |
| 14,106 | <i>CYP3A4</i>        | 0.189931716 |
| 14,107 | <i>RYR3</i>          | 0.190202929 |
| 14,108 | <i>H2BFWT</i>        | 0.19021521  |
| 14,109 | <i>EGR3</i>          | 0.190273083 |
| 14,110 | <i>LOC92305</i>      | 0.19099382  |
| 14,111 | <i>DKFZP451J0118</i> | 0.191252745 |
| 14,112 | <i>ZNF75A</i>        | 0.19135503  |
| 14,113 | <i>PITRM1</i>        | 0.191554145 |
| 14,114 | <i>C11ORF11</i>      | 0.191924771 |
| 14,115 | <i>FGF19</i>         | 0.192496688 |
| 14,116 | <i>PRSS21</i>        | 0.192679285 |
| 14,117 | <i>OR2A12</i>        | 0.19376234  |
| 14,118 | <i>SEMA3D</i>        | 0.194066275 |
| 14,119 | <i>ZNF611</i>        | 0.194220763 |
| 14,120 | <i>C6ORF182</i>      | 0.194383332 |
| 14,121 | <i>THAP10</i>        | 0.194393143 |
| 14,122 | <i>NDUFA8</i>        | 0.194394366 |
| 14,123 | <i>CRSP2</i>         | 0.194479055 |
| 14,124 | <i>TTR</i>           | 0.194734725 |
| 14,125 | <i>NTN1</i>          | 0.194882207 |
| 14,126 | <i>FLJ12788</i>      | 0.19489573  |
| 14,127 | <i>PCDHGC5</i>       | 0.194909089 |
| 14,128 | <i>VAV1</i>          | 0.194957052 |
| 14,129 | <i>CXCL2</i>         | 0.195117738 |
| 14,130 | <i>MGC88387</i>      | 0.195291151 |
| 14,131 | <i>NEK5</i>          | 0.195388563 |
| 14,132 | <i>LOC57146</i>      | 0.19602406  |
| 14,133 | <i>GNAT1</i>         | 0.196082747 |
| 14,134 | <i>NUP153</i>        | 0.196253491 |
| 14,135 | <i>FAM33A</i>        | 0.196314295 |

|        |          |             |
|--------|----------|-------------|
| 14,136 | FAM33A   | 0.196314295 |
| 14,137 | PTPN23   | 0.197082886 |
| 14,138 | C10ORF6  | 0.197193423 |
| 14,139 | BCAN     | 0.197306433 |
| 14,140 | PTCHD3   | 0.197497239 |
| 14,141 | SAP130   | 0.197867593 |
| 14,142 | PRC1     | 0.198416785 |
| 14,143 | MGC13125 | 0.198724989 |
| 14,144 | C20ORF54 | 0.198994845 |
| 14,145 | APEX2    | 0.199167064 |
| 14,146 | DEDD     | 0.199181201 |
| 14,147 | GLTSCR1  | 0.199772258 |
| 14,148 | LIFR     | 0.200070123 |
| 14,149 | ANKRD23  | 0.200213799 |
| 14,150 | TRIM72   | 0.200398731 |
| 14,151 | VPS13D   | 0.200617237 |
| 14,152 | PNUTL1   | 0.200675035 |
| 14,153 | SIAT9    | 0.200872626 |
| 14,154 | METTL4   | 0.201835501 |
| 14,155 | ELL      | 0.201953945 |
| 14,156 | PPM1L    | 0.201973694 |
| 14,157 | POLR2L   | 0.202214588 |
| 14,158 | STAG2    | 0.203060636 |
| 14,159 | RBM14    | 0.203261972 |
| 14,160 | KRT1     | 0.203360174 |
| 14,161 | NALP2    | 0.203453073 |
| 14,162 | TRIP15   | 0.20352638  |
| 14,163 | COL11A2  | 0.203606708 |
| 14,164 | P4HA2    | 0.203643355 |
| 14,165 | CASKIN1  | 0.203954479 |
| 14,166 | PI16     | 0.203959343 |
| 14,167 | GPR124   | 0.203996526 |
| 14,168 | GGA3     | 0.204881522 |
| 14,169 | ZNF229   | 0.205041129 |
| 14,170 | DNAJA2   | 0.205083221 |
| 14,171 | HSPA14   | 0.205407834 |
| 14,172 | SPRED1   | 0.205585256 |
| 14,173 | NALP11   | 0.205853406 |
| 14,174 | CAT      | 0.205871336 |
| 14,175 | RNF44    | 0.206263236 |
| 14,176 | QPCT     | 0.206411133 |
| 14,177 | PHYHIPL  | 0.206598771 |
| 14,178 | ARHGEF6  | 0.207253201 |
| 14,179 | SLC2A6   | 0.207410535 |
| 14,180 | PFKFB3   | 0.207588182 |
| 14,181 | UBL4     | 0.207771428 |
| 14,182 | UBE2D1   | 0.207778825 |

|        |           |             |
|--------|-----------|-------------|
| 14,183 | WASF2     | 0.208231838 |
| 14,184 | INSM1     | 0.208320391 |
| 14,185 | GBP3      | 0.208489887 |
| 14,186 | OR4C12    | 0.208589164 |
| 14,187 | ZNF189    | 0.208742144 |
| 14,188 | PSME1     | 0.208907518 |
| 14,189 | CHRNA2    | 0.208918826 |
| 14,190 | LOC388581 | 0.209316569 |
| 14,191 | PF20      | 0.209656365 |
| 14,192 | CMA1      | 0.209912798 |
| 14,193 | RASGRP2   | 0.209913017 |
| 14,194 | GNAL      | 0.209974381 |
| 14,195 | AGMAT     | 0.210659931 |
| 14,196 | IRF4      | 0.21087239  |
| 14,197 | LY6G6D    | 0.21105675  |
| 14,198 | FLJ32110  | 0.211113339 |
| 14,199 | EEF1G     | 0.211286253 |
| 14,200 | BAF53A    | 0.212449958 |
| 14,201 | ZNHIT4    | 0.212845083 |
| 14,202 | UTRN      | 0.213015429 |
| 14,203 | C18ORF10  | 0.213437104 |
| 14,204 | GRM4      | 0.213556754 |
| 14,205 | ZNF306    | 0.21423148  |
| 14,206 | ATP1B3    | 0.214399887 |
| 14,207 | KIAA1078  | 0.214404844 |
| 14,208 | KRTAP12-1 | 0.214635494 |
| 14,209 | ARHGAP25  | 0.214774071 |
| 14,210 | APOB      | 0.215149496 |
| 14,211 | RBM9      | 0.215384101 |
| 14,212 | TAS2R14   | 0.215408099 |
| 14,213 | DRG1      | 0.215572246 |
| 14,214 | ERCC1     | 0.216079189 |
| 14,215 | ANKK1     | 0.216142848 |
| 14,216 | FLJ11795  | 0.216507215 |
| 14,217 | TIMM23    | 0.216576047 |
| 14,218 | KLHL10    | 0.216624084 |
| 14,219 | ZDHHC23   | 0.216764612 |
| 14,220 | THEA      | 0.216873223 |
| 14,221 | KCNS1     | 0.217149993 |
| 14,222 | CXCL5     | 0.217160369 |
| 14,223 | FLJ22490  | 0.217202508 |
| 14,224 | OR7A10    | 0.217725806 |
| 14,225 | RGS17     | 0.218225952 |
| 14,226 | LYG2      | 0.218269767 |
| 14,227 | DNASE1L2  | 0.218270549 |
| 14,228 | DLX1      | 0.218384322 |
| 14,229 | NLGN4Y    | 0.218620121 |

|        |                      |             |
|--------|----------------------|-------------|
| 14,230 | <i>THG-1</i>         | 0.219207147 |
| 14,231 | <i>EPM2AIP1</i>      | 0.219317832 |
| 14,232 | <i>ZNF608</i>        | 0.21946098  |
| 14,233 | <i>C1ORF27</i>       | 0.219555912 |
| 14,234 | <i>PODN</i>          | 0.220586907 |
| 14,235 | <i>EVI1</i>          | 0.220869745 |
| 14,236 | <i>HIST1H4D</i>      | 0.221024989 |
| 14,237 | <i>UPB1</i>          | 0.221828745 |
| 14,238 | <i>LUC7L</i>         | 0.221860545 |
| 14,239 | <i>KIAA0319</i>      | 0.221959289 |
| 14,240 | <i>GCLC</i>          | 0.222062095 |
| 14,241 | <i>ACTN2</i>         | 0.222092791 |
| 14,242 | <i>HTR3E</i>         | 0.222289428 |
| 14,243 | <i>DKFZP564B1023</i> | 0.222691564 |
| 14,244 | <i>OR10W1</i>        | 0.223469069 |
| 14,245 | <i>FLI32191</i>      | 0.223826045 |
| 14,246 | <i>MRAS</i>          | 0.223842591 |
| 14,247 | <i>PLCD4</i>         | 0.224285712 |
| 14,248 | <i>DHH</i>           | 0.224444942 |
| 14,249 | <i>BRCA1</i>         | 0.224554357 |
| 14,250 | <i>GMEB1</i>         | 0.224691267 |
| 14,251 | <i>MYO5A</i>         | 0.224812236 |
| 14,252 | <i>UNC5D</i>         | 0.225068323 |
| 14,253 | <i>PAPOLB</i>        | 0.225098531 |
| 14,254 | <i>C6ORF209</i>      | 0.225111802 |
| 14,255 | <i>SPIB</i>          | 0.225210581 |
| 14,256 | <i>TBL1XR1</i>       | 0.22554658  |
| 14,257 | <i>PSMB9</i>         | 0.22568308  |
| 14,258 | <i>ACY1L2</i>        | 0.225705196 |
| 14,259 | <i>EBAF</i>          | 0.225739323 |
| 14,260 | <i>TNRC4</i>         | 0.225805149 |
| 14,261 | <i>GPI</i>           | 0.225843252 |
| 14,262 | <i>AUP1</i>          | 0.225892593 |
| 14,263 | <i>AKIP</i>          | 0.226401632 |
| 14,264 | <i>DEFB107A</i>      | 0.226404221 |
| 14,265 | <i>POLR3F</i>        | 0.226922293 |
| 14,266 | <i>GPC2</i>          | 0.227331553 |
| 14,267 | <i>CDK9</i>          | 0.227489667 |
| 14,268 | <i>EXOSC9</i>        | 0.227534863 |
| 14,269 | <i>TXNDC4</i>        | 0.227762253 |
| 14,270 | <i>SERPINB1</i>      | 0.228261046 |
| 14,271 | <i>CSN2</i>          | 0.228440597 |
| 14,272 | <i>MCOLN2</i>        | 0.229464647 |
| 14,273 | <i>PELI2</i>         | 0.230146599 |
| 14,274 | <i>FSTL5</i>         | 0.230146599 |
| 14,275 | <i>TAF9L</i>         | 0.230259302 |
| 14,276 | <i>PNLIP</i>         | 0.230336002 |



|        |                     |             |
|--------|---------------------|-------------|
| 14,277 | <i>C20ORF44</i>     | 0.230382281 |
| 14,278 | <i>USP53</i>        | 0.230693446 |
| 14,279 | <i>FAM3D</i>        | 0.230744716 |
| 14,280 | <i>MESP2</i>        | 0.230786025 |
| 14,281 | <i>MGP</i>          | 0.230997081 |
| 14,282 | <i>C19ORF21</i>     | 0.231161066 |
| 14,283 | <i>OASL</i>         | 0.231173639 |
| 14,284 | <i>TMC5</i>         | 0.231217209 |
| 14,285 | <i>PDPR</i>         | 0.231401162 |
| 14,286 | <i>BTNL8</i>        | 0.231467487 |
| 14,287 | <i>MRPL43</i>       | 0.231878722 |
| 14,288 | <i>MGC41943</i>     | 0.232311175 |
| 14,289 | <i>DLG1</i>         | 0.232318188 |
| 14,290 | <i>C9ORF79</i>      | 0.23290385  |
| 14,291 | <i>TFCP2L3</i>      | 0.233063848 |
| 14,292 | <i>HSHIN6</i>       | 0.233106301 |
| 14,293 | <i>STAC3</i>        | 0.233339548 |
| 14,294 | <i>DKFZP762K222</i> | 0.233400137 |
| 14,295 | <i>PIGO</i>         | 0.233819987 |
| 14,296 | <i>PCDH15</i>       | 0.233944955 |
| 14,297 | <i>CCAR1</i>        | 0.234058711 |
| 14,298 | <i>TSPAN13</i>      | 0.234340596 |
| 14,299 | <i>CRYGA</i>        | 0.234404675 |
| 14,300 | <i>FUT9</i>         | 0.234589611 |
| 14,301 | <i>MRPL13</i>       | 0.234700658 |
| 14,302 | <i>GSTM2</i>        | 0.234999272 |
| 14,303 | <i>GIT1</i>         | 0.235013942 |
| 14,304 | <i>LOC114990</i>    | 0.235230873 |
| 14,305 | <i>ZNF622</i>       | 0.235425395 |
| 14,306 | <i>OR4F3</i>        | 0.235515489 |
| 14,307 | <i>ACTN4</i>        | 0.235675351 |
| 14,308 | <i>FLJ20254</i>     | 0.236546624 |
| 14,309 | <i>FZD6</i>         | 0.23661075  |
| 14,310 | <i>RFC3</i>         | 0.236724074 |
| 14,311 | <i>SEPW1</i>        | 0.237238319 |
| 14,312 | <i>SEPT11</i>       | 0.237695513 |
| 14,313 | <i>SOS1</i>         | 0.237765012 |
| 14,314 | <i>PPIH</i>         | 0.238709324 |
| 14,315 | <i>GFRA1</i>        | 0.238899943 |
| 14,316 | <i>MGC33309</i>     | 0.239055282 |
| 14,317 | <i>HN1</i>          | 0.239554767 |
| 14,318 | <i>KIAA1446</i>     | 0.239746957 |
| 14,319 | <i>MGRN1</i>        | 0.239854016 |
| 14,320 | <i>POLR3H</i>       | 0.240457333 |
| 14,321 | <i>BPNT1</i>        | 0.240951951 |
| 14,322 | <i>ZNF451</i>       | 0.241115611 |
| 14,323 | <i>ARPC1B</i>       | 0.241241576 |

|        |                     |             |
|--------|---------------------|-------------|
| 14,324 | <i>ADRB1</i>        | 0.241351788 |
| 14,325 | <i>KLHL2</i>        | 0.241574552 |
| 14,326 | <i>ARL10C</i>       | 0.24158467  |
| 14,327 | <i>LOC255743</i>    | 0.24174406  |
| 14,328 | <i>SPATA12</i>      | 0.241813036 |
| 14,329 | <i>MAN2C1</i>       | 0.241945062 |
| 14,330 | <i>OR8D2</i>        | 0.242234138 |
| 14,331 | <i>KLKB1</i>        | 0.242596997 |
| 14,332 | <i>RGL2</i>         | 0.242694105 |
| 14,333 | <i>CHEK1</i>        | 0.242748079 |
| 14,334 | <i>ARPC2</i>        | 0.243028877 |
| 14,335 | <i>GIF</i>          | 0.243390473 |
| 14,336 | <i>F2R</i>          | 0.243496825 |
| 14,337 | <i>RAB3B</i>        | 0.243527087 |
| 14,338 | <i>CHERP</i>        | 0.243992661 |
| 14,339 | <i>RBM10</i>        | 0.24425366  |
| 14,340 | <i>EPB41L3</i>      | 0.244551458 |
| 14,341 | <i>DMRTC2</i>       | 0.244553622 |
| 14,342 | <i>N4BP3</i>        | 0.244564735 |
| 14,343 | <i>ARF4</i>         | 0.244870409 |
| 14,344 | <i>PRKCG</i>        | 0.244935497 |
| 14,345 | <i>RSPRY1</i>       | 0.245591387 |
| 14,346 | <i>LAIR1</i>        | 0.245694634 |
| 14,347 | <i>ZCCHC9</i>       | 0.245922912 |
| 14,348 | <i>DKFZP547H025</i> | 0.245947392 |
| 14,349 | <i>TRIM2</i>        | 0.246158342 |
| 14,350 | <i>TDRD5</i>        | 0.246279868 |
| 14,351 | <i>CACNA1S</i>      | 0.246462613 |
| 14,352 | <i>PTPN4</i>        | 0.246731997 |
| 14,353 | <i>ECHS1</i>        | 0.247289935 |
| 14,354 | <i>KIAA1463</i>     | 0.247696637 |
| 14,355 | <i>GTF2H3</i>       | 0.247967375 |
| 14,356 | <i>POLA2</i>        | 0.248014272 |
| 14,357 | <i>FLJ32800</i>     | 0.248499219 |
| 14,358 | <i>MEST</i>         | 0.248521415 |
| 14,359 | <i>NS</i>           | 0.248579014 |
| 14,360 | <i>PPAPDC1</i>      | 0.248874197 |
| 14,361 | <i>MRPL52</i>       | 0.249033003 |
| 14,362 | <i>ZNF202</i>       | 0.249510519 |
| 14,363 | <i>WNT16</i>        | 0.249667811 |
| 14,364 | <i>FBXL4</i>        | 0.249944746 |
| 14,365 | <i>CYFIP2</i>       | 0.25049335  |
| 14,366 | <i>PDZK1</i>        | 0.25069458  |
| 14,367 | <i>MGC4268</i>      | 0.250820396 |
| 14,368 | <i>LOC387923</i>    | 0.251124513 |
| 14,369 | <i>CYP7A1</i>       | 0.251167672 |
| 14,370 | <i>MGC45491</i>     | 0.251228862 |

|        |                   |             |
|--------|-------------------|-------------|
| 14,371 | <i>EMP1</i>       | 0.251369369 |
| 14,372 | <i>SLC25A13</i>   | 0.252349738 |
| 14,373 | <i>H-PLK</i>      | 0.252610714 |
| 14,374 | <i>AP4S1</i>      | 0.252865265 |
| 14,375 | <i>OR52N2</i>     | 0.252897612 |
| 14,376 | <i>CSTF1</i>      | 0.252918848 |
| 14,377 | <i>CCRN4L</i>     | 0.253155199 |
| 14,378 | <i>DNCL1</i>      | 0.253187713 |
| 14,379 | <i>AP1S3</i>      | 0.253341345 |
| 14,380 | <i>C1ORF36</i>    | 0.253646259 |
| 14,381 | <i>ELK1</i>       | 0.254016733 |
| 14,382 | <i>POLR3G</i>     | 0.254238371 |
| 14,383 | <i>C20ORF28</i>   | 0.254928997 |
| 14,384 | <i>ZFP42</i>      | 0.255405692 |
| 14,385 | <i>ZMYM3</i>      | 0.255487738 |
| 14,386 | <i>HAPLN2</i>     | 0.255782717 |
| 14,387 | <i>PHLDA2</i>     | 0.255938982 |
| 14,388 | <i>TRIM6</i>      | 0.256209633 |
| 14,389 | <i>COG1</i>       | 0.256316314 |
| 14,390 | <i>ATAD1</i>      | 0.256384551 |
| 14,391 | <i>RP1-14N1.3</i> | 0.256458944 |
| 14,392 | <i>NDRG4</i>      | 0.257028755 |
| 14,393 | <i>PRDM7</i>      | 0.257132309 |
| 14,394 | <i>MGC14327</i>   | 0.257263512 |
| 14,395 | <i>HLF</i>        | 0.257396047 |
| 14,396 | <i>KRT18</i>      | 0.25750669  |
| 14,397 | <i>REG1B</i>      | 0.258309343 |
| 14,398 | <i>UQCRH</i>      | 0.258532665 |
| 14,399 | <i>CTSG</i>       | 0.25872549  |
| 14,400 | <i>KIF12</i>      | 0.258996175 |
| 14,401 | <i>FLJ37300</i>   | 0.259324292 |
| 14,402 | <i>FLJ10587</i>   | 0.259512148 |
| 14,403 | <i>P2RX4</i>      | 0.259550918 |
| 14,404 | <i>HHEX</i>       | 0.25962947  |
| 14,405 | <i>ZNF75</i>      | 0.260074774 |
| 14,406 | <i>CHUK</i>       | 0.260103445 |
| 14,407 | <i>KIAA1271</i>   | 0.260450357 |
| 14,408 | <i>RPS6KA4</i>    | 0.260935041 |
| 14,409 | <i>MAP3K10</i>    | 0.260993592 |
| 14,410 | <i>LPHN1</i>      | 0.261780899 |
| 14,411 | <i>BTBD6</i>      | 0.261889489 |
| 14,412 | <i>GOLGA4</i>     | 0.262191561 |
| 14,413 | <i>MGC45840</i>   | 0.262334076 |
| 14,414 | <i>MGC39518</i>   | 0.26242139  |
| 14,415 | <i>FST</i>        | 0.262462211 |
| 14,416 | <i>FLJ11184</i>   | 0.262549623 |
| 14,417 | <i>TINAG</i>      | 0.262609332 |

|        |                  |             |
|--------|------------------|-------------|
| 14,418 | <i>LCMR1</i>     | 0.262613311 |
| 14,419 | <i>C9ORF68</i>   | 0.262773951 |
| 14,420 | <i>PCLKC</i>     | 0.263235479 |
| 14,421 | <i>AGPAT5</i>    | 0.263277927 |
| 14,422 | <i>UPLP</i>      | 0.263913641 |
| 14,423 | <i>LOC157708</i> | 0.263965811 |
| 14,424 | <i>CATSPER4</i>  | 0.264378401 |
| 14,425 | <i>PLEKHA3</i>   | 0.264738877 |
| 14,426 | <i>TMCC2</i>     | 0.264748753 |
| 14,427 | <i>NEDD8</i>     | 0.265062848 |
| 14,428 | <i>PTD012</i>    | 0.265742178 |
| 14,429 | <i>HERC3</i>     | 0.265892799 |
| 14,430 | <i>S100A9</i>    | 0.265992286 |
| 14,431 | <i>TRAF6</i>     | 0.266113923 |
| 14,432 | <i>LAMB2</i>     | 0.266229895 |
| 14,433 | <i>FLI36155</i>  | 0.26630652  |
| 14,434 | <i>KIAA0265</i>  | 0.267070636 |
| 14,435 | <i>CCNF</i>      | 0.267227827 |
| 14,436 | <i>TBC1D19</i>   | 0.267329816 |
| 14,437 | <i>FNBP4</i>     | 0.267528092 |
| 14,438 | <i>ICAM4</i>     | 0.267535376 |
| 14,439 | <i>ZNRF3</i>     | 0.267584646 |
| 14,440 | <i>COX10</i>     | 0.267671007 |
| 14,441 | <i>LOC552889</i> | 0.267754087 |
| 14,442 | <i>EID2</i>      | 0.268155688 |
| 14,443 | <i>KRAS2</i>     | 0.268233386 |
| 14,444 | <i>HOXA7</i>     | 0.268264596 |
| 14,445 | <i>FLI20859</i>  | 0.268642338 |
| 14,446 | <i>CATSPER2</i>  | 0.269035512 |
| 14,447 | <i>GABRG1</i>    | 0.269062036 |
| 14,448 | <i>LOC388633</i> | 0.269231814 |
| 14,449 | <i>ANXA8</i>     | 0.269528631 |
| 14,450 | <i>INMT</i>      | 0.269594589 |
| 14,451 | <i>FHR-4</i>     | 0.270082898 |
| 14,452 | <i>CREBBP</i>    | 0.270122574 |
| 14,453 | <i>OTEX</i>      | 0.270144697 |
| 14,454 | <i>CENTG3</i>    | 0.270330107 |
| 14,455 | <i>CCL4L1</i>    | 0.271270442 |
| 14,456 | <i>GSTM3</i>     | 0.271277824 |
| 14,457 | <i>SLC36A4</i>   | 0.271603891 |
| 14,458 | <i>VN1R1</i>     | 0.271658871 |
| 14,459 | <i>PPP2CZ</i>    | 0.272098155 |
| 14,460 | <i>ADRA2A</i>    | 0.272402094 |
| 14,461 | <i>C9ORF55</i>   | 0.272552883 |
| 14,462 | <i>ZNF390</i>    | 0.272643234 |
| 14,463 | <i>SSSCA1</i>    | 0.272715638 |
| 14,464 | <i>KIAA0971</i>  | 0.273516428 |

|        |                      |             |
|--------|----------------------|-------------|
| 14,465 | <i>GSTA5</i>         | 0.274452234 |
| 14,466 | <i>PRSS15</i>        | 0.274520084 |
| 14,467 | <i>ABCC6</i>         | 0.274553243 |
| 14,468 | <i>RP11-196G18.6</i> | 0.275103253 |
| 14,469 | <i>DCI</i>           | 0.275340881 |
| 14,470 | <i>PJA1</i>          | 0.275802621 |
| 14,471 | <i>RALBP1</i>        | 0.27590282  |
| 14,472 | <i>PECI</i>          | 0.27623129  |
| 14,473 | <i>C9ORF86</i>       | 0.276281508 |
| 14,474 | <i>KRT76</i>         | 0.276639983 |
| 14,475 | <i>REL</i>           | 0.27688299  |
| 14,476 | <i>IRF4</i>          | 0.277030937 |
| 14,477 | <i>TP53RK</i>        | 0.277448182 |
| 14,478 | <i>TOSO</i>          | 0.277706828 |
| 14,479 | <i>LOC63928</i>      | 0.27782075  |
| 14,480 | <i>C1ORF14</i>       | 0.278243203 |
| 14,481 | <i>SOX13</i>         | 0.278742611 |
| 14,482 | <i>DEADC1</i>        | 0.279003771 |
| 14,483 | <i>ABCA13</i>        | 0.279009518 |
| 14,484 | <i>ITM2C</i>         | 0.279028718 |
| 14,485 | <i>SERPINB8</i>      | 0.279268229 |
| 14,486 | <i>MMP25</i>         | 0.279458442 |
| 14,487 | <i>DRD1IP</i>        | 0.279815968 |
| 14,488 | <i>EPHX1</i>         | 0.280026674 |
| 14,489 | <i>PRIMA1</i>        | 0.280088384 |
| 14,490 | <i>SUHW3</i>         | 0.28014777  |
| 14,491 | <i>C20orf186</i>     | 0.280427188 |
| 14,492 | <i>CDK5RAP1</i>      | 0.28044588  |
| 14,493 | <i>C14ORF152</i>     | 0.281078028 |
| 14,494 | <i>LOC652968</i>     | 0.281109435 |
| 14,495 | <i>FLJ23560</i>      | 0.281421067 |
| 14,496 | <i>FLJ20701</i>      | 0.281436913 |
| 14,497 | <i>YIPF2</i>         | 0.281542464 |
| 14,498 | <i>OPTC</i>          | 0.281852205 |
| 14,499 | <i>FLJ32771</i>      | 0.281964657 |
| 14,500 | <i>COX6B2</i>        | 0.281984014 |
| 14,501 | <i>NICAL</i>         | 0.282229722 |
| 14,502 | <i>PP1665</i>        | 0.282709989 |
| 14,503 | <i>LOC222967</i>     | 0.282737747 |
| 14,504 | <i>ALDOC</i>         | 0.2829542   |
| 14,505 | <i>HD</i>            | 0.283454897 |
| 14,506 | <i>SLC6A9</i>        | 0.283484971 |
| 14,507 | <i>ZNF551</i>        | 0.283711681 |
| 14,508 | <i>DHRS9</i>         | 0.283789014 |
| 14,509 | <i>PRKR</i>          | 0.283990368 |
| 14,510 | <i>SNX9</i>          | 0.284059863 |
| 14,511 | <i>CGI-01</i>        | 0.284128219 |

|        |                  |             |
|--------|------------------|-------------|
| 14,512 | <i>OR6T1</i>     | 0.284183625 |
| 14,513 | <i>RAB1A</i>     | 0.284796279 |
| 14,514 | <i>CCL11</i>     | 0.285405019 |
| 14,515 | <i>MADD</i>      | 0.285947822 |
| 14,516 | <i>RPH3AL</i>    | 0.286808311 |
| 14,517 | <i>LY86</i>      | 0.287033572 |
| 14,518 | <i>AK2</i>       | 0.287184978 |
| 14,519 | <i>LRRC10</i>    | 0.287793529 |
| 14,520 | <i>SLC25A19</i>  | 0.288159603 |
| 14,521 | <i>MRPL55</i>    | 0.288256409 |
| 14,522 | <i>FLJ45651</i>  | 0.288336286 |
| 14,523 | <i>PFAAP5</i>    | 0.289127926 |
| 14,524 | <i>C2ORF25</i>   | 0.290249382 |
| 14,525 | <i>PSD</i>       | 0.291179096 |
| 14,526 | <i>TMEM43</i>    | 0.291634869 |
| 14,527 | <i>SNRPD3</i>    | 0.291750154 |
| 14,528 | <i>PDCL</i>      | 0.29226064  |
| 14,529 | <i>PUM1</i>      | 0.292287385 |
| 14,530 | <i>NANOG</i>     | 0.292377865 |
| 14,531 | <i>LOC91689</i>  | 0.292510931 |
| 14,532 | <i>TDRD1</i>     | 0.292872327 |
| 14,533 | <i>RAB4A</i>     | 0.293367104 |
| 14,534 | <i>HAPLN1</i>    | 0.293512551 |
| 14,535 | <i>NXF3</i>      | 0.294552374 |
| 14,536 | <i>MGAT4A</i>    | 0.294675158 |
| 14,537 | <i>FLJ25414</i>  | 0.294997257 |
| 14,538 | <i>ALAS1</i>     | 0.295088021 |
| 14,539 | <i>IL22RA2</i>   | 0.295100611 |
| 14,540 | <i>MC5R</i>      | 0.295473822 |
| 14,541 | <i>TESSP5</i>    | 0.296864868 |
| 14,542 | <i>ZDHHC16</i>   | 0.296982941 |
| 14,543 | <i>SRRM1</i>     | 0.297642151 |
| 14,544 | <i>KRTAP13-1</i> | 0.297676994 |
| 14,545 | <i>CANT1</i>     | 0.297720079 |
| 14,546 | <i>OR13C5</i>    | 0.297784579 |
| 14,547 | <i>SLC35C1</i>   | 0.29819848  |
| 14,548 | <i>SPATC1</i>    | 0.298279823 |
| 14,549 | <i>FLJ45910</i>  | 0.298336558 |
| 14,550 | <i>GDF8</i>      | 0.298721697 |
| 14,551 | <i>C14ORF120</i> | 0.298766345 |
| 14,552 | <i>BRCC2</i>     | 0.298833249 |
| 14,553 | <i>CA11</i>      | 0.298861149 |
| 14,554 | <i>ASCL4</i>     | 0.299228337 |
| 14,555 | <i>TSPYL6</i>    | 0.299609338 |
| 14,556 | <i>IMPA2</i>     | 0.300530884 |
| 14,557 | <i>KIAA0179</i>  | 0.300850517 |
| 14,558 | <i>FLJ13646</i>  | 0.301566537 |

|        |                  |             |
|--------|------------------|-------------|
| 14,559 | <i>DDX11</i>     | 0.301741446 |
| 14,560 | <i>PUSL1</i>     | 0.301745245 |
| 14,561 | <i>GCNT7</i>     | 0.302091845 |
| 14,562 | <i>PTPRD</i>     | 0.302153237 |
| 14,563 | <i>C9ORF5</i>    | 0.302198729 |
| 14,564 | <i>LY6K</i>      | 0.302241431 |
| 14,565 | <i>NALP14</i>    | 0.302853977 |
| 14,566 | <i>IRAK1BP1</i>  | 0.302914613 |
| 14,567 | <i>C20ORF96</i>  | 0.30308435  |
| 14,568 | <i>SIL1</i>      | 0.303384122 |
| 14,569 | <i>MRPS9</i>     | 0.303541114 |
| 14,570 | <i>FLJ20507</i>  | 0.304089294 |
| 14,571 | <i>C17ORF37</i>  | 0.304709909 |
| 14,572 | <i>ANKRD26</i>   | 0.304771837 |
| 14,573 | <i>LOC474170</i> | 0.304845289 |
| 14,574 | <i>DNAJA3</i>    | 0.30490774  |
| 14,575 | <i>FLJ34443</i>  | 0.30507689  |
| 14,576 | <i>MS4A1</i>     | 0.305257106 |
| 14,577 | <i>THRA</i>      | 0.305347433 |
| 14,578 | <i>XKR9</i>      | 0.305456479 |
| 14,579 | <i>FLJ22789</i>  | 0.306134924 |
| 14,580 | <i>C20ORF22</i>  | 0.306242293 |
| 14,581 | <i>RNF180</i>    | 0.30679002  |
| 14,582 | <i>FLJ26443</i>  | 0.306852353 |
| 14,583 | <i>SHFM3</i>     | 0.306856488 |
| 14,584 | <i>TRIP3</i>     | 0.307480191 |
| 14,585 | <i>TNFAIP2</i>   | 0.307519967 |
| 14,586 | <i>MHC2TA</i>    | 0.308128695 |
| 14,587 | <i>HDAC3</i>     | 0.308215961 |
| 14,588 | <i>LOC51234</i>  | 0.308258448 |
| 14,589 | <i>S100P</i>     | 0.308494358 |
| 14,590 | <i>LY75</i>      | 0.308828087 |
| 14,591 | <i>RASGRF1</i>   | 0.309110898 |
| 14,592 | <i>LOC728635</i> | 0.309417626 |
| 14,593 | <i>NFYB</i>      | 0.309458739 |
| 14,594 | <i>GPR43</i>     | 0.309627669 |
| 14,595 | <i>SFRS2</i>     | 0.309806891 |
| 14,596 | <i>FLJ45139</i>  | 0.310163568 |
| 14,597 | <i>C10RF33</i>   | 0.310605518 |
| 14,598 | <i>ANKRD30A</i>  | 0.310723897 |
| 14,599 | <i>PLIN</i>      | 0.31078021  |
| 14,600 | <i>NTF3</i>      | 0.311029576 |
| 14,601 | <i>CAV3</i>      | 0.311114427 |
| 14,602 | <i>OR4F16</i>    | 0.311653682 |
| 14,603 | <i>OR52L1</i>    | 0.311860871 |
| 14,604 | <i>KIAA1826</i>  | 0.312031483 |
| 14,605 | <i>NAT8</i>      | 0.312860121 |

|        |                      |             |
|--------|----------------------|-------------|
| 14,606 | <i>HTR3D</i>         | 0.312972911 |
| 14,607 | <i>LG12</i>          | 0.313339983 |
| 14,608 | <i>FLJ36749</i>      | 0.313974388 |
| 14,609 | <i>SERPINA9</i>      | 0.314454694 |
| 14,610 | <i>BCL2A1</i>        | 0.314466309 |
| 14,611 | <i>C20ORF178</i>     | 0.314709954 |
| 14,612 | <i>HIST1H1T</i>      | 0.31509086  |
| 14,613 | <i>TFAP2B</i>        | 0.316069588 |
| 14,614 | <i>C18ORF1</i>       | 0.316852323 |
| 14,615 | <i>GLMN</i>          | 0.31688508  |
| 14,616 | <i>JRKL</i>          | 0.316921511 |
| 14,617 | <i>MLR2</i>          | 0.317236155 |
| 14,618 | <i>SNAP23</i>        | 0.317582568 |
| 14,619 | <i>TRIB2</i>         | 0.317890789 |
| 14,620 | <i>SLC26A3</i>       | 0.318057789 |
| 14,621 | <i>CCIN</i>          | 0.318138019 |
| 14,622 | <i>KCNE2</i>         | 0.318196819 |
| 14,623 | <i>STK19</i>         | 0.318208729 |
| 14,624 | <i>PTHR2</i>         | 0.318545551 |
| 14,625 | <i>ZNF529</i>        | 0.3185618   |
| 14,626 | <i>RHOH</i>          | 0.319218874 |
| 14,627 | <i>COX6A1</i>        | 0.319491382 |
| 14,628 | <i>MGC27466</i>      | 0.319961188 |
| 14,629 | <i>OR52I2</i>        | 0.320052227 |
| 14,630 | <i>PCDHGA5</i>       | 0.320094012 |
| 14,631 | <i>SYT13</i>         | 0.320192359 |
| 14,632 | <i>MGC48915</i>      | 0.320418393 |
| 14,633 | <i>DAZ</i>           | 0.320617809 |
| 14,634 | <i>DKFZP434G0522</i> | 0.320855172 |
| 14,635 | <i>PRRG1</i>         | 0.321226658 |
| 14,636 | <i>KCTD10</i>        | 0.321489205 |
| 14,637 | <i>ATP1A4</i>        | 0.321696499 |
| 14,638 | <i>SEMA3B</i>        | 0.322283353 |
| 14,639 | <i>AAAS</i>          | 0.322813066 |
| 14,640 | <i>TCF1</i>          | 0.322994194 |
| 14,641 | <i>SSTK</i>          | 0.323137567 |
| 14,642 | <i>OR9A4</i>         | 0.323330276 |
| 14,643 | <i>COQ3</i>          | 0.323695229 |
| 14,644 | <i>C9ORF98</i>       | 0.323744774 |
| 14,645 | <i>C2ORF30</i>       | 0.324233587 |
| 14,646 | <i>FLJ25410</i>      | 0.324289416 |
| 14,647 | <i>CPNE1</i>         | 0.324298348 |
| 14,648 | <i>OR2W1</i>         | 0.324567221 |
| 14,649 | <i>KIAA0117</i>      | 0.324877371 |
| 14,650 | <i>DKFZP564J0123</i> | 0.325128456 |
| 14,651 | <i>ACRV1</i>         | 0.325199636 |
| 14,652 | <i>POLRMT</i>        | 0.325494937 |



|        |                      |             |
|--------|----------------------|-------------|
| 14,653 | <i>SIPA1L1</i>       | 0.32551055  |
| 14,654 | <i>LOC152877</i>     | 0.325707505 |
| 14,655 | <i>COMMD3</i>        | 0.325820712 |
| 14,656 | <i>C6ORF206</i>      | 0.325854324 |
| 14,657 | <i>SCMH1</i>         | 0.325940717 |
| 14,658 | <i>BTG1</i>          | 0.325983799 |
| 14,659 | <i>PDIP</i>          | 0.326291626 |
| 14,660 | <i>KIAA1450</i>      | 0.326533894 |
| 14,661 | <i>OR2Y1</i>         | 0.326937525 |
| 14,662 | <i>AKR1CL1</i>       | 0.327276662 |
| 14,663 | <i>C1ORF54</i>       | 0.327507774 |
| 14,664 | <i>CPLX3</i>         | 0.327816633 |
| 14,665 | <i>MGC5601</i>       | 0.327820298 |
| 14,666 | <i>DAZ2</i>          | 0.329577823 |
| 14,667 | <i>LOC201191</i>     | 0.329630958 |
| 14,668 | <i>DSTN</i>          | 0.330241169 |
| 14,669 | <i>C20ORF98</i>      | 0.331502633 |
| 14,670 | <i>G3BP2</i>         | 0.331778663 |
| 14,671 | <i>OR5AS1</i>        | 0.332407892 |
| 14,672 | <i>OVGP1</i>         | 0.332438085 |
| 14,673 | <i>ARL8</i>          | 0.332442473 |
| 14,674 | <i>C12ORF22</i>      | 0.33246579  |
| 14,675 | <i>IDH3G</i>         | 0.33252581  |
| 14,676 | <i>RPL14</i>         | 0.332668334 |
| 14,677 | <i>OR6V1</i>         | 0.33270777  |
| 14,678 | <i>ALOX12</i>        | 0.332981944 |
| 14,679 | <i>DEFB113</i>       | 0.333100731 |
| 14,680 | <i>OR6A2</i>         | 0.333244417 |
| 14,681 | <i>CXORF1</i>        | 0.333689266 |
| 14,682 | <i>TWIST1</i>        | 0.333791491 |
| 14,683 | <i>MYO3A</i>         | 0.334216311 |
| 14,684 | <i>FLJ44290</i>      | 0.334326848 |
| 14,685 | <i>TBX15</i>         | 0.334769398 |
| 14,686 | <i>MYBL2</i>         | 0.335175224 |
| 14,687 | <i>SRP46</i>         | 0.33528683  |
| 14,688 | <i>PFDN1</i>         | 0.33617481  |
| 14,689 | <i>MGC41945</i>      | 0.336668435 |
| 14,690 | <i>MYBPH</i>         | 0.337345417 |
| 14,691 | <i>GTPBP4</i>        | 0.337353472 |
| 14,692 | <i>BRS3</i>          | 0.337512493 |
| 14,693 | <i>HRMT1L6</i>       | 0.337953024 |
| 14,694 | <i>SFRS11</i>        | 0.337955538 |
| 14,695 | <i>PSMD10</i>        | 0.338246098 |
| 14,696 | <i>NMUR2</i>         | 0.338347657 |
| 14,697 | <i>PGCP</i>          | 0.338474933 |
| 14,698 | <i>IKBKG</i>         | 0.338726392 |
| 14,699 | <i>DKFZP586A0522</i> | 0.338751053 |

|        |                  |             |
|--------|------------------|-------------|
| 14,700 | <i>CDC25A</i>    | 0.33885941  |
| 14,701 | <i>CRSP8</i>     | 0.338928598 |
| 14,702 | <i>NPC1L1</i>    | 0.339065583 |
| 14,703 | <i>TDE1</i>      | 0.339462069 |
| 14,704 | <i>UVRAG</i>     | 0.340068652 |
| 14,705 | <i>NOS1</i>      | 0.340337354 |
| 14,706 | <i>RBM23</i>     | 0.340381317 |
| 14,707 | <i>LOC283687</i> | 0.340929076 |
| 14,708 | <i>ABI3BP</i>    | 0.341488974 |
| 14,709 | <i>ERBB3</i>     | 0.342077055 |
| 14,710 | <i>STAT5B</i>    | 0.342294745 |
| 14,711 | <i>NEGR1</i>     | 0.342833344 |
| 14,712 | <i>FLJ90650</i>  | 0.342930723 |
| 14,713 | <i>ZNF234</i>    | 0.343055026 |
| 14,714 | <i>TPST2</i>     | 0.343402331 |
| 14,715 | <i>STOM</i>      | 0.343845901 |
| 14,716 | <i>FTSJ2</i>     | 0.343910971 |
| 14,717 | <i>ANKRD34</i>   | 0.344431083 |
| 14,718 | <i>OR8G5</i>     | 0.344822318 |
| 14,719 | <i>OCLN</i>      | 0.345035655 |
| 14,720 | <i>KCNA6</i>     | 0.345085769 |
| 14,721 | <i>EIF2C3</i>    | 0.345224014 |
| 14,722 | <i>FBXO15</i>    | 0.345579092 |
| 14,723 | <i>PRPF18</i>    | 0.345587207 |
| 14,724 | <i>MGC4170</i>   | 0.345592667 |
| 14,725 | <i>TRIM5</i>     | 0.346173071 |
| 14,726 | <i>MYCT1</i>     | 0.346874201 |
| 14,727 | <i>CBX5</i>      | 0.347667517 |
| 14,728 | <i>TCEA3</i>     | 0.348189028 |
| 14,729 | <i>PPARBP</i>    | 0.348745042 |
| 14,730 | <i>ZNRF2</i>     | 0.349501565 |
| 14,731 | <i>AOF1</i>      | 0.349775289 |
| 14,732 | <i>CTDP1</i>     | 0.349902369 |
| 14,733 | <i>SPAG8</i>     | 0.350371387 |
| 14,734 | <i>CHCHD3</i>    | 0.350478478 |
| 14,735 | <i>TAS2R10</i>   | 0.350510049 |
| 14,736 | <i>MGC41816</i>  | 0.350596281 |
| 14,737 | <i>COQ6</i>      | 0.350658162 |
| 14,738 | <i>FUT4</i>      | 0.350710581 |
| 14,739 | <i>RAB1B</i>     | 0.350842589 |
| 14,740 | <i>KAI1</i>      | 0.351669116 |
| 14,741 | <i>USP4</i>      | 0.351732255 |
| 14,742 | <i>FREB</i>      | 0.351758878 |
| 14,743 | <i>GJA8</i>      | 0.352979516 |
| 14,744 | <i>FLJ36870</i>  | 0.353020361 |
| 14,745 | <i>ST8SIA6</i>   | 0.353170576 |
| 14,746 | <i>POLR2J</i>    | 0.353250042 |

|        |                      |             |
|--------|----------------------|-------------|
| 14,747 | <i>GAD1</i>          | 0.353549268 |
| 14,748 | <i>ST13</i>          | 0.353640783 |
| 14,749 | <i>APRT</i>          | 0.353661186 |
| 14,750 | <i>SPR</i>           | 0.355035145 |
| 14,751 | <i>MCM3</i>          | 0.355293021 |
| 14,752 | <i>GRSF1</i>         | 0.355726034 |
| 14,753 | <i>COG5</i>          | 0.355970584 |
| 14,754 | <i>MRPL14</i>        | 0.356304813 |
| 14,755 | <i>LOC643418</i>     | 0.356434882 |
| 14,756 | <i>MINPP1</i>        | 0.356699715 |
| 14,757 | <i>HCRTR1</i>        | 0.356845276 |
| 14,758 | <i>TCEAL6</i>        | 0.356870066 |
| 14,759 | <i>FLJ10922</i>      | 0.356901505 |
| 14,760 | <i>HSPA2</i>         | 0.35711951  |
| 14,761 | <i>LOC340069</i>     | 0.357185415 |
| 14,762 | <i>HIST1H3E</i>      | 0.357594083 |
| 14,763 | <i>DNAL4</i>         | 0.357654355 |
| 14,764 | <i>FLJ20105</i>      | 0.357742662 |
| 14,765 | <i>PCDHA4</i>        | 0.358046202 |
| 14,766 | <i>PLA2G4D</i>       | 0.358091152 |
| 14,767 | <i>HTATIP2</i>       | 0.358455606 |
| 14,768 | <i>LCK</i>           | 0.358479547 |
| 14,769 | <i>ZNF151</i>        | 0.359306628 |
| 14,770 | <i>GPR172B</i>       | 0.359540864 |
| 14,771 | <i>CD24</i>          | 0.359580461 |
| 14,772 | <i>ANKRD9</i>        | 0.359912856 |
| 14,773 | <i>CPE</i>           | 0.360177383 |
| 14,774 | <i>BXDC2</i>         | 0.360191028 |
| 14,775 | <i>TIMM17A</i>       | 0.360719544 |
| 14,776 | <i>RPUSD1</i>        | 0.361033076 |
| 14,777 | <i>RFPL3</i>         | 0.361136559 |
| 14,778 | <i>GM2A</i>          | 0.361497565 |
| 14,779 | <i>RENBP</i>         | 0.361720649 |
| 14,780 | <i>ZNF181</i>        | 0.361932517 |
| 14,781 | <i>SEC14L3</i>       | 0.362144184 |
| 14,782 | <i>LOC342933</i>     | 0.362549723 |
| 14,783 | <i>GTF2IRD2</i>      | 0.36276078  |
| 14,784 | <i>RP11-219C24.2</i> | 0.36281884  |
| 14,785 | <i>MTA2</i>          | 0.362885621 |
| 14,786 | <i>PLXNA2</i>        | 0.36296914  |
| 14,787 | <i>BACH2</i>         | 0.363694516 |
| 14,788 | <i>HSXIAPAF1</i>     | 0.364017079 |
| 14,789 | <i>UROS</i>          | 0.364101294 |
| 14,790 | <i>TM4SF5</i>        | 0.364102083 |
| 14,791 | <i>PECAM1</i>        | 0.364292542 |
| 14,792 | <i>DJ159A19.3</i>    | 0.365035086 |
| 14,793 | <i>FLJ44691</i>      | 0.365172523 |

|        |                    |             |
|--------|--------------------|-------------|
| 14,794 | <i>MGC61550</i>    | 0.36585     |
| 14,795 | <i>SRPR</i>        | 0.365931542 |
| 14,796 | <i>TLT4</i>        | 0.366415546 |
| 14,797 | <i>LOC728269</i>   | 0.366701973 |
| 14,798 | <i>TZFP</i>        | 0.366898134 |
| 14,799 | <i>CES1</i>        | 0.366965752 |
| 14,800 | <i>APOL4</i>       | 0.367001243 |
| 14,801 | <i>SH2B</i>        | 0.367576101 |
| 14,802 | <i>EVPL</i>        | 0.367583298 |
| 14,803 | <i>ARHGAP17</i>    | 0.367755863 |
| 14,804 | <i>PAFAH2</i>      | 0.367866991 |
| 14,805 | <i>SRR</i>         | 0.368177295 |
| 14,806 | <i>BRUNOL6</i>     | 0.368860629 |
| 14,807 | <i>ZNF69</i>       | 0.36894001  |
| 14,808 | <i>SPANXC</i>      | 0.369188591 |
| 14,809 | <i>CALD1</i>       | 0.369999285 |
| 14,810 | <i>USH1G</i>       | 0.370112976 |
| 14,811 | <i>GORASP2</i>     | 0.370154401 |
| 14,812 | <i>LOC729974</i>   | 0.370234471 |
| 14,813 | <i>B4GALNAC-T3</i> | 0.370610897 |
| 14,814 | <i>ZNF132</i>      | 0.371199153 |
| 14,815 | <i>PARK7</i>       | 0.371275458 |
| 14,816 | <i>ZDHH8</i>       | 0.37167428  |
| 14,817 | <i>C9ORF65</i>     | 0.371874144 |
| 14,818 | <i>COASY</i>       | 0.372581577 |
| 14,819 | <i>IL9R</i>        | 0.372780025 |
| 14,820 | <i>CDH24</i>       | 0.372794235 |
| 14,821 | <i>PAK1IP1</i>     | 0.373302672 |
| 14,822 | <i>GPR109A</i>     | 0.373433702 |
| 14,823 | <i>TNMD</i>        | 0.374269454 |
| 14,824 | <i>PRSS11</i>      | 0.374345534 |
| 14,825 | <i>RABL2B</i>      | 0.374801773 |
| 14,826 | <i>MT</i>          | 0.374834759 |
| 14,827 | <i>ABHD1</i>       | 0.375000941 |
| 14,828 | <i>FLJ11088</i>    | 0.375403824 |
| 14,829 | <i>UBE2NL</i>      | 0.375711119 |
| 14,830 | <i>GAPDH</i>       | 0.376052323 |
| 14,831 | <i>FLJ11506</i>    | 0.376316777 |
| 14,832 | <i>LZTFL1</i>      | 0.376423604 |
| 14,833 | <i>GNA14</i>       | 0.376577932 |
| 14,834 | <i>TRIP13</i>      | 0.376899023 |
| 14,835 | <i>GPR145</i>      | 0.377195794 |
| 14,836 | <i>MGC2776</i>     | 0.377263866 |
| 14,837 | <i>HIRIP5</i>      | 0.377341773 |
| 14,838 | <i>KIAA1345</i>    | 0.377407702 |
| 14,839 | <i>TLX1</i>        | 0.377842259 |
| 14,840 | <i>SPOCK3</i>      | 0.378409523 |

|        |                      |             |
|--------|----------------------|-------------|
| 14,841 | <i>IL27RA</i>        | 0.378449392 |
| 14,842 | <i>MX1</i>           | 0.378977609 |
| 14,843 | <i>GALM</i>          | 0.379122134 |
| 14,844 | <i>LHX6</i>          | 0.379177187 |
| 14,845 | <i>ASB13</i>         | 0.379253466 |
| 14,846 | <i>LOC388551</i>     | 0.379626254 |
| 14,847 | <i>FLJ30046</i>      | 0.379626254 |
| 14,848 | <i>CRB3</i>          | 0.379956514 |
| 14,849 | <i>CORO1C</i>        | 0.380358361 |
| 14,850 | <i>GNG5</i>          | 0.381033222 |
| 14,851 | <i>LOC643923</i>     | 0.381601932 |
| 14,852 | <i>TA-NFKBH</i>      | 0.38262531  |
| 14,853 | <i>OR10T2</i>        | 0.382856363 |
| 14,854 | <i>SEMA5A</i>        | 0.383091966 |
| 14,855 | <i>CD38</i>          | 0.383600804 |
| 14,856 | <i>SMARCAD1</i>      | 0.383653619 |
| 14,857 | <i>SNX6</i>          | 0.383735661 |
| 14,858 | <i>CKAP2</i>         | 0.384431986 |
| 14,859 | <i>LOC653483</i>     | 0.384676603 |
| 14,860 | <i>NCALD</i>         | 0.38614944  |
| 14,861 | <i>ZNF567</i>        | 0.386595622 |
| 14,862 | <i>CPA3</i>          | 0.386745393 |
| 14,863 | <i>EXOSC8</i>        | 0.386958228 |
| 14,864 | <i>AUH</i>           | 0.38699718  |
| 14,865 | <i>ASTL</i>          | 0.387152244 |
| 14,866 | <i>MLSTD1</i>        | 0.38716499  |
| 14,867 | <i>KRT6A</i>         | 0.387315991 |
| 14,868 | <i>ZNF650</i>        | 0.387419415 |
| 14,869 | <i>FLJ37562</i>      | 0.387568368 |
| 14,870 | <i>KIT</i>           | 0.387813365 |
| 14,871 | <i>LOC132321</i>     | 0.387962033 |
| 14,872 | <i>NEK3</i>          | 0.388665352 |
| 14,873 | <i>IGSF4B</i>        | 0.388804452 |
| 14,874 | <i>NOVA2</i>         | 0.389280079 |
| 14,875 | <i>SAMD6</i>         | 0.389700407 |
| 14,876 | <i>ATP10D</i>        | 0.389758379 |
| 14,877 | <i>CRB2</i>          | 0.38992829  |
| 14,878 | <i>DKFZP434G0625</i> | 0.390224933 |
| 14,879 | <i>FMO5</i>          | 0.390266171 |
| 14,880 | <i>GEM</i>           | 0.390433126 |
| 14,881 | <i>DRD4</i>          | 0.390507812 |
| 14,882 | <i>CARD12</i>        | 0.39059154  |
| 14,883 | <i>OAS1</i>          | 0.390723795 |
| 14,884 | <i>SMC1L2</i>        | 0.390811802 |
| 14,885 | <i>ADCK1</i>         | 0.390848708 |
| 14,886 | <i>BIK</i>           | 0.391305598 |
| 14,887 | <i>C20ORF67</i>      | 0.391515144 |

|        |                      |             |
|--------|----------------------|-------------|
| 14,888 | <i>TRUB1</i>         | 0.392063369 |
| 14,889 | <i>SNX10</i>         | 0.393473425 |
| 14,890 | <i>SNX19</i>         | 0.393755408 |
| 14,891 | <i>TTC7B</i>         | 0.394009326 |
| 14,892 | <i>PTGFRN</i>        | 0.394368217 |
| 14,893 | <i>FLJ90709</i>      | 0.394421025 |
| 14,894 | <i>BAI3</i>          | 0.394848688 |
| 14,895 | <i>SLC35D3</i>       | 0.394849291 |
| 14,896 | <i>GATA4</i>         | 0.395103316 |
| 14,897 | <i>GPR153</i>        | 0.395282776 |
| 14,898 | <i>DGKB</i>          | 0.395706262 |
| 14,899 | <i>FLJ25371</i>      | 0.395830697 |
| 14,900 | <i>C14ORF147</i>     | 0.395995092 |
| 14,901 | <i>EEF2K</i>         | 0.396100907 |
| 14,902 | <i>PLA2G4C</i>       | 0.396411286 |
| 14,903 | <i>DRD3</i>          | 0.396524835 |
| 14,904 | <i>PFKM</i>          | 0.397395229 |
| 14,905 | <i>RIC3</i>          | 0.397835188 |
| 14,906 | <i>PLK2</i>          | 0.397862903 |
| 14,907 | <i>WAC</i>           | 0.398300563 |
| 14,908 | <i>SLC2A4</i>        | 0.398337575 |
| 14,909 | <i>IDI2</i>          | 0.398473456 |
| 14,910 | <i>KCMF1</i>         | 0.399022049 |
| 14,911 | <i>UBE2T</i>         | 0.399213094 |
| 14,912 | <i>MUSTN1</i>        | 0.399381988 |
| 14,913 | <i>TSPO</i>          | 0.399403638 |
| 14,914 | <i>KCNG1</i>         | 0.399649425 |
| 14,915 | <i>ZNF553</i>        | 0.399805767 |
| 14,916 | <i>PRH2</i>          | 0.399847724 |
| 14,917 | <i>UNQ689</i>        | 0.400117785 |
| 14,918 | <i>OCSP</i>          | 0.400127955 |
| 14,919 | <i>LOC348801</i>     | 0.400131128 |
| 14,920 | <i>MEIS2</i>         | 0.40039699  |
| 14,921 | <i>C9ORF80</i>       | 0.40065725  |
| 14,922 | <i>VTI1B</i>         | 0.400717788 |
| 14,923 | <i>APOE</i>          | 0.400721332 |
| 14,924 | <i>SARS</i>          | 0.401355829 |
| 14,925 | <i>NFKBIA</i>        | 0.401378676 |
| 14,926 | <i>SYT11</i>         | 0.401509455 |
| 14,927 | <i>VAC14</i>         | 0.401536516 |
| 14,928 | <i>GABRP</i>         | 0.401775323 |
| 14,929 | <i>DKFZP564N2472</i> | 0.401995539 |
| 14,930 | <i>PPARA</i>         | 0.402403381 |
| 14,931 | <i>SCN4A</i>         | 0.402494034 |
| 14,932 | <i>KIAA0415</i>      | 0.402612661 |
| 14,933 | <i>FLJ14345</i>      | 0.402774899 |
| 14,934 | <i>MGC3207</i>       | 0.403091855 |

|        |                      |             |
|--------|----------------------|-------------|
| 14,935 | <i>ABCF2</i>         | 0.403471221 |
| 14,936 | <i>FLJ30656</i>      | 0.403484785 |
| 14,937 | <i>CDX4</i>          | 0.403691915 |
| 14,938 | <i>MVP</i>           | 0.403707775 |
| 14,939 | <i>LOC158724</i>     | 0.403769123 |
| 14,940 | <i>ZNF18</i>         | 0.404195501 |
| 14,941 | <i>C6ORF145</i>      | 0.404571385 |
| 14,942 | <i>TBPL1</i>         | 0.405061838 |
| 14,943 | <i>HTR7</i>          | 0.405279832 |
| 14,944 | <i>ID2</i>           | 0.405351143 |
| 14,945 | <i>CXCR4</i>         | 0.405440223 |
| 14,946 | <i>FLJ10241</i>      | 0.405449115 |
| 14,947 | <i>FLJ10241</i>      | 0.405449115 |
| 14,948 | <i>MGC13170</i>      | 0.405610486 |
| 14,949 | <i>MMP19</i>         | 0.40576953  |
| 14,950 | <i>PTOV1</i>         | 0.405838296 |
| 14,951 | <i>SEMA4A</i>        | 0.406326926 |
| 14,952 | <i>PPP1CC</i>        | 0.406672509 |
| 14,953 | <i>FLJ14904</i>      | 0.406790357 |
| 14,954 | <i>FLJ44894</i>      | 0.406875932 |
| 14,955 | <i>SERPINB7</i>      | 0.40699454  |
| 14,956 | <i>WNT2B</i>         | 0.408064597 |
| 14,957 | <i>HAGHL</i>         | 0.40809184  |
| 14,958 | <i>UGT1A7</i>        | 0.408580038 |
| 14,959 | <i>KRT76</i>         | 0.408844163 |
| 14,960 | <i>DKFZP547E1010</i> | 0.409318901 |
| 14,961 | <i>CDH17</i>         | 0.409567354 |
| 14,962 | <i>ZBP1</i>          | 0.409716132 |
| 14,963 | <i>LOC126017</i>     | 0.410437138 |
| 14,964 | <i>MRGPRF</i>        | 0.410620536 |
| 14,965 | <i>MRPL20</i>        | 0.410674687 |
| 14,966 | <i>SLC31A1</i>       | 0.410754638 |
| 14,967 | <i>ZNF25</i>         | 0.411381082 |
| 14,968 | <i>STARD10</i>       | 0.411464523 |
| 14,969 | <i>TLX3</i>          | 0.412234131 |
| 14,970 | <i>FECH</i>          | 0.412263002 |
| 14,971 | <i>GPR120</i>        | 0.412329386 |
| 14,972 | <i>PHACTR3</i>       | 0.412437704 |
| 14,973 | <i>ENPP1</i>         | 0.412700007 |
| 14,974 | <i>ITGA5</i>         | 0.412821856 |
| 14,975 | <i>ZFYVE27</i>       | 0.413342036 |
| 14,976 | <i>LOC644096</i>     | 0.413893034 |
| 14,977 | <i>TTC15</i>         | 0.41394146  |
| 14,978 | <i>TAS2R4</i>        | 0.413956941 |
| 14,979 | <i>MKLN1</i>         | 0.413963206 |
| 14,980 | <i>JAK1</i>          | 0.414189552 |
| 14,981 | <i>ZNF441</i>        | 0.414999867 |

|        |                  |             |
|--------|------------------|-------------|
| 14,982 | <i>SUCNR1</i>    | 0.415015422 |
| 14,983 | <i>NDN</i>       | 0.415133546 |
| 14,984 | <i>OSBPL11</i>   | 0.415157549 |
| 14,985 | <i>SIGLECL1</i>  | 0.415616183 |
| 14,986 | <i>SLC4A7</i>    | 0.41575442  |
| 14,987 | <i>ATP11A</i>    | 0.41575442  |
| 14,988 | <i>APM-1</i>     | 0.415771067 |
| 14,989 | <i>CSE-C</i>     | 0.416214016 |
| 14,990 | <i>ERMAP</i>     | 0.416448448 |
| 14,991 | <i>MEP50</i>     | 0.416931228 |
| 14,992 | <i>ORC6L</i>     | 0.417118308 |
| 14,993 | <i>OR2W5</i>     | 0.417164853 |
| 14,994 | <i>FLJ37396</i>  | 0.417737281 |
| 14,995 | <i>LOC390928</i> | 0.418771878 |
| 14,996 | <i>SYTL5</i>     | 0.418966638 |
| 14,997 | <i>TRIM74</i>    | 0.41929808  |
| 14,998 | <i>VPS45A</i>    | 0.419566071 |
| 14,999 | <i>JTB</i>       | 0.419737513 |
| 15,000 | <i>STARD3NL</i>  | 0.419823925 |
| 15,001 | <i>SGTB</i>      | 0.420428382 |
| 15,002 | <i>DDAH2</i>     | 0.420483601 |
| 15,003 | <i>RNF26</i>     | 0.421039757 |
| 15,004 | <i>KIAA0556</i>  | 0.422496291 |
| 15,005 | <i>APOB48R</i>   | 0.422655999 |
| 15,006 | <i>MFNG</i>      | 0.423141547 |
| 15,007 | <i>CCT8L2</i>    | 0.423699592 |
| 15,008 | <i>BMP5</i>      | 0.423753299 |
| 15,009 | <i>CCR5</i>      | 0.424020842 |
| 15,010 | <i>DULLARD</i>   | 0.424405125 |
| 15,011 | <i>NELL2</i>     | 0.424805536 |
| 15,012 | <i>NDUFB8</i>    | 0.425879314 |
| 15,013 | <i>ABCA3</i>     | 0.42615572  |
| 15,014 | <i>CNTNAP4</i>   | 0.42649592  |
| 15,015 | <i>MGC8685</i>   | 0.426524953 |
| 15,016 | <i>LOC392145</i> | 0.426720561 |
| 15,017 | <i>ARRDC4</i>    | 0.426722487 |
| 15,018 | <i>TAS2R8</i>    | 0.426920962 |
| 15,019 | <i>ARHGAP11A</i> | 0.427054646 |
| 15,020 | <i>ECGF1</i>     | 0.42718614  |
| 15,021 | <i>BHLHB2</i>    | 0.427583483 |
| 15,022 | <i>CACNA1G</i>   | 0.427628121 |
| 15,023 | <i>SH3TC1</i>    | 0.42954645  |
| 15,024 | <i>ICEBERG</i>   | 0.429664981 |
| 15,025 | <i>UGDH</i>      | 0.429733768 |
| 15,026 | <i>XDH</i>       | 0.429791615 |
| 15,027 | <i>SLC9A5</i>    | 0.430048779 |
| 15,028 | <i>KIAA0146</i>  | 0.431203381 |



|        |                    |             |
|--------|--------------------|-------------|
| 15,029 | <i>TBX5</i>        | 0.431277474 |
| 15,030 | <i>FLJ13386</i>    | 0.431580859 |
| 15,031 | <i>MRPL18</i>      | 0.431995441 |
| 15,032 | <i>GPAM</i>        | 0.432055549 |
| 15,033 | <i>AKR1CL2</i>     | 0.432418371 |
| 15,034 | <i>SLAMF1</i>      | 0.43314284  |
| 15,035 | <i>hCG_2036778</i> | 0.433293932 |
| 15,036 | <i>CHST11</i>      | 0.433549371 |
| 15,037 | <i>C1ORF51</i>     | 0.43358829  |
| 15,038 | <i>FLJ10458</i>    | 0.434213276 |
| 15,039 | <i>TMPRSS2</i>     | 0.434316145 |
| 15,040 | <i>DISP2</i>       | 0.434469784 |
| 15,041 | <i>LOC124245</i>   | 0.435789798 |
| 15,042 | <i>GPR68</i>       | 0.436087006 |
| 15,043 | <i>EBNA1BP2</i>    | 0.436167397 |
| 15,044 | <i>FAM8A1</i>      | 0.436549059 |
| 15,045 | <i>PFKFB4</i>      | 0.436584268 |
| 15,046 | <i>KLP1</i>        | 0.436788978 |
| 15,047 | <i>DLX5</i>        | 0.43682065  |
| 15,048 | <i>MTHFD1L</i>     | 0.437037783 |
| 15,049 | <i>PDE3A</i>       | 0.437587271 |
| 15,050 | <i>ZNF272</i>      | 0.43843643  |
| 15,051 | <i>C6ORF81</i>     | 0.438629953 |
| 15,052 | <i>SSA2</i>        | 0.438924794 |
| 15,053 | <i>BLVRB</i>       | 0.438933816 |
| 15,054 | <i>CD163L1</i>     | 0.439222156 |
| 15,055 | <i>DPP9</i>        | 0.439332821 |
| 15,056 | <i>LOC286097</i>   | 0.43942285  |
| 15,057 | <i>ASAH1</i>       | 0.439536316 |
| 15,058 | <i>GPD1</i>        | 0.439604571 |
| 15,059 | <i>GCDH</i>        | 0.439675625 |
| 15,060 | <i>PRPH</i>        | 0.440087802 |
| 15,061 | <i>ACTG2</i>       | 0.440672021 |
| 15,062 | <i>GRM1</i>        | 0.441296057 |
| 15,063 | <i>OLFM4</i>       | 0.44133929  |
| 15,064 | <i>IL1RN</i>       | 0.441827075 |
| 15,065 | <i>DND1</i>        | 0.441929281 |
| 15,066 | <i>LALBA</i>       | 0.442350884 |
| 15,067 | <i>APOA5</i>       | 0.442617073 |
| 15,068 | <i>IQSEC3</i>      | 0.4433903   |
| 15,069 | <i>OSM</i>         | 0.443832185 |
| 15,070 | <i>DNMT</i>        | 0.443957739 |
| 15,071 | <i>OR13C9</i>      | 0.443967572 |
| 15,072 | <i>ACCN3</i>       | 0.444382633 |
| 15,073 | <i>SLC9A4</i>      | 0.444401548 |
| 15,074 | <i>DDX25</i>       | 0.444722418 |
| 15,075 | <i>ARHGAP26</i>    | 0.44500927  |

|        |              |             |
|--------|--------------|-------------|
| 15,076 | RAG2         | 0.445079787 |
| 15,077 | RND1         | 0.445102892 |
| 15,078 | FLJ20519     | 0.445450924 |
| 15,079 | LOC139793    | 0.445519438 |
| 15,080 | FUK          | 0.445552852 |
| 15,081 | OR4D6        | 0.44666916  |
| 15,082 | AKR1A1       | 0.446764543 |
| 15,083 | CTH          | 0.447653209 |
| 15,084 | SLC5A11      | 0.447947138 |
| 15,085 | MAGEE2       | 0.448544156 |
| 15,086 | LOC100132832 | 0.448890332 |
| 15,087 | THSD3        | 0.449021628 |
| 15,088 | COIL         | 0.449620101 |
| 15,089 | PCDHA7       | 0.449729009 |
| 15,090 | LOC652859    | 0.450246499 |
| 15,091 | MYF6         | 0.450411464 |
| 15,092 | BMSC-UBP     | 0.450481643 |
| 15,093 | MSH6         | 0.450482598 |
| 15,094 | FLJ32745     | 0.450852865 |
| 15,095 | AQP5         | 0.450898378 |
| 15,096 | AD-017       | 0.450958395 |
| 15,097 | C20ORF139    | 0.450978106 |
| 15,098 | GRIN2B       | 0.451117598 |
| 15,099 | C21ORF58     | 0.451393478 |
| 15,100 | SPINK5       | 0.451963019 |
| 15,101 | MGC35261     | 0.452077449 |
| 15,102 | ZNF287       | 0.452481857 |
| 15,103 | DLL4         | 0.453000278 |
| 15,104 | TECTA        | 0.45344751  |
| 15,105 | NCBP2        | 0.45362119  |
| 15,106 | CXXC6        | 0.453730533 |
| 15,107 | RP11-257K9.7 | 0.454204414 |
| 15,108 | FLJ25323     | 0.454382151 |
| 15,109 | EDG8         | 0.454752771 |
| 15,110 | TLR5         | 0.455063185 |
| 15,111 | GAN          | 0.455358761 |
| 15,112 | SERPINB12    | 0.4554873   |
| 15,113 | HADHSC       | 0.455642588 |
| 15,114 | OBRGRP       | 0.455743194 |
| 15,115 | C9ORF61      | 0.455867547 |
| 15,116 | SUCLG1       | 0.456017045 |
| 15,117 | KCND3        | 0.456052839 |
| 15,118 | LOC135935    | 0.456053484 |
| 15,119 | UCP3         | 0.456128456 |
| 15,120 | TRIM35       | 0.456159194 |
| 15,121 | CDA08        | 0.456176471 |
| 15,122 | OR10H2       | 0.456352842 |

|        |                      |             |
|--------|----------------------|-------------|
| 15,123 | <i>FLJ31139</i>      | 0.456818238 |
| 15,124 | <i>DKFZP762E1312</i> | 0.457116932 |
| 15,125 | <i>LOC65243</i>      | 0.457199328 |
| 15,126 | <i>MAP2K2</i>        | 0.45727324  |
| 15,127 | <i>TSPY2</i>         | 0.457331416 |
| 15,128 | <i>C16orf50</i>      | 0.457445484 |
| 15,129 | <i>SFXN1</i>         | 0.457752362 |
| 15,130 | <i>OR1L6</i>         | 0.457758603 |
| 15,131 | <i>CIDEA</i>         | 0.457971006 |
| 15,132 | <i>IL18R1</i>        | 0.458111708 |
| 15,133 | <i>LBH</i>           | 0.458172266 |
| 15,134 | <i>CARKL</i>         | 0.458269613 |
| 15,135 | <i>MAPK13</i>        | 0.459241667 |
| 15,136 | <i>CALU</i>          | 0.459425594 |
| 15,137 | <i>MGC11324</i>      | 0.459583819 |
| 15,138 | <i>FLJ33360</i>      | 0.459840828 |
| 15,139 | <i>PADI4</i>         | 0.460308575 |
| 15,140 | <i>CHR3SYT</i>       | 0.460401992 |
| 15,141 | <i>KLHL11</i>        | 0.460848461 |
| 15,142 | <i>LOC150297</i>     | 0.461269276 |
| 15,143 | <i>MTA1</i>          | 0.461488094 |
| 15,144 | <i>CD2BP2</i>        | 0.461670124 |
| 15,145 | <i>OR11H12</i>       | 0.461834685 |
| 15,146 | <i>FKBP8</i>         | 0.462031762 |
| 15,147 | <i>SCO1</i>          | 0.46222773  |
| 15,148 | <i>MAGEB4</i>        | 0.462315111 |
| 15,149 | <i>FOXP3</i>         | 0.462433543 |
| 15,150 | <i>CAPNS1</i>        | 0.462555778 |
| 15,151 | <i>UFM1</i>          | 0.462796387 |
| 15,152 | <i>PDE7B</i>         | 0.463364487 |
| 15,153 | <i>KIAA0674</i>      | 0.463408931 |
| 15,154 | <i>APPL</i>          | 0.463481066 |
| 15,155 | <i>KRTHA4</i>        | 0.463644382 |
| 15,156 | <i>CD3E</i>          | 0.463746193 |
| 15,157 | <i>C20orf134</i>     | 0.463884673 |
| 15,158 | <i>GPR6</i>          | 0.464881481 |
| 15,159 | <i>LOC130940</i>     | 0.464963    |
| 15,160 | <i>ARPP-21</i>       | 0.465035314 |
| 15,161 | <i>DSC1</i>          | 0.465306384 |
| 15,162 | <i>FLJ10276</i>      | 0.465566139 |
| 15,163 | <i>FOXM1</i>         | 0.465918324 |
| 15,164 | <i>FCGR1C</i>        | 0.466054408 |
| 15,165 | <i>MPN2</i>          | 0.466261783 |
| 15,166 | <i>TBDN100</i>       | 0.46652965  |
| 15,167 | <i>UBASH3A</i>       | 0.466554812 |
| 15,168 | <i>PLCL2</i>         | 0.466654452 |
| 15,169 | <i>FLJ25143</i>      | 0.466868643 |

|        |                  |             |
|--------|------------------|-------------|
| 15,170 | <i>GABRB2</i>    | 0.466889839 |
| 15,171 | <i>MRPS17</i>    | 0.467094635 |
| 15,172 | <i>NEK2</i>      | 0.467348329 |
| 15,173 | <i>PLEKHG3</i>   | 0.467650652 |
| 15,174 | <i>LOC221143</i> | 0.467660154 |
| 15,175 | <i>VPS4A</i>     | 0.46824495  |
| 15,176 | <i>SLC16A10</i>  | 0.468810599 |
| 15,177 | <i>HOXB7</i>     | 0.469096242 |
| 15,178 | <i>KIAA1679</i>  | 0.469319944 |
| 15,179 | <i>DDB2</i>      | 0.469429075 |
| 15,180 | <i>PAICS</i>     | 0.470532051 |
| 15,181 | <i>CHES1</i>     | 0.470645052 |
| 15,182 | <i>SOX30</i>     | 0.47069983  |
| 15,183 | <i>MORG1</i>     | 0.470973472 |
| 15,184 | <i>OR2M7</i>     | 0.471072394 |
| 15,185 | <i>OR3A3</i>     | 0.471439535 |
| 15,186 | <i>OTUD6B</i>    | 0.471791187 |
| 15,187 | <i>MPP7</i>      | 0.472063448 |
| 15,188 | <i>TM9SF1</i>    | 0.472091132 |
| 15,189 | <i>SLC26A8</i>   | 0.472448387 |
| 15,190 | <i>JM1</i>       | 0.472664275 |
| 15,191 | <i>PSCA</i>      | 0.473554976 |
| 15,192 | <i>EML1</i>      | 0.473626513 |
| 15,193 | <i>WFDC2</i>     | 0.473758918 |
| 15,194 | <i>PXMP3</i>     | 0.473849579 |
| 15,195 | <i>HDGF</i>      | 0.473867594 |
| 15,196 | <i>CYP2A13</i>   | 0.474120867 |
| 15,197 | <i>ACO2</i>      | 0.4743463   |
| 15,198 | <i>OR8J1</i>     | 0.474358823 |
| 15,199 | <i>BMP8B</i>     | 0.474647991 |
| 15,200 | <i>FLJ38608</i>  | 0.474899171 |
| 15,201 | <i>DES</i>       | 0.475144542 |
| 15,202 | <i>LOC89944</i>  | 0.475192513 |
| 15,203 | <i>SRM</i>       | 0.475795291 |
| 15,204 | <i>LOC340075</i> | 0.47596749  |
| 15,205 | <i>MSH2</i>      | 0.476168842 |
| 15,206 | <i>TRIM46</i>    | 0.476272308 |
| 15,207 | <i>LAMB1</i>     | 0.47681029  |
| 15,208 | <i>SMPX</i>      | 0.476929021 |
| 15,209 | <i>FLJ20719</i>  | 0.476955882 |
| 15,210 | <i>IL12A</i>     | 0.477503472 |
| 15,211 | <i>MCCC2</i>     | 0.47781172  |
| 15,212 | <i>RNF25</i>     | 0.478602741 |
| 15,213 | <i>WIF1</i>      | 0.478850105 |
| 15,214 | <i>FLJ11078</i>  | 0.479118552 |
| 15,215 | <i>SLC6A17</i>   | 0.479829857 |
| 15,216 | <i>FLJ43860</i>  | 0.480034865 |

|        |                  |             |
|--------|------------------|-------------|
| 15,217 | <i>UGT1A3</i>    | 0.480062634 |
| 15,218 | <i>HOOK3</i>     | 0.480248685 |
| 15,219 | <i>HOXC10</i>    | 0.480772084 |
| 15,220 | <i>CYP4F8</i>    | 0.480786047 |
| 15,221 | <i>TMEM50A</i>   | 0.480842337 |
| 15,222 | <i>XRCC3</i>     | 0.481017192 |
| 15,223 | <i>CD300LG</i>   | 0.481054387 |
| 15,224 | <i>CYLC1</i>     | 0.48121917  |
| 15,225 | <i>ATF6</i>      | 0.481489699 |
| 15,226 | <i>NXPH3</i>     | 0.481539502 |
| 15,227 | <i>RAB19B</i>    | 0.481708152 |
| 15,228 | <i>ZNF496</i>    | 0.482397555 |
| 15,229 | <i>MTNR1A</i>    | 0.482404899 |
| 15,230 | <i>USP54</i>     | 0.482670707 |
| 15,231 | <i>GL004</i>     | 0.482834051 |
| 15,232 | <i>KSR2</i>      | 0.482976795 |
| 15,233 | <i>TYRP1</i>     | 0.483009503 |
| 15,234 | <i>SCN8A</i>     | 0.484266315 |
| 15,235 | <i>CLDN4</i>     | 0.484403928 |
| 15,236 | <i>TCP10</i>     | 0.48449549  |
| 15,237 | <i>NR4A1</i>     | 0.484538901 |
| 15,238 | <i>FLJ10511</i>  | 0.485025934 |
| 15,239 | <i>OR10H3</i>    | 0.485714484 |
| 15,240 | <i>BAP1</i>      | 0.48571831  |
| 15,241 | <i>INSM2</i>     | 0.486461412 |
| 15,242 | <i>HCFC1R1</i>   | 0.486485934 |
| 15,243 | <i>UTX</i>       | 0.486499305 |
| 15,244 | <i>TAF7L</i>     | 0.486852099 |
| 15,245 | <i>BAI2</i>      | 0.486894451 |
| 15,246 | <i>LOC57149</i>  | 0.48726836  |
| 15,247 | <i>ZNF566</i>    | 0.48775103  |
| 15,248 | <i>KIAA1229</i>  | 0.487751188 |
| 15,249 | <i>BTBD8</i>     | 0.487820795 |
| 15,250 | <i>MGC10540</i>  | 0.488256781 |
| 15,251 | <i>PARP6</i>     | 0.488310792 |
| 15,252 | <i>KNG1</i>      | 0.488859527 |
| 15,253 | <i>PLD1</i>      | 0.488883812 |
| 15,254 | <i>SERPINH1</i>  | 0.488935684 |
| 15,255 | <i>PPP1R9A</i>   | 0.49004821  |
| 15,256 | <i>TMEM21A</i>   | 0.490413214 |
| 15,257 | <i>TPBG</i>      | 0.490595129 |
| 15,258 | <i>TDRD7</i>     | 0.491086068 |
| 15,259 | <i>LOC343637</i> | 0.491366121 |
| 15,260 | <i>CYB561D2</i>  | 0.491464705 |
| 15,261 | <i>GUCA1C</i>    | 0.491500783 |
| 15,262 | <i>RAB3C</i>     | 0.491980225 |
| 15,263 | <i>LRRN5</i>     | 0.492046983 |

|        |                     |             |
|--------|---------------------|-------------|
| 15,264 | <i>OR51T1</i>       | 0.492156274 |
| 15,265 | <i>CKM</i>          | 0.49220208  |
| 15,266 | <i>ZNF623</i>       | 0.492400144 |
| 15,267 | <i>TNC</i>          | 0.493070684 |
| 15,268 | <i>MAGEA10</i>      | 0.493161515 |
| 15,269 | <i>ADH7</i>         | 0.49339253  |
| 15,270 | <i>FLJ25444</i>     | 0.493765741 |
| 15,271 | <i>CCKBR</i>        | 0.493965609 |
| 15,272 | <i>PGLYRP3</i>      | 0.493980019 |
| 15,273 | <i>HDAC1</i>        | 0.494303869 |
| 15,274 | <i>KLHL4</i>        | 0.494432071 |
| 15,275 | <i>FGD5</i>         | 0.494768017 |
| 15,276 | <i>YIPF1</i>        | 0.494833038 |
| 15,277 | <i>CHRNA7</i>       | 0.495022252 |
| 15,278 | <i>LOC85865</i>     | 0.495312526 |
| 15,279 | <i>ELOVL2</i>       | 0.49547266  |
| 15,280 | <i>PRB1</i>         | 0.49554884  |
| 15,281 | <i>SART2</i>        | 0.495995089 |
| 15,282 | <i>CST5</i>         | 0.496145959 |
| 15,283 | <i>CMYA5</i>        | 0.49638898  |
| 15,284 | <i>HBG1</i>         | 0.49668367  |
| 15,285 | <i>NFE2</i>         | 0.496791387 |
| 15,286 | <i>IL1F7</i>        | 0.497027479 |
| 15,287 | <i>IMPG2</i>        | 0.497166672 |
| 15,288 | <i>MGEA6</i>        | 0.497187366 |
| 15,289 | <i>RICTOR</i>       | 0.497444626 |
| 15,290 | <i>DCN</i>          | 0.497892904 |
| 15,291 | <i>PRDM11</i>       | 0.498177128 |
| 15,292 | <i>LEF1</i>         | 0.49851029  |
| 15,293 | <i>FUT3</i>         | 0.498798981 |
| 15,294 | <i>MGC48986</i>     | 0.499328969 |
| 15,295 | <i>FTSJ3</i>        | 0.499645458 |
| 15,296 | <i>NROB1</i>        | 0.499679006 |
| 15,297 | <i>NBEA</i>         | 0.499779733 |
| 15,298 | <i>EML4</i>         | 0.500803139 |
| 15,299 | <i>THRSP</i>        | 0.501239314 |
| 15,300 | <i>HLA-F</i>        | 0.50138515  |
| 15,301 | <i>FLJ45079</i>     | 0.502246652 |
| 15,302 | <i>PDCL2</i>        | 0.502394401 |
| 15,303 | <i>LAF4</i>         | 0.502964639 |
| 15,304 | <i>IFI27</i>        | 0.503350517 |
| 15,305 | <i>UCN2</i>         | 0.50358641  |
| 15,306 | <i>SOM</i>          | 0.503630669 |
| 15,307 | <i>DKFZP762O076</i> | 0.504045609 |
| 15,308 | <i>HMOX2</i>        | 0.504778754 |
| 15,309 | <i>JARID2</i>       | 0.504890925 |
| 15,310 | <i>C10ORF68</i>     | 0.505058974 |

|        |                 |             |
|--------|-----------------|-------------|
| 15,311 | <i>SDF2</i>     | 0.50515999  |
| 15,312 | <i>OR1L3</i>    | 0.505221288 |
| 15,313 | <i>NICN1</i>    | 0.505347465 |
| 15,314 | <i>URG4</i>     | 0.505970059 |
| 15,315 | <i>ANGPT4</i>   | 0.506435277 |
| 15,316 | <i>TNFSF8</i>   | 0.506529893 |
| 15,317 | <i>OSTF1</i>    | 0.506541715 |
| 15,318 | <i>TPT1</i>     | 0.506564706 |
| 15,319 | <i>CDC2L2</i>   | 0.506688451 |
| 15,320 | <i>MYOG</i>     | 0.506809576 |
| 15,321 | <i>PSME2</i>    | 0.507239967 |
| 15,322 | <i>FLJ12529</i> | 0.507470535 |
| 15,323 | <i>PNLIPRP2</i> | 0.507511346 |
| 15,324 | <i>GPR101</i>   | 0.508233688 |
| 15,325 | <i>FGD4</i>     | 0.508392632 |
| 15,326 | <i>PPM1F</i>    | 0.510242799 |
| 15,327 | <i>ANGPTL1</i>  | 0.510292762 |
| 15,328 | <i>DEFB111</i>  | 0.510903062 |
| 15,329 | <i>ZNF236</i>   | 0.510985709 |
| 15,330 | <i>IMP4</i>     | 0.511163079 |
| 15,331 | <i>C1QG</i>     | 0.511427992 |
| 15,332 | <i>SLC13A4</i>  | 0.512400247 |
| 15,333 | <i>CCNG1</i>    | 0.512571901 |
| 15,334 | <i>SAA2</i>     | 0.512794556 |
| 15,335 | <i>OR1A2</i>    | 0.514649192 |
| 15,336 | <i>UNQ501</i>   | 0.515288346 |
| 15,337 | <i>UPK3A</i>    | 0.51550366  |
| 15,338 | <i>KRTCAP3</i>  | 0.515736119 |
| 15,339 | <i>MARVELD2</i> | 0.515924127 |
| 15,340 | <i>BCL11A</i>   | 0.515966429 |
| 15,341 | <i>ULBP2</i>    | 0.51648693  |
| 15,342 | <i>SF4</i>      | 0.51665424  |
| 15,343 | <i>FAM35A</i>   | 0.516655161 |
| 15,344 | <i>ZZZ3</i>     | 0.516758651 |
| 15,345 | <i>EIF4A2</i>   | 0.516780484 |
| 15,346 | <i>LIP8</i>     | 0.516869856 |
| 15,347 | <i>TPTE</i>     | 0.517311107 |
| 15,348 | <i>IL21R</i>    | 0.518343993 |
| 15,349 | <i>DLL3</i>     | 0.518496109 |
| 15,350 | <i>CENTB2</i>   | 0.518615866 |
| 15,351 | <i>RFP</i>      | 0.518719275 |
| 15,352 | <i>PPP1R12A</i> | 0.518838764 |
| 15,353 | <i>FLJ32499</i> | 0.519217399 |
| 15,354 | <i>C1GALT1</i>  | 0.519318725 |
| 15,355 | <i>FLJ10846</i> | 0.519400103 |
| 15,356 | <i>MYL6</i>     | 0.519548911 |
| 15,357 | <i>CNOT6L</i>   | 0.519847286 |

|        |                  |             |
|--------|------------------|-------------|
| 15,358 | <i>KRTHB1</i>    | 0.520738828 |
| 15,359 | <i>NMB</i>       | 0.52085931  |
| 15,360 | <i>SEMA4D</i>    | 0.520871344 |
| 15,361 | <i>FLJ20045</i>  | 0.52098827  |
| 15,362 | <i>SLC6A4</i>    | 0.521148252 |
| 15,363 | <i>RAB6B</i>     | 0.521244187 |
| 15,364 | <i>C1ORF29</i>   | 0.521379263 |
| 15,365 | <i>KRTAP17-1</i> | 0.521426985 |
| 15,366 | <i>ZBTB33</i>    | 0.521761596 |
| 15,367 | <i>DESC1</i>     | 0.522591669 |
| 15,368 | <i>MGC17337</i>  | 0.522725415 |
| 15,369 | <i>RASGRF2</i>   | 0.524110289 |
| 15,370 | <i>RRBP1</i>     | 0.524298288 |
| 15,371 | <i>C6ORF93</i>   | 0.524442955 |
| 15,372 | <i>HBM</i>       | 0.524694061 |
| 15,373 | <i>AHSA1</i>     | 0.524797001 |
| 15,374 | <i>C14ORF133</i> | 0.525121246 |
| 15,375 | <i>FLJ32440</i>  | 0.525327455 |
| 15,376 | <i>CLDN17</i>    | 0.525446412 |
| 15,377 | <i>COL4A2</i>    | 0.52551464  |
| 15,378 | <i>C20ORF75</i>  | 0.525960636 |
| 15,379 | <i>DRD1</i>      | 0.526001138 |
| 15,380 | <i>KIDINS220</i> | 0.526051983 |
| 15,381 | <i>HEM1</i>      | 0.526309883 |
| 15,382 | <i>TNIP3</i>     | 0.526696656 |
| 15,383 | <i>ZNF397</i>    | 0.52672156  |
| 15,384 | <i>C1ORF2</i>    | 0.527119153 |
| 15,385 | <i>NCOA6IP</i>   | 0.527125612 |
| 15,386 | <i>CAP1</i>      | 0.527354935 |
| 15,387 | <i>ARVCF</i>     | 0.527803692 |
| 15,388 | <i>BST2</i>      | 0.527833757 |
| 15,389 | <i>CRIP1</i>     | 0.527869691 |
| 15,390 | <i>MAN1A1</i>    | 0.5278803   |
| 15,391 | <i>ZNF17</i>     | 0.528083778 |
| 15,392 | <i>P30</i>       | 0.528607312 |
| 15,393 | <i>CAPN11</i>    | 0.52861441  |
| 15,394 | <i>DEFB125</i>   | 0.528809139 |
| 15,395 | <i>NRXN1</i>     | 0.529418794 |
| 15,396 | <i>MGC2650</i>   | 0.529800655 |
| 15,397 | <i>C20ORF149</i> | 0.53009799  |
| 15,398 | <i>TNFRSF11A</i> | 0.530264282 |
| 15,399 | <i>NRIP2</i>     | 0.530724404 |
| 15,400 | <i>COL9A1</i>    | 0.530815559 |
| 15,401 | <i>TNRC9</i>     | 0.530888946 |
| 15,402 | <i>PTHR1</i>     | 0.53126877  |
| 15,403 | <i>FLJ22175</i>  | 0.531315772 |
| 15,404 | <i>TBC1D5</i>    | 0.531483673 |



|        |                  |             |
|--------|------------------|-------------|
| 15,405 | <i>EIF2C2</i>    | 0.531768674 |
| 15,406 | <i>RAB20</i>     | 0.531904737 |
| 15,407 | <i>ZNF364</i>    | 0.5324077   |
| 15,408 | <i>TSSC1</i>     | 0.532630714 |
| 15,409 | <i>IL4R</i>      | 0.533147032 |
| 15,410 | <i>C10ORF61</i>  | 0.533716256 |
| 15,411 | <i>TCEB3B</i>    | 0.533971792 |
| 15,412 | <i>RPA2</i>      | 0.534042651 |
| 15,413 | <i>CDT6</i>      | 0.53431331  |
| 15,414 | <i>PDLIM7</i>    | 0.534842865 |
| 15,415 | <i>POM121L2</i>  | 0.535826075 |
| 15,416 | <i>CBX3</i>      | 0.53610361  |
| 15,417 | <i>TAF1B</i>     | 0.536196172 |
| 15,418 | <i>15E1.2</i>    | 0.536388226 |
| 15,419 | <i>SYT6</i>      | 0.536608414 |
| 15,420 | <i>ALPL</i>      | 0.536699459 |
| 15,421 | <i>FLJ36754</i>  | 0.537137453 |
| 15,422 | <i>RNF113B</i>   | 0.537288372 |
| 15,423 | <i>HAVCR1</i>    | 0.537693299 |
| 15,424 | <i>SLAMF6</i>    | 0.53806486  |
| 15,425 | <i>LRDD</i>      | 0.538117262 |
| 15,426 | <i>ACTN1</i>     | 0.538214957 |
| 15,427 | <i>KIAA1704</i>  | 0.538531913 |
| 15,428 | <i>LOC643834</i> | 0.538975957 |
| 15,429 | <i>LOC643905</i> | 0.53952225  |
| 15,430 | <i>PPP1R1C</i>   | 0.540328678 |
| 15,431 | <i>RIMS3</i>     | 0.540564799 |
| 15,432 | <i>C11ORF24</i>  | 0.541308363 |
| 15,433 | <i>MPI</i>       | 0.541430923 |
| 15,434 | <i>ACRC</i>      | 0.541541395 |
| 15,435 | <i>MGC11061</i>  | 0.541796236 |
| 15,436 | <i>DLX4</i>      | 0.542219723 |
| 15,437 | <i>LOC90313</i>  | 0.542653701 |
| 15,438 | <i>ADH1B</i>     | 0.542784529 |
| 15,439 | <i>SLC25A36</i>  | 0.542833251 |
| 15,440 | <i>DEFB112</i>   | 0.543009331 |
| 15,441 | <i>SSTR1</i>     | 0.543223495 |
| 15,442 | <i>MGC10731</i>  | 0.543788595 |
| 15,443 | <i>PSCDBP</i>    | 0.543879799 |
| 15,444 | <i>COPE</i>      | 0.546445964 |
| 15,445 | <i>LIMS1</i>     | 0.546911479 |
| 15,446 | <i>TIMM9</i>     | 0.546966632 |
| 15,447 | <i>MSH4</i>      | 0.547116064 |
| 15,448 | <i>MYLC2PL</i>   | 0.547412533 |
| 15,449 | <i>HT001</i>     | 0.5477508   |
| 15,450 | <i>AGXT</i>      | 0.54792441  |
| 15,451 | <i>KIAA1542</i>  | 0.548907352 |

|        |                  |             |
|--------|------------------|-------------|
| 15,452 | <i>IFT140</i>    | 0.549145837 |
| 15,453 | <i>IFT140</i>    | 0.549145837 |
| 15,454 | <i>SPATA9</i>    | 0.549196558 |
| 15,455 | <i>HHLA2</i>     | 0.549283541 |
| 15,456 | <i>ALDH3B2</i>   | 0.549520504 |
| 15,457 | <i>KBTBD7</i>    | 0.551051684 |
| 15,458 | <i>VPS33B</i>    | 0.551293757 |
| 15,459 | <i>PPEF2</i>     | 0.551398898 |
| 15,460 | <i>DXS1283E</i>  | 0.551693019 |
| 15,461 | <i>SULF2</i>     | 0.552577403 |
| 15,462 | <i>ULK4</i>      | 0.552616511 |
| 15,463 | <i>MOBP</i>      | 0.553202134 |
| 15,464 | <i>C1orf164</i>  | 0.553203588 |
| 15,465 | <i>OR5BF1</i>    | 0.553288584 |
| 15,466 | <i>FLJ14431</i>  | 0.553650929 |
| 15,467 | <i>ARHGAP10</i>  | 0.553712038 |
| 15,468 | <i>GPR152</i>    | 0.554964516 |
| 15,469 | <i>CCR6</i>      | 0.554964516 |
| 15,470 | <i>POLR2K</i>    | 0.555026858 |
| 15,471 | <i>SPPL2B</i>    | 0.555058206 |
| 15,472 | <i>ATP2C1</i>    | 0.555314687 |
| 15,473 | <i>C20ORF100</i> | 0.555588169 |
| 15,474 | <i>C14ORF168</i> | 0.555889237 |
| 15,475 | <i>DDX49</i>     | 0.556132033 |
| 15,476 | <i>TMCC3</i>     | 0.556586736 |
| 15,477 | <i>KLF15</i>     | 0.557055951 |
| 15,478 | <i>MGEA5</i>     | 0.557320517 |
| 15,479 | <i>C14ORF28</i>  | 0.557563463 |
| 15,480 | <i>BCS1L</i>     | 0.55760771  |
| 15,481 | <i>TFPI2</i>     | 0.558495159 |
| 15,482 | <i>WBSCR20A</i>  | 0.558557025 |
| 15,483 | <i>P2RY12</i>    | 0.558622802 |
| 15,484 | <i>KIAA0523</i>  | 0.558959283 |
| 15,485 | <i>TPH1</i>      | 0.559382371 |
| 15,486 | <i>NDUFS4</i>    | 0.559732955 |
| 15,487 | <i>ATRN</i>      | 0.560286038 |
| 15,488 | <i>ARIH1</i>     | 0.560766657 |
| 15,489 | <i>GYS1</i>      | 0.560873844 |
| 15,490 | <i>LOC139067</i> | 0.562180583 |
| 15,491 | <i>PRICKLE2</i>  | 0.56255422  |
| 15,492 | <i>TBC1D4</i>    | 0.562889135 |
| 15,493 | <i>FLJ31579</i>  | 0.562988101 |
| 15,494 | <i>DYRK4</i>     | 0.563627653 |
| 15,495 | <i>LMNB1</i>     | 0.563754176 |
| 15,496 | <i>AOF2</i>      | 0.563900763 |
| 15,497 | <i>PRF1</i>      | 0.564077125 |
| 15,498 | <i>CMIP</i>      | 0.564468196 |

|        |                  |             |
|--------|------------------|-------------|
| 15,499 | <i>GSPT2</i>     | 0.56454382  |
| 15,500 | <i>ZMYND10</i>   | 0.56533697  |
| 15,501 | <i>DXS9879E</i>  | 0.566065584 |
| 15,502 | <i>ALDH3A2</i>   | 0.566556973 |
| 15,503 | <i>ZFAND6</i>    | 0.566704432 |
| 15,504 | <i>SERPINA10</i> | 0.566911934 |
| 15,505 | <i>FLJ13614</i>  | 0.567723908 |
| 15,506 | <i>LCP1</i>      | 0.56820045  |
| 15,507 | <i>PPIE</i>      | 0.568521019 |
| 15,508 | <i>IMMP2L</i>    | 0.569100616 |
| 15,509 | <i>SELP</i>      | 0.569139912 |
| 15,510 | <i>FLJ34306</i>  | 0.569420937 |
| 15,511 | <i>AP3B1</i>     | 0.569993588 |
| 15,512 | <i>DKK2</i>      | 0.570293547 |
| 15,513 | <i>FLJ38159</i>  | 0.571208072 |
| 15,514 | <i>DNAI1</i>     | 0.571473251 |
| 15,515 | <i>TCL6</i>      | 0.571805975 |
| 15,516 | <i>TPMT</i>      | 0.572331214 |
| 15,517 | <i>LOC130617</i> | 0.572476576 |
| 15,518 | <i>ERCC5</i>     | 0.57248445  |
| 15,519 | <i>P8</i>        | 0.572556098 |
| 15,520 | <i>TCBA1</i>     | 0.573420225 |
| 15,521 | <i>MXD3</i>      | 0.573590244 |
| 15,522 | <i>PLXNA3</i>    | 0.57372874  |
| 15,523 | <i>WIRE</i>      | 0.574076592 |
| 15,524 | <i>CDH3</i>      | 0.575924759 |
| 15,525 | <i>C14ORF148</i> | 0.576421142 |
| 15,526 | <i>KAZALD1</i>   | 0.576562731 |
| 15,527 | <i>RUNX2</i>     | 0.576919202 |
| 15,528 | <i>NPEPPS</i>    | 0.57697825  |
| 15,529 | <i>HSGT1</i>     | 0.577332771 |
| 15,530 | <i>GANC</i>      | 0.577833497 |
| 15,531 | <i>ANKRD5</i>    | 0.57842476  |
| 15,532 | <i>LOC390637</i> | 0.578662004 |
| 15,533 | <i>OR6C1</i>     | 0.5788907   |
| 15,534 | <i>NPAS1</i>     | 0.579008067 |
| 15,535 | <i>ADRB3</i>     | 0.579072116 |
| 15,536 | <i>ATP2A3</i>    | 0.579227912 |
| 15,537 | <i>D4S234E</i>   | 0.579315881 |
| 15,538 | <i>MAN2A1</i>    | 0.580676554 |
| 15,539 | <i>SPHAR</i>     | 0.581141308 |
| 15,540 | <i>CAS1</i>      | 0.581730411 |
| 15,541 | <i>PEX1</i>      | 0.581793552 |
| 15,542 | <i>GCK</i>       | 0.581798018 |
| 15,543 | <i>NAT1</i>      | 0.582704758 |
| 15,544 | <i>STARD8</i>    | 0.583227081 |
| 15,545 | <i>MLL4</i>      | 0.583267301 |

|        |                  |             |
|--------|------------------|-------------|
| 15,546 | <i>UBAP2</i>     | 0.583311732 |
| 15,547 | <i>MGC13017</i>  | 0.583503358 |
| 15,548 | <i>ARHGAP5</i>   | 0.58356911  |
| 15,549 | <i>GSH-2</i>     | 0.583803006 |
| 15,550 | <i>FHR-4</i>     | 0.584106382 |
| 15,551 | <i>TRALPUSH</i>  | 0.584373173 |
| 15,552 | <i>RBM6</i>      | 0.584766305 |
| 15,553 | <i>SMARCA2</i>   | 0.585464415 |
| 15,554 | <i>LONRF3</i>    | 0.585551719 |
| 15,555 | <i>ZNF581</i>    | 0.585658954 |
| 15,556 | <i>FLJ22833</i>  | 0.586233822 |
| 15,557 | <i>SOX14</i>     | 0.586560392 |
| 15,558 | <i>M6PR</i>      | 0.586755561 |
| 15,559 | <i>SLC17A3</i>   | 0.586781506 |
| 15,560 | <i>ANXA6</i>     | 0.586973234 |
| 15,561 | <i>LOC196264</i> | 0.5869976   |
| 15,562 | <i>USP11</i>     | 0.587615384 |
| 15,563 | <i>PCDHB8</i>    | 0.588498792 |
| 15,564 | <i>TIA1</i>      | 0.588569971 |
| 15,565 | <i>LOC389677</i> | 0.588787115 |
| 15,566 | <i>LOC51057</i>  | 0.588805732 |
| 15,567 | <i>C8ORF20</i>   | 0.591278042 |
| 15,568 | <i>MRPS12</i>    | 0.592006746 |
| 15,569 | <i>LOC653319</i> | 0.592729771 |
| 15,570 | <i>CHRNA6</i>    | 0.593083679 |
| 15,571 | <i>C6ORF33</i>   | 0.593354392 |
| 15,572 | <i>FLJ20403</i>  | 0.593827637 |
| 15,573 | <i>MYO7A</i>     | 0.593884946 |
| 15,574 | <i>OR5AY1</i>    | 0.594019491 |
| 15,575 | <i>PPP1R1A</i>   | 0.594127565 |
| 15,576 | <i>ZNF507</i>    | 0.595021417 |
| 15,577 | <i>TADA2L</i>    | 0.595254034 |
| 15,578 | <i>MRPL21</i>    | 0.59529073  |
| 15,579 | <i>DCPS</i>      | 0.595674629 |
| 15,580 | <i>FLJ14502</i>  | 0.595832846 |
| 15,581 | <i>VENTX2</i>    | 0.596174849 |
| 15,582 | <i>C1QL1</i>     | 0.596623579 |
| 15,583 | <i>C9ORF21</i>   | 0.59679438  |
| 15,584 | <i>HIST1H4E</i>  | 0.59720418  |
| 15,585 | <i>WDR44</i>     | 0.597204772 |
| 15,586 | <i>MGC50721</i>  | 0.597543379 |
| 15,587 | <i>TIGD7</i>     | 0.597659644 |
| 15,588 | <i>LOC283129</i> | 0.597912749 |
| 15,589 | <i>MYCN</i>      | 0.597999843 |
| 15,590 | <i>BASP1</i>     | 0.598639586 |
| 15,591 | <i>CGI-12</i>    | 0.59892859  |
| 15,592 | <i>HLA-DRA</i>   | 0.59898921  |

|        |                  |             |
|--------|------------------|-------------|
| 15,593 | <i>MMP21</i>     | 0.599548919 |
| 15,594 | <i>SMG1</i>      | 0.599591991 |
| 15,595 | <i>SCAMP4</i>    | 0.600074788 |
| 15,596 | <i>OR6X1</i>     | 0.600326985 |
| 15,597 | <i>UNC5CL</i>    | 0.600695033 |
| 15,598 | <i>UNC5CL</i>    | 0.600695033 |
| 15,599 | <i>RCBTB1</i>    | 0.60140302  |
| 15,600 | <i>GNAT2</i>     | 0.60207055  |
| 15,601 | <i>RER1</i>      | 0.602460927 |
| 15,602 | <i>PHLDB2</i>    | 0.602661601 |
| 15,603 | <i>SLC15A2</i>   | 0.603126189 |
| 15,604 | <i>LOC221091</i> | 0.603434605 |
| 15,605 | <i>RAPGEF6</i>   | 0.603593161 |
| 15,606 | <i>PDCD5</i>     | 0.60367607  |
| 15,607 | <i>BNIP3L</i>    | 0.603901447 |
| 15,608 | <i>GLIS2</i>     | 0.604114256 |
| 15,609 | <i>MAML2</i>     | 0.604334493 |
| 15,610 | <i>CHST7</i>     | 0.605179622 |
| 15,611 | <i>FLJ45803</i>  | 0.605915696 |
| 15,612 | <i>EMID1</i>     | 0.607207255 |
| 15,613 | <i>SEBOX</i>     | 0.607335201 |
| 15,614 | <i>PRSS25</i>    | 0.608016483 |
| 15,615 | <i>CROC4</i>     | 0.608840479 |
| 15,616 | <i>ATP1B2</i>    | 0.608881504 |
| 15,617 | <i>PDZK7</i>     | 0.609082544 |
| 15,618 | <i>CPEB1</i>     | 0.60932222  |
| 15,619 | <i>GPR44</i>     | 0.610011422 |
| 15,620 | <i>FLJ40597</i>  | 0.610018526 |
| 15,621 | <i>FEV</i>       | 0.610062957 |
| 15,622 | <i>GDF9</i>      | 0.610134402 |
| 15,623 | <i>KCNK6</i>     | 0.610334226 |
| 15,624 | <i>VRK2</i>      | 0.610384427 |
| 15,625 | <i>PRSS23</i>    | 0.610795987 |
| 15,626 | <i>LOC157697</i> | 0.610803095 |
| 15,627 | <i>C5ORF3</i>    | 0.61090818  |
| 15,628 | <i>MLLT4</i>     | 0.611087012 |
| 15,629 | <i>INPP1</i>     | 0.611196971 |
| 15,630 | <i>RNF133</i>    | 0.611291919 |
| 15,631 | <i>DKC1</i>      | 0.611553596 |
| 15,632 | <i>TMED5</i>     | 0.611817745 |
| 15,633 | <i>FBN2</i>      | 0.612205744 |
| 15,634 | <i>SERPINA4</i>  | 0.612344552 |
| 15,635 | <i>KNSL8</i>     | 0.612867317 |
| 15,636 | <i>FLJ13291</i>  | 0.613235948 |
| 15,637 | <i>LOXL4</i>     | 0.613346809 |
| 15,638 | <i>PPP1R9B</i>   | 0.613600155 |
| 15,639 | <i>NEU4</i>      | 0.613758512 |

|        |                 |             |
|--------|-----------------|-------------|
| 15,640 | <i>IVNS1ABP</i> | 0.614212764 |
| 15,641 | <i>XAGE-5</i>   | 0.614469356 |
| 15,642 | <i>CCDC9</i>    | 0.614785789 |
| 15,643 | <i>WDR22</i>    | 0.614848799 |
| 15,644 | <i>NP</i>       | 0.615247538 |
| 15,645 | <i>OTUB1</i>    | 0.615590647 |
| 15,646 | <i>GRM8</i>     | 0.616213972 |
| 15,647 | <i>KIAA1618</i> | 0.616667117 |
| 15,648 | <i>PDE7A</i>    | 0.61710366  |
| 15,649 | <i>BAZ2A</i>    | 0.617284555 |
| 15,650 | <i>IRF1</i>     | 0.617359985 |
| 15,651 | <i>SRF</i>      | 0.617549601 |
| 15,652 | <i>LIPG</i>     | 0.617871652 |
| 15,653 | <i>TRPV1</i>    | 0.617908152 |
| 15,654 | <i>C1ORF37</i>  | 0.618316818 |
| 15,655 | <i>MTMR3</i>    | 0.618430031 |
| 15,656 | <i>MGC16491</i> | 0.618612032 |
| 15,657 | <i>EIF2C1</i>   | 0.618654443 |
| 15,658 | <i>NOG</i>      | 0.619295978 |
| 15,659 | <i>COQ4</i>     | 0.619680795 |
| 15,660 | <i>MPO</i>      | 0.619770307 |
| 15,661 | <i>GLT6D1</i>   | 0.620173304 |
| 15,662 | <i>CGI-14</i>   | 0.621323205 |
| 15,663 | <i>MOAP1</i>    | 0.621341741 |
| 15,664 | <i>ADAM32</i>   | 0.621450752 |
| 15,665 | <i>OR51B6</i>   | 0.622193181 |
| 15,666 | <i>AZU1</i>     | 0.622483733 |
| 15,667 | <i>C5ORF16</i>  | 0.622583842 |
| 15,668 | <i>TLN1</i>     | 0.622730219 |
| 15,669 | <i>ANKRD22</i>  | 0.622848109 |
| 15,670 | <i>DNAH3</i>    | 0.623184824 |
| 15,671 | <i>PCDH21</i>   | 0.623671816 |
| 15,672 | <i>RBPSUH</i>   | 0.62419381  |
| 15,673 | <i>CKMT2</i>    | 0.624950336 |
| 15,674 | <i>KLIP1</i>    | 0.625213172 |
| 15,675 | <i>E2F5</i>     | 0.625256599 |
| 15,676 | <i>MAPK11</i>   | 0.625450455 |
| 15,677 | <i>VKORC1L1</i> | 0.626176406 |
| 15,678 | <i>HIST1H3C</i> | 0.626462892 |
| 15,679 | <i>IL16</i>     | 0.626603178 |
| 15,680 | <i>IL16</i>     | 0.626603178 |
| 15,681 | <i>ZNF289</i>   | 0.626724146 |
| 15,682 | <i>ANP32E</i>   | 0.626812444 |
| 15,683 | <i>BPHL</i>     | 0.627276961 |
| 15,684 | <i>CREG2</i>    | 0.627627315 |
| 15,685 | <i>KCNH4</i>    | 0.627652721 |
| 15,686 | <i>KCNA3</i>    | 0.627689559 |

|        |                  |             |
|--------|------------------|-------------|
| 15,687 | <i>GJB1</i>      | 0.628522235 |
| 15,688 | <i>LOC440350</i> | 0.629005347 |
| 15,689 | <i>CFL2</i>      | 0.629161744 |
| 15,690 | <i>CDKN1A</i>    | 0.63049044  |
| 15,691 | <i>KCNMB4</i>    | 0.630689068 |
| 15,692 | <i>SHB</i>       | 0.631197026 |
| 15,693 | <i>LZTS1</i>     | 0.631703544 |
| 15,694 | <i>GAS7</i>      | 0.633164723 |
| 15,695 | <i>HLA-DQA2</i>  | 0.633353818 |
| 15,696 | <i>ZNF9</i>      | 0.633404439 |
| 15,697 | <i>TM6SF2</i>    | 0.634010797 |
| 15,698 | <i>HKR2</i>      | 0.63407099  |
| 15,699 | <i>LRRN3</i>     | 0.634428737 |
| 15,700 | <i>GAS8</i>      | 0.634658924 |
| 15,701 | <i>DHRS1</i>     | 0.635563552 |
| 15,702 | <i>C1ORF40</i>   | 0.63579213  |
| 15,703 | <i>CGI-38</i>    | 0.635888029 |
| 15,704 | <i>FKHL18</i>    | 0.63631058  |
| 15,705 | <i>C9ORF115</i>  | 0.636721674 |
| 15,706 | <i>ATP7B</i>     | 0.636826914 |
| 15,707 | <i>GLP1R</i>     | 0.637244626 |
| 15,708 | <i>LOC284106</i> | 0.63763347  |
| 15,709 | <i>PFKFB3</i>    | 0.637695351 |
| 15,710 | <i>LOC93109</i>  | 0.638204464 |
| 15,711 | <i>ASIP</i>      | 0.638449912 |
| 15,712 | <i>FLJ10769</i>  | 0.638463047 |
| 15,713 | <i>SLC25A2</i>   | 0.638760049 |
| 15,714 | <i>TOMM34</i>    | 0.638877835 |
| 15,715 | <i>DHX38</i>     | 0.639447947 |
| 15,716 | <i>SMARCA3</i>   | 0.639633751 |
| 15,717 | <i>GMPR</i>      | 0.640287948 |
| 15,718 | <i>FANCA</i>     | 0.640785096 |
| 15,719 | <i>SLC12A7</i>   | 0.640925238 |
| 15,720 | <i>FLJ40296</i>  | 0.641165143 |
| 15,721 | <i>HEMGN</i>     | 0.641293364 |
| 15,722 | <i>HEMGN</i>     | 0.641293364 |
| 15,723 | <i>C6ORF163</i>  | 0.641373884 |
| 15,724 | <i>MAP3K1</i>    | 0.64140279  |
| 15,725 | <i>DEGS</i>      | 0.642216432 |
| 15,726 | <i>HIST1H3J</i>  | 0.642680873 |
| 15,727 | <i>ANKRD20A</i>  | 0.643207599 |
| 15,728 | <i>FAM21C</i>    | 0.643238376 |
| 15,729 | <i>GSN</i>       | 0.643373216 |
| 15,730 | <i>TRPC3</i>     | 0.643578579 |
| 15,731 | <i>DCDC2</i>     | 0.643728219 |
| 15,732 | <i>CGI-115</i>   | 0.643776451 |
| 15,733 | <i>SMYD1</i>     | 0.64457008  |

|        |                  |             |
|--------|------------------|-------------|
| 15,734 | <i>GPT</i>       | 0.644947802 |
| 15,735 | <i>MOS</i>       | 0.645198362 |
| 15,736 | <i>DDN</i>       | 0.64571404  |
| 15,737 | <i>EMR4</i>      | 0.64573068  |
| 15,738 | <i>MGC51082</i>  | 0.645802172 |
| 15,739 | <i>CITED4</i>    | 0.646190833 |
| 15,740 | <i>RHOT1</i>     | 0.646220496 |
| 15,741 | <i>XPMC2H</i>    | 0.646243079 |
| 15,742 | <i>MGC48915</i>  | 0.647119424 |
| 15,743 | <i>CCL15</i>     | 0.648792258 |
| 15,744 | <i>CD247</i>     | 0.648841121 |
| 15,745 | <i>CLDN7</i>     | 0.649064705 |
| 15,746 | <i>DUSTYPK</i>   | 0.649402981 |
| 15,747 | <i>MIA3</i>      | 0.649941404 |
| 15,748 | <i>TGIF</i>      | 0.65060829  |
| 15,749 | <i>EIF2A</i>     | 0.650718194 |
| 15,750 | <i>BTN3A3</i>    | 0.651354725 |
| 15,751 | <i>YWHAH</i>     | 0.651405462 |
| 15,752 | <i>NXF</i>       | 0.651461629 |
| 15,753 | <i>SETBP1</i>    | 0.651481108 |
| 15,754 | <i>NXT1</i>      | 0.651704613 |
| 15,755 | <i>LOC157697</i> | 0.652234805 |
| 15,756 | <i>RFXANK</i>    | 0.652250724 |
| 15,757 | <i>LOC146542</i> | 0.652347438 |
| 15,758 | <i>MBD1</i>      | 0.653067219 |
| 15,759 | <i>CALM1</i>     | 0.653212037 |
| 15,760 | <i>FLJ40121</i>  | 0.653346076 |
| 15,761 | <i>FLJ38607</i>  | 0.653371547 |
| 15,762 | <i>EBI2</i>      | 0.653780746 |
| 15,763 | <i>USP13</i>     | 0.655016232 |
| 15,764 | <i>HPD</i>       | 0.655184335 |
| 15,765 | <i>PLXND1</i>    | 0.65523723  |
| 15,766 | <i>ZSWIM2</i>    | 0.655561216 |
| 15,767 | <i>GLUD1</i>     | 0.655730609 |
| 15,768 | <i>ANKRA2</i>    | 0.655961555 |
| 15,769 | <i>PARVB</i>     | 0.656280889 |
| 15,770 | <i>OPTN</i>      | 0.657070379 |
| 15,771 | <i>SLK</i>       | 0.657093247 |
| 15,772 | <i>SH2D1A</i>    | 0.657669409 |
| 15,773 | <i>KIF3B</i>     | 0.657884463 |
| 15,774 | <i>NPR2</i>      | 0.657918371 |
| 15,775 | <i>GIOT-1</i>    | 0.658007191 |
| 15,776 | <i>HOXA4</i>     | 0.658078554 |
| 15,777 | <i>GSC</i>       | 0.658404704 |
| 15,778 | <i>PARP2</i>     | 0.658438515 |
| 15,779 | <i>COX17</i>     | 0.658604653 |
| 15,780 | <i>ADPRHL1</i>   | 0.65872222  |



|        |                    |             |
|--------|--------------------|-------------|
| 15,781 | <i>SAP30</i>       | 0.659492405 |
| 15,782 | <i>ZNF143</i>      | 0.66034123  |
| 15,783 | <i>ADRB2</i>       | 0.660375147 |
| 15,784 | <i>MCFP</i>        | 0.66048267  |
| 15,785 | <i>F5</i>          | 0.660944904 |
| 15,786 | <i>MRGPRX4</i>     | 0.661224413 |
| 15,787 | <i>RABL2A</i>      | 0.662052648 |
| 15,788 | <i>CACNB2</i>      | 0.662241386 |
| 15,789 | <i>DRAP1</i>       | 0.662853452 |
| 15,790 | <i>GZMA</i>        | 0.663606561 |
| 15,791 | <i>RGR</i>         | 0.664594348 |
| 15,792 | <i>TAF4</i>        | 0.664674365 |
| 15,793 | <i>ORC2L</i>       | 0.665174154 |
| 15,794 | <i>SLC9A8</i>      | 0.665254475 |
| 15,795 | <i>ZNF415</i>      | 0.665416401 |
| 15,796 | <i>KIAA1799</i>    | 0.665664323 |
| 15,797 | <i>FLVCR</i>       | 0.666256812 |
| 15,798 | <i>KATNAL1</i>     | 0.666589979 |
| 15,799 | <i>HSPB9</i>       | 0.667227748 |
| 15,800 | <i>EPN2</i>        | 0.667276729 |
| 15,801 | <i>KIAA0310</i>    | 0.667348549 |
| 15,802 | <i>PLA2G2E</i>     | 0.66736528  |
| 15,803 | <i>PITX2</i>       | 0.667709221 |
| 15,804 | <i>RELA</i>        | 0.668149569 |
| 15,805 | <i>SERPINB10</i>   | 0.668515039 |
| 15,806 | <i>RRP22</i>       | 0.668539137 |
| 15,807 | <i>DVL2</i>        | 0.668842239 |
| 15,808 | <i>DNALI1</i>      | 0.669172684 |
| 15,809 | <i>GPRC5B</i>      | 0.669713005 |
| 15,810 | <i>HIST1H2BG</i>   | 0.670121568 |
| 15,811 | <i>BSND</i>        | 0.670506538 |
| 15,812 | <i>PYCRL</i>       | 0.670564334 |
| 15,813 | <i>C14ORF131</i>   | 0.670702301 |
| 15,814 | <i>NT5E</i>        | 0.671194841 |
| 15,815 | <i>PRKACG</i>      | 0.671957669 |
| 15,816 | <i>FLJ20920</i>    | 0.672159296 |
| 15,817 | <i>DFFB</i>        | 0.672192189 |
| 15,818 | <i>FLJ23550</i>    | 0.672766857 |
| 15,819 | <i>SIPL</i>        | 0.672868476 |
| 15,820 | <i>KIAA1221</i>    | 0.673047857 |
| 15,821 | <i>bA16L21.2.1</i> | 0.67317574  |
| 15,822 | <i>IFI30</i>       | 0.673449051 |
| 15,823 | <i>PRIC285</i>     | 0.674385904 |
| 15,824 | <i>FLJ23129</i>    | 0.675039057 |
| 15,825 | <i>OR4C6</i>       | 0.675112851 |
| 15,826 | <i>HIST4H4</i>     | 0.675866653 |
| 15,827 | <i>CCT6B</i>       | 0.67589985  |

|        |                      |             |
|--------|----------------------|-------------|
| 15,828 | <i>BIG1</i>          | 0.67633394  |
| 15,829 | <i>FAM128A</i>       | 0.677008509 |
| 15,830 | <i>TU3A</i>          | 0.677966362 |
| 15,831 | <i>MGC40157</i>      | 0.678842661 |
| 15,832 | <i>ZBTB1</i>         | 0.67894798  |
| 15,833 | <i>ZRANB1</i>        | 0.67956167  |
| 15,834 | <i>MGC17943</i>      | 0.679571225 |
| 15,835 | <i>FLJ14627</i>      | 0.679738383 |
| 15,836 | <i>CEACAM8</i>       | 0.680259736 |
| 15,837 | <i>RCD-8</i>         | 0.680742625 |
| 15,838 | <i>PCSK6</i>         | 0.680855926 |
| 15,839 | <i>KIAA1467</i>      | 0.680936753 |
| 15,840 | <i>PIP</i>           | 0.681600319 |
| 15,841 | <i>OR4A5</i>         | 0.682246995 |
| 15,842 | <i>KCNMA1</i>        | 0.684216976 |
| 15,843 | <i>HSPG2</i>         | 0.684342469 |
| 15,844 | <i>GHRH</i>          | 0.6844829   |
| 15,845 | <i>LEPR</i>          | 0.684653971 |
| 15,846 | <i>FLJ20421</i>      | 0.684843404 |
| 15,847 | <i>SYNE2</i>         | 0.685217069 |
| 15,848 | <i>C9ORF140</i>      | 0.685619782 |
| 15,849 | <i>CCR3</i>          | 0.685832049 |
| 15,850 | <i>MGC23401</i>      | 0.686595685 |
| 15,851 | <i>DMRTC1</i>        | 0.686653095 |
| 15,852 | <i>FLII</i>          | 0.686798703 |
| 15,853 | <i>IF</i>            | 0.68727891  |
| 15,854 | <i>PRKDC</i>         | 0.687456463 |
| 15,855 | <i>PCDH18</i>        | 0.688264131 |
| 15,856 | <i>LOC91181</i>      | 0.68872418  |
| 15,857 | <i>PRKCD</i>         | 0.688812939 |
| 15,858 | <i>RAP2A</i>         | 0.689539494 |
| 15,859 | <i>MGC2494</i>       | 0.689659272 |
| 15,860 | <i>DKFZP434E2321</i> | 0.690469285 |
| 15,861 | <i>GTF2B</i>         | 0.690514523 |
| 15,862 | <i>FLJ44635</i>      | 0.690514696 |
| 15,863 | <i>FLJ32685</i>      | 0.6907033   |
| 15,864 | <i>ZFP28</i>         | 0.691127264 |
| 15,865 | <i>RNF170</i>        | 0.691265478 |
| 15,866 | <i>LIMD1</i>         | 0.691895583 |
| 15,867 | <i>VAT1</i>          | 0.692468849 |
| 15,868 | <i>ABAT</i>          | 0.69269755  |
| 15,869 | <i>ZNF488</i>        | 0.692861066 |
| 15,870 | <i>UNQ6411</i>       | 0.693417751 |
| 15,871 | <i>CD2</i>           | 0.693689985 |
| 15,872 | <i>POLR1B</i>        | 0.694148854 |
| 15,873 | <i>PCSK2</i>         | 0.694239796 |
| 15,874 | <i>GPR125</i>        | 0.694369105 |

|        |                     |             |
|--------|---------------------|-------------|
| 15,875 | <i>IRF6</i>         | 0.694505032 |
| 15,876 | <i>MLLT6</i>        | 0.695018845 |
| 15,877 | <i>BCL2L2</i>       | 0.696236866 |
| 15,878 | <i>ZNF491</i>       | 0.69654543  |
| 15,879 | <i>PRDM6</i>        | 0.697040613 |
| 15,880 | <i>THUMPD3</i>      | 0.697053888 |
| 15,881 | <i>MRGPRX2</i>      | 0.697261932 |
| 15,882 | <i>SGTA</i>         | 0.697304382 |
| 15,883 | <i>RELL1</i>        | 0.697821112 |
| 15,884 | <i>SPARCL1</i>      | 0.697964286 |
| 15,885 | <i>MGC33846</i>     | 0.698144931 |
| 15,886 | <i>ICAM1</i>        | 0.698307412 |
| 15,887 | <i>DJ971N18.2</i>   | 0.698493488 |
| 15,888 | <i>C9ORF138</i>     | 0.698759629 |
| 15,889 | <i>ALPI</i>         | 0.698761213 |
| 15,890 | <i>C14ORF103</i>    | 0.698865876 |
| 15,891 | <i>FAPP2</i>        | 0.698878723 |
| 15,892 | <i>ZBTB10</i>       | 0.698965538 |
| 15,893 | <i>SMUG1</i>        | 0.699852787 |
| 15,894 | <i>TNF</i>          | 0.699950186 |
| 15,895 | <i>SOSTDC1</i>      | 0.700163731 |
| 15,896 | <i>DFFA</i>         | 0.700182178 |
| 15,897 | <i>RNF32</i>        | 0.700437474 |
| 15,898 | <i>KLF8</i>         | 0.700772368 |
| 15,899 | <i>RHOD</i>         | 0.70133972  |
| 15,900 | <i>C21ORF45</i>     | 0.701574543 |
| 15,901 | <i>IFNA4</i>        | 0.70191187  |
| 15,902 | <i>EPHB3</i>        | 0.702209016 |
| 15,903 | <i>FLJ35802</i>     | 0.702451485 |
| 15,904 | <i>EMP2</i>         | 0.702617323 |
| 15,905 | <i>C3</i>           | 0.70332582  |
| 15,906 | <i>GRAP</i>         | 0.703697327 |
| 15,907 | <i>SACM1L</i>       | 0.703953176 |
| 15,908 | <i>DKFZP761G058</i> | 0.704244846 |
| 15,909 | <i>B3GALT4</i>      | 0.704405734 |
| 15,910 | <i>FLJ14503</i>     | 0.705574305 |
| 15,911 | <i>ADM</i>          | 0.7057566   |
| 15,912 | <i>SIAT4A</i>       | 0.705916012 |
| 15,913 | <i>MGC59937</i>     | 0.706879575 |
| 15,914 | <i>LAG3</i>         | 0.707138344 |
| 15,915 | <i>MOCS3</i>        | 0.707734564 |
| 15,916 | <i>MAGEF1</i>       | 0.708551716 |
| 15,917 | <i>FOXO1A</i>       | 0.709382531 |
| 15,918 | <i>CFH</i>          | 0.709466144 |
| 15,919 | <i>SCN3A</i>        | 0.709943578 |
| 15,920 | <i>AAMP</i>         | 0.709950437 |
| 15,921 | <i>ASPSCR1</i>      | 0.71015935  |

|        |                  |             |
|--------|------------------|-------------|
| 15,922 | <i>LPPR2</i>     | 0.711094301 |
| 15,923 | <i>OR7A17</i>    | 0.711825288 |
| 15,924 | <i>SLC9A3R1</i>  | 0.711852994 |
| 15,925 | <i>KIAA1539</i>  | 0.71276202  |
| 15,926 | <i>USF1</i>      | 0.713373334 |
| 15,927 | <i>PFKFB2</i>    | 0.713625883 |
| 15,928 | <i>SLC18A3</i>   | 0.713783624 |
| 15,929 | <i>SLC25A27</i>  | 0.714241853 |
| 15,930 | <i>SGPP1</i>     | 0.714475541 |
| 15,931 | <i>LOC255374</i> | 0.715211161 |
| 15,932 | <i>CRYZL1</i>    | 0.715332804 |
| 15,933 | <i>CDKN3</i>     | 0.715804938 |
| 15,934 | <i>AP3S2</i>     | 0.715868435 |
| 15,935 | <i>ACAA2</i>     | 0.716230642 |
| 15,936 | <i>FLJ42925</i>  | 0.716439601 |
| 15,937 | <i>SIRT2</i>     | 0.71646019  |
| 15,938 | <i>HTR3A</i>     | 0.716892444 |
| 15,939 | <i>LGICZ</i>     | 0.716990075 |
| 15,940 | <i>CD59</i>      | 0.717003718 |
| 15,941 | <i>HLA-DRB4</i>  | 0.717434151 |
| 15,942 | <i>LOC127665</i> | 0.71760063  |
| 15,943 | <i>LDHD</i>      | 0.717763324 |
| 15,944 | <i>SMPD3</i>     | 0.718397149 |
| 15,945 | <i>C7ORF16</i>   | 0.718474862 |
| 15,946 | <i>REM1</i>      | 0.718489688 |
| 15,947 | <i>FLJ32871</i>  | 0.718772603 |
| 15,948 | <i>OPRM1</i>     | 0.718974506 |
| 15,949 | <i>CDKN2D</i>    | 0.719238003 |
| 15,950 | <i>RIPX</i>      | 0.719344196 |
| 15,951 | <i>C3AR1</i>     | 0.719399462 |
| 15,952 | <i>CKAP1</i>     | 0.719505    |
| 15,953 | <i>C20ORF136</i> | 0.719985506 |
| 15,954 | <i>ANKIB1</i>    | 0.720199532 |
| 15,955 | <i>FLJ23577</i>  | 0.720488793 |
| 15,956 | <i>AP2A1</i>     | 0.720532483 |
| 15,957 | <i>OR52N4</i>    | 0.721398767 |
| 15,958 | <i>FLJ13052</i>  | 0.721429301 |
| 15,959 | <i>LCN12</i>     | 0.722525632 |
| 15,960 | <i>KIAA0652</i>  | 0.723118846 |
| 15,961 | <i>RASSF1</i>    | 0.723302711 |
| 15,962 | <i>OR5F1</i>     | 0.723735108 |
| 15,963 | <i>SDS3</i>      | 0.723758515 |
| 15,964 | <i>MFAP2</i>     | 0.725074927 |
| 15,965 | <i>PRSSL1</i>    | 0.725219009 |
| 15,966 | <i>FNDC4</i>     | 0.726008292 |
| 15,967 | <i>ITGB3</i>     | 0.726112203 |
| 15,968 | <i>USP10</i>     | 0.72640325  |

|        |           |             |
|--------|-----------|-------------|
| 15,969 | ZYX       | 0.726659197 |
| 15,970 | SPANXA1   | 0.726816084 |
| 15,971 | CNOT10    | 0.726960052 |
| 15,972 | STXBP2    | 0.727103651 |
| 15,973 | RNF121    | 0.727276779 |
| 15,974 | C9ORF103  | 0.727426793 |
| 15,975 | LOC63929  | 0.727535151 |
| 15,976 | HP1-BP74  | 0.727558342 |
| 15,977 | RGN       | 0.727598795 |
| 15,978 | PEF1      | 0.728347378 |
| 15,979 | MCC       | 0.728448287 |
| 15,980 | PIP5K2C   | 0.728837029 |
| 15,981 | CD5       | 0.72884408  |
| 15,982 | SLPI      | 0.729179455 |
| 15,983 | OSCAR     | 0.729716495 |
| 15,984 | MDS028    | 0.730056972 |
| 15,985 | ZNF354B   | 0.730070925 |
| 15,986 | OR2K2     | 0.730351623 |
| 15,987 | KIAA1069  | 0.730649351 |
| 15,988 | FLJ23420  | 0.730711749 |
| 15,989 | SHREW1    | 0.731356912 |
| 15,990 | ANKRD27   | 0.732120276 |
| 15,991 | PDCD6IP   | 0.732620014 |
| 15,992 | TCF7      | 0.73345747  |
| 15,993 | ZBTB5     | 0.733656144 |
| 15,994 | PPFIA2    | 0.733996868 |
| 15,995 | ARD1      | 0.734135375 |
| 15,996 | KRTCAP2   | 0.73420485  |
| 15,997 | MGC3130   | 0.734605414 |
| 15,998 | SIL       | 0.734613828 |
| 15,999 | FLJ30990  | 0.734727222 |
| 16,000 | KCNE4     | 0.734740389 |
| 16,001 | MYH14     | 0.734745889 |
| 16,002 | FEM1B     | 0.735387144 |
| 16,003 | FLJ40083  | 0.735792324 |
| 16,004 | PCDH7     | 0.736235747 |
| 16,005 | TP53BP2   | 0.736444136 |
| 16,006 | RSU1      | 0.736864632 |
| 16,007 | PMVK      | 0.737581965 |
| 16,008 | ACAA1     | 0.737696394 |
| 16,009 | IL12B     | 0.737759548 |
| 16,010 | PTCH      | 0.737775797 |
| 16,011 | CHD9      | 0.737914952 |
| 16,012 | NCBP1     | 0.73823699  |
| 16,013 | C20ORF102 | 0.738617864 |
| 16,014 | OR4X2     | 0.738624554 |
| 16,015 | KATNA1    | 0.738730626 |

|        |                  |             |
|--------|------------------|-------------|
| 16,016 | <i>NQO3A2</i>    | 0.739580703 |
| 16,017 | <i>MAP3K7IP2</i> | 0.740466463 |
| 16,018 | <i>LOC388610</i> | 0.740472147 |
| 16,019 | <i>LOC152098</i> | 0.74127241  |
| 16,020 | <i>CST9</i>      | 0.741943327 |
| 16,021 | <i>GNPDA2</i>    | 0.742063189 |
| 16,022 | <i>CEPT1</i>     | 0.742288426 |
| 16,023 | <i>STAMBPL1</i>  | 0.743240109 |
| 16,024 | <i>SRGAP2</i>    | 0.743346025 |
| 16,025 | <i>MGC35194</i>  | 0.743911809 |
| 16,026 | <i>TTC18</i>     | 0.744474187 |
| 16,027 | <i>GIMAP6</i>    | 0.744926897 |
| 16,028 | <i>IL17RD</i>    | 0.746039636 |
| 16,029 | <i>C9ORF121</i>  | 0.746571105 |
| 16,030 | <i>FAM14B</i>    | 0.747354082 |
| 16,031 | <i>ZNF16</i>     | 0.747554373 |
| 16,032 | <i>KIAA1189</i>  | 0.747949381 |
| 16,033 | <i>LOC92312</i>  | 0.748567648 |
| 16,034 | <i>PPAP2B</i>    | 0.749595974 |
| 16,035 | <i>CORO1A</i>    | 0.750387678 |
| 16,036 | <i>ME3</i>       | 0.750419071 |
| 16,037 | <i>C20ORF160</i> | 0.750616116 |
| 16,038 | <i>FLJ25067</i>  | 0.751068411 |
| 16,039 | <i>HUS1B</i>     | 0.751799258 |
| 16,040 | <i>LOC343702</i> | 0.752183566 |
| 16,041 | <i>ME2</i>       | 0.752435164 |
| 16,042 | <i>OR5H15</i>    | 0.752440302 |
| 16,043 | <i>LENEP</i>     | 0.752589836 |
| 16,044 | <i>ZFHX1B</i>    | 0.752661443 |
| 16,045 | <i>NDUFA5</i>    | 0.753534737 |
| 16,046 | <i>SDSL</i>      | 0.75371856  |
| 16,047 | <i>MARS</i>      | 0.753933925 |
| 16,048 | <i>SEC24A</i>    | 0.754231332 |
| 16,049 | <i>BXDC1</i>     | 0.754588362 |
| 16,050 | <i>MBP</i>       | 0.754667113 |
| 16,051 | <i>DEPDC2</i>    | 0.755768905 |
| 16,052 | <i>ID3</i>       | 0.756575446 |
| 16,053 | <i>OR51Q1</i>    | 0.756664618 |
| 16,054 | <i>TSGA14</i>    | 0.756953595 |
| 16,055 | <i>C9ORF36</i>   | 0.757023979 |
| 16,056 | <i>KIAA1600</i>  | 0.757204335 |
| 16,057 | <i>PTE1</i>      | 0.757264684 |
| 16,058 | <i>CASP8AP2</i>  | 0.757752422 |
| 16,059 | <i>SBDS</i>      | 0.758583242 |
| 16,060 | <i>HES6</i>      | 0.759122492 |
| 16,061 | <i>HIST1H2AM</i> | 0.759171469 |
| 16,062 | <i>SLC25A34</i>  | 0.759175083 |

|        |              |             |
|--------|--------------|-------------|
| 16,063 | KCNJ16       | 0.759452927 |
| 16,064 | PTPN14       | 0.759525797 |
| 16,065 | HNF4G        | 0.76057581  |
| 16,066 | TOSO         | 0.761077562 |
| 16,067 | ISL2         | 0.761205779 |
| 16,068 | GIT2         | 0.763427114 |
| 16,069 | FLJ20509     | 0.763982171 |
| 16,070 | CDC16        | 0.765169146 |
| 16,071 | HRC          | 0.765779764 |
| 16,072 | CROCC        | 0.766067684 |
| 16,073 | LOC492311    | 0.76612663  |
| 16,074 | PGLYRP1      | 0.766548128 |
| 16,075 | BBS1         | 0.7687849   |
| 16,076 | FLJ32702     | 0.769266847 |
| 16,077 | HACE1        | 0.769689682 |
| 16,078 | TULP3        | 0.769775883 |
| 16,079 | TUBE1        | 0.769950189 |
| 16,080 | ZWINT        | 0.770347951 |
| 16,081 | NET1         | 0.770834089 |
| 16,082 | NET1         | 0.770834089 |
| 16,083 | OAZ2         | 0.770914768 |
| 16,084 | LOC401509    | 0.7716179   |
| 16,085 | MGC33488     | 0.7721129   |
| 16,086 | LOC90378     | 0.773425953 |
| 16,087 | POLQ         | 0.773978302 |
| 16,088 | DKFZP761H079 | 0.773991505 |
| 16,089 | SATL1        | 0.77440983  |
| 16,090 | CFLAR        | 0.775099368 |
| 16,091 | HARSL        | 0.775153694 |
| 16,092 | RNF148       | 0.775322587 |
| 16,093 | LOC340578    | 0.775496886 |
| 16,094 | OR4F29       | 0.775586188 |
| 16,095 | C20ORF179    | 0.775586188 |
| 16,096 | BBS4         | 0.775696645 |
| 16,097 | RBP1         | 0.776021049 |
| 16,098 | FLJ00038     | 0.776326778 |
| 16,099 | C14ORF44     | 0.776925913 |
| 16,100 | ZNF514       | 0.777419619 |
| 16,101 | PMCH         | 0.777671252 |
| 16,102 | ST6GALNAC1   | 0.777676148 |
| 16,103 | LMTK3        | 0.779135067 |
| 16,104 | EMR2         | 0.779369846 |
| 16,105 | ASNA1        | 0.779377581 |
| 16,106 | ATF1         | 0.779391666 |
| 16,107 | BACH1        | 0.779408056 |
| 16,108 | T1A-2        | 0.779483512 |
| 16,109 | NCL          | 0.779517773 |

|        |                      |             |
|--------|----------------------|-------------|
| 16,110 | <i>C9ORF28</i>       | 0.779543956 |
| 16,111 | <i>CAV1</i>          | 0.779927015 |
| 16,112 | <i>NBPF10</i>        | 0.779943087 |
| 16,113 | <i>HOXB9</i>         | 0.780301877 |
| 16,114 | <i>SPP2</i>          | 0.780433866 |
| 16,115 | <i>FLJ11280</i>      | 0.781245796 |
| 16,116 | <i>DRB1</i>          | 0.781973897 |
| 16,117 | <i>RP11-544M22.4</i> | 0.782282611 |
| 16,118 | <i>THAP8</i>         | 0.782679969 |
| 16,119 | <i>RUVBL1</i>        | 0.783019938 |
| 16,120 | <i>PTD004</i>        | 0.78334287  |
| 16,121 | <i>ABCB9</i>         | 0.783416505 |
| 16,122 | <i>RWDD2</i>         | 0.783605549 |
| 16,123 | <i>C20ORF172</i>     | 0.783633168 |
| 16,124 | <i>OR52K2</i>        | 0.783863124 |
| 16,125 | <i>RBP7</i>          | 0.784647477 |
| 16,126 | <i>TMEM19</i>        | 0.785657847 |
| 16,127 | <i>DNAJD1</i>        | 0.786769697 |
| 16,128 | <i>OR2D2</i>         | 0.786957295 |
| 16,129 | <i>CORO1B</i>        | 0.787278564 |
| 16,130 | <i>DMN</i>           | 0.787820851 |
| 16,131 | <i>GJE1</i>          | 0.78819929  |
| 16,132 | <i>PRAMEF9</i>       | 0.788425303 |
| 16,133 | <i>CBL</i>           | 0.789047994 |
| 16,134 | <i>NT5C1B</i>        | 0.789167057 |
| 16,135 | <i>DGKD</i>          | 0.789422641 |
| 16,136 | <i>LOC51244</i>      | 0.789567096 |
| 16,137 | <i>OSBPL10</i>       | 0.790099338 |
| 16,138 | <i>TTC21A</i>        | 0.790137036 |
| 16,139 | <i>LOC202459</i>     | 0.79020001  |
| 16,140 | <i>MMP16</i>         | 0.790603656 |
| 16,141 | <i>MESDC1</i>        | 0.791234453 |
| 16,142 | <i>KLIP1</i>         | 0.791582182 |
| 16,143 | <i>C20ORF36</i>      | 0.792147708 |
| 16,144 | <i>CASQ2</i>         | 0.792313066 |
| 16,145 | <i>WDR4</i>          | 0.792902468 |
| 16,146 | <i>REV1L</i>         | 0.793207924 |
| 16,147 | <i>TIMM10</i>        | 0.793370491 |
| 16,148 | <i>PPAN</i>          | 0.793584797 |
| 16,149 | <i>UBPH</i>          | 0.793682136 |
| 16,150 | <i>IL18</i>          | 0.793951195 |
| 16,151 | <i>MGC99813</i>      | 0.794435096 |
| 16,152 | <i>BAAT</i>          | 0.795379708 |
| 16,153 | <i>NTAN1</i>         | 0.796387746 |
| 16,154 | <i>PKD2L1</i>        | 0.797132838 |
| 16,155 | <i>MYL1</i>          | 0.797241934 |
| 16,156 | <i>PLCB2</i>         | 0.797278733 |



|        |                  |             |
|--------|------------------|-------------|
| 16,157 | <i>BCLP</i>      | 0.797629881 |
| 16,158 | <i>CDK3</i>      | 0.797666715 |
| 16,159 | <i>C14ORF24</i>  | 0.797903303 |
| 16,160 | <i>ELAVL2</i>    | 0.797975236 |
| 16,161 | <i>NQO1</i>      | 0.798362882 |
| 16,162 | <i>FLJ30313</i>  | 0.799426    |
| 16,163 | <i>ZADH2</i>     | 0.79983257  |
| 16,164 | <i>L3MBTL</i>    | 0.800629536 |
| 16,165 | <i>SCHIP1</i>    | 0.800649832 |
| 16,166 | <i>NDRG1</i>     | 0.801591548 |
| 16,167 | <i>TRIP11</i>    | 0.801904286 |
| 16,168 | <i>LOC91353</i>  | 0.803445968 |
| 16,169 | <i>FAT</i>       | 0.803952565 |
| 16,170 | <i>C14ORF160</i> | 0.80406139  |
| 16,171 | <i>GRK1</i>      | 0.804195598 |
| 16,172 | <i>ATP8B1</i>    | 0.804654336 |
| 16,173 | <i>ATP4B</i>     | 0.804667967 |
| 16,174 | <i>HIST1H2AD</i> | 0.804816545 |
| 16,175 | <i>FLJ11171</i>  | 0.804925763 |
| 16,176 | <i>LENG9</i>     | 0.805194766 |
| 16,177 | <i>SPRR1B</i>    | 0.805323902 |
| 16,178 | <i>MRPS11</i>    | 0.805340826 |
| 16,179 | <i>ITGB1BP3</i>  | 0.805861502 |
| 16,180 | <i>MXI1</i>      | 0.80670823  |
| 16,181 | <i>COPS3</i>     | 0.806747305 |
| 16,182 | <i>HLA-DPA1</i>  | 0.806877436 |
| 16,183 | <i>ZNF347</i>    | 0.80713433  |
| 16,184 | <i>PACSIN3</i>   | 0.807341664 |
| 16,185 | <i>FBXO34</i>    | 0.807428278 |
| 16,186 | <i>ASXL1</i>     | 0.807646499 |
| 16,187 | <i>ACMSD</i>     | 0.808771001 |
| 16,188 | <i>PKHD1</i>     | 0.810121161 |
| 16,189 | <i>MGC15763</i>  | 0.810131425 |
| 16,190 | <i>POLR2E</i>    | 0.810353397 |
| 16,191 | <i>DLGAP1</i>    | 0.810443056 |
| 16,192 | <i>THOP1</i>     | 0.810920269 |
| 16,193 | <i>PPP1R13B</i>  | 0.811398002 |
| 16,194 | <i>SRD5A2L2</i>  | 0.812863401 |
| 16,195 | <i>LOC51249</i>  | 0.813047482 |
| 16,196 | <i>SNTB1</i>     | 0.813463931 |
| 16,197 | <i>ANKRD21</i>   | 0.81380399  |
| 16,198 | <i>CG018</i>     | 0.813892371 |
| 16,199 | <i>ZCCHC11</i>   | 0.814439212 |
| 16,200 | <i>CCDC50</i>    | 0.814468586 |
| 16,201 | <i>ACAS2</i>     | 0.814824621 |
| 16,202 | <i>ZNF34</i>     | 0.815064661 |
| 16,203 | <i>L3MBTL3</i>   | 0.815836547 |

|        |                      |             |
|--------|----------------------|-------------|
| 16,204 | <i>SMURF1</i>        | 0.815839015 |
| 16,205 | <i>LOC163131</i>     | 0.816151741 |
| 16,206 | <i>ACP5</i>          | 0.816585222 |
| 16,207 | <i>SHANK1</i>        | 0.817168786 |
| 16,208 | <i>LOC728215</i>     | 0.818350625 |
| 16,209 | <i>SERPINB13</i>     | 0.818644182 |
| 16,210 | <i>CD207</i>         | 0.818993958 |
| 16,211 | <i>NUBP1</i>         | 0.819116295 |
| 16,212 | <i>KIAA1363</i>      | 0.819134659 |
| 16,213 | <i>LOC389932</i>     | 0.819195138 |
| 16,214 | <i>SLC22A16</i>      | 0.819254922 |
| 16,215 | <i>GPR156</i>        | 0.819612536 |
| 16,216 | <i>RABGAP1</i>       | 0.820104976 |
| 16,217 | <i>ACTRT1</i>        | 0.820864309 |
| 16,218 | <i>SLC6A16</i>       | 0.821060613 |
| 16,219 | <i>NSF</i>           | 0.821585438 |
| 16,220 | <i>PFS2</i>          | 0.822170088 |
| 16,221 | <i>MGC22793</i>      | 0.823029078 |
| 16,222 | <i>AQP1</i>          | 0.823147156 |
| 16,223 | <i>ABTB1</i>         | 0.824209338 |
| 16,224 | <i>KIAA1049</i>      | 0.8246886   |
| 16,225 | <i>HUNK</i>          | 0.824776054 |
| 16,226 | <i>MGC33692</i>      | 0.82579256  |
| 16,227 | <i>C14ORF124</i>     | 0.826429818 |
| 16,228 | <i>ATAD3A</i>        | 0.826546645 |
| 16,229 | <i>ZNF160</i>        | 0.826721854 |
| 16,230 | <i>IRAK3</i>         | 0.827190096 |
| 16,231 | <i>FGF22</i>         | 0.827362522 |
| 16,232 | <i>JPH1</i>          | 0.828488618 |
| 16,233 | <i>LOC653659</i>     | 0.828548079 |
| 16,234 | <i>ANKRD25</i>       | 0.828942052 |
| 16,235 | <i>GUSB</i>          | 0.829028005 |
| 16,236 | <i>DKFZP547K1113</i> | 0.829217802 |
| 16,237 | <i>LUZP6</i>         | 0.829859948 |
| 16,238 | <i>C10ORF104</i>     | 0.830106602 |
| 16,239 | <i>CR1</i>           | 0.830840047 |
| 16,240 | <i>PSCD1</i>         | 0.830864809 |
| 16,241 | <i>ROD1</i>          | 0.830992444 |
| 16,242 | <i>STEAP4</i>        | 0.831127755 |
| 16,243 | <i>PRDX6</i>         | 0.832670262 |
| 16,244 | <i>ADAMTS14</i>      | 0.833262079 |
| 16,245 | <i>C2ORF16</i>       | 0.833528991 |
| 16,246 | <i>VIPR1</i>         | 0.834391969 |
| 16,247 | <i>FLJ31434</i>      | 0.835366067 |
| 16,248 | <i>LOC387638</i>     | 0.836258105 |
| 16,249 | <i>MMP23B</i>        | 0.83664339  |
| 16,250 | <i>CAV2</i>          | 0.836737456 |

|        |                   |             |
|--------|-------------------|-------------|
| 16,251 | <i>ATP1B4</i>     | 0.836832737 |
| 16,252 | <i>ZNF562</i>     | 0.837010742 |
| 16,253 | <i>CACNA1C</i>    | 0.837248408 |
| 16,254 | <i>C7ORF21</i>    | 0.837465003 |
| 16,255 | <i>TPH2</i>       | 0.837648513 |
| 16,256 | <i>CYP2J2</i>     | 0.837807836 |
| 16,257 | <i>TTC4</i>       | 0.838156494 |
| 16,258 | <i>SLC23A1</i>    | 0.838178324 |
| 16,259 | <i>CXCL12</i>     | 0.839053637 |
| 16,260 | <i>FLJ21919</i>   | 0.839971657 |
| 16,261 | <i>MGC34761</i>   | 0.840059847 |
| 16,262 | <i>SOS2</i>       | 0.840383732 |
| 16,263 | <i>TCF7L1</i>     | 0.841068689 |
| 16,264 | <i>FHL1</i>       | 0.84180221  |
| 16,265 | <i>SLC10A5</i>    | 0.841832106 |
| 16,266 | <i>BZRPL1</i>     | 0.841933316 |
| 16,267 | <i>LOC389827</i>  | 0.842034305 |
| 16,268 | <i>KRTAP20-3</i>  | 0.842490735 |
| 16,269 | <i>GAB1</i>       | 0.842767993 |
| 16,270 | <i>API5</i>       | 0.84301218  |
| 16,271 | <i>MYO18B</i>     | 0.843177904 |
| 16,272 | <i>DHCR7</i>      | 0.843239964 |
| 16,273 | <i>C21ORF106</i>  | 0.843988369 |
| 16,274 | <i>PPP2R2B</i>    | 0.844448007 |
| 16,275 | <i>ICAM5</i>      | 0.844627392 |
| 16,276 | <i>SNTG2</i>      | 0.844719121 |
| 16,277 | <i>BCAS3</i>      | 0.845532738 |
| 16,278 | <i>FLJ14281</i>   | 0.846064391 |
| 16,279 | <i>PRKAA1</i>     | 0.847771956 |
| 16,280 | <i>C14ORF37</i>   | 0.848203045 |
| 16,281 | <i>SIGLEC10</i>   | 0.848520283 |
| 16,282 | <i>C15ORF12</i>   | 0.849121531 |
| 16,283 | <i>AVPR2</i>      | 0.849709478 |
| 16,284 | <i>LOC401720</i>  | 0.849829911 |
| 16,285 | <i>DUSP8</i>      | 0.851038242 |
| 16,286 | <i>ST6GALNAC3</i> | 0.851165529 |
| 16,287 | <i>OR2L3</i>      | 0.851264372 |
| 16,288 | <i>GA17</i>       | 0.851517315 |
| 16,289 | <i>ATP5H</i>      | 0.852152333 |
| 16,290 | <i>SLC22A6</i>    | 0.852505624 |
| 16,291 | <i>ACE</i>        | 0.852612828 |
| 16,292 | <i>PWP2H</i>      | 0.852951525 |
| 16,293 | <i>TDGF1</i>      | 0.853281657 |
| 16,294 | <i>FLJ35530</i>   | 0.853395045 |
| 16,295 | <i>C10ORF99</i>   | 0.853490292 |
| 16,296 | <i>ATP5D</i>      | 0.854163493 |
| 16,297 | <i>OR51B2</i>     | 0.854746073 |

|        |                      |             |
|--------|----------------------|-------------|
| 16,298 | <i>XPOT</i>          | 0.854767966 |
| 16,299 | <i>LOC124773</i>     | 0.855327781 |
| 16,300 | <i>ISG20</i>         | 0.856145749 |
| 16,301 | <i>EIF3S6IP</i>      | 0.856261962 |
| 16,302 | <i>PAK3</i>          | 0.856745669 |
| 16,303 | <i>IHH</i>           | 0.858171836 |
| 16,304 | <i>NXN</i>           | 0.858522707 |
| 16,305 | <i>PSG3</i>          | 0.859558923 |
| 16,306 | <i>FNDC3B</i>        | 0.859637483 |
| 16,307 | <i>HLC-8</i>         | 0.860064635 |
| 16,308 | <i>CNN1</i>          | 0.860861763 |
| 16,309 | <i>TPST1</i>         | 0.861046776 |
| 16,310 | <i>IREB2</i>         | 0.861129523 |
| 16,311 | <i>SLC35A2</i>       | 0.861291857 |
| 16,312 | <i>HIBADH</i>        | 0.861488622 |
| 16,313 | <i>DKFZP564K1964</i> | 0.861508661 |
| 16,314 | <i>TLR10</i>         | 0.861528088 |
| 16,315 | <i>ARMC3</i>         | 0.862425218 |
| 16,316 | <i>C22ORF1</i>       | 0.862431767 |
| 16,317 | <i>LIPH</i>          | 0.862514237 |
| 16,318 | <i>C14ORF126</i>     | 0.862530395 |
| 16,319 | <i>STK10</i>         | 0.862601315 |
| 16,320 | <i>MGC15476</i>      | 0.862730816 |
| 16,321 | <i>UHMK1</i>         | 0.862926213 |
| 16,322 | <i>FLJ43965</i>      | 0.863449152 |
| 16,323 | <i>CENPA</i>         | 0.864745057 |
| 16,324 | <i>GP6</i>           | 0.86517234  |
| 16,325 | <i>HES6</i>          | 0.86551438  |
| 16,326 | <i>ATP12A</i>        | 0.866587689 |
| 16,327 | <i>LRRC4</i>         | 0.866618821 |
| 16,328 | <i>HOXB6</i>         | 0.866807249 |
| 16,329 | <i>PEX5</i>          | 0.86685512  |
| 16,330 | <i>TGFB2</i>         | 0.867822351 |
| 16,331 | <i>SLC35B2</i>       | 0.868046756 |
| 16,332 | <i>LOC497190</i>     | 0.868570452 |
| 16,333 | <i>SLC30A5</i>       | 0.868671401 |
| 16,334 | <i>BJ-TSA-9</i>      | 0.869062229 |
| 16,335 | <i>BIRC3</i>         | 0.869371199 |
| 16,336 | <i>OR6C68</i>        | 0.869626996 |
| 16,337 | <i>C4B</i>           | 0.869633467 |
| 16,338 | <i>AGPAT4</i>        | 0.869795553 |
| 16,339 | <i>SUOX</i>          | 0.870058929 |
| 16,340 | <i>TBK1</i>          | 0.870656684 |
| 16,341 | <i>OR8B8</i>         | 0.871500772 |
| 16,342 | <i>RNF133</i>        | 0.871921142 |
| 16,343 | <i>REG4</i>          | 0.872772822 |
| 16,344 | <i>FLJ10074</i>      | 0.87304353  |

|        |                  |             |
|--------|------------------|-------------|
| 16,345 | <i>PKMYT1</i>    | 0.874571386 |
| 16,346 | <i>TRPM8</i>     | 0.876151027 |
| 16,347 | <i>MGC20579</i>  | 0.876342814 |
| 16,348 | <i>GSTO2</i>     | 0.876798297 |
| 16,349 | <i>NCOA3</i>     | 0.877902844 |
| 16,350 | <i>ZNF586</i>    | 0.879299982 |
| 16,351 | <i>MTMR1</i>     | 0.880160347 |
| 16,352 | <i>FRBZ1</i>     | 0.880701582 |
| 16,353 | <i>SLC35F3</i>   | 0.881636202 |
| 16,354 | <i>B2M</i>       | 0.882250943 |
| 16,355 | <i>CHAF1B</i>    | 0.882935846 |
| 16,356 | <i>TULP1</i>     | 0.882997378 |
| 16,357 | <i>HOP</i>       | 0.883216692 |
| 16,358 | <i>TNFAIP1</i>   | 0.883499558 |
| 16,359 | <i>ZCCHC10</i>   | 0.883769382 |
| 16,360 | <i>CLPS</i>      | 0.884012715 |
| 16,361 | <i>HS3ST1</i>    | 0.884193911 |
| 16,362 | <i>HYPC</i>      | 0.884599972 |
| 16,363 | <i>FLJ10315</i>  | 0.885211957 |
| 16,364 | <i>BTD</i>       | 0.885663987 |
| 16,365 | <i>MARK2</i>     | 0.886038605 |
| 16,366 | <i>MGC3731</i>   | 0.88650008  |
| 16,367 | <i>TDG</i>       | 0.886640929 |
| 16,368 | <i>NPPC</i>      | 0.88677625  |
| 16,369 | <i>RFX5</i>      | 0.887012652 |
| 16,370 | <i>HDAC9</i>     | 0.887193392 |
| 16,371 | <i>RGS18</i>     | 0.888926093 |
| 16,372 | <i>DECR1</i>     | 0.889392645 |
| 16,373 | <i>TRIM4</i>     | 0.889573609 |
| 16,374 | <i>PAX8</i>      | 0.890273246 |
| 16,375 | <i>PITX1</i>     | 0.890384019 |
| 16,376 | <i>SYNGR2</i>    | 0.891149813 |
| 16,377 | <i>TLE3</i>      | 0.891219774 |
| 16,378 | <i>GPX2</i>      | 0.891257986 |
| 16,379 | <i>H3F3A</i>     | 0.891371623 |
| 16,380 | <i>LOC644168</i> | 0.891625228 |
| 16,381 | <i>RPS6KC1</i>   | 0.892810209 |
| 16,382 | <i>C6ORF75</i>   | 0.894133079 |
| 16,383 | <i>NUDT4</i>     | 0.894245324 |
| 16,384 | <i>C3ORF4</i>    | 0.894759223 |
| 16,385 | <i>AHI1</i>      | 0.896195937 |
| 16,386 | <i>LAMC2</i>     | 0.896264796 |
| 16,387 | <i>MPV17</i>     | 0.897626677 |
| 16,388 | <i>C7ORF24</i>   | 0.898050344 |
| 16,389 | <i>EFNB3</i>     | 0.898114247 |
| 16,390 | <i>ZBTB7</i>     | 0.898218588 |
| 16,391 | <i>SCT</i>       | 0.898687732 |

|        |                   |             |
|--------|-------------------|-------------|
| 16,392 | <i>LMBR1L</i>     | 0.899045278 |
| 16,393 | <i>GLIPR1</i>     | 0.899341886 |
| 16,394 | <i>TRIM17</i>     | 0.900271841 |
| 16,395 | <i>CNGA2</i>      | 0.900314474 |
| 16,396 | <i>PGPEP1</i>     | 0.901028888 |
| 16,397 | <i>IQCA</i>       | 0.901081562 |
| 16,398 | <i>C13ORF1</i>    | 0.901443191 |
| 16,399 | <i>C13ORF1</i>    | 0.901443191 |
| 16,400 | <i>C5</i>         | 0.901514033 |
| 16,401 | <i>MAP2K5</i>     | 0.902211373 |
| 16,402 | <i>NOL1</i>       | 0.902751844 |
| 16,403 | <i>GNG7</i>       | 0.903023399 |
| 16,404 | <i>PPP2R1B</i>    | 0.903137702 |
| 16,405 | <i>U2AF1L2</i>    | 0.90317823  |
| 16,406 | <i>PRODH2</i>     | 0.90321687  |
| 16,407 | <i>LMLN</i>       | 0.904701144 |
| 16,408 | <i>LOC115509</i>  | 0.904752857 |
| 16,409 | <i>AFAP</i>       | 0.904797228 |
| 16,410 | <i>FLJ21924</i>   | 0.904797228 |
| 16,411 | <i>TFCP2L2</i>    | 0.905180334 |
| 16,412 | <i>CGI-09</i>     | 0.905471193 |
| 16,413 | <i>GNAI2</i>      | 0.90584067  |
| 16,414 | <i>TNFRSF13C</i>  | 0.907066838 |
| 16,415 | <i>THRB</i>       | 0.907607118 |
| 16,416 | <i>DJ462023.2</i> | 0.907798669 |
| 16,417 | <i>TSAP6</i>      | 0.908069585 |
| 16,418 | <i>CLOCK</i>      | 0.910545736 |
| 16,419 | <i>SMCR8</i>      | 0.911092455 |
| 16,420 | <i>GCNT1</i>      | 0.912140885 |
| 16,421 | <i>SLC37A2</i>    | 0.912199912 |
| 16,422 | <i>C14ORF92</i>   | 0.912244339 |
| 16,423 | <i>FLJ10700</i>   | 0.913117156 |
| 16,424 | <i>SEC10L1</i>    | 0.913543531 |
| 16,425 | <i>GAS2</i>       | 0.914195364 |
| 16,426 | <i>TBX18</i>      | 0.91497517  |
| 16,427 | <i>OCRL</i>       | 0.915364918 |
| 16,428 | <i>HSPA12B</i>    | 0.915393544 |
| 16,429 | <i>TTC6</i>       | 0.915596637 |
| 16,430 | <i>AMIGO3</i>     | 0.916006052 |
| 16,431 | <i>HS6ST1</i>     | 0.916408345 |
| 16,432 | <i>SRP19</i>      | 0.916774858 |
| 16,433 | <i>GPR126</i>     | 0.917056023 |
| 16,434 | <i>C16ORF44</i>   | 0.918708281 |
| 16,435 | <i>REXO1</i>      | 0.919074909 |
| 16,436 | <i>TRAPPC1</i>    | 0.919188679 |
| 16,437 | <i>FLJ00133</i>   | 0.919769194 |
| 16,438 | <i>PROL1</i>      | 0.920777817 |

|        |                  |             |
|--------|------------------|-------------|
| 16,439 | <i>FLJ37549</i>  | 0.921029439 |
| 16,440 | <i>POU3F1</i>    | 0.921350606 |
| 16,441 | <i>LOC285429</i> | 0.921449521 |
| 16,442 | <i>KCNK15</i>    | 0.921700704 |
| 16,443 | <i>PPP1R12C</i>  | 0.922464718 |
| 16,444 | <i>EPGN</i>      | 0.92331288  |
| 16,445 | <i>TCF2</i>      | 0.924569785 |
| 16,446 | <i>TAF1A</i>     | 0.924693879 |
| 16,447 | <i>FLJ46354</i>  | 0.924863643 |
| 16,448 | <i>LGR6</i>      | 0.925339346 |
| 16,449 | <i>TRIM26</i>    | 0.926426174 |
| 16,450 | <i>ELOVL3</i>    | 0.926437059 |
| 16,451 | <i>BCKDHB</i>    | 0.92734498  |
| 16,452 | <i>MTM1</i>      | 0.927557985 |
| 16,453 | <i>VPREB3</i>    | 0.929098683 |
| 16,454 | <i>RNF167</i>    | 0.929250613 |
| 16,455 | <i>UGT1A1</i>    | 0.930349943 |
| 16,456 | <i>CDC34</i>     | 0.930357729 |
| 16,457 | <i>UNQ846</i>    | 0.930430291 |
| 16,458 | <i>NASP</i>      | 0.931129165 |
| 16,459 | <i>SMAD5</i>     | 0.931220441 |
| 16,460 | <i>PSKH2</i>     | 0.931958341 |
| 16,461 | <i>FLJ12770</i>  | 0.932014768 |
| 16,462 | <i>AADAT</i>     | 0.932137915 |
| 16,463 | <i>HOXD11</i>    | 0.932780898 |
| 16,464 | <i>ZNF79</i>     | 0.933940045 |
| 16,465 | <i>TLR7</i>      | 0.93449303  |
| 16,466 | <i>MSN</i>       | 0.934744285 |
| 16,467 | <i>BBOX1</i>     | 0.935000474 |
| 16,468 | <i>LOC285311</i> | 0.935053948 |
| 16,469 | <i>MK-STYX</i>   | 0.935179181 |
| 16,470 | <i>SLC41A2</i>   | 0.935333169 |
| 16,471 | <i>CACNG8</i>    | 0.935464767 |
| 16,472 | <i>GPR74</i>     | 0.936245077 |
| 16,473 | <i>HOXA9</i>     | 0.936689119 |
| 16,474 | <i>DEHAL1</i>    | 0.936831089 |
| 16,475 | <i>DLP</i>       | 0.937772393 |
| 16,476 | <i>SNRP70</i>    | 0.938575625 |
| 16,477 | <i>LRP5</i>      | 0.939646001 |
| 16,478 | <i>TRAF5</i>     | 0.940117564 |
| 16,479 | <i>EIF3S6IP</i>  | 0.941276298 |
| 16,480 | <i>C4ORF8</i>    | 0.94138354  |
| 16,481 | <i>OR2T2</i>     | 0.942071017 |
| 16,482 | <i>FIGF</i>      | 0.942171374 |
| 16,483 | <i>PDE1A</i>     | 0.942315773 |
| 16,484 | <i>DNCLI1</i>    | 0.943087505 |
| 16,485 | <i>AGT</i>       | 0.943693593 |

|        |                  |             |
|--------|------------------|-------------|
| 16,486 | <i>CTBS</i>      | 0.944015219 |
| 16,487 | <i>LEP</i>       | 0.944273074 |
| 16,488 | <i>STAM</i>      | 0.944471534 |
| 16,489 | <i>COX6B1</i>    | 0.944560029 |
| 16,490 | <i>TBL1X</i>     | 0.945233064 |
| 16,491 | <i>FUT7</i>      | 0.945777467 |
| 16,492 | <i>ZFYVE9</i>    | 0.946836853 |
| 16,493 | <i>HIST1H4G</i>  | 0.94702951  |
| 16,494 | <i>QSCN6L1</i>   | 0.947071162 |
| 16,495 | <i>LOC339231</i> | 0.94730794  |
| 16,496 | <i>HES2</i>      | 0.948985973 |
| 16,497 | <i>HES2</i>      | 0.948985973 |
| 16,498 | <i>APRIN</i>     | 0.949343309 |
| 16,499 | <i>LOC157378</i> | 0.95006233  |
| 16,500 | <i>ANAPC11</i>   | 0.953122967 |
| 16,501 | <i>DUSP12</i>    | 0.954255831 |
| 16,502 | <i>ZNF268</i>    | 0.954369803 |
| 16,503 | <i>EMID2</i>     | 0.954514217 |
| 16,504 | <i>LGP1</i>      | 0.954587458 |
| 16,505 | <i>AMIGO3</i>    | 0.954966702 |
| 16,506 | <i>HOXC4</i>     | 0.955462364 |
| 16,507 | <i>SMPD1</i>     | 0.955483848 |
| 16,508 | <i>TMEM48</i>    | 0.95564123  |
| 16,509 | <i>OR10J3</i>    | 0.956698979 |
| 16,510 | <i>MGC21518</i>  | 0.956828581 |
| 16,511 | <i>UBR2</i>      | 0.957344006 |
| 16,512 | <i>ACAT1</i>     | 0.95864289  |
| 16,513 | <i>TBC1D10C</i>  | 0.960403469 |
| 16,514 | <i>ACBD4</i>     | 0.961118122 |
| 16,515 | <i>OR51A7</i>    | 0.961168423 |
| 16,516 | <i>GPM6B</i>     | 0.961177526 |
| 16,517 | <i>UNKL</i>      | 0.961806634 |
| 16,518 | <i>APOA2</i>     | 0.962126973 |
| 16,519 | <i>SLC16A4</i>   | 0.962933984 |
| 16,520 | <i>C9ORF99</i>   | 0.963881448 |
| 16,521 | <i>TNFSF12</i>   | 0.963953018 |
| 16,522 | <i>MYPN</i>      | 0.964377097 |
| 16,523 | <i>DUSP10</i>    | 0.964730761 |
| 16,524 | <i>PQLC2</i>     | 0.965868477 |
| 16,525 | <i>PHF7</i>      | 0.966269034 |
| 16,526 | <i>BFSP1</i>     | 0.966342873 |
| 16,527 | <i>SNAPC2</i>    | 0.966565974 |
| 16,528 | <i>MID2</i>      | 0.966587777 |
| 16,529 | <i>NBS1</i>      | 0.96733866  |
| 16,530 | <i>PDE1B</i>     | 0.967552978 |
| 16,531 | <i>TMC3</i>      | 0.968111545 |
| 16,532 | <i>PFAAP5</i>    | 0.968419088 |



|        |                     |             |
|--------|---------------------|-------------|
| 16,533 | <i>DCD</i>          | 0.968519318 |
| 16,534 | <i>TNKS1BP1</i>     | 0.968672069 |
| 16,535 | <i>SART3</i>        | 0.968884271 |
| 16,536 | <i>FLJ25286</i>     | 0.969049817 |
| 16,537 | <i>UNG2</i>         | 0.96970833  |
| 16,538 | <i>DTX4</i>         | 0.970093948 |
| 16,539 | <i>SPARC</i>        | 0.97018046  |
| 16,540 | <i>FCGR2C</i>       | 0.970318326 |
| 16,541 | <i>LGR6</i>         | 0.970674173 |
| 16,542 | <i>GRP</i>          | 0.970735823 |
| 16,543 | <i>GSTM1</i>        | 0.970819975 |
| 16,544 | <i>MGC9084</i>      | 0.971191963 |
| 16,545 | <i>MAGEA4</i>       | 0.971343078 |
| 16,546 | <i>PTD015</i>       | 0.971535056 |
| 16,547 | <i>EPDR1</i>        | 0.972567732 |
| 16,548 | <i>KLHL21</i>       | 0.972641222 |
| 16,549 | <i>AIG1</i>         | 0.973295326 |
| 16,550 | <i>KIAA0377</i>     | 0.973387488 |
| 16,551 | <i>GRK5</i>         | 0.975306297 |
| 16,552 | <i>SPATA12</i>      | 0.975827114 |
| 16,553 | <i>LOC441581</i>    | 0.975873117 |
| 16,554 | <i>LOC56931</i>     | 0.976329935 |
| 16,555 | <i>SRD5A1</i>       | 0.97681899  |
| 16,556 | <i>ZCWCC2</i>       | 0.977122516 |
| 16,557 | <i>PXMP4</i>        | 0.977490916 |
| 16,558 | <i>LOC100127889</i> | 0.977591004 |
| 16,559 | <i>FMO4</i>         | 0.978110668 |
| 16,560 | <i>TACC2</i>        | 0.978161629 |
| 16,561 | <i>TAS2R40</i>      | 0.979123339 |
| 16,562 | <i>IFIT1L</i>       | 0.979198377 |
| 16,563 | <i>SLC25A23</i>     | 0.979382111 |
| 16,564 | <i>FLOT1</i>        | 0.979383394 |
| 16,565 | <i>RNF8</i>         | 0.979785003 |
| 16,566 | <i>RBMY1B</i>       | 0.980008994 |
| 16,567 | <i>ECE2</i>         | 0.981281128 |
| 16,568 | <i>INVS</i>         | 0.981351707 |
| 16,569 | <i>CENTD3</i>       | 0.981591263 |
| 16,570 | <i>MGC10233</i>     | 0.982669791 |
| 16,571 | <i>ACADS</i>        | 0.984264477 |
| 16,572 | <i>CHRM5</i>        | 0.984339595 |
| 16,573 | <i>MAP2</i>         | 0.98520591  |
| 16,574 | <i>TAF10</i>        | 0.985903593 |
| 16,575 | <i>SF3B2</i>        | 0.986379172 |
| 16,576 | <i>SF3B2</i>        | 0.986379172 |
| 16,577 | <i>ZNF573</i>       | 0.986432859 |
| 16,578 | <i>CES2</i>         | 0.986973881 |
| 16,579 | <i>hCG_1794298</i>  | 0.987217969 |

|        |                  |             |
|--------|------------------|-------------|
| 16,580 | <i>SNX16</i>     | 0.987402934 |
| 16,581 | <i>APBB3</i>     | 0.988437729 |
| 16,582 | <i>SNIP1</i>     | 0.988792478 |
| 16,583 | <i>MCF2L2</i>    | 0.989116206 |
| 16,584 | <i>MGC52057</i>  | 0.989275209 |
| 16,585 | <i>LRRC51</i>    | 0.989590924 |
| 16,586 | <i>VSIG1</i>     | 0.990114147 |
| 16,587 | <i>FLJ16030</i>  | 0.990979454 |
| 16,588 | <i>TCEA2</i>     | 0.991349257 |
| 16,589 | <i>TNIP2</i>     | 0.991825209 |
| 16,590 | <i>LAMB4</i>     | 0.991852956 |
| 16,591 | <i>URB</i>       | 0.992165458 |
| 16,592 | <i>FXR1</i>      | 0.992765494 |
| 16,593 | <i>TGIF2LX</i>   | 0.99287867  |
| 16,594 | <i>SIRPB1</i>    | 0.993277479 |
| 16,595 | <i>MIS12</i>     | 0.99352636  |
| 16,596 | <i>GCC1</i>      | 0.994280273 |
| 16,597 | <i>PDIA6</i>     | 0.994738017 |
| 16,598 | <i>MFHAS1</i>    | 0.994874676 |
| 16,599 | <i>SLC9A2</i>    | 0.994924838 |
| 16,600 | <i>GPR21</i>     | 0.995134704 |
| 16,601 | <i>CACNG6</i>    | 0.995682547 |
| 16,602 | <i>CACNA1B</i>   | 0.996967883 |
| 16,603 | <i>PKDREJ</i>    | 0.997648842 |
| 16,604 | <i>FCMD</i>      | 0.997952078 |
| 16,605 | <i>HTR3E</i>     | 0.998143904 |
| 16,606 | <i>C9ORF89</i>   | 0.998492281 |
| 16,607 | <i>FAM49B</i>    | 0.999476787 |
| 16,608 | <i>SCUBE3</i>    | 1.0000164   |
| 16,609 | <i>RUFY2</i>     | 1.000258833 |
| 16,610 | <i>HSPC135</i>   | 1.00069822  |
| 16,611 | <i>CREB3</i>     | 1.000987395 |
| 16,612 | <i>C8ORF4</i>    | 1.001551994 |
| 16,613 | <i>MBNL2</i>     | 1.001615499 |
| 16,614 | <i>GKN1</i>      | 1.001640906 |
| 16,615 | <i>C9ORF71</i>   | 1.002267346 |
| 16,616 | <i>LOC91431</i>  | 1.002354352 |
| 16,617 | <i>PKD1</i>      | 1.003569701 |
| 16,618 | <i>ABCA7</i>     | 1.004876415 |
| 16,619 | <i>FLJ35773</i>  | 1.005274954 |
| 16,620 | <i>NAT8L</i>     | 1.005806724 |
| 16,621 | <i>NUP88</i>     | 1.006090155 |
| 16,622 | <i>GABARAPL2</i> | 1.006720776 |
| 16,623 | <i>RAFTLIN</i>   | 1.007257435 |
| 16,624 | <i>C19ORF24</i>  | 1.009159964 |
| 16,625 | <i>TRIM29</i>    | 1.009341255 |
| 16,626 | <i>KCNT2</i>     | 1.009443501 |

|        |                  |             |
|--------|------------------|-------------|
| 16,627 | <i>AIP</i>       | 1.010951417 |
| 16,628 | <i>CHRM1</i>     | 1.011686621 |
| 16,629 | <i>ARF6</i>      | 1.012067404 |
| 16,630 | <i>CDH22</i>     | 1.012456514 |
| 16,631 | <i>FSD1</i>      | 1.012902476 |
| 16,632 | <i>HIG1</i>      | 1.013098019 |
| 16,633 | <i>GATA2</i>     | 1.013253855 |
| 16,634 | <i>FLJ45530</i>  | 1.013358741 |
| 16,635 | <i>NPAS2</i>     | 1.013754112 |
| 16,636 | <i>PLD2</i>      | 1.013864244 |
| 16,637 | <i>GPX6</i>      | 1.01462629  |
| 16,638 | <i>MIZF</i>      | 1.014997903 |
| 16,639 | <i>USP30</i>     | 1.015179516 |
| 16,640 | <i>MARCH4</i>    | 1.015355437 |
| 16,641 | <i>GTPBP3</i>    | 1.015624336 |
| 16,642 | <i>ZNF548</i>    | 1.015721749 |
| 16,643 | <i>DPAGT1</i>    | 1.015773411 |
| 16,644 | <i>LCN9</i>      | 1.016405271 |
| 16,645 | <i>OR13F1</i>    | 1.016690262 |
| 16,646 | <i>MGC34032</i>  | 1.016698975 |
| 16,647 | <i>GALNT1</i>    | 1.016917281 |
| 16,648 | <i>PARP10</i>    | 1.017991919 |
| 16,649 | <i>SOAT1</i>     | 1.019159731 |
| 16,650 | <i>VTCN1</i>     | 1.019369152 |
| 16,651 | <i>SFRS2IP</i>   | 1.019425266 |
| 16,652 | <i>OR52E2</i>    | 1.020140777 |
| 16,653 | <i>EZH1</i>      | 1.020440852 |
| 16,654 | <i>C14ORF2</i>   | 1.020567239 |
| 16,655 | <i>C14ORF2</i>   | 1.020567239 |
| 16,656 | <i>FGF18</i>     | 1.021269927 |
| 16,657 | <i>KIAA1608</i>  | 1.021770316 |
| 16,658 | <i>OTOG</i>      | 1.022816162 |
| 16,659 | <i>AMY2B</i>     | 1.023041106 |
| 16,660 | <i>DHX16</i>     | 1.023415498 |
| 16,661 | <i>RNF168</i>    | 1.023835848 |
| 16,662 | <i>OSTN</i>      | 1.024198981 |
| 16,663 | <i>SCGF</i>      | 1.024326087 |
| 16,664 | <i>DOK1</i>      | 1.024349928 |
| 16,665 | <i>LGALS14</i>   | 1.024675385 |
| 16,666 | <i>GRID1</i>     | 1.025176969 |
| 16,667 | <i>CDC2</i>      | 1.026316407 |
| 16,668 | <i>CIDE-3</i>    | 1.026853605 |
| 16,669 | <i>SUHW2</i>     | 1.027138217 |
| 16,670 | <i>ASPM</i>      | 1.029775069 |
| 16,671 | <i>SMARCA4</i>   | 1.030158349 |
| 16,672 | <i>KDELR3</i>    | 1.030382694 |
| 16,673 | <i>PROSAPIP2</i> | 1.0306708   |

|        |                  |             |
|--------|------------------|-------------|
| 16,674 | <i>TMEM10</i>    | 1.030961474 |
| 16,675 | <i>FLJ22173</i>  | 1.032332803 |
| 16,676 | <i>MYH7</i>      | 1.032741044 |
| 16,677 | <i>CT47.8</i>    | 1.032789271 |
| 16,678 | <i>FGF12</i>     | 1.03340935  |
| 16,679 | <i>ZNF385</i>    | 1.033691716 |
| 16,680 | <i>SPATA7</i>    | 1.034011674 |
| 16,681 | <i>SESN3</i>     | 1.034682933 |
| 16,682 | <i>DNCL2</i>     | 1.035740133 |
| 16,683 | <i>EXO1</i>      | 1.035907261 |
| 16,684 | <i>ASCL2</i>     | 1.036853594 |
| 16,685 | <i>PPP2R2D</i>   | 1.037382854 |
| 16,686 | <i>WDR6</i>      | 1.037511303 |
| 16,687 | <i>CCDC152</i>   | 1.03759504  |
| 16,688 | <i>FBXW11</i>    | 1.038070916 |
| 16,689 | <i>SLC22A5</i>   | 1.038258772 |
| 16,690 | <i>CACNG7</i>    | 1.039508015 |
| 16,691 | <i>IFNAR2</i>    | 1.040337747 |
| 16,692 | <i>JAM2</i>      | 1.040806634 |
| 16,693 | <i>UBOX5</i>     | 1.041040766 |
| 16,694 | <i>F2</i>        | 1.041216613 |
| 16,695 | <i>FGL1</i>      | 1.042264363 |
| 16,696 | <i>ABCE1</i>     | 1.04274792  |
| 16,697 | <i>LOC283219</i> | 1.043149821 |
| 16,698 | <i>KIF1C</i>     | 1.044941802 |
| 16,699 | <i>RHOG</i>      | 1.045222598 |
| 16,700 | <i>D2HGDH</i>    | 1.045395683 |
| 16,701 | <i>IL13RA1</i>   | 1.046761842 |
| 16,702 | <i>LOC401827</i> | 1.047180292 |
| 16,703 | <i>RDH12</i>     | 1.04754996  |
| 16,704 | <i>C2GNT3</i>    | 1.04770814  |
| 16,705 | <i>GLB1</i>      | 1.047907853 |
| 16,706 | <i>HS3ST4</i>    | 1.048623872 |
| 16,707 | <i>LOC348094</i> | 1.048704627 |
| 16,708 | <i>LOC652433</i> | 1.048787067 |
| 16,709 | <i>PTGES2</i>    | 1.04935635  |
| 16,710 | <i>CLDN12</i>    | 1.050557765 |
| 16,711 | <i>FMNL1</i>     | 1.050971522 |
| 16,712 | <i>VCX-C</i>     | 1.051235827 |
| 16,713 | <i>ACTL7A</i>    | 1.051630475 |
| 16,714 | <i>SRC</i>       | 1.051803352 |
| 16,715 | <i>AKNA</i>      | 1.052421872 |
| 16,716 | <i>MTERF</i>     | 1.052637337 |
| 16,717 | <i>PIGB</i>      | 1.053002228 |
| 16,718 | <i>BTC</i>       | 1.053224933 |
| 16,719 | <i>GTF3C1</i>    | 1.053375268 |
| 16,720 | <i>GPX3</i>      | 1.055970442 |

|        |               |             |
|--------|---------------|-------------|
| 16,721 | HGS           | 1.057636049 |
| 16,722 | TCEB1         | 1.05831745  |
| 16,723 | PIGA          | 1.058321418 |
| 16,724 | FLJ20054      | 1.058704578 |
| 16,725 | LOC400258     | 1.058761721 |
| 16,726 | LOC400258     | 1.058761721 |
| 16,727 | ENTH          | 1.058829497 |
| 16,728 | EXOC8         | 1.058875401 |
| 16,729 | LOC100128731  | 1.059637738 |
| 16,730 | NAP1L1        | 1.059723949 |
| 16,731 | DKFZP586H2123 | 1.060066142 |
| 16,732 | TMPRSS7       | 1.060137365 |
| 16,733 | ACOT1         | 1.060355062 |
| 16,734 | B4GALT7       | 1.060889725 |
| 16,735 | AGC1          | 1.062656959 |
| 16,736 | HSF2          | 1.062839231 |
| 16,737 | OR10G3        | 1.06307704  |
| 16,738 | TGFB1I1       | 1.063667075 |
| 16,739 | ELA3B         | 1.063992627 |
| 16,740 | ATP6V1H       | 1.066535208 |
| 16,741 | IMAGE:4907098 | 1.066721307 |
| 16,742 | SELPLG        | 1.067123491 |
| 16,743 | CXorf39       | 1.068530423 |
| 16,744 | TCFL5         | 1.069428507 |
| 16,745 | VIL2          | 1.070299036 |
| 16,746 | GLI           | 1.070598464 |
| 16,747 | PALMD         | 1.070822247 |
| 16,748 | INHBA         | 1.072531835 |
| 16,749 | PEMT          | 1.072696688 |
| 16,750 | FLJ11200      | 1.073076697 |
| 16,751 | PCCA          | 1.073386396 |
| 16,752 | CCL5          | 1.073746318 |
| 16,753 | SNX17         | 1.074095478 |
| 16,754 | CLDN20        | 1.074520284 |
| 16,755 | CLDN20        | 1.074520284 |
| 16,756 | NFE2L1        | 1.075236035 |
| 16,757 | LOX           | 1.075941787 |
| 16,758 | ZNF256        | 1.076439065 |
| 16,759 | CDO1          | 1.07723224  |
| 16,760 | HIST1H1B      | 1.077578728 |
| 16,761 | ARL3          | 1.078242892 |
| 16,762 | TUBB6         | 1.080334643 |
| 16,763 | DXS9928E      | 1.080825425 |
| 16,764 | ARCH          | 1.081194417 |
| 16,765 | LOC147166     | 1.081615159 |
| 16,766 | EIF5          | 1.082062922 |
| 16,767 | CAPG          | 1.082701425 |

|        |                  |             |
|--------|------------------|-------------|
| 16,768 | <i>FLJ37543</i>  | 1.083191515 |
| 16,769 | <i>OLIG3</i>     | 1.083976155 |
| 16,770 | <i>TXNDC6</i>    | 1.085118306 |
| 16,771 | <i>ZNF546</i>    | 1.085206336 |
| 16,772 | <i>PTAFR</i>     | 1.086267538 |
| 16,773 | <i>NDUFA1</i>    | 1.089416731 |
| 16,774 | <i>KRTHA8</i>    | 1.089917586 |
| 16,775 | <i>FLJ20989</i>  | 1.091730353 |
| 16,776 | <i>RAB22A</i>    | 1.091828147 |
| 16,777 | <i>JMJD1C</i>    | 1.092497767 |
| 16,778 | <i>RXRA</i>      | 1.094419342 |
| 16,779 | <i>CSNK1G2</i>   | 1.094553616 |
| 16,780 | <i>ZNF579</i>    | 1.09488797  |
| 16,781 | <i>ZSIG11</i>    | 1.095795563 |
| 16,782 | <i>NTSR2</i>     | 1.096229427 |
| 16,783 | <i>TRIM75</i>    | 1.0975911   |
| 16,784 | <i>MAPK8IP3</i>  | 1.098279253 |
| 16,785 | <i>TCF12</i>     | 1.099275125 |
| 16,786 | <i>CREB3L1</i>   | 1.099612013 |
| 16,787 | <i>DICER1</i>    | 1.100105943 |
| 16,788 | <i>SLC9A1</i>    | 1.100211379 |
| 16,789 | <i>MGC40579</i>  | 1.10055496  |
| 16,790 | <i>MGC33190</i>  | 1.100707251 |
| 16,791 | <i>SHBG</i>      | 1.100732522 |
| 16,792 | <i>PRODH</i>     | 1.10096706  |
| 16,793 | <i>FOXA1</i>     | 1.101383691 |
| 16,794 | <i>MYOCD</i>     | 1.101489328 |
| 16,795 | <i>CNR1</i>      | 1.103474595 |
| 16,796 | <i>PNMA1</i>     | 1.10384133  |
| 16,797 | <i>GLTSCR2</i>   | 1.104016837 |
| 16,798 | <i>ANP32D</i>    | 1.10417433  |
| 16,799 | <i>UPF2</i>      | 1.104412516 |
| 16,800 | <i>SGSH</i>      | 1.104424977 |
| 16,801 | <i>LOC125704</i> | 1.105046596 |
| 16,802 | <i>TALDO1</i>    | 1.105612974 |
| 16,803 | <i>GOT2</i>      | 1.105787459 |
| 16,804 | <i>ZXDA</i>      | 1.106230059 |
| 16,805 | <i>C6ORF75</i>   | 1.107018776 |
| 16,806 | <i>ALDH2</i>     | 1.10762694  |
| 16,807 | <i>PYCR1</i>     | 1.107820052 |
| 16,808 | <i>SOX9</i>      | 1.108370002 |
| 16,809 | <i>LOC644997</i> | 1.109023881 |
| 16,810 | <i>ANKRD3</i>    | 1.109361718 |
| 16,811 | <i>GNAO1</i>     | 1.110567226 |
| 16,812 | <i>MGC34805</i>  | 1.110766233 |
| 16,813 | <i>MGC4767</i>   | 1.111029364 |
| 16,814 | <i>CD79A</i>     | 1.112910525 |

|        |                     |             |
|--------|---------------------|-------------|
| 16,815 | <i>RANGNRF</i>      | 1.113108624 |
| 16,816 | <i>HELIC1</i>       | 1.113736223 |
| 16,817 | <i>TNFAIP6</i>      | 1.115203731 |
| 16,818 | <i>TIAM1</i>        | 1.116378663 |
| 16,819 | <i>SOX6</i>         | 1.116833616 |
| 16,820 | <i>MGC10646</i>     | 1.116903253 |
| 16,821 | <i>PLS3</i>         | 1.117209059 |
| 16,822 | <i>LOC54103</i>     | 1.117886619 |
| 16,823 | <i>PHF16</i>        | 1.118309674 |
| 16,824 | <i>LOC113251</i>    | 1.118533757 |
| 16,825 | <i>LOC51059</i>     | 1.118776144 |
| 16,826 | <i>CENTG2</i>       | 1.119514099 |
| 16,827 | <i>SLC15A4</i>      | 1.121157624 |
| 16,828 | <i>KLRB1</i>        | 1.121296289 |
| 16,829 | <i>CRHR2</i>        | 1.121575805 |
| 16,830 | <i>ITR</i>          | 1.121722422 |
| 16,831 | <i>CTDSP2</i>       | 1.121741995 |
| 16,832 | <i>KIAA0913</i>     | 1.122763234 |
| 16,833 | <i>LRFN2</i>        | 1.123288174 |
| 16,834 | <i>SCGB1D2</i>      | 1.123473977 |
| 16,835 | <i>LOC57146</i>     | 1.123614714 |
| 16,836 | <i>DKFZP761P211</i> | 1.126745738 |
| 16,837 | <i>PPP1R7</i>       | 1.127077422 |
| 16,838 | <i>ABHD3</i>        | 1.127237643 |
| 16,839 | <i>COX7B2</i>       | 1.127814372 |
| 16,840 | <i>OTOS</i>         | 1.128123702 |
| 16,841 | <i>MTMR4</i>        | 1.129441934 |
| 16,842 | <i>EVI5</i>         | 1.131772692 |
| 16,843 | <i>FLJ10803</i>     | 1.131942778 |
| 16,844 | <i>TNN</i>          | 1.132699031 |
| 16,845 | <i>RAB27B</i>       | 1.133021166 |
| 16,846 | <i>SLC27A1</i>      | 1.133584726 |
| 16,847 | <i>POLR1C</i>       | 1.133889019 |
| 16,848 | <i>ONECUT1</i>      | 1.134470049 |
| 16,849 | <i>CLN8</i>         | 1.134669288 |
| 16,850 | <i>OR1N1</i>        | 1.135086996 |
| 16,851 | <i>AIM1</i>         | 1.135117853 |
| 16,852 | <i>OR8B4</i>        | 1.135289104 |
| 16,853 | <i>NLK</i>          | 1.135343733 |
| 16,854 | <i>FLJ21415</i>     | 1.135499933 |
| 16,855 | <i>KIAA0153</i>     | 1.137475045 |
| 16,856 | <i>RUSC2</i>        | 1.137684452 |
| 16,857 | <i>LOC653121</i>    | 1.138197144 |
| 16,858 | <i>AKR7A3</i>       | 1.140505367 |
| 16,859 | <i>BANP</i>         | 1.141410519 |
| 16,860 | <i>LACTB</i>        | 1.141925218 |
| 16,861 | <i>C13ORF11</i>     | 1.142040081 |

|        |                     |             |
|--------|---------------------|-------------|
| 16,862 | <i>PCYT1B</i>       | 1.1422142   |
| 16,863 | <i>NFAT5</i>        | 1.144664561 |
| 16,864 | <i>PRKAA2</i>       | 1.145002568 |
| 16,865 | <i>TCTA</i>         | 1.145823253 |
| 16,866 | <i>LOC201181</i>    | 1.145956083 |
| 16,867 | <i>S100A4</i>       | 1.146578839 |
| 16,868 | <i>KCTD5</i>        | 1.147215901 |
| 16,869 | <i>TMEM25</i>       | 1.147401541 |
| 16,870 | <i>C9ORF10</i>      | 1.148487489 |
| 16,871 | <i>LOC389766</i>    | 1.149477718 |
| 16,872 | <i>SHC2</i>         | 1.149846023 |
| 16,873 | <i>LOC55871</i>     | 1.150094007 |
| 16,874 | <i>PTE2B</i>        | 1.150169352 |
| 16,875 | <i>MAML3</i>        | 1.15122342  |
| 16,876 | <i>RFFL</i>         | 1.151555595 |
| 16,877 | <i>CETP</i>         | 1.152685146 |
| 16,878 | <i>INPP5A</i>       | 1.154495588 |
| 16,879 | <i>FBXO8</i>        | 1.154558463 |
| 16,880 | <i>LOC100129550</i> | 1.155656682 |
| 16,881 | <i>SCAMP3</i>       | 1.156462272 |
| 16,882 | <i>CRYBB2</i>       | 1.159159055 |
| 16,883 | <i>MGC33486</i>     | 1.160230072 |
| 16,884 | <i>CRISP2</i>       | 1.161453838 |
| 16,885 | <i>FIGN</i>         | 1.161732827 |
| 16,886 | <i>POLR3A</i>       | 1.162423248 |
| 16,887 | <i>GTF2IRD1</i>     | 1.162435554 |
| 16,888 | <i>STRA13</i>       | 1.16370889  |
| 16,889 | <i>SSH3</i>         | 1.163832584 |
| 16,890 | <i>GAP43</i>        | 1.164645087 |
| 16,891 | <i>MGC10471</i>     | 1.16467368  |
| 16,892 | <i>B4GALT1</i>      | 1.16486036  |
| 16,893 | <i>BLVRA</i>        | 1.16593097  |
| 16,894 | <i>E2F6</i>         | 1.166289477 |
| 16,895 | <i>MGC50104</i>     | 1.166350267 |
| 16,896 | <i>ACTL6</i>        | 1.166776919 |
| 16,897 | <i>UBE2D2</i>       | 1.167261948 |
| 16,898 | <i>NALP12</i>       | 1.168502717 |
| 16,899 | <i>FUSSEL18</i>     | 1.170575389 |
| 16,900 | <i>FYB</i>          | 1.170757498 |
| 16,901 | <i>MYO1C</i>        | 1.171289738 |
| 16,902 | <i>DDR1</i>         | 1.171423327 |
| 16,903 | <i>C9ORF75</i>      | 1.171763381 |
| 16,904 | <i>RG9MTD3</i>      | 1.173485476 |
| 16,905 | <i>EEF1A1</i>       | 1.173969756 |
| 16,906 | <i>KLRC3</i>        | 1.174832666 |
| 16,907 | <i>CYP26C1</i>      | 1.17508433  |
| 16,908 | <i>FLJ12610</i>     | 1.175185184 |



|        |                     |             |
|--------|---------------------|-------------|
| 16,909 | <i>HRNR</i>         | 1.176073956 |
| 16,910 | <i>APOL1</i>        | 1.176136702 |
| 16,911 | <i>SYT2</i>         | 1.176621298 |
| 16,912 | <i>MAPT</i>         | 1.177863971 |
| 16,913 | <i>PCBD2</i>        | 1.17790469  |
| 16,914 | <i>AF5Q31</i>       | 1.177910758 |
| 16,915 | <i>MCART2</i>       | 1.179005146 |
| 16,916 | <i>GAS1</i>         | 1.180972851 |
| 16,917 | <i>ITPR3</i>        | 1.182311924 |
| 16,918 | <i>GALNT3</i>       | 1.182313136 |
| 16,919 | <i>EPB41L1</i>      | 1.183080696 |
| 16,920 | <i>FLJ22374</i>     | 1.183860521 |
| 16,921 | <i>LOC100134934</i> | 1.184862533 |
| 16,922 | <i>GNA11</i>        | 1.186399911 |
| 16,923 | <i>IGFBP1</i>       | 1.186407728 |
| 16,924 | <i>MYO9B</i>        | 1.187065648 |
| 16,925 | <i>PTGER1</i>       | 1.188100179 |
| 16,926 | <i>C20ORF27</i>     | 1.188186408 |
| 16,927 | <i>G6PC3</i>        | 1.188389559 |
| 16,928 | <i>DUSP2</i>        | 1.189813116 |
| 16,929 | <i>RHOBTB3</i>      | 1.189849632 |
| 16,930 | <i>RNF10</i>        | 1.190825358 |
| 16,931 | <i>SLC29A1</i>      | 1.191187455 |
| 16,932 | <i>HNRPCL1</i>      | 1.191900582 |
| 16,933 | <i>MGC33414</i>     | 1.192402309 |
| 16,934 | <i>ZNF121</i>       | 1.19252732  |
| 16,935 | <i>SB145</i>        | 1.193130365 |
| 16,936 | <i>SUCLG1</i>       | 1.193723024 |
| 16,937 | <i>FLJ12505</i>     | 1.193932937 |
| 16,938 | <i>FLJ20232</i>     | 1.194875565 |
| 16,939 | <i>ZNF599</i>       | 1.195484397 |
| 16,940 | <i>HSPB3</i>        | 1.196299844 |
| 16,941 | <i>OR1J2</i>        | 1.196575841 |
| 16,942 | <i>SBB154</i>       | 1.196695589 |
| 16,943 | <i>CCND3</i>        | 1.197054013 |
| 16,944 | <i>LOC143903</i>    | 1.198157924 |
| 16,945 | <i>IER5</i>         | 1.198884354 |
| 16,946 | <i>BCL7C</i>        | 1.199726887 |
| 16,947 | <i>POLR2A</i>       | 1.201146727 |
| 16,948 | <i>KIAA0562</i>     | 1.20227532  |
| 16,949 | <i>DOC2A</i>        | 1.202479584 |
| 16,950 | <i>CD244</i>        | 1.20365895  |
| 16,951 | <i>LENG8</i>        | 1.203956179 |
| 16,952 | <i>SLC35F1</i>      | 1.204368629 |
| 16,953 | <i>RBMS1</i>        | 1.20501182  |
| 16,954 | <i>MGC15882</i>     | 1.205351196 |
| 16,955 | <i>SSBP2</i>        | 1.205985574 |

|        |                  |             |
|--------|------------------|-------------|
| 16,956 | <i>LETM1</i>     | 1.205987013 |
| 16,957 | <i>ERAL1</i>     | 1.206288573 |
| 16,958 | <i>BCAR1</i>     | 1.207430448 |
| 16,959 | <i>WDR12</i>     | 1.207490996 |
| 16,960 | <i>CIB2</i>      | 1.207812482 |
| 16,961 | <i>CTNNAL1</i>   | 1.208435073 |
| 16,962 | <i>KRTAP12-2</i> | 1.20937923  |
| 16,963 | <i>LBX1</i>      | 1.209717725 |
| 16,964 | <i>LOC152138</i> | 1.21000205  |
| 16,965 | <i>PTRH2</i>     | 1.210207893 |
| 16,966 | <i>STK32C</i>    | 1.21198961  |
| 16,967 | <i>ZNF146</i>    | 1.212449814 |
| 16,968 | <i>CYLN2</i>     | 1.214376804 |
| 16,969 | <i>LOC90355</i>  | 1.214975754 |
| 16,970 | <i>WBP11</i>     | 1.21570479  |
| 16,971 | <i>FLJ33641</i>  | 1.215807589 |
| 16,972 | <i>MYEOV</i>     | 1.216831255 |
| 16,973 | <i>YWHAG</i>     | 1.216843392 |
| 16,974 | <i>HEY2</i>      | 1.218089864 |
| 16,975 | <i>ALPPL2</i>    | 1.218252208 |
| 16,976 | <i>ELF1</i>      | 1.218699597 |
| 16,977 | <i>PLA2R1</i>    | 1.219852128 |
| 16,978 | <i>DNM1</i>      | 1.220568033 |
| 16,979 | <i>P101-PI3K</i> | 1.22063945  |
| 16,980 | <i>KRTAP9-3</i>  | 1.222270379 |
| 16,981 | <i>KCNA5</i>     | 1.222386117 |
| 16,982 | <i>GPAA1</i>     | 1.222516647 |
| 16,983 | <i>HEXA</i>      | 1.223802198 |
| 16,984 | <i>RBMY1J</i>    | 1.224131485 |
| 16,985 | <i>TBC1D2</i>    | 1.224554958 |
| 16,986 | <i>RGPD1</i>     | 1.225530741 |
| 16,987 | <i>FOXN1</i>     | 1.225728899 |
| 16,988 | <i>BAG4</i>      | 1.227033153 |
| 16,989 | <i>PILRB</i>     | 1.227794544 |
| 16,990 | <i>F2RL1</i>     | 1.228423896 |
| 16,991 | <i>IL17D</i>     | 1.230160609 |
| 16,992 | <i>GPR158L1</i>  | 1.231480112 |
| 16,993 | <i>CLEC7A</i>    | 1.231833985 |
| 16,994 | <i>NAGS</i>      | 1.233352951 |
| 16,995 | <i>MGLL</i>      | 1.233599924 |
| 16,996 | <i>FLJ34389</i>  | 1.233936504 |
| 16,997 | <i>LTBR</i>      | 1.234957952 |
| 16,998 | <i>TENS1</i>     | 1.235119815 |
| 16,999 | <i>TWISTNB</i>   | 1.23568678  |
| 17,000 | <i>ZCWCC1</i>    | 1.236163318 |
| 17,001 | <i>HMGB2</i>     | 1.236485469 |
| 17,002 | <i>ALS2CR15</i>  | 1.237715426 |

|        |                  |             |
|--------|------------------|-------------|
| 17,003 | <i>DST</i>       | 1.238545457 |
| 17,004 | <i>LHPP</i>      | 1.239365617 |
| 17,005 | <i>CT45-4</i>    | 1.239627267 |
| 17,006 | <i>MMP27</i>     | 1.241134226 |
| 17,007 | <i>LOC128954</i> | 1.241859358 |
| 17,008 | <i>KIAA1023</i>  | 1.243988031 |
| 17,009 | <i>RAD54L</i>    | 1.244117684 |
| 17,010 | <i>ARMCX2</i>    | 1.244553516 |
| 17,011 | <i>P66ALPHA</i>  | 1.245086575 |
| 17,012 | <i>CLGN</i>      | 1.245218141 |
| 17,013 | <i>POLR2H</i>    | 1.245248128 |
| 17,014 | <i>CHD2</i>      | 1.245538576 |
| 17,015 | <i>ALDH7A1</i>   | 1.245749857 |
| 17,016 | <i>CAB45</i>     | 1.247522569 |
| 17,017 | <i>STYX</i>      | 1.248057327 |
| 17,018 | <i>ERBB4</i>     | 1.249854993 |
| 17,019 | <i>UPP1</i>      | 1.250086418 |
| 17,020 | <i>OGDHL</i>     | 1.250154429 |
| 17,021 | <i>LOC159091</i> | 1.250619313 |
| 17,022 | <i>LOC149469</i> | 1.253378535 |
| 17,023 | <i>PPP5C</i>     | 1.254238428 |
| 17,024 | <i>EVL</i>       | 1.256140441 |
| 17,025 | <i>PPM2C</i>     | 1.256461522 |
| 17,026 | <i>HOXC11</i>    | 1.25677474  |
| 17,027 | <i>SYT4</i>      | 1.258436633 |
| 17,028 | <i>LOC390688</i> | 1.25904274  |
| 17,029 | <i>TMEM16A</i>   | 1.25904274  |
| 17,030 | <i>TBN</i>       | 1.259872171 |
| 17,031 | <i>CKLFSF3</i>   | 1.259955221 |
| 17,032 | <i>CRNN</i>      | 1.260893787 |
| 17,033 | <i>KCNH1</i>     | 1.263039551 |
| 17,034 | <i>SUPT5H</i>    | 1.263256174 |
| 17,035 | <i>ATP6VOE</i>   | 1.264734734 |
| 17,036 | <i>SLC32A1</i>   | 1.264813711 |
| 17,037 | <i>FLJ14966</i>  | 1.265050187 |
| 17,038 | <i>PPP1R2</i>    | 1.265650313 |
| 17,039 | <i>QDPR</i>      | 1.266236688 |
| 17,040 | <i>NEUROG1</i>   | 1.267299075 |
| 17,041 | <i>SLC7A10</i>   | 1.267553508 |
| 17,042 | <i>LOC646174</i> | 1.267990049 |
| 17,043 | <i>DIO2</i>      | 1.271649026 |
| 17,044 | <i>PNMA2</i>     | 1.272384322 |
| 17,045 | <i>DUSP15</i>    | 1.272912422 |
| 17,046 | <i>YPEL1</i>     | 1.273234423 |
| 17,047 | <i>CLCN6</i>     | 1.274022901 |
| 17,048 | <i>SLA2</i>      | 1.275108012 |
| 17,049 | <i>MPPE1</i>     | 1.278377965 |

|        |                  |             |
|--------|------------------|-------------|
| 17,050 | <i>PIK3CD</i>    | 1.278670232 |
| 17,051 | <i>BTF3</i>      | 1.278770274 |
| 17,052 | <i>ZNF165</i>    | 1.278942616 |
| 17,053 | <i>TBR1</i>      | 1.279938183 |
| 17,054 | <i>UNQ9372</i>   | 1.280764902 |
| 17,055 | <i>MBIP</i>      | 1.280981089 |
| 17,056 | <i>K6IRS4</i>    | 1.281808572 |
| 17,057 | <i>AMPD2</i>     | 1.28200533  |
| 17,058 | <i>CA14</i>      | 1.282936796 |
| 17,059 | <i>PCDHA5</i>    | 1.284392847 |
| 17,060 | <i>KIAA2022</i>  | 1.286126698 |
| 17,061 | <i>LOC126669</i> | 1.287902281 |
| 17,062 | <i>FXR2</i>      | 1.288949595 |
| 17,063 | <i>RODH-4</i>    | 1.289303365 |
| 17,064 | <i>FLJ32332</i>  | 1.290575811 |
| 17,065 | <i>FLJ23548</i>  | 1.290637418 |
| 17,066 | <i>VHL</i>       | 1.291325942 |
| 17,067 | <i>GDF5</i>      | 1.29266187  |
| 17,068 | <i>GNGT2</i>     | 1.292880365 |
| 17,069 | <i>OR4K5</i>     | 1.29463227  |
| 17,070 | <i>ASAH2</i>     | 1.294785104 |
| 17,071 | <i>ENTPD6</i>    | 1.294963572 |
| 17,072 | <i>MARCH1</i>    | 1.2953573   |
| 17,073 | <i>PLA2G10</i>   | 1.295915494 |
| 17,074 | <i>MRC1L1</i>    | 1.296249655 |
| 17,075 | <i>KIAA1093</i>  | 1.298219399 |
| 17,076 | <i>NR2C1</i>     | 1.29924453  |
| 17,077 | <i>DYSFIP1</i>   | 1.301104502 |
| 17,078 | <i>PRDM4</i>     | 1.301475529 |
| 17,079 | <i>XYLT1</i>     | 1.301641318 |
| 17,080 | <i>PRKCH</i>     | 1.302089833 |
| 17,081 | <i>RNASE8</i>    | 1.304032005 |
| 17,082 | <i>ABHD9</i>     | 1.304076399 |
| 17,083 | <i>FLJ32416</i>  | 1.306265428 |
| 17,084 | <i>PATE</i>      | 1.30660053  |
| 17,085 | <i>GPR115</i>    | 1.307888817 |
| 17,086 | <i>STAT2</i>     | 1.308080065 |
| 17,087 | <i>PGS1</i>      | 1.309456585 |
| 17,088 | <i>NSFL1C</i>    | 1.31150366  |
| 17,089 | <i>ASAH3L</i>    | 1.312089613 |
| 17,090 | <i>MUC2</i>      | 1.312538172 |
| 17,091 | <i>CD28</i>      | 1.313471009 |
| 17,092 | <i>PRR5</i>      | 1.313776158 |
| 17,093 | <i>OR2L8</i>     | 1.314103852 |
| 17,094 | <i>OR2L8</i>     | 1.314103852 |
| 17,095 | <i>IFNA14</i>    | 1.315397718 |
| 17,096 | <i>SOX7</i>      | 1.315621764 |

|        |           |             |
|--------|-----------|-------------|
| 17,097 | TRIM69    | 1.316164589 |
| 17,098 | FCGR2A    | 1.317094794 |
| 17,099 | C9ORF7    | 1.317623276 |
| 17,100 | HCA112    | 1.317693308 |
| 17,101 | CAPZB     | 1.317769202 |
| 17,102 | C14ORF115 | 1.31857863  |
| 17,103 | FLJ12847  | 1.319067786 |
| 17,104 | TSSC4     | 1.319871668 |
| 17,105 | RAB34     | 1.32024702  |
| 17,106 | RAB34     | 1.32024702  |
| 17,107 | SUMO4     | 1.320375179 |
| 17,108 | DUSP4     | 1.32246041  |
| 17,109 | EFNA2     | 1.322857134 |
| 17,110 | CYP46A1   | 1.323101271 |
| 17,111 | WDR24     | 1.3235798   |
| 17,112 | FGF1      | 1.323942774 |
| 17,113 | RGS1      | 1.324044682 |
| 17,114 | RNPC2     | 1.324354659 |
| 17,115 | BFAR      | 1.324535259 |
| 17,116 | IGLL1     | 1.32550809  |
| 17,117 | EIF5B     | 1.326880773 |
| 17,118 | TPD52L1   | 1.327469264 |
| 17,119 | EMD       | 1.32764659  |
| 17,120 | RNF19     | 1.328497698 |
| 17,121 | TMEM17    | 1.328686335 |
| 17,122 | SYNE1     | 1.329219913 |
| 17,123 | DEFB108   | 1.329248726 |
| 17,124 | MMP20     | 1.330527083 |
| 17,125 | FAM13A1   | 1.331292639 |
| 17,126 | RIS1      | 1.33267309  |
| 17,127 | OPN1MW2   | 1.333211179 |
| 17,128 | PRY       | 1.333213778 |
| 17,129 | HIVEP2    | 1.333308953 |
| 17,130 | LOC388581 | 1.334350497 |
| 17,131 | PLCE1     | 1.334500705 |
| 17,132 | LOC122618 | 1.335114224 |
| 17,133 | MGC17624  | 1.33664051  |
| 17,134 | CEBPE     | 1.337683737 |
| 17,135 | RFNG      | 1.338271218 |
| 17,136 | SPA17     | 1.339425296 |
| 17,137 | AKAP10    | 1.341459558 |
| 17,138 | TKT       | 1.344377963 |
| 17,139 | KIAA1609  | 1.345276723 |
| 17,140 | KCNB1     | 1.34541468  |
| 17,141 | RAB31     | 1.345544049 |
| 17,142 | C13ORF9   | 1.346992427 |
| 17,143 | ELF4      | 1.347286501 |

|        |                  |             |
|--------|------------------|-------------|
| 17,144 | <i>MTSS1</i>     | 1.348182143 |
| 17,145 | <i>QP-C</i>      | 1.348293427 |
| 17,146 | <i>MGC21688</i>  | 1.349601582 |
| 17,147 | <i>SOX4</i>      | 1.349641329 |
| 17,148 | <i>GRM7</i>      | 1.35044207  |
| 17,149 | <i>SHC1</i>      | 1.352099918 |
| 17,150 | <i>RNF103</i>    | 1.35213932  |
| 17,151 | <i>TMEM103</i>   | 1.35282277  |
| 17,152 | <i>LENG4</i>     | 1.353516051 |
| 17,153 | <i>LOC56901</i>  | 1.353573449 |
| 17,154 | <i>RCL1</i>      | 1.353759205 |
| 17,155 | <i>FLJ23550</i>  | 1.354348635 |
| 17,156 | <i>C18ORF11</i>  | 1.354509504 |
| 17,157 | <i>TXNL1</i>     | 1.356662781 |
| 17,158 | <i>CLDN6</i>     | 1.357297485 |
| 17,159 | <i>C11ORF13</i>  | 1.359174801 |
| 17,160 | <i>PFKFB2</i>    | 1.361539789 |
| 17,161 | <i>LSECTIN</i>   | 1.361758408 |
| 17,162 | <i>PI4KII</i>    | 1.361807844 |
| 17,163 | <i>NIPA2</i>     | 1.362715456 |
| 17,164 | <i>SCD5</i>      | 1.363013289 |
| 17,165 | <i>STAMBIP</i>   | 1.363458365 |
| 17,166 | <i>ERF</i>       | 1.366634501 |
| 17,167 | <i>GPR19</i>     | 1.367086414 |
| 17,168 | <i>MAGEB3</i>    | 1.367292046 |
| 17,169 | <i>KLK8</i>      | 1.367999618 |
| 17,170 | <i>GLYAT</i>     | 1.368201136 |
| 17,171 | <i>CTGF</i>      | 1.368486016 |
| 17,172 | <i>SKP1A</i>     | 1.368694171 |
| 17,173 | <i>ZNF580</i>    | 1.368998291 |
| 17,174 | <i>GNG11</i>     | 1.372097892 |
| 17,175 | <i>CTNNA1</i>    | 1.373133411 |
| 17,176 | <i>POLI</i>      | 1.373417354 |
| 17,177 | <i>TNFAIP3</i>   | 1.374026218 |
| 17,178 | <i>CACNB1</i>    | 1.37534431  |
| 17,179 | <i>FN1</i>       | 1.375899513 |
| 17,180 | <i>RBM19</i>     | 1.376051477 |
| 17,181 | <i>RBJ</i>       | 1.376863457 |
| 17,182 | <i>EIF2S1</i>    | 1.379230341 |
| 17,183 | <i>MRE11A</i>    | 1.379465999 |
| 17,184 | <i>KIAA0240</i>  | 1.380632652 |
| 17,185 | <i>EML2</i>      | 1.38094668  |
| 17,186 | <i>DNA2L</i>     | 1.381523041 |
| 17,187 | <i>F25965</i>    | 1.382029319 |
| 17,188 | <i>MGC10500</i>  | 1.382384551 |
| 17,189 | <i>RPN2</i>      | 1.382650231 |
| 17,190 | <i>LOC284361</i> | 1.383264091 |

|        |          |             |
|--------|----------|-------------|
| 17,191 | KIAA0436 | 1.384947717 |
| 17,192 | JMY      | 1.385220943 |
| 17,193 | PCAF     | 1.385790389 |
| 17,194 | COLEC10  | 1.385911746 |
| 17,195 | WFDC9    | 1.3875709   |
| 17,196 | ENTPD8   | 1.388539262 |
| 17,197 | CA6      | 1.38863711  |
| 17,198 | SHANK3   | 1.389241117 |
| 17,199 | CLCN5    | 1.390662022 |
| 17,200 | RNF215   | 1.391475082 |
| 17,201 | FLJ32679 | 1.391501691 |
| 17,202 | OR10J5   | 1.39179461  |
| 17,203 | RARRES1  | 1.392304524 |
| 17,204 | PRKRIR   | 1.39302719  |
| 17,205 | TAF1C    | 1.393970467 |
| 17,206 | SERPINC1 | 1.394028675 |
| 17,207 | MTA3     | 1.394568484 |
| 17,208 | SLC39A4  | 1.394704009 |
| 17,209 | PBX2     | 1.395529475 |
| 17,210 | DDI1     | 1.397770727 |
| 17,211 | C13ORF8  | 1.40027201  |
| 17,212 | CBFA2T3  | 1.400277559 |
| 17,213 | SULT1C2  | 1.401895254 |
| 17,214 | FLJ43654 | 1.402617053 |
| 17,215 | PAX4     | 1.402664519 |
| 17,216 | P2RY4    | 1.403558457 |
| 17,217 | MGC22776 | 1.403806532 |
| 17,218 | PTPRN2   | 1.404315857 |
| 17,219 | TMEM171  | 1.40435189  |
| 17,220 | PPM1A    | 1.405204833 |
| 17,221 | ZNF454   | 1.405330599 |
| 17,222 | CXORF21  | 1.406227951 |
| 17,223 | E2F4     | 1.407987687 |
| 17,224 | C13ORF18 | 1.408230036 |
| 17,225 | MS4A4A   | 1.409919817 |
| 17,226 | KIAA0355 | 1.409974063 |
| 17,227 | SPATA5   | 1.411212009 |
| 17,228 | EVER1    | 1.412115098 |
| 17,229 | SMAD3    | 1.412294221 |
| 17,230 | EIF4B    | 1.412465557 |
| 17,231 | SLC7A14  | 1.412822268 |
| 17,232 | FSCN1    | 1.412887129 |
| 17,233 | ZNF596   | 1.413775302 |
| 17,234 | FBXO40   | 1.4144904   |
| 17,235 | TAF2     | 1.41609136  |
| 17,236 | ELAC2    | 1.416733956 |
| 17,237 | FLJ33008 | 1.417503577 |

|        |                  |             |
|--------|------------------|-------------|
| 17,238 | <i>HSD11B2</i>   | 1.419279964 |
| 17,239 | <i>DEFB107B</i>  | 1.419849599 |
| 17,240 | <i>CD276</i>     | 1.420434037 |
| 17,241 | <i>CHURC1</i>    | 1.420689714 |
| 17,242 | <i>MIG12</i>     | 1.420886286 |
| 17,243 | <i>MMD2</i>      | 1.422194001 |
| 17,244 | <i>UBQLN1</i>    | 1.42242505  |
| 17,245 | <i>LOC284390</i> | 1.422862746 |
| 17,246 | <i>PRNP</i>      | 1.424429914 |
| 17,247 | <i>PRDM5</i>     | 1.424542921 |
| 17,248 | <i>TAS2R9</i>    | 1.425711902 |
| 17,249 | <i>GPLD1</i>     | 1.426596722 |
| 17,250 | <i>OGG1</i>      | 1.427030153 |
| 17,251 | <i>MXRA7</i>     | 1.427152443 |
| 17,252 | <i>FAM26A</i>    | 1.430686587 |
| 17,253 | <i>RNF126</i>    | 1.432241553 |
| 17,254 | <i>PPOX</i>      | 1.432573597 |
| 17,255 | <i>FLJ10534</i>  | 1.433139676 |
| 17,256 | <i>SVH</i>       | 1.433493213 |
| 17,257 | <i>ST3GAL3</i>   | 1.433618451 |
| 17,258 | <i>MUC7</i>      | 1.434916762 |
| 17,259 | <i>ABCB6</i>     | 1.435620903 |
| 17,260 | <i>RPL13A</i>    | 1.435796031 |
| 17,261 | <i>KCNQ3</i>     | 1.437617467 |
| 17,262 | <i>SFRS5</i>     | 1.444064092 |
| 17,263 | <i>CLPP</i>      | 1.444264009 |
| 17,264 | <i>R3HDM</i>     | 1.444863475 |
| 17,265 | <i>MGC955</i>    | 1.445125889 |
| 17,266 | <i>OR4X1</i>     | 1.445201733 |
| 17,267 | <i>LOC388969</i> | 1.447061163 |
| 17,268 | <i>LOC388659</i> | 1.447406416 |
| 17,269 | <i>NPAT</i>      | 1.447650991 |
| 17,270 | <i>NPAT</i>      | 1.447650991 |
| 17,271 | <i>NOLA1</i>     | 1.447762129 |
| 17,272 | <i>SNAI2</i>     | 1.448245365 |
| 17,273 | <i>PPP1CB</i>    | 1.449147309 |
| 17,274 | <i>TRIM41</i>    | 1.449801979 |
| 17,275 | <i>WDR5</i>      | 1.450589028 |
| 17,276 | <i>WDR5</i>      | 1.450589028 |
| 17,277 | <i>DNAJB9</i>    | 1.451583644 |
| 17,278 | <i>LOC137886</i> | 1.452255988 |
| 17,279 | <i>FAIM2</i>     | 1.453314901 |
| 17,280 | <i>R3HDML</i>    | 1.454291344 |
| 17,281 | <i>DCLRE1A</i>   | 1.454741135 |
| 17,282 | <i>HTATSF1</i>   | 1.45493565  |
| 17,283 | <i>NSD1</i>      | 1.45773449  |
| 17,284 | <i>SHARP</i>     | 1.459376333 |



|        |                 |             |
|--------|-----------------|-------------|
| 17,285 | <i>KCNG4</i>    | 1.460560805 |
| 17,286 | <i>C17</i>      | 1.461027192 |
| 17,287 | <i>DGAT2L3</i>  | 1.461265549 |
| 17,288 | <i>PGC</i>      | 1.461763404 |
| 17,289 | <i>TRIM65</i>   | 1.462860399 |
| 17,290 | <i>OR5111</i>   | 1.463070582 |
| 17,291 | <i>FLJ20359</i> | 1.46441124  |
| 17,292 | <i>C10orf54</i> | 1.465483554 |
| 17,293 | <i>CENTD1</i>   | 1.466020029 |
| 17,294 | <i>NFKBIL1</i>  | 1.468403392 |
| 17,295 | <i>RAG1</i>     | 1.46901234  |
| 17,296 | <i>GRIA3</i>    | 1.469251958 |
| 17,297 | <i>KRT25B</i>   | 1.470377258 |
| 17,298 | <i>MGC40499</i> | 1.470555574 |
| 17,299 | <i>SLC7A4</i>   | 1.470671109 |
| 17,300 | <i>SRGAP2</i>   | 1.47094415  |
| 17,301 | <i>G6PC2</i>    | 1.471360658 |
| 17,302 | <i>BRF1</i>     | 1.472455101 |
| 17,303 | <i>SPIRE1</i>   | 1.473093515 |
| 17,304 | <i>SPEC2</i>    | 1.474460702 |
| 17,305 | <i>TBL2</i>     | 1.474823132 |
| 17,306 | <i>GNAZ</i>     | 1.475265908 |
| 17,307 | <i>GASP</i>     | 1.475496139 |
| 17,308 | <i>LTBP1</i>    | 1.475951367 |
| 17,309 | <i>HNRPH1</i>   | 1.47859288  |
| 17,310 | <i>PCNXL2</i>   | 1.479542908 |
| 17,311 | <i>EVI2B</i>    | 1.482183337 |
| 17,312 | <i>MGST1</i>    | 1.482268355 |
| 17,313 | <i>ZNF540</i>   | 1.483297406 |
| 17,314 | <i>RHBDL6</i>   | 1.483565054 |
| 17,315 | <i>GAS6</i>     | 1.48388074  |
| 17,316 | <i>KRT2A</i>    | 1.484372577 |
| 17,317 | <i>BST2</i>     | 1.48563088  |
| 17,318 | <i>ELP4</i>     | 1.486112567 |
| 17,319 | <i>ELP4</i>     | 1.486112567 |
| 17,320 | <i>AQP3</i>     | 1.488723826 |
| 17,321 | <i>AGA</i>      | 1.489053187 |
| 17,322 | <i>PEO1</i>     | 1.490302309 |
| 17,323 | <i>SCNN1A</i>   | 1.491767826 |
| 17,324 | <i>TRAP1</i>    | 1.493094851 |
| 17,325 | <i>GGTL3</i>    | 1.493719663 |
| 17,326 | <i>ALOX12B</i>  | 1.49410241  |
| 17,327 | <i>HS3ST5</i>   | 1.494422601 |
| 17,328 | <i>RASSF5</i>   | 1.494623354 |
| 17,329 | <i>LMTK2</i>    | 1.496272221 |
| 17,330 | <i>SNX24</i>    | 1.498367657 |
| 17,331 | <i>MAPK7</i>    | 1.500173482 |

|        |                  |             |
|--------|------------------|-------------|
| 17,332 | <i>OR4K1</i>     | 1.501335767 |
| 17,333 | <i>DSCR2</i>     | 1.503952362 |
| 17,334 | <i>XPNPEP2</i>   | 1.504602106 |
| 17,335 | <i>C1ORF9</i>    | 1.504660912 |
| 17,336 | <i>SSH2</i>      | 1.504855282 |
| 17,337 | <i>CAPN13</i>    | 1.504970742 |
| 17,338 | <i>LOC401898</i> | 1.505513039 |
| 17,339 | <i>SNARK</i>     | 1.505991507 |
| 17,340 | <i>P2RX2</i>     | 1.50659535  |
| 17,341 | <i>MCAM</i>      | 1.506896688 |
| 17,342 | <i>TOPBP1</i>    | 1.507851246 |
| 17,343 | <i>DDX39</i>     | 1.508667775 |
| 17,344 | <i>SDHA</i>      | 1.508777648 |
| 17,345 | <i>MOCS2</i>     | 1.510135354 |
| 17,346 | <i>FLJ12436</i>  | 1.510312131 |
| 17,347 | <i>C3orf65</i>   | 1.510770929 |
| 17,348 | <i>ACP6</i>      | 1.513895866 |
| 17,349 | <i>SLCO1B1</i>   | 1.513944633 |
| 17,350 | <i>NPY1R</i>     | 1.514406828 |
| 17,351 | <i>ARL4C</i>     | 1.515507605 |
| 17,352 | <i>MTVR1</i>     | 1.517637598 |
| 17,353 | <i>KRTHB4</i>    | 1.517977703 |
| 17,354 | <i>FAM72A</i>    | 1.518327937 |
| 17,355 | <i>OR7C1</i>     | 1.519505884 |
| 17,356 | <i>CXXC4</i>     | 1.520068989 |
| 17,357 | <i>PCM1</i>      | 1.520154491 |
| 17,358 | <i>POU2F1</i>    | 1.520175    |
| 17,359 | <i>HSRG1</i>     | 1.520455602 |
| 17,360 | <i>PEX11B</i>    | 1.521770253 |
| 17,361 | <i>FLJ39369</i>  | 1.52242666  |
| 17,362 | <i>RPL21</i>     | 1.523037343 |
| 17,363 | <i>SMYD3</i>     | 1.523989194 |
| 17,364 | <i>C9ORF23</i>   | 1.52545673  |
| 17,365 | <i>NIP</i>       | 1.525645154 |
| 17,366 | <i>LOC346157</i> | 1.530799048 |
| 17,367 | <i>MS4A6A</i>    | 1.532028415 |
| 17,368 | <i>C18ORF19</i>  | 1.53268467  |
| 17,369 | <i>LZTS2</i>     | 1.533474671 |
| 17,370 | <i>RPL5</i>      | 1.53417852  |
| 17,371 | <i>CA13</i>      | 1.53478408  |
| 17,372 | <i>CDSN</i>      | 1.535139733 |
| 17,373 | <i>TFAP2C</i>    | 1.535698647 |
| 17,374 | <i>HIC1</i>      | 1.535780445 |
| 17,375 | <i>ANKH</i>      | 1.535835702 |
| 17,376 | <i>KCNK3</i>     | 1.53659647  |
| 17,377 | <i>FBS1</i>      | 1.537223852 |
| 17,378 | <i>TTC16</i>     | 1.539163279 |

|        |                  |             |
|--------|------------------|-------------|
| 17,379 | <i>VSNL1</i>     | 1.539428187 |
| 17,380 | <i>DMN</i>       | 1.540431252 |
| 17,381 | <i>ZBTB12</i>    | 1.542763531 |
| 17,382 | <i>TDRD6</i>     | 1.54327082  |
| 17,383 | <i>IL20RB</i>    | 1.545190493 |
| 17,384 | <i>PTPN21</i>    | 1.547985624 |
| 17,385 | <i>DDI2</i>      | 1.548810987 |
| 17,386 | <i>LCN2</i>      | 1.549546301 |
| 17,387 | <i>PHF23</i>     | 1.55050665  |
| 17,388 | <i>CD99L2</i>    | 1.550519985 |
| 17,389 | <i>TRPM2</i>     | 1.552116741 |
| 17,390 | <i>MGC15619</i>  | 1.554231895 |
| 17,391 | <i>MDM2</i>      | 1.556262101 |
| 17,392 | <i>FLJ43582</i>  | 1.55785661  |
| 17,393 | <i>DEFB114</i>   | 1.558786668 |
| 17,394 | <i>NEIL1</i>     | 1.559955797 |
| 17,395 | <i>MRPL10</i>    | 1.560594514 |
| 17,396 | <i>C6ORF192</i>  | 1.561322422 |
| 17,397 | <i>VNN1</i>      | 1.563335154 |
| 17,398 | <i>ITPR1</i>     | 1.565599649 |
| 17,399 | <i>C2ORF28</i>   | 1.565735544 |
| 17,400 | <i>WDR70</i>     | 1.565927373 |
| 17,401 | <i>SLC39A11</i>  | 1.569265784 |
| 17,402 | <i>TNFRSF4</i>   | 1.571006421 |
| 17,403 | <i>OR9A4</i>     | 1.572603514 |
| 17,404 | <i>P2RY6</i>     | 1.574409285 |
| 17,405 | <i>TMEM16F</i>   | 1.575068575 |
| 17,406 | <i>STXBP4</i>    | 1.575233019 |
| 17,407 | <i>TEX261</i>    | 1.576216409 |
| 17,408 | <i>PUS1</i>      | 1.576222045 |
| 17,409 | <i>MGC4606</i>   | 1.576982007 |
| 17,410 | <i>MIXL1</i>     | 1.57705352  |
| 17,411 | <i>KIAA0582</i>  | 1.578805765 |
| 17,412 | <i>MFTC</i>      | 1.579972521 |
| 17,413 | <i>SPN</i>       | 1.581943416 |
| 17,414 | <i>LOC219854</i> | 1.583006893 |
| 17,415 | <i>BAIAP2</i>    | 1.584509263 |
| 17,416 | <i>CYP2B6</i>    | 1.585523518 |
| 17,417 | <i>CEACAM5</i>   | 1.58636733  |
| 17,418 | <i>CHRND</i>     | 1.586563529 |
| 17,419 | <i>FAM26C</i>    | 1.58666433  |
| 17,420 | <i>ABLIM3</i>    | 1.586993005 |
| 17,421 | <i>RGS4</i>      | 1.588109089 |
| 17,422 | <i>LSM8</i>      | 1.588710383 |
| 17,423 | <i>GAS41</i>     | 1.589698426 |
| 17,424 | <i>LOC83468</i>  | 1.590828923 |
| 17,425 | <i>TAS2R49</i>   | 1.590883848 |

|        |                     |             |
|--------|---------------------|-------------|
| 17,426 | <i>FLJ33979</i>     | 1.591615164 |
| 17,427 | <i>SUSD1</i>        | 1.592156175 |
| 17,428 | <i>LGALS9</i>       | 1.592967084 |
| 17,429 | <i>MFAP5</i>        | 1.593049315 |
| 17,430 | <i>MPP4</i>         | 1.593742574 |
| 17,431 | <i>RAD23B</i>       | 1.594119172 |
| 17,432 | <i>RFWD2</i>        | 1.594511246 |
| 17,433 | <i>MED28</i>        | 1.597518716 |
| 17,434 | <i>LOC339834</i>    | 1.598249636 |
| 17,435 | <i>CSTL1</i>        | 1.598683909 |
| 17,436 | <i>DKFZP761D221</i> | 1.599188494 |
| 17,437 | <i>HRASLS3</i>      | 1.600076326 |
| 17,438 | <i>OR5D14</i>       | 1.601586384 |
| 17,439 | <i>HLA-DRB1</i>     | 1.602818405 |
| 17,440 | <i>LSS</i>          | 1.603373542 |
| 17,441 | <i>HSPC121</i>      | 1.603446432 |
| 17,442 | <i>LMO3</i>         | 1.603917428 |
| 17,443 | <i>KRT17</i>        | 1.606449222 |
| 17,444 | <i>MS4A8B</i>       | 1.606565102 |
| 17,445 | <i>MYH9</i>         | 1.60900074  |
| 17,446 | <i>LGALS13</i>      | 1.609044132 |
| 17,447 | <i>DNMT1</i>        | 1.610015772 |
| 17,448 | <i>LOC91137</i>     | 1.611733305 |
| 17,449 | <i>A4GALT</i>       | 1.612457038 |
| 17,450 | <i>TTBK2</i>        | 1.612985406 |
| 17,451 | <i>NT5C</i>         | 1.61630642  |
| 17,452 | <i>RYBP</i>         | 1.616839658 |
| 17,453 | <i>MRPS6</i>        | 1.618900394 |
| 17,454 | <i>F2RL2</i>        | 1.619167094 |
| 17,455 | <i>APIN</i>         | 1.619205461 |
| 17,456 | <i>GAB3</i>         | 1.621076402 |
| 17,457 | <i>LOC342357</i>    | 1.624014308 |
| 17,458 | <i>C6ORF142</i>     | 1.624211008 |
| 17,459 | <i>REV3L</i>        | 1.624470912 |
| 17,460 | <i>PCGF6</i>        | 1.625999034 |
| 17,461 | <i>ADAM10</i>       | 1.626057037 |
| 17,462 | <i>POLR2I</i>       | 1.626389448 |
| 17,463 | <i>CYP4A11</i>      | 1.627010564 |
| 17,464 | <i>ABCC12</i>       | 1.627526075 |
| 17,465 | <i>LOC389072</i>    | 1.62832322  |
| 17,466 | <i>CPT1C</i>        | 1.63002628  |
| 17,467 | <i>GYPB</i>         | 1.630249784 |
| 17,468 | <i>POLR2B</i>       | 1.632181955 |
| 17,469 | <i>LOC90835</i>     | 1.632655139 |
| 17,470 | <i>C21ORF62</i>     | 1.63425324  |
| 17,471 | <i>BZW2</i>         | 1.634353373 |
| 17,472 | <i>ATP8B2</i>       | 1.634868182 |

|        |               |             |
|--------|---------------|-------------|
| 17,473 | VEGFC         | 1.634904397 |
| 17,474 | OGFR          | 1.635123703 |
| 17,475 | MGMT          | 1.635969665 |
| 17,476 | PDE6G         | 1.636313354 |
| 17,477 | TOR2A         | 1.63637163  |
| 17,478 | FAM26B        | 1.636371969 |
| 17,479 | HSPC171       | 1.637763125 |
| 17,480 | KIAA0020      | 1.638269515 |
| 17,481 | PTPRF         | 1.639319395 |
| 17,482 | TYSND1        | 1.640430021 |
| 17,483 | LOC84549      | 1.640810145 |
| 17,484 | CYSLTR2       | 1.642673215 |
| 17,485 | SRP19         | 1.644807647 |
| 17,486 | HNRNPG-T      | 1.645050929 |
| 17,487 | GPR64         | 1.645486158 |
| 17,488 | FLJ38101      | 1.645866204 |
| 17,489 | ZNF238        | 1.647360687 |
| 17,490 | USP1          | 1.6478405   |
| 17,491 | EEA1          | 1.650896136 |
| 17,492 | VAMP8         | 1.6509862   |
| 17,493 | K5B           | 1.651261306 |
| 17,494 | DKFZP761D0211 | 1.652373627 |
| 17,495 | KCNH5         | 1.652425021 |
| 17,496 | NCOA1         | 1.653264784 |
| 17,497 | MESP1         | 1.653751897 |
| 17,498 | HECTD1        | 1.655500486 |
| 17,499 | IFI35         | 1.655684909 |
| 17,500 | ZNF646        | 1.657075008 |
| 17,501 | RSHL1         | 1.658588675 |
| 17,502 | FLJ14775      | 1.660284194 |
| 17,503 | UGT2A1        | 1.661818892 |
| 17,504 | MIA           | 1.661860603 |
| 17,505 | MIA           | 1.661860603 |
| 17,506 | VAV2          | 1.663755084 |
| 17,507 | UNQ8193       | 1.663990824 |
| 17,508 | KRTHA3A       | 1.66610961  |
| 17,509 | PCDHB1        | 1.66717771  |
| 17,510 | ZNF221        | 1.667420097 |
| 17,511 | RNUXA         | 1.66817146  |
| 17,512 | RBM28         | 1.670195933 |
| 17,513 | IGFALS        | 1.670594358 |
| 17,514 | PHCA          | 1.67069114  |
| 17,515 | DUX4          | 1.670876557 |
| 17,516 | DNAJC5B       | 1.673446711 |
| 17,517 | EIF3S3        | 1.673650387 |
| 17,518 | GPRC5D        | 1.675125852 |
| 17,519 | CSDA          | 1.678240612 |

|        |                  |             |
|--------|------------------|-------------|
| 17,520 | <i>LOC51149</i>  | 1.678244458 |
| 17,521 | <i>PTPN5</i>     | 1.680656663 |
| 17,522 | <i>AXIN1</i>     | 1.681170947 |
| 17,523 | <i>OFCC1</i>     | 1.683017896 |
| 17,524 | <i>G10</i>       | 1.683712927 |
| 17,525 | <i>GPR54</i>     | 1.684718782 |
| 17,526 | <i>H1T2</i>      | 1.685219471 |
| 17,527 | <i>SMTN</i>      | 1.686559199 |
| 17,528 | <i>CHRNA4</i>    | 1.688801476 |
| 17,529 | <i>BCL2L14</i>   | 1.691281704 |
| 17,530 | <i>NDUFB3</i>    | 1.692207508 |
| 17,531 | <i>HTR1A</i>     | 1.692374974 |
| 17,532 | <i>KCNE1</i>     | 1.692488279 |
| 17,533 | <i>ANXA4</i>     | 1.693182783 |
| 17,534 | <i>CAP2</i>      | 1.69368474  |
| 17,535 | <i>C10ORF33</i>  | 1.695313367 |
| 17,536 | <i>C11ORF10</i>  | 1.697284892 |
| 17,537 | <i>ARID4B</i>    | 1.698134212 |
| 17,538 | <i>NAT5</i>      | 1.699683613 |
| 17,539 | <i>C18ORF17</i>  | 1.702566333 |
| 17,540 | <i>SPAG4</i>     | 1.703043129 |
| 17,541 | <i>SKIL</i>      | 1.703958501 |
| 17,542 | <i>CHRNA6</i>    | 1.704668849 |
| 17,543 | <i>VCX</i>       | 1.705955688 |
| 17,544 | <i>SERPINA3</i>  | 1.706686517 |
| 17,545 | <i>C20ORF28</i>  | 1.707975146 |
| 17,546 | <i>DEAF1</i>     | 1.708455058 |
| 17,547 | <i>MGC35274</i>  | 1.708611412 |
| 17,548 | <i>SEPHS2</i>    | 1.710409916 |
| 17,549 | <i>LDHB</i>      | 1.712012234 |
| 17,550 | <i>FLJ23447</i>  | 1.712270388 |
| 17,551 | <i>FLJ21127</i>  | 1.712390869 |
| 17,552 | <i>PGDS</i>      | 1.714015631 |
| 17,553 | <i>NMBR</i>      | 1.714764263 |
| 17,554 | <i>KIAA1720</i>  | 1.715555111 |
| 17,555 | <i>RAI3</i>      | 1.715933523 |
| 17,556 | <i>SHOC2</i>     | 1.717491189 |
| 17,557 | <i>SLC4A3</i>    | 1.718300865 |
| 17,558 | <i>HK2</i>       | 1.71830882  |
| 17,559 | <i>PLCB3</i>     | 1.718614803 |
| 17,560 | <i>CLIC4</i>     | 1.719946934 |
| 17,561 | <i>FLJ45909</i>  | 1.720685931 |
| 17,562 | <i>LOC116143</i> | 1.721110655 |
| 17,563 | <i>ZNF34</i>     | 1.723313881 |
| 17,564 | <i>SERPINA7</i>  | 1.724904627 |
| 17,565 | <i>FLJ36198</i>  | 1.725179025 |
| 17,566 | <i>ASPRV1</i>    | 1.726403496 |

|        |                     |             |
|--------|---------------------|-------------|
| 17,567 | <i>DDX31</i>        | 1.726619739 |
| 17,568 | <i>FLJ42957</i>     | 1.730162608 |
| 17,569 | <i>FANCL</i>        | 1.733084401 |
| 17,570 | <i>LOC93349</i>     | 1.733188682 |
| 17,571 | <i>TOMM20</i>       | 1.733960303 |
| 17,572 | <i>AHCY</i>         | 1.73411158  |
| 17,573 | <i>OR52B4</i>       | 1.734405874 |
| 17,574 | <i>RP11-31H15.5</i> | 1.734730894 |
| 17,575 | <i>PPP1R3C</i>      | 1.739293219 |
| 17,576 | <i>LRRC28</i>       | 1.740168475 |
| 17,577 | <i>C14ORF39</i>     | 1.74094155  |
| 17,578 | <i>FRS2</i>         | 1.741214956 |
| 17,579 | <i>POLR2F</i>       | 1.741396677 |
| 17,580 | <i>XCR1</i>         | 1.742748453 |
| 17,581 | <i>LOC441282</i>    | 1.744786416 |
| 17,582 | <i>FAM31C</i>       | 1.745535577 |
| 17,583 | <i>ZNF71</i>        | 1.747187497 |
| 17,584 | <i>PTPDC1</i>       | 1.747225485 |
| 17,585 | <i>TEBP</i>         | 1.750244825 |
| 17,586 | <i>KIAA1068</i>     | 1.750958503 |
| 17,587 | <i>KIAA1913</i>     | 1.751345082 |
| 17,588 | <i>IGFBP4</i>       | 1.751931312 |
| 17,589 | <i>LOC400566</i>    | 1.755240009 |
| 17,590 | <i>C7ORF28A</i>     | 1.75585628  |
| 17,591 | <i>FUCA1</i>        | 1.757707308 |
| 17,592 | <i>ALDH1A1</i>      | 1.758054472 |
| 17,593 | <i>PURB</i>         | 1.758325308 |
| 17,594 | <i>LOC780776</i>    | 1.759204189 |
| 17,595 | <i>PPP3CA</i>       | 1.761223601 |
| 17,596 | <i>MLNR</i>         | 1.761501023 |
| 17,597 | <i>CFTR</i>         | 1.762507418 |
| 17,598 | <i>UNQ9438</i>      | 1.763972779 |
| 17,599 | <i>IL23A</i>        | 1.764908342 |
| 17,600 | <i>FLJ31842</i>     | 1.768812003 |
| 17,601 | <i>ARID4A</i>       | 1.773591774 |
| 17,602 | <i>RNF169</i>       | 1.774812407 |
| 17,603 | <i>TNXB</i>         | 1.775672441 |
| 17,604 | <i>FLJ10408</i>     | 1.776939011 |
| 17,605 | <i>MRLC2</i>        | 1.77701516  |
| 17,606 | <i>HRB2</i>         | 1.778567969 |
| 17,607 | <i>HYOU1</i>        | 1.788449893 |
| 17,608 | <i>KCNJ5</i>        | 1.792711632 |
| 17,609 | <i>GPHN</i>         | 1.793008792 |
| 17,610 | <i>IFNA17</i>       | 1.794058247 |
| 17,611 | <i>RNF208</i>       | 1.794984823 |
| 17,612 | <i>ATAD2</i>        | 1.796606375 |
| 17,613 | <i>CYP19A1</i>      | 1.798790277 |

|        |                  |             |
|--------|------------------|-------------|
| 17,614 | <i>LOC161247</i> | 1.799948427 |
| 17,615 | <i>ODF2</i>      | 1.802478172 |
| 17,616 | <i>C18ORF21</i>  | 1.803787162 |
| 17,617 | <i>MGC:13379</i> | 1.804499969 |
| 17,618 | <i>PRH1</i>      | 1.80468668  |
| 17,619 | <i>ARC92</i>     | 1.80511465  |
| 17,620 | <i>NCF1</i>      | 1.808430741 |
| 17,621 | <i>FLJ10665</i>  | 1.809473008 |
| 17,622 | <i>CGB7</i>      | 1.810039302 |
| 17,623 | <i>SLC2A2</i>    | 1.812153359 |
| 17,624 | <i>TTC8</i>      | 1.81315527  |
| 17,625 | <i>CSNK1G1</i>   | 1.814454555 |
| 17,626 | <i>TPD52</i>     | 1.815908043 |
| 17,627 | <i>C6ORF136</i>  | 1.816156331 |
| 17,628 | <i>PRDM16</i>    | 1.81941942  |
| 17,629 | <i>USF2</i>      | 1.821447037 |
| 17,630 | <i>FBXO38</i>    | 1.821777897 |
| 17,631 | <i>LOC93343</i>  | 1.821842048 |
| 17,632 | <i>OR6B1</i>     | 1.822590706 |
| 17,633 | <i>C6ORF191</i>  | 1.822685914 |
| 17,634 | <i>CXADR</i>     | 1.823189569 |
| 17,635 | <i>TUBB4</i>     | 1.824060872 |
| 17,636 | <i>HIF1AN</i>    | 1.825847499 |
| 17,637 | <i>TARDBP</i>    | 1.827282438 |
| 17,638 | <i>IL2RB</i>     | 1.836309396 |
| 17,639 | <i>ECT2</i>      | 1.837893699 |
| 17,640 | <i>ITGAV</i>     | 1.838311204 |
| 17,641 | <i>CYP11B2</i>   | 1.839031035 |
| 17,642 | <i>ZNF555</i>    | 1.839770965 |
| 17,643 | <i>TNFRSF5</i>   | 1.841408257 |
| 17,644 | <i>FLJ23834</i>  | 1.844218003 |
| 17,645 | <i>C9ORF59</i>   | 1.844407852 |
| 17,646 | <i>ANKRD24</i>   | 1.844674707 |
| 17,647 | <i>SKI</i>       | 1.846463072 |
| 17,648 | <i>TERF2</i>     | 1.846537448 |
| 17,649 | <i>CPOX</i>      | 1.84851251  |
| 17,650 | <i>H1FX</i>      | 1.852963486 |
| 17,651 | <i>DHRS3</i>     | 1.85403437  |
| 17,652 | <i>DULLARD</i>   | 1.854426127 |
| 17,653 | <i>CDK5RAP2</i>  | 1.8555377   |
| 17,654 | <i>BTN1A1</i>    | 1.85833106  |
| 17,655 | <i>FXYD4</i>     | 1.858885979 |
| 17,656 | <i>TBL1Y</i>     | 1.861731897 |
| 17,657 | <i>ZNF395</i>    | 1.862185769 |
| 17,658 | <i>ITGAE</i>     | 1.864660354 |
| 17,659 | <i>COPS8</i>     | 1.864730061 |
| 17,660 | <i>GCM1</i>      | 1.866159935 |



|        |                      |             |
|--------|----------------------|-------------|
| 17,661 | <i>CKLF</i>          | 1.866825141 |
| 17,662 | <i>LRP16</i>         | 1.867514582 |
| 17,663 | <i>C7ORF3</i>        | 1.873624538 |
| 17,664 | <i>MPP1</i>          | 1.874172761 |
| 17,665 | <i>SNX12</i>         | 1.875836695 |
| 17,666 | <i>DKFZP564D1378</i> | 1.876599075 |
| 17,667 | <i>CACH-1</i>        | 1.877455101 |
| 17,668 | <i>COL9A2</i>        | 1.87767278  |
| 17,669 | <i>COL9A2</i>        | 1.87767278  |
| 17,670 | <i>PGK2</i>          | 1.879968475 |
| 17,671 | <i>DDX21</i>         | 1.880599297 |
| 17,672 | <i>ONECUT2</i>       | 1.883422584 |
| 17,673 | <i>TFB2M</i>         | 1.886356625 |
| 17,674 | <i>ZNF394</i>        | 1.887404779 |
| 17,675 | <i>C14ORF102</i>     | 1.887478935 |
| 17,676 | <i>ATP2B2</i>        | 1.888725012 |
| 17,677 | <i>FLJ38144</i>      | 1.888747916 |
| 17,678 | <i>SLCO6A1</i>       | 1.88926937  |
| 17,679 | <i>PLEKHA3</i>       | 1.889789591 |
| 17,680 | <i>ACCN5</i>         | 1.890837112 |
| 17,681 | <i>MAB21L1</i>       | 1.892155466 |
| 17,682 | <i>C6ORF146</i>      | 1.892628219 |
| 17,683 | <i>OPN5</i>          | 1.893753033 |
| 17,684 | <i>SRGAP1</i>        | 1.894164339 |
| 17,685 | <i>NDST2</i>         | 1.894246186 |
| 17,686 | <i>SCRT2</i>         | 1.894886855 |
| 17,687 | <i>RNF12</i>         | 1.89508578  |
| 17,688 | <i>CYB5-M</i>        | 1.898052309 |
| 17,689 | <i>OR56A4</i>        | 1.900721639 |
| 17,690 | <i>TRPM1</i>         | 1.902901035 |
| 17,691 | <i>C6ORF66</i>       | 1.903920138 |
| 17,692 | <i>TAAR2</i>         | 1.904549949 |
| 17,693 | <i>TGIF2</i>         | 1.904776188 |
| 17,694 | <i>DLL1</i>          | 1.905383269 |
| 17,695 | <i>EMR1</i>          | 1.908211409 |
| 17,696 | <i>CTXL</i>          | 1.908561503 |
| 17,697 | <i>TRHDE</i>         | 1.909607765 |
| 17,698 | <i>FLJ20397</i>      | 1.912366648 |
| 17,699 | <i>C10RF42</i>       | 1.91281914  |
| 17,700 | <i>MCP</i>           | 1.914861018 |
| 17,701 | <i>PPHLN1</i>        | 1.915832862 |
| 17,702 | <i>COX7A2</i>        | 1.916266014 |
| 17,703 | <i>SPRR1A</i>        | 1.919609704 |
| 17,704 | <i>C10ORF7</i>       | 1.921308878 |
| 17,705 | <i>TRIM56</i>        | 1.925977407 |
| 17,706 | <i>PTGIR</i>         | 1.926630867 |
| 17,707 | <i>SEMA4C</i>        | 1.926941276 |

|        |                  |             |
|--------|------------------|-------------|
| 17,708 | <i>C1orf186</i>  | 1.928820995 |
| 17,709 | <i>NAT5</i>      | 1.929055988 |
| 17,710 | <i>GTL3</i>      | 1.931109709 |
| 17,711 | <i>C20ORF114</i> | 1.931498984 |
| 17,712 | <i>GPR157</i>    | 1.9344293   |
| 17,713 | <i>UBR1</i>      | 1.938344432 |
| 17,714 | <i>HNRPUL2</i>   | 1.938643162 |
| 17,715 | <i>UNQ1912</i>   | 1.939697454 |
| 17,716 | <i>GSTK1</i>     | 1.941917032 |
| 17,717 | <i>CTRC</i>      | 1.942100261 |
| 17,718 | <i>DGCR14</i>    | 1.94460991  |
| 17,719 | <i>SLC18A2</i>   | 1.945000742 |
| 17,720 | <i>KIAA0644</i>  | 1.945284648 |
| 17,721 | <i>DBN1</i>      | 1.948545214 |
| 17,722 | <i>TRAF4</i>     | 1.948754756 |
| 17,723 | <i>FZD5</i>      | 1.949171545 |
| 17,724 | <i>PREI3</i>     | 1.950332523 |
| 17,725 | <i>NPM1</i>      | 1.950646532 |
| 17,726 | <i>NPIP</i>      | 1.951786976 |
| 17,727 | <i>ATR</i>       | 1.952842669 |
| 17,728 | <i>MGC33424</i>  | 1.953788562 |
| 17,729 | <i>B4GALT5</i>   | 1.957040163 |
| 17,730 | <i>SLC27A5</i>   | 1.957334579 |
| 17,731 | <i>LOC613212</i> | 1.957903899 |
| 17,732 | <i>FLJ23614</i>  | 1.960261373 |
| 17,733 | <i>MMP8</i>      | 1.963926029 |
| 17,734 | <i>MEA</i>       | 1.965374638 |
| 17,735 | <i>C8G</i>       | 1.965851809 |
| 17,736 | <i>OCLM</i>      | 1.966167321 |
| 17,737 | <i>MGC45441</i>  | 1.967941505 |
| 17,738 | <i>FEZ1</i>      | 1.968002121 |
| 17,739 | <i>TCP11</i>     | 1.96975649  |
| 17,740 | <i>TNS</i>       | 1.971959944 |
| 17,741 | <i>ABCG1</i>     | 1.97332495  |
| 17,742 | <i>MONDOA</i>    | 1.973957481 |
| 17,743 | <i>HIST3H3</i>   | 1.976556426 |
| 17,744 | <i>GATA6</i>     | 1.981051849 |
| 17,745 | <i>CPZ</i>       | 1.981271607 |
| 17,746 | <i>IRX4</i>      | 1.98153627  |
| 17,747 | <i>DLG2</i>      | 1.986834366 |
| 17,748 | <i>SLC7A3</i>    | 1.988777541 |
| 17,749 | <i>GATA5</i>     | 1.992232831 |
| 17,750 | <i>PCDH8</i>     | 1.993319455 |
| 17,751 | <i>PBOV1</i>     | 1.993456451 |
| 17,752 | <i>LOC129285</i> | 1.994335369 |
| 17,753 | <i>NOX5</i>      | 1.994631478 |
| 17,754 | <i>MGC17986</i>  | 1.995843048 |

|        |                      |             |
|--------|----------------------|-------------|
| 17,755 | <i>TMEM24</i>        | 1.997478828 |
| 17,756 | <i>RIOK2</i>         | 1.997767095 |
| 17,757 | <i>FLJ10521</i>      | 1.99804594  |
| 17,758 | <i>ZNF494</i>        | 1.998061789 |
| 17,759 | <i>TMEM38A</i>       | 1.998450063 |
| 17,760 | <i>KCTD4</i>         | 1.998492912 |
| 17,761 | <i>CTDSP1</i>        | 2.002924416 |
| 17,762 | <i>OR4F4</i>         | 2.003474404 |
| 17,763 | <i>OR6N2</i>         | 2.004929792 |
| 17,764 | <i>DKFZP586L0724</i> | 2.00575394  |
| 17,765 | <i>MGC10715</i>      | 2.009448346 |
| 17,766 | <i>MC4R</i>          | 2.009461536 |
| 17,767 | <i>STK35</i>         | 2.009562854 |
| 17,768 | <i>MFRP</i>          | 2.010611164 |
| 17,769 | <i>SUMF2</i>         | 2.011822689 |
| 17,770 | <i>ENO3</i>          | 2.013487311 |
| 17,771 | <i>ADAM7</i>         | 2.017688221 |
| 17,772 | <i>MAML1</i>         | 2.020911429 |
| 17,773 | <i>KCNE1L</i>        | 2.021346822 |
| 17,774 | <i>FLJ12439</i>      | 2.023538323 |
| 17,775 | <i>PDZK10</i>        | 2.026875507 |
| 17,776 | <i>INA</i>           | 2.028065844 |
| 17,777 | <i>L1CAM</i>         | 2.02859021  |
| 17,778 | <i>DCTN2</i>         | 2.031247092 |
| 17,779 | <i>SIAT7F</i>        | 2.032483893 |
| 17,780 | <i>FLJ25555</i>      | 2.034465891 |
| 17,781 | <i>FLJ40365</i>      | 2.035023423 |
| 17,782 | <i>ANAPC7</i>        | 2.036443966 |
| 17,783 | <i>CUL5</i>          | 2.037852953 |
| 17,784 | <i>FLJ20255</i>      | 2.039053292 |
| 17,785 | <i>FLJ39576</i>      | 2.040543137 |
| 17,786 | <i>P2RY1</i>         | 2.040615422 |
| 17,787 | <i>GUK1</i>          | 2.042087984 |
| 17,788 | <i>LOC201229</i>     | 2.04326551  |
| 17,789 | <i>ITGB5</i>         | 2.043801577 |
| 17,790 | <i>ALDOA</i>         | 2.04506653  |
| 17,791 | <i>PEG3</i>          | 2.04590247  |
| 17,792 | <i>FLJ37794</i>      | 2.046756505 |
| 17,793 | <i>TRAPPC5</i>       | 2.048529471 |
| 17,794 | <i>TNNC1</i>         | 2.053261059 |
| 17,795 | <i>CLEC2</i>         | 2.055852283 |
| 17,796 | <i>RASAL1</i>        | 2.059422718 |
| 17,797 | <i>DNAH11</i>        | 2.060620245 |
| 17,798 | <i>PRR4</i>          | 2.062082951 |
| 17,799 | <i>DAPK1</i>         | 2.064563276 |
| 17,800 | <i>TAF6</i>          | 2.064877215 |
| 17,801 | <i>HAS1</i>          | 2.065686735 |

|        |                 |             |
|--------|-----------------|-------------|
| 17,802 | <i>C7ORF2</i>   | 2.069338919 |
| 17,803 | <i>GTF2A2</i>   | 2.07503323  |
| 17,804 | <i>GUCY1A2</i>  | 2.078386372 |
| 17,805 | <i>TAF11</i>    | 2.079635818 |
| 17,806 | <i>KLRD1</i>    | 2.079827644 |
| 17,807 | <i>UXT</i>      | 2.082418866 |
| 17,808 | <i>PTGDS</i>    | 2.089553137 |
| 17,809 | <i>MAPBPIP</i>  | 2.090501206 |
| 17,810 | <i>RNF130</i>   | 2.09176158  |
| 17,811 | <i>PPP1R1B</i>  | 2.09375664  |
| 17,812 | <i>ZNF444</i>   | 2.094250561 |
| 17,813 | <i>KIAA1959</i> | 2.095104307 |
| 17,814 | <i>MCTS1</i>    | 2.095728238 |
| 17,815 | <i>PCDHB4</i>   | 2.095918015 |
| 17,816 | <i>PRDM12</i>   | 2.098006279 |
| 17,817 | <i>ALAD</i>     | 2.101173148 |
| 17,818 | <i>ORMDL3</i>   | 2.105074626 |
| 17,819 | <i>HOXD3</i>    | 2.105220136 |
| 17,820 | <i>IGSF1</i>    | 2.112448651 |
| 17,821 | <i>IGSF1</i>    | 2.112448651 |
| 17,822 | <i>COG8</i>     | 2.113293631 |
| 17,823 | <i>CRMP1</i>    | 2.113799269 |
| 17,824 | <i>UBE2C</i>    | 2.114429962 |
| 17,825 | <i>SLC5A3</i>   | 2.116974233 |
| 17,826 | <i>C20ORF23</i> | 2.11812557  |
| 17,827 | <i>WDR8</i>     | 2.119751761 |
| 17,828 | <i>KIAA1718</i> | 2.121711966 |
| 17,829 | <i>TGFA</i>     | 2.124686262 |
| 17,830 | <i>KCNQ4</i>    | 2.127320449 |
| 17,831 | <i>UMOD</i>     | 2.127772512 |
| 17,832 | <i>BMP10</i>    | 2.132166776 |
| 17,833 | <i>NSMAF</i>    | 2.135224135 |
| 17,834 | <i>ZNF161</i>   | 2.136236376 |
| 17,835 | <i>ZSWIM3</i>   | 2.137434759 |
| 17,836 | <i>LUM</i>      | 2.140961434 |
| 17,837 | <i>FTSJ1</i>    | 2.143597878 |
| 17,838 | <i>LMX1B</i>    | 2.145613375 |
| 17,839 | <i>SLC22A11</i> | 2.146024134 |
| 17,840 | <i>OR2L3</i>    | 2.155737829 |
| 17,841 | <i>SEN3</i>     | 2.160369423 |
| 17,842 | <i>P53AIP1</i>  | 2.161480086 |
| 17,843 | <i>OR11H1</i>   | 2.162609907 |
| 17,844 | <i>POU2F3</i>   | 2.164267258 |
| 17,845 | <i>CTAGE4</i>   | 2.165416051 |
| 17,846 | <i>MOBK12C</i>  | 2.166628353 |
| 17,847 | <i>PLAUR</i>    | 2.169397114 |
| 17,848 | <i>HYPE</i>     | 2.170233183 |

|        |                  |             |
|--------|------------------|-------------|
| 17,849 | <i>LOC338809</i> | 2.171363696 |
| 17,850 | <i>ARR3</i>      | 2.172232817 |
| 17,851 | <i>HSD17B1</i>   | 2.172381845 |
| 17,852 | <i>GSK3B</i>     | 2.173342319 |
| 17,853 | <i>ARFRP1</i>    | 2.173705789 |
| 17,854 | <i>DSCR1L1</i>   | 2.174843406 |
| 17,855 | <i>MAF1</i>      | 2.17613342  |
| 17,856 | <i>FAM22G</i>    | 2.176212115 |
| 17,857 | <i>SLC25A6</i>   | 2.177190441 |
| 17,858 | <i>ZNF526</i>    | 2.177868614 |
| 17,859 | <i>ATP6V1E2</i>  | 2.178092448 |
| 17,860 | <i>TCEAL8</i>    | 2.179485963 |
| 17,861 | <i>MYH1</i>      | 2.179680708 |
| 17,862 | <i>LCT</i>       | 2.185703857 |
| 17,863 | <i>C6ORF201</i>  | 2.187734924 |
| 17,864 | <i>PCOLN3</i>    | 2.190480715 |
| 17,865 | <i>LOC348180</i> | 2.191775003 |
| 17,866 | <i>H63</i>       | 2.195530249 |
| 17,867 | <i>CHN1</i>      | 2.195855299 |
| 17,868 | <i>LCN8</i>      | 2.19593705  |
| 17,869 | <i>IRX2</i>      | 2.197007286 |
| 17,870 | <i>SMNDC1</i>    | 2.197677085 |
| 17,871 | <i>SERPINB2</i>  | 2.199255924 |
| 17,872 | <i>GRIK5</i>     | 2.199563864 |
| 17,873 | <i>FLJ21103</i>  | 2.203547945 |
| 17,874 | <i>KIAA1728</i>  | 2.204351726 |
| 17,875 | <i>C9ORF125</i>  | 2.206399897 |
| 17,876 | <i>ECOP</i>      | 2.206653712 |
| 17,877 | <i>C10ORF118</i> | 2.207311678 |
| 17,878 | <i>HSPC129</i>   | 2.209688699 |
| 17,879 | <i>BRD2</i>      | 2.215113273 |
| 17,880 | <i>MGC35558</i>  | 2.218163522 |
| 17,881 | <i>APOH</i>      | 2.218776002 |
| 17,882 | <i>C20ORF43</i>  | 2.219525949 |
| 17,883 | <i>CEL</i>       | 2.221351357 |
| 17,884 | <i>BOC</i>       | 2.231795984 |
| 17,885 | <i>NTF5</i>      | 2.232528613 |
| 17,886 | <i>DTX3L</i>     | 2.23371033  |
| 17,887 | <i>KRTAP4-2</i>  | 2.23560474  |
| 17,888 | <i>PROP1</i>     | 2.235837362 |
| 17,889 | <i>AMPD3</i>     | 2.237147916 |
| 17,890 | <i>CEI</i>       | 2.2391156   |
| 17,891 | <i>KCTD12</i>    | 2.24193067  |
| 17,892 | <i>TRIM58</i>    | 2.244541528 |
| 17,893 | <i>PPM1B</i>     | 2.244780766 |
| 17,894 | <i>WNT1</i>      | 2.251181948 |
| 17,895 | <i>C20ORF106</i> | 2.252521687 |

|        |                      |             |
|--------|----------------------|-------------|
| 17,896 | <i>PRAP1</i>         | 2.254381823 |
| 17,897 | <i>DLG3</i>          | 2.254461278 |
| 17,898 | <i>PAX1</i>          | 2.254888742 |
| 17,899 | <i>REC14</i>         | 2.258889191 |
| 17,900 | <i>MRPS21</i>        | 2.260412405 |
| 17,901 | <i>IHPK2</i>         | 2.260989842 |
| 17,902 | <i>GRIK4</i>         | 2.26431919  |
| 17,903 | <i>LOC126917</i>     | 2.264637084 |
| 17,904 | <i>CYP2A7</i>        | 2.266180556 |
| 17,905 | <i>LOC142910</i>     | 2.270334453 |
| 17,906 | <i>ABCF3</i>         | 2.271536919 |
| 17,907 | <i>C1ORF6</i>        | 2.272185683 |
| 17,908 | <i>TMOD3</i>         | 2.272347213 |
| 17,909 | <i>POLR2G</i>        | 2.273069139 |
| 17,910 | <i>PDP2</i>          | 2.27396644  |
| 17,911 | <i>HSPC063</i>       | 2.282828074 |
| 17,912 | <i>COL2A1</i>        | 2.283772781 |
| 17,913 | <i>RHOBTB2</i>       | 2.284391415 |
| 17,914 | <i>HSP90B1</i>       | 2.284697178 |
| 17,915 | <i>IGSF6</i>         | 2.291092284 |
| 17,916 | <i>DPEP3</i>         | 2.292943011 |
| 17,917 | <i>DKFZP566A1524</i> | 2.294963371 |
| 17,918 | <i>FGF4</i>          | 2.295477533 |
| 17,919 | <i>KRTAP2-4</i>      | 2.296759897 |
| 17,920 | <i>DOT1L</i>         | 2.297040402 |
| 17,921 | <i>ARHGEF18</i>      | 2.297676022 |
| 17,922 | <i>MGC17299</i>      | 2.299337208 |
| 17,923 | <i>TBCD</i>          | 2.300324281 |
| 17,924 | <i>ICF45</i>         | 2.301528999 |
| 17,925 | <i>OR2G6</i>         | 2.302449937 |
| 17,926 | <i>XLKD1</i>         | 2.304343308 |
| 17,927 | <i>SEPT6</i>         | 2.305683889 |
| 17,928 | <i>SLC27A6</i>       | 2.306785012 |
| 17,929 | <i>CDH4</i>          | 2.310677226 |
| 17,930 | <i>C9ORF16</i>       | 2.311016593 |
| 17,931 | <i>CENPB</i>         | 2.3137115   |
| 17,932 | <i>MGC10204</i>      | 2.314665888 |
| 17,933 | <i>EXT2</i>          | 2.31508639  |
| 17,934 | <i>ARFGAP3</i>       | 2.315891041 |
| 17,935 | <i>UBE2Q2</i>        | 2.316119639 |
| 17,936 | <i>IL10</i>          | 2.316871457 |
| 17,937 | <i>XPNPEP1</i>       | 2.317272062 |
| 17,938 | <i>HOXB3</i>         | 2.317783349 |
| 17,939 | <i>OR4K2</i>         | 2.319184961 |
| 17,940 | <i>AZI1</i>          | 2.329209086 |
| 17,941 | <i>FLJ13456</i>      | 2.329565955 |
| 17,942 | <i>ESR2</i>          | 2.33233435  |

|        |                  |             |
|--------|------------------|-------------|
| 17,943 | <i>RAI17</i>     | 2.333553838 |
| 17,944 | <i>CHRM5</i>     | 2.339669876 |
| 17,945 | <i>FLJ14466</i>  | 2.340382426 |
| 17,946 | <i>NPTX1</i>     | 2.350153595 |
| 17,947 | <i>GALNACT-2</i> | 2.351313289 |
| 17,948 | <i>TBXAS1</i>    | 2.353221786 |
| 17,949 | <i>OR2A42</i>    | 2.35404716  |
| 17,950 | <i>CXORF23</i>   | 2.359092333 |
| 17,951 | <i>DDX55</i>     | 2.359906337 |
| 17,952 | <i>LOC375759</i> | 2.362750322 |
| 17,953 | <i>ZNF133</i>    | 2.365485259 |
| 17,954 | <i>GRIN1</i>     | 2.365944259 |
| 17,955 | <i>PGAM4</i>     | 2.366493636 |
| 17,956 | <i>LRP15</i>     | 2.367520601 |
| 17,957 | <i>EIF4E</i>     | 2.369112116 |
| 17,958 | <i>SERF1A</i>    | 2.371103615 |
| 17,959 | <i>PPY</i>       | 2.372082046 |
| 17,960 | <i>HTCD37</i>    | 2.372752563 |
| 17,961 | <i>C14ORF11</i>  | 2.375772859 |
| 17,962 | <i>VAMP4</i>     | 2.375772995 |
| 17,963 | <i>LOC123722</i> | 2.382708986 |
| 17,964 | <i>SP110</i>     | 2.384547756 |
| 17,965 | <i>NPAS3</i>     | 2.389643371 |
| 17,966 | <i>ZNF265</i>    | 2.394719908 |
| 17,967 | <i>UGT1A9</i>    | 2.396144824 |
| 17,968 | <i>MNT</i>       | 2.396965232 |
| 17,969 | <i>LOC441054</i> | 2.397995446 |
| 17,970 | <i>SCOC</i>      | 2.39885828  |
| 17,971 | <i>TMPRSS9</i>   | 2.400637003 |
| 17,972 | <i>HUMAGCGB</i>  | 2.404221175 |
| 17,973 | <i>B4GALT6</i>   | 2.405070144 |
| 17,974 | <i>VIM</i>       | 2.406463    |
| 17,975 | <i>FLJ20584</i>  | 2.406563751 |
| 17,976 | <i>CTAGE1</i>    | 2.412391772 |
| 17,977 | <i>OR1L4</i>     | 2.413384328 |
| 17,978 | <i>BRD4</i>      | 2.414426022 |
| 17,979 | <i>SURF5</i>     | 2.424541904 |
| 17,980 | <i>ANXA5</i>     | 2.425968751 |
| 17,981 | <i>RARRES3</i>   | 2.428021342 |
| 17,982 | <i>ARL4A</i>     | 2.428626134 |
| 17,983 | <i>TM4SF19</i>   | 2.437273299 |
| 17,984 | <i>HSF4</i>      | 2.437414057 |
| 17,985 | <i>C10ORF84</i>  | 2.440010483 |
| 17,986 | <i>OR3A2</i>     | 2.443008554 |
| 17,987 | <i>ARHGEF16</i>  | 2.443239615 |
| 17,988 | <i>TUBB1</i>     | 2.445030232 |
| 17,989 | <i>FOXD4L2</i>   | 2.445986356 |

|        |           |             |
|--------|-----------|-------------|
| 17,990 | LOC56902  | 2.446001547 |
| 17,991 | MYL5      | 2.45121624  |
| 17,992 | C6ORF150  | 2.452672819 |
| 17,993 | FLJ37964  | 2.457787403 |
| 17,994 | CLTC      | 2.460331381 |
| 17,995 | PTPN7     | 2.460459601 |
| 17,996 | OR5B2     | 2.46219502  |
| 17,997 | OR4K17    | 2.463146679 |
| 17,998 | VPS26A    | 2.464016613 |
| 17,999 | DPP3      | 2.468143478 |
| 18,000 | PLOD3     | 2.477488112 |
| 18,001 | CLUL1     | 2.478394652 |
| 18,002 | PSARL     | 2.47919727  |
| 18,003 | LOC51326  | 2.481115772 |
| 18,004 | EGFL4     | 2.481592406 |
| 18,005 | GABRA4    | 2.482693015 |
| 18,006 | RPL23A    | 2.48635093  |
| 18,007 | COL8A2    | 2.487268737 |
| 18,008 | OR4K15    | 2.488588567 |
| 18,009 | LOC114984 | 2.489536337 |
| 18,010 | ARL2      | 2.493908589 |
| 18,011 | ZBTB16    | 2.507933143 |
| 18,012 | TUBGCP2   | 2.508110992 |
| 18,013 | FLJ40121  | 2.513027391 |
| 18,014 | ENTPD3    | 2.513758627 |
| 18,015 | CXORF20   | 2.516155149 |
| 18,016 | SIK2      | 2.517121053 |
| 18,017 | HRI       | 2.522497565 |
| 18,018 | APOBEC3D  | 2.529016085 |
| 18,019 | SNN       | 2.529976317 |
| 18,020 | FLJ25976  | 2.542722047 |
| 18,021 | UGP2      | 2.545927169 |
| 18,022 | SUPT3H    | 2.546610547 |
| 18,023 | OLFML2A   | 2.55053316  |
| 18,024 | SDR-O     | 2.555836407 |
| 18,025 | NGB       | 2.557109152 |
| 18,026 | LOC92270  | 2.562228805 |
| 18,027 | CD19      | 2.562654109 |
| 18,028 | TBC1D14   | 2.563943119 |
| 18,029 | IRS4      | 2.568794444 |
| 18,030 | C10ORF91  | 2.56933174  |
| 18,031 | SLC12A1   | 2.572883262 |
| 18,032 | FLJ23657  | 2.577317301 |
| 18,033 | DHRS8     | 2.586967631 |
| 18,034 | RBMX      | 2.589092806 |
| 18,035 | HIST1H4B  | 2.592855782 |
| 18,036 | ANKRD29   | 2.596467385 |



|        |                  |             |
|--------|------------------|-------------|
| 18,037 | <i>TTMP</i>      | 2.602745709 |
| 18,038 | <i>TACC2</i>     | 2.604266354 |
| 18,039 | <i>TRIM23</i>    | 2.605183499 |
| 18,040 | <i>SLC24A5</i>   | 2.607102454 |
| 18,041 | <i>GDA</i>       | 2.608107612 |
| 18,042 | <i>UGT1A6</i>    | 2.608914834 |
| 18,043 | <i>VDR</i>       | 2.613271694 |
| 18,044 | <i>PMPCB</i>     | 2.615720542 |
| 18,045 | <i>SPATA5L1</i>  | 2.617361558 |
| 18,046 | <i>TAS2R16</i>   | 2.618690119 |
| 18,047 | <i>NPL</i>       | 2.618843191 |
| 18,048 | <i>TREML1</i>    | 2.61964302  |
| 18,049 | <i>TXNRD2</i>    | 2.620160548 |
| 18,050 | <i>POR</i>       | 2.621382361 |
| 18,051 | <i>MAFF</i>      | 2.622858578 |
| 18,052 | <i>ITPK1</i>     | 2.623636615 |
| 18,053 | <i>MDS1</i>      | 2.633705757 |
| 18,054 | <i>RGR</i>       | 2.636702826 |
| 18,055 | <i>KIAA0186</i>  | 2.6441616   |
| 18,056 | <i>API5</i>      | 2.644355137 |
| 18,057 | <i>FGF23</i>     | 2.647440822 |
| 18,058 | <i>GZMM</i>      | 2.648480772 |
| 18,059 | <i>C20ORF126</i> | 2.649770838 |
| 18,060 | <i>RAMP2</i>     | 2.650631669 |
| 18,061 | <i>MYOZ3</i>     | 2.658766435 |
| 18,062 | <i>MYO3B</i>     | 2.666470426 |
| 18,063 | <i>NDUFA11</i>   | 2.671688981 |
| 18,064 | <i>SIGLEC5</i>   | 2.673126395 |
| 18,065 | <i>KRTHB6</i>    | 2.674521755 |
| 18,066 | <i>KRT6E</i>     | 2.674800169 |
| 18,067 | <i>GRN</i>       | 2.674949203 |
| 18,068 | <i>GRN</i>       | 2.674949203 |
| 18,069 | <i>LIR9</i>      | 2.67930434  |
| 18,070 | <i>FARSLB</i>    | 2.685238338 |
| 18,071 | <i>PDCD1LG2</i>  | 2.68827079  |
| 18,072 | <i>FBXW10</i>    | 2.690782504 |
| 18,073 | <i>TAF5</i>      | 2.69275405  |
| 18,074 | <i>MGC33839</i>  | 2.699072059 |
| 18,075 | <i>MTCH1</i>     | 2.700995128 |
| 18,076 | <i>KIAA1190</i>  | 2.708451457 |
| 18,077 | <i>CELSR3</i>    | 2.710186834 |
| 18,078 | <i>SPATA13</i>   | 2.711319581 |
| 18,079 | <i>SYVN1</i>     | 2.715937776 |
| 18,080 | <i>OPA3</i>      | 2.720993551 |
| 18,081 | <i>LOC143241</i> | 2.726701474 |
| 18,082 | <i>TAP1</i>      | 2.731976852 |
| 18,083 | <i>LRIG2</i>     | 2.740960934 |

|        |                    |             |
|--------|--------------------|-------------|
| 18,084 | <i>LOC90668</i>    | 2.741533684 |
| 18,085 | <i>ARHGAP22</i>    | 2.743880012 |
| 18,086 | <i>APC</i>         | 2.751164615 |
| 18,087 | <i>HOXC6</i>       | 2.758623804 |
| 18,088 | <i>JPH2</i>        | 2.759132948 |
| 18,089 | <i>FOXG1B</i>      | 2.760691746 |
| 18,090 | <i>FLJ10826</i>    | 2.764420977 |
| 18,091 | <i>MTPN</i>        | 2.767474735 |
| 18,092 | <i>PPIL1</i>       | 2.772135197 |
| 18,093 | <i>FLJ43505</i>    | 2.77223612  |
| 18,094 | <i>MANBA</i>       | 2.775647891 |
| 18,095 | <i>NOX1</i>        | 2.784519272 |
| 18,096 | <i>PARD6G</i>      | 2.785309402 |
| 18,097 | <i>PHC1</i>        | 2.804748323 |
| 18,098 | <i>ENTPD5</i>      | 2.812116297 |
| 18,099 | <i>TMEM16C</i>     | 2.814574777 |
| 18,100 | <i>LILRA2</i>      | 2.820255571 |
| 18,101 | <i>CTNBL1</i>      | 2.822543273 |
| 18,102 | <i>LRRTM4</i>      | 2.831363404 |
| 18,103 | <i>GTF2A1</i>      | 2.84205968  |
| 18,104 | <i>OR5K4</i>       | 2.842980861 |
| 18,105 | <i>RP1-93H18.5</i> | 2.846778202 |
| 18,106 | <i>KIAA1007</i>    | 2.859463705 |
| 18,107 | <i>OTUD7</i>       | 2.86634669  |
| 18,108 | <i>FLJ37953</i>    | 2.875013588 |
| 18,109 | <i>ZNF206</i>      | 2.885848318 |
| 18,110 | <i>TANK</i>        | 2.891511837 |
| 18,111 | <i>FLJ21865</i>    | 2.891721983 |
| 18,112 | <i>LCP2</i>        | 2.892538422 |
| 18,113 | <i>OPN3</i>        | 2.906888672 |
| 18,114 | <i>USP20</i>       | 2.909174671 |
| 18,115 | <i>SDCBP</i>       | 2.918325569 |
| 18,116 | <i>LYPLA1</i>      | 2.92272551  |
| 18,117 | <i>MSMB</i>        | 2.9230875   |
| 18,118 | <i>PIR51</i>       | 2.932873568 |
| 18,119 | <i>KLF5</i>        | 2.943270569 |
| 18,120 | <i>ESRRG</i>       | 2.945340656 |
| 18,121 | <i>MGC64882</i>    | 2.950305719 |
| 18,122 | <i>ZNF297B</i>     | 2.953576664 |
| 18,123 | <i>RGS8</i>        | 2.954798244 |
| 18,124 | <i>HIRA</i>        | 2.961848947 |
| 18,125 | <i>PIGC</i>        | 2.964566558 |
| 18,126 | <i>SLA/LP</i>      | 2.965227198 |
| 18,127 | <i>MBD2</i>        | 2.968507207 |
| 18,128 | <i>GPR30</i>       | 2.968614331 |
| 18,129 | <i>SPRR2E</i>      | 2.970770455 |
| 18,130 | <i>GPR172A</i>     | 2.973843394 |

|        |                      |             |
|--------|----------------------|-------------|
| 18,131 | <i>KLHL13</i>        | 2.974152756 |
| 18,132 | <i>MGC52423</i>      | 2.975082795 |
| 18,133 | <i>MELL1</i>         | 2.977638016 |
| 18,134 | <i>AGRP</i>          | 2.977807094 |
| 18,135 | <i>PTS</i>           | 2.980271776 |
| 18,136 | <i>MOCOS</i>         | 2.983292582 |
| 18,137 | <i>HSPB7</i>         | 2.98622728  |
| 18,138 | <i>BRMS1L</i>        | 2.986425445 |
| 18,139 | <i>LYPLA2</i>        | 2.987457444 |
| 18,140 | <i>ZNRD1</i>         | 2.987465555 |
| 18,141 | <i>ARPP-21</i>       | 2.989820774 |
| 18,142 | <i>F11</i>           | 2.993923177 |
| 18,143 | <i>CRLF1</i>         | 2.995873726 |
| 18,144 | <i>TUBB8-PENDING</i> | 3.052417069 |
| 18,145 | <i>KLHL6</i>         | 3.056568125 |
| 18,146 | <i>PRIM1</i>         | 3.069209847 |
| 18,147 | <i>FLJ00193</i>      | 3.070852486 |
| 18,148 | <i>DLAD</i>          | 3.071011562 |
| 18,149 | <i>DPYSL2</i>        | 3.073758938 |
| 18,150 | <i>ISLR</i>          | 3.079962696 |
| 18,151 | <i>CPEB3</i>         | 3.084013943 |
| 18,152 | <i>FBXO42</i>        | 3.094874989 |
| 18,153 | <i>ZNF205</i>        | 3.095855805 |
| 18,154 | <i>DZIP1</i>         | 3.09767561  |
| 18,155 | <i>ZFYVE19</i>       | 3.097807266 |
| 18,156 | <i>MARCH3</i>        | 3.100788553 |
| 18,157 | <i>RASSF4</i>        | 3.102066196 |
| 18,158 | <i>PET112L</i>       | 3.107385849 |
| 18,159 | <i>ZHX2</i>          | 3.107646831 |
| 18,160 | <i>CCL16</i>         | 3.109772343 |
| 18,161 | <i>SEMG1</i>         | 3.110221489 |
| 18,162 | <i>PAK1</i>          | 3.111590073 |
| 18,163 | <i>SLC16A5</i>       | 3.117199784 |
| 18,164 | <i>GPER</i>          | 3.117886889 |
| 18,165 | <i>SEC61A1</i>       | 3.132369382 |
| 18,166 | <i>MANSC1</i>        | 3.132523478 |
| 18,167 | <i>THOC3</i>         | 3.136155057 |
| 18,168 | <i>KRT3</i>          | 3.14351465  |
| 18,169 | <i>DTYMK</i>         | 3.143570283 |
| 18,170 | <i>OTX1</i>          | 3.156906172 |
| 18,171 | <i>PRAMEF8</i>       | 3.164751047 |
| 18,172 | <i>TIMP3</i>         | 3.173095295 |
| 18,173 | <i>SEC61G</i>        | 3.191616854 |
| 18,174 | <i>SLC12A3</i>       | 3.195655019 |
| 18,175 | <i>SAST</i>          | 3.200750367 |
| 18,176 | <i>CCL24</i>         | 3.204190189 |
| 18,177 | <i>SIRT4</i>         | 3.211593749 |

|        |                  |             |
|--------|------------------|-------------|
| 18,178 | <i>CYP1A2</i>    | 3.213841854 |
| 18,179 | <i>LOC254531</i> | 3.214962602 |
| 18,180 | <i>PIAS2</i>     | 3.219972696 |
| 18,181 | <i>DPM2</i>      | 3.226272695 |
| 18,182 | <i>SNAP29</i>    | 3.233084378 |
| 18,183 | <i>ANKRD12</i>   | 3.254982886 |
| 18,184 | <i>CCNL2</i>     | 3.256129081 |
| 18,185 | <i>RNF20</i>     | 3.264634056 |
| 18,186 | <i>FKBP14</i>    | 3.265563779 |
| 18,187 | <i>VILL</i>      | 3.269227505 |
| 18,188 | <i>SFTPD</i>     | 3.273273033 |
| 18,189 | <i>SYT7</i>      | 3.284121821 |
| 18,190 | <i>KRTAP4-4</i>  | 3.295256246 |
| 18,191 | <i>HR</i>        | 3.311432276 |
| 18,192 | <i>ARHGEF2</i>   | 3.313434436 |
| 18,193 | <i>TFAP4</i>     | 3.315951346 |
| 18,194 | <i>UGCG</i>      | 3.316873509 |
| 18,195 | <i>KPNA1</i>     | 3.31840962  |
| 18,196 | <i>MICB</i>      | 3.318516384 |
| 18,197 | <i>COLEC11</i>   | 3.333638797 |
| 18,198 | <i>ZDHHC4</i>    | 3.34080848  |
| 18,199 | <i>CCL7</i>      | 3.343218815 |
| 18,200 | <i>YBX1</i>      | 3.344874451 |
| 18,201 | <i>AP3D1</i>     | 3.358961642 |
| 18,202 | <i>BOLL</i>      | 3.360628172 |
| 18,203 | <i>SERTAD4</i>   | 3.369785977 |
| 18,204 | <i>ZNF135</i>    | 3.386403476 |
| 18,205 | <i>JUND</i>      | 3.391074826 |
| 18,206 | <i>SLC1A2</i>    | 3.407736798 |
| 18,207 | <i>NEDD9</i>     | 3.412687999 |
| 18,208 | <i>BET1L</i>     | 3.423994599 |
| 18,209 | <i>MED31</i>     | 3.433105651 |
| 18,210 | <i>TAF1L</i>     | 3.437822188 |
| 18,211 | <i>TMP21</i>     | 3.453254213 |
| 18,212 | <i>MKRN2</i>     | 3.460854269 |
| 18,213 | <i>TAF1</i>      | 3.461049412 |
| 18,214 | <i>GTF3C2</i>    | 3.476515371 |
| 18,215 | <i>OR10H1</i>    | 3.483576644 |
| 18,216 | <i>PIGQ</i>      | 3.4990193   |
| 18,217 | <i>DSP</i>       | 3.502174507 |
| 18,218 | <i>LOC345778</i> | 3.509317003 |
| 18,219 | <i>CNTD2</i>     | 3.50984525  |
| 18,220 | <i>MCCD1</i>     | 3.513653268 |
| 18,221 | <i>RENT1</i>     | 3.526987345 |
| 18,222 | <i>GCGR</i>      | 3.539077587 |
| 18,223 | <i>TMSB4Y</i>    | 3.553016111 |
| 18,224 | <i>SIN3B</i>     | 3.577908344 |

|        |                     |             |
|--------|---------------------|-------------|
| 18,225 | <i>LOC120824</i>    | 3.578006578 |
| 18,226 | <i>MUC1</i>         | 3.591299143 |
| 18,227 | <i>LY6G6C</i>       | 3.601564389 |
| 18,228 | <i>EP300</i>        | 3.626993879 |
| 18,229 | <i>SLC39A14</i>     | 3.627992308 |
| 18,230 | <i>MGC5352</i>      | 3.698378617 |
| 18,231 | <i>MAOA</i>         | 3.705234316 |
| 18,232 | <i>LOC201176</i>    | 3.719326501 |
| 18,233 | <i>CWF19L2</i>      | 3.737540119 |
| 18,234 | <i>CDR2</i>         | 3.757637416 |
| 18,235 | <i>LOC389860</i>    | 3.75971262  |
| 18,236 | <i>FLJ40121</i>     | 3.786142235 |
| 18,237 | <i>EFCBP2</i>       | 3.798840967 |
| 18,238 | <i>HEPN1</i>        | 3.822129438 |
| 18,239 | <i>C20ORF129</i>    | 3.847470117 |
| 18,240 | <i>BTN2A1</i>       | 3.851399921 |
| 18,241 | <i>LPAL2</i>        | 3.907132937 |
| 18,242 | <i>CHCHD7</i>       | 3.914314572 |
| 18,243 | <i>STK25</i>        | 3.921463494 |
| 18,244 | <i>FLJ13265</i>     | 3.939669011 |
| 18,245 | <i>CREB1</i>        | 4.003394106 |
| 18,246 | <i>CETN1</i>        | 4.050823647 |
| 18,247 | <i>TREM5</i>        | 4.111203516 |
| 18,248 | <i>OR10A7</i>       | 4.129044277 |
| 18,249 | <i>ACVR2B</i>       | 4.130000515 |
| 18,250 | <i>STAU</i>         | 4.158647658 |
| 18,251 | <i>DKFZP4340047</i> | 4.159515208 |
| 18,252 | <i>PKIG</i>         | 4.191646297 |
| 18,253 | <i>LOC164153</i>    | 4.201110572 |
| 18,254 | <i>RPL32</i>        | 4.223079499 |
| 18,255 | <i>CHD5</i>         | 4.223183759 |
| 18,256 | <i>IQGAP3</i>       | 4.270119489 |
| 18,257 | <i>VGLL2</i>        | 4.332257214 |
| 18,258 | <i>GLRXL</i>        | 4.412824686 |
| 18,259 | <i>BCL9L</i>        | 4.426899554 |
| 18,260 | <i>UNG</i>          | 4.466267234 |
| 18,261 | <i>EDD1</i>         | 4.493257143 |
| 18,262 | <i>MLP</i>          | 4.583109851 |
| 18,263 | <i>UNQ3112</i>      | 4.734092263 |
| 18,264 | <i>ETS1</i>         | 4.737856469 |
| 18,265 | <i>PATE2</i>        | 4.740276863 |
| 18,266 | <i>ZBTB12</i>       | 4.784120827 |
| 18,267 | <i>SEC31B</i>       | 5.347507497 |
|        |                     |             |

**Table S2.** Deconvolution study for the top 27 genes. Study included two siRNA collections, siGenome, and OnTarget Plus from GE Healthcare.

| siGENOME |       |       |                       | OTP siRNAs |       |       |                       |
|----------|-------|-------|-----------------------|------------|-------|-------|-----------------------|
|          |       | Mean  | Fold change (vs. NTC) |            |       | Mean  | Fold change (vs. NTC) |
|          | NTC   | 0.525 | 1                     |            | NTC   | 0.461 | 1                     |
| ETS1     | siR-1 | 0.927 | 1.77                  | ETS1       | siR-1 | 0.867 | 1.880                 |
| ETS1     | siR-2 | 0.430 | 0.82                  | ETS1       | siR-2 | 0.437 | 0.948                 |
| ETS1     | siR-3 | 0.387 | 0.74                  | ETS1       | siR-3 | 0.476 | 1.033                 |
| ETS1     | siR-4 | 0.842 | 1.60                  | ETS1       | siR-4 | 0.667 | 1.446                 |
|          |       |       |                       |            |       |       |                       |
| EP300    | siR-1 | 0.462 | 0.88                  | EP300      | siR-1 | 0.236 | 0.512                 |
| EP300    | siR-2 | 0.619 | 1.18                  | EP300      | siR-2 | 0.795 | 1.725                 |
| EP300    | siR-3 | 0.772 | 1.47                  | EP300      | siR-3 | 0.872 | 1.891                 |
| EP300    | siR-4 | 0.905 | 1.72                  | EP300      | siR-4 | 1.168 | 2.533                 |
|          |       |       |                       |            |       |       |                       |
| GCGR     | siR-1 | 0.214 | 0.41                  | GCGR       | siR-1 | 0.718 | 1.557                 |
| GCGR     | siR-2 | 0.617 | 1.17                  | GCGR       | siR-2 | 0.302 | 0.655                 |
| GCGR     | siR-3 | 0.268 | 0.51                  | GCGR       | siR-3 | 0.419 | 0.908                 |
| GCGR     | siR-4 | 0.843 | 1.61                  | GCGR       | siR-4 | 1.082 | 2.347                 |
|          |       |       |                       |            |       |       |                       |
| PKIG     | siR-1 | 0.546 | 1.04                  | PKIG       | siR-1 | 0.743 | 1.611                 |
| PKIG     | siR-2 | 0.464 | 0.88                  | PKIG       | siR-2 | 1.042 | 2.260                 |
| PKIG     | siR-3 | 1.189 | 2.26                  | PKIG       | siR-3 | 1.261 | 2.735                 |
| PKIG     | siR-4 | 0.997 | 1.90                  | PKIG       | siR-4 | 1.522 | 3.301                 |
|          |       |       |                       |            |       |       |                       |
| SLC1A2   | siR-1 | 0.233 | 0.44                  | SLC1A2     | siR-1 | 0.488 | 1.058                 |
| SLC1A2   | siR-2 | 0.291 | 0.55                  | SLC1A2     | siR-2 | 0.250 | 0.543                 |
| SLC1A2   | siR-3 | 0.699 | 1.33                  | SLC1A2     | siR-3 | 0.592 | 1.285                 |
| SLC1A2   | siR-4 | 1.113 | 2.12                  | SLC1A2     | siR-4 | 1.187 | 2.574                 |

|         |         |       |      |         |         |       |       |
|---------|---------|-------|------|---------|---------|-------|-------|
|         | NTC     | 0.647 | 1    |         | NTC     | 0.592 | 1     |
| BTN2A1  | siRNA 1 | 0.679 | 1.05 | BTN2A1  | siRNA 1 | 0.920 | 1.552 |
| BTN2A1  | siRNA 2 | 0.475 | 0.74 | BTN2A1  | siRNA 2 | 0.507 | 0.856 |
| BTN2A1  | siRNA 3 | 0.659 | 1.02 | BTN2A1  | siRNA 3 | 0.406 | 0.686 |
| BTN2A1  | siRNA 4 | 0.772 | 1.19 | BTN2A1  | siRNA 4 | 2.299 | 3.881 |
|         |         |       |      |         |         |       |       |
| COLEC11 | siRNA 1 | 0.557 | 0.86 | COLEC11 | siRNA 1 | 2.232 | 3.768 |
| COLEC11 | siRNA 2 | 0.624 | 0.96 | COLEC11 | siRNA 2 | 0.409 | 0.691 |
| COLEC11 | siRNA 3 | 1.209 | 1.87 | COLEC11 | siRNA 3 | 0.340 | 0.574 |
| COLEC11 | siRNA 4 | 0.772 | 1.19 | COLEC11 | siRNA 4 | 0.179 | 0.301 |
|         |         |       |      |         |         |       |       |
| DPM2    | siRNA 1 | 0.415 | 0.64 | DPM2    | siRNA 1 | 1.039 | 1.754 |
| DPM2    | siRNA 2 | 0.540 | 0.83 | DPM2    | siRNA 2 | 0.294 | 0.497 |

|       |         |       |      |  |       |         |       |       |
|-------|---------|-------|------|--|-------|---------|-------|-------|
| DPM2  | siRNA 3 | 0.717 | 1.11 |  | DPM2  | siRNA 3 | 1.231 | 2.078 |
| DPM2  | siRNA 4 | 0.607 | 0.94 |  | DPM2  | siRNA 4 | 0.400 | 0.675 |
|       |         |       |      |  |       |         |       |       |
| BCL9  | siRNA 1 | 1.849 | 2.86 |  | BCL9L | siRNA 1 | 1.656 | 2.796 |
| BCL9  | siRNA 2 | 0.395 | 0.61 |  | BCL9L | siRNA 2 | 0.437 | 0.738 |
| BCL9  | siRNA 3 | 0.792 | 1.22 |  | BCL9L | siRNA 3 | 0.304 | 0.514 |
| BCL9  | siRNA 4 | 0.621 | 0.96 |  | BCL9L | siRNA 4 | 1.469 | 2.479 |
|       |         |       |      |  |       |         |       |       |
| CNTD2 | siRNA 1 | 0.612 | 0.95 |  | CNTD2 | siRNA 1 | 0.598 | 1.009 |
| CNTD2 | siRNA 2 | 1.949 | 3.01 |  | CNTD2 | siRNA 2 | 0.906 | 1.530 |
| CNTD2 | siRNA 3 | 0.652 | 1.01 |  | CNTD2 | siRNA 3 | 0.490 | 0.827 |
| CNTD2 | siRNA 4 | 0.707 | 1.09 |  | CNTD2 | siRNA 4 | 0.337 | 0.570 |

|          |         |       |      |  |          |         |       |       |
|----------|---------|-------|------|--|----------|---------|-------|-------|
|          | NTC     | 0.678 | 1    |  |          | NTC     | 0.607 | 1     |
| LY6G6C   | siRNA 1 | 0.504 | 0.74 |  | LY6G6C   | siRNA 1 | 2.410 | 3.970 |
| LY6G6C   | siRNA 2 | 0.543 | 0.80 |  | LY6G6C   | siRNA 2 | 1.350 | 2.224 |
| LY6G6C   | siRNA 3 | 0.687 | 1.01 |  | LY6G6C   | siRNA 3 | 0.831 | 1.369 |
| LY6G6C   | siRNA 4 | 0.165 | 0.24 |  | LY6G6C   | siRNA 4 | 0.419 | 0.690 |
|          |         |       |      |  |          |         |       |       |
| MED31    | siRNA 1 | 0.483 | 0.71 |  | MED31    | siRNA 1 | 2.086 | 3.437 |
| MED31    | siRNA 2 | 0.580 | 0.86 |  | MED31    | siRNA 2 | 0.562 | 0.925 |
| MED31    | siRNA 3 | 1.870 | 2.76 |  | MED31    | siRNA 3 | 0.572 | 0.942 |
| MED31    | siRNA 4 | 0.441 | 0.65 |  | MED31    | siRNA 4 | 0.458 | 0.755 |
|          |         |       |      |  |          |         |       |       |
| KRTAP4-4 | siRNA 1 | 0.702 | 1.04 |  | KRTAP4-4 | siRNA 1 | 0.611 | 1.006 |
| KRTAP4-4 | siRNA 2 | 0.553 | 0.82 |  | KRTAP4-4 | siRNA 2 | 0.558 | 0.919 |
| KRTAP4-4 | siRNA 3 | 1.169 | 1.73 |  | KRTAP4-4 | siRNA 3 | 1.455 | 2.397 |
| KRTAP4-4 | siRNA 4 | 0.496 | 0.73 |  | KRTAP4-4 | siRNA 4 | 0.444 | 0.731 |
|          |         |       |      |  |          |         |       |       |
| MCCD1    | siRNA 1 | 1.438 | 2.12 |  | MCCD1    | siRNA 1 | 0.526 | 0.867 |
| MCCD1    | siRNA 2 | 0.425 | 0.63 |  | MCCD1    | siRNA 2 | 0.635 | 1.046 |
| MCCD1    | siRNA 3 | 0.502 | 0.74 |  | MCCD1    | siRNA 3 | 1.353 | 2.228 |
| MCCD1    | siRNA 4 | 0.500 | 0.74 |  | MCCD1    | siRNA 4 | 0.497 | 0.818 |

|        |         |       |      |  |        |         |        |       |
|--------|---------|-------|------|--|--------|---------|--------|-------|
|        | NTC     | 0.751 | 1    |  |        | NTC     | 0.6977 | 1     |
| ACVR2B | siRNA 1 | 0.743 | 0.99 |  | ACVR2B | siRNA 1 | 0.6153 | 0.882 |
| ACVR2B | siRNA 2 | 1.446 | 1.93 |  | ACVR2B | siRNA 2 | 0.6803 | 0.975 |
| ACVR2B | siRNA 3 | 0.738 | 0.98 |  | ACVR2B | siRNA 3 | 1.3669 | 1.959 |
| ACVR2B | siRNA 4 | 0.755 | 1.01 |  | ACVR2B | siRNA 4 | 0.6382 | 0.915 |
|        |         |       |      |  |        |         |        |       |
| ZNF205 | siRNA 1 | 0.549 | 0.73 |  | ZNF205 | siRNA 1 | 1.8624 | 2.669 |
| ZNF205 | siRNA 2 | 0.819 | 1.09 |  | ZNF205 | siRNA 2 | 0.5888 | 0.844 |
| ZNF205 | siRNA 3 | 1.535 | 2.04 |  | ZNF205 | siRNA 3 | 1.1587 | 1.661 |
| ZNF205 | siRNA 4 | 1.671 | 2.23 |  | ZNF205 | siRNA 4 | 0.6137 | 0.880 |

|        |         |       |      |  |        |         |        |       |
|--------|---------|-------|------|--|--------|---------|--------|-------|
|        |         |       |      |  |        |         |        |       |
| PATE2  | siRNA 1 | 0.804 | 1.07 |  | PATE2  | siRNA 1 | 0.7201 | 1.032 |
| PATE2  | siRNA 2 | 0.719 | 0.96 |  | PATE2  | siRNA 2 | 0.5945 | 0.852 |
| PATE2  | siRNA 3 | 0.750 | 1.00 |  | PATE2  | siRNA 3 | 2.0165 | 2.890 |
| PATE2  | siRNA 4 | 0.573 | 0.76 |  | PATE2  | siRNA 4 | 1.2007 | 1.721 |
|        |         |       |      |  |        |         |        |       |
| ZNF135 | siRNA 1 | 1.810 | 2.41 |  | ZNF135 | siRNA 1 | 0.6658 | 0.954 |
| ZNF135 | siRNA 2 | 0.790 | 1.05 |  | ZNF135 | siRNA 2 | 1.9374 | 2.777 |
| ZNF135 | siRNA 3 | 0.710 | 0.95 |  | ZNF135 | siRNA 3 | 0.6317 | 0.905 |
| ZNF135 | siRNA 4 | 0.739 | 0.98 |  | ZNF135 | siRNA 4 | 0.7088 | 1.016 |
|        |         |       |      |  |        |         |        |       |
| GLRXP3 | siRNA 1 | 1.820 | 2.42 |  | GLRXP3 | siRNA 1 | 0.6564 | 0.941 |
| GLRXP3 | siRNA 2 | 0.639 | 0.85 |  | GLRXP3 | siRNA 2 | 1.4625 | 2.096 |
| GLRXP3 | siRNA 3 | 0.958 | 1.28 |  | GLRXP3 | siRNA 3 | 1.3195 | 1.891 |
| GLRXP3 | siRNA 4 | 0.561 | 0.75 |  | GLRXP3 | siRNA 4 | 0.7732 | 1.108 |

|         |         |       |      |  |         |         |        |       |
|---------|---------|-------|------|--|---------|---------|--------|-------|
|         | NTC     | 0.726 | 1    |  |         | NTC     | 0.6736 | 1     |
| SEC61A1 | siRNA 1 | 0.711 | 0.98 |  | SEC61A1 | siRNA 1 | 1.2855 | 1.908 |
| SEC61A1 | siRNA 2 | 1.305 | 1.80 |  | SEC61A1 | siRNA 2 | 1.0242 | 1.520 |
| SEC61A1 | siRNA 3 | 1.689 | 2.33 |  | SEC61A1 | siRNA 3 | 0.8077 | 1.199 |
| SEC61A1 | siRNA 4 | 2.060 | 2.84 |  | SEC61A1 | siRNA 4 | 0.5263 | 0.781 |
|         |         |       |      |  |         |         |        |       |
| SIN3B   | siRNA 1 | 1.597 | 2.20 |  | SIN3B   | siRNA 1 | 0.6873 | 1.020 |
| SIN3B   | siRNA 2 | 0.841 | 1.16 |  | SIN3B   | siRNA 2 | 1.1052 | 1.641 |
| SIN3B   | siRNA 3 | 0.557 | 0.77 |  | SIN3B   | siRNA 3 | 1.4059 | 2.087 |
| SIN3B   | siRNA 4 | 1.619 | 2.23 |  | SIN3B   | siRNA 4 | 1.9317 | 2.868 |
|         |         |       |      |  |         |         |        |       |
| SEC31B  | siRNA 1 | 0.639 | 0.88 |  | SEC31B  | siRNA 1 | 0.5917 | 0.878 |
| SEC31B  | siRNA 2 | 0.601 | 0.83 |  | SEC31B  | siRNA 2 | 0.603  | 0.895 |
| SEC31B  | siRNA 3 | 0.574 | 0.79 |  | SEC31B  | siRNA 3 | 0.9163 | 1.360 |
| SEC31B  | siRNA 4 | 1.592 | 2.19 |  | SEC31B  | siRNA 4 | 1.7509 | 2.599 |
|         |         |       |      |  |         |         |        |       |
| SEC61G  | siRNA 1 | 0.636 | 0.88 |  | SEC61G  | siRNA 1 | 0.7091 | 1.053 |
| SEC61G  | siRNA 2 | 0.618 | 0.85 |  | SEC61G  | siRNA 2 | 0.6671 | 0.990 |
| SEC61G  | siRNA 3 | 1.106 | 1.52 |  | SEC61G  | siRNA 3 | 0.727  | 1.079 |
| SEC61G  | siRNA 4 | 1.228 | 1.69 |  | SEC61G  | siRNA 4 | 0.5842 | 0.867 |

|       |         |       |      |
|-------|---------|-------|------|
|       | NTC     | 0.809 | 1    |
| DTYMK | siRNA 1 | 0.743 | 0.92 |
| DTYMK | siRNA 2 | 0.786 | 0.97 |
| DTYMK | siRNA 3 | 1.277 | 1.58 |
| DTYMK | siRNA 4 | 0.647 | 0.80 |
|       |         |       |      |
| OPN3  | siRNA 1 | 1.172 | 1.45 |

|       |         |        |       |
|-------|---------|--------|-------|
|       | NTC     | 0.7699 | 1     |
| DTYMK | siRNA 1 | 1.1045 | 1.435 |
| DTYMK | siRNA 2 | 0.7463 | 0.969 |
| DTYMK | siRNA 3 | 1.0197 | 1.324 |
| DTYMK | siRNA 4 | 1.0198 | 1.325 |
|       |         |        |       |
| OPN3  | siRNA 1 | 1.1723 | 1.523 |



|      |         |       |      |
|------|---------|-------|------|
| OPN3 | siRNA 2 | 0.866 | 1.07 |
| OPN3 | siRNA 3 | 1.692 | 2.09 |
| OPN3 | siRNA 4 | 0.750 | 0.93 |
|      |         |       |      |
| GEPR | siRNA 1 | 0.790 | 0.98 |
| GEPR | siRNA 2 | 1.448 | 1.79 |
| GEPR | siRNA 3 | 0.699 | 0.86 |
| GEPR | siRNA 4 | 0.824 | 1.02 |
|      |         |       |      |
| PAK1 | siRNA 1 | 1.989 | 2.46 |
| PAK1 | siRNA 2 | 0.801 | 0.99 |
| PAK1 | siRNA 3 | 1.522 | 1.88 |
| PAK1 | siRNA 4 | 0.706 | 0.87 |

|      |         |        |       |
|------|---------|--------|-------|
| OPN3 | siRNA 2 | 0.7161 | 0.930 |
| OPN3 | siRNA 3 | 1.6924 | 2.198 |
| OPN3 | siRNA 4 | 0.7497 | 0.974 |
|      |         |        |       |
| GEPR | siRNA 1 | 0.6404 | 0.832 |
| GEPR | siRNA 2 | 1.4484 | 1.881 |
| GEPR | siRNA 3 | 0.6985 | 0.907 |
| GEPR | siRNA 4 | 0.8239 | 1.070 |
|      |         |        |       |
| PAK1 | siRNA 1 | 1.9894 | 2.584 |
| PAK1 | siRNA 2 | 1.1008 | 1.430 |
| PAK1 | siRNA 3 | 1.522  | 1.977 |
| PAK1 | siRNA 4 | 0.7058 | 0.917 |

**Table S3.** Functions and pathways associated with the top-scoring genes identified from the secondary screen in Vero cells.

| <b>Hit-gene</b> | <b>Location</b>       | <b>Gene function(s)</b>                                                                                                                                                                                                                                                                             | <b>(Potentially) Associated with:</b>                                                                                                                                                    |
|-----------------|-----------------------|-----------------------------------------------------------------------------------------------------------------------------------------------------------------------------------------------------------------------------------------------------------------------------------------------------|------------------------------------------------------------------------------------------------------------------------------------------------------------------------------------------|
| <b>ETS1</b>     | Nucleus               | Transcription factor in the CREB-dependent transcription pathway, and the ERK1/2 signaling pathway (1)                                                                                                                                                                                              | Cell proliferation, apoptosis, cell survival, cell cycle, cellular organization and assembly, molecular transport, nucleic acid metabolism, gene expression, small molecule biochemistry |
| <b>GLRXP3</b>   | Cytoplasm             | Glutaredoxin thioltransferase; controlling the S-glutathionylation status of cell signaling mediators. Regulation of NF- $\kappa$ B mediated gene transcription                                                                                                                                     | Cell survival and death/apoptosis                                                                                                                                                        |
| <b>BTN2A1</b>   | Cell membrane         | Lipid metabolism                                                                                                                                                                                                                                                                                    | Unknown                                                                                                                                                                                  |
| <b>LY6G6C</b>   | Cell surface          | Signal transduction                                                                                                                                                                                                                                                                                 | Possible role in T-cell activation and homing of T-cells (2)                                                                                                                             |
| <b>EP300</b>    | Nucleus               | Regulates gene transcription via histone acetylation in the CREB-dependent and (the ERK1/2 activated) NF- $\kappa$ B p65 transcription pathways (3, 4). Involved in cAMP mediated signaling, G-protein coupled receptor signaling, estrogen receptor signaling, and wnt/ $\beta$ -catenin signaling | Apoptosis, cell cycle, cell growth, cellular organization and assembly, molecular transport, cell signaling, gene expression, nucleic acid metabolism, small molecule biochemistry       |
| <b>TAF1L</b>    | Nucleus/<br>cytoplasm | Kinase-, histone acetyltransferase-, ubiquitin-activating and conjugating activity; regulating assembly of RNA polymerase II complex (5)                                                                                                                                                            | Gene expression, cellular organization and assembly, (estrogen receptor) cell signaling                                                                                                  |
| <b>MCCD1</b>    | Mitochondria          | Unknown                                                                                                                                                                                                                                                                                             | Unknown                                                                                                                                                                                  |
| <b>GCGR</b>     | Cell membrane         | Glucagon receptor involved in signal transduction: regulates accumulation of intracellular cyclic AMP and calcium. Activates the CREB-dependent and ERK1/2 pathways (6)                                                                                                                             | Cell death/apoptosis, proliferation, molecular transport and cell signaling                                                                                                              |
| <b>CNTD2</b>    | Unknown               | Assembles into interactome of NF- $\kappa$ B regulators (4)                                                                                                                                                                                                                                         | Unknown                                                                                                                                                                                  |
| <b>SEC61G</b>   | ER membrane           | Protein transport ER-Golgi (7)                                                                                                                                                                                                                                                                      | Cell growth and apoptosis, antigen processing                                                                                                                                            |
| <b>ZNF205</b>   | Nucleus               | Negative regulation of transcription from RNA pol II promoter                                                                                                                                                                                                                                       | Apoptosis (8)                                                                                                                                                                            |

### References for Table 3

1. Liang ZL, Mao QY, Wang YP, Zhu FC, Li JX, Yao X, Gao F, Wu X, Xu M, Wang JZ. 2013. Progress on the research and development of inactivated EV71 whole-virus vaccines. *Hum Vaccin Immunother* 9:1701-1705.
2. Mallya M, Campbell RD, Aguado B. 2002. Transcriptional analysis of a novel cluster of LY-6 family members in the human and mouse major histocompatibility complex: five genes with many splice forms. *Genomics* 80:113-123.
3. Hayden MS, Ghosh S. 2008. Shared principles in NF- $\kappa$ B signaling. *Cell* 132:344-362.
4. Gewurz BE, Towfic F, Mar JC, Shinnars NP, Takasaki K, Zhao B, Cahir-McFarland ED, Quackenbush J, Xavier RJ, Kieff E. 2012. Genome-wide siRNA screen for mediators of NF- $\kappa$ B activation. *Proc Natl Acad Sci USA* 109:2467-2472.
5. Tavassoli P, Wafa LA, Cheng H, Zoubeidi A, Fazli L, Gleave M, Snoek R, Rennie PS. 2010. TAF1 differentially enhances androgen receptor transcriptional activity via its N-terminal kinase and ubiquitin-activating and -conjugating domains. *Mol Endocrinol* 24:696-708.
6. Xu Y, Xie X. 2009. Glucagon receptor mediates calcium signaling by coupling to  $G\alpha_{q/11}$  and  $G\alpha_{i/o}$  in HEK293 cells. *J Recept Signal Transduct Res* 29:318-325.
7. Lu Z, Zhou L, Killela P, Rasheed AB, Di C, Poe WE, McLendon RE, Bigner DD, Nicchitta C, Yan H. 2009. Glioblastoma proto-oncogene SEC61 $\gamma$  is required for tumor cell survival and response to endoplasmic reticulum stress. *Cancer Res* 69:9105-9111.
8. Iida R, Ueki M, Yasuda T. 2012. Identification of Rhit as a novel transcriptional repressor of human Mpv17-like protein with a mitigating effect on mitochondrial dysfunction, and its transcriptional regulation by FOXD3 and GABP. *Free Radic Biol Med* 52:1413-1422.
